# Supplementary material for: Control of nuclear size by osmotic forces in Schizosaccharomyces pombe
Source: eLife. 2022 Jul 20;11:e76075. doi: 10.7554/eLife.76075 (PMC9410708; doi:10.7554/eLife.76075)
Supplement: Figure 2—figure supplement 1—source data 1. — Related to Figure 2—figure supplement 1. [file elife-76075-fig2-figsupp1-data1.xlsx]

## Sheet: Sheet1
Volume Cell	Volume Nucl	Vnc Ratio	Condition		Volume Cell	Volume Nucl	Vnc Ratio	Condition		Volume Cell	Volume Nucl	Vnc Ratio	Condition
169.3877	14.747810000000001	8.706541265983304	cut11-GFP		83.66965	6.20742	7.418962550936928	gpd1 ish1-GFP		67.9065	5.079330000000001	7.479887786883436	ish1-GFP
92.79743	7.8384100000000005	8.446796425288932	cut11-GFP		78.08967	5.82891	7.464380371949324	gpd1 ish1-GFP		69.14177	4.45132	6.437960729093282	ish1-GFP
89.72464000000001	7.943110000000001	8.852763298910979	cut11-GFP		84.57508	6.821510000000001	8.06562642329159	gpd1 ish1-GFP		106.70147	7.504460000000001	7.033136469441331	ish1-GFP
152.8899	11.11562	7.270342906889206	cut11-GFP		128.01556000000002	8.80616	6.878976274446637	gpd1 ish1-GFP		97.72239	7.00789	7.171222480334342	ish1-GFP
153.81717	10.25256	6.665419731750363	cut11-GFP		107.1907	7.86285	7.335384506305117	gpd1 ish1-GFP		91.22657	7.6357	8.370039561939027	ish1-GFP
85.00017	6.6843	7.863866625207927	cut11-GFP		78.09268	7.08373	9.070927006218765	gpd1 ish1-GFP		118.99181000000002	8.3095	6.983253721411582	ish1-GFP
139.1142	11.08177	7.965951714490685	cut11-GFP		79.01836999999999	6.135330000000001	7.764435029474794	gpd1 ish1-GFP		122.73451999999999	9.460980000000001	7.708491465970618	ish1-GFP
80.44289	5.9200099999999996	7.359270657729973	cut11-GFP		90.99948	6.6873	7.348723311385955	gpd1 ish1-GFP		158.93825	11.62054	7.311355196121763	ish1-GFP
79.62885	6.963360000000001	8.744770268564723	cut11-GFP		127.06866000000001	9.58226	7.541009718682797	gpd1 ish1-GFP		88.11827	7.03528	7.983906175189323	ish1-GFP
73.83208	6.20258	8.400928160225202	cut11-GFP		80.58629	6.11562	7.588908733731257	gpd1 ish1-GFP		127.3049	7.3294	5.757358907630421	ish1-GFP
128.96165	8.12603	6.301121302340658	cut11-GFP		83.70135	5.55995	6.642604928116451	gpd1 ish1-GFP		65.36386	5.13214	7.851647684209591	ish1-GFP
149.63471	10.681410000000001	7.138323721815613	cut11-GFP		70.25986999999999	4.82472	6.866964029395444	gpd1 ish1-GFP		55.3523	4.75666	8.593427915371176	ish1-GFP
130.42924	10.619019999999999	8.14159463016115	cut11-GFP		107.29186999999999	9.10533	8.486505081885516	gpd1 ish1-GFP		90.66741999999999	7.58053	8.360809207982317	ish1-GFP
116.71946000000001	9.411810000000001	8.06361681248354	cut11-GFP		95.96346	6.15469	6.4135765842540495	gpd1 ish1-GFP		96.31133	7.451160000000001	7.736535254990249	ish1-GFP
133.7411	9.935410000000001	7.428838255405408	cut11-GFP		103.45617	8.0148	7.747048822704339	gpd1 ish1-GFP		89.21785	7.06601	7.919950996353309	ish1-GFP
152.91378999999998	12.104510000000001	7.915904772224927	cut11-GFP		100.70984	6.77002	6.722302408582914	gpd1 ish1-GFP		136.32025	11.05044	8.106235133811742	ish1-GFP
123.73839	10.34783	8.36266739853331	cut11-GFP		118.80285	8.74658	7.362264457460406	gpd1 ish1-GFP		125.69386999999999	9.83382	7.823627357483702	ish1-GFP
84.02233000000001	6.32265	7.524963899477674	cut11-GFP		88.6853	6.9779	7.868158533601398	gpd1 ish1-GFP		59.50878	3.79389	6.375344949098268	ish1-GFP
89.74504	7.1261399999999995	7.9404276826886475	cut11-GFP		82.58740999999999	5.70599	6.909031291815546	gpd1 ish1-GFP		55.21131999999999	3.92309	7.105589940613628	ish1-GFP
89.73807	6.98464	7.783363292747437	cut11-GFP		113.96088999999999	6.79535	5.962879019284599	gpd1 ish1-GFP		95.98711999999999	7.09727	7.393981609199235	ish1-GFP
100.24631	7.369439999999999	7.351332931855546	cut11-GFP		114.02645	9.553519999999999	8.378336780632914	gpd1 ish1-GFP		86.78943000000001	6.740889999999999	7.766948117990864	ish1-GFP
75.14315	6.1694	8.21019613896942	cut11-GFP		95.24374	7.77367	8.161869745980157	gpd1 ish1-GFP		81.70071	6.10269	7.4695678899240905	ish1-GFP
77.4928	5.29966	6.838906324200441	cut11-GFP		107.92426	8.932030000000001	8.27620221811111	gpd1 ish1-GFP		76.82875	5.95167	7.746670354522232	ish1-GFP
60.28094	4.866169999999999	8.072485266487217	cut11-GFP		119.24033	9.222380000000001	7.734279165446792	gpd1 ish1-GFP		74.43266	5.65902	7.6028721800349475	ish1-GFP
102.9529	7.123410000000001	6.919096013808257	cut11-GFP		142.99235	10.71145	7.490925213831369	gpd1 ish1-GFP		130.92543	9.792869999999999	7.479731019405472	ish1-GFP
134.69251	10.80213	8.019844607543508	cut11-GFP		122.55676000000001	9.22148	7.524252436177326	gpd1 ish1-GFP		86.65231999999999	6.36108	7.340922897390401	ish1-GFP
106.92306	8.21712	7.685077475336002	cut11-GFP		102.17065	7.5941399999999994	7.432799928355159	gpd1 ish1-GFP		71.34366	5.60018	7.849583270608769	ish1-GFP
112.43351000000001	8.97273	7.980476639037596	cut11-GFP		93.31673	5.68706	6.0943627150244115	gpd1 ish1-GFP		78.41386999999999	5.16783	6.590453959229409	ish1-GFP
143.44973000000002	11.88129	8.282546087747951	cut11-GFP		79.11766999999999	6.3691	8.05016123452574	gpd1 ish1-GFP		91.60213	7.24927	7.913866195032801	ish1-GFP
135.87791	8.96385	6.596988428803476	cut11-GFP		78.60648	5.899369999999999	7.504941068471707	gpd1 ish1-GFP		80.57547	6.89233	8.553881224645664	ish1-GFP
157.92918999999998	11.31645	7.165521459332503	cut11-GFP		72.89244000000001	6.48044	8.890414424321644	gpd1 ish1-GFP		75.62956	5.861669999999999	7.750501259031521	ish1-GFP
94.59016	6.875319999999999	7.268536177547431	cut11-GFP		88.61119000000001	7.1959	8.120757660516691	gpd1 ish1-GFP		59.37146	3.9807300000000003	6.704787114886514	ish1-GFP
70.63985	5.44407	7.706797225645298	cut11-GFP		96.01115	7.326789999999999	7.631186586141296	gpd1 ish1-GFP		59.239540000000005	5.27991	8.912813975260441	ish1-GFP
80.98952	6.48192	8.003405872759833	cut11-GFP		94.10425	7.7367300000000006	8.221445896439322	gpd1 ish1-GFP		96.20484	7.622089999999999	7.922771868858155	ish1-GFP
106.61543999999999	7.60906	7.136921256433403	cut11-GFP		90.18238000000001	6.43995	7.1410291012501546	gpd1 ish1-GFP		60.16091	4.02869	6.696524371057552	ish1-GFP
99.21725	7.3631	7.4211893597131535	cut11-GFP		145.38284	11.12293	7.6507860212388215	gpd1 ish1-GFP		60.268809999999995	4.40874	7.315127011799303	ish1-GFP
102.8324	7.5604	7.352157491218721	cut11-GFP		97.28965	7.23848	7.440133662727742	gpd1 ish1-GFP		64.81184	5.08745	7.84956884421118	ish1-GFP
77.3817	5.56902	7.196817852282905	cut11-GFP		76.60911999999999	6.79232	8.866202875062395	gpd1 ish1-GFP		62.76724	4.8240300000000005	7.685585665388506	ish1-GFP
60.35235	4.81867	7.984229280218583	cut11-GFP		74.30396	5.6057	7.54428162375195	gpd1 ish1-GFP		77.71853	5.20482	6.697012926003618	ish1-GFP
107.39408999999999	6.34768	5.9106418239588425	cut11-GFP		84.51921	6.41927	7.595042594458704	gpd1 ish1-GFP		73.90841999999999	5.40828	7.317542439684139	ish1-GFP
110.8812	8.22413	7.4170643896350335	cut11-GFP		81.02121	7.15455	8.830465504032833	gpd1 ish1-GFP		94.74235	7.65637	8.081254053757373	ish1-GFP
83.46727	5.90225	7.071334668068095	cut11-GFP		76.78888	5.462219999999999	7.1132955709212045	gpd1 ish1-GFP		95.23402	6.95051	7.298347796302204	ish1-GFP
90.02721	7.9323	8.811002806818072	cut11-GFP		75.69626	5.83303	7.705836457441888	gpd1 ish1-GFP		133.28422	10.82594	8.122446903316836	ish1-GFP
96.13689000000001	7.46696	7.767008065270262	cut11-GFP		75.96571999999999	6.67143	8.782158584161383	gpd1 ish1-GFP		97.92243	6.854830000000001	7.000265414165069	ish1-GFP
124.54578000000001	9.962010000000001	7.998673258941412	cut11-GFP		117.01933999999999	10.90428	9.318357119430003	gpd1 ish1-GFP		96.08733000000001	6.938439999999999	7.220972837938152	ish1-GFP
134.75146	9.46723	7.025697532331004	cut11-GFP		79.63672	6.09826	7.657598153213743	gpd1 ish1-GFP		86.78963	6.6048	7.610125771938421	ish1-GFP
115.32082	8.85497	7.678552753960647	cut11-GFP		89.60101999999999	5.83979	6.517548572549732	gpd1 ish1-GFP		69.60741999999999	5.289630000000001	7.599232955337235	ish1-GFP
147.37785	9.59874	6.513013997693682	cut11-GFP		70.83646	5.31473	7.502817052122593	gpd1 ish1-GFP		70.05767	5.13028	7.322938373485729	ish1-GFP
137.23838	12.26126	8.934279171759387	cut11-GFP		74.14765	5.38467	7.262091246317313	gpd1 ish1-GFP		66.91759	5.2291	7.814238378877661	ish1-GFP
132.68599	9.14988	6.895890063449802	cut11-GFP		84.99145	6.511480000000001	7.6613353460848135	gpd1 ish1-GFP		58.99119	4.0826199999999995	6.9207283324849005	ish1-GFP
106.34243000000001	7.49746	7.0502996781247145	cut11-GFP		114.79661999999999	8.92988	7.778870144434567	gpd1 ish1-GFP		100.02622	7.49892	7.496954298582911	ish1-GFP
155.59918000000002	8.62677	5.544225875740476	cut11-GFP		144.11196	9.81058	6.807609861110764	gpd1 ish1-GFP		82.85488000000001	6.09096	7.351359388849516	ish1-GFP
81.1909	6.25858	7.708474718225812	cut11-GFP		128.6234	9.06637	7.0487718408936475	gpd1 ish1-GFP		147.88603	11.23098	7.59434816121577	ish1-GFP
81.33655999999999	7.183669999999999	8.832030762058292	cut11-GFP		113.30393000000001	8.6433	7.62842030280856	gpd1 ish1-GFP		138.04041999999998	10.500580000000001	7.606887895588844	ish1-GFP
112.21345	9.53437	8.496637435173769	cut11-GFP		86.20223	6.65406	7.719127451807221	gpd1 ish1-GFP		94.64229	7.09987	7.501794388111277	ish1-GFP
136.39049	12.20047	8.94524977511262	cut11-GFP		89.8065	7.314610000000001	8.144855884596328	gpd1 ish1-GFP		91.56578	7.05001	7.699393812841435	ish1-GFP
108.26403	8.64772	7.987620634480352	cut11-GFP		101.8936	7.74063	7.596777422723311	gpd1 ish1-GFP		145.87292	11.808060000000001	8.094758094922623	ish1-GFP
107.48948	7.91905	7.367279104894731	cut11-GFP		110.64883999999999	7.267589999999999	6.5681574248767545	gpd1 ish1-GFP		88.25268	6.98027	7.909414195693547	ish1-GFP
87.89594	6.7281699999999995	7.6546994093242535	cut11-GFP		103.82036	7.37467	7.103298428169581	gpd1 ish1-GFP		70.48021999999999	5.48439	7.781459819506809	ish1-GFP
99.00231	8.0938	8.175364797043624	cut11-GFP		79.10425	6.22551	7.8700069844540606	gpd1 ish1-GFP		108.35023000000001	6.97772	6.439967870857311	ish1-GFP
113.84324	9.04044	7.941130277037091	cut11-GFP		74.71803	6.09502	8.157361750570779	gpd1 ish1-GFP		72.60718	5.74563	7.913308298160045	ish1-GFP
127.64336999999999	8.40756	6.586758090138173	cut11-GFP		79.63906	6.31861	7.934058990651069	gpd1 ish1-GFP		102.38759	6.77734	6.619298295818858	ish1-GFP
143.36565	11.22446	7.82925338112721	cut11-GFP		75.56029000000001	5.35458	7.086500065047393	gpd1 ish1-GFP		95.11678	6.83995	7.1911076047780425	ish1-GFP
96.20425	7.91608	8.228409867547432	cut11-GFP		83.27681	6.27726	7.537824755775348	gpd1 ish1-GFP		163.7845	12.16651	7.428364710946396	ish1-GFP
87.2107	7.773210000000001	8.913137952109087	cut11-GFP		81.26984	6.09309	7.497356953083702	gpd1 ish1-GFP		95.23857	6.787660000000001	7.127007471867754	ish1-GFP
92.72491	7.9161	8.537188119136488	cut11-GFP		80.71211	5.77635	7.156732738123189	gpd1 ish1-GFP		101.71681	7.55593	7.428398511514469	ish1-GFP
88.79393	7.0069	7.891192562374477	cut11-GFP		88.90066999999999	6.41069	7.211070512741919	gpd1 ish1-GFP		145.66978999999998	11.75721	8.071138154314633	ish1-GFP
118.38311000000002	8.52843	7.204093556927166	cut11-GFP		73.38359	5.59483	7.6240887097510495	gpd1 ish1-GFP		156.09176000000002	14.60237	9.354990936100661	ish1-GFP
93.42315	6.13103	6.562645340046873	cut11-GFP		72.96011999999999	5.50443	7.54443660454506	gpd1 ish1-GFP		86.92902	7.1778	8.257081467155619	ish1-GFP
91.38704	6.93548	7.589128611671852	cut11-GFP		73.74677	6.645810000000001	9.01166247687865	gpd1 ish1-GFP		76.58779	6.11963	7.99034676415131	ish1-GFP
113.03121000000002	7.97659	7.056980103106035	cut11-GFP		70.70268	4.99604	7.066266794978635	gpd1 ish1-GFP		84.65575	6.22227	7.3500854933067155	ish1-GFP
187.23595	14.316139999999999	7.6460423332164575	cut11-GFP		92.92853000000001	6.5906199999999995	7.092138442306145	gpd1 ish1-GFP		72.31558000000001	6.66878	9.221774892768611	ish1-GFP
154.15445	11.56892	7.504759025769285	cut11-GFP		94.87495	7.355739999999999	7.753089724948471	gpd1 ish1-GFP		79.91401	6.227930000000001	7.793289311849073	ish1-GFP
91.68428	7.306780000000001	7.969501423799151	cut11-GFP		102.22039000000001	7.434260000000001	7.2727760087786795	gpd1 ish1-GFP		81.50769	7.257039999999999	8.903503460839094	ish1-GFP
98.7659	8.40397	8.508979313710501	cut11-GFP		78.50480999999999	5.91239	7.531245537693806	gpd1 ish1-GFP		152.10228999999998	11.8093	7.764051415662447	ish1-GFP
84.90418000000001	7.590330000000001	8.939877871737293	cut11-GFP		80.90109	6.0753	7.50954035353541	gpd1 ish1-GFP		185.23393000000002	13.728270000000002	7.411314978848638	ish1-GFP
95.37879000000001	7.174239999999999	7.5218400233427145	cut11-GFP		57.943169999999995	4.446	7.673035493225518	gpd1 ish1-GFP		68.68998	5.10586	7.433194768727549	ish1-GFP
96.50837	8.72429	9.039930940704936	cut11-GFP		63.441680000000005	5.1651	8.141493100434918	gpd1 ish1-GFP		108.61984	9.09327	8.371647389648153	ish1-GFP
89.67965	7.36445	8.211952209893772	cut11-GFP		106.07088	8.0638	7.6022750070518885	gpd1 ish1-GFP		126.08066000000001	11.18389	8.870424694794586	ish1-GFP
84.38704	5.96159	7.064580058738877	cut11-GFP		111.06205	8.41258	7.574666594034596	gpd1 ish1-GFP		146.7848	10.17002	6.928523934358326	ish1-GFP
88.05764	6.9429300000000005	7.884528815444066	cut11-GFP		70.97628	5.6534699999999996	7.965294884431811	gpd1 ish1-GFP		123.4667	8.38547	6.791685531402394	ish1-GFP
92.10288	8.253160000000001	8.960805568729231	cut11-GFP		76.70711999999999	5.794630000000001	7.5542270391588175	gpd1 ish1-GFP		78.72952	5.03972	6.401309191266503	ish1-GFP
93.05644000000001	6.762639999999999	7.267245555492988	cut11-GFP		72.10906	5.4833099999999995	7.604190097610481	gpd1 ish1-GFP		80.66427	6.10727	7.571220814370476	ish1-GFP
69.5968	6.50665	9.34906489953561	cut11-GFP		82.29696	6.66675	8.100846009378719	gpd1 ish1-GFP		147.25625	11.39229	7.736371121769024	ish1-GFP
83.53406	5.09926	6.104408189904813	cut11-GFP		94.27346999999999	7.93285	8.414721554218808	gpd1 ish1-GFP		75.07901	6.01904	8.016941086463447	ish1-GFP
83.71146999999999	5.9054	7.054469357663891	cut11-GFP		91.70156	7.5025699999999995	8.181507490167016	gpd1 ish1-GFP		80.43738	5.07483	6.3090443771291405	ish1-GFP
74.43899	6.49597	8.72656923475184	cut11-GFP		76.35356999999999	6.81015	8.919229316978893	gpd1 ish1-GFP		64.44466	4.11914	6.391747586223591	ish1-GFP
80.92071999999999	7.3083100000000005	9.031444604051968	cut11-GFP		107.40848999999999	8.43621	7.854323247631544	gpd1 ish1-GFP		131.04488	9.52712	7.270119977216965	ish1-GFP
165.73282	12.20546	7.364540107384886	cut11-GFP		97.53866	7.714360000000001	7.909028071535944	gpd1 ish1-GFP		118.86111000000001	8.40886	7.0745258899231205	ish1-GFP
117.12185	8.31363	7.098274147821265	cut11-GFP		86.16636	6.96282	8.080670925405228	gpd1 ish1-GFP		112.04293999999999	8.476289999999999	7.565215621796428	ish1-GFP
138.60235	10.55086	7.612324033466964	cut11-GFP		72.84042	6.36175	8.73381839368856	gpd1 ish1-GFP		83.74459	5.0258400000000005	6.00139065699647	ish1-GFP
70.7474	5.71477	8.077710276278705	cut11-GFP		72.23956	6.72695	9.312003007770258	gpd1 ish1-GFP		87.95042	6.780010000000001	7.708900082569249	ish1-GFP
166.12191	14.461770000000001	8.705516328339833	cut11-GFP		92.51436	7.68618	8.308094008324762	gpd1 ish1-GFP		73.34039	5.417669999999999	7.387020985298823	ish1-GFP
129.37861	9.731539999999999	7.521753402668338	cut11-GFP		107.36211999999999	7.334460000000001	6.83151562208347	gpd1 ish1-GFP		77.14705	5.14401	6.667798703903779	ish1-GFP
75.45477	6.0988	8.082722934547412	cut11-GFP		99.59951	7.21554	7.244553713165858	gpd1 ish1-GFP		73.35816	4.5862	6.251792574950081	ish1-GFP
83.69525	6.65447	7.9508335299793	cut11-GFP		106.61233	8.98076	8.423753612738789	gpd1 ish1-GFP		110.0456	8.82024	8.015077386101762	ish1-GFP
114.11941000000002	6.72615	5.8939579165367215	cut11-GFP		85.37385	7.276389999999999	8.522972783820805	gpd1 ish1-GFP		90.43937	7.677230000000001	8.488814108280499	ish1-GFP
90.43908	6.81457	7.534983770290453	cut11-GFP		72.25685	6.06444	8.392892853757118	gpd1 ish1-GFP		126.67428999999998	9.67405	7.636948271034321	ish1-GFP
81.0329	7.073410000000001	8.729059431416129	cut11-GFP		70.4408	6.00234	8.521112764193479	gpd1 ish1-GFP		85.22180999999999	7.54953	8.858683006145963	ish1-GFP
135.78869	9.6562	7.111196079732414	cut11-GFP		75.24698000000001	5.23464	6.956611414836847	gpd1 ish1-GFP		100.51115	7.3648	7.327346269543229	ish1-GFP
108.68032	9.176210000000001	8.443304178714234	cut11-GFP		74.60045	4.6761	6.268192752188492	gpd1 ish1-GFP		75.32829	5.70688	7.5760116152908825	ish1-GFP
108.12321999999999	9.12674	8.441054567187328	cut11-GFP		73.81786	5.60543	7.593595912967404	gpd1 ish1-GFP		68.55672	6.1348199999999995	8.948531960105441	ish1-GFP
71.10436	7.05041	9.9155804229164	cut11-GFP		81.30236	6.103190000000001	7.5067808609737785	gpd1 ish1-GFP		136.31715	9.89591	7.259475421837972	ish1-GFP
84.97112	6.850110000000001	8.061692019594423	cut11-GFP		76.5815	4.95627	6.471889424991676	gpd1 ish1-GFP		122.77808	9.32037	7.59123289759866	ish1-GFP
77.62581	5.9974099999999995	7.726051425421518	cut11-GFP		97.35158	6.634	6.814475943790538	gpd1 ish1-GFP		88.70470999999999	6.978680000000001	7.867316177461153	ish1-GFP
117.53441000000001	9.4441	8.035178804232734	cut11-GFP		89.61428000000001	6.902589999999999	7.702555887298318	gpd1 ish1-GFP		124.71735	9.08654	7.285706439400773	ish1-GFP
95.51809	7.5765	7.9320053405590505	cut11-GFP		102.80483000000001	8.00809	7.789604826932741	gpd1 ish1-GFP		121.38118	9.19111	7.572104670592261	ish1-GFP
107.14343000000001	7.17237	6.694176208471204	cut11-GFP		98.55083	7.61747	7.729483353920003	gpd1 ish1-GFP		110.40893999999999	7.7164399999999995	6.98896303143568	ish1-GFP
112.0123	9.74429	8.699303558627044	cut11-GFP		67.51996	4.6308	6.858416385317764	gpd1 ish1-GFP		121.62653	9.726989999999999	7.997424575049537	ish1-GFP
131.87462	9.169139999999999	6.952922404629487	cut11-GFP		58.366969999999995	4.03867	6.919444336411501	gpd1 ish1-GFP		117.20741000000001	8.18416	6.982630193773584	ish1-GFP
182.42856	12.42581	6.811329322557827	cut11-GFP		88.69869	7.006530000000001	7.899248568383592	gpd1 ish1-GFP		130.15986	9.85567	7.571973417918549	ish1-GFP
151.79336999999998	10.21393	6.728838025007285	cut11-GFP		96.18021999999999	6.8108699999999995	7.081362467251583	gpd1 ish1-GFP		134.17076	11.48584	8.560613355696873	ish1-GFP
155.05387	10.548969999999999	6.803422578230392	cut11-GFP		84.93798000000001	6.7951	8.000072523504796	gpd1 ish1-GFP		136.6816	10.97889	8.032456453538735	ish1-GFP
93.6868	6.86648	7.329186182044856	cut11-GFP		85.3227	6.07016	7.114355265363144	gpd1 ish1-GFP		136.14531000000002	8.85994	6.507708565208745	ish1-GFP
115.00176	7.80202	6.784261388695269	cut11-GFP		72.63434000000001	6.50891	8.961202098070967	gpd1 ish1-GFP		128.74195	9.05631	7.034467009393596	ish1-GFP
118.79876000000002	7.91017	6.658461754988014	cut11-GFP		68.0716	5.89382	8.658265708459915	gpd1 ish1-GFP		134.64893999999998	9.00663	6.688972078057207	ish1-GFP
139.58392	9.688939999999999	6.941300975069334	cut11-GFP		80.76874000000001	5.57247	6.8992904928317556	gpd1 ish1-GFP		117.5517	8.48733	7.220082738063338	ish1-GFP
93.13986	6.2371099999999995	6.696499221708084	cut11-GFP		74.17149	5.28796	7.129370058495521	gpd1 ish1-GFP		84.81369000000001	6.59369	7.77432275379128	ish1-GFP
71.02023	5.771	8.125853718018092	cut11-GFP		78.16983	5.73383	7.335093347395024	gpd1 ish1-GFP		90.49259	6.20641	6.85847316338277	ish1-GFP
131.81971000000001	8.94963	6.789295773750374	cut11-GFP		87.92832	6.5439300000000005	7.442346220193905	gpd1 ish1-GFP		102.75515	8.75567	8.520906251414164	ish1-GFP
80.94734	7.2373899999999995	8.940862046856635	cut11-GFP		83.99099	6.2281	7.415200130394941	gpd1 ish1-GFP		88.40236999999999	6.5465800000000005	7.405434944787115	ish1-GFP
118.47173000000001	9.69552	8.183825795402836	cut11-GFP		78.20653	6.828069999999999	8.730818257759294	gpd1 ish1-GFP		101.01536	8.47408	8.388902440183355	ish1-GFP
132.05678	9.3515	7.081423611873619	cut11-GFP		113.82658	8.1145	7.128827027922652	gpd1 ish1-GFP		108.89587	8.9708	8.237961641704135	ish1-GFP
109.04354	8.78037	8.052168885933087	cut11-GFP		91.03849	6.13819	6.742411918299612	gpd1 ish1-GFP		85.76366999999999	5.80417	6.767632495204555	ish1-GFP
126.46021	8.93939	7.0689349638119365	cut11-GFP		78.53771	5.1237699999999995	6.523961546625181	gpd1 ish1-GFP		108.05878999999999	8.01469	7.41697181691559	ish1-GFP
127.17788	9.66345	7.5983732391198835	cut11-GFP		71.87156999999999	5.16843	7.191202307115317	gpd1 ish1-GFP		125.18472	9.49088	7.5815003620250145	ish1-GFP
89.06754000000001	7.2233600000000004	8.109980358725524	cut11-GFP		78.57726	6.00323	7.639907525408751	gpd1 ish1-GFP		125.27956	8.44563	6.741426933491784	ish1-GFP
107.60226000000002	7.58458	7.048718121719748	cut11-GFP		73.39423000000001	6.36608	8.673815366684819	gpd1 ish1-GFP		85.65286	6.4884699999999995	7.57531038660005	ish1-GFP
101.86074	7.607589999999999	7.468618429436109	cut11-GFP		80.30566999999999	5.79089	7.211059941346607	gpd1 ish1-GFP		96.03531	6.71813	6.995479058692059	ish1-GFP
96.6279	7.19176	7.442736518127788	cut11-GFP		74.54732	6.39268	8.575331749015257	gpd1 ish1-GFP		76.71875	6.47527	8.440270468431772	ish1-GFP
94.85708000000001	7.13386	7.520640525725648	cut11-GFP		68.20297	5.6941	8.348756659717312	gpd1 ish1-GFP		132.62267	9.1969	6.934636438853175	ish1-GFP
76.24186	6.548430000000001	8.58902183131419	cut11-GFP		93.02443000000001	7.2441699999999996	7.787384453739731	gpd1 ish1-GFP		117.3026	8.640039999999999	7.365599739477215	ish1-GFP
					81.79415999999999	7.0539	8.62396532955409	gpd1 ish1-GFP		137.18965	10.30814	7.513788394386895	ish1-GFP
					90.30228000000001	6.848489999999999	7.5839613351955215	gpd1 ish1-GFP		72.29252	5.22476	7.227248406889123	ish1-GFP
					99.58116	7.72242	7.754900625781021	gpd1 ish1-GFP		71.33949	4.55921	6.390864302506229	ish1-GFP
					108.26624	7.1242600000000005	6.580315341144202	gpd1 ish1-GFP		74.92718	5.49568	7.334694833036556	ish1-GFP
					65.47667	5.18254	7.915094032729521	gpd1 ish1-GFP		86.62066999999999	7.03561	8.12232230482632	ish1-GFP
					70.64765	5.772880000000001	8.171368757488748	gpd1 ish1-GFP		114.28988000000001	8.682160000000001	7.59661310345238	ish1-GFP
					68.38494	4.76926	6.974137873046317	gpd1 ish1-GFP		134.48265	10.19182	7.578538941640427	ish1-GFP
					72.76711999999999	5.64537	7.7581330688915555	gpd1 ish1-GFP		63.916669999999996	4.57924	7.164390760657588	ish1-GFP
					70.88011999999999	6.026730000000001	8.502708516859173	gpd1 ish1-GFP		61.799780000000005	5.19139	8.40033734747923	ish1-GFP
					93.74548	6.87752	7.3363750444288085	gpd1 ish1-GFP		124.09856	9.64156	7.769276291360673	ish1-GFP
					90.48088	6.239240000000001	6.895644693110854	gpd1 ish1-GFP		144.07306	10.567160000000001	7.334584272729407	ish1-GFP
					143.57295	9.8462	6.857977077158337	gpd1 ish1-GFP		118.35231999999999	9.14533	7.727208051350409	ish1-GFP
					85.80887	6.683439999999999	7.788751908747894	gpd1 ish1-GFP		83.06170999999999	7.36498	8.866877409578976	ish1-GFP
					93.92251999999999	8.11812	8.64342225911315	gpd1 ish1-GFP		85.53714000000001	7.4909300000000005	8.75751749473971	ish1-GFP
					67.10055	6.0906199999999995	9.076855554835243	gpd1 ish1-GFP		119.81821000000001	8.152339999999999	6.803924044600565	ish1-GFP
					63.09094	4.262519999999999	6.756152309666014	gpd1 ish1-GFP		73.46254	5.4355400000000005	7.399063522715115	ish1-GFP
					65.40975999999999	4.44111	6.789674813055423	gpd1 ish1-GFP		69.31642	5.09546	7.351014377257221	ish1-GFP
					109.79446999999999	7.6872300000000005	7.001472842849007	gpd1 ish1-GFP		85.37034	7.20937	8.44481818861211	ish1-GFP
					91.7021	7.35076	8.015912394590746	gpd1 ish1-GFP		90.47064	6.39099	7.064159157048076	ish1-GFP
					97.92566	7.690869999999999	7.853784186902595	gpd1 ish1-GFP		68.28518000000001	5.65552	8.282207061620104	ish1-GFP
					68.49944	6.1050699999999996	8.912583810904145	gpd1 ish1-GFP		69.67694	5.7605	8.267441136192263	ish1-GFP
					68.1788	4.52957	6.643663426167665	gpd1 ish1-GFP		109.88071000000001	10.39359	9.458976011349034	ish1-GFP
					66.68972	5.76624	8.646370085224529	gpd1 ish1-GFP		86.19218000000001	6.73291	7.811509118344611	ish1-GFP
					73.05851	5.93339	8.121422131384831	gpd1 ish1-GFP		85.67102	6.735810000000001	7.862413684347404	ish1-GFP
					71.49393	5.817080000000001	8.136466969993117	gpd1 ish1-GFP		95.3736	7.010110000000001	7.350157695630657	ish1-GFP
					72.27875	5.1287400000000005	7.095778496446051	gpd1 ish1-GFP		87.26778	7.306430000000001	8.372425653545902	ish1-GFP
					76.77705	4.50589	5.868798032745462	gpd1 ish1-GFP		66.98454	5.8408	8.719623960991596	ish1-GFP
					60.7185	4.95702	8.163936856147632	gpd1 ish1-GFP		69.50461	5.05135	7.267647426551995	ish1-GFP
					85.01209	5.79315	6.814501325634977	gpd1 ish1-GFP		83.63188000000001	5.49224	6.567160752574257	ish1-GFP
					116.64326000000001	8.02433	6.879377342505688	gpd1 ish1-GFP
					104.99691000000001	8.17963	7.790353068485538	gpd1 ish1-GFP
					115.94514	8.65703	7.4664880304599235	gpd1 ish1-GFP
					86.91593	6.07828	6.993286501105149	gpd1 ish1-GFP
					93.30709	5.9794599999999996	6.40836618096224	gpd1 ish1-GFP
					76.51175	5.34974	6.992050240649311	gpd1 ish1-GFP
					61.69511	4.72547	7.659391481756009	gpd1 ish1-GFP
					80.2839	6.289680000000001	7.83429803484883	gpd1 ish1-GFP
					58.677769999999995	4.4291	7.548173695080779	gpd1 ish1-GFP
					61.618159999999996	4.8815	7.922177487935375	gpd1 ish1-GFP
					63.2067	5.70901	9.032286134223112	gpd1 ish1-GFP
					67.3297	5.65458	8.39834426709164	gpd1 ish1-GFP
					66.10614	4.99945	7.56276194616718	gpd1 ish1-GFP
					70.50359	5.24806	7.443677690738867	gpd1 ish1-GFP
					67.73791	5.2470300000000005	7.746076015631425	gpd1 ish1-GFP
					71.84731	4.9148	6.840617971640135	gpd1 ish1-GFP
					67.44991999999999	4.83121	7.162662313016828	gpd1 ish1-GFP
					72.05371	5.52608	7.669389959240129	gpd1 ish1-GFP
					93.27533000000001	7.21667	7.73695466957876	gpd1 ish1-GFP
					99.88304000000001	8.21523	8.224849784307725	gpd1 ish1-GFP
					66.64518000000001	5.6373	8.458676231349362	gpd1 ish1-GFP
					137.67266	10.992519999999999	7.984533748385481	gpd1 ish1-GFP
					114.19039	8.431239999999999	7.383493479617679	gpd1 ish1-GFP
					92.32218	7.64946	8.2856145727928	gpd1 ish1-GFP
					115.71812	10.35463	8.948149174908822	gpd1 ish1-GFP
					118.97764	8.317219999999999	6.990574027186956	gpd1 ish1-GFP
					94.78623	7.03295	7.4198013783225685	gpd1 ish1-GFP
					93.8755	7.0804100000000005	7.542340653312101	gpd1 ish1-GFP
					72.15601	4.85377	6.726771616113475	gpd1 ish1-GFP
					80.47519	6.62142	8.227902288891768	gpd1 ish1-GFP
					108.73411000000002	8.539010000000001	7.853110675205784	gpd1 ish1-GFP
					109.69091	8.11063	7.394076683291259	gpd1 ish1-GFP
					68.40985	5.36984	7.849512899092746	gpd1 ish1-GFP
					116.96441000000002	9.538039999999999	8.154651487576432	gpd1 ish1-GFP
					76.88217	6.39114	8.31290271853669	gpd1 ish1-GFP
					120.34513999999999	8.85565	7.35854393455357	gpd1 ish1-GFP
					135.01891	10.00376	7.409154762099619	gpd1 ish1-GFP
					122.65303	9.49575	7.741961205524232	gpd1 ish1-GFP
					74.16619	5.55583	7.491054886330281	gpd1 ish1-GFP
					75.8971	5.79545	7.635930753612458	gpd1 ish1-GFP
					80.95087	6.05152	7.475546587701899	gpd1 ish1-GFP
					72.05812	5.43206	7.538442579406734	gpd1 ish1-GFP
					101.00728000000001	7.31005	7.237151619170421	gpd1 ish1-GFP
					69.44615999999999	5.63994	8.121312971084363	gpd1 ish1-GFP
					108.80431000000002	7.5509	6.939890524557344	gpd1 ish1-GFP
					100.43368000000001	6.916530000000001	6.886663915929398	gpd1 ish1-GFP
					102.78961	8.19865	7.976146616374943	gpd1 ish1-GFP
					121.10458	8.361089999999999	6.904024604189204	gpd1 ish1-GFP
					81.95217	5.80628	7.084961874713019	gpd1 ish1-GFP
					74.08748	6.2457400000000005	8.430223298187494	gpd1 ish1-GFP
					80.61932	6.08472	7.547471251307999	gpd1 ish1-GFP
					121.23087	9.52317	7.855400196336132	gpd1 ish1-GFP
					83.4705	6.59957	7.906469950461541	gpd1 ish1-GFP
					102.81193	6.68005	6.497349091686148	gpd1 ish1-GFP
					101.54388	7.24953	7.139307656945943	gpd1 ish1-GFP
					110.63836	8.98214	8.118468133475586	gpd1 ish1-GFP
					73.95208000000001	6.4589099999999995	8.733912555265515	gpd1 ish1-GFP
					96.21986	7.11725	7.396861728961153	gpd1 ish1-GFP
					85.19827	6.4436800000000005	7.563158266007046	gpd1 ish1-GFP
					97.84781	7.668130000000001	7.836792668124101	gpd1 ish1-GFP
					122.62558	8.55757	6.978617348843528	gpd1 ish1-GFP
					122.71101999999999	9.86111	8.036042728680766	gpd1 ish1-GFP
					93.35132	6.697439999999999	7.174445953201304	gpd1 ish1-GFP
					125.72867	9.76242	7.764672926230748	gpd1 ish1-GFP
					120.19792	6.89847	5.739259048742274	gpd1 ish1-GFP
					98.01138	6.9908	7.132641127999626	gpd1 ish1-GFP
					117.23255	7.559019999999999	6.447884994397886	gpd1 ish1-GFP
					97.08415	7.28608	7.504911975847757	gpd1 ish1-GFP
					82.09978000000001	6.32886	7.708741728662366	gpd1 ish1-GFP
					85.2031	6.06084	7.113403150824324	gpd1 ish1-GFP
					74.02728	6.38371	8.623456109693615	gpd1 ish1-GFP
					75.79723	6.02022	7.9425329923006425	gpd1 ish1-GFP
					83.31441	6.19624	7.437176834115491	gpd1 ish1-GFP
					107.19555	8.62598	8.046957173128924	gpd1 ish1-GFP
					81.81392	6.22206	7.605136143091543	gpd1 ish1-GFP
					82.01290999999999	6.927	8.446231209208404	gpd1 ish1-GFP
					69.36418	6.8417699999999995	9.863549169037967	gpd1 ish1-GFP
					91.07209	7.1261399999999995	7.824724347492189	gpd1 ish1-GFP
					77.93848	6.679989999999999	8.57084972660488	gpd1 ish1-GFP
					119.23746000000001	9.14846	7.672471386089572	gpd1 ish1-GFP
					114.98767	9.02177	7.84585860379639	gpd1 ish1-GFP
					111.42116000000001	8.72364	7.8294284496768825	gpd1 ish1-GFP
					102.02286	8.25435	8.090686734326013	gpd1 ish1-GFP
					127.00641	9.0239	7.105074460415029	gpd1 ish1-GFP
					130.64902	9.14073	6.996401503815336	gpd1 ish1-GFP
					88.44795	7.62015	8.615406009975358	gpd1 ish1-GFP
					92.2175	7.281280000000001	7.895768156803211	gpd1 ish1-GFP
					74.77589	6.08703	8.140364494491473	gpd1 ish1-GFP
					90.90606	7.43036	8.173668510108127	gpd1 ish1-GFP
					79.5624	7.011830000000001	8.812994580354541	gpd1 ish1-GFP
					74.76859	6.599660000000001	8.826781406470285	gpd1 ish1-GFP
					109.53482	7.98528	7.2901749416304344	gpd1 ish1-GFP
					79.49783000000001	5.95593	7.4919403460446645	gpd1 ish1-GFP
					81.7881	6.17932	7.555280046852782	gpd1 ish1-GFP
					88.07019	6.90406	7.839270018606751	gpd1 ish1-GFP
					110.20041	8.27374	7.507903101267953	gpd1 ish1-GFP
					88.30381	6.79673	7.696983856075973	gpd1 ish1-GFP
					72.30829	5.4897	7.592075542098977	gpd1 ish1-GFP
					76.00249000000001	5.78552	7.612276913559016	gpd1 ish1-GFP
					83.98706999999999	6.997739999999999	8.331925378513622	gpd1 ish1-GFP
					128.94181	8.75261	6.788030973041251	gpd1 ish1-GFP
					106.72464	8.287180000000001	7.765010966539688	gpd1 ish1-GFP
					108.91838	8.5853	7.8823243606818245	gpd1 ish1-GFP
					112.08058	7.64007	6.816586780689393	gpd1 ish1-GFP
					84.92886	6.6628	7.845154167852954	gpd1 ish1-GFP
					97.54672	6.806360000000001	6.9775385579340865	gpd1 ish1-GFP
					102.10797	7.167110000000001	7.019148456286029	gpd1 ish1-GFP
					109.95316000000001	7.47244	6.796021142093596	gpd1 ish1-GFP
					79.23558	6.1569	7.770372855224888	gpd1 ish1-GFP
					77.4995	5.66167	7.305427776953399	gpd1 ish1-GFP
					87.17225	6.44343	7.3916068473625485	gpd1 ish1-GFP
					71.78709	5.26207	7.330106290699343	gpd1 ish1-GFP
					71.97175	5.50566	7.649751464984525	gpd1 ish1-GFP
					66.83541	5.2175199999999995	7.806520525571699	gpd1 ish1-GFP
					85.41318000000001	7.069	8.276240271115064	gpd1 ish1-GFP
					108.04903	7.82994	7.246654597454508	gpd1 ish1-GFP
					100.73012	7.67253	7.616917362949632	gpd1 ish1-GFP
					92.82913	8.6312	9.29794343650533	gpd1 ish1-GFP
					88.86824	5.9974099999999995	6.748653962315446	gpd1 ish1-GFP
					77.94097	5.41279	6.944730095096328	gpd1 ish1-GFP
					89.75589000000001	7.051989999999999	7.856854853759457	gpd1 ish1-GFP
					74.0487	5.680280000000001	7.671005703003566	gpd1 ish1-GFP
					70.43916	4.8054	6.822057503241094	gpd1 ish1-GFP
					64.26388	4.61649	7.1836465523090105	gpd1 ish1-GFP
					113.55769	8.57627	7.552346300809747	gpd1 ish1-GFP
					93.6105	6.991739999999999	7.468969827102728	gpd1 ish1-GFP
					99.66033	7.65183	7.6779095553867815	gpd1 ish1-GFP
					117.8467	9.374419999999999	7.954758173118126	gpd1 ish1-GFP
					72.5416	6.100630000000001	8.409836562744688	gpd1 ish1-GFP
					85.19816999999999	6.050730000000001	7.101948316495532	gpd1 ish1-GFP
					77.45079	6.35621	8.20677232601501	gpd1 ish1-GFP
					97.89575	8.019639999999999	8.192020593335256	gpd1 ish1-GFP
					73.80856999999999	5.38025	7.289465166443411	gpd1 ish1-GFP
					105.61163	8.91884	8.444941149000352	gpd1 ish1-GFP
					108.38383999999999	7.9916	7.3734239347858495	gpd1 ish1-GFP
					85.34313	6.972460000000001	8.16991361812017	gpd1 ish1-GFP
					80.48057	7.31355	9.087348660676732	gpd1 ish1-GFP
					97.27524	7.5191	7.729716215554955	gpd1 ish1-GFP
					74.50735	6.33168	8.4980609295593	gpd1 ish1-GFP
					73.18777	5.56292	7.600887416025929	gpd1 ish1-GFP
					129.07961	10.59028	8.20445614919351	gpd1 ish1-GFP
					72.26505	5.70541	7.895116657360646	gpd1 ish1-GFP
					75.85915	5.0774099999999995	6.693207081808852	gpd1 ish1-GFP
					88.09475	5.96434	6.770369403398045	gpd1 ish1-GFP
					110.72527	8.53934	7.712187109591152	gpd1 ish1-GFP
					106.63858	6.59617	6.185538104502141	gpd1 ish1-GFP
					100.68911	6.859560000000001	6.812613598431848	gpd1 ish1-GFP
					115.35269	7.132160000000001	6.182916063769298	gpd1 ish1-GFP
					92.51331	5.93074	6.41068836473368	gpd1 ish1-GFP
					119.03658	9.198160000000001	7.727170925105545	gpd1 ish1-GFP
					102.01602	7.799239999999999	7.64511299303776	gpd1 ish1-GFP
					122.502	9.21289	7.520603745244976	gpd1 ish1-GFP
					74.09963	5.76845	7.784721732078823	gpd1 ish1-GFP
					73.32864000000001	5.60478	7.643370993925429	gpd1 ish1-GFP
					86.87011	7.933210000000001	9.13226655290295	gpd1 ish1-GFP
					116.01973000000001	8.3165	7.168177343629398	gpd1 ish1-GFP
					89.49396	6.754639999999999	7.547593156007398	gpd1 ish1-GFP
					108.15243999999998	6.5457	6.052290637178413	gpd1 ish1-GFP
					119.67756999999999	8.0606	6.735263759115432	gpd1 ish1-GFP
					100.34733	7.91047	7.88308966466771	gpd1 ish1-GFP
					92.21223	6.47874	7.0259010111782345	gpd1 ish1-GFP
					132.0281	10.8614	8.226582068514203	gpd1 ish1-GFP
					150.86194	8.85114	5.867046386915082	gpd1 ish1-GFP
					88.61176	5.89695	6.654816471312612	gpd1 ish1-GFP
					105.43632	8.193769999999999	7.771297404917014	gpd1 ish1-GFP
					120.40163999999999	9.40357	7.810167702034625	gpd1 ish1-GFP
					83.32223	5.61165	6.734877355058789	gpd1 ish1-GFP
					97.04353	7.0585	7.273540028892189	gpd1 ish1-GFP
					91.23566	6.15036	6.741179928988293	gpd1 ish1-GFP
					113.20606000000001	7.606789999999999	6.719419437440009	gpd1 ish1-GFP
					96.2285	5.73252	5.957195633310298	gpd1 ish1-GFP
					81.20445	5.130330000000001	6.317794160295404	gpd1 ish1-GFP
					97.76399	6.20285	6.344718541049725	gpd1 ish1-GFP
					114.11842	7.4543800000000005	6.532144416300191	gpd1 ish1-GFP
					103.31336999999999	6.73548	6.5194659703773095	gpd1 ish1-GFP
					109.05228000000001	7.45362	6.834905239945464	gpd1 ish1-GFP
					100.75281	5.8774	5.833484942008068	gpd1 ish1-GFP
					80.72966	4.78939	5.932627487840281	gpd1 ish1-GFP
