# Supplementary material for: Control of nuclear size by osmotic forces in Schizosaccharomyces pombe
Source: eLife. 2022 Jul 20;11:e76075. doi: 10.7554/eLife.76075 (PMC9410708; doi:10.7554/eLife.76075)
Supplement: Figure 2—figure supplement 1—source data 2. — Related to Figure 2—figure supplement 1. [file elife-76075-fig2-figsupp1-data2.xlsx]

## Sheet: Sheet1
WT	mean volumes	STD		gpd1D	mean volumes	STD
	1.0	0.0			1.0	0.0
	0.5793357901420392	0.03612384980253457			0.5272210360660943	0.03235039617903138
	0.6192181167086038	0.04542387831948972			0.533933552009041	0.02887423443436154
	0.6683441908508524	0.047922253687412854			0.5496422917393082	0.025525838311329783
	0.7178119539940986	0.04883656692053941			0.5539169707592646	0.03065891585675567
	0.7575927259334584	0.06418953695781225			0.5662062386057232	0.030057811705788938
	0.7934086850181753	0.06996712089762866			0.5750535830274562	0.036474946791440886
	0.8274242040243841	0.0721383663636454			0.5908999155189106	0.03021116291957822
	0.8626170574517112	0.06441552286566996			0.6027565928562054	0.032619864340232854
	0.8933422741721109	0.07136729194204494			0.6070412703138974	0.04412862634868793
	0.9270622204283301	0.06809665686227694			0.6173903839575575	0.03548180439566038
	0.9686423075840014	0.07519425330335458			0.6158690885362851	0.036871390131305956
	0.982448656036274	0.0779116469492613			0.6198692066026773	0.04319058606487385
	0.9970850392047943	0.07997522763583756			0.6262458339317692	0.03595480241595731
	1.029638255748088	0.0890178633603789			0.6364043617526175	0.052054041456062204
