# Supplementary material for: Control of nuclear size by osmotic forces in Schizosaccharomyces pombe
Source: eLife. 2022 Jul 20;11:e76075. doi: 10.7554/eLife.76075 (PMC9410708; doi:10.7554/eLife.76075)
Supplement: Figure 2—figure supplement 1—source data 3. — Related to Figure 2—figure supplement 1. [file elife-76075-fig2-figsupp1-data3.xlsx]

## Sheet: Sheet1
gpd1D	Time	Vol Cell 1	Vol Cell 2	Vol Cell 3	Vol Cell 4	Vol Cell 5	Vol Cell 6	Vol Cell 7	Vol Cell 8	Vol Cell 9	Vol Cell 10
Cell volume	0	124.13401999999999	148.64445	142.46178999999998	156.07824	174.56534	131.56503999999998	116.92626000000001	113.50063999999999	134.47991000000002	168.35555
	1	91.56413	113.60632	100.43795	114.98066999999999	124.38133	101.47623	83.16386999999999	82.49119	101.00197	123.28955
	2	95.2544	111.39645	102.20206999999999	118.41049	127.13301000000001	98.63217	87.51008	84.32878000000001	101.13611999999999	125.87845
	3	100.8202	117.6748	104.15668000000001	116.03922	134.68737	102.37919000000001	94.27503	87.75783	107.8633	128.66576
	4	103946	120.46082	105.66343	122.78211999999999	134.45096999999998	105.98532	94.33107	90.21104	105.62513999999999	130.86793
	5	109.77521999999999	118.1235	110.45941	124.6391	132.86809	104.75569	91.73217	89.01569	106.40576999999999	134.51418999999999
	6	107.28294	123.17138	113.99605	128.16441	135.11067	106.86171999999999	97.10805	89.99659	108.44389	135.44892
	7	112.91136999999999	124.42631999999999	111.12471000000001	129.92837	136.61396000000002	109.39888	93.70652	92.4109	109.21466000000001	134.5422
	8	113.21913	131.3193	114.99258999999999	134.44332	133.41179	111.32956999999999	96.2926	93.09384	113.60728999999999	142.05622
	9	113.21768	129.28942	119.26952	137.30142	136.8696	111.04488	98.35743000000001	98.35104	114.7845	141.66597
	10	121173	134.89893999999998	116.74011000000002	133.41783	140.18562	114.39092	101.75338	100.09569	112.18073000000001	143.91858
gpd1D	Time	Vol Nucl 1	Vol Nucl 2	Vol Nucl 3	Vol Nucl 4	Vol Nucl 5	Vol Nucl 6	Vol Nucl 7	Vol Nucl 8	Vol Nucl 9	Vol Nucl 10
nucleus volume	0	9.11662	11.43264	10.15965	11.43798	12.135810000000001	10.39201	9.0247	9.90911	10.5707	13.324710000000001
	1	6.36996	7.937069999999999	7.36309	7.633380000000001	8.60133	7.60688	6.64752	7.85203	7.420889999999999	8.96689
	2	6.553910000000001	7.8135699999999995	7.677960000000001	7.88974	8.49323	7.707260000000001	5.98227	7.0079199999999995	8.57605	10.31638
	3	7.46585	8.24346	8.19534	8.48992	8.92653	8.14073	7.5394	7.400869999999999	8.04371	9.73503
	4	7.19095	8.32775	8.22461	8.86813	8.64568	8.1222	6.7485	7.67973	8.33473	10.60646
	5	7.657089999999999	8.34938	7.8403	8.57606	8.37384	7.60693	6911	8.14838	7.98066	10.874319999999999
	6	7.229310000000001	8.709810000000001	8.25262	8.72303	9.05563	7.72354	6.53529	8.08407	7.784739999999999	10.760019999999999
	7	7.2153	9.58522	8.64703	8.85426	8.98	8.66898	7.47566	8.37669	8.19212	10.57558
	8	8.3626	9.25254	8.70256	9.40285	9.83878	9.192730000000001	7.71966	8.555530000000001	7.95063	11.10111
	9	7.889819999999999	9.12606	9.04371	9.668239999999999	9.65354	9.22258	7.52843	8.34873	8.386460000000001	11.169960000000001
	10	7.92926	9.13401	9.01929	10.373619999999999	10.15903	9.04568	7.63697	8.49145	8.34174	11.61099
WT	Time	Vol Cell 1	Vol Cell 2	Vol Cell 3	Vol Cell 4	Vol Cell 5	Vol Cell 6	Vol Cell 7	Vol Cell 8	Vol Cell 9	Vol Cell 10	Vol Cell 11	Vol Cell 12
cell volume	0	123.40618	83.00891	105.40335	84.40531999999999	113.5689	175.69446000000002	133.09055	156.69158000000002	85.86289000000001	94.77391	103.67349	99.65867
	1	96.8117	65.43785	81.04581999999999	65.69563000000001	85.72366	133.2776	98.94465	118.50646	64.85131	71.14416999999999	77.87376	72.11576
	2	106.55795	66.59765	89.55158	71.26241999999999	93.98642	143.78843999999998	107.53488	129.76998	72.3566	79.19385	83.86234	78.53730999999999
	3	106.34926000000002	70.39969	91.94596999999999	76.02789	98143	148.01232	115.33323	141.11147	81.56626	82.91938	88.20375	81.86077
	4	113.4417	75.3394	100.75348000000001	79.00157	104.69698000000001	164.28274	122.30175	143.80075	81.85005	84.98454	92.89201	89.8344
	5	119.9096	81.79678	100.76321	81.62204	108.24091000000001	163.33671999999999	126.91672	149.22216	86.82567	90.51884	97.26765	94.34623
	6	124.51341000000001	80.46398	106.12102	86.15562	111.56476	170.37012	131.53162	153.55285	89.70019	92.58034	101.73444	95.09898000000001
	7	132.41897	83.16683	110.47006	93.12808000000001	120.00594	179.30104	133.67314	154.93868	91.27518	94.49778	102.63418	97.41306
	8	134.26821	84.08910999999999	114.88905	90.23743	119.73388	182.8134	133.51568	160.5168	91176	95.88854	102.42126999999999	99.53018
	9	132.32966000000002	83996	115.6047	93.43704	121.88868000000001	188.41654	134.14056000000002	162.26038	95.32796	98.97482	102.89811	102.7019
	10	134.76157	89.28779	116.81376000000002	92.92978000000001	122.02828000000001	188.69105	130.4447	162.84193	104.66457	99.75184	103.58792	102.30484
WT	Time	Vol Nucl 1	Vol Nucl 2	Vol Nucl 3	Vol Nucl 4	Vol Nucl 5	Vol Nucl 6	Vol Nucl 7	Vol Nucl 8	Vol Nucl 9	Vol Nucl 10	Vol Nucl 11	Vol Nucl 12
nucleus volume	0	9.330810000000001	6.69285	7.091660000000001	7.18	10.30751	14.023279999999998	10.16582	11.91203	7.4847600000000005	7.18468	7.93205	7.935510000000001
	1	6.622389999999999	4.83354	5.5305800000000005	4.49627	6.926130000000001	9.97845	7.73845	8.27897	5.21523	5.203119999999999	6.08681	6.18139
	2	7.0998	6.41113	6.25601	5.48196	7.68918	10.79354	8.21873	9.023480000000001	6.01049	5.67874	6.13965	6.2721
	3	7.60773	6.36081	7.150739999999999	5.85625	8.05524	11.74831	8.37637	9.87425	6.245080000000001	6.01393	6.86924	6.33865
	4	8.135860000000001	6.10059	7.451280000000001	6.194369999999999	8.01	11.66048	9.619810000000001	10.32958	6.898789999999999	6.64133	7.38895	6.4895
	5	8.14294	6.825830000000001	7.508210000000001	6.9587699999999995	8.39584	12.003810000000001	9.965810000000001	10.79619	7.12016	6.72728	7.54316	7.83995
	6	9.07117	6.8601399999999995	8.12786	6.7509	9.14729	12.92591	9.33307	12.014330000000001	7.51174	7.002260000000001	7.570589999999999	7.317489999999999
	7	9.37321	7.12268	8.08505	7.84045	9.15129	12.76697	10.66433	11.87164	8.4308	7.16587	8.496089999999999	8.33959
	8	9.48531	7.35208	7.86304	7.49895	10.29164	13.986939999999999	10.64288	11.69358	8.132539999999999	7.184019999999999	8.08511	8.24927
	9	10.14296	6.9729	8.4126	7.60115	10.205630000000001	14.39112	10.3266	12.467419999999999	7.866810000000001	7.474710000000001	7.99452	8.32671
	10	9.93902	7.93027	8.53515	7.57097	10.16423	14.408320000000002	11.261239999999999	13.361220000000001	8.61309	7.64041	8.26657	8.56781
