# Supplementary material for: Control of nuclear size by osmotic forces in Schizosaccharomyces pombe
Source: eLife. 2022 Jul 20;11:e76075. doi: 10.7554/eLife.76075 (PMC9410708; doi:10.7554/eLife.76075)
Supplement: Figure 2—figure supplement 2—source data 1. — Related to Figure 2—figure supplement 2. [file elife-76075-fig2-figsupp2-data1.xlsx]

## Sheet: Sheet1
Volume Whole Cell	mCrim Intensity		Volume Protoplasts 0.4M	mCrim Intensity		Volume Protoplasts 1.0M	mCrim Intensity
68.84789	2705.85625		123.14623999999999	2745.2474		49.09957	3322.3798100000004
77.62356	2829.02564		111.87388	2829.05469		50.93397	3495.60897
88.52356999999999	2807.8125		88.43377	2962.97917		60.84599	3497.7628200000004
103.39647	2782.25806		74.43703000000001	2791.8489600000003		66.63681	3203.91026
93.34036	2731.98639		124.77853999999999	2570.6822899999997		45.99597	3484.16026
65.51954	2913.75676		139.70231	2677.17448		54.397819999999996	3307.60825
111.74925	2858.2934800000003		105.53693999999999	2717.46222		47.13126	3556.625
76.70073000000001	2820.58394		178.82716000000002	2629.79111		43.5128	3230.66964
80.69532	2757.9927		64.90333000000001	2860.88		48.3369	3182.5625
86.76465	2812.11679		100.88342	2886.91111		45.441	3131.1375
77.17936999999999	2783.83942		103.82683	2708.01333		41.66884	3434.9375
138.12849	2721.3795600000003		77.6928	2730.2051300000003		57.938159999999996	3386.5766399999998
98.18494	2729.90511		90.62212	2932.01923		42.062020000000004	3270.71635
111.78255	2787.51095		79.7553	2930.99359		42.54997	3325.4375
77.0717	2784.4087600000003		181.53355	2922.39286		40.89255	3386.3846200000003
78.18143	2828.71533		92.94341	2800.61607		48.47309	3251.3173100000004
105.90268	2800.6025600000003		61.89866	2929.67857		45.37472	3236.11607
106.95793	2733.52555		129.8968	2770.66667		56.867369999999994	3207.75893
71.03675	2597.74453		107.01045	2753.72436		48.6965	3344.49107
78.16868000000001	2791.51095		101.58332	2816.48718		42.7179	3180.21429
67.71869000000001	2783.45985		94.08196	2777.3589699999998		47.26397	3286.86598
114.77103000000001	2706.8613100000002		57.44181	2753.82692		41.72059	3448.6185600000003
116.09223999999999	2697.9124100000004		78.34868	2814.74359		50.544290000000004	3599.6391799999997
75.19808	2743.46154		135.68864	2759.82051		48.5553	3368.81443
84.00914	2686.46795		101.56854	2679.7948699999997		41.62869	3238.03093
72.44339000000001	2870.94792		93.15248000000001	2922.6282100000003		43.65551	3455.27835
69.5797	2638.80208		83.77454	2783.7781600000003		23.31912	3168.79381
67.98116999999999	2713.30208		96.90644	2729.56655		39.906	3332.92308
77.03726	2783.35417		137.93767	2785.23208		33.339890000000004	3578.1958799999998
107.80456000000001	2768.39175		79.16863000000001	2884.87713		52.88879	3437.70536
82.25668	2626.48454		110.05378999999999	2930.83974		48.95302	3463.31884
103.09186	2626.3299		61.209340000000005	2891.08974		62.486380000000004	3300.60714
85.38176999999999	2707.5257699999997		93.16633	2903.6410300000002		44.14989	3237.4375
79.71615	2713.8762899999997		68.45366999999999	2854.3589699999998		48.80706	3540.4058
81.74856	2784.2577300000003		92.14931	2764.0		64.61426999999999	3204.6
134.44597	2756.41808		73.48405	2959.41026		71.8054	3226.82609
94.91161	2803.67949		133.73736	2763.72436		48.05165	3255.13393
115.66153999999999	2733.05128		140.19146	2800.6204399999997		50.584070000000004	3278.03571
75.65599	2669.73718		57.45819	2766.3065699999997		42.43295	3415.8125
92.19622	2749.1410300000002		58.76161	2878.23111		89.85448000000001	3427.1964299999995
68.69561	2776.17308		115.95183	2745.13462		73.42918	3410.8556700000004
97.14901	2844.80444		92.02104	2809.1025600000003		65.25188	3421.77564
84.67551	2723.3623199999997		100.26254	2836.86607		55.94145	3383.25641
99.64539	2697.09662		99.14193	2748.27215		34.09383	3167.70103
88.14891999999999	2576.8647300000002		79.88959	2833.40823		29.36375	3301.0618600000003
128.21696	2745.38462		84.83086	2835.32911		58.09956	3374.48454
125.02643	2709.59615		88.94364	2864.04808		41.60835	3470.17514
82.01234000000001	2655.03846		108.21385	2869.7909600000003		53.84433000000001	3353.4971800000003
68.72591	2812.3974399999997		142.14643999999998	2729.1581899999996		80.85075	3322.72596
93.95957	2733.11058		119.64941999999999	2753.29944		46.44619	3466.67232
89.11792	2887.04808		159.76716000000002	2660.32768		33.93342	3438.59322
70.37088	2692.85401		88.84877	2698.36444		40.32647	3422.15254
114.14666000000001	2801.8757100000003		62.87798000000001	2938.94667		34.961659999999995	3331.33333
115.6988	2721.0904		108.59718000000001	2612.28		50.21671	3316.84058
61.219319999999996	2828.4971800000003		99.24944	2868.57333		46.13455	3242.2247199999997
60.59534	2662.72881		141.90365	2911.9375		55.71657	3461.82474
82.94957	2730.7062100000003		96.19799	2895.57143		39.98615	3639.175
115.35105	2690.10169		85.16072	2903.9423100000004		64.09056	3539.1134
97.26184	2775.58757		105.29243999999998	2799.04871		38.59114	3444.92784
125.13675	2717.7514100000003		64.7095	2786.9726600000004		58.155190000000005	3402.28846
100.5725	2729.14286		103.33666	2875.55078		42.28484	3390.56701
98.70727	2716.32051		50.71568	2848.9407		47.812	3261.42029
68.44425	2779.86607		152.95317	2765.00641		75.86442	3302.0576899999996
67.27909	2768.67949		122.47814	2889.46429		35.62526	3316.37226
83.54756	2797.10219		106.75658	2936.5912399999997		32.31883	3369.46715
64.50709	2698.43796		97.07894	2759.47458		53.76116999999999	3134.7591199999997
70.33514	2691.94891		100.08189	2847.98305		36.92245	3308.33577
101.30245	2588.74453		75.74309000000001	2879.22328		39.795790000000004	3327.6204399999997
67.63566999999999	2817.54015		98.6563	2844.68889		82.35734000000001	3455.1605799999998
94.79149	2728.08029		90.11275	2790.13778		33.02129	3430.2125
149.17258	2712.6298100000004		98.3289	2820.8386100000002		39.97205	3518.5875
134.88917	2718.39904		90.64383000000001	2805.08173		70.06621	3344.825
63.49686	2632.89423		88.41394	2779.79327		65.05785	3258.0576899999996
97.12562	2759.40397		136.53556	2741.04778		61.9042	3661.23077
130.51384	2734.19868		91.24126	2771.64164		62.101130000000005	3198.15942
114.57166000000001	2617.84768		117.54343	2753.95312		45.55332	3259.23711
93.76061999999999	2862.43709		99.90607	2739.67411		48.659290000000006	3217.075
75.99696	2824.82781		158.51833	2844.29464		78.42278	3325.90179
124.15338	2847.0397399999997		61.04512	2713.50949		67.81232	3254.63918
79.34659	2798.0596		86.05709	2659.4375		47.22683	3134.89855
92.11061	2723.82781		160.82334	2919.67577		47.062059999999995	3365.8659799999996
77.85435	2834.06623		106.85736000000001	2763.53846		83.36496	3174.67308
72.69431999999999	2762.98675		68.7598	2803.81921		54.8298	3304.72464
72.8658	2846.43503		133.86126000000002	2852.0887399999997
97.7504	2750.1242899999997		121.692	2833.6587
93.60942	2739.0339		97.41329	2821.4198
95.26425	2824.2937899999997		40.23121	2803.97785
96.50766999999999	2825.87006		66.15629	2858.71751
107.25121999999999	2740.58192		126.76631	2919.79167
101.04404	2794.35593		95.2778	2901.91111
92.53458	2639.3615800000002		144.58114	2923.96429
130.41647	2728.5932199999997		64.5644	2778.40688
112.08768	2759.53107		106.56596	2863.43066
107.93141000000001	2819.69492		122.46207	2996.41071
58.8079	2757.9548		197.82033	2953.61092
96.1742	2668.12409		189.0492	2597.56111
169.07285	2770.1386899999998		156.12476999999998	2999.7514100000003
80.264	2867.48175		114.52133	2791.0664100000004
73.16405999999999	2904.0583899999997		55.54853000000001	2905.64407
83.50542	2653.0219
91.72989	2693.89051
62.97721	2903.40385
86.29404	2618.6962
81.78394	2664.02825
103.31585	2801.53107
61.91778000000001	2717.27119
66.98949	2662.82474
72.59461	2655.83212
