# Supplementary material for: Control of nuclear size by osmotic forces in Schizosaccharomyces pombe
Source: eLife. 2022 Jul 20;11:e76075. doi: 10.7554/eLife.76075 (PMC9410708; doi:10.7554/eLife.76075)
Supplement: Figure 2—figure supplement 2—source data 2. — Related to Figure 2—figure supplement 2. [file elife-76075-fig2-figsupp2-data2.xlsx]

## Sheet: Sheet1
dV Cell	dV Nucl	C end	C ini	N .10^-15 [mol]	V ini
29.51711000000003	2.222179999999998	0.2	0.4	35.42053200000004	70.48711999999998
34.824409999999986	2.250670000000002	0.2	0.5	41.789291999999975	96.44453
26.524449999999995	1.8151600000000006	0.2	0.6	31.829339999999988	59.32551
28.4129	2.4309600000000007	0.2	0.7	34.095479999999995	62.19196
31.44543	2.7754700000000003	0.2	0.8	37.734516	113.64132
15.257809999999992	1.4059	0.2	0.9	18.30937199999999	70.27948
14.303449999999984	2.1730600000000004	0.2	0.10	17.16413999999998	66.82882
25.017219999999995	3.0119099999999994	0.2	0.11	30.020663999999993	75.27638
25.77754999999999	2.7347899999999994	0.2	0.12	30.933059999999987	66.02831
43.52543	2.508320000000001	0.2	0.13	52.230515999999994	110.60146
29.69762999999999	1.9924199999999992	0.2	0.14	35.63715599999998	88.81773000000003
18.18683	1.7302100000000014	0.2	0.15	21.824195999999997	77.1567
35.018420000000006	6.79289	0.2	0.16	42.022104	83.04114
34.50653000000001	3.212910000000001	0.2	0.17	41.40783600000001	121.68905
42.36923	3.7209200000000004	0.2	0.18	50.843075999999996	76.49722
27.755049999999997	1.2474600000000011	0.2	0.19	33.306059999999995	66.68642
43.05319	4.46993	0.2	0.20	51.663827999999995	98.7568
41.52739000000004	3.58526	0.2	0.21	49.83286800000004	73.57186999999998
29.335549999999998	2.50901	0.2	0.22	35.202659999999995	75.82155
34.439520000000016	3.9805899999999994	0.2	0.23	41.327424000000015	70.47609
18.46687	0.9708399999999999	0.2	0.24	22.160243999999995	66.31307
20.25372	5.51469	0.2	0.25	24.304464	81.96149
14.094199999999987	1.2589499999999996	0.2	0.26	16.91303999999998	92.84549
11.544380000000004	0.0959399999999988	0.2	0.27	13.853256000000004	61.00771999999999
21.699160000000006	1.89431	0.2	0.28	26.038992000000007	77.63646
17.389539999999997	1.4196399999999993	0.2	0.29	20.867447999999992	69.73263
19.971990000000005	2.31499	0.2	0.30	23.966388000000006	64.11101
20.55042999999999	1.7863999999999995	0.2	0.31	24.660515999999987	92.2994
12.426270000000002	1.6946400000000015	0.2	0.32	14.911524000000002	55.26248
19.938030000000012	1.90857	0.2	0.33	23.92563600000001	74.75267
20.852580000000003	0.6016500000000002	0.2	0.34	25.023096000000002	67.94035
32.41167	2.5876	0.2	0.35	38.894003999999995	71.49401
33.325140000000005	3.0838099999999997	0.2	0.36	39.990168000000004	81.66511
29.15649999999998	2.1992599999999998	0.2	0.37	34.98779999999997	81.16353000000002
31.39116	1.2955299999999998	0.2	0.38	37.669391999999995	66.61204000000001
38.40680000000002	2.513860000000002	0.2	0.39	46.088160000000016	71.04786999999997
30.98912	1.4507200000000005	0.2	0.40	37.186944	59.57986
15.06702	0.6191199999999997	0.2	0.41	18.080423999999997	62.82669
9.21367	0.4001800000000002	0.2	0.42	11.056403999999999	48.2957
28.500930000000025	2.11782	0.2	0.43	34.20111600000003	60.89075
23.05895000000001	1.53545	0.2	0.44	27.67074000000001	81.01892
35.96318000000002	2.707650000000001	0.2	0.45	43.15581600000002	79.82486999999998
30.03669999999999	2.47576	0.2	0.46	36.04403999999998	62.39573000000001
26.326849999999993	2.42286	0.2	0.47	31.592219999999987	88.95753
23.1918	1.448599999999999	0.2	0.48	27.83016	93.1837
44.97197	3.3454800000000002	0.2	0.49	53.96636399999999	74.87083
36.210840000000005	2.90533	0.2	0.50	43.453008000000004	73.6249
37.60258	3.155499999999999	0.2	0.51	45.123096	87.12325
25.850210000000004	1.5859699999999997	0.2	0.52	31.020252000000003	91.84808
28.212820000000008	1.65583	0.2	0.53	33.855384	73.74367
-13.036739999999995	-0.6214900000000005	0.5	0.54	54.75430799999998	112.42642
-10.261430000000004	-0.9097500000000007	0.5	0.55	43.09800600000003	97.39552
-8.901410000000027	-0.53104	0.5	0.56	37.38592200000012	91.47543
-13.219430000000003	-1.92206	0.5	0.57	55.52160600000002	102.0167
-10.271920000000009	-1.042469999999998	0.5	0.58	43.14206400000004	83.88468
-14.603830000000002	-0.9394199999999993	0.5	0.59	61.336086000000016	92.45768
-11.594220000000007	-1.0664000000000016	0.5	0.60	48.69572400000004	106.87184
-13.236370000000022	-1.5604299999999984	0.5	0.61	55.592754000000106	86.14724
-11.670550000000006	-0.2524499999999996	0.5	0.62	49.01631000000003	95.2583
-10.911770000000004	-0.7525499999999994	0.5	0.63	45.82943400000002	100.53774
-11.66931000000001	-1.3167400000000011	0.5	0.64	49.01110200000005	104.46877
-10.820189999999997	-0.3554699999999986	0.5	0.65	45.444798	102.6197
-17.10695000000004	-1.00366	0.5	0.66	71.84919000000018	144.70958000000005
-12.915489999999991	-1.7113200000000015	0.5	0.67	54.24505799999997	89.68972
-12.194180000000003	-0.8833100000000016	0.5	0.68	51.21555600000002	99.72203
-10.93029	-1.445610000000003	0.5	0.69	45.90721800000001	95.38252
-13.648079999999993	-1.4363200000000003	0.5	0.70	57.32193599999998	112.15964
-18.135589999999993	-0.45594	0.5	0.71	76.16947799999998	131.47274
-15.108910000000023	-1.5132800000000008	0.5	0.72	63.4574220000001	102.42778
-12.954320000000024	-1.3805999999999985	0.5	0.73	54.40814400000011	100.72954
-12.167549999999991	0.02435000000000187	0.5	0.74	51.10370999999997	83.8436
-13.062430000000006	-1.352619999999999	0.5	0.75	54.86220600000003	94.5438
-8.424260000000004	-1.1521400000000002	0.5	0.76	35.38189200000002	81.42985
-12.962909999999994	-1.7317100000000005	0.5	0.77	54.44422199999998	102.48597
-2.231580000000008	-0.2260800000000014	0.5	0.78	9.372636000000035	72.73708
-5.861360000000005	-0.24078	0.5	0.79	24.617712000000026	80.24046
-3.1137099999999975	-1.0473499999999998	0.5	0.80	13.077581999999992	76.59472
-10.040199999999984	-0.2958499999999997	0.5	0.81	42.16883999999994	80.65496999999998
-6.62039	0.1294599999999999	0.5	0.82	27.805638000000005	68.08135
-6.845939999999999	-1.7048499999999995	0.5	0.83	28.752948	90.30994
-4.5005900000000025	-0.4432499999999999	0.5	0.84	18.902478000000013	68.58966
-13.439279999999997	-0.5268600000000019	0.5	0.85	56.444976	94.11286
-7.582170000000005	-0.8534099999999993	0.5	0.86	31.845114000000027	80.51188
-12.281349999999975	-0.22076999999999902	0.5	0.87	51.5816699999999	88.37626999999998
-2.437080000000009	-0.17857000000000145	0.5	0.88	10.23573600000004	78.15918
-4.801929999999999	-0.3766199999999982	0.5	0.89	20.168105999999998	102.15385
2.2218099999999765	-0.7936699999999997	0.5	0.90	-9.331601999999902	77.28038000000002
6.829009999999997	-0.5167400000000013	0.5	0.91	-28.681841999999993	69.36371
-9.666179999999997	0.20659000000000027	0.5	0.92	40.597955999999996	85.2041
-12.738479999999996	-0.0643799999999981	0.5	0.93	53.50161599999999	95.76745
-21.780379999999994	-0.22527999999999881	0.5	0.94	91.47759599999999	87.16073
-16.772540000000006	-1.7753700000000006	0.6	0.95	40.254096000000025	96.72763
-7.366969999999995	-1.4956500000000004	0.6	0.96	17.68072799999999	95.60458
-19.390380000000007	-1.1042900000000007	0.6	0.97	46.53691200000003	91.3284
-15.884280000000004	-1.2964899999999995	0.6	0.98	38.12227200000002	88.79756
-10.180999999999997	-0.6933399999999996	0.6	0.99	24.4344	71.51124
-13.672089999999997	-1.1829399999999985	0.6	0.100	32.813016	87.24842
-36.20606	-2.5438600000000013	0.6	0.101	86.89454400000002	93.92624
-11.842079999999982	-0.6193299999999997	0.6	0.102	28.42099199999996	76.67936999999998
-12.941969999999998	-1.5548700000000002	0.6	0.103	31.060728	85.91516
-13.730919999999998	-1.3985200000000004	0.6	0.104	32.954208	72.01415
-14.042810000000003	-1.2484299999999982	0.6	0.105	33.70274400000001	73.16037
-14.033929999999991	-0.6889200000000013	0.6	0.106	33.68143199999999	72.42911
-13.103179999999995	-1.4705999999999997	0.6	0.107	31.44763199999999	81.99257
-15.244439999999997	-0.33236999999999917	0.6	0.108	36.586656	105.16559
-13.097339999999988	-1.16568	0.6	0.109	31.43361599999998	73.03112
-14.395780000000002	-1.1821600000000005	0.6	0.110	34.54987200000001	104.9345
-7.200270000000003	-0.6875100000000005	0.6	0.111	17.28064800000001	52.83975
-11.530360000000002	-0.5853799999999998	0.6	0.112	27.672864000000008	60.98369
-10.523149999999994	-1.0771899999999999	0.6	0.113	25.255559999999992	73.46421
-10.749699999999997	-0.7770200000000003	0.6	0.114	25.79928	70.15464
-19.2256	-1.6605599999999985	0.6	0.115	46.14144	93.97492
-7.6695199999999915	-1.3496400000000004	0.6	0.116	18.406847999999982	53.84401999999999
-9.080239999999996	-1.3829599999999997	0.6	0.117	21.792575999999997	67.96069
-10.38373	-0.8223200000000004	0.6	0.118	24.920952000000007	61.48394
-19.948059999999998	-0.03462999999999994	0.6	0.119	47.875344000000005	94.88176
-12.656629999999993	-1.2182300000000001	0.6	0.120	30.37591199999999	74.87821
-6.007680000000001	-1.4893100000000006	0.6	0.121	14.418432000000005	63.33518
-17.135659999999973	-2.38621	0.6	0.122	41.12558399999994	89.24534
-17.988640000000004	-2.470979999999999	0.6	0.123	43.17273600000002	108.15258
-19.53792	-1.8225800000000012	0.6	0.124	46.89100800000001	104.85762
-12.508899999999997	1.1666800000000004	0.6	0.125	30.021359999999998	71.30426
-10.862389999999976	-0.6876300000000004	0.6	0.126	26.069735999999946	80.02665999999998
-12.133650000000003	-1.2843500000000008	0.6	0.127	29.120760000000015	70.1105
-16.89569999999999	-1.19677	0.6	0.128	40.54967999999999	85.57914
-18.881249999999994	-1.4116400000000002	0.6	0.129	45315	80.96938
-15.944120000000026	-1.6257499999999991	0.6	0.130	38.265888000000075	87.65209
-9.458440000000003	-1.32693	0.6	0.131	22.700256000000014	62.58511
-13.981560000000002	-1.0379199999999997	0.6	0.132	33.55574400000001	73.39843
-13.831980000000001	-1.3963599999999996	0.6	0.133	33.19675200000001	108.01099
-9.324879999999993	-0.7211400000000001	0.6	0.134	22.379711999999987	73.94951
-11.368060000000007	-1.0022100000000016	0.6	0.135	27.28334400000002	70.48603
-7.693069999999999	-1.2063699999999997	0.6	0.136	18.463368	57.49246
-9.905859999999997	-1.7916499999999997	0.6	0.137	23.774063999999996	73.09272
-18.241789999999995	-2.0443399999999974	0.6	0.138	43.780296	94.03174
-15.98939	-2.067879999999999	0.6	0.139	38.374536000000006	109.97867
-10.093119999999992	-0.9530300000000005	0.6	0.140	24.223487999999982	57.07236999999999
-19.11797	-1.826830000000001	0.6	0.141	45.883128000000006	92.84577
-8.71839	-2.00565	0.6	0.142	20.924136000000004	59.27109
-12.696709999999996	-1.452609999999999	0.6	0.143	30.472103999999998	80.64577
-11.312390000000008	-1.3334099999999998	0.6	0.144	27.149736000000022	76.8491
-16.474630000000005	-2.092010000000001	0.6	0.145	39.53911200000002	88.15303
-15.798320000000018	-1.2743000000000002	0.6	0.146	37.91596800000005	97.64643
-19.767200000000003	-1.3390199999999988	0.6	0.147	47.44128000000002	108.30925
-9.245019999999997	-1.93229	0.6	0.148	22.188047999999995	67.6184
-15.1875	-1.6671899999999988	0.6	0.149	36.45000000000001	80.66506
-20.951179999999994	-2.39234	0.6	0.150	50.28283199999999	111.80049
-20.258470000000003	-1.7364100000000011	0.6	0.151	48.620328000000015	122.39899
-10.575280000000028	-1.18372	0.6	0.152	25.38067200000007	73.34983000000003
-11.021720000000002	-1.23481	0.6	0.153	26.45212800000001	62.5114
-17.88637	-0.9808600000000016	0.6	0.154	42.92728800000001	109.69417
-13.820689999999999	-0.942400000000001	0.6	0.155	33.169656	107.57595
-8.740980000000015	0.01839999999999886	0.6	0.156	20.97835200000004	66.21725
-3.363339999999994	1.0780099999999981	0.6	0.157	8.072015999999987	71.38673
-8.210880000000003	1.0352100000000002	0.6	0.158	19.70611200000001	66.17785
-7.463529999999999	0.5400499999999999	0.6	0.159	17.912472	61.68955
-13.67874999999998	0.2849700000000004	0.6	0.160	32.82899999999996	85.22274
-15.203520000000012	-0.30756999999999834	0.6	0.161	36.488448000000034	105.4989
-12.977919999999997	-0.31834000000000007	0.6	0.162	31.147008	56.12562
-14.660160000000005	-0.32249000000000017	0.6	0.163	35.184384000000016	83.19447
-8.957999999999998	-0.1048600000000004	0.6	0.164	21.4992	70.73621
-11.282180000000011	-0.14410999999999952	0.6	0.165	27.07723200000003	80.77943
-10.34122	-0.15326999999999913	0.6	0.166	24.818928000000003	65.87996
-10.66061999999998	-0.7044199999999998	0.6	0.167	25.58548799999996	78.05790999999998
-18.57168	0.46667999999999754	0.6	0.168	44.572032000000014	94.19701
-20.56674000000001	-0.5420499999999997	0.6	0.169	49.36017600000003	124.84426
-14.316289999999995	-0.2921699999999996	0.6	0.170	34.359095999999994	82.50962
-15.617069999999998	-0.7357100000000001	0.6	0.171	37.480968000000004	86.6771
-9.248629999999991	0.55124	0.6	0.172	22.196711999999984	67.3307
-6.836500000000001	0.5221299999999998	0.6	0.173	16.407600000000006	62.69894
-13.277280000000005	-1.2384500000000003	0.6	0.174	31.86547200000002	106.77445
-12.041029999999992	0.17523	0.6	0.175	28.898471999999988	72.29032
-8.315129999999996	-0.4421299999999988	0.6	0.176	19.956311999999997	76.2173
-7.672280000000001	-1.1425299999999998	0.6	0.177	18.413472000000006	55.74584
-13.58868000000001	-1.6649600000000007	0.6	0.178	32.61283200000003	104.84645
-14.621969999999997	-1.0462499999999997	0.6	0.179	35.092728	73.30197
-19.57428	-0.5463000000000005	0.6	0.180	46.97827200000001	123.36493
-12.456640000000007	-0.8880599999999976	0.6	0.181	29.895936000000024	105.09676
-8.805329999999998	-0.035499999999999865	0.6	0.182	21.132792000000002	68.34402
-12.524630000000002	-0.83786	0.6	0.183	30.05911200000001	81.30624
-15.526940000000025	-0.8727799999999997	0.6	0.184	37.264656000000066	104.42331
-13.141360000000006	-0.7184400000000002	0.6	0.185	31.53926400000002	86.93902
-8.10857	0.9266899999999998	0.6	0.186	19.460568000000006	85.47835
-10.589840000000002	-0.33700999999999937	0.6	0.187	25.41561600000001	64.46138
-18.72878	-1.8981599999999998	0.6	0.188	44.94907200000001	114.63877
-18.64954999999999	-1.5398100000000001	0.6	0.189	44.75891999999998	114.44685
-11.00084000000001	-0.8982299999999999	0.6	0.190	26.402016000000028	85.31359
-11.586439999999996	-0.7856300000000003	0.6	0.191	27.807455999999995	91.87849
-9.430320000000023	-0.9653	0.6	0.192	22.632768000000063	75.05913000000002
-14.222380000000001	-1.09476	0.6	0.193	34.13371200000001	108.89199
-21.64596999999999	-0.5034900000000011	0.6	0.194	51.95032799999999	122.57981
-13.14391999999998	-0.33241999999999994	0.6	0.195	31.545407999999956	81.40621999999998
-5.533619999999999	-0.8643099999999997	0.6	0.196	13.280688000000001	70.83439
-21.033280000000005	-2.1206499999999995	0.6	0.197	50.479872000000015	102.57272
-15.575900000000004	-0.6789899999999998	0.6	0.198	37.38216000000002	83.83369
-16.47775999999999	-2.249199999999999	0.6	0.199	39.54662399999998	77.94089
-11.472470000000001	-1.290210000000001	0.6	0.200	27.53392800000001	63.54959
-14.201869999999978	-1.2865599999999997	0.6	0.201	34.08448799999995	71.59111999999998
-17.39586	-1.3994400000000002	0.6	0.202	41.75006400000001	83.10407
-17.251109999999997	-2.360850000000001	0.6	0.203	41.402664	85.7534
-10.68159	-0.8177300000000001	0.6	0.204	25.635816000000005	68.69707
-10.568440000000002	-0.3709199999999999	0.6	0.205	25.36425600000001	57.55673
-15.468289999999996	-1.2820400000000003	0.6	0.206	37.123895999999995	72.17327
-17.89743000000003	-1.0016500000000015	0.6	0.207	42.95383200000008	105.53475
-9.48986	-0.9580799999999998	0.6	0.208	22.775664000000006	69.04163
-16.145789999999998	-1.7990199999999996	0.6	0.209	38.749896	78.07624
-22.542969999999997	-1.9258400000000009	0.6	0.210	54.103128	109.15576
-20.272400000000005	-1.4498900000000017	0.6	0.211	48.65376000000003	82.54985
-16.686049999999994	-1.3737999999999992	0.6	0.212	40.046519999999994	67.85901
-21.214039999999997	-1.4946699999999993	0.6	0.213	50.913696	100.59579
-23.257829999999984	-2.22576	0.6	0.214	55.81879199999997	107.30052
-10.989069999999998	-2.00284	0.6	0.215	26.373768	56.20346
-15.290490000000005	-0.72994	0.6	0.216	36.69717600000002	64.23174
-9.469140000000003	-1.8821999999999983	0.6	0.217	22.725936000000008	60.15784
-8.807200000000002	-1.8826900000000002	0.6	0.218	21.13728000000001	62.14875
-16.961640000000024	-1.2956700000000003	0.6	0.219	40.70793600000006	77.23033000000002
-17.180250000000022	-1.6010999999999989	0.6	0.220	41.23260000000006	79.25119000000002
-13.857279999999996	0.01513999999999971	0.6	0.221	33.257472	66.63659
-11.062919999999998	-0.8976799999999994	0.6	0.222	26.551008000000003	60.18965
-12.06812	-0.9649000000000001	0.6	0.223	28.96348800000001	64.90675
-18.75294999999997	-2.636379999999998	0.6	0.224	45.00707999999993	104.05778
-13.98639	-1.9717399999999996	0.6	0.225	33.56733600000001	57.83852
-16.800780000000003	-1.7051299999999987	0.6	0.226	40.32187200000002	81.55793
-19.510689999999997	-2.514899999999999	0.6	0.227	46.825656	77.82024
-29.469240000000013	-1.7326299999999986	0.6	0.228	70.72617600000004	141.24868
-12.667229999999996	-1.19616	0.6	0.229	30.401351999999996	64.07342
-20.508159999999982	-1.8556200000000018	0.6	0.230	49.21958399999997	76.0067
-16.79961	-1.73196	0.6	0.231	40.31906400000001	72.35266
-17.849570000000007	-1.4686599999999999	0.6	0.232	42.83896800000003	81.78735
-22.515069999999994	-1.7194499999999984	0.6	0.233	54.036167999999996	111.32382
-21.663399999999996	-1.4505000000000008	0.6	0.234	51.99216	93.36143
-18.326360000000008	-2.8720600000000003	0.6	0.235	43.98326400000003	83.31792
-33.301959999999994	-4.805200000000001	0.6	0.236	79.924704	143.28687
-24.27579	-1.6791200000000002	0.6	0.237	58.261896000000014	91.48866
-18.268470000000022	-1.8320500000000006	0.6	0.238	43.84432800000006	96.28089
-26.092700000000022	-2.7585799999999994	0.6	0.239	62.62248000000006	130.29546000000002
-14.900300000000001	-1.3889100000000019	0.6	0.240	35.76072000000001	66.07181
-23.87522	-2.6614500000000003	0.6	0.241	57.30052800000001	101.49893
-23.08263000000001	-2.239860000000001	0.6	0.242	55.39831200000003	114.06031000000002
-10.578890000000015	-1.528150000000001	0.6	0.243	25.389336000000043	78183
-17.602710000000016	-1.5194	0.6	0.244	42.246504000000044	94.79538
-13.831160000000025	-0.93947	0.6	0.245	33.19478400000007	77.93144000000002
-15.200050000000005	-0.8172800000000002	0.6	0.246	36.48012000000002	67.78744
-18.02346	-2.5883499999999993	0.6	0.247	43.25630400000001	107.83886
-12.847690000000007	-2.216660000000001	0.6	0.248	30.83445600000002	64.67423000000001
-20.482590000000002	-2.9090299999999996	0.6	0.249	49.15821600000001	91.00126
-11.64199	-0.4745999999999997	0.6	0.250	27.940776000000007	60.68787
-23.153459999999995	-1.9514399999999998	0.6	0.251	55.568304000000005	92.29365
-18.79153000000001	-2.845230000000001	0.6	0.252	45.09967200000003	98.43174
-12.203609999999998	-1.17347	0.6	0.253	29.288664	70.72402
-19.76715999999999	-2.7067900000000007	0.6	0.254	47.44118399999998	100.23866
-13.159400000000012	-1.1435299999999993	0.6	0.255	31.582560000000036	67.92544000000001
-22.323400000000007	-2.0034599999999996	0.6	0.256	53.57616000000002	100.28848
-26.059219999999996	-2.4871100000000013	0.6	0.257	62.542128	103.45008
-13.048789999999997	-2.09588	0.6	0.258	31.317096	60.41972
-20.44001999999999	-2.0665700000000005	0.6	0.259	49.05604799999998	81.20976
-16.667960000000022	-1.4014499999999996	0.6	0.260	40.003104000000064	79.20083000000002
-14.431340000000006	-1.205499999999999	0.6	0.261	34.63521600000002	65.03193
-12.681849999999983	-0.9728300000000001	0.6	0.262	30.436439999999966	88.18049
-21.055090000000007	-2.635770000000001	0.6	0.263	50.53221600000003	87.95439
-16.845799999999997	-0.7298599999999995	0.6	0.264	40.42992	75.15065
-16.22045	-1.648880000000001	0.6	0.265	38.929080000000006	86.7635
-13.970310000000005	-1.0721599999999984	0.6	0.266	33.52874400000002	67.68949
-14.168660000000003	-1.5066300000000004	0.6	0.267	34.00478400000001	78.38431
-9.670150000000007	-2.73504	0.6	0.268	23.20836000000002	58.47473000000001
-18.02301	-1.8639100000000015	0.6	0.269	43.255224000000005	85.69596
-23.83023	-1.5004499999999998	0.6	0.270	57.19255200000001	101.86046
-15.609459999999991	-0.83697	0.6	0.271	37.46270399999999	77.15162
-22.317189999999997	-1.5951799999999983	0.6	0.272	53.561256	102.94568
-14.08805000000001	-1.9895500000000004	0.6	0.273	33.81132000000003	71.43148000000002
-11.986020000000003	-0.5608899999999997	0.6	0.274	28.766448000000015	60.00451
-10.85121999999999	-0.9301199999999996	0.6	0.275	26.042927999999986	53.17256999999999
-16.722760000000008	-1.7151400000000017	0.6	0.276	40.134624000000024	82.53265
-42.34164000000001	-1.9157899999999994	0.8	0.277	63.51246000000001	134.26221
-33.61712	-1.5868499999999992	0.8	0.278	50.42568	111.44538
-18.16326999999999	-1.5017799999999997	0.8	0.279	27.244904999999985	60.43391999999999
-48.40583000000002	-2.42858	0.8	0.280	72.60874500000003	138.1866
-23.23782000000002	-2.20615	0.8	0.281	34.85673000000003	70.71649000000002
-20.412480000000023	-1.3507700000000016	0.8	0.282	30.61872000000003	79.23378000000002
-22.821330000000025	-1.1236299999999995	0.8	0.283	34.23199500000003	77.38788000000002
-20.600459999999977	-1.6678100000000002	0.8	0.284	30.900689999999965	71.34215999999998
-33.478359999999995	-1.9042999999999992	0.8	0.285	50.217539999999985	101.85331
-17.880409999999998	-0.9803399999999995	0.8	0.286	26.820614999999997	58.56569
-35.142979999999994	-3.1744200000000005	0.8	0.287	52.71446999999999	111.39799
-16.573970000000003	-2.2340500000000003	0.8	0.288	24.860955	72.98791
-28.01491	-2.501970000000002	0.8	0.289	42.02236499999999	99.29356
-25.277410000000003	-2.45706	0.8	0.290	37.916115	73.32132
-23.118510000000015	-2.73086	0.8	0.291	34.677765000000015	90.17888
-15.956119999999991	-1.5995400000000002	0.8	0.292	23.934179999999987	53.55056999999999
-18.334489999999995	-1.5791099999999996	0.8	0.293	27.501734999999993	58.66226999999999
-30.130839999999992	-1.89051	0.8	0.294	45.19625999999999	94.43969
-29.507330000000003	-2.2201200000000005	0.8	0.295	44.260995	89.96348
-38.391890000000004	-0.78925	0.8	0.296	57.587835000000005	119.96736
-17.283179999999994	-1.8395299999999981	0.8	0.297	25.92476999999999	63.15445
-23.614779999999975	-2.64637	0.8	0.298	35.42216999999996	78.45125999999998
-17.887440000000005	-1.8165600000000017	0.8	0.299	26.831160000000004	65.40774
-21.4401	-2.76903	0.8	0.300	32.16015	71.15378
-15.45588	-1.91994	0.8	0.301	23.18382	58.47655
-19.443209999999993	-2.3831800000000003	0.8	0.302	29.164814999999987	68.80667
-21.569960000000002	-2.8593600000000006	0.8	0.303	32.35494	71.02463
-21.813299999999977	-1.7304600000000008	0.8	0.304	32.71994999999996	75.03350999999998
-26.005839999999985	-1.2233400000000012	0.8	0.305	39.008759999999974	83.74077
-19.96394	-2.2662099999999996	0.8	0.306	29.94591	72.40504
-29.909650000000013	-2.05272	0.8	0.307	44.86447500000001	94.07792
-20.089419999999997	-1.8852400000000018	0.8	0.308	30.134129999999992	61.82252
-27.769	-1.1379000000000001	0.8	0.309	41.65349999999999	84.30461
-18.855050000000006	-1.3433099999999998	0.8	0.310	28.282575000000005	70.37945
-18.18114	-0.3440500000000002	0.8	0.311	27.271709999999995	64.46995
-22.955969999999994	-1.3539999999999992	0.8	0.312	34.43395499999999	68.11975
-26.264270000000025	-1.7224500000000003	0.8	0.313	39.39640500000003	88.11263000000002
-23.239179999999998	-1.8083799999999992	0.8	0.314	34.85876999999999	67.76337
-35.572140000000005	-2.00125	0.8	0.315	53.35821	112.7137
-30.610439999999997	-2.89198	0.8	0.316	45.91565999999999	94.22645
-25.40883000000001	-3.84333	0.8	0.317	38.11324500000001	93.57745
-21.71501	-1.7340400000000002	0.8	0.318	32.572514999999996	75.15697
-25.850319999999996	-1.20683	0.8	0.319	38.77547999999999	63.28055
-36.95559	-4.233459999999997	0.8	0.320	55.433384999999994	109.77816
-42.24928000000001	-5.30745	0.8	0.321	63.37392000000002	131395
-24.2202	-0.7890099999999993	0.8	0.322	36.330299999999994	67.29553
-24.780379999999994	-2.07538	0.8	0.323	37.170569999999984	75.4922
-25.755190000000006	-2.8636099999999995	0.8	0.324	38.632785000000005	85.29004
-19.674310000000006	-1.3206699999999998	0.8	0.325	29.511465000000005	60.37192
-17.424850000000006	-2.5912900000000003	0.8	0.326	26.137275000000006	59.50768000000001
-16.965090000000004	-1.1342999999999996	0.8	0.327	25.447635000000005	57.50216
-20.619339999999994	-2.97527	0.8	0.328	30.929009999999987	62.71845
-21.59435	-2.1001600000000002	0.8	0.329	32.391524999999994	73.0458
-31.074560000000005	-2.4574300000000004	0.8	0.330	46.61184	101.42858
-18.600449999999995	-1.7973	0.8	0.331	27.900674999999993	64.76185
-22.27845	-2.1817900000000003	0.8	0.332	33.417674999999996	73.52068
-20.71454000000002	-1.4628200000000002	0.8	0.333	31.071810000000028	71.12673000000002
-21.189330000000005	-2.3265600000000015	0.8	0.334	31.783995000000004	59.98454
-22.350280000000005	-2.3077399999999995	0.8	0.335	33.525420000000004	74.25641
-18.69435	-2.0392699999999997	0.8	0.336	28.041524999999996	67.02799
-23.450049999999997	-2.8514300000000006	0.8	0.337	35.17507499999999	80.37191
-19.268140000000002	-2.59434	0.8	0.338	28.902210000000004	67.58274
-21.816899999999997	-2.40782	0.8	0.339	32.72534999999999	63.53153
-27.580799999999996	-1.3408699999999998	0.8	0.340	41.371199999999995	82.35637
-24.201029999999975	-2.1437600000000003	0.8	0.341	36.30154499999996	71.55015999999998
-23.635229999999986	-2.17084	0.8	0.342	35.452844999999975	82.57297
-23.37451000000003	-2.39615	0.8	0.343	35.061765000000044	75.86813000000002
-28.399629999999995	-2.9646100000000004	0.8	0.344	42.59944499999998	87.41779
-32.22149	-3.8780200000000002	0.8	0.345	48.332235	103.15661
-19.56259	-1.0492400000000002	0.8	0.346	29.343884999999997	61.51314
-24.53316000000001	-1.2315800000000001	0.8	0.347	36.799740000000014	77.92369000000002
-19.178510000000003	-2.02669	0.8	0.348	28.767765000000004	63.21969
-21.592619999999997	-2.2080299999999995	0.8	0.349	32.388929999999995	65.11007
-19.718660000000007	-2.2747399999999995	0.8	0.350	29.577990000000007	65.78468000000001
-25.165869999999998	-2.0555800000000004	0.8	0.351	37.748805	76.47227
-33.16793	-2.761850000000001	0.8	0.352	49.751895	102.58003
-21.69458999999999	-2.08695	0.8	0.353	32.54188499999998	80.72758
-18.326309999999992	-1.7903000000000002	0.8	0.354	27.48946499999999	64.98326999999999
-26.172720000000012	-1.8174099999999997	0.8	0.355	39.25908000000001	92.41858
-28.416490000000003	-2.71045	0.8	0.356	42.624735	90.75543
-21.352689999999996	-1.9589599999999998	0.8	0.357	32.02903499999999	68.29508
-28.389269999999996	-2.7827200000000003	0.8	0.358	42.58390499999999	88.6108
-26.463869999999993	-2.6001200000000004	0.8	0.359	39.695804999999986	84.95271
-38.68449	-4.482979999999999	0.8	0.360	58.02673499999999	105.20049
-30.617090000000005	-3.951030000000001	0.8	0.361	45.92563500000001	96.11681
-29.78053	-2.6394100000000007	0.8	0.362	44.67079499999999	94.57332
-42.474900000000005	-2.972369999999999	1.0	0.363	50.96988	98.75126
-42.32658	-3.00753	1.0	0.364	50.791896	92962
-30.64690000000001	-3.42302	1.0	0.365	36.776280000000014	82.92373
-29.330219999999997	-3.8027800000000003	1.0	0.366	35.19626399999999	78.7084
-34.58832	-2.58711	1.0	0.367	41.505984000000005	94.10975
-24.578369999999993	-2.76597	1.0	0.368	29.494043999999988	64.88821999999999
-33.91439	-2.05244	1.0	0.369	40.697268	74.97725
-32.99950000000001	-3.5102700000000007	1.0	0.370	39.59940000000002	86.54198000000002
-25.46275	-1.7772999999999999	1.0	0.371	30.5553	62.69863
-40.160070000000005	0.8883899999999993	1.0	0.372	48.192084	108.92974
-19.292440000000006	-2.3086999999999995	1.0	0.373	23.150928000000008	59.001430000000006
-21.518820000000005	-2.62197	1.0	0.374	25.822584000000006	62.16897
-26.588030000000003	-1.7554299999999996	1.0	0.375	31.905636000000005	68.14883
-23.151019999999995	-2.5233299999999996	1.0	0.376	27.78122399999999	64.84074
-25.23774000000001	-2.8237399999999986	1.0	0.377	30.28528800000001	66.72244
-24.064040000000006	-1.2975700000000003	1.0	0.378	28.876848000000006	63.48557
-37.401860000000006	-3.6116400000000004	1.0	0.379	44.88223200000001	97.69061
-37.503659999999996	-2.54669	1.0	0.380	45.004391999999996	84.20307
-27.801119999999997	-2.7703399999999996	1.0	0.381	33.361343999999995	72.7478
-30.783260000000006	-2.8365800000000005	1.0	0.382	36.93991200000001	78.4925
-29.753730000000026	-2.2259300000000004	1.0	0.383	35.704476000000035	77.77703000000002
-26.26131	-2.08495	1.0	0.384	31.513572000000003	65.41741
-38.872209999999995	-3.9856599999999993	1.0	0.385	46.646651999999996	107.33882
-45.28920999999997	-4.572099999999999	1.0	0.386	54.34705199999996	117.11334
-19.13727	-2.6785499999999995	1.0	0.387	22.964724000000004	56.54623
-34.64351	-1.8810800000000016	1.0	0.388	41.572212	81.5033
-28.670860000000005	-2.09223	1.0	0.389	34.405032000000006	69.98546
-28.480770000000007	-0.8145800000000002	1.0	0.390	34.17692400000001	66.05254000000001
-21.049119999999995	-2.82014	1.0	0.391	25.258943999999996	61.71946
-27.896199999999993	-2.5872900000000003	1.0	0.392	33.47543999999999	73.43892
-43.89457	-4.22302	1.0	0.393	52.673484	113.07812
-27.499389999999977	-1.4307000000000003	1.0	0.394	32.99926799999997	76.22355999999998
-28.135469999999998	-3.0238900000000006	1.0	0.395	33.762564	79.91878
-28.798630000000003	-1.6453799999999998	1.0	0.396	34.558356	75.9427
-36.52291999999998	-1.5943799999999992	1.0	0.397	43.827503999999976	88.18701999999998
-32.5711	-2.3671400000000005	1.0	0.398	39.08532	71.97498
-27.932970000000005	-3.1907499999999986	1.0	0.399	33.51956400000001	85.64086
-30.995869999999996	-1.2167900000000005	1.0	0.400	37.195043999999996	80.08251
-30.058940000000007	-3.9349100000000004	1.0	0.401	36.07072800000001	79.51089
-42.07839	-2.2252899999999993	1.0	0.402	50.494068	115.05143
-53.910569999999964	-6.97744	1.0	0.403	64.69268399999996	141.2557
-30.558549999999997	-2.49655	1.0	0.404	36.67025999999999	82.65911
-33.122080000000004	-2.3082600000000015	1.0	0.405	39.74649600000001	78.13155
-22.607480000000002	-2.90126	1.0	0.406	27.128976000000005	56.85625
