# Supplementary material for: Control of nuclear size by osmotic forces in Schizosaccharomyces pombe
Source: eLife. 2022 Jul 20;11:e76075. doi: 10.7554/eLife.76075 (PMC9410708; doi:10.7554/eLife.76075)
Supplement: Figure 2—source data 1. — Related to Figure 2, Figure 3B–D, Figure 3—figure supplement 1B-J. [file elife-76075-fig2-data1.xlsx]

## Sheet: Sheet1
	Before shock				After shock						Before shock				After shock
Whole Cells	Cell volume	Nuclear volume	N/C ratio	Conditon (paired)	Cell volume	Nuclear volume	N/C ratio	Conditon (paired)		Protoplasts	Cell volume	Nuclear volume	N/C ratio	Conditon (paired)	Cell volume	Nuclear volume	N/C ratio	Conditon (paired)
	113.07323000000001	9.365089999999999	8.28232288049081	YE	124.6205	9.54078	7.6558672128582375	-0.13M			70.48711999999999	5.4391099999999994	7.716459404214558	0.4M	100.00423	7.661289999999999	7.660965941140689	0.2M
	87.03772	6.429069999999999	7.386533103118969	YE	90.20808000000001	6.78215	7.5183398205570935	-0.13M			96.44453	7.622389999999999	7.903392758511031	0.4M	131.26894	9.87306	7.521246076947069	0.2M
	90.14732	7.38514	8.192301224262685	YE	96.67505	6.29021	6.506549518205576	-0.13M			59.325509999999994	5.0779	8.559387015804838	0.4M	85.84996	6.89306	8.029194189490596	0.2M
	78.95196	7.11873	9.016533598405916	YE	86.65063	6.11217	7.053809072132538	-0.13M			62.191959999999995	5.5655	8.948905935751181	0.4M	90.60486	7.996460000000001	8.825641361843063	0.2M
	113.8228	8.88385	7.804982832964925	YE	122.82633999999999	8.4382	6.870024784586108	-0.13M			113.64132	12.62477	11.109313056201742	0.4M	145.08675	15.40024	10.614504770421835	0.2M
	99.26151999999999	8.05927	8.119228881443686	YE	106.71668000000001	8.01554	7.511047007834201	-0.13M			70.27948	7.119839999999999	10.1307522480246	0.4M	85.53729	8.525739999999999	9.967278598608862	0.2M
	89.20319	6.97015	7.8137900673731515	YE	95.87082	6.39105	6.666314108922819	-0.13M			66.82882	6.07659	9.092768658791224	0.4M	81.13226999999999	8.24965	10.168148875903512	0.2M
	71.0251	5.5096	7.757257645536578	YE	77.96096	5.43312	6.969026548672566	-0.13M			75.27638	6.67594	8.868572054075925	0.4M	100.2936	9.68785	9.659489738128853	0.2M
	135.3248	10.296669999999999	7.608856617560121	YE	141.6277	11.08772	7.828779257165087	-0.13M			66.02831	6.94493	10.518109580572332	0.4M	91.80586	9.67972	10.543684248478256	0.2M
	91.46481	7.4472	8.142147783393415	YE	96.19783000000001	7.66235	7.965200462422073	-0.13M			110.60146	10.89223	9.848179219333995	0.4M	154.12689	13.40055	8.694491921558917	0.2M
	70.53386	5.45854	7.7388930649761685	YE	75.43989	6.20596	8.22636406283201	-0.13M			88.81773000000001	7.48353	8.425716351904061	0.4M	118.51536000000002	9.47595	7.995545893798068	0.2M
	96.10573000000001	7.045539999999999	7.331030106113339	YE	104.27628	7.671589999999999	7.356984733249019	-0.13M			77.1567	8.36845	10.846044478314909	0.4M	95.34353	10.09866	10.59186711463274	0.2M
	88.05725	6.90895	7.845975203631729	YE	91.93516	7.13474	7.760621725137586	-0.13M			83.04114	4.7329099999999995	5.699476187345212	0.4M	118.05956	11.5258	9.762699437470374	0.2M
	81.58025	5.95068	7.294265462535356	YE	86.77190999999999	6.15247	7.090393653890989	-0.13M			121.68905	8.70721	7.155294580736722	0.4M	156.19558	11.920119999999999	7.631534771982664	0.2M
	87.42058	6.4686	7.399401834213408	YE	93.70687	6.3218	6.74635701736703	-0.13M			76.49722	7.6398600000000005	9.987108028239458	0.4M	118.86645	11.36078	9.557600147055792	0.2M
	78.9819	6.17049	7.8125367964052534	YE	82.58365	5.40958	6.5504249327802775	-0.13M			66.68642	7.022819999999999	10.531109632215973	0.4M	94.44147	8.27028	8.75704285416142	0.2M
	81.88868000000001	6.7693	8.266466134269107	YE	87.82026	6.165780000000001	7.020908387199036	-0.13M			98.7568	8.82442	8.935506213243038	0.4M	141.80999	13.29435	9.374762666579414	0.2M
	85.64358	5.36564	6.265081398979351	YE	92.23451999999999	5.72063	6.202265702689188	-0.13M			73.57186999999999	7.44106	10.114001451913621	0.4M	115.09926000000002	11.02632	9.579835700073136	0.2M
	78.88372	5.91961	7.5042226710403614	YE	82.57165	6.29444	7.623003779142114	-0.13M			75.82155	5.71785	7.541193763514463	0.4M	105.1571	8.22686	7.823399466132101	0.2M
	122.37388999999999	8.01412	6.548880647661033	YE	124.15482	9.049760000000001	7.289092763373987	-0.13M			70.47609	8.64858	12.271651279178514	0.4M	104.91561000000002	12.62917	12.037455627432369	0.2M
	126.76461	8.760069999999999	6.910501282652941	YE	133.7798	9.84085	7.356005914196313	-0.13M			66.31307	6.52918	9.845992652730452	0.4M	84.77994	7.50002	8.84645589510915	0.2M
	100.99689000000001	7.3894899999999994	7.316552024522734	YE	104.07308	8.01109	7.6975621361451	-0.13M			81.96149	3.7090400000000003	4.525344768622435	0.4M	102.21521	9.22373	9.023833145771555	0.2M
	79.55771999999999	5.98498	7.522814882075555	YE	82.93431	6.75828	8.1489554805484	-0.13M			92.84549	7.00495	7.544739114414713	0.4M	106.93968999999998	8.2639	7.727626665085714	0.2M
	130.39866	9.02763	6.9231002833924835	YE	137.51158	10.09879	7.3439560508285915	-0.13M			61.00771999999999	6.4953	10.646685370310513	0.4M	72.5521	6.591239999999999	9.084836965435873	0.2M
	77.35656999999999	5.7022900000000005	7.37143593621072	YE	82.01395	6.46419	7.881817666384805	-0.13M			77.63646	6.07169	7.820668278795813	0.4M	99.33561999999999	7.966	8.019278482381246	0.2M
	101.20595	8.670860000000001	8.567539754332627	YE	107.91023999999999	8.92247	8.268418270592301	-0.13M			69.73263	5.6529300000000005	8.10657793919432	0.4M	87.12217	7.07257	8.117991092278807	0.2M
	114.09518	7.35169	6.443471144004505	YE	121.42313999999999	7.76318	6.393493036006152	-0.13M			64.11101	5.13464	8.008983168413664	0.4M	84.083	7.44963	8.859852764530286	0.2M
	97.48098	8.32214	8.537193614590251	YE	106.47421999999999	7.8052	7.330600778291685	-0.13M			92.2994	7.49228	8.117365876701257	0.4M	112.84983000000001	9.27868	8.222147964245934	0.2M
	104.8609	7.16546	6.833300114723411	YE	109.30083	8.05213	7.366943142151802	-0.13M			55.262480000000004	4.92537	8.912683614633291	0.4M	67.68875	6.620010000000001	9.7800742368562	0.2M
	105.96898999999999	7.247319999999999	6.839095097537497	YE	110.76881000000002	7.99264	7.2156051870558136	-0.13M			74.75267	6.76865	9.05472674086424	0.4M	94.6907	8.67722	9.163751033628435	0.2M
	123.1266	8.7486	7.105369595197139	YE	121.7514	9.25356	7.600372562451027	-0.13M			67.94035	6.59935	9.713447163578051	0.4M	88.79293	7.201	8.10987991949359	0.2M
	142.89058	10.503060000000001	7.35042156032959	YE	157.11473999999998	12.54846	7.986812694976933	-0.13M			71.49401	4.492	6.283043852205241	0.4M	103.90568	7.0796	6.813487000903126	0.2M
	103.73482	10.02331	9.66243542910664	YE	108.43226000000001	10.4233	9.612729643373658	-0.13M			81.66511	5.5206800000000005	6.760145183175532	0.4M	114.99025	8.60449	7.482799628664169	0.2M
	141.65288	9.79981	6.91818620277964	YE	146.28125	10.74198	7.3433744926297795	-0.13M			81.16353000000001	5.2899400000000005	6.517631749136589	0.4M	110.32003	7.4892	6.788613092291581	0.2M
	111.03063	8.29215	7.468344546005007	YE	112.25613999999999	9.08949	8.097098296805859	-0.13M			66.61204000000001	3.73518	5.607364674614378	0.4M	98.0032	5.03071	5.133209936002089	0.2M
	128.0097	8.169260000000001	6.381750757950375	YE	127.27949	8.0396	6.31649294006442	-0.13M			71.04786999999999	5.3024	7.4631371777929445	0.4M	109.45467	7.816260000000001	7.141093203241124	0.2M
	116.10211000000001	6.93867	5.976351334183332	YE	119.95353999999999	7.340669999999999	6.1195943029276165	-0.13M			59.57986	4.08217	6.851593810391632	0.4M	90.56898000000001	5.53289	6.1090342410834255	0.2M
	132.52218	9.46546	7.142547760684288	YE	137.48176999999998	10.62584	7.7289083490851205	-0.13M			62.82669	4.05463	6.453674385838248	0.4M	77.89371	4.67375	6.000163556210123	0.2M
	122.52638999999999	9.9359	8.109191823900142	YE	125.03778	8.89907	7.117104926207103	-0.13M			48.2957	3.27892	6.789258671061813	0.4M	57.50937	3.6791	6.397392285813599	0.2M
	90.62505	6.47732	7.147383642822818	YE	94.1688	6.51671	6.920243222808403	-0.13M			60.89075	3.72278	6.113867869914561	0.4M	89.39168000000001	5.8406	6.533717679318701	0.2M
	140.36943	9.54349	6.798837895117192	YE	147.28481000000002	10.672880000000001	7.2464227641669225	-0.13M			81.01892	5.34616	6.598656215116174	0.4M	104.07786999999999	6.88161	6.611981970807052	0.2M
	84.62516	5.93864	7.017582005162532	YE	86.72151	5.73475	6.6128345781802	-0.13M			79.82486999999999	6.05523	7.585643421655432	0.4M	115.78805	8.762880000000001	7.568034870610569	0.2M
	102.80542	6.95419	6.764419619121248	YE	107.60229	7.1552	6.649672604551446	-0.13M			62.39573000000001	4.08204	6.542178447146943	0.4M	92.43243000000001	6.5578	7.094696093135276	0.2M
	222.28524	13.95335	6.277227403852816	YE	234.00517000000002	15.98831	6.83246015461966	-0.13M			88.95753	7.48292	8.411789311146565	0.4M	115.28438	9.90578	8.592473672495789	0.2M
	111.53603999999999	8.76693	7.86017685404646	YE	122.20371000000002	9.85164	8.061653774668542	-0.13M			93.1837	9.47456	10.167615151576939	0.4M	116.3755	10.923160000000001	9.386133679339723	0.2M
	126.09747	9.72051	7.708727225058521	YE	131.5182	9.80695	7.4567246206228495	-0.13M			74.87083	5.64541	7.540199567708814	0.4M	119.8428	8.99089	7.502236262837651	0.2M
	127.13733	8.98748	7.06911180217486	YE	134.94124	10.27528	7.614632857975813	-0.13M			73.6249	5.15796	7.005727681803303	0.4M	109.83573999999999	8.06329	7.3412260890671845	0.2M
	144.91605	11.241439999999999	7.757208397551546	YE	150.58267	12.07818	8.02096283722423	-0.13M			87.12325	6.42133	7.370397683741137	0.4M	124.72583	9.576830000000001	7.6783052876858	0.2M
	73.35699	6.0589699999999995	8.259567356839478	YE	81.45059	6.6558	8.17157984982061	-0.13M			91.84808000000001	6.04473	6.581226303260776	0.4M	117.69828999999999	7.6307	6.4832717620621345	0.2M
	85.91212	6.6548300000000005	7.746089841572994	YE	91.63269	7.58145	8.273739426399029	-0.13M			73.74367	4.70706	6.383002093603425	0.4M	101.95649	6.36289	6.2407895760240475	0.2M
	77.62486	5.29915	6.826614566519025	YE	82.43304	6.11552	7.418772860979043	-0.13M
	114.44176000000002	8.36762	7.311684126493685	YE	123.37068000000001	9.61104	7.790376125024194	-0.13M			115.88452	8.62611	7.44371206784133	0.4M	130.28838000000002	9.92203	7.615437385897344	0.3M
	92.17364	7.03631	7.63375516036906	YE	96.2986	7.320289999999999	7.601657760341271	-0.13M			103.03137	8.26229	8.019198424712783	0.4M	114.6189	9.57094	8.350228452724638	0.3M
	82.9393	5.3440199999999995	6.443290454585461	YE	83.31169	7.08599	8.50539702171448	-0.13M			97.92264	7.41323	7.570496465373075	0.4M	110.89936000000002	8.60476	7.759070927009858	0.3M
	81.82417	6.0356	7.376304580908062	YE	87.66381	6.938060000000001	7.914394777046539	-0.13M			83.81628	7.298080000000001	8.707234441805339	0.4M	97.13011	8.40259	8.650860170960375	0.3M
	116.27906000000002	8.64979	7.43882002486088	YE	126.26423	9.65713	7.6483498137200066	-0.13M			83.51359000000001	7.09563	8.496377655421112	0.4M	92.9491	7.66402	8.245394522378376	0.3M
	85.90128	7.43805	8.65883488581311	YE	93.94179	7.8536600000000005	8.360134504569267	-0.13M			85.86917	7.63245	8.88846369424556	0.4M	96.81973	8.53319	8.813482541213448	0.3M
	130.45228999999998	10.70801	8.208372578204646	YE	131.70848999999998	10.56115	8.01857951602057	-0.13M			83.55568000000001	6.33783	7.585157585935509	0.4M	89.58516999999999	6.87953	7.6793179049612785	0.3M
	74.67787	6.45368	8.642024739055895	YE	74.33586	5.86458	7.889301341236922	-0.13M			100.15805	6.908689999999999	6.897788045993307	0.4M	113.36056	8.68105	7.657910299666833	0.3M
	78.29155	5.80284	7.411834355048533	YE	82.79665	5.94961	7.1858100539091865	-0.13M			73.72215	6.30516	8.552599184912541	0.4M	81.09183	6.46801	7.97615493447367	0.3M
	99.15735	7.6086100000000005	7.673268799539319	YE	104.96576	6.94365	6.615157171252798	-0.13M			95.53909	7.43025	7.777183140429744	0.4M	109.5436	7.651789999999999	6.985154769425142	0.3M
	75.05805	6.3091099999999996	8.405640700764275	YE	76.74499	6.258290000000001	8.154656088951215	-0.13M			108.59624	8.34278	7.682383846807219	0.4M	118.64629	9.57625	8.07125953959454	0.3M
	90.08357	6.287640000000001	6.979785548019468	YE	96.12704000000001	6.79595	7.069758935675123	-0.13M			112.57307	9.13648	8.116044094737756	0.4M	124.14917	11.09638	8.937941349104468	0.3M
	102.90263	7.6782699999999995	7.461684895711605	YE	109.67298000000001	7.89387	7.197643394024672	-0.13M			106.28249	8.23184	7.745245712628675	0.4M	113.70621000000001	9.16438	8.059700521194047	0.3M
	95.61516	7.056889999999999	7.380513717699159	YE	102.10647	7.098960000000001	6.952507514949836	-0.13M			99.96137	8.920760000000001	8.92420742132686	0.4M	110.02935	9.6402	8.761480459531935	0.3M
	85.82316	6.06914	7.071680884274128	YE	88.18158000000001	5.91224	6.7046201712421105	-0.13M			81.25171	6.32141	7.780033183301619	0.4M	87.99233000000001	7.41219	8.423677381880896	0.3M
	124.46346000000001	9.0838	7.298366926325203	YE	134.99902	9.26308	6.86159055080548	-0.13M			79.13568000000001	6.40795	8.097422047804478	0.4M	90.29611	6.8650899999999995	7.602863512060486	0.3M
	131.89461	8.693430000000001	6.591194287621003	YE	141.97375	8.39378	5.91220560138758	-0.13M			75.1598	6.61658	8.803349662984733	0.4M	85.86874	7.56067	8.804915502428473	0.3M
	88.57975	5.47401	6.179753273180382	YE	94.50308000000001	5.98591	6.334089851886309	-0.13M			72.55733000000001	6.14385	8.46758005014793	0.4M	82.5226	6.77072	8.204685746692421	0.3M
	79.95297	5.95372	7.446527627428975	YE	83.58699	5.892	7.048943860761107	-0.13M			85.31873	6.801589999999999	7.971977548189008	0.4M	96.17520999999999	8.28705	8.616617525451726	0.3M
	63.76647	5.6318	8.831914327388674	YE	70.97329	5.86034	8.257106300130653	-0.13M			85.42071	7.24101	8.476878733506195	0.4M	98.13995	7.952389999999999	8.103111933519427	0.3M
	73.84411	4.86816	6.592482460686437	YE	81.3249	5.11501	6.289598880539662	-0.13M			88.57264	7.56055	8.535988088420982	0.4M	102.31703	8.42648	8.235657348537188	0.3M
	81.84348	6.15145	7.516114906159904	YE	91.23755	6.31454	6.920988123859091	-0.13M			96.04689	6.4789699999999995	6.745632263574593	0.4M	108.07785	8.06442	7.461676930101774	0.3M
	74.51357	5.24509	7.039107104920621	YE	81.0302	5.28311	6.519927138276841	-0.13M			85.83249	7.574960000000001	8.825282827050689	0.4M	107.93453999999998	8.595189999999999	7.9633359256453025	0.3M
	76.9004	6.08595	7.91406806726623	YE	82.48684	5.411630000000001	6.560598029940292	-0.13M			104.51120999999999	6.76305	6.471124006697464	0.4M	116.12437	7.06504	6.084028701296722	0.3M
	86.53602	6.80575	7.864644110048047	YE	91.07215	6.34016	6.961689166226997	-0.13M			110.94117	8.81387	7.94463407948555	0.4M	122.66287	10.0861	8.222618629418992	0.3M
	149.07206000000002	9.97799	6.6934004936941225	YE	158.47144	11.23103	7.087100363320988	-0.13M			86.94936	7.06915	8.13019210262157	0.4M	95.90753000000001	8.012410000000001	8.354307529346237	0.3M
	128.74653999999998	9.00468	6.994114171922602	YE	142.15641000000002	10.39644	7.313381084961275	-0.13M			106.43126000000001	8.317219999999999	7.814640172445575	0.4M	117.93186000000001	9.528780000000001	8.079903089801178	0.3M
	119.88308	9.16146	7.6419958512911075	YE	127.29346000000001	9.52029	7.47900952649099	-0.13M			132.81292	11.41717	8.596430226818295	0.4M	148.92528000000001	12.27764	8.244161098773827	0.3M
	105.76695	9.74188	9.210703343530282	YE	111.26466	9.027560000000001	8.113591503357851	-0.13M			74.01525	5.62613	7.601311891806081	0.4M	82.39287	7.11959	8.641026826714496	0.3M
	111.7088	7.661569999999999	6.858519651092841	YE	120.41458999999999	7.82132	6.495325857107516	-0.13M			84.41897	7.19157	8.51890280111212	0.4M	97.09697	7.85865	8.09360992418198	0.3M
	126.92443	9.08714	7.159488523998099	YE	134.61417	8.67994	6.448013608077069	-0.13M			80.8674	6.17288	7.633335559199381	0.4M	92.62043	7.0457600000000005	7.607133760877595	0.3M
	80.98755	6.08861	7.517958007125787	YE	89.53688000000001	6.13814	6.8554320856389	-0.13M			96.95954	7.458589999999999	7.692476676353868	0.4M	107.42706000000001	8.18126	7.615641720065688	0.3M
	99.13064	7.56968	7.636064893760396	YE	104.79207	6.84612	6.533051594457481	-0.13M			168.89338	20.37332	12.062829223975504	0.4M	191.71475	25.3101	13.2019575958553	0.3M
	79.03099	5.7364	7.258418501400526	YE	87.12008	6.0461800000000006	6.940053314918904	-0.13M			120.3526	7.7122	6.408004480169104	0.4M	134.17126000000002	8.6028	6.4118053299939195	0.3M
	78.99118	5.40081	6.83723170105827	YE	82.82745	5.54931	6.699844073432177	-0.13M			99.06675	6.83852	6.902941703447422	0.4M	108.36606	6.9650300000000005	6.427316818568471	0.3M
											120.31238	7.70553	6.4046027516037825	0.4M	128.71562	8.75661	6.8030671025008465	0.3M
	109.41903	9.69768	8.862882443757726	YE	105.59248000000001	8.721119999999999	8.259224520534037	0.1M			112.67645	8.15738	7.239649456474711	0.4M	124.32401000000002	10.19213	8.198038335475182	0.3M
	103.43844	7.484439999999999	7.235646631948432	YE	102.81826	7.32695	7.126117481466814	0.1M			82.32296	5.76309	7.000586470651688	0.4M	88.74721	6.68151	7.528698648667379	0.3M
	112.99213999999999	8.54182	7.559658574481376	YE	113.91685	8.12696	7.134115804641719	0.1M			93.56355	6.74345	7.207347305654819	0.4M	103.49717	7.726260000000001	7.465189627890309	0.3M
	90.87438	7.90965	8.703938337736114	YE	90.19429000000001	7.46488	8.276444107492836	0.1M			96.03645	6.8848	7.168944707972859	0.4M	107.89096	7.1526	6.6294710882172145	0.3M
	88.30265	7.38178	8.359635865967782	YE	85.06562	7.800789999999999	9.1703205125643	0.1M			79.88918000000001	7.27003	9.100143473747007	0.4M	126.13978	10.91199	8.650712725200567	0.3M
	110.23306000000001	9.05786	8.217008581636035	YE	104.39161999999999	8.6497	8.285818344422665	0.1M			106.12573	8.58313	8.08769937318688	0.4M	124.62951000000001	10.25532	8.228645045623624	0.3M
	137.77862	9.97485	7.23976622788064	YE	133.20979	8.487589999999999	6.371596261806283	0.1M			80.76479	7.03148	8.706120575562693	0.4M	87.0253	7.959980000000001	9.146742384111288	0.3M
	72.4709	4.95259	6.833901607403798	YE	69.24717	5.01492	7.242057689866605	0.1M			87.16768	7.9442	9.11369902238995	0.4M	97.27025	7.718889999999999	7.93550957255687	0.3M
	74.32265	6.6375	8.930655728771782	YE	70.66299000000001	5.78753	8.19032707220569	0.1M			85.30914	6.599130000000001	7.735548617651052	0.4M	85.64516	6.9698199999999995	8.138019708294081	0.3M
	168.95139	13.08282	7.743540908423423	YE	156.68274	11.234060000000001	7.169940990309463	0.1M			80.79217	6.14947	7.611467794465726	0.4M	80.12471	6.4031199999999995	7.991442340321731	0.3M
	172.28395	12.45388	7.228694257358273	YE	160.11441000000002	11.351389999999999	7.089549279168563	0.1M			118.61846000000001	12.52699	10.560742400466165	0.4M	135.522	13.9912	10.323932645622113	0.3M
	116.79184	8.73514	7.479238275550758	YE	108.65624	9.15656	8.427090795705798	0.1M			81.27835	6.90062	8.49010837449333	0.4M	96.04231	8.635530000000001	8.991380986150793	0.3M
	83.46614	6.17281	7.395585802817766	YE	77.01947	6.05472	7.861284945222293	0.1M			71.25009	5.9915199999999995	8.40914025512108	0.4M	86.23658	7.839760000000001	9.090991317141752	0.3M
	90.8538	6.88047	7.573122973392417	YE	83.25286	6.76328	8.123780972809822	0.1M			77.04	5.63598	7.315654205607476	0.4M	80.43196	7.7261	9.605758705867668	0.3M
	92.26816	6.65865	7.216628141278639	YE	87.7362	6.68337	7.617574045832849	0.1M			103.07831	8.1048	7.862759876447332	0.4M	121.82587	9.903369999999999	8.129119045076386	0.3M
	81.27341	6.13331	7.546514905674561	YE	73.70957	5.70688	7.742386775557095	0.1M			87.22604	7.53178	8.634783832901277	0.4M	102.45089	8.08799	7.894504381562717	0.3M
	85.48455	6.54838	7.660308207740463	YE	76.85376	6.40627	8.335662432130842	0.1M			69.49127	5.51544	7.936881855807211	0.4M	77.72406	5.98946	7.706056528699093	0.3M
	106.55406	8.12019	7.620723227251968	YE	100.91521	7.563060000000001	7.494469862372581	0.1M			70.05569	6.1811300000000005	8.82316625530346	0.4M	96.02684	8.93235	9.301930585240543	0.3M
	122.2345	9.65348	7.897508477557482	YE	117.78732	8.7272	7.409286500448435	0.1M			97.37827	6.94165	7.1285411005966735	0.4M	100.36464000000001	9.887260000000001	9.85133808082209	0.3M
	106.87491000000001	7.79248	7.291215496696091	YE	107.00605	7.645560000000001	7.14497918575632	0.1M			85.15890999999999	6.50519	7.638883588340903	0.4M	99.58516999999999	7.45223	7.483272860808493	0.3M
	140.69935	8.00794	5.691525938108455	YE	101.61769	7.84087	7.7160482589202735	0.1M			93.29829000000001	7.0404	7.546119012470647	0.4M	105.44116000000001	8.2187	7.7945842022223575	0.3M
	108.23937	7.72014	7.1324694517346146	YE	108.45253000000001	7.732069999999999	7.129451014190262	0.1M			70.18491999999999	6.27548	8.941350934075299	0.4M	89.3042	7.35168	8.232177210030436	0.3M
	73.76298	6.39885	8.67488000078088	YE	72.37164	6.05126	8.36136917720809	0.1M			96.19798	7.0944	7.374791029915598	0.4M	102.07023000000001	8.73141	8.55431598420029	0.3M
	104.38264000000001	7.895230000000001	7.563738568022423	YE	101.67135	7.16875	7.05090470422592	0.1M			89.83969	7.24718	8.066790969559221	0.4M	87.22652	7.73652	8.869458508719596	0.3M
	85.18642	7.3301	8.604775268170679	YE	81.81593000000001	6.62865	8.101906315799381	0.1M			76.25986	6.15725	8.074037901459562	0.4M	77.08228000000001	6.64722	8.62353838002716	0.3M
	72.21073	5.57304	7.717744994407341	YE	68.09676999999999	5.49106	8.063613002496302	0.1M			96.99568000000001	7.27031	7.495498768604953	0.4M	109.0401	8.55357	7.844426041428797	0.3M
	73.11928	5.467169999999999	7.477056666859958	YE	71.3528	4.99458	6.999837427543137	0.1M			79.78259	6.61074	8.285943086079307	0.4M	87.15442	7.288010000000001	8.362180598528452	0.3M
	83.55581	6.21166	7.434144914638492	YE	81.21275	6.04178	7.439447623679779	0.1M			83.37904	7.15343	8.579410365003003	0.4M	86.71916	7.54738	8.703243896735161	0.3M
	86.42894	6.9244699999999995	8.011749305267426	YE	85.78576	6.11555	7.128863811429776	0.1M			96.73278	8.10873	8.382608253375949	0.4M	106.46412	9.39552	8.825057681404777	0.3M
	85.79173	7.02164	8.18451848447397	YE	85.22412	6.39577	7.504647745262726	0.1M			106.35408000000001	8.90744	8.375268724998607	0.4M	132.78958	11.26587	8.484001530843006	0.3M
	75.73576	6.51962	8.60837733720504	YE	74.04588000000001	5.69853	7.6959447304833155	0.1M			97.04439	7.6070899999999995	7.838773575680159	0.4M	125.29815	10.21205	8.150200142619822	0.3M
	96.53506	6.90342	7.151204961181978	YE	93.43119	6.13023	6.561224362014441	0.1M			67.40896	5.5252099999999995	8.196551318993796	0.4M	76.53466999999999	6.63715	8.672082861270585	0.3M
	88.47998	7.33864	8.294124840444132	YE	86.0766	5.9958800000000005	6.965749111837597	0.1M			81.3891	6.32501	7.771323187011528	0.4M	87.27068	6.77026	7.757771567724693	0.3M
	84.56754000000001	6.8808300000000004	8.136490667695902	YE	82.61101	6.158580000000001	7.4549143025850935	0.1M			61.45568000000001	5.43845	8.849385443298322	0.4M	67.75829	5.74587	8.479951309278908	0.3M
	77.70501	6.030130000000001	7.760284697215791	YE	72.86766999999999	5.41854	7.436137315767062	0.1M			87.70149	7.23042	8.244352518982287	0.4M	95.84663	8.335980000000001	8.69720719445222	0.3M
	113.16422	9.56959	8.456374285087637	YE	109.35383	8.68319	7.940453480230185	0.1M			92.78621	6.23359	6.718228926475174	0.4M	99.47298	7.28212	7.320701561368725	0.3M
	105.78516	8.70673	8.230577899584404	YE	104.68263	7.79795	7.449134588995328	0.1M			68.84947	6.29066	9.136831409159722	0.4M	78.89775999999999	7.49776	9.503134182770209	0.3M
	90.08428	7.358169999999999	8.16809547681349	YE	87.61468	6.73655	7.688837076161209	0.1M			89.96869000000001	6.74228	7.494029311752788	0.4M	92.16678	7.521389999999999	8.160630109894258	0.3M
	135.40285	10.23788	7.561052075344057	YE	131.48653000000002	9.2141	7.007637968695348	0.1M			97.95274	8.00924	8.176637019035915	0.4M	110.78995	9.06403	8.181274565066596	0.3M
	86.20293000000001	7.479760000000001	8.676920842481804	YE	87.46	5.97409	6.830654013263207	0.1M			99.23525	7.1619399999999995	7.217133024807214	0.4M	109.63686000000001	8.12081	7.407007095971191	0.3M
	74.37478	5.437819999999999	7.311376248776802	YE	72.47294000000001	5.46818	7.5451333973756265	0.1M			90.84519	6.0727	6.684668720490319	0.4M	104.42642	7.34369	7.032406166945108	0.3M
	88.82569000000001	6.20593	6.986638662756237	YE	84.12366999999999	6.28761	7.474245952417435	0.1M			72.93674	5.8531699999999995	8.024995358991916	0.4M	79.48550999999999	6.52966	8.21490608791464	0.3M
	121.59818999999999	8.45783	6.955555835164981	YE	111.43661999999999	7.443289999999999	6.679393183318015	0.1M			79.80327	6.09436	7.636729672856764	0.4M	82.84394	6.09657	7.359101945175471	0.3M
	116.76868999999999	7.53143	6.449871108428125	YE	109.70903999999999	7.45412	6.7944446510515455	0.1M			88.39876	8.46751	9.578765584494626	0.4M	101.01498000000001	9.28227	9.189003452755225	0.3M
	76.38319	6.56015	8.588473458623554	YE	71.49076	5.5984300000000005	7.830984032062327	0.1M			85.6087	6.56765	7.671708599710077	0.4M	88.96155	7.4314	8.353496538673168	0.3M
	83.27013000000001	5.88422	7.066423458207642	YE	74.58525999999999	5.317	7.12875439463508	0.1M			98.36506999999999	7.99597	8.128871356468307	0.4M	115.41658000000001	8.88762	7.700470764252415	0.3M
	83.15902	6.054209999999999	7.280280599747327	YE	76.95408	5.1207199999999995	6.654254069439852	0.1M			91.99825	6.0233099999999995	6.547200626098866	0.4M	94.74334	7.7172	8.145374651136429	0.3M
	83.76086	5.94171	7.093659258035316	YE	76.36708	5.57725	7.30321232656794	0.1M			75.08265	6.7256800000000005	8.957701945789074	0.4M	85.02077	6.88784	8.101361584939774	0.3M
	82.22972	5.31756	6.466713008386749	YE	76.65834	5.00712	6.53173549022846	0.1M			65.36514	5.14365	7.869102705203416	0.4M	71.82651	5.63227	7.8414919505346985	0.3M
	86.47671	6.1005199999999995	7.0545236977678725	YE	81.72322	5.49945	6.7293603947568394	0.1M			72.3658	6.05005	8.360371888378213	0.4M	76.33444	6.684060000000001	8.756283533356635	0.3M
											70.09897	5.60126	7.990502570865164	0.4M	83.80548	6.33973	7.564815570533097	0.3M
	83.66965	6.20742	7.418962550936928	YE	74.33348000000001	6.77036	9.108089652199789	0.2M			95.75525	8.16283	8.524681414334983	0.4M	102.62311	8.72298	8.500015249976345	0.3M
	78.08967	5.82891	7.464380371949324	YE	72.66959	5.97329	8.219793176210297	0.2M			106.60053	8.163310000000001	7.657851232071736	0.4M	117.47129	8.100710000000001	6.895906225257253	0.3M
	84.57508	6.821510000000001	8.06562642329159	YE	77.11549000000001	6.74558	8.747373582142835	0.2M			81.19057	7.362939999999999	9.068713275445658	0.4M	90.80615999999999	8.0792	8.897193758661308	0.3M
	128.01556000000002	8.80616	6.878976274446637	YE	112.56656000000001	7.77718	6.908961240354151	0.2M			100.77875	9.99762	9.920365156344962	0.4M	112.3303	10.61689	9.451492607070398	0.3M
	107.1907	7.86285	7.335384506305117	YE	93.74744	6.995660000000001	7.4622411022637	0.2M			100.43890999999999	9.21449	9.174223416004814	0.4M	109.73777	3.0253900000000002	2.756926808335909	0.3M
	78.09268	7.08373	9.070927006218765	YE	71.3253	6.11294	8.570507239366677	0.2M			85.95479	7.0571399999999995	8.210292876057284	0.4M	95.87944	7.01014	7.311411080415155	0.3M
	79.01836999999999	6.135330000000001	7.764435029474794	YE	70.20496	6.16085	8.775519564429636	0.2M			73.51262	6.65235	9.049262561992757	0.4M	79.34308	7.67737	9.676168356459064	0.3M
	90.99948	6.6873	7.348723311385955	YE	76.04658	7.318460000000001	9.623654344482027	0.2M			100.78366	8.333839999999999	8.269038850146938	0.4M	115.40976	9.319189999999999	8.074871657301772	0.3M
	127.06866000000001	9.58226	7.541009718682797	YE	115.87423999999999	8.006160000000001	6.909352760371937	0.2M			91.0602	7.32655	8.045831219347201	0.4M	102.84447	8.22287	7.995442049533631	0.3M
	80.58629	6.11562	7.588908733731257	YE	71.2522	4.82209	6.767636648412259	0.2M			68.43158000000001	6.10994	8.928538549014942	0.4M	79.42712	5.9514	7.492906704913888	0.3M
	83.70135	5.55995	6.642604928116451	YE	72.37999	4.9013599999999995	6.7717058264307575	0.2M			75.23567	6.26295	8.324442382183877	0.4M	89.72564	7.3614	8.20434381967072	0.3M
	70.25986999999999	4.82472	6.866964029395444	YE	63.5699	5.09731	8.01843325221528	0.2M			55.58325	4.9596800000000005	8.922975896515588	0.4M	62.43796	5.54975	8.888423004210901	0.3M
	107.29186999999999	9.10533	8.486505081885516	YE	93.95948	8.77112	9.335002705421529	0.2M			81.93571999999999	6.05924	7.395114121167179	0.4M	89.73638000000001	6.662960000000001	7.425037649167483	0.3M
	95.96346	6.15469	6.4135765842540495	YE	84.20789	6.46441	7.676727204541047	0.2M			104.91903	7.50143	7.149732512776757	0.4M	120.87663	8.24058	6.817347571652187	0.3M
	103.45617	8.0148	7.747048822704339	YE	95.19312	7.47598	7.853487731046109	0.2M			69.82676	5.16247	7.393254391296403	0.4M	79.09536	5.979769999999999	7.560203278675259	0.3M
	100.70984	6.77002	6.722302408582914	YE	88.08075	6.4795	7.35631792417753	0.2M			108.2002	8.6423	7.987323498477822	0.4M	121.59626000000002	9.51858	7.82802036838962	0.3M
	118.80285	8.74658	7.362264457460406	YE	109.05063	8.054039999999999	7.385596947032767	0.2M			77.95591999999999	6.40074	8.210717030855387	0.4M	85.26671	7.04668	8.264280397355545	0.3M
	88.6853	6.9779	7.868158533601398	YE	78.75173000000001	6.21887	7.896804298775403	0.2M			83.87912	6.36064	7.583102922395943	0.4M	97.28705	7.4142	7.620952634497604	0.3M
	82.58740999999999	5.70599	6.909031291815546	YE	70.05138000000001	5.91493	8.443702322495287	0.2M			61.99071	5.51359	8.894219795191892	0.4M	72.59472	6.376519999999999	8.783724215755635	0.3M
	113.96088999999999	6.79535	5.962879019284599	YE	100.30467	6.94572	6.924622751861902	0.2M			88.4826	7.2191	8.1587792402122	0.4M	98.07321	8.09457	8.253599530391632	0.3M
	114.02645	9.553519999999999	8.378336780632914	YE	98.61395	8.289819999999999	8.406336020410905	0.2M			81.90866	6.25124	7.631964678704303	0.4M	91.96504	7.26222	7.896718144199144	0.3M
	95.24374	7.77367	8.161869745980157	YE	80.572	7.021439999999999	8.714491386585909	0.2M			90.88078	6.56152	7.219920427619569	0.4M	98.65601	7.297510000000001	7.396923917762336	0.3M
	107.92426	8.932030000000001	8.27620221811111	YE	94.45598000000001	8.09932	8.574703263890756	0.2M			85.57758000000001	7.139810000000001	8.343084719151909	0.4M	95.89672	7.7405100000000004	8.071715070129615	0.3M
	119.24033	9.222380000000001	7.734279165446792	YE	100.64106	7.81084	7.761086777106679	0.2M			58.150890000000004	5.27493	9.071107940050444	0.4M	72.25046	5.80399	8.03315300691511	0.3M
	142.99235	10.71145	7.490925213831369	YE	119.02265	8.83946	7.426704076913092	0.2M			88.55141	6.74723	7.619562466594264	0.4M	98.69918	7.55014	7.649648153105224	0.3M
	122.55676000000001	9.22148	7.524252436177326	YE	103.97089	7.594710000000001	7.304650368963853	0.2M			66.8235	5.6239	8.416051239459172	0.4M	77.69298	6.33545	8.154469039545143	0.3M
	102.17065	7.5941399999999994	7.432799928355159	YE	85.30213	6.85825	8.039951640129033	0.2M			96.47872	6.894539999999999	7.1461768978692914	0.4M	109.42213000000001	7.952369999999999	7.267606653242812	0.3M
	93.31673	5.68706	6.0943627150244115	YE	77.96497	4.98306	6.391408859645558	0.2M			113.05984	8.5354	7.549453457567249	0.4M	127.44788999999999	9.27936	7.2809051605326705	0.3M
	79.11766999999999	6.3691	8.05016123452574	YE	66.98538	5.1855199999999995	7.741271304275648	0.2M			68.75645	4.7015	6.837903934830841	0.4M	82.71954000000001	5.45174	6.590631427592561	0.3M
	78.60648	5.899369999999999	7.504941068471707	YE	67.01288000000001	5.9574300000000004	8.88997756849131	0.2M			74.42452	5.677169999999999	7.62809084962859	0.4M	84.18365	7.1662	8.512579342900906	0.3M
	72.89244000000001	6.48044	8.890414424321644	YE	62.807759999999995	5.65667	9.006323422456079	0.2M			73.20652	6.07572	8.299424696051663	0.4M	88.49876	6.33566	7.159038160534678	0.3M
	88.61119000000001	7.1959	8.120757660516691	YE	79.52383	6.02934	7.58180283821843	0.2M			83.92159000000001	7.005389999999999	8.347542032985789	0.4M	94.38051999999999	7.608789999999999	8.061822503202992	0.3M
	96.01115	7.326789999999999	7.631186586141296	YE	85.92628	6.917669999999999	8.050703463480554	0.2M			93.08617	8.07782	8.677787473692385	0.4M	103.3342	8.66956	8.389826407907547	0.3M
	94.10425	7.7367300000000006	8.221445896439322	YE	85.75208	6.6733199999999995	7.782108608910709	0.2M			79.70464	6.709860000000001	8.418405754043931	0.4M	92.63428	6.987589999999999	7.543201069841531	0.3M
	90.18238000000001	6.43995	7.1410291012501546	YE	84.66954	5.58486	6.596067487788407	0.2M			67.25837	5.44172	8.090769966622743	0.4M	75.98751	6.774889999999999	8.915794187755328	0.3M
	145.38284	11.12293	7.6507860212388215	YE	130.7574	9.939789999999999	7.601703612950395	0.2M			83.05409	6.67621	8.038387995100543	0.4M	98.02637	7.31654	7.463848758247398	0.3M
	97.28965	7.23848	7.440133662727742	YE	85.26987	5.89232	6.910201692579101	0.2M			91.62813	7.80715	8.520472915904756	0.4M	103.92196	8.41934	8.101598545677929	0.3M
	76.60911999999999	6.79232	8.866202875062395	YE	66.82916	5.886	8.807532520235178	0.2M			59.37473000000001	4.78949	8.066546155241463	0.4M	68.5557	5.240130000000001	7.643609502929735	0.3M
	74.30396	5.6057	7.54428162375195	YE	68.16255	4.92633	7.227326442452638	0.2M			59.915409999999994	5.43848	9.076930292223654	0.4M	65.14180999999999	5.85354	8.98584181188702	0.3M
	84.51921	6.41927	7.595042594458704	YE	74.6855	6.31038	8.449270608083228	0.2M			67.205	6.3371	9.429506733129976	0.4M	76.96998	6.8572	8.908927870320351	0.3M
	81.02121	7.15455	8.830465504032833	YE	71.6739	6.65132	9.279974997872307	0.2M			79.25516	6.9595899999999995	8.781245284218718	0.4M	87.94039000000001	8.04461	9.147798866937023	0.3M
	76.78888	5.462219999999999	7.1132955709212045	YE	68.88979	5.60482	8.135922609141353	0.2M			84.62051	6.77642	8.0080112965521	0.4M	91.5253	7.60568	8.309920863411538	0.3M
	75.69626	5.83303	7.705836457441888	YE	67.09879000000001	5.4545900000000005	8.1291927917031	0.2M			88.49356999999999	8.148430000000001	9.207934542588802	0.4M	103.4984	7.92392	7.6560797075123865	0.3M
	75.96571999999999	6.67143	8.782158584161383	YE	67.04135	5.76889	8.604972901052859	0.2M			102.36769	8.45115	8.255681064992284	0.4M	119.50076999999999	9.69696	8.114558592383966	0.3M
	117.01933999999999	10.90428	9.318357119430003	YE	105.82723	10.10492	9.548506561118533	0.2M			78.59976	6.89668	8.774428827772502	0.4M	91.25981	7.238760000000001	7.932034923149632	0.3M
	79.63672	6.09826	7.657598153213743	YE	69.61433000000001	6.03461	8.668631875075144	0.2M			75.62403	5.57428	7.371043304621559	0.4M	86.0355	6.63298	7.709584996890818	0.3M
	89.60101999999999	5.83979	6.517548572549732	YE	79.10759	5.6746300000000005	7.173306632144906	0.2M			89.42309	7.21352	8.066730863359787	0.4M	101.71266	8.46376	8.321245359230602	0.3M
	70.83646	5.31473	7.502817052122593	YE	62.26315	4.82578	7.750619748599291	0.2M			68.86174	6.28181	9.122351540928243	0.4M	80.22622	6.91903	8.62439985331479	0.3M
	74.14765	5.38467	7.262091246317313	YE	64.20645999999999	4.8002	7.476194762956875	0.2M			72.77869	6.10935	8.394421498930525	0.4M	84.63963000000001	6.6681	7.878224420404484	0.3M
	84.99145	6.511480000000001	7.6613353460848135	YE	77.35494	5.65055	7.304704780328186	0.2M			74.31357	6.31911	8.503305654673838	0.4M	86.35519000000001	7.437	8.612105421804989	0.3M
	114.79661999999999	8.92988	7.778870144434567	YE	101.18168	7.55018	7.462003002915152	0.2M			73.91745999999999	5.60043	7.576599628829239	0.4M	84.36135	6.98049	8.274511965491307	0.3M
	144.11196	9.81058	6.807609861110764	YE	127.93911000000001	9.04893	7.07284113513061	0.2M			87.13854	6.80655	7.811182055609376	0.4M	89.11829	7.55965	8.482714378832897	0.3M
	128.6234	9.06637	7.0487718408936475	YE	108.23848000000001	7.843089999999999	7.246119864210952	0.2M			53.91944	4.595940000000001	8.52371612168079	0.4M	61.35109	5.05652	8.241939955753027	0.3M
	113.30393000000001	8.6433	7.62842030280856	YE	97.71901	7.78706	7.968828173760664	0.2M			71.41187	5.68266	7.957584642441097	0.4M	82.36478000000001	6.682519999999999	8.113322223406653	0.3M
	86.20223	6.65406	7.719127451807221	YE	74.26813	5.93502	7.991341642774633	0.2M			74.65427	5.86446	7.855491722040816	0.4M	85.01144000000001	6.5914	7.753544699395751	0.3M
	89.8065	7.314610000000001	8.144855884596328	YE	78.80849	6.22199	7.895075771658611	0.2M			100.38754	7.807639999999999	7.777499080065114	0.4M	111.55758	8.58067	7.691696073005527	0.3M
	101.8936	7.74063	7.596777422723311	YE	87.71344	6.72588	7.668015300733844	0.2M			68.5751	6.15094	8.969640583827074	0.4M	77.84108	7.30735	9.387523914108078	0.3M
	110.64883999999999	7.267589999999999	6.5681574248767545	YE	100.336	6.87789	6.8548576782012445	0.2M			79.56756999999999	7.99335	10.045989842344062	0.4M	83.88280999999999	7.699560000000001	9.178948583148324	0.3M
	103.82036	7.37467	7.103298428169581	YE	89.76978000000001	6.811030000000001	7.587219217870424	0.2M			63.60528000000001	6.14265	9.657452966168844	0.4M	70.81316	6.28118	8.870074432492492	0.3M
											80.03617	7.1977199999999995	8.993084001895642	0.4M	92.14619	6.71632	7.288765818749532	0.3M
	79.10425	6.22551	7.8700069844540606	YE	64.90827	5.36865	8.27113401728316	0.3M			70.10318000000001	5.27908	7.53044298418417	0.4M	77.06486	6.18475	8.02538277497682	0.3M
	74.71803	6.09502	8.157361750570779	YE	61.47728000000001	4.73235	7.697721825038453	0.3M			72.09487	5.453930000000001	7.564934925328252	0.4M	83.99014	6.42319	7.647552438893422	0.3M
	79.63906	6.31861	7.934058990651069	YE	64.18695	5.33516	8.311907638546465	0.3M			80.57911	6.69884	8.313370549761594	0.4M	93.09603	7.777810000000001	8.35460975081322	0.3M
	75.56029000000001	5.35458	7.086500065047393	YE	61.47009	4.61956	7.5151345963540965	0.3M			69.19055	5.99494	8.66439130777252	0.4M	74.27393000000001	6.93763	9.340599050030072	0.3M
	83.27681	6.27726	7.537824755775348	YE	68.14395	5.258780000000001	7.7171634459111935	0.3M			99.20616	8.79199	8.862342822260231	0.4M	107.96978	9.66517	8.951736309919314	0.3M
	81.26984	6.09309	7.497356953083702	YE	65.99848	4.58097	6.941023490237956	0.3M			77.98316	6.56411	8.417342923779955	0.4M	87.2231	6.9961899999999995	8.02102883295824	0.3M
	80.71211	5.77635	7.156732738123189	YE	67.28225	5.97697	8.883427649937389	0.3M			125.46371	10.02422	7.989736633804307	0.4M	144.04179	11.60591	8.057321420401676	0.3M
	88.90066999999999	6.41069	7.211070512741919	YE	75.18509	5.5199300000000004	7.341788112510074	0.3M			107.07531999999999	8.75275	8.174386030319592	0.4M	117.84648	9.26367	7.860794823909886	0.3M
	73.38359	5.59483	7.6240887097510495	YE	58.19809	4.70841	8.090317053360343	0.3M			94.73765	8.19777	8.653127874715068	0.4M	108.20318999999999	9.47349	8.755277917407057	0.3M
	72.96011999999999	5.50443	7.54443660454506	YE	59.942969999999995	4.57215	7.627499938691727	0.3M			95.90701	7.442639999999999	7.760266950246911	0.4M	107.7295	8.221910000000001	7.631994950315374	0.3M
	73.74677	6.645810000000001	9.01166247687865	YE	59.38442	5.153230000000001	8.677747463055125	0.3M			79.45173	7.88095	9.919167273009663	0.4M	94.79462	8.3942	8.855143888967538	0.3M
	70.70268	4.99604	7.066266794978635	YE	58.35609	4.25929	7.298792636723947	0.3M			88.56934	7.49108	8.457870409782888	0.4M	96.70581	8.1937	8.472810475399564	0.3M
	92.92853000000001	6.5906199999999995	7.092138442306145	YE	78.86459	5.821330000000001	7.3814242868694295	0.3M			75.32046	7.00845	9.304842269948962	0.4M	80.10982	7.24667	9.045919713713001	0.3M
	94.87495	7.355739999999999	7.753089724948471	YE	77.71439000000001	6.03374	7.7639932578766935	0.3M			79.10638	6.64107	8.395113011112377	0.4M	86.66332	7.27566	8.395316496067771	0.3M
	102.22039000000001	7.434260000000001	7.2727760087786795	YE	82.37539	5.896059999999999	7.157550331476427	0.3M			90.20111999999999	7.17678	7.956420053320847	0.4M	101.28015	7.759360000000001	7.661284071952895	0.3M
	78.50480999999999	5.91239	7.531245537693806	YE	63.15844	5.45634	8.639130415507413	0.3M			77.53265	5.79235	7.47085260209731	0.4M	88.24164	6.49339	7.358646099505857	0.3M
	80.90109	6.0753	7.50954035353541	YE	67.12857	5.0827800000000005	7.571709035363036	0.3M			70.88919	6.00634	8.472857427204344	0.4M	79.12482	6.77797	8.56617430535703	0.3M
	57.943169999999995	4.446	7.673035493225518	YE	49.972409999999996	3.62287	7.249740406756448	0.3M			78.51349	6.668660000000001	8.493648671075507	0.4M	89.7822	7.0134300000000005	7.811604081878146	0.3M
	63.441680000000005	5.1651	8.141493100434918	YE	50.7275	4.25079	8.379656005125426	0.3M			55.69396	4.57479	8.214158231880083	0.4M	62.89971	5.12235	8.143678245893343	0.3M
	106.07088	8.0638	7.6022750070518885	YE	86.9736	6.0126599999999994	6.913201247275034	0.3M			84.524	6.81388	8.0614736642847	0.4M	97.05957	7.83103	8.068271887048336	0.3M
	111.06205	8.41258	7.574666594034596	YE	91.42381999999999	6.6935899999999995	7.321494551419969	0.3M			62.54821	4.65118	7.436152049754901	0.4M	70.26557	5.22613	7.437682495139512	0.3M
	70.97628	5.6534699999999996	7.965294884431811	YE	59.0794	4.9076699999999995	8.306905621925747	0.3M			67.37044	5.6231800000000005	8.346657673602845	0.4M	76.2696	5.98326	7.844881840208942	0.3M
	76.70711999999999	5.794630000000001	7.5542270391588175	YE	63.56556	4.62976	7.283440907308927	0.3M			71.06149	5.27959	7.429607794601548	0.4M	80.72685	6.1423	7.608744798044269	0.3M
	72.10906	5.4833099999999995	7.604190097610481	YE	58.12902	4.13166	7.107740677547978	0.3M			90.90771	7.04944	7.754501790882204	0.4M	101.04848	8.56437	8.475506014538764	0.3M
	82.29696	6.66675	8.100846009378719	YE	68.90517	5.7251199999999995	8.308694398402906	0.3M			69.90964	5.09307	7.285218462003237	0.4M	71.25386	5.87769	8.248942583601787	0.3M
	94.27346999999999	7.93285	8.414721554218808	YE	78.9085	6.16092	7.807675979140397	0.3M			91.22459	6.880780000000001	7.542681200321098	0.4M	103.20822	7.19717	6.973446494862522	0.3M
	91.70156	7.5025699999999995	8.181507490167016	YE	72.74124	6.0479400000000005	8.3143207347029	0.3M			83.8672	6.354480000000001	7.576835759391039	0.4M	91.0453	6.5427800000000005	7.186290780523542	0.3M
	76.35356999999999	6.81015	8.919229316978893	YE	62.27295	5.2762400000000005	8.472763856538032	0.3M			85.8754	6.373530000000001	7.421834425225385	0.4M	95.36312	7.386589999999999	7.745751187670873	0.3M
	107.40848999999999	8.43621	7.854323247631544	YE	89.57204	6.49571	7.251939332854315	0.3M			93.66256	7.3421199999999995	7.838905961998048	0.4M	114.64781	8.3629	7.29442629562658	0.3M
	97.53866	7.714360000000001	7.909028071535944	YE	78.87351	5.540780000000001	7.024893402106741	0.3M			92.99186999999999	6.67347	7.176401549941948	0.4M	105.47728000000001	7.69935	7.299534079756323	0.3M
	86.16636	6.96282	8.080670925405228	YE	69.79224	5.226380000000001	7.488482960283265	0.3M			96.96646	7.62333	7.861821499928945	0.4M	108.31215	8.12468	7.501171382896563	0.3M
	72.84042	6.36175	8.73381839368856	YE	59.1091	5.20397	8.804008181481363	0.3M			84.1268	6.67696	7.936781144653072	0.4M	91.11453	7.322089999999999	8.03613869269808	0.3M
	72.23956	6.72695	9.312003007770258	YE	57.80679	5.0151699999999995	8.675745530931573	0.3M			72.91645	6.15459	8.440605652085367	0.4M	79.91926	6.4491	8.069519162214466	0.3M
	92.51436	7.68618	8.308094008324762	YE	76.95034	5.71992	7.4332615034579455	0.3M			81.05147	6.555630000000001	8.088230848866777	0.4M	90.57504	7.103110000000001	7.842237773232008	0.3M
	107.36211999999999	7.334460000000001	6.83151562208347	YE	89.04498000000001	5.78536	6.4971208932833715	0.3M			100.56838	8.379719999999999	8.332360529223996	0.4M	108.10392	9.210339999999999	8.519894560715281	0.3M
	99.59951	7.21554	7.244553713165858	YE	81.70518	6.13894	7.513526070195304	0.3M			72.48772	5.904319999999999	8.14526929526822	0.4M	80.03596	6.34678	7.9299105052279	0.3M
	106.61233	8.98076	8.423753612738789	YE	88.28745	6.7095199999999995	7.5996305250633	0.3M			79.05176999999999	6.37129	8.059642434318675	0.4M	89.83707	7.287539999999999	8.111952003777505	0.3M
	85.37385	7.276389999999999	8.522972783820805	YE	69.78041	6.55933	9.39995910026897	0.3M			69.54691	5.69451	8.188012954134125	0.4M	78.46521	6.54223	8.337746117037092	0.3M
	72.25685	6.06444	8.392892853757118	YE	59.015209999999996	4.77255	8.086982999806322	0.3M			96.33927	7.622260000000001	7.91189304216235	0.4M	107.62631999999999	7.9823699999999995	7.4167452719743645	0.3M
	70.4408	6.00234	8.521112764193479	YE	57.3697	5.0439	8.791923262628181	0.3M			80.45585	7.3140600000000004	9.0907746298125	0.4M	90.92499000000001	7.96563	8.760660848024287	0.3M
	75.24698000000001	5.23464	6.956611414836847	YE	61.343019999999996	4.26731	6.95647198328351	0.3M			64.04274000000001	4.90382	7.657105239407307	0.4M	71.32579	5.25599	7.368989533799766	0.3M
	74.60045	4.6761	6.268192752188492	YE	62.31705	4.06548	6.523864656622866	0.3M			75.30232	6.02535	8.001546300299912	0.4M	85.15878000000001	6.655010000000001	7.814825435498254	0.3M
	73.81786	5.60543	7.593595912967404	YE	61.21966	5.35836	8.752678469628874	0.3M			77.38531	6.09706	7.878833851024179	0.4M	84.82765	6.77948	7.992063908407224	0.3M
	81.30236	6.103190000000001	7.5067808609737785	YE	68.82607	4.49869	6.536316834594798	0.3M			70.8464	5.17847	7.309432801102102	0.4M	80.75934000000001	5.4356	6.730614688034844	0.3M
	76.5815	4.95627	6.471889424991676	YE	62.06326	4.37528	7.049710247254174	0.3M			66.89189	5.902880000000001	8.82450772432951	0.4M	71.75538	6.24385	8.701577498439839	0.3M
	97.35158	6.634	6.814475943790538	YE	82.01754	5.51463	6.723720316410368	0.3M			108.7765	7.99631	7.351137423984041	0.4M	123.66668	8.072460000000001	6.527594983547711	0.3M
	89.61428000000001	6.902589999999999	7.702555887298318	YE	74.4913	5.86696	7.876033845563173	0.3M			107.02838999999999	8.49371	7.935941108709568	0.4M	115.9053	8.35565	7.20903185617914	0.3M
	102.80483000000001	8.00809	7.789604826932741	YE	86.62469	6.60314	7.622699717597834	0.3M			156.16295	6.209569999999999	3.9763400985957293	0.4M	175.55878	6.38971	3.639641378232407	0.3M
	98.55083	7.61747	7.729483353920003	YE	82.18218	5.988519999999999	7.286883847568901	0.3M			76.17441	6.22717	8.174884452665928	0.4M	89.12295999999999	7.19745	8.075865074499323	0.3M
	67.51996	4.6308	6.858416385317764	YE	54.65185	3.51681	6.434933126691959	0.3M			112.74736000000001	8.70931	7.724624328232607	0.4M	126.11731	10.11546	8.020675353763888	0.3M
	58.366969999999995	4.03867	6.919444336411501	YE	48.69075	3.16529	6.500803540713586	0.3M			76.63512	6.53895	8.53257618700147	0.4M	84.79041	6.4025099999999995	7.550983654873233	0.3M
	88.69869	7.006530000000001	7.899248568383592	YE	71.68825	5.73203	7.9957733659281685	0.3M			66.99673	6.7896600000000005	10.134315510622685	0.4M	68.24391999999999	6.7632	9.910333404060028	0.3M
	96.18021999999999	6.8108699999999995	7.081362467251583	YE	78.86713	5.50935	6.985609847854233	0.3M			69.4821	5.24242	7.544993602668888	0.4M	78.03905	6.04879	7.750978516524739	0.3M
	84.93798000000001	6.7951	8.000072523504796	YE	68.72716	5.91916	8.612548517936723	0.3M			74.63587	5.80406	7.77650210280928	0.4M	83.62365	5.9428	7.106602019883132	0.3M
	85.3227	6.07016	7.114355265363144	YE	67.49497	5.01921	7.436420817729085	0.3M			67.47595	5.90002	8.743885784490622	0.4M	74.70661	5.73698	7.679347249192542	0.3M
	72.63434000000001	6.50891	8.961202098070967	YE	58.658030000000004	5.04068	8.593333257185758	0.3M			70.54307	6.5035	9.219190488874386	0.4M	81.25016	6.44474	7.9319720724242275	0.3M
	68.0716	5.89382	8.658265708459915	YE	56.69696999999999	5.16755	9.11433185935686	0.3M
	80.76874000000001	5.57247	6.8992904928317556	YE	64.14774	4.70335	7.33205877557027	0.3M			112.42642	8.33885	7.417162264884003	0.4M	99.38968	7.71736	7.764749821108189	0.5M
	74.17149	5.28796	7.129370058495521	YE	60.18439	4.11494	6.837221412396137	0.3M			97.39551999999999	8.14075	8.35844400235247	0.4M	87.13409	7.231	8.298703756474648	0.5M
	78.16983	5.73383	7.335093347395024	YE	65.00299	5.07775	7.811563744990807	0.3M			91.47543	6.4628	7.065066543005044	0.4M	82.57401999999999	5.93176	7.183566937881915	0.5M
	87.92832	6.5439300000000005	7.442346220193905	YE	73.09739	4.96546	6.7929374769742115	0.3M			102.0167	8.76604	8.592750010537491	0.4M	88.79727	6.84398	7.707421635822813	0.5M
	83.99099	6.2281	7.415200130394941	YE	68.56645999999999	5.03254	7.339652652331767	0.3M			83.88468	6.0181	7.174253987736496	0.4M	73.61276	4.975630000000001	6.759195009126137	0.5M
	78.20653	6.828069999999999	8.730818257759294	YE	61.77392	5.34731	8.656258174970926	0.3M			92.45768000000001	7.481839999999999	8.092177956444504	0.4M	77.85385	6.54242	8.403463669426753	0.5M
											106.87183999999999	8.55227	8.002360584415877	0.4M	95.27762	7.485869999999999	7.856902806766164	0.5M
	113.82658	8.1145	7.128827027922652	YE	89.94832	6.14176	6.828098623743056	0.4M			86.14724	7.3044899999999995	8.479076056296174	0.4M	72.91086999999999	5.74406	7.878194293937243	0.5M
	91.03849	6.13819	6.742411918299612	YE	70.40464	5.1001	7.2439827829529415	0.4M			95.2583	6.09315	6.396450493027904	0.4M	83.58775	5.8407	6.987507140699445	0.5M
	78.53771	5.1237699999999995	6.523961546625181	YE	62.293890000000005	4.182119999999999	6.713531616022052	0.4M			100.53774	7.31836	7.2792167399028465	0.4M	89.62597	6.565810000000001	7.325789612095692	0.5M
	71.87156999999999	5.16843	7.191202307115317	YE	54.31175	4.04546	7.44859077455615	0.4M			104.46876999999999	8.81748	8.440302302783884	0.4M	92.79946	7.5007399999999995	8.082740998708397	0.5M
	78.57726	6.00323	7.639907525408751	YE	60.257130000000004	3.9500699999999997	6.555357017501497	0.4M			102.6197	7.113169999999999	6.931583311976159	0.4M	91.79951	6.7577	7.3613682687413045	0.5M
	73.39423000000001	6.36608	8.673815366684819	YE	55.536719999999995	5.61307	10.106952661230263	0.4M			144.70958000000002	9.657	6.673366061873718	0.4M	127.60263	8.65334	6.781474645154257	0.5M
	80.30566999999999	5.79089	7.211059941346607	YE	63.64208000000001	5.08464	7.989430892264991	0.4M			89.68972	6.888780000000001	7.680679569520343	0.4M	76.77423	5.17746	6.743747218304892	0.5M
	74.54732	6.39268	8.575331749015257	YE	60.93959	4.99745	8.200662328053077	0.4M			99.72203	8.05615	8.078606101380007	0.4M	87.52785	7.172839999999999	8.194923101618512	0.5M
	68.20297	5.6941	8.348756659717312	YE	49.97807	4.22377	8.451246716809994	0.4M			95.38252	7.956230000000001	8.341392112517052	0.4M	84.45223	6.510619999999999	7.709233965757919	0.5M
	93.02443000000001	7.2441699999999996	7.787384453739731	YE	72.78071	5.6790400000000005	7.802946687384611	0.4M			112.15964	9.1883	8.192162528339072	0.4M	98.51156	7.7519800000000005	7.869106935267293	0.5M
	81.79415999999999	7.0539	8.62396532955409	YE	65.0235	4.70937	7.2425661491614575	0.4M			131.47274	8.8963	6.766649877381425	0.4M	113.33715	8.44036	7.447125677679385	0.5M
	90.30228000000001	6.848489999999999	7.5839613351955215	YE	71.59416	5.2867	7.384261509597989	0.4M			102.42778	8.65421	8.44908480882823	0.4M	87.31886999999999	7.14093	8.177991767415223	0.5M
	99.58116	7.72242	7.754900625781021	YE	75.96361999999999	5.35887	7.054521624956789	0.4M			100.72954	8.28641	8.226395156773277	0.4M	87.77521999999999	6.905810000000001	7.867607737126721	0.5M
	108.26624	7.1242600000000005	6.580315341144202	YE	78.74851	5.86527	7.448102827596357	0.4M			83.8436	6.413069999999999	7.648848570433521	0.4M	71.67605	6.4374199999999995	8.981270591780657	0.5M
	65.47667	5.18254	7.915094032729521	YE	51.5395	3.5934	6.972128173536802	0.4M			94.5438	7.2492600000000005	7.66762072182417	0.4M	81.48137	5.8966400000000005	7.236795355797283	0.5M
	70.64765	5.772880000000001	8.171368757488748	YE	54.552690000000005	4.045059999999999	7.414959738923963	0.4M			81.42985	7.2556	8.910246058417153	0.4M	73.00559	6.10346	8.360263919516301	0.5M
	68.38494	4.76926	6.974137873046317	YE	52.94523	4.2268099999999995	7.983363184936583	0.4M			102.48597	7.70565	7.518736467050076	0.4M	89.52306	5.97394	6.673073954353213	0.5M
	72.76711999999999	5.64537	7.7581330688915555	YE	58.26558000000001	4.49329	7.711739932907215	0.4M			72.73708	6.717910000000001	9.23588079147527	0.4M	70.5055	6.49183	9.207551183950189	0.5M
	70.88011999999999	6.026730000000001	8.502708516859173	YE	52.63341	4.8263300000000005	9.169707985859173	0.4M			80.24046	6.40616	7.9837029847535765	0.4M	74.3791	6.16538	8.289129607645158	0.5M
	93.74548	6.87752	7.3363750444288085	YE	70.7829	5.3339300000000005	7.5356194787159065	0.4M			76.59472	6.1438	8.021179527779461	0.4M	73.48101	5.09645	6.935737546340204	0.5M
	90.48088	6.239240000000001	6.895644693110854	YE	69.50343000000001	5.5574699999999995	7.995965091219237	0.4M			80.65496999999999	6.52804	8.093785169097453	0.4M	70.61477	6.23219	8.825618209901414	0.5M
	143.57295	9.8462	6.857977077158337	YE	96.12895	8.0447	8.36865481210395	0.4M			68.08135	5.16908	7.592505142744672	0.4M	61.46096	5.29854	8.620984768217092	0.5M
	85.80887	6.683439999999999	7.788751908747894	YE	63.68789	4.62061	7.255084129808666	0.4M			90.30994	7.36375	8.15386434760116	0.4M	83.464	5.6589	6.780048883350906	0.5M
	93.92251999999999	8.11812	8.64342225911315	YE	70.13528000000001	6.78142	9.669056714395378	0.4M			68.58966	4.988169999999999	7.27248101244415	0.4M	64.08906999999999	4.544919999999999	7.091568031803239	0.5M
	67.10055	6.0906199999999995	9.076855554835243	YE	50.15661	4.7778599999999996	9.525883029176013	0.4M			94.11286	7.84998	8.341027995536423	0.4M	80.67358	7.323119999999999	9.077469972201554	0.5M
	63.09094	4.262519999999999	6.756152309666014	YE	45.504129999999996	3.3079400000000003	7.269537951829869	0.4M			80.51188	7.5057100000000005	9.322487563326058	0.4M	72.92971	6.6523	9.121522627746636	0.5M
	65.40975999999999	4.44111	6.789674813055423	YE	50.38216	3.7510800000000004	7.445254431330456	0.4M			88.37626999999999	5.868	6.639791428174102	0.4M	76.09492	5.64723	7.421296980140067	0.5M
	109.79446999999999	7.6872300000000005	7.001472842849007	YE	83.89225	5.57367	6.643843740035581	0.4M			78.15918	6.27039	8.022589285097412	0.4M	75.7221	6.091819999999999	8.044969698410371	0.5M
	91.7021	7.35076	8.015912394590746	YE	66.59682	5.649859999999999	8.483678349807093	0.4M			102.15385	7.8782	7.712093083129025	0.4M	97.35191999999999	7.501580000000001	7.705631280821171	0.5M
	97.92566	7.690869999999999	7.853784186902595	YE	73.49121	6.05893	8.244428143175218	0.4M			77.28038000000001	6.22551	8.055744549910338	0.4M	79.50219	5.43184	6.832314933714405	0.5M
	68.49944	6.1050699999999996	8.912583810904145	YE	52.2845	4.35352	8.326597748854821	0.4M			69.36371	5.66381	8.165379273974821	0.4M	76.19272	5.147069999999999	6.75533043051882	0.5M
	68.1788	4.52957	6.643663426167665	YE	54.264630000000004	3.52028	6.487245927964495	0.4M			85.2041	5.43156	6.374763655739573	0.4M	75.53792	5.63815	7.4639995382451625	0.5M
	66.68972	5.76624	8.646370085224529	YE	47.56815	3.7046699999999997	7.788131344187234	0.4M			95.76745	7.582339999999999	7.917450031299779	0.4M	83.02897	7.51796	9.05462274191767	0.5M
	73.05851	5.93339	8.121422131384831	YE	56.55515	4.56002	8.062961551688927	0.4M			87.16073	7.428089999999999	8.522289797251583	0.4M	65.38035	7.20281	11.016781035892283	0.5M
	71.49393	5.817080000000001	8.136466969993117	YE	54.85703	5.41079	9.86343956280535	0.4M
	72.27875	5.1287400000000005	7.095778496446051	YE	53.94229	4.12714	7.65102853438369	0.4M			96.72763	6.6017399999999995	6.825081933672932	0.4M	79.95509	4.82637	6.036351156630553	0.6M
	76.77705	4.50589	5.868798032745462	YE	57.96706999999999	4.15228	7.163170400021945	0.4M			95.60458	6.6253899999999994	6.929992266060893	0.4M	88.23761	5.12974	5.813552746952235	0.6M
	60.7185	4.95702	8.163936856147632	YE	46.988459999999996	3.6103400000000003	7.68346100297818	0.4M			91.3284	5.6448599999999995	6.180837505091516	0.4M	71.93802	4.54057	6.3117806133668966	0.6M
	85.01209	5.79315	6.814501325634977	YE	64.02096	4.55957	7.1219956714176105	0.4M			88.79756	5.48093	6.172388070122647	0.4M	72.91328	4.18444	5.738927119997895	0.6M
	116.64326000000001	8.02433	6.879377342505688	YE	90.444	5.66861	6.267535712706204	0.4M			71.51124	4.48119	6.266413503667395	0.4M	61.33024	3.78785	6.17615388428286	0.6M
	104.99691000000001	8.17963	7.790353068485538	YE	80.17435	6.15529	7.677380608636053	0.4M			87.24842	6.043419999999999	6.9266813083835785	0.4M	73.57633	4.86048	6.606037566701138	0.6M
	115.94514	8.65703	7.4664880304599235	YE	89.25458	6.1673800000000005	6.90987510108725	0.4M			93.92624	7.025710000000001	7.480029009997632	0.4M	57.720180000000006	4.48185	7.76478867529519	0.6M
	86.91593	6.07828	6.993286501105149	YE	65.79978	4.552230000000001	6.918305805885675	0.4M			76.67936999999999	4.95329	6.459742692200002	0.4M	64.83729	4.33396	6.684363273048581	0.6M
	93.30709	5.9794599999999996	6.40836618096224	YE	72.92739	4.66628	6.39852872836941	0.4M			85.91516	6.26964	7.2974781167840455	0.4M	72.97319	4.71477	6.460961895731843	0.6M
	76.51175	5.34974	6.992050240649311	YE	58.030440000000006	4.48491	7.728547293454952	0.4M			72.01415	5.1948300000000005	7.2136239891743505	0.4M	58.28323	3.79631	6.5135545850839085	0.6M
	61.69511	4.72547	7.659391481756009	YE	48.10048	3.53332	7.3457063214337985	0.4M			73.16037	5.35171	7.31503954941726	0.4M	59.11756	4.103280000000001	6.9408818631892135	0.6M
	80.2839	6.289680000000001	7.83429803484883	YE	59.50756	5.00824	8.416140739092647	0.4M			72.42911	5.34054	7.373471798838893	0.4M	58.39518	4.651619999999999	7.9657601877415205	0.6M
	58.677769999999995	4.4291	7.548173695080779	YE	45.836059999999996	3.2319400000000003	7.051085979030485	0.4M			81.99257	5.37944	6.56088716331248	0.4M	68.88939	3.90884	5.67408130627953	0.6M
	61.618159999999996	4.8815	7.922177487935375	YE	46.78047	4.11118	8.788240049747255	0.4M			105.16559	8.73705	8.307898049162278	0.4M	89.92115	8.40468	9.346722100417978	0.6M
	63.2067	5.70901	9.032286134223112	YE	47.87021	3.76185	7.858436384548971	0.4M			73.03112	5.68118	7.779122105754369	0.4M	59.933780000000006	4.5155	7.5341485219186906	0.6M
	67.3297	5.65458	8.39834426709164	YE	50.49657	4.346769999999999	8.608050012109732	0.4M			104.9345	7.90955	7.537606792808847	0.4M	90.53872	6.72739	7.430401048302869	0.6M
	66.10614	4.99945	7.56276194616718	YE	48.77669	3.4741400000000002	7.122541525470466	0.4M			52.83975	4.8025400000000005	9.088877218381995	0.4M	45.63948	4.11503	9.016382307598597	0.6M
	70.50359	5.24806	7.443677690738867	YE	55.0425	4.41009	8.012154244447474	0.4M			60.98369	4.55031	7.4615196292648065	0.4M	49.45333	3.9649300000000003	8.017518739385194	0.6M
	67.73791	5.2470300000000005	7.746076015631425	YE	51.29933	3.6920300000000004	7.1970335674949375	0.4M			73.46421	5.59691	7.618553306433161	0.4M	62.94106	4.5197199999999995	7.180876839379572	0.6M
	71.84731	4.9148	6.840617971640135	YE	50.94235	3.90269	7.660993260028248	0.4M			70.15464	5.2053199999999995	7.419780074418456	0.4M	59.40494	4.4283	7.454430557458689	0.6M
	67.44991999999999	4.83121	7.162662313016828	YE	52.198879999999996	3.2881400000000003	6.29925393035253	0.4M			93.97492	6.982939999999999	7.430642133028684	0.4M	74.74932	5.32238	7.120305576023969	0.6M
	72.05371	5.52608	7.669389959240129	YE	52.67191999999999	4.19183	7.958377063148641	0.4M			53.84401999999999	5.1052599999999995	9.481572884045434	0.4M	46.1745	3.7556199999999995	8.133536908899933	0.6M
	93.27533000000001	7.21667	7.73695466957876	YE	71.95872	5.01845	6.974067910046204	0.4M			67.96069	5.47432	8.055127162481721	0.4M	58.88045	4.09136	6.948588198629596	0.6M
	99.88304000000001	8.21523	8.224849784307725	YE	73.31121	6.04251	8.242272907513053	0.4M			61.483940000000004	4.98503	8.10785710870188	0.4M	51.10021	4.16271	8.146170045093747	0.6M
	66.64518000000001	5.6373	8.458676231349362	YE	50.12573	4.30882	8.596024436950845	0.4M			94.88176	4.68138	4.933909320400465	0.4M	74.9337	4.64675	6.201148481924688	0.6M
											74.87821	5.59541	7.47268130474807	0.4M	62.22158	4.37718	7.03482618088451	0.6M
	137.67266	10.992519999999999	7.984533748385481	YE	98.64244000000001	7.28562	7.385887859221649	0.5M			63.33518	6.09578	9.624635155374945	0.4M	57.3275	4.60647	8.035358248659021	0.6M
	114.19039	8.431239999999999	7.383493479617679	YE	79.98816	5.9025300000000005	7.379254629685194	0.5M			89.24534	8.39147	9.402698224915722	0.4M	72.10968000000001	6.00526	8.32795264103238	0.6M
	92.32218	7.64946	8.2856145727928	YE	64.74006999999999	6.01538	9.291587111351596	0.5M			108.15258	9.02689	8.346439816784768	0.4M	90.16394	6.555910000000001	7.271099732332018	0.6M
	115.71812	10.35463	8.948149174908822	YE	98.99549	7.168239999999999	7.240976331346002	0.5M			104.85762	8.22755	7.846401625365902	0.4M	85.3197	6.40497	7.507023583064639	0.6M
	118.97764	8.317219999999999	6.990574027186956	YE	84.05023	5.83419	6.941313545483458	0.5M			71.30426	4.8633	6.820490108164645	0.4M	58.795359999999995	6.02998	10.255877334537965	0.6M
	94.78623	7.03295	7.4198013783225685	YE	65.94086	5.14182	7.797623506881772	0.5M			80.02665999999999	6.94685	8.680669666833529	0.4M	69.16427	6.25922	9.049788279410741	0.6M
	93.8755	7.0804100000000005	7.542340653312101	YE	66.41086	4.9991	7.527533900328953	0.5M			70.1105	5.4076900000000006	7.713095755985195	0.4M	57.97685	4.12334	7.11204558371143	0.6M
	72.15601	4.85377	6.726771616113475	YE	52.927209999999995	3.7407800000000004	7.0677823372892705	0.5M			85.57914	7.09278	8.287977654367642	0.4M	68.68344	5.8960099999999995	8.584325421091313	0.6M
	80.47519	6.62142	8.227902288891768	YE	56.721	4.9227	8.678796213042789	0.5M			80.96938	6.90291	8.525333897826561	0.4M	62.08813000000001	5.49127	8.844315330482653	0.6M
	108.73411000000002	8.539010000000001	7.853110675205784	YE	78.43944	5.85393	7.462993106529062	0.5M			87.65209	7.8236300000000005	8.925776898189193	0.4M	71.70796999999999	6.1978800000000005	8.643223340445982	0.6M
	109.69091	8.11063	7.394076683291259	YE	78.79964	5.5199	7.004981241031051	0.5M			62.58511	5.34299	8.537158439123939	0.4M	53.12667	4.0160599999999995	7.559404720830422	0.6M
	68.40985	5.36984	7.849512899092746	YE	50.289190000000005	3.8549800000000003	7.66562356641656	0.5M			73.39843	6.07456	8.27614432624785	0.4M	59.416869999999996	5.03664	8.476784455323886	0.6M
	116.96441000000002	9.538039999999999	8.154651487576432	YE	81.15565	6.98458	8.606400170536494	0.5M			108.01098999999999	7.74494	7.170511074845254	0.4M	94.17900999999999	6.34858	6.7409712631296514	0.6M
	76.88217	6.39114	8.31290271853669	YE	53.551930000000006	5.09473	9.513625372605619	0.5M			73.94951	5.91064	7.992804820478187	0.4M	64.62463000000001	5.1895	8.030220056965895	0.6M
	120.34513999999999	8.85565	7.35854393455357	YE	81.90123	6.583	8.03773032468499	0.5M			70.48603	5.818630000000001	8.255011666850864	0.4M	59.11796999999999	4.81642	8.147133604215437	0.6M
	135.01891	10.00376	7.409154762099619	YE	91.83758	7.511080000000001	8.178656275568237	0.5M			57.492459999999994	5.30459	9.2265837989886	0.4M	49.79939	4.0982199999999995	8.229458232319711	0.6M
	122.65303	9.49575	7.741961205524232	YE	83.43433	6.40688	7.678949420460379	0.5M			73.09272	6.11958	8.372352267093083	0.4M	63.186859999999996	4.32793	6.849414577651114	0.6M
	74.16619	5.55583	7.491054886330281	YE	49.54195	3.8135199999999996	7.697557322632637	0.5M			94.03174	8.481119999999999	9.019422590712454	0.4M	75.78995	6.436780000000001	8.492920235466576	0.6M
	75.8971	5.79545	7.635930753612458	YE	54.758869999999995	4.184880000000001	7.642378303277626	0.5M			109.97867	9.494530000000001	8.633064938864965	0.4M	93.98928000000001	7.42665	7.901592607156902	0.6M
	80.95087	6.05152	7.475546587701899	YE	56.1396	4.332409999999999	7.71720853016409	0.5M			57.07236999999999	4.6353599999999995	8.121898564927301	0.4M	46.97925	3.6823300000000003	7.83820516504627	0.6M
	72.05812	5.43206	7.538442579406734	YE	49.2514	4.06007	8.243562619539748	0.5M			92.84577	7.932760000000001	8.544018752819865	0.4M	73.7278	6.10593	8.281720056749284	0.6M
	101.00728000000001	7.31005	7.237151619170421	YE	70.07571999999999	5.03222	7.18111779657776	0.5M			59.27109	6.2948900000000005	10.620506557244012	0.4M	50.5527	4.28924	8.484690234151687	0.6M
	69.44615999999999	5.63994	8.121312971084363	YE	48.05563	4.06604	8.461110592036771	0.5M			80.64577	7.152989999999999	8.869640651952357	0.4M	67.94906	5.70038	8.389196259668639	0.6M
	108.80431000000002	7.5509	6.939890524557344	YE	79.73796	5.43698	6.818559190628905	0.5M			76.8491	6.31494	8.217324601068848	0.4M	65.53671	4.98153	7.601129199192331	0.6M
	100.43368000000001	6.916530000000001	6.886663915929398	YE	68.44689	4.99595	7.299016799740646	0.5M			88.15303	7.7013300000000005	8.736319103268487	0.4M	71.6784	5.609319999999999	7.8256769124310805	0.6M
	102.78961	8.19865	7.976146616374943	YE	72.71139000000001	5.377280000000001	7.395375057470363	0.5M			97.64643000000001	8.461089999999999	8.665027487436046	0.4M	81.84810999999999	7.186789999999999	8.780642582950298	0.6M
	121.10458	8.361089999999999	6.904024604189204	YE	80.74644	5.8689	7.268308051723395	0.5M			108.30925	8.0087	7.3942899613837225	0.4M	88.54205	6.6696800000000005	7.5327824463065856	0.6M
	81.95217	5.80628	7.084961874713019	YE	58.30392	4.759930000000001	8.16399652030258	0.5M			67.6184	6.16006	9.110035138364706	0.4M	58.373380000000004	4.22777	7.242633542892324	0.6M
	74.08748	6.2457400000000005	8.430223298187494	YE	49.33273	3.9685599999999996	8.044476760154971	0.5M			80.66506	6.664039999999999	8.261371156235425	0.4M	65.47756	4.99685	7.631393106279464	0.6M
	80.61932	6.08472	7.547471251307999	YE	55.61176	4.18631	7.527742333635907	0.5M			111.80049	7.85423	7.025219656908481	0.4M	90.84931	5.46189	6.012032452420387	0.6M
	121.23087	9.52317	7.855400196336132	YE	85.00593	5.98499	7.04067351536534	0.5M			122.39899	9.78025	7.990466261200359	0.4M	102.14052	8.04384	7.875268306838461	0.6M
	83.4705	6.59957	7.906469950461541	YE	59.385040000000004	4.4815	7.546513397987101	0.5M			73.34983000000001	6.18799	8.436270404444016	0.4M	62.77455	5.00427	7.971813418017333	0.6M
	102.81193	6.68005	6.497349091686148	YE	68.71704	4.8337	7.034208691177618	0.5M			62.5114	4.96755	7.94663053459049	0.4M	51.48968	3.73274	7.2494915485977005	0.6M
	101.54388	7.24953	7.139307656945943	YE	52.38393	4.93467	9.420198140918407	0.5M			109.69417	7.318560000000001	6.671785747592603	0.4M	91.8078	6.3377	6.90322608754376	0.6M
	110.63836	8.98214	8.118468133475586	YE	80.0341	6.67948	8.345792605901735	0.5M			107.57595	6.737660000000001	6.2631656982810755	0.4M	93.75525999999999	5.79526	6.181263856555889	0.6M
	73.95208000000001	6.4589099999999995	8.733912555265515	YE	52.50215	4.59396	8.750041664960387	0.5M			66.21725	5.09702	7.697420234153486	0.4M	57.47626999999999	5.115419999999999	8.900055622955353	0.6M
	96.21986	7.11725	7.396861728961153	YE	66.21536	5.143269999999999	7.767487785311443	0.5M			71.38673	5.501580000000001	7.706726446217667	0.4M	68.02339	6.57959	9.67254057758662	0.6M
	85.19827	6.4436800000000005	7.563158266007046	YE	60.031569999999995	4.82196	8.03237363274024	0.5M			66.17785	5.10653	7.716373378706017	0.4M	57.966969999999996	6.14174	10.59524070345578	0.6M
	97.84781	7.668130000000001	7.836792668124101	YE	64.20045999999999	4.50194	7.01231735722766	0.5M			61.68955	4.82969	7.829024526844498	0.4M	54.22602	5.36974	9.902515434472233	0.6M
	122.62558	8.55757	6.978617348843528	YE	86.97623	6.37964	7.334923576246062	0.5M			85.22274	5.18127	6.079680141708656	0.4M	71.54399000000001	5.46624	7.640390199092893	0.6M
	122.71101999999999	9.86111	8.036042728680766	YE	86.3458	6.99299	8.09881893502637	0.5M			105.4989	7.378769999999999	6.994167711701259	0.4M	90.29538000000001	7.0712	7.831186933373556	0.6M
	93.35132	6.697439999999999	7.174445953201304	YE	58.62319	4.7917	8.173727837055608	0.5M			56.12562	3.98189	7.094603142023198	0.4M	43.1477	3.66355	8.490719088155336	0.6M
	125.72867	9.76242	7.764672926230748	YE	88.21268	7.30812	8.284659302948283	0.5M			83.19447	4.7545	5.714923119289058	0.4M	68.53430999999999	4.43201	6.466848502596729	0.6M
	120.19792	6.89847	5.739259048742274	YE	83.84777	4.94555	5.898248695224692	0.5M			70.73621	5.11707	7.234017768268897	0.4M	61.778209999999994	5.01221	8.113232804899981	0.6M
	98.01138	6.9908	7.132641127999626	YE	65.33501	4.7738	7.306649222216388	0.5M			80.77943	5.54306	6.861969687084941	0.4M	69.49725	5.39895	7.768580771181595	0.6M
	117.23255	7.559019999999999	6.447884994397886	YE	79.63251	5.3575800000000005	6.727880359416023	0.5M			65.87996	4.18967	6.3595515237107	0.4M	55.538740000000004	4.0364	7.267719793427075	0.6M
	97.08415	7.28608	7.504911975847757	YE	66.54011	4.89467	7.355969204138677	0.5M			78.05790999999999	5.48343	7.024822980784395	0.4M	67.39729	4.7790099999999995	7.090804392876923	0.6M
	82.09978000000001	6.32886	7.708741728662366	YE	51.86869	3.9697199999999997	7.653403238061342	0.5M			94.19700999999999	6.690760000000001	7.102943076430984	0.4M	75.62533	7.157439999999999	9.464342172126718	0.6M
	85.2031	6.06084	7.113403150824324	YE	61.277409999999996	4.55906	7.440033774273423	0.5M			124.84426	8.94203	7.162547961756512	0.4M	104.27752	8.399980000000001	8.055408298931544	0.6M
	74.02728	6.38371	8.623456109693615	YE	51.53309	4.25593	8.258635373892776	0.5M			82.50962	5.56002	6.738632416438229	0.4M	68.19333	5.26785	7.724875731981412	0.6M
	75.79723	6.02022	7.9425329923006425	YE	52.77085	4.191	7.94188458211304	0.5M			86.6771	6.84201	7.8936766458499426	0.4M	71.06003	6.1063	8.593157081414123	0.6M
	83.31441	6.19624	7.437176834115491	YE	56.52616	4.32251	7.646919585551186	0.5M			67.3307	4.3211699999999995	6.417830202270287	0.4M	58.082069999999995	4.8724099999999995	8.38883669263165	0.6M
	107.19555	8.62598	8.046957173128924	YE	75.37749000000001	6.595960000000001	8.750569964587571	0.5M			62.69894	3.74606	5.974678359793642	0.4M	55.86244	4.26819	7.640536288783661	0.6M
											106.77445	8.13038	7.614536998317482	0.4M	93.49717	6.89193	7.371271237407508	0.6M
	81.81392	6.22206	7.605136143091543	YE	54.10657	5.23899	9.682724297622268	0.6M			72.29032	6.3794	8.824694647914134	0.4M	60.24929	6.55463	10.879182144719051	0.6M
	82.01290999999999	6.927	8.446231209208404	YE	54.20006	4.9918	9.209952904111175	0.6M			76.2173	5.49286	7.206841491367447	0.4M	67.90217	5.050730000000001	7.438245346209113	0.6M
	69.36418	6.8417699999999995	9.863549169037967	YE	46.57648	4.52	9.704468864972192	0.6M			55.74584	4.13899	7.424751335705048	0.4M	48.07356	2.99646	6.233072815909618	0.6M
	91.07209	7.1261399999999995	7.824724347492189	YE	58.6501	4.99134	8.51036912128027	0.6M			104.84645	8.46273	8.071546533049045	0.4M	91.25777	6.79777	7.448976673438327	0.6M
	77.93848	6.679989999999999	8.57084972660488	YE	50.40705	4.136830000000001	8.20684805002475	0.6M			73.30197	6.21363	8.476757173101896	0.4M	58.68	5.1673800000000005	8.806032719836402	0.6M
	119.23746000000001	9.14846	7.672471386089572	YE	75.2194	6.7565	8.982390181256433	0.6M			123.36493	7.144639999999999	5.791467639952455	0.4M	103.79065	6.598339999999999	6.3573549255159305	0.6M
	114.98767	9.02177	7.84585860379639	YE	77.10826999999999	6.2756	8.13868603199112	0.6M			105.09676	7.356089999999999	6.999349932386116	0.4M	92.64012	6.468030000000001	6.981888624496602	0.6M
	111.42116000000001	8.72364	7.8294284496768825	YE	71.16198	5.98348	8.408253958082673	0.6M			68.34402	4.33055	6.336399292871563	0.4M	59.53869	4.29505	7.213880587564153	0.6M
	102.02286	8.25435	8.090686734326013	YE	70.58563000000001	5.8148	8.237937381872202	0.6M			81.30624	5.42382	6.670853307200038	0.4M	68.78161	4.58596	6.667421713449278	0.6M
	127.00641	9.0239	7.105074460415029	YE	80.93217	5.58283	6.898159285732731	0.6M			104.42331	7.5442	7.224632124762182	0.4M	88.89636999999999	6.6714199999999995	7.504715884349383	0.6M
	130.64902	9.14073	6.996401503815336	YE	84.3291	6.03129	7.152086290497587	0.6M			86.93902	6.0784199999999995	6.991590197359023	0.4M	73.79766	5.35998	7.263075821103272	0.6M
	88.44795	7.62015	8.615406009975358	YE	58.26271	4.96162	8.515944417964768	0.6M			85.47835	5.8171	6.805348956782624	0.4M	77.36978	6.74379	8.71631016657925	0.6M
	92.2175	7.281280000000001	7.895768156803211	YE	62.46745	4.52771	7.248110816113032	0.6M			64.46138	4.35286	6.752663377668923	0.4M	53.87154	4.01585	7.454492669041947	0.6M
	74.77589	6.08703	8.140364494491473	YE	47.963770000000004	3.3471599999999997	6.978517326723899	0.6M			114.63877	8.81226	7.6869805912955975	0.4M	95.90999000000001	6.9141	7.208946638405446	0.6M
	90.90606	7.43036	8.173668510108127	YE	55.55271	4.57937	8.243288221222691	0.6M			114.44685	7.96812	6.962288608205467	0.4M	95.7973	6.42831	6.710324821263229	0.6M
	79.5624	7.011830000000001	8.812994580354541	YE	51.86716	3.9946599999999997	7.701713377019292	0.6M			85.31359	6.41456	7.518802104096194	0.4M	74.31275	5.51633	7.4231272560899715	0.6M
	74.76859	6.599660000000001	8.826781406470285	YE	47.24334	4.07279	8.620876508731177	0.6M			91.87849	6.07061	6.607215682364828	0.4M	80.29205	5.28498	6.582195871197709	0.6M
	109.53482	7.98528	7.2901749416304344	YE	66.13088	3.8820300000000003	5.870222806652505	0.6M			75.05913000000001	5.32523	7.094713194783899	0.4M	65.62881	4.35993	6.643317165129156	0.6M
	79.49783000000001	5.95593	7.4919403460446645	YE	50.110440000000004	3.93669	7.856027606223373	0.6M			108.89198999999999	7.52365	6.909277716386669	0.4M	94.66960999999999	6.42889	6.790869847250877	0.6M
	81.7881	6.17932	7.555280046852782	YE	52.64546	4.245369999999999	8.064076180548142	0.6M			122.57981000000001	4.692480000000001	3.828101870936168	0.4M	100.93384	4.18899	4.150233459858458	0.6M
	88.07019	6.90406	7.839270018606751	YE	56.71366	3.99326	7.0410902770161545	0.6M			81.40621999999999	4.99896	6.140759268763494	0.4M	68.2623	4.66654	6.8361892289008725	0.6M
	110.20041	8.27374	7.507903101267953	YE	70.71085	5.04478	7.13437895315924	0.6M			70.83439	4.67507	6.600000367053347	0.4M	65.30077	3.8107599999999997	5.83570454069684	0.6M
	88.30381	6.79673	7.696983856075973	YE	54.679759999999995	3.88291	7.10118332633501	0.6M			102.57271999999999	8.78887	8.56842833065166	0.4M	81.53944	6.66822	8.177907525487052	0.6M
	72.30829	5.4897	7.592075542098977	YE	43.33319	3.25333	7.507709448577407	0.6M			83.83369	6.8405	8.15960743228647	0.4M	68.25779	6.16151	9.026823165531729	0.6M
	76.00249000000001	5.78552	7.612276913559016	YE	47.24965	3.63406	7.691189246904474	0.6M			77.94089	7.521839999999999	9.650698112377212	0.4M	61.46313000000001	5.27264	8.57854131411791	0.6M
	83.98706999999999	6.997739999999999	8.331925378513622	YE	52.97926999999999	4.54904	8.58645277671814	0.6M			63.54959	6.5633300000000006	10.327887245220623	0.4M	52.07712	5.27312	10.125598343379972	0.6M
	128.94181	8.75261	6.788030973041251	YE	81.13719	6.31648	7.784938078333746	0.6M			71.59111999999999	5.91427	8.2611782019893	0.4M	57.38925	4.6277099999999995	8.063722735529737	0.6M
	106.72464	8.287180000000001	7.765010966539688	YE	61.51161	5.35149	8.699967372013186	0.6M			83.10407	6.97898	8.397879911296764	0.4M	65.70821	5.57954	8.491389432157717	0.6M
	108.91838	8.5853	7.8823243606818245	YE	68.9216	6.24165	9.05615946234562	0.6M			85.7534	7.367030000000001	8.590947997397189	0.4M	68.50229	5.0061800000000005	7.308047657968807	0.6M
	112.08058	7.64007	6.816586780689393	YE	71.93366999999999	5.72919	7.964545671032773	0.6M			68.69707	5.54016	8.064623425715247	0.4M	58.015480000000004	4.72243	8.13994816555857	0.6M
	84.92886	6.6628	7.845154167852954	YE	52.6279	4.84065	9.197877931667424	0.6M			57.55673	5.07061	8.809760387707918	0.4M	46.98829	4.69969	10.001832371427009	0.6M
	97.54672	6.806360000000001	6.9775385579340865	YE	60.18671	4.9339699999999995	8.197773229339166	0.6M			72.17327	6.71753	9.307504010833927	0.4M	56.704980000000006	5.43549	9.585560210055624	0.6M
	102.10797	7.167110000000001	7.019148456286029	YE	66.15113000000001	5.26388	7.957354621153108	0.6M			105.53475	6.448230000000001	6.1100537974458655	0.4M	87.63731999999999	5.44658	6.21490935596844	0.6M
	109.95316000000001	7.47244	6.796021142093596	YE	70.37086	5.48462	7.793879455217685	0.6M			69.04163	6.20984	8.994341529885665	0.4M	59.55177	5.25176	8.818814285452808	0.6M
	79.23558	6.1569	7.770372855224888	YE	51.94806	5.0036	9.63192850705108	0.6M			78.07624	7.36614	9.434547565302836	0.4M	61.93045	5.56712	8.989309782183078	0.6M
	77.4995	5.66167	7.305427776953399	YE	44.87713	3.96611	8.837708650263508	0.6M			109.15576000000001	8.33946	7.639963296485681	0.4M	86.61279	6.41362	7.404934074978995	0.6M
	87.17225	6.44343	7.3916068473625485	YE	56.59627	4.5612	8.05918835287202	0.6M			82.54985	7.232	8.760766978983002	0.4M	62.27745	5.782109999999999	9.284436019779228	0.6M
	71.78709	5.26207	7.330106290699343	YE	45.888709999999996	3.49168	7.609017555734299	0.6M			67.85901	5.37956	7.927554498658321	0.4M	51.172959999999996	4.0057599999999995	7.827884101290994	0.6M
	71.97175	5.50566	7.649751464984525	YE	44.586290000000005	3.49125	7.830321832114759	0.6M			100.59579000000001	9.34189	9.286561594675085	0.4M	79.38175	7.84722	9.885420767367815	0.6M
	66.83541	5.2175199999999995	7.806520525571699	YE	42.61891	3.4540699999999998	8.104547957702342	0.6M			107.30051999999999	10.00487	9.324157981713418	0.4M	84.04269000000001	7.77911	9.256141134939872	0.6M
	85.41318000000001	7.069	8.276240271115064	YE	51.10624	4.7586	9.311191744882818	0.6M			56.20346	6.23705	11.097270523914364	0.4M	45.21439	4.23421	9.364739853838568	0.6M
	108.04903	7.82994	7.246654597454508	YE	69.60085	4.44281	6.3832697445505335	0.6M			64.23174	5.49132	8.549231267905867	0.4M	48.94125	4.76138	9.728766633463593	0.6M
	100.73012	7.67253	7.616917362949632	YE	66.31512	5.02212	7.573114547632577	0.6M			60.15784	6.44384	10.711554803164475	0.4M	50.6887	4.561640000000001	8.999323320582302	0.6M
	92.82913	8.6312	9.29794343650533	YE	60.764790000000005	4.59012	7.553914034755982	0.6M			62.14875	6.0879900000000005	9.795836601701563	0.4M	53.34155	4.2053	7.883722913938572	0.6M
	88.86824	5.9974099999999995	6.748653962315446	YE	57.71689	4.91089	8.508583882464908	0.6M			77.23033000000001	6.46469	8.370662147889306	0.4M	60.26869	5.16902	8.57662577368116	0.6M
	77.94097	5.41279	6.944730095096328	YE	47.57571	3.6422199999999996	7.655629311680266	0.6M			79.25119000000001	7.126119999999999	8.991814507769535	0.4M	62.07094	5.52502	8.901137956022575	0.6M
	89.75589000000001	7.051989999999999	7.856854853759457	YE	57.98225	4.54898	7.845469949855344	0.6M			66.63659	6.35323	9.534146330116833	0.4M	52.779309999999995	6.36837	12.066034967111165	0.6M
	74.0487	5.680280000000001	7.671005703003566	YE	45.904	3.94337	8.590471418612756	0.6M			60.18965	6.1902800000000004	10.284625346716588	0.4M	49.12673	5.2926	10.773361060261898	0.6M
	70.43916	4.8054	6.822057503241094	YE	43.56	3.10759	7.134044995408631	0.6M			64.90675	5.2374	8.06911453739403	0.4M	52.83863	4.2725	8.08594015401232	0.6M
	64.26388	4.61649	7.1836465523090105	YE	38.760709999999996	2.39562	6.180536940628797	0.6M			104.05778000000001	9.49724	9.126890848526655	0.4M	85.30483000000001	6.860860000000001	8.042756781767222	0.6M
											57.838519999999995	6.2234	10.759957204990723	0.4M	43.852129999999995	4.25166	9.69544694864309	0.6M
	113.55769	8.57627	7.552346300809747	YE	65.57919	4.88696	7.451998110986123	0.7M			81.55793	8.66206	10.620745278846583	0.4M	64.75715	6.956930000000001	10.743107131799349	0.6M
	93.6105	6.991739999999999	7.468969827102728	YE	58.143840000000004	4.27093	7.345455683697533	0.7M			77.82024	8.084769999999999	10.389032467645947	0.4M	58.30955	5.56987	9.55224315742447	0.6M
	99.66033	7.65183	7.6779095553867815	YE	61.06255	4.79991	7.860644535807953	0.7M			141.24868	8.92361	6.31765903936235	0.4M	111.77944	7.190980000000001	6.433186639689732	0.6M
	117.8467	9.374419999999999	7.954758173118126	YE	86.99217	5.90606	6.789185739360221	0.7M			64.07342	5.89341	9.197901407479108	0.4M	51.40619	4.69725	9.137518263851105	0.6M
	72.5416	6.100630000000001	8.409836562744688	YE	44.60983	3.6797199999999997	8.24867523592894	0.7M			76.0067	6.382630000000001	8.397457066284947	0.4M	55.498540000000006	4.52701	8.156989355035284	0.6M
	85.19816999999999	6.050730000000001	7.101948316495532	YE	51.631640000000004	3.55019	6.8759969662013445	0.7M			72.35266	6.23721	8.620567647409231	0.4M	55.55305	4.50525	8.109815752690446	0.6M
	77.45079	6.35621	8.20677232601501	YE	48.191109999999995	3.5500599999999998	7.366628409264697	0.7M			81.78735	7.6576	9.362817110470017	0.4M	63.937780000000004	6.1889400000000006	9.67962916447834	0.6M
	97.89575	8.019639999999999	8.192020593335256	YE	62.93629	4.61905	7.339247356334477	0.7M			111.32382	9.23466	8.295313617516898	0.4M	88.80875	7.515210000000001	8.462240488690584	0.6M
	73.80856999999999	5.38025	7.289465166443411	YE	46.78794	2.85364	6.099093056886026	0.7M			93.36143	8.67345	9.290185465239768	0.4M	71.69803	7.22295	10.074126164972732	0.6M
	105.61163	8.91884	8.444941149000352	YE	69.62345	5.45903	7.840792146898782	0.7M			83.31792	7.33148	8.799403537678328	0.4M	64.99155999999999	4.45942	6.861537098047808	0.6M
	108.38383999999999	7.9916	7.3734239347858495	YE	81.94346	6.2787	7.662234423589142	0.7M			143.28687	12.178989999999999	8.499725062038134	0.4M	109.98491000000001	7.37379	6.704365171549441	0.6M
	85.34313	6.972460000000001	8.16991361812017	YE	52.31962	4.48565	8.57355233084644	0.7M			91.48866	7.32874	8.010544694828846	0.4M	67.21287	5.64962	8.40556280367138	0.6M
	80.48057	7.31355	9.087348660676732	YE	48.34898	3.6716699999999998	7.594100227140261	0.7M			96.28089	8.15906	8.474225778345007	0.4M	78.01241999999999	6.32701	8.110259879132068	0.6M
	97.27524	7.5191	7.729716215554955	YE	58.8616	4.98874	8.475372738763472	0.7M			130.29546000000002	9.56046	7.337523502353804	0.4M	104.20276	6.801880000000001	6.527543032449429	0.6M
	74.50735	6.33168	8.4980609295593	YE	43.790040000000005	3.1268700000000003	7.140596354787526	0.7M			66.07181	5.70483	8.634287451789199	0.4M	51.17151	4.315919999999999	8.434224434651235	0.6M
	73.18777	5.56292	7.600887416025929	YE	43.31103	4.3903300000000005	10.13674807549024	0.7M			101.49893	8.38115	8.257377688612086	0.4M	77.62371	5.7197	7.368496043283682	0.6M
	129.07961	10.59028	8.20445614919351	YE	73.09478	5.9232	8.103451436614215	0.7M			114.06031000000002	7.771380000000001	6.813395474727361	0.4M	90.97768	5.5315199999999995	6.080084697697281	0.6M
	72.26505	5.70541	7.895116657360646	YE	42.1795	3.8047800000000005	9.020448322052184	0.7M			78.183	8.02865	10.269048258572836	0.4M	67.60410999999999	6.5005	9.615539646923835	0.6M
	75.85915	5.0774099999999995	6.693207081808852	YE	42.4182	3.576	8.430343578935458	0.7M			94.79538000000001	8.30733	8.763433407830634	0.4M	77.19266999999999	6.78793	8.793490366378052	0.6M
	88.09475	5.96434	6.770369403398045	YE	65.11083	4.56936	7.017818694677981	0.7M			77.93144000000001	6.48273	8.318504059465601	0.4M	64.10028	5.54326	8.64779373818648	0.6M
	110.72527	8.53934	7.712187109591152	YE	75.34728	5.3286	7.072053563181047	0.7M			67.78744	6.2891	9.27767739864494	0.4M	52.58739	5.47182	10.405194096911826	0.6M
	106.63858	6.59617	6.185538104502141	YE	56.54936	3.68095	6.5092690704191885	0.7M			107.83886000000001	9.073310000000001	8.413766614372593	0.4M	89.8154	6.48496	7.220320791311958	0.6M
	100.68911	6.859560000000001	6.812613598431848	YE	59.21865	4.17779	7.054855184979732	0.7M			64.67423000000001	6.217890000000001	9.614169353079271	0.4M	51.82654	4.0012300000000005	7.720426638552372	0.6M
	115.35269	7.132160000000001	6.182916063769298	YE	59.55791	3.98737	6.694946145692486	0.7M			91.00126	7.66644	8.424542693145128	0.4M	70.51867	4.75741	6.746312714065652	0.6M
	92.51331	5.93074	6.41068836473368	YE	54.65683000000001	3.52429	6.448032203843508	0.7M			60.68787	4.27807	7.049299967192785	0.4M	49.04588	3.80347	7.7549225337581875	0.6M
											92.29365	8.08056	8.75527189573714	0.4M	69.14019	6.1291199999999995	8.864771705139947	0.6M
	87.39543	7.55951	8.649777225193583	YE	45.17662	5.10576	11.301775121733321	0.8M			98.43174	10.11395	10.275090128448404	0.4M	79.64021	7.26872	9.126947304634179	0.6M
	78.77835999999999	5.72079	7.261880039137653	YE	43.97506	2.56028	5.822118264307087	0.8M			70.72402	6.87697	9.72366955385172	0.4M	58.52041	5.7035	9.746172318341584	0.6M
	136.04105	10.269919999999999	7.549133147678585	YE	71.40868	5.72706	8.020117442305333	0.8M			100.23866	8.93833	8.917048571878356	0.4M	80.4715	6.23154	7.743785066762767	0.6M
	85.63242	6.5460199999999995	7.644324427594127	YE	47.38586	3.70159	7.811591896823229	0.8M			67.92544000000001	6.749789999999999	9.937057455939922	0.4M	54.766040000000004	5.60626	10.236745253080192	0.6M
	111.82309	8.88223	7.9431090662939114	YE	57.760830000000006	4.59581	7.956620429450199	0.8M			100.28848	8.94407	8.918342365942728	0.4M	77.96508	6.94061	8.902203396700164	0.6M
	92.14268	8.38562	9.100690364117908	YE	48.98907	3.88789	7.936239655090412	0.8M			103.45008	8.573210000000001	8.28729180296429	0.4M	77.39086	6.0861	7.864106950097208	0.6M
	185.91397	9.85718	5.302011462613594	YE	93.48855	7.707269999999999	8.244079087759944	0.8M			60.41972	5.46328	9.042213370071892	0.4M	47.37093	3.3674	7.108579037819185	0.6M
	174.27912	13.135320000000002	7.536944184707842	YE	89.11992	7.35988	8.25840059102387	0.8M			81.20976	8.15755	10.045036458671962	0.4M	60.769740000000006	6.09098	10.023047654967751	0.6M
	116.01998999999999	8.42965	7.265687576770176	YE	60.280280000000005	5.7147	9.480214756799404	0.8M			79.20083000000001	6.84782	8.646146763865984	0.4M	62.532869999999996	5.44637	8.709611441150871	0.6M
	104.98936	8.5069	8.102630590376014	YE	52.27023	4.9760599999999995	9.519873932064197	0.8M			65.03193	5.9844800000000005	9.202371819504664	0.4M	50.600590000000004	4.778980000000001	9.444514382144556	0.6M
	83.01229000000001	5.86857	7.069519465129802	YE	44.39764	3.6522699999999997	8.226270585553646	0.8M			88.18049	9.03076	10.241222293049177	0.4M	75.49864000000001	8.05793	10.672947221300939	0.6M
	75.87123000000001	5.8876599999999994	7.760069264726561	YE	39.50855	2.71373	6.868715758993939	0.8M			87.95439	7.870660000000001	8.948569821244853	0.4M	66.8993	5.23489	7.8250295593526396	0.6M
	108.8844	7.66975	7.043938341947974	YE	57.24401999999999	5.02007	8.769597243519934	0.8M			75.15065	5.42699	7.221481118260455	0.4M	58.30485	4.6971300000000005	8.056156563304768	0.6M
	83.4083	6.06962	7.276997612947392	YE	42.87505	3.29296	7.6803642211495955	0.8M			86.7635	6.885610000000001	7.936067586024079	0.4M	70.54305	5.2367300000000006	7.423452771038395	0.6M
	75.49812	6.50251	8.612810491175145	YE	38.31149	3.71255	9.6904349060817	0.8M			67.68949	5.420669999999999	8.008141293426792	0.4M	53.71918	4.34851	8.09489273663522	0.6M
	83.85707	6.43849	7.677933416943855	YE	40.43975	4.296209999999999	10.623730364307395	0.8M			78.38431	6.19289	7.900675530600449	0.4M	64.21565	4.68626	7.297691450604331	0.6M
	76.32372	5.73426	7.513077192778341	YE	41.30757	4.20614	10.18249197423136	0.8M			58.47473000000001	6.47374	11.071004517677977	0.4M	48.80458	3.7387	7.660551530204747	0.6M
	123.38953000000001	13.46754	10.914653779781801	YE	60.75083000000001	6.33076	10.420861739666766	0.8M			85.69596	7.74918	9.042643317141206	0.4M	67.67295	5.885269999999999	8.696635805000371	0.6M
	90.39681	6.902310000000001	7.635568113520821	YE	50.59251	3.66414	7.242455454374571	0.8M			101.86046	7.43888	7.303010412479975	0.4M	78.03023	5.93843	7.61042226839521	0.6M
	81.34302	6.7211300000000005	8.262700352162977	YE	43.851290000000006	3.1259900000000003	7.1286158286335475	0.8M			77.15162	5.7705	7.479428170140823	0.4M	61.542159999999996	4.93353	8.01650445808207	0.6M
	92.97034000000001	7.40653	7.966551482978335	YE	51.44996	5.18352	10.074876637416239	0.8M			102.94568000000001	8.37399	8.134377275471879	0.4M	80.62849	6.778810000000001	8.407462424262194	0.6M
	105.95498	8.24203	7.778803790062533	YE	76.38011999999999	5.49395	7.1929056932615465	0.8M			71.43148000000001	7.4413	10.417395803642874	0.4M	57.343430000000005	5.45175	9.50719201833584	0.6M
	113.30433000000001	8.71592	7.692486244788703	YE	58.7568	5.98441	10.18505092176565	0.8M			60.004509999999996	5.01547	8.358488386956248	0.4M	48.01849	4.45458	9.276801498756	0.6M
	121.21101999999999	8.414019999999999	6.941629564704595	YE	66.91592	4.5409	6.7859785832728585	0.8M			53.17256999999999	4.54707	8.5515332435502	0.4M	42.32135	3.61695	8.546395613561476	0.6M
	119.8342	9.17137	7.653382757176165	YE	81.59006	5.02771	6.162159949385992	0.8M			82.53265	7.49671	9.083326416878654	0.4M	65.80989	5.781569999999999	8.78526008780747	0.6M
	76.21729	5.826280000000001	7.6443022311604105	YE	41.2514	3.8137	9.24501956297241	0.8M
	76.77542	5.581519999999999	7.269930923204328	YE	41.87384	3.30991	7.9044816525066715	0.8M			134.26221	8.13134	6.056313239592883	0.4M	91.92057	6.21555	6.761870601977337	0.8M
	109.54941000000001	7.64813	6.981443350539268	YE	61.61399	4.3598	7.0759903716672135	0.8M			111.44538	8.352319999999999	7.49454127214605	0.4M	77.82826	6.76547	8.692819292118312	0.8M
	84.5006	6.30026	7.455876052951102	YE	47.27162	4.2761	9.045808034503578	0.8M			60.43391999999999	4.74367	7.849350166264244	0.4M	42.27065	3.24189	7.66936396767024	0.8M
	85.21431	7.22858	8.48282407027646	YE	63.7423	4.69211	7.361061649799269	0.8M			138.1866	10.86237	7.860653637907005	0.4M	89.78076999999999	8.43379	9.39375993322401	0.8M
	104.59396	8.0194	7.667173133133118	YE	74.30634	4.41324	5.939250944132088	0.8M			70.71649000000001	5.85273	8.276329891373283	0.4M	47.47867	3.64658	7.680459456846622	0.8M
	74.82959	6.64703	8.882889776624461	YE	41.323570000000004	3.7434300000000005	9.058825266064865	0.8M			79.23378000000001	5.571280000000001	7.031445426433018	0.4M	58.8213	4.22051	7.175138937765742	0.8M
											77.38788000000001	6.63242	8.570360113237369	0.4M	54.56655	5.50879	10.095543881737072	0.8M
	119.03658	9.198160000000001	7.727170925105545	YE	59.83226	5.37058	8.976060740476793	0.9M			71.34215999999999	5.33178	7.473533181501654	0.4M	50.7417	3.6639699999999995	7.220826263211519	0.8M
	102.01602	7.799239999999999	7.64511299303776	YE	50.0023	2.98549	5.970705347554013	0.9M			101.85331	7.5905	7.452384218048485	0.4M	68.37495	5.6862	8.316203521903857	0.8M
	122.502	9.21289	7.520603745244976	YE	62.116130000000005	4.13708	6.660234628268051	0.9M			58.565690000000004	4.54592	7.76208732450689	0.4M	40.68528	3.56558	8.76380843391025	0.8M
	74.09963	5.76845	7.784721732078823	YE	36.58271	2.56117	7.001039562131947	0.9M			111.39799	10.112860000000001	9.078135072275542	0.4M	76.25501	6.938439999999999	9.098995593863274	0.8M
	73.32864000000001	5.60478	7.643370993925429	YE	39.99361	2.74552	6.864896667242593	0.9M			72.98791	5.9025099999999995	8.08696947206736	0.4M	56.413940000000004	3.66846	6.502754461042784	0.8M
	86.87011	7.933210000000001	9.13226655290295	YE	44.04482	3.27363	7.432497169928268	0.9M			99.29356	7.601380000000001	7.655461240386588	0.4M	71.27865	5.09941	7.154189929242487	0.8M
	116.01973000000001	8.3165	7.168177343629398	YE	56.64593000000001	3.7567699999999995	6.632021047231458	0.9M			73.32132	6.34181	8.649339646367523	0.4M	48.04391	3.88475	8.085832314647163	0.8M
	89.49396	6.754639999999999	7.547593156007398	YE	44.28117	3.8148400000000002	8.615038852857772	0.9M			90.17888	7.75472	8.599264040538095	0.4M	67.06036999999999	5.02386	7.491548287013627	0.8M
	108.15243999999998	6.5457	6.052290637178413	YE	54.363490000000006	3.3120199999999995	6.092360884115422	0.9M			53.55056999999999	4.3958	8.208689468664854	0.4M	37.59445	2.7962599999999997	7.43795959243984	0.8M
	119.67756999999999	8.0606	6.735263759115432	YE	64.1622	4.66225	7.266349969296565	0.9M			58.66226999999999	4.94215	8.424750695804988	0.4M	40.32778	3.3630400000000003	8.339263901955428	0.8M
	100.34733	7.91047	7.88308966466771	YE	52.28667	3.82605	7.3174482138564185	0.9M			94.43969	6.23192	6.598835722565374	0.4M	64.30885	4.34141	6.750874879585002	0.8M
	92.21223	6.47874	7.0259010111782345	YE	50.536970000000004	3.7107300000000003	7.3426048296920055	0.9M			89.96348	7.10073	7.892902764544013	0.4M	60.45615	4.88061	8.072975205996412	0.8M
	132.0281	10.8614	8.226582068514203	YE	61.078669999999995	5.427	8.885262236391199	0.9M			119.96736000000001	5.05929	4.217222084406958	0.4M	81.57547	4.27004	5.234465703967136	0.8M
	150.86194	8.85114	5.867046386915082	YE	65.43918000000001	4.52701	6.917889252279749	0.9M			63.15445	5.109369999999999	8.090277090529645	0.4M	45.87127	3.2698400000000003	7.128296208062259	0.8M
	88.61176	5.89695	6.654816471312612	YE	47.50432	3.7434800000000004	7.880293834329173	0.9M			78.45125999999999	6.9682	8.882202784251012	0.4M	54.83648	4.32183	7.8813045622184354	0.8M
	105.43632	8.193769999999999	7.771297404917014	YE	50.77482	4.84317	9.538527167600003	0.9M			65.40774	5.667680000000001	8.665151861232326	0.4M	47.5203	3.85112	8.104157591597696	0.8M
	120.40163999999999	9.40357	7.810167702034625	YE	60.48066	4.80386	7.942803534220692	0.9M			71.15378	5.81299	8.169615163101666	0.4M	49.71368	3.0439599999999998	6.12298264783456	0.8M
	83.32223	5.61165	6.734877355058789	YE	40.85295	2.34016	5.728252182522927	0.9M			58.47655	5.41708	9.26367920132087	0.4M	43.02067	3.4971400000000004	8.128976141003848	0.8M
	97.04353	7.0585	7.273540028892189	YE	46.42395	3.4912199999999998	7.520299328256212	0.9M			73.60082	5.960719999999999	8.098714117587276	0.4M	52.238929999999996	5.65046	10.816569175517186	0.8M
	91.23566	6.15036	6.741179928988293	YE	44.98121	3.47325	7.72155751257025	0.9M			146.19138999999998	11.66047	7.9761674063021095	0.4M	100.27158	6.29821	6.281151648353402	0.8M
	113.20606000000001	7.606789999999999	6.719419437440009	YE	55.18796999999999	3.7440599999999997	6.7841959035637664	0.9M			77.15467	5.56409	7.211604948864406	0.4M	56.45891999999999	3.259	5.772338542784737	0.8M
	96.2285	5.73252	5.957195633310298	YE	64.16574	3.7170099999999997	5.792826514585509	0.9M			157.17816000000002	14.07947	8.957650350404915	0.4M	51.9683	7.5465100000000005	14.521371682352513	0.8M
	81.20445	5.130330000000001	6.317794160295404	YE	42.986990000000006	4.0412099999999995	9.40100714192829	0.9M			80.87073000000001	6.18206	7.644372692072891	0.4M	54.48315	3.9478699999999995	7.246038454090852	0.8M
	97.76399	6.20285	6.344718541049725	YE	51.02763	4.07446	7.984811365920777	0.9M			68.80667	6.51187	9.464009811839464	0.4M	49.363459999999996	4.12869	8.363858611207561	0.8M
	114.11842	7.4543800000000005	6.532144416300191	YE	74.44526	4.0672	5.463343132927469	0.9M			71.02463	6.17393	8.69266056014653	0.4M	49.45467	3.31457	6.702238635906375	0.8M
	103.31336999999999	6.73548	6.5194659703773095	YE	53.9517	4.91554	9.111001136201454	0.9M			75.03350999999999	6.9185300000000005	9.22058690843598	0.4M	53.220209999999994	5.18807	9.748308020580904	0.8M
	109.05228000000001	7.45362	6.834905239945464	YE	56.2555	4.83114	8.587853632089308	0.9M			83.74077	5.85781	6.99517093047986	0.4M	57.734930000000006	4.634469999999999	8.027150981217087	0.8M
	100.75281	5.8774	5.833484942008068	YE	65.82202	4.08244	6.202240526802429	0.9M			72.40504	5.96681	8.240876601960306	0.4M	52.4411	3.7006	7.056678826340409	0.8M
	80.72966	4.78939	5.932627487840281	YE	39.57691	2.6383900000000002	6.6664881113760535	0.9M			94.07791999999999	6.25549	6.649264779663497	0.4M	64.16826999999999	4.20277	6.549607773436934	0.8M
											61.82252	5.070880000000001	8.202318507883536	0.4M	41.7331	3.1856400000000002	7.633365362266403	0.8M
	121.58393999999998	10.08662	8.296013437301013	YE	57.32507	4.58745	8.002519665479694	1.0M			84.30461	6.08376	7.21640251938773	0.4M	56.53561	4.94586	8.748220811626513	0.8M
	111.36425	7.545030000000001	6.775091647454189	YE	51.771440000000005	4.14075	7.998135651625684	1.0M			70.37945	6.09091	8.65438704053527	0.4M	51.5244	4.7476	9.214275178362097	0.8M
	75.66368	5.87745	7.767861674187667	YE	35.78819	3.18177	8.89055858929999	1.0M			64.46995	5.04819	7.830299232433095	0.4M	46.28881	4.70414	10.162585730763007	0.8M
	70.26201999999999	5.64269	8.0309248154266	YE	32.2803	3.04663	9.438047353958916	1.0M			68.11975	5.36994	7.883088237992652	0.4M	45.163779999999996	4.0159400000000005	8.891948371017662	0.8M
	87.94458	5.80132	6.596563426648919	YE	42.47337	2.78776	6.563547936036156	1.0M			88.11263000000001	7.87743	8.940182582224592	0.4M	61.84836	6.15498	9.9517270951081	0.8M
	110.35025	7.890910000000001	7.150785793416871	YE	48.21454	3.30441	6.853554964954554	1.0M			67.76337	5.31711	7.846584371467948	0.4M	44.524190000000004	3.5087300000000003	7.880502710998223	0.8M
	99.19202	8.07943	8.145241925711364	YE	34.77281	3.7158599999999997	10.686107910174645	1.0M			112.7137	5.21525	4.626988555960811	0.4M	77.14156	3.214	4.166366352974972	0.8M
	80.71015	6.45484	7.99755668896663	YE	46.86173	3.2954	7.032177429215694	1.0M			94.22645	7.71276	8.185344985404841	0.4M	63.616009999999996	4.82078	7.577935177009687	0.8M
	67.39631999999999	5.85352	8.685221982446519	YE	30.81601	3.4136	11.077358814460407	1.0M			93.57745	8.4582	9.038716058195643	0.4M	68.16861999999999	4.61487	6.769786450129107	0.8M
	79.27422	6.787839999999999	8.562480967961589	YE	37.10058	3.3300400000000003	8.975708735550764	1.0M			75.15697	5.27226	7.014998076692022	0.4M	53.441959999999995	3.53822	6.620677834420744	0.8M
	80.08021	6.51885	8.140400730717365	YE	36.84434	3.46961	9.41694165236777	1.0M			63.28055	4.87512	7.703978552651644	0.4M	37.43023	3.6682900000000003	9.800340526894972	0.8M
	78.47155	6.30035	8.028833379740812	YE	38.15466	3.21448	8.424868679212448	1.0M			109.77816000000001	8.922369999999999	8.127636681103052	0.4M	72.82257	4.68891	6.438814230258559	0.8M
	89.6213	6.6717	7.4443240613559505	YE	42.41814	2.68771	6.336227849688836	1.0M			131.395	11.45278	8.716298184862438	0.4M	89.14572	6.14533	6.893578289569034	0.8M
	85.76533	2.23123	2.601552398853942	YE	39.2197	3.36924	8.590682743621189	1.0M			67.29553	5.36377	7.97046995543389	0.4M	43.07533	4.5747599999999995	10.620371335518495	0.8M
	77.14974000000001	5.10995	6.623418303159544	YE	34.671659999999996	2.2027900000000002	6.35328680541976	1.0M			75.4922	5.36733	7.109780878024486	0.4M	50.71182	3.29195	6.4914846282385446	0.8M
	97.38424	7.11238	7.303419937353313	YE	46.09424	3.8059199999999995	8.25682341220942	1.0M			85.29004	7.38028	8.65315574948728	0.4M	59.53485	4.5166699999999995	7.586598437721771	0.8M
	68.33878	5.5488800000000005	8.119664998409396	YE	30.926270000000002	2.68715	8.688891353532126	1.0M
	83.03921	6.72571	8.099438807281524	YE	37.056979999999996	3.69613	9.974180302874116	1.0M			98.75126	7.51735	7.612409198626935	0.4M	56.27636	4.544980000000001	8.076179767134906	1.0M
	76.03092	5.62812	7.4024094407906675	YE	36.36039	3.35585	9.229411455707709	1.0M			92.962	7.17099	7.713893849099632	0.4M	50.63542	4.16346	8.222426119897888	1.0M
	75.63072	5.86604	7.756160459665068	YE	32.363	2.59631	8.022463924852454	1.0M			82.92373	7.36291	8.879135079910178	0.4M	52.27683	3.93989	7.536589345604927	1.0M
											78.7084	6.93301	8.808475334271819	0.4M	49.37818	3.13023	6.339298046222036	1.0M
											94.10975	7.4734	7.941153812437074	0.4M	59.52143	4.88629	8.209295374791902	1.0M
											64.88821999999999	5.93764	9.150566928789234	0.4M	40.30985	3.17167	7.86822575623576	1.0M
											74.97725	5.39065	7.189714213311371	0.4M	41.06286	3.3382099999999997	8.129511680384658	1.0M
											86.54198000000001	7.1551800000000005	8.26787184670376	0.4M	53.542480000000005	3.64491	6.807510597193106	1.0M
											62.69863	3.6973199999999995	5.896970954548767	0.4M	37.23588	1.92002	5.156370683330165	1.0M
											108.92974	4.46201	4.096227531618087	0.4M	68.76966999999999	5.3504	7.7801740214835995	1.0M
											59.001430000000006	6.02265	10.20763395056696	0.4M	39.70899	3.71395	9.352919829993157	1.0M
											62.168969999999995	5.4463099999999995	8.760495790745768	0.4M	40.65015	2.8243400000000003	6.947920241376725	1.0M
											68.14883	5.75899	8.450607295825915	0.4M	41.5608	4.00356	9.633019576139054	1.0M
											64.84074	5.39187	8.31555901428639	0.4M	41.68972	2.8685400000000003	6.880689052361111	1.0M
											66.72244	5.907019999999999	8.853123476899224	0.4M	41.4847	3.08328	7.432330473644501	1.0M
											63.485569999999996	5.64456	8.891091314136427	0.4M	39.42153	4.34699	11.026943906033074	1.0M
											97.69060999999999	8.72432	8.930561494088328	0.4M	60.28875	5.11268	8.480321784744252	1.0M
											84.20307	6.47105	7.685052338352984	0.4M	46.69941	3.92436	8.403446638833339	1.0M
											72.7478	6.23485	8.570499726452208	0.4M	44.94668	3.4645099999999998	7.708044287142009	1.0M
											78.4925	6.55273	8.348224352645158	0.4M	47.70924	3.71615	7.789162015576018	1.0M
											77.77703000000001	5.32185	6.8424443566435995	0.4M	48.0233	3.09592	6.446703995768721	1.0M
											65.41741	6.02965	9.217194627546398	0.4M	39.1561	3.9447	10.074292383562202	1.0M
											107.33882	9.61052	8.953442938910637	0.4M	68.46661	5.62486	8.215479048838551	1.0M
											117.11334	9.57293	8.174073081683094	0.4M	71.82413000000001	5.0008300000000006	6.962604350376399	1.0M
											56.54623	5.37184	9.499908305116007	0.4M	37.40896	2.69329	7.199585339982721	1.0M
											81.5033	5.583480000000001	6.850618318522073	0.4M	46.859790000000004	3.7024	7.901017055347452	1.0M
											69.98546	5.21442	7.450719049356823	0.4M	41.3146	3.1221900000000002	7.557110561399603	1.0M
											66.05254000000001	1.7891400000000002	2.708661922766331	0.4M	37.57177	0.97456	2.5938623599580217	1.0M
											61.71946	4.4402	7.194165341044785	0.4M	40.67034	1.62006	3.983394286843926	1.0M
											73.43892	5.54896	7.555884536428368	0.4M	45.54272	2.9616700000000002	6.503059105824158	1.0M
											113.07812	9.77947	8.648419340540858	0.4M	69.18355	5.55645	8.031461236088637	1.0M
											76.22355999999999	5.31374	6.971256656078515	0.4M	48.72417	3.8830400000000003	7.9694328297434325	1.0M
											79.91878	6.8783199999999995	8.606637889116927	0.4M	51.78331	3.8544300000000002	7.443382819676843	1.0M
											75.9427	5.55978	7.321019663509462	0.4M	47.14407	3.9144	8.303059112206478	1.0M
											88.18701999999999	7.01289	7.952292752380112	0.4M	51.6641	5.4185099999999995	10.487959724450826	1.0M
											71.97498	5.8880300000000005	8.180662224567483	0.4M	39.40388	3.52089	8.935389103814142	1.0M
											85.64086	7.283989999999999	8.505274234751962	0.4M	57.70789	4.09324	7.093033552257759	1.0M
											80.08251	5.9840599999999995	7.472368186261893	0.4M	49.08664	4.76727	9.711950135515487	1.0M
											79.51089	6.80318	8.556287069607697	0.4M	49.45195	2.86827	5.800115061185656	1.0M
											115.05143000000001	9.200660000000001	7.996997516675804	0.4M	72.97304	6.97537	9.55883159040654	1.0M
											141.2557	13.5002	9.557278042585185	0.4M	87.34513000000001	6.52276	7.467800437185221	1.0M
											82.65911	7.30235	8.834295457572674	0.4M	52.100559999999994	4.8058	9.224085115399912	1.0M
											78.13155	6.017580000000001	7.701856676336257	0.4M	45.00947	3.7093199999999995	8.241199018784268	1.0M
											56.85625	6.02303	10.59343519841706	0.4M	34.24877	3.12177	9.114984275347698	1.0M
