# Supplementary material for: Control of nuclear size by osmotic forces in Schizosaccharomyces pombe
Source: eLife. 2022 Jul 20;11:e76075. doi: 10.7554/eLife.76075 (PMC9410708; doi:10.7554/eLife.76075)
Supplement: Figure 3—source data 1. — Related to Figure 3A. [file elife-76075-fig3-data1.xlsx]

## Sheet: Sheet1
Intact Cells	Protoplasts
7.58021	7.78501
7.56304	7.5607
7.90886	8.41768
8.33614	8.29417
7.28361	7.27497
8.11228	7.57412
7.40521	7.71229
7.57019	8.45699
8.82167	8.0415
7.98836	7.3627
7.80987	7.96541
7.57201	7.70013
7.99652	8.24176
7.80585	7.70707
8.59921	8.44148
7.6262	7.83788
7.58241	6.98402
8.13095	8.34125
7.89725	8.33918
8.54279	8.44967
7.66188	7.8941
7.52683	7.22861
7.64187	7.59045
7.48106	7.45452
8.73005	9.29801
8.25219	8.76928
8.43786	9.06689
7.79173	8.42409
9.36988	8.73009
8.11042	7.7981
7.82562	7.74805
7.15902	7.84345
