# Supplementary material for: Control of nuclear size by osmotic forces in Schizosaccharomyces pombe
Source: eLife. 2022 Jul 20;11:e76075. doi: 10.7554/eLife.76075 (PMC9410708; doi:10.7554/eLife.76075)
Supplement: Figure 4—figure supplement 1—source data 1. — Related to Figure 4—figure supplement 1. [file elife-76075-fig4-figsupp1-data1.xlsx]

## Sheet: Sheet1
Concentration	0 M
	dt	0.0100000000000000	0.0200000000000000	0.0300000000000000	0.0400000000000000	0.0500000000000000	0.0600000000000000	0.0700000000000000	0.0800000000000000	0.0900000000000000	0.100000000000000	0.110000000000000	0.120000000000000	0.130000000000000	0.140000000000000	0.150000000000000	0.160000000000000	0.170000000000000	0.180000000000000	0.190000000000000	0.200000000000000	0.210000000000000	0.220000000000000	0.230000000000000	0.240000000000000	0.250000000000000	0.260000000000000	0.270000000000000	0.280000000000000	0.290000000000000	0.300000000000000	0.310000000000000	0.320000000000000	0.330000000000000	0.340000000000000	0.350000000000000	0.360000000000000	0.370000000000000	0.380000000000000	0.390000000000000	0.400000000000000	0.410000000000000	0.420000000000000	0.430000000000000	0.440000000000000	0.450000000000000	0.460000000000000	0.470000000000000	0.480000000000000
	AVG-MSD	0.0145940232020395	0.0302232363639611	0.0447653249647536	0.0587450639536372	0.0724293352377542	0.0860551724187480	0.0989954702154167	0.111512361297072	0.124156126829201	0.136897234084384	0.149968451676338	0.162132153494701	0.174269904745544	0.186895859482080	0.199786463094682	0.212810209051159	0.218211207180156	0.226015487765238	0.231983431677497	0.240756771073393	0.246690830723232	0.254782970723911	0.261541615200270	0.276430573158097	0.284705847119016	0.293482399600125	0.307311782927870	0.316601020009761	0.305596588768915	0.306341052411265	0.305191419481345	0.315528537366239	0.314178759494890	0.324765302897006	0.317869640749794	0.326486287019761	0.308147367674654	0.302047796721591	0.282116198502560	0.286116520439307	0.291176290646623	0.293520960830152	0.306669495017268	0.323558552962582	0.320528467168437	0.322471343305587	0.322233418968768	0.343140308033971
	STD_MSD	0.00859006064444687	0.0173291793472615	0.0278501213916695	0.0401544109080251	0.0545433448900205	0.0702474119434700	0.0867553616905254	0.103845613289113	0.122648090618381	0.143182949320127	0.158247496874965	0.169326660339467	0.183785083077136	0.193255334468057	0.210490818247497	0.226816854042005	0.238124058469691	0.241213488279817	0.240442566354267	0.249525520236768	0.256461604739335	0.269806816689024	0.285031077886692	0.301375091550622	0.302776958122224	0.312060135068383	0.333619503992169	0.361553711117579	0.325103147895497	0.340202593026344	0.334147070058688	0.345306655978901	0.368223429161155	0.418560969255394	0.372983905409959	0.399922608420543	0.348373818939384	0.341011061563467	0.328465582373293	0.324528877483483	0.342120327044088	0.347431844896062	0.375535458408552	0.396485128429907	0.389406935198527	0.383825215817925	0.399677274500936	0.424569888491371
Concentration	0.1 M
	dt	0.0100000000000000	0.0200000000000000	0.0300000000000000	0.0400000000000000	0.0500000000000000	0.0600000000000000	0.0700000000000000	0.0800000000000000	0.0900000000000000	0.100000000000000	0.110000000000000	0.120000000000000	0.130000000000000	0.140000000000000	0.150000000000000	0.160000000000000	0.170000000000000	0.180000000000000	0.190000000000000	0.200000000000000	0.210000000000000	0.220000000000000	0.230000000000000	0.240000000000000	0.250000000000000	0.260000000000000	0.270000000000000	0.280000000000000	0.290000000000000	0.300000000000000	0.310000000000000	0.320000000000000	0.330000000000000	0.340000000000000	0.350000000000000	0.360000000000000	0.370000000000000	0.380000000000000	0.390000000000000	0.400000000000000	0.410000000000000	0.420000000000000	0.430000000000000	0.440000000000000	0.450000000000000	0.460000000000000	0.470000000000000	0.480000000000000
	AVG-MSD	0.0126194729305521	0.0256159998349748	0.0378307031133224	0.0495757859620184	0.0609635886138460	0.0720596765477448	0.0828685525199157	0.0929456641950394	0.102581458721987	0.110897483538437	0.120004002870441	0.133793373928956	0.133084629353512	0.135829668174820	0.148070326416672	0.155561978287542	0.163540114706623	0.157461877490944	0.172122883800408	0.177254060230781	0.184294642922601	0.178108702060458	0.164743047713773	0.176302653175603	0.181812660832050	0.188080848203053	0.194005552271723	0.193962490821118	0.194621953284131	0.184700943641385	0.193067052522895	0.202299960191343	0.212646154193951	0.213567073772814	0.224681078043234	0.241085051810484	0.243781114262598	0.238705286679044	0.257047810984237	0.268696795010499	0.278752689491332	0.248489324097315	0.254108154087408	0.260576381883963	0.244247590115182	0.248827416552567	0.245959951982540	0.250095042663707
	STD_MSD	0.00711598679361982	0.0138363940722959	0.0227563139755172	0.0330535798466845	0.0449606317079940	0.0586131398976641	0.0727488703224350	0.0848027642072538	0.0970787875641723	0.107433195741361	0.117769865715486	0.136928187246797	0.125918422063521	0.128916279331406	0.138281323747549	0.140553261013678	0.143561635700156	0.133696822907735	0.147784337172299	0.145076002403018	0.159717868571269	0.158223261151136	0.153144184528251	0.166242753729589	0.175053667674284	0.186951968593613	0.201539668794820	0.203374255851454	0.204023108416036	0.158277436260384	0.175293595421001	0.187831104564578	0.200321285651107	0.208382227781594	0.212135709382559	0.226494505742445	0.228901618965421	0.238860300235092	0.253370061742855	0.287870790464818	0.337162979944499	0.242297032306912	0.248967713952859	0.272374794008115	0.266520382991146	0.272334563490624	0.288043298832964	0.296272035110872
Concentration	0.2 M
	dt	0.0100000000000000	0.0200000000000000	0.0300000000000000	0.0400000000000000	0.0500000000000000	0.0600000000000000	0.0700000000000000	0.0800000000000000	0.0900000000000000	0.100000000000000	0.110000000000000	0.120000000000000	0.130000000000000	0.140000000000000	0.150000000000000	0.160000000000000	0.170000000000000	0.180000000000000	0.190000000000000	0.200000000000000	0.210000000000000	0.220000000000000	0.230000000000000	0.240000000000000	0.250000000000000	0.260000000000000	0.270000000000000	0.280000000000000	0.290000000000000	0.300000000000000	0.310000000000000	0.320000000000000	0.330000000000000	0.340000000000000	0.350000000000000	0.360000000000000	0.370000000000000	0.380000000000000	0.390000000000000	0.400000000000000	0.410000000000000	0.420000000000000	0.430000000000000	0.440000000000000	0.450000000000000	0.460000000000000	0.470000000000000	0.480000000000000
	AVG-MSD	0.0103394447179473	0.0208657711924168	0.0304229787354291	0.0392813829033501	0.0479098085207727	0.0565907719673036	0.0652823962892986	0.0732217921175581	0.0804392704805672	0.0872673072146966	0.0989716872488438	0.108021887568209	0.117261455610380	0.118857749403753	0.127195565409464	0.136467699436775	0.137558130023597	0.134093539649742	0.144984823683634	0.154954985963218	0.164201417194802	0.179186778360962	0.188478237526860	0.190994105669538	0.198544949753696	0.209530469011227	0.201727016612697	0.212389016684390	0.210197751949663	0.202559593254231	0.206298879834427	0.216151167992325	0.222761161419441	0.205178658241610	0.222445171651418	0.228731243404002	0.236030778944291	0.240624219759518	0.247217781936625	0.254623185378006	0.262150459467060	0.263466138589594	0.256040876165729	0.256194295725571	0.262473193078438	0.270894494843068	0.291045879416773	0.288394276607681
	STD_MSD	0.00698941047465173	0.0137417880306230	0.0210170516339174	0.0281650235704053	0.0360892644130332	0.0456629418607860	0.0563135393194831	0.0666614112056807	0.0764979537331944	0.0873853678633896	0.100209396466633	0.118548738915971	0.135849874467244	0.123021565658663	0.135793385245766	0.145149057583236	0.147183845180706	0.137606290763397	0.153233146673935	0.161671539259138	0.170525365860396	0.184786019807489	0.195928569823497	0.203543186029674	0.218100499470043	0.238057281746307	0.194051718512418	0.202148801366780	0.203264403003595	0.195047151576108	0.196342990880205	0.204411419022246	0.224292497955828	0.172449047465459	0.186748309390186	0.195580189771093	0.201355036485776	0.206173105537652	0.212802248127681	0.219787072864003	0.227427000940706	0.248255111931379	0.255766967993753	0.253088344059241	0.251372486671985	0.262153794365739	0.255488637314537	0.248944920089063
Concentration	0.4 M
	dt	0.0100000000000000	0.0200000000000000	0.0300000000000000	0.0400000000000000	0.0500000000000000	0.0600000000000000	0.0700000000000000	0.0800000000000000	0.0900000000000000	0.100000000000000	0.110000000000000	0.120000000000000	0.130000000000000	0.140000000000000	0.150000000000000	0.160000000000000	0.170000000000000	0.180000000000000	0.190000000000000	0.200000000000000	0.210000000000000	0.220000000000000	0.230000000000000	0.240000000000000	0.250000000000000	0.260000000000000	0.270000000000000	0.280000000000000	0.290000000000000	0.300000000000000	0.310000000000000	0.320000000000000	0.330000000000000	0.340000000000000	0.350000000000000	0.360000000000000	0.370000000000000	0.380000000000000	0.390000000000000	0.400000000000000	0.410000000000000	0.420000000000000	0.430000000000000	0.440000000000000	0.450000000000000	0.460000000000000	0.470000000000000	0.480000000000000
	AVG-MSD	0.00703504357273649	0.0135376028497306	0.0196164495504255	0.0253562529662994	0.0308811772598557	0.0362624039162515	0.0414008733418038	0.0466414196433046	0.0515937127119211	0.0564962627249229	0.0594561983397008	0.0648222036589403	0.0699988463518173	0.0760826326828260	0.0795951781585698	0.0815221627991220	0.0857279326329636	0.0903938460481402	0.0956534768136851	0.0939941623420601	0.0939108183772840	0.0991116680964168	0.101120655302089	0.105863217698747	0.106434127144934	0.114146564070088	0.117697930910718	0.124538633415497	0.112154818163252	0.113482165643644	0.102963058562649	0.106508440568673	0.112350027455971	0.113317116491434	0.103153954914502	0.106348488169544	0.110322690669811	0.113245904502928	0.106038416405914	0.107983004266740	0.112358988859136	0.107191985598531	0.114256608090824	0.115374144512573	0.112750622322714	0.112872887741734	0.122263225125237	0.106871142008792
	STD_MSD	0.00566430824549629	0.00945797111581892	0.0142424816745128	0.0191156742616873	0.0245089523648647	0.0305707578775148	0.0377248143676494	0.0446682676004896	0.0520008093747112	0.0592793793370823	0.0629702770714077	0.0720201965134323	0.0817199650987011	0.0895808052194147	0.0860680726418802	0.0894807001815785	0.0954516577802314	0.102914794378994	0.116893206316087	0.105910570446633	0.108185490642347	0.118754581195903	0.126833645915840	0.138313314372976	0.137122104034230	0.146909073286388	0.149063290128021	0.151315756196348	0.121463876439727	0.127351088992770	0.106046645417708	0.115842766776310	0.131914135712036	0.139398913984263	0.103940508704551	0.111023463235785	0.116320462950645	0.127466747814756	0.110937747984342	0.116919821344720	0.128800293202838	0.119657033293570	0.127158136935019	0.131410259264820	0.126557258310488	0.132884820331181	0.145005057269806	0.137349891731891
Concentration	0.6 M
	dt	0.0100000000000000	0.0200000000000000	0.0300000000000000	0.0400000000000000	0.0500000000000000	0.0600000000000000	0.0700000000000000	0.0800000000000000	0.0900000000000000	0.100000000000000	0.110000000000000	0.120000000000000	0.130000000000000	0.140000000000000	0.150000000000000	0.160000000000000	0.170000000000000	0.180000000000000	0.190000000000000	0.200000000000000	0.210000000000000	0.220000000000000	0.230000000000000	0.240000000000000	0.250000000000000	0.260000000000000	0.270000000000000	0.280000000000000	0.290000000000000	0.300000000000000	0.310000000000000	0.320000000000000	0.330000000000000	0.340000000000000	0.350000000000000	0.360000000000000	0.370000000000000	0.380000000000000	0.390000000000000	0.400000000000000	0.410000000000000	0.420000000000000	0.430000000000000	0.440000000000000	0.450000000000000	0.460000000000000	0.470000000000000	0.480000000000000
	AVG-MSD	0.00442860213156078	0.00782265479940804	0.0109087114185366	0.0137748199183009	0.0165755051312427	0.0190191917974573	0.0217095151974619	0.0245402002029177	0.0274300723571139	0.0299717433248256	0.0324552871230963	0.0334618861424189	0.0366157185219239	0.0397212161410529	0.0414997184610816	0.0432280013504441	0.0472422068136126	0.0490122465842819	0.0498438396952747	0.0505427144560275	0.0533626229645286	0.0550435407515334	0.0526807352894804	0.0537593354229847	0.0525235433642910	0.0537094704012784	0.0558067558258955	0.0567859363343984	0.0586498287899493	0.0610629741509234	0.0644315297234240	0.0699685019966045	0.0739756294242393	0.0758296498321959	0.0808102702377053	0.0819153988624781	0.0888849854510129	0.0954531420605574	0.0936685960287693	0.0915938128506127	0.0893175533429180	0.0924501761828326	0.0945401196202935	0.0862837974095569	0.0902130869570885	0.0911424903074427	0.0952421566640469	0.0987362968905275
	STD_MSD	0.00499489942618652	0.00782870314621104	0.0106050796818731	0.0118750536376735	0.0146247441827538	0.0168603960145337	0.0207212985881305	0.0253984985773609	0.0305061458212020	0.0350147105504725	0.0470365597971593	0.0365154370427728	0.0363470274544565	0.0407061938010832	0.0438285270253889	0.0453778878505138	0.0519339597326192	0.0560482676009253	0.0585848426412433	0.0596565741172354	0.0632969393907747	0.0577787578360279	0.0534991649388643	0.0536726388619560	0.0504939788696446	0.0535523507963047	0.0568327279748121	0.0594535117187768	0.0646923901957176	0.0701668018869374	0.0746300045463212	0.0831785958327262	0.0912227476874609	0.0970121290379073	0.108898034472020	0.112212548709675	0.124071024792703	0.133588857409339	0.128323995438121	0.127577340780358	0.128747252522060	0.133780478737769	0.137099393535822	0.105974265168522	0.110507820337327	0.110307146276014	0.115586833001536	0.117144182779952
Concentration	0.8 M
	dt	0.0100000000000000	0.0200000000000000	0.0300000000000000	0.0400000000000000	0.0500000000000000	0.0600000000000000	0.0700000000000000	0.0800000000000000	0.0900000000000000	0.100000000000000	0.110000000000000	0.120000000000000	0.130000000000000	0.140000000000000	0.150000000000000	0.160000000000000	0.170000000000000	0.180000000000000	0.190000000000000	0.200000000000000	0.210000000000000	0.220000000000000	0.230000000000000	0.240000000000000	0.250000000000000	0.260000000000000	0.270000000000000	0.280000000000000	0.290000000000000	0.300000000000000	0.310000000000000	0.320000000000000	0.330000000000000	0.340000000000000	0.350000000000000	0.360000000000000	0.370000000000000	0.380000000000000	0.390000000000000	0.400000000000000	0.410000000000000	0.420000000000000	0.430000000000000	0.440000000000000	0.450000000000000	0.460000000000000	0.470000000000000	0.480000000000000
	AVG-MSD	0.00377093471244842	0.00544064743858537	0.00691815452590622	0.00835907102640336	0.00979808635095725	0.0114161078356708	0.0130921379501664	0.0143260688375197	0.0157355630625001	0.0173940719376331	0.0186658034546229	0.0189802616536162	0.0200481185384844	0.0207999927206257	0.0206036182338913	0.0217007105459659	0.0217909223419996	0.0227880937639537	0.0243507917769222	0.0253607938964382	0.0270149168281479	0.0272263762668423	0.0281615589484111	0.0277809900054382	0.0288791751678774	0.0290826238280133	0.0306948451569719	0.0321417154734308	0.0318343603855497	0.0308710611403950	0.0313561027253134	0.0332186107896181	0.0333174900663341	0.0333349161422059	0.0345259825035886	0.0344318864200270	0.0332087024816247	0.0345133165520812	0.0353253770669837	0.0365522185691991	0.0377345821591517	0.0387627738358116	0.0399162125420596	0.0420723600417400	0.0417564372324622	0.0436183503025062	0.0451755592110921	0.0472078064268972
	STD_MSD	0.00398632678582504	0.00582871562606644	0.00701132967564738	0.00910061477231810	0.0118990761231997	0.0157195633032282	0.0184525416937624	0.0192165444119328	0.0213508088817303	0.0238097107036235	0.0251590821951138	0.0229051950472380	0.0254090818855364	0.0273870375331243	0.0247163363629382	0.0263842900986722	0.0265056079583446	0.0285227539962745	0.0305617680158784	0.0309918745420125	0.0342633716805583	0.0300886414414161	0.0307150994722585	0.0298200350379452	0.0299429682029730	0.0273743168918995	0.0290338621308959	0.0310473870587632	0.0299041913383712	0.0274915336574892	0.0284858378918567	0.0294559528255548	0.0299573548297351	0.0298239932476179	0.0327152670554724	0.0340348140459330	0.0330947308709666	0.0346367424483176	0.0367993383684006	0.0386982302978738	0.0403762673800851	0.0416474623284156	0.0427444891733607	0.0448207777901888	0.0471178001726232	0.0508243663669295	0.0544141580541373	0.0622898378471437
Concentration	1.0 M
	dt	0.0100000000000000	0.0200000000000000	0.0300000000000000	0.0400000000000000	0.0500000000000000	0.0600000000000000	0.0700000000000000	0.0800000000000000	0.0900000000000000	0.100000000000000	0.110000000000000	0.120000000000000	0.130000000000000	0.140000000000000	0.150000000000000	0.160000000000000	0.170000000000000	0.180000000000000	0.190000000000000	0.200000000000000	0.210000000000000	0.220000000000000	0.230000000000000	0.240000000000000	0.250000000000000	0.260000000000000	0.270000000000000	0.280000000000000	0.290000000000000	0.300000000000000	0.310000000000000	0.320000000000000	0.330000000000000	0.340000000000000	0.350000000000000	0.360000000000000	0.370000000000000	0.380000000000000	0.390000000000000	0.400000000000000	0.410000000000000	0.420000000000000	0.430000000000000	0.440000000000000	0.450000000000000	0.460000000000000	0.470000000000000	0.480000000000000
	AVG-MSD	0.00314509568651783	0.00439011968986500	0.00553896121415979	0.00657081386239226	0.00721964224330420	0.00797684770737176	0.00893916951667845	0.0101856421525263	0.0112086762998134	0.0123923118521851	0.0136795273031467	0.0125323261853376	0.0116028659651204	0.0118487002849846	0.0126668537370946	0.0142591828463607	0.0132567089336974	0.0137209830385945	0.0143450535348784	0.0153919946961314	0.0173577308396183	0.0175418772746794	0.0153829743586697	0.0156118240960599	0.0162994738712672	0.0174727053503971	0.0180525092369071	0.0183289516297452	0.0189864539696747	0.0191415551196252	0.0194718050347146	0.0191070339602596	0.0196990323766369	0.0204695096879398	0.0215087578789579	0.0213638424304917	0.0207785061151782	0.0211314497578012	0.0211336208064676	0.0218411306268689	0.0224836211003081	0.0230839299553575	0.0234941225247331	0.0241295748878979	0.0249217161397831	0.0259179218958045	0.0261030564257167	0.0264429028755613
	STD_MSD	0.00614648921784670	0.00958871086705340	0.0132659333489019	0.0162886016066384	0.0173136617122019	0.0192942055495779	0.0223799726531390	0.0264717058532904	0.0304501961729008	0.0369309056270996	0.0379745098703479	0.0324539901144232	0.0242769070276656	0.0188555356154317	0.0212976920783063	0.0285143197031969	0.0174654314131060	0.0183354720893071	0.0203617845852675	0.0240460098594486	0.0311626012473647	0.0338874961982637	0.0208653358280224	0.0204408953561341	0.0220473380899645	0.0247010453128807	0.0274190129544542	0.0306786180133154	0.0331276103484942	0.0326619137874996	0.0317920180116231	0.0287367394635015	0.0302153834118848	0.0316844221609256	0.0326166039449629	0.0331009496758261	0.0306336724634927	0.0315060570666682	0.0315555645788722	0.0323003015285883	0.0330088054601725	0.0331337393005970	0.0341561066997716	0.0352137035368126	0.0360148837440837	0.0365968838534387	0.0371548745695955	0.0380330878776447
% % %%%% Alpha values from log fits for Cells
Alpha_C=[0.9642,0.9433,0.9224,0.9267,0.9012,0.8425,0.8266,0.8218,0.6724,0.5947,0.5851];
Err_C=[0.0227,0.0261,0.0246,0.0168,0.0128,0.01,0.0115,0.0165,0.0529,0.0460,0.0533];
C_C=[0,0.1,0.2,0.3,0.4,0.5,0.6,0.7,0.8,0.9,1.0];
%%%% Alpha values from log fits for Nuclei
Alpha_N=[0.8912,0.8158,0.811,0.7962,0.6624,0.7023,0.6752,0.6479,0.5723,0.2157,0.3634];
Err_N=[0.0075,0.0245,0.0317,0.0149,0.0282,0.0307,0.0278,0.0429,0.0429,0.0454,0.0489];
C_N=[0,0.1,0.2,0.3,0.4,0.5,0.6,0.7,0.8,0.9,1];
[truncated: 782 more columns]
