# Supplementary material for: Control of nuclear size by osmotic forces in Schizosaccharomyces pombe
Source: eLife. 2022 Jul 20;11:e76075. doi: 10.7554/eLife.76075 (PMC9410708; doi:10.7554/eLife.76075)
Supplement: Figure 4—figure supplement 1—source data 2. — Related to Figure 4—figure supplement 1. [file elife-76075-fig4-figsupp1-data2.xlsx]

## Sheet: Sheet1
Concentration [M]	Cyto Deff	Nucl Deff	SEM Cyto	SEM Nucl	N Cyto	N Nucl
0	0.404900000000000	0.524700000000000	0.00620000000000000	0.0119000000000000	3415	1595
0.100000000000000	0.335200000000000	0.443700000000000	0.0120000000000000	0.0219000000000000	583	263
0.200000000000000	0.263800000000000	0.372500000000000	0.00960000000000000	0.0231000000000000	576	251
0.300000000000000	0.200800000000000	0.267200000000000	0.00780000000000000	0.0126000000000000	587	349
0.400000000000000	0.169300000000000	0.206200000000000	0.00620000000000000	0.0113000000000000	628	158
0.500000000000000	0.136600000000000	0.170500000000000	0.00570000000000000	0.0150000000000000	554	209
0.600000000000000	0.0898000000000000	0.129300000000000	0.00350000000000000	0.00750000000000000	687	204
0.700000000000000	0.0603000000000000	0.103900000000000	0.00220000000000000	0.00780000000000000	652	219
0.800000000000000	0.0528000000000000	0.0726000000000000	0.00310000000000000	0.00760000000000000	494	259
0.900000000000000	0.0367000000000000	0.0537000000000000	0.00170000000000000	0.00600000000000000	601	71
1	0.0377000000000000	0.0614000000000000	0.00400000000000000	0.00930000000000000	588	154
