# Supplementary material for: Control of nuclear size by osmotic forces in Schizosaccharomyces pombe
Source: eLife. 2022 Jul 20;11:e76075. doi: 10.7554/eLife.76075 (PMC9410708; doi:10.7554/eLife.76075)
Supplement: Figure 4—figure supplement 1—source data 3. — Related to Figure 4—figure supplement 1. [file elife-76075-fig4-figsupp1-data3.xlsx]

## Sheet: Sheet1
Concentration	0.1 M
	dt	0.0100000000000000	0.0200000000000000	0.0300000000000000	0.0400000000000000	0.0500000000000000	0.0600000000000000	0.0700000000000000	0.0800000000000000	0.0900000000000000	0.100000000000000	0.110000000000000	0.120000000000000	0.130000000000000	0.140000000000000	0.150000000000000	0.160000000000000	0.170000000000000	0.180000000000000	0.190000000000000	0.200000000000000	0.210000000000000	0.220000000000000	0.230000000000000	0.240000000000000	0.250000000000000	0.260000000000000	0.270000000000000	0.280000000000000	0.290000000000000	0.300000000000000	0.310000000000000	0.320000000000000	0.330000000000000	0.340000000000000	0.350000000000000	0.360000000000000	0.370000000000000	0.380000000000000	0.390000000000000	0.400000000000000	0.410000000000000	0.420000000000000	0.430000000000000	0.440000000000000	0.450000000000000	0.460000000000000	0.470000000000000	0.480000000000000
	AVG-MSD	0.0367466189432693	0.0746109408018358	0.106588175471585	0.135976948207065	0.166556554748141	0.194956984563506	0.220405216995336	0.247206467943713	0.278672959985022	0.313114054564510	0.355278265007803	0.384764433576826	0.376666340660953	0.374265594385635	0.408306081406837	0.418791389040032	0.477405491020538	0.429016269984671	0.444863817885357	0.491870757875757	0.534225124394980	0.585882600639441	0.609223509594434	0.679737322005427	0.740326529958811	0.784759732551910	0.874882733400768	0.854732853142086	0.840073990807865	0.902443080242396	0.964479658521644	0.854168165917378	0.820713855224891	0.847203370741571	0.846520025938231	0.959078432972245	0.972380140030434	1.06232677469399	1.11660545651371	1.21322196308213	1.27350012639497	1.04408296984635	1.08573419279757	1.13515714305915	1.19662990994527	1.27641038200484	1.35274946135778	1.41259284033212
	STD_MSD	0.0185923961987970	0.0405070808602762	0.0611492276516153	0.0814447758547969	0.107651983902690	0.138696767119452	0.173685143080825	0.213265551127585	0.263415956163197	0.315422941572132	0.373885599459249	0.402525527507128	0.427830315916736	0.440468127210105	0.474266005370246	0.496472899921304	0.559360245524185	0.453505876697426	0.463835446925086	0.517791281913797	0.552649600868385	0.601956239546963	0.646349359335768	0.730608189621479	0.833422431425964	0.904504686060420	0.992853617924310	1.02391529893795	1.00268504361108	1.05691909714528	1.07266986476024	0.835230558048087	0.856465063599389	0.896072887980600	0.974605009407598	1.03820610544469	1.03683082256414	1.06218405375144	1.09027821927367	1.18060504893055	1.26394441571297	1.14875482011957	1.20807691041704	1.27408878651347	1.34520150533239	1.44448138917738	1.54217883502531	1.61064983573274
Concentration	0.2 M
	dt	0.0100000000000000	0.0200000000000000	0.0300000000000000	0.0400000000000000	0.0500000000000000	0.0600000000000000	0.0700000000000000	0.0800000000000000	0.0900000000000000	0.100000000000000	0.110000000000000	0.120000000000000	0.130000000000000	0.140000000000000	0.150000000000000	0.160000000000000	0.170000000000000	0.180000000000000	0.190000000000000	0.200000000000000	0.210000000000000	0.220000000000000	0.230000000000000	0.240000000000000	0.250000000000000	0.260000000000000	0.270000000000000	0.280000000000000	0.290000000000000	0.300000000000000	0.310000000000000	0.320000000000000	0.330000000000000	0.340000000000000	0.350000000000000	0.360000000000000	0.370000000000000	0.380000000000000	0.390000000000000	0.400000000000000	0.410000000000000	0.420000000000000	0.430000000000000	0.440000000000000	0.450000000000000	0.460000000000000	0.470000000000000	0.480000000000000
	AVG-MSD	0.0267715162565103	0.0556419544981377	0.0818246594356176	0.107093555982214	0.131988664131684	0.156065089179203	0.180634230188768	0.204917186910150	0.228702870586736	0.253408359840787	0.274518842859929	0.297281501131780	0.316124018159035	0.291001269524742	0.305171061965069	0.333508648342041	0.358900158307059	0.369192925327554	0.395925794129072	0.424648287525159	0.443183392344873	0.435954898074358	0.410382853669308	0.264381899864462	0.268823904232809	0.277579305598314	0.256068561313990	0.233452183702577	0.240678483867514	0.249970810718569	0.267874142281266	0.255909826395418	0.163738266389702	0.175009392145259	0.202225515796357	0.198214316325368	0.228510288652459	0.226358151968661	0.105981222860081	0.101797248655237	0.0859802550977398	0.0926334455387378	0.102462681374014	0.117026461463941	0.120284289699024	0.125975333796993	0.136940597123542	0.00868772535456669
	STD_MSD	0.0158822818152964	0.0335388467229050	0.0522983335435390	0.0732254567889385	0.0979609288627162	0.127137625263703	0.159345325968291	0.194437472579211	0.233158446183947	0.277573836169038	0.322076014830818	0.359649722451594	0.403025439846592	0.351505514837539	0.396155286823764	0.439562589845984	0.502409864026612	0.522275193510270	0.552651629276450	0.612170540076346	0.672654929629524	0.723659019867983	0.777997974045596	0.346986071481015	0.388553610294811	0.441844483953997	0.432727289742239	0.434068627077790	0.444494045599072	0.445616955604325	0.495545040647248	0.521617315425825	0.202883886675356	0.247235809693872	0.301561996251503	0.362943951093159	0.448724916192668	0.482525915093652	0.217988689493421	0.213642934834689	0.236285731710621	0.251742030017751	0.278974907714477	0.320374044743719	0.328663208095673	0.348672157900094	0.385283724815215	0.0196928757526656
Concentration	0.4 M
	dt	0.0100000000000000	0.0200000000000000	0.0300000000000000	0.0400000000000000	0.0500000000000000	0.0600000000000000	0.0700000000000000	0.0800000000000000	0.0900000000000000	0.100000000000000	0.110000000000000	0.120000000000000	0.130000000000000	0.140000000000000	0.150000000000000	0.160000000000000	0.170000000000000	0.180000000000000	0.190000000000000	0.200000000000000	0.210000000000000	0.220000000000000	0.230000000000000	0.240000000000000	0.250000000000000	0.260000000000000	0.270000000000000	0.280000000000000	0.290000000000000	0.300000000000000	0.310000000000000	0.320000000000000	0.330000000000000	0.340000000000000	0.350000000000000	0.360000000000000	0.370000000000000	0.380000000000000	0.390000000000000	0.400000000000000	0.410000000000000	0.420000000000000	0.430000000000000	0.440000000000000	0.450000000000000	0.460000000000000	0.470000000000000	0.480000000000000
	AVG-MSD	0.0125937162836877	0.0262784626867748	0.0386927818261107	0.0506128731035199	0.0621307838942080	0.0728473703925672	0.0836079664378509	0.0940905590297290	0.105214831286969	0.116671392083760	0.124951016534204	0.131336893952527	0.135512897192649	0.148397189200951	0.155153964208163	0.153092984540925	0.158583836906346	0.165072441447532	0.177580421532188	0.187247191541833	0.180961288877898	0.184299364853656	0.186226169994623	0.203731836306562	0.195156716854241	0.194806476143255	0.191545006334138	0.178975213764964	0.177800445101825	0.188325555016504	0.197801195422821	0.203838553960485	0.194197119213331	0.201157537514034	0.216376338442255	0.223199630286083	0.240535980156626	0.243064321412667	0.252007560990297	0.257606489570391	0.238110705195036	0.258149963359985	0.292171940433072	0.214345582495827	0.236682609380015	0.251405410075273	0.268998818203712	0.274444043286780
	STD_MSD	0.00842232407008887	0.0172441715181635	0.0271722654290322	0.0379821045884163	0.0507175357172840	0.0643632365661604	0.0784971242301253	0.0931146235462729	0.110434877198139	0.128482613700760	0.144518028211399	0.151097447418094	0.155934588242274	0.173641132243032	0.182444668396220	0.185670875912692	0.190482715657548	0.208536066954832	0.234832533988001	0.246021503967287	0.239985629697294	0.249744747941677	0.258401295737183	0.273055655843474	0.263768744771564	0.267806479428034	0.253361653603099	0.218380976384249	0.220594442509567	0.236210485176923	0.249063098343843	0.263514150145065	0.271056709976966	0.281404871715678	0.302200223343068	0.328256368458549	0.358995702995554	0.384019686319989	0.411449245057793	0.422216316067954	0.421420956642956	0.471555707759277	0.535940906415206	0.330394979249771	0.373668426346654	0.398661538278556	0.412339678983065	0.432779327876335
Concentration	0.6 M
	dt	0.0100000000000000	0.0200000000000000	0.0300000000000000	0.0400000000000000	0.0500000000000000	0.0600000000000000	0.0700000000000000	0.0800000000000000	0.0900000000000000	0.100000000000000	0.110000000000000	0.120000000000000	0.130000000000000	0.140000000000000	0.150000000000000	0.160000000000000	0.170000000000000	0.180000000000000	0.190000000000000	0.200000000000000	0.210000000000000	0.220000000000000	0.230000000000000	0.240000000000000	0.250000000000000	0.260000000000000	0.270000000000000	0.280000000000000	0.290000000000000	0.300000000000000	0.310000000000000	0.320000000000000	0.330000000000000	0.340000000000000	0.350000000000000	0.360000000000000	0.370000000000000	0.380000000000000	0.390000000000000	0.400000000000000	0.410000000000000	0.420000000000000	0.430000000000000	0.440000000000000	0.450000000000000	0.460000000000000	0.470000000000000	0.480000000000000
	AVG-MSD	0.00895823696357499	0.0183638711401115	0.0266044513025514	0.0340977884158758	0.0419609712920959	0.0501515721945480	0.0578560059820061	0.0655844628816689	0.0741346332678070	0.0827415218400229	0.0847378092218324	0.0952846092347363	0.107325255524259	0.109822791332101	0.117004858852500	0.113683004293723	0.112894274645173	0.109033167381123	0.105047829779557	0.106405596590517	0.110384677263162	0.113205383946655	0.111727310309017	0.112734853568251	0.115230963698758	0.121704639726560	0.127541011415064	0.145286160444321	0.151231979221813	0.157107712253900	0.121239141207602	0.124826664305290	0.120665427526601	0.124317141934040	0.131582606998352	0.146391625959561	0.142714358901486	0.138135346331016	0.144801770505075	0.143255551133568	0.162310807140966	0.169654229496979	0.176851339863970	0.183855665454374	0.169703844526679	0.173443255656891	0.174957830966398	0.180536876109341
	STD_MSD	0.00919942267238279	0.0183591168598221	0.0255100140771895	0.0318088517562552	0.0401887873704138	0.0489142764113037	0.0571448362718907	0.0660502922746382	0.0783149654242369	0.0984536594908932	0.0944910746637215	0.112379747261322	0.132423021159759	0.139185688237408	0.147535837096945	0.113898897958416	0.111008863611662	0.107059767109840	0.0908953020066834	0.0961370378570618	0.100289431400785	0.101889380731398	0.102695344536621	0.105828181055734	0.115407872448990	0.129734380249042	0.139709988909125	0.158013567056630	0.172553654023835	0.179848469207712	0.0982946167763119	0.100431624941565	0.103167869452007	0.107398322796033	0.114746958464785	0.122803816893412	0.122547558621233	0.128626371533993	0.131748965719367	0.135365609710046	0.136005733978340	0.136996509138243	0.139425945569820	0.149612623588938	0.147747348566659	0.156091984547224	0.162737992551590	0.174051058393769
Concentration	0.8 M
	dt	0.0100000000000000	0.0200000000000000	0.0300000000000000	0.0400000000000000	0.0500000000000000	0.0600000000000000	0.0700000000000000	0.0800000000000000	0.0900000000000000	0.100000000000000	0.110000000000000	0.120000000000000	0.130000000000000	0.140000000000000	0.150000000000000	0.160000000000000	0.170000000000000	0.180000000000000	0.190000000000000	0.200000000000000	0.210000000000000	0.220000000000000	0.230000000000000	0.240000000000000	0.250000000000000	0.260000000000000	0.270000000000000	0.280000000000000	0.290000000000000	0.300000000000000	0.310000000000000	0.320000000000000	0.330000000000000	0.340000000000000	0.350000000000000	0.360000000000000	0.370000000000000	0.380000000000000	0.390000000000000	0.400000000000000	0.410000000000000	0.420000000000000	0.430000000000000	0.440000000000000	0.450000000000000	0.460000000000000	0.470000000000000	0.480000000000000
	AVG-MSD	0.00597855064290144	0.0110837608451331	0.0153270610452997	0.0192053310415456	0.0232349488401733	0.0271931097480368	0.0312688878633750	0.0355040228597899	0.0399775334053333	0.0448302775124377	0.0451928211770853	0.0483446011138714	0.0526606269927755	0.0559998595666326	0.0602316561949064	0.0619249158598194	0.0652633218289160	0.0661361750695799	0.0714517058119668	0.0717779072085383	0.0783249801714378	0.0830206889799333	0.0852800342928057	0.0914012717395471	0.0970734676777654	0.102140605346177	0.104997496844393	0.108844675720292	0.115169956966116	0.112250646115660	0.119025524330147	0.128207123529192	0.119689384087501	0.113343286293230	0.116280080114880	0.118666084253794	0.123028386608982	0.121878048720737	0.102831593918163	0.103726523171552	0.105469186322463	0.109645997446820	0.117294813462480	0.122528814698381	0.129182289279661	0.125185662220158	0.132635466615710	0.134947542345941
	STD_MSD	0.00544636968442936	0.00931998938812838	0.0124504354491079	0.0160313761914393	0.0205007349779780	0.0254303349304824	0.0308235464750688	0.0366698395148093	0.0444318206269471	0.0563010203089839	0.0509308552786744	0.0538028685809414	0.0606603608169626	0.0658802641550239	0.0681192926466695	0.0700971016089265	0.0741353280459106	0.0763341592521357	0.0843162908807069	0.0859310496997188	0.0962972330395491	0.106018633974156	0.113203431661193	0.125809793458969	0.139085133700323	0.151420141468634	0.161635922419338	0.167557432948634	0.180357691961685	0.182600863002886	0.192203331237296	0.204481015265815	0.195007620015469	0.181784811225744	0.185868332534871	0.186797517684559	0.183069831561780	0.191989580161535	0.104331786505547	0.107936070172584	0.111573913858445	0.116309815365530	0.122282944851077	0.128175983664909	0.134172028810197	0.133371935934052	0.140516102308348	0.145194474550687
Concentration	1.0 M
	dt	0.0100000000000000	0.0200000000000000	0.0300000000000000	0.0400000000000000	0.0500000000000000	0.0600000000000000	0.0700000000000000	0.0800000000000000	0.0900000000000000	0.100000000000000	0.110000000000000	0.120000000000000	0.130000000000000	0.140000000000000	0.150000000000000	0.160000000000000	0.170000000000000	0.180000000000000	0.190000000000000	0.200000000000000	0.210000000000000	0.220000000000000	0.230000000000000	0.240000000000000	0.250000000000000	0.260000000000000	0.270000000000000	0.280000000000000	0.290000000000000	0.300000000000000	0.310000000000000	0.320000000000000	0.330000000000000	0.340000000000000	0.350000000000000	0.360000000000000	0.370000000000000	0.380000000000000	0.390000000000000	0.400000000000000	0.410000000000000	0.420000000000000	0.430000000000000	0.440000000000000	0.450000000000000	0.460000000000000	0.470000000000000	0.480000000000000
	AVG-MSD	0.00557334165701382	0.00842982524140911	0.0107824008898567	0.0130216399937224	0.0152687692360898	0.0174210515107643	0.0193139834234058	0.0213364667916574	0.0238583484602599	0.0264822311337860	0.0275838562403857	0.0303744628044170	0.0317119342088750	0.0337645319000153	0.0359776786971896	0.0404753631285289	0.0411374588890561	0.0436776657463354	0.0440541493623244	0.0453412442551543	0.0483481778857680	0.0491194206813113	0.0506848131940645	0.0524704454346805	0.0543507696749872	0.0573604027491700	0.0559553609414266	0.0533906112398989	0.0545846289858268	0.0568828323857065	0.0598264282741071	0.0608824262844732	0.0605170181647689	0.0635243588690614	0.0631027125826351	0.0658742368546185	0.0669962652698479	0.0694695003243859	0.0680799552086754	0.0704673456929447	0.0748022706158321	0.0644209067542118	0.0663839676856779	0.0682950924138481	0.0695058170468831	0.0674083019076455	0.0697435543365954	0.0717124849822649
	STD_MSD	0.00556142714061258	0.00744489903950295	0.00893795589245372	0.0112402448611080	0.0142202684809524	0.0174837031054081	0.0203136263472470	0.0238069489376766	0.0274931023556977	0.0324324812714079	0.0334071083284801	0.0360152960874886	0.0369245537481650	0.0379069802728975	0.0389374967134710	0.0492994299948199	0.0420681584053563	0.0451565617620735	0.0467848499634638	0.0502423459558041	0.0551825744447059	0.0576117706189106	0.0606319828677537	0.0632198590776847	0.0674125672860078	0.0713064830797154	0.0740456104433161	0.0675835287220475	0.0715938328099696	0.0759982439928919	0.0829293561823592	0.0867366634923082	0.0876944078932984	0.0954001539495381	0.0958177989243064	0.0950346476809792	0.0940237714319075	0.0986423628706172	0.101261462637241	0.107073982025140	0.119398970772807	0.0647615030120232	0.0654100389486461	0.0669771818160889	0.0699038756963305	0.0670393522277092	0.0705649842469753	0.0730665133040760
%%%% Alpha values from log fits
Alpha=[0.9083,0.965,0.9321,0.9524,0.8971,0.95,0.9278,0.8599,0.7834,0.6707];
Err=[0.0262,0.0201,0.0240,0.0274,0.0279,0.0190,0.0303,0.0235,0.0135,0.0368];
C=[0.1,0.2,0.3,0.4,0.5,0.6,0.7,0.8,0.9,1.0];
[truncated: 298 more columns]
