# Supplementary material for: Control of nuclear size by osmotic forces in Schizosaccharomyces pombe
Source: eLife. 2022 Jul 20;11:e76075. doi: 10.7554/eLife.76075 (PMC9410708; doi:10.7554/eLife.76075)
Supplement: Figure 4—source data 1. — Related to Figure 4B. [file elife-76075-fig4-data1.xlsx]

## Sheet: Sheet1
CytGEMs Deff	NucGEMs Deff
0.570494	0.710959
0.120717	0.745273
0.2852	0.384439
0.299988	0.313752
0.275795	0.753807
0.213938	0.54003
0.197499	0.204726
0.635753	1.41361
0.64811	0.577722
0.554398	0.523438
0.576167	0.384249
0.250825	0.548029
0.435769	1.86024
0.36576	0.521547
0.464319	0.59897
0.201639	0.955462
0.118009	0.272683
0.478188	0.603458
0.117785	0.80872
0.127955	0.57952
0.265405	0.346451
0.269286	0.482646
0.441701	0.346366
0.234423	0.657198
0.262734	0.664585
0.606538	0.723913
0.252821	0.537565
0.0986222	0.553678
0.162466	0.640466
0.158247	1.14218
0.120975	0.299854
0.0660498	0.470311
0.0265292	0.668933
0.0458851	1.23029
0.368932	0.478608
1.0476	0.216766
0.109169	0.631532
0.325251	0.294662
0.144025	0.654672
0.391607	0.229679
0.242351	0.623438
1.59877	0.717076
0.322266	0.397489
0.884587	0.534159
0.608134	0.480214
0.228202	1.74852
0.138156	0.356317
0.453483	0.461754
0.113722	0.801826
0.809655	0.42052
0.17401	0.84276
0.0335297	0.667905
0.344236	0.344817
0.918088	0.540517
0.295357	1.1209
0.204598	0.410396
0.632711	1.46033
0.200903	0.637884
0.763301	0.983661
0.285891	0.240067
0.312212	0.499263
0.668047	0.420005
0.640829	0.604807
0.340126	0.492369
0.300476	0.161787
0.0735816	0.494333
0.495096	0.379169
0.216347	0.510654
0.086425	0.472955
0.0225801	0.579056
0.239731	0.382442
0.172442	0.230489
0.0600765	0.498222
0.424849	0.99929
0.513047	0.648464
0.277581	1.12214
0.311698	1.19537
0.183321	0.843488
0.132617	0.966225
0.252983	0.350434
0.174393	0.733372
0.0819902	0.343394
0.244613	0.611482
0.228613	0.129575
0.149494	0.827607
0.397236	0.850464
0.0811324	0.350776
0.358614	0.841154
0.111264	0.354831
0.138133	0.275065
0.238224	0.625911
0.625289	0.381244
0.163126	0.167051
0.121873	0.249315
1.27314	0.130427
0.255419	0.0892797
0.0828486	1.08634
0.657108	0.29892
0.16644	0.593977
0.46746	0.275346
0.683266	0.372788
0.197865	0.850372
0.189193	1.27713
0.494409	0.708363
0.63129	0.398696
0.427909	1.2258
0.164018	0.583137
0.408424	0.306481
0.0804176	0.710782
0.0739876	0.120528
0.210786	0.433074
0.399284	0.804865
0.169787	0.549898
0.569292	0.247495
0.191978	0.0244379
0.552427	0.235768
0.0851959	0.438206
0.188156	0.194923
0.135613	0.311168
0.078932	0.157211
0.133587	0.793234
0.167119	0.499523
0.147038	0.252187
0.514955	0.683218
0.246478	0.262304
0.10806	0.197277
0.356219	0.617057
0.670386	0.257688
0.295762	0.700499
0.183424	0.337547
0.451286	0.455486
0.229546	0.177809
0.0685063	0.263492
0.0519207	0.133755
0.303882	0.365563
0.0629304	0.107384
1.25015	0.197875
0.235364	0.255494
0.115677	0.30288
0.55424	0.430932
0.419558	0.372417
0.374028	0.153778
0.173853	0.365317
0.390538	0.494326
0.0607097	0.90267
0.127355	0.279351
1.29793	0.55417
0.715245	0.498901
0.110307	0.548141
0.431341	0.153005
0.654679	0.36474
0.276431	0.227205
0.197298	0.392771
0.540374	0.698452
0.781872	0.129662
0.15907	0.31459
0.0982618	0.463088
0.485932	0.495151
0.440021	0.663985
0.201909	0.312668
0.137649	0.190506
0.721007	0.179695
0.635973	0.276699
0.142886	2.49955
0.306131	0.365781
0.308418	0.4718
0.860191	0.766614
0.336217	0.368825
0.0642902	0.31557
0.12935	1.05905
0.162226	0.948761
0.149785	1.5523
0.15952	0.474578
0.595408	0.474214
0.45904	0.693006
0.123619	0.214272
0.443259	0.290987
0.0343239	0.546608
0.124169	0.877628
0.565859	0.316018
0.261822	0.408391
0.390222	0.221204
0.0782706	0.149466
1.4944	0.444724
0.0334818	0.428586
0.135959	0.438316
0.0433561	0.0872649
0.0430668	0.206278
0.0290756	0.549903
0.030921	0.148853
0.180469	0.290949
0.246989	0.383281
1.09176	1.81418
0.358524	0.175118
0.21046	0.350875
0.649445	0.109634
0.323521	0.155368
0.256518	0.476305
0.257491	1.43681
0.174807	0.630626
0.0976627	0.510715
0.178913	0.494928
0.0957966	2.43617
0.155282	0.933095
0.0701896	0.231236
0.322248	0.83183
0.610548	1.22333
0.196103	0.64131
0.567616	0.697502
0.739725	0.364103
0.223875	0.770087
0.193442	0.399714
0.180766	0.453648
0.280179	1.80984
0.110953	0.326537
0.356198	0.419506
1.69281	0.41189
1.73625	0.414418
0.15587	1.44074
0.298995	0.0812906
0.354946	0.182
0.178824	1.15229
0.400285	0.166118
0.141984	0.274604
0.163337	0.50267
0.0684014	0.102353
0.297668	0.635282
0.226031	0.124782
0.178416	0.971078
0.528301	0.691138
0.622806	0.332172
0.168855	0.782786
0.376821	0.58723
0.263993	0.199608
0.216978	0.395311
0.463601	0.418513
0.246748	0.560685
0.272544	0.263121
0.160418	0.219669
0.134823	1.32578
0.0806575	0.616346
0.420882	5.64274
0.226671	0.663828
0.408812	0.553484
0.105015	0.435955
0.143773	0.339964
0.346672	1.70525
0.577939	0.643909
0.103709	0.432018
0.332947	2.47707
2.64363	0.876458
0.0446568	0.441601
0.505311	0.697052
0.118841	0.463942
0.0246121	0.570697
0.0708497	0.681642
0.578535	0.102837
0.91467	0.204238
0.666017	0.157977
0.326382	0.228531
0.731528	1.06173
0.330685	0.62046
0.370122	0.781167
0.119303	0.678652
0.11497	0.504495
0.12159	0.317092
0.117508	1.04331
0.161961	0.421629
0.197028	0.536841
0.504772	0.619409
0.119298	0.477791
0.0730576	0.414643
0.331234	0.578974
0.481647	0.166591
0.138375	0.589857
0.013614	0.332703
1.23225	1.38085
0.159585	0.472253
0.230594	0.194036
0.313289	0.659659
0.241151	0.81238
0.0855927	0.285568
0.190552	1.06577
0.07805	0.415827
0.298679	0.510479
0.265855	1.12541
0.42247	0.773803
0.394116	1.19944
1.47656	0.544861
0.288718	0.307192
0.190501	0.636225
0.165446	0.341769
0.061488	0.207311
0.449945	3.9667
0.148674	0.222787
0.0472856	0.565588
0.32918	0.245412
0.0531709	1.78159
0.857357	0.403868
0.222466	0.270402
0.549868	0.196907
0.574121	0.253019
0.134244	0.669181
0.260422	0.3848
0.396903	0.298881
0.102748	1.40115
0.296594	0.107347
0.0392609	1.36018
0.117784	0.344114
0.147908	0.655894
0.526933	0.228092
0.320136	0.357254
0.7251	0.0668467
0.29737	0.215886
0.0268169	1.5882
0.307744	0.307401
0.0917518	0.317301
0.325525	1.28611
0.0616282	0.452213
0.269114	0.35904
0.390484	0.0417293
0.0761027	0.423515
0.538441	0.197687
0.0696717	0.885793
0.188256	1.0467
0.203694	0.469357
0.210692	0.473742
0.0206621	0.709779
0.370056	0.940667
0.05438	0.391341
0.117021	0.815161
0.980774	0.316258
0.207967	0.85273
0.0746179	0.200651
0.222843	0.0836142
0.248078	3.45479
0.111213	0.121686
0.0819096	0.477082
0.834398	1.62194
0.93763	1.14046
0.0864057	0.857633
0.106591	0.458852
0.348441	0.980835
1.90375	0.165388
0.134849	0.559808
0.181603	0.45143
0.0926923	0.231376
0.829485	0.22374
0.482235	0.655244
0.223855	0.0523324
0.355106	0.413035
0.410364	0.868853
0.630351	0.191679
0.210219	1.21044
0.237661	0.100022
0.431223	0.161547
0.269875	1.86839
0.448014	0.483341
0.0766812	0.406132
0.1938	0.38925
0.255369	0.784932
0.0604428	0.545166
0.927941	0.317975
0.0979459	0.563147
0.826928	0.807277
0.0758515	0.632602
0.297781	1.10365
0.271119	0.421692
0.491031	0.612984
0.146333	0.711753
0.700081	0.741792
0.24486	0.172152
1.84531	0.134314
0.16929	1.55317
0.3909	0.84083
0.177742	0.489283
0.339697	0.710742
0.355379	0.587693
0.295049	0.227968
0.2652	0.27829
0.616741	0.35276
0.0234017	0.694368
0.253198	0.247291
0.233289	0.825285
0.250802	0.761922
0.450969	0.567836
0.307732	0.747978
0.368818	1.1725
0.32973	0.398168
0.494844	0.195387
0.226766	1.29933
0.0615359	0.196043
0.0987061	0.452669
0.149211	1.0581
0.378477	1.38913
0.341076	0.634969
0.0649451	0.553525
0.120582	0.574687
0.0603098	1.50373
0.21025	0.440219
0.15786	0.539962
0.164343	0.733578
0.135604	0.249807
0.259928	1.16098
0.736368	0.398615
0.135579	0.490025
0.3498	0.446642
0.261479	0.362739
0.246238	0.635603
0.115251	0.755004
0.246133	0.804368
0.991346	0.474574
0.242456	0.559001
0.239202	0.617163
0.829211	1.12133
0.750433	0.630021
0.391795	0.249369
0.375582	0.383227
0.660953	0.341698
0.530186	0.788499
0.749557	0.811703
0.0622688	1.06149
0.140918	0.561341
0.563071	0.824163
0.811376	0.504989
0.902922	0.36651
0.666727	1.24196
0.1614	0.706421
0.20649	0.660116
0.200255	0.211029
0.188244	0.336999
0.0993984	1.4493
0.239858	0.644077
0.341309	0.37276
0.154966	0.211852
0.543681	0.22983
0.189123	0.666152
0.130089	1.02323
0.398828	0.719598
0.124938	0.431856
0.111017	1.16768
0.100674	1.50838
0.192303	0.513885
0.224122	0.603642
0.398762	0.897204
0.18651	0.399485
0.210796	0.42423
0.105938	0.971675
0.129936	0.784789
0.0979131	0.273001
0.105668	1.10377
0.220017	0.237036
0.226567	0.308496
0.157384	0.334059
0.128686	0.161594
0.311542	0.897792
0.216717	0.269817
0.697314	0.496036
0.365855	0.632347
0.257355	0.527787
0.291428	0.777254
0.387401	1.82844
0.19696	0.315312
0.572377	1.06447
0.210474	0.701449
0.559554	1.04453
0.173268	0.397828
1.64137	0.689882
0.620222	0.21197
0.103092	0.303362
0.481673	1.33179
0.117019	0.58108
0.503683	0.285757
0.330254	0.374283
0.13388	0.463496
0.325455	0.730653
0.179191	0.662724
0.220371	0.209075
0.413106	1.26785
0.480206	0.491222
0.170245	0.400097
0.167831	1.18104
0.397535	0.796615
0.26046	0.782025
0.0595446	0.551389
0.193619	0.734289
0.143204	0.669226
0.20973	0.485015
0.154855	1.13179
0.0969516	0.349859
0.973902	0.287846
0.494681	1.43529
0.0964237	0.55498
0.0679165	0.233424
0.27133	0.683805
0.0926881	0.685773
0.538332	0.478564
0.186398	0.956162
0.162321	0.401365
0.382772	0.904953
0.596572	0.74679
0.0382374	1.74875
0.231216	1.2848
0.432488	0.863974
0.356951	0.807704
0.438156	0.44727
0.186259	0.599844
0.446033	0.555641
0.16491	0.861409
0.183646	0.930048
0.566205	1.81167
0.342413	0.643427
0.190553	0.316343
0.910051	0.538102
0.277004	0.968308
0.405024	1.16932
0.0556278	0.572303
0.710135	0.422352
0.177103	0.863109
0.324687	0.552327
0.277439	0.680725
0.224709	0.714981
0.0392799	1.00031
0.457399	1.06976
0.215442	0.906596
0.416108	0.985719
0.564407	1.02562
0.297071	0.119933
0.0815669	0.902119
0.404444	0.756992
0.821397	0.641351
0.326507	0.267251
0.353055	0.541148
0.185346	0.38056
0.415853	1.06063
0.554128	0.468982
0.287822	0.344596
0.417525	0.167893
0.907414	1.33455
0.347098	0.145418
0.148309	2.23364
0.113718	1.14871
0.250686	1.49587
0.233255	0.669829
0.252417	0.449169
0.238505	0.120995
0.283115	0.159389
0.239151	0.0910633
0.055597	0.281702
0.155474	0.4754
0.0262698	1.63898
0.155715	0.248508
0.265133	0.270005
0.0810165	1.06163
0.126026	0.524346
0.116092	0.902403
0.21553	0.382611
0.028017	0.362012
0.303306	0.149331
0.180927	0.253052
0.623347	0.372898
0.216695	0.494451
0.212406	0.829159
0.137883	0.6225
0.623594	0.118115
0.128835	0.689759
0.103581	0.250922
0.150299	1.89337
1.00302	0.881911
0.104748	1.04321
0.190101	0.375628
0.154809	0.453206
0.255156	0.22151
0.384155	0.4854
0.453591	0.512259
0.11677	0.908142
0.66685	0.743013
0.443527	0.193073
0.170785	0.472711
0.0985157	0.411478
0.140468	0.380588
0.252137	0.360585
0.524275	0.311515
0.235908	0.655392
0.249918	0.154642
0.232152	0.208841
0.158533	0.140874
0.576535	0.657708
0.667471	0.565628
0.234538	0.50292
0.0706575	0.290936
0.11459	0.502536
0.572152	0.222328
0.216625	0.653877
0.563891	0.37348
0.250578	0.230786
0.327362	0.535214
0.259429	0.658194
0.357333	0.32213
1.10688	0.159043
0.146583	0.459794
0.157947	0.1435
0.7957	0.36376
0.255037	0.282708
0.151235	0.306787
0.14294	0.643598
0.564646	0.0577741
0.113004	0.0657618
0.0317205	0.551281
0.743788	0.154983
0.26881	0.824718
0.641851	0.418826
0.0810198	0.170932
0.133652	0.0992562
0.576934	0.0427954
0.641474	0.0798177
0.257238	0.326921
0.521876	0.583812
0.494563	0.45097
0.218615	0.377832
0.143727	0.566682
0.112609	0.188765
0.581203	0.432223
0.0956624	0.362718
0.583998	0.195103
0.216705	0.51014
0.203846	0.15021
0.352449	0.179461
0.0838755	0.503707
0.24197	0.977896
0.2196	1.48521
0.150493	0.0339068
1.08077	0.939468
1.22597	0.278473
0.147297	1.17422
0.294437	0.274763
0.306619	0.0627824
0.401759	0.441508
0.0227846	0.39983
0.864537	0.560511
0.0822043	1.21731
0.864459	0.279062
0.893143	2.32398
0.309489	0.654356
0.184959	0.242699
0.130887	0.573744
0.0918698	0.501233
0.259705	0.665293
0.468118	0.336346
0.325531	0.217343
0.398411	0.25775
0.25599	0.83782
1.58533	0.416027
1.12898	0.242278
0.461065	0.235532
0.668636	0.386518
0.197342	0.807145
0.101501	0.174458
0.125758	1.15482
1.11112	0.360239
0.113681	1.39055
0.119874	0.364119
0.593602	0.12111
0.137845	0.830369
0.288416	0.365716
0.225185	0.889949
0.262277	0.264324
0.0787454	0.194879
0.0634661	0.237893
0.0523012	0.447419
0.063063	0.56253
0.106082	0.569762
0.0855224	0.484684
0.359334	0.640371
0.117312	0.465118
0.0457463	0.0782001
0.861549	0.554612
0.460163	0.949448
0.503902	1.01261
0.201378	0.227543
0.426367	0.568317
0.309598	0.689448
0.805418	0.657132
0.280376	2.60706
0.473191	1.00048
0.155677	0.34178
0.149599	0.288649
0.471389	0.906211
0.131789	0.687932
0.21675	0.801891
0.338381	0.40306
0.389947	0.57524
0.202554	0.578366
0.147638	0.720974
1.10666	0.904955
0.129862	1.71438
0.976525	0.503107
0.153662	0.940738
0.50939	0.95184
2.64685	1.66783
0.394737	0.98629
0.359009	0.974014
0.219435	0.994078
0.361354	0.875517
0.169324	0.35607
1.12939	0.257605
0.238893	0.0394658
0.109574	0.144605
0.0402659	0.615551
0.277529	0.461261
0.233651	0.475057
0.569635	0.367966
0.250444	0.78984
0.478113	0.631321
0.204164	0.100695
0.0405401	0.0723949
0.301006	0.57669
0.287178	0.29854
0.0931995	0.74542
0.251343	1.43293
0.202098	0.181591
0.658982	0.314199
0.196639	0.739546
0.633627	0.268697
0.583328	0.208997
0.810604	0.0859773
0.100639	0.0343055
0.704171	3.09801
0.303839	0.0605912
0.80132	0.363611
0.259084	0.0631155
0.312418	0.407156
0.264453	0.024632
1.8243	0.626848
0.537382	0.116235
0.143509	0.0455621
0.08324	0.108358
0.199557	1.15506
0.0285197	0.378448
0.416271	0.540522
0.106769	0.142495
0.490652	0.101483
0.221388	1.20571
0.97529	0.868136
0.141484	1.41379
0.0392351	0.282637
0.190892	0.0808057
0.207621	0.807487
0.271785	0.130407
1.47919	0.308481
0.469058	0.352351
0.216307	0.785918
0.0760911	0.541899
0.326257	0.158989
0.696937	0.841302
0.278042	0.284464
0.441635	0.18179
0.709669	0.149243
0.40904	0.436731
0.31662	0.217879
0.221039	0.575359
0.508169	0.765783
0.0526993	0.80376
0.369825	0.290861
0.231125	0.170764
0.0638908	0.531433
0.0550765	0.240913
0.149357	0.635539
0.402871	0.463954
0.100541	0.315949
0.221673	0.255886
0.145827	0.558617
0.483086	1.78924
0.361746	0.458373
0.322567	0.53336
0.339647	0.422544
0.153418	0.401722
0.521774	0.284745
0.0879022	1.03811
0.405922	3.26081
0.239893	0.606284
0.800173	0.330855
0.217336	0.574816
1.99964	1.64049
0.234394	0.706274
0.286875	0.63157
0.56714	0.114931
0.369735	0.938777
0.284874	0.542529
0.076229	0.538912
0.274251	0.682051
0.688571	0.121433
0.168045	0.397772
0.426815	0.25242
0.564563	0.297946
0.243008	0.661092
0.125405	0.440412
0.333447	0.588261
0.0887599	0.169025
0.152165	0.520574
0.835975	0.58049
0.838544	0.375746
0.411572	0.788931
0.578119	0.892698
0.245857	1.0413
0.203634	0.739107
0.308362	0.0889466
0.310535	1.32232
0.314067	0.270217
0.237172	0.672504
1.12147	0.480334
0.623689	0.512368
0.196038	0.454827
0.215672	1.19856
0.65759	0.424658
0.975675	0.276388
0.353247	0.395881
1.22028	0.020355
0.257744	0.261393
0.316439	0.762174
0.42961	0.126238
0.152087	0.284891
0.18917	0.471244
0.305343	0.197751
0.569589	0.334827
0.374928	0.194038
1.83253	0.448323
0.574934	0.251412
1.23139	0.30339
0.286776	0.0580569
0.412204	0.0721122
0.290157	0.427858
0.263673	0.274686
1.30552	0.0985374
0.287401	0.292834
0.139088	0.111555
0.122628	0.222233
1.53021	0.0884957
0.433139	0.233713
0.104395	0.0515329
0.0952512	0.0853674
0.284585	0.189263
0.383333	0.246139
0.241093	0.312574
0.334205	0.412048
0.601631	0.295774
0.447334	0.776738
0.275814	0.472374
0.500905	0.242996
0.775517	1.01611
0.107369	0.360085
0.41888	1.09741
0.309173	0.552211
0.559713	0.196364
0.480901	0.180281
0.0265381	0.605949
0.246523	0.790404
0.369598	0.877298
0.181632	0.985899
0.283436	0.639447
1.13869	0.0861132
1.20743	0.249635
0.13683	0.63696
0.673937	0.836948
1.01196	0.0653013
0.059755	0.116697
0.169401	0.26169
0.0595227	0.387142
0.790846	1.19623
0.209604	0.58731
1.90355	0.672953
0.560654	0.269541
0.0668031	0.251366
0.309617	1.46896
0.385314	0.413769
0.215232	0.260694
0.0661028	0.962306
0.329548	0.071377
0.160599	0.306745
0.171547	0.191869
1.16986	0.244186
0.103791	0.511957
0.622503	0.276822
0.0693404	0.499871
1.12747	0.478905
0.409638	0.96877
0.570067	0.560187
0.131062	1.13321
0.171838	0.840583
0.642563	2.03865
0.242139	0.126411
0.40932	0.746842
0.388834	0.121838
0.935896	0.652572
0.664973	0.177569
1.12009	0.365788
0.609349	0.486075
0.119501	0.657372
0.408019	1.13436
0.388645	0.701164
0.542587	0.431709
0.124677	0.507411
0.44976	0.088457
0.181026	0.137905
0.262082	0.526012
0.157724	0.339065
0.181568	0.894414
0.785339	0.158541
0.428968	0.582691
0.28385	0.510804
1.38403	0.206295
0.268891	0.240266
0.22539	0.498011
0.279016	1.06834
0.802814	0.604683
0.464416	0.838119
0.631616	0.997037
0.25808	0.583607
0.633688	0.143057
0.218512	0.433226
0.252372	0.101872
1.09082	0.329752
0.975101	0.159068
0.583221	1.35202
0.643512	0.404734
3.01617	0.656595
1.73335	0.724418
0.161188	0.0644945
0.074817	0.0936626
0.239307	0.30515
0.350126	0.0864495
0.437822	0.433827
0.655121	0.148601
0.584389	0.247392
0.580309	0.201325
0.415904	0.317103
0.38882	0.126924
0.0888471	0.242616
0.806314	0.223879
0.200061	0.1457
0.0437992	0.445946
0.341943	0.0852964
0.325361	0.683043
0.0893011	0.356121
0.099679	0.198305
0.260201	0.487992
0.238561	0.340949
0.352669	0.618979
0.411683	0.634825
0.24934	0.50639
0.298668	0.232671
0.130388	0.704947
0.20553	0.115419
0.188951	0.553834
0.569647	0.314918
0.0692888	0.0876567
0.184012	0.150252
0.142537	0.69214
0.173293	1.017
0.101304	0.325185
0.464303	0.658934
0.154655	0.230111
0.267777	0.114897
0.101898	0.740984
0.0605475	0.296686
0.0766013	0.357022
0.266472	0.152344
0.149584	0.381459
0.190761	0.567994
0.163614	0.391354
0.32501	0.621954
0.183017	0.398519
0.815193	0.577477
0.674456	0.582097
0.164268	0.336045
0.271329	1.81508
0.158472	0.505583
0.0557416	0.270823
0.179489	0.65365
0.27474	0.627583
0.0977603	0.495652
0.166869	0.407921
0.122838	0.600425
0.283172	1.66592
0.471174	0.403662
0.0933668	0.911327
0.153199	0.463319
0.0865987	0.19813
0.0870764	0.693314
0.582295	0.909767
0.0433174	0.141179
1.44465	0.788671
0.0507191	0.638794
0.0518676	0.558295
1.8437	0.230088
0.435206	0.438321
0.329517	0.823485
0.222154	0.610299
0.295546	0.192966
0.0415279	0.574495
0.917606	0.382562
0.547061	0.357799
1.0508	0.66866
0.194088	0.194262
0.238614	0.142372
0.351225	0.630956
0.128255	0.0407875
0.396122	0.190784
1.04741	1.61442
0.0380274	0.107832
0.180794	0.202304
0.204379	0.641228
0.577428	0.365936
0.16747	0.465118
0.15175	0.105372
0.332027	0.112725
0.122047	0.153951
0.197869	0.183477
0.310093	0.148555
0.722303	0.677205
0.125874	0.356604
0.359674	0.348461
0.0435167	0.962062
0.117845	0.681567
0.197806	0.20425
1.77675	0.280004
0.275506	0.155128
0.353878	0.203281
0.280141	0.0960995
0.197635	0.196309
0.477874	0.384502
0.143233	0.665504
1.90707	1.55031
0.0753676	0.805675
0.620498	0.59884
0.969132	0.420678
0.21915	0.533688
1.8279	0.272548
0.102359	0.845241
0.214338	0.606187
0.512508	0.846052
0.33582	0.1433
0.539151	0.714804
0.168978	0.251874
1.10845	0.622543
1.16409	0.36553
0.567675	0.843778
0.830031	0.174313
0.258691	0.439342
0.183731	0.287577
0.351828	0.585955
0.036314	0.607648
1.29327	0.171651
0.934576	0.686593
0.313696	0.674048
0.256142	0.727523
0.163388	0.701138
0.134391	0.646317
0.822527	0.862671
0.489822	0.504592
0.665246	0.712705
0.154666	0.76694
0.217294	1.58275
0.220943	0.293024
0.2907	0.172752
0.204211	0.452058
0.0333889	0.937048
0.333555	1.14144
0.324218	0.567828
0.626997	0.331333
0.13725	0.286721
0.581595	1.62568
0.837322	0.0947876
0.0595836	0.720562
0.279162	0.487436
0.427471	0.394884
0.852631	0.915389
0.065792	0.225923
0.516065	0.523162
0.83221	0.277879
0.186943	0.308892
0.307245	0.521319
1.63446	0.379827
1.44526	0.449964
0.236792	0.0208914
0.369244	0.584836
0.696218	0.175783
0.42345	0.851619
0.408887	0.717607
0.535545	0.509372
0.786458	0.445682
0.491133	0.370902
0.351772	2.60911
0.0884021	0.392273
0.0979075	0.845758
0.0715843	0.26035
0.58363	0.574218
0.155981	0.279293
1.77387	0.693628
0.667305	0.723324
0.910796	1.69711
0.135131	0.52298
0.21789	0.268906
0.141328	0.898063
0.199449	0.513235
0.282995	0.90748
0.107245	0.538433
0.10843	0.638292
0.392583	0.15028
0.254437	0.672458
0.311529	0.555726
0.278268	0.344992
0.404468	0.109587
0.695596	0.330772
0.702446	0.581235
0.149319	0.36763
0.101154	0.836055
0.890769	0.191206
0.836082	0.426827
0.105822	0.180088
0.103386	0.541303
0.457706	1.01419
0.0785029	0.230406
0.388882	0.453635
0.233763	0.824943
0.706521	0.368599
0.109908	0.316715
0.726299	0.179397
0.389223	0.231369
0.123402	0.538044
0.326323	0.231385
0.826976	1.19472
0.279181	0.332155
0.0692965	0.385053
1.10686	0.29388
0.282612	0.400055
0.103489	0.647467
0.256117	0.745911
0.236921	0.284057
0.0474096	0.117995
0.166465	0.592427
0.185716	1.79691
0.459631	0.0914105
0.350065	0.771936
0.354677	0.430545
0.305416	0.377371
0.508788	0.45343
0.208847	0.413944
0.0968013	0.385526
0.169318	0.210627
0.0780623	0.315858
0.051616	0.236275
0.131154	1.01881
0.0561346	0.479771
0.402847	0.212312
0.530034	0.429549
0.485234	0.288247
0.759219	0.404048
0.565353	0.464247
0.690463	0.429369
0.218215	0.0664722
0.463496	0.276301
0.33972	1.02235
0.396391	0.355826
0.210611	0.174233
0.149732	0.282212
0.046677	0.142477
0.139178	0.475874
0.682512	0.647557
0.229353	0.27978
0.184586	0.88217
0.166049	0.43883
0.116527	0.338141
0.117096	0.482385
0.15153	0.355455
0.200659	0.640071
0.16076	0.383597
0.329948	0.340925
1.2686	0.557759
0.418002	0.726581
0.166382	0.610151
0.45538	0.156107
0.215518	0.501167
0.85767	0.580854
0.772724	0.844017
0.75486	0.412735
0.319088	0.429609
0.255835	0.329297
0.612899	0.492215
0.305484	0.315852
0.579441	0.160198
1.51608	0.244162
0.234635	0.885603
0.225792	1.42646
3.44947	0.483087
0.757397	0.326577
2.04593	0.408433
0.82491	1.04119
0.767799	0.662677
0.142675	0.641215
0.210764	0.466745
0.407256	1.25464
0.126599	0.580203
1.18037	1.07661
0.215372	1.35573
0.269006	0.152345
0.604504	0.244895
0.581413	0.403731
0.117644	0.181151
0.631773	0.225874
0.942503	1.99876
0.0815605	0.397333
0.15084	1.58733
0.428588	0.591707
0.905661	0.268153
0.374636	0.25501
0.0587926	0.372572
0.200159	0.283089
1.05336	0.197833
1.01132	0.520061
0.34806	0.370801
0.455371	0.363568
0.258155	0.0952484
0.273806	0.0781547
0.219225	1.44785
0.539958	0.358809
0.258955	0.820364
0.0726015	0.542532
0.181165	0.521242
0.177225	0.447789
0.141097	0.434718
0.0925976	0.506669
0.143268	0.612414
0.439244	0.291282
0.441483	0.501397
1.11174	0.710688
0.624192	0.549286
0.523997	0.28442
0.401545	0.574118
0.399082	0.235903
0.707858	0.437613
0.452078	0.236864
0.0867977	0.266427
0.524676	3.16517
0.58908	0.477778
0.213852	0.541002
0.300674	0.537447
0.149146	0.407059
0.146527	0.323084
0.389809	0.353105
0.360245	0.218035
0.159347	0.483227
0.308357	0.263342
0.436496	0.346508
0.274986	0.875581
0.0965511	0.263779
0.507928	0.542132
0.302332	0.300842
1.42191	0.464455
0.0969212	0.302757
0.484246	0.428317
0.437638	1.21141
0.387258	0.958998
0.228217	0.419282
0.170043	0.939526
0.88598	0.402863
0.705614	0.942591
0.187894	0.0907087
0.276804	1.99705
0.100247	0.319104
0.329475	0.381876
0.349495	0.261111
0.36565	0.365526
0.461031	0.330568
0.245501	0.674813
0.364179	1.70927
0.587206	0.546722
0.383072	0.418225
0.96465	0.459669
0.217549	0.219911
0.402874	0.13042
0.225559	0.487269
0.3717	0.250062
0.846281	0.219854
1.0292	0.366352
0.100279	0.304706
0.213915	0.444376
0.187906	0.49241
0.549147	0.335343
1.73777	1.66368
0.651619	0.613935
0.441295	0.588992
0.385198	0.674651
0.0880842	0.126553
0.160422	0.85779
0.173482	2.53381
0.255243	0.156699
0.0792059	0.511995
0.480802	0.433292
0.235802	0.337192
0.730304	0.0613601
0.240335	0.776871
0.228397	0.348355
0.221317	1.04086
0.307871	0.125822
0.971537	0.842076
0.213571	0.710025
0.070616	0.710057
1.23751	0.703988
0.29842	0.411141
1.46711	0.482454
0.612301	0.165764
0.22222	0.331259
0.0787025	0.0515124
0.678615	0.0886637
0.650531	0.604854
0.706696	0.253573
0.915893	0.326147
0.200858	1.07401
0.110313	0.619445
0.426286	0.258027
0.438108	0.270139
0.414939	0.690221
0.36585	0.22881
0.332683	0.658243
0.115884	0.111747
0.2823	0.0942414
0.448555	2.65766
0.6219	0.147344
0.0847214	0.71069
0.217149	0.288225
0.36758	0.301532
0.0929894	0.501354
0.236333	0.355437
0.541357	0.592122
3.0349	0.938907
0.0996492	0.401684
1.28951	0.192286
0.434268	0.41233
0.380525	0.0840806
1.5458	0.33804
0.493951	0.79613
0.411517	0.588463
0.167932	0.421863
1.03485	0.150839
0.641265	0.347034
0.485854	0.132779
0.181641	0.448378
0.814065	0.39143
0.279418	0.176651
0.410715	0.403058
0.913895	0.0970635
0.547073	0.986271
0.274029	0.325734
0.521042	0.238823
0.0716141	0.481741
0.0408813	0.851397
0.814629	0.698514
0.456175	0.379427
0.121097	0.265583
0.141187	0.423057
1.35833	0.0974265
0.182091	0.689784
0.541292	0.0455627
1.28495	0.165556
1.12387	0.703183
0.568417	0.162436
1.89609	0.19106
0.351008	0.544822
1.09241	0.602642
0.360827	0.622322
0.617402	0.809994
0.607796	0.446438
0.152438	0.506026
0.129678	0.746875
0.167431	1.39007
1.77968	0.222798
2.58572	0.456278
0.413459	0.452586
0.291457	0.753732
0.16593	0.310367
0.863953	0.300779
0.291658	0.668766
0.0914634	0.0774255
0.0413581	0.480457
0.0927233	0.339564
0.132322	0.43274
0.0282521	0.576141
0.00843916	0.193835
0.550787	0.557024
1.63337	0.348693
0.0312323	1.08197
0.214577	0.331148
0.0110614	0.378325
0.0221098	0.401582
0.0123634	0.549202
0.0245156	0.272068
0.0106893	1.02927
0.690972	0.85976
0.13941	0.276988
0.491774	0.541807
1.63214	0.778362
0.782597	2.45768
0.603045	1.07409
0.584533	0.324021
0.381896	0.118142
0.540501	1.11717
0.173183	0.197284
0.0679196	0.244779
0.409325	0.502717
0.198844	0.367185
0.913975	0.323185
0.404828	0.131962
0.16654	1.1441
0.3421	0.517963
0.276621	0.552493
0.508598	0.642629
0.371515	0.179406
0.21246	0.904194
0.701955	0.368146
0.644644	0.797754
0.432134	0.3687
0.052114	0.290957
0.831243	0.383844
0.225195	0.57344
1.21879	0.46327
0.879755	1.30948
0.281651	1.64547
0.577939	1.14864
0.53343	0.339603
0.409145	0.503974
0.21744	0.446749
1.33654	1.01261
0.354137	0.575927
0.832292	0.515109
0.00964065	0.435162
0.113726	1.96517
0.865003	0.453179
0.0642524	0.183225
0.337119	0.630931
0.325972	0.391553
0.47458	0.24214
0.760942	0.444148
0.316499	0.911569
0.160251	0.662144
0.775071	1.1572
0.347856	0.908337
0.219417	1.02954
0.128129	0.491304
0.460621	0.76542
0.269742	0.489304
0.136369	1.15169
0.0842951	0.0677631
0.440734	2.73358
0.233469	0.207679
0.23733	0.779308
0.0574941	0.590276
0.469251	0.0781792
0.407385	0.57592
0.167477	0.268098
0.119013	0.266988
0.673178	0.375163
0.235153	0.569603
0.338257	0.116192
0.306651	0.208666
0.213716	0.469594
0.0839908	0.16154
0.0754255	0.294646
0.15655	0.540653
0.259632	0.161671
0.167442	1.246
0.960618	0.739122
0.798408	0.738225
0.614867	0.353201
0.320959	0.0182238
0.124743	0.426919
0.331327	0.796143
0.364365	0.997812
0.292521	0.273173
0.588565	0.109179
1.07355	0.617184
0.645156	0.31352
1.16074	0.338675
0.53333	0.9597
0.150406	0.313802
0.694265	0.233724
0.326468	0.116403
0.492329	0.217878
0.0589765	0.297212
0.0929216	1.57471
0.248674	0.268109
0.257973	0.808485
0.167981	0.35889
0.64895	0.258478
0.0335405	0.53362
0.273681	0.422623
0.073772	0.625759
0.420456	0.136658
0.0568448	0.0367878
0.3557	0.572519
0.0822661	0.564233
0.102156	0.503176
0.0554263	0.404593
0.0598821	0.107149
0.850614	0.34662
0.232655	0.0495964
0.369715	0.469106
0.95839	0.0889286
0.177303	0.36143
0.36063	0.355003
0.303918	0.256397
0.356246	0.0518908
0.785354	0.772323
0.660492	0.231094
0.0439109	0.656806
0.48081	0.411493
0.353109	0.563208
0.156633	0.40839
0.28193	0.162742
0.213006	1.04889
1.89319	0.344967
0.700488	0.274956
0.0803999	0.363333
0.713312	0.767164
0.140717	0.743199
0.060874	0.274268
0.534983	0.171425
0.689851	1.71432
0.177983	0.749233
0.522191	0.289124
0.155413	0.223488
0.424486	0.398638
0.297429	0.822371
0.601615	0.207836
0.141157	0.223493
0.512606	0.462295
0.131517	1.30827
0.141566	1.09575
0.582941	0.414875
0.21924	1.08377
0.30989	2.83331
0.408407	1.14929
0.231167	0.746239
0.126967	0.164869
0.11862	0.81766
0.210583	0.104211
0.393993	0.372476
0.561825	0.547175
0.296978	1.35605
0.174016	0.704185
0.0428448	1.01429
1.52143	0.423094
0.439104	0.166114
0.265114	0.749793
0.114937	0.743482
0.148194	1.91116
0.233878	0.807258
0.0477335	0.301472
0.134347	0.141761
0.78692	0.798381
0.0497276	0.396129
0.707425	0.0719929
0.461141	0.267111
0.130363	0.653111
0.402393	0.77227
0.667789	0.501
0.218883	0.489468
0.683614	1.17765
0.822472	0.475591
0.406776	0.212571
0.53226	1.56373
0.417897	2.3635
0.321686	0.536178
0.388959	0.636717
0.95551	0.636057
0.178739	0.710601
0.0991634	1.00176
0.568274	0.689191
1.66303	0.614809
0.216998	3.31321
0.086271	0.65618
0.914836	0.692114
0.609159	0.396867
0.195622	0.244976
0.818828	0.697405
1.00144	0.721598
0.471119	1.10293
0.429577	0.299599
0.655264	0.360457
0.435673	0.388294
0.393185	1.07108
0.236938	0.362531
0.701557	0.364134
0.219114	0.246497
1.0809	1.72961
0.539172	0.482821
1.7738	0.359021
0.5445	0.14991
0.362557	0.396441
1.61746	0.166675
0.0371653	0.276832
0.0523975	0.642292
0.311365	0.314385
0.214549	0.130316
0.606419	0.153904
0.200801	0.294504
1.29946	0.16896
0.206084	0.312705
0.534758	0.318524
0.213068	0.226679
1.42515	0.725256
0.12038	0.181343
0.611723	0.14046
0.465041	0.182819
0.286309	0.445478
0.348603	0.107634
0.310061	0.132017
1.08272	0.12452
0.197133	0.462485
0.375732	0.124474
0.400254	0.0832187
0.788852	0.534584
4.0115	0.122377
0.805516	0.203007
0.393784	0.275225
0.596928	0.240596
0.317302	0.316368
1.08756	0.274968
0.247083	0.590156
0.488532	0.35807
1.28397	0.0548671
0.0691238	0.429241
0.291119	0.211745
0.951063	0.149588
0.114589	0.169595
0.645508	0.0593712
0.0954033	0.140686
0.3148	0.170122
0.631612	0.109015
0.271724	0.364999
0.221201	0.253842
0.0477532	0.346079
0.359267	0.294979
0.363789	0.334695
0.760512	0.773064
0.102821	0.821624
0.23301	0.403825
0.173129	0.191544
0.2388	0.285482
0.641258	0.23864
0.260162	0.455817
0.561744	1.68692
0.28875	0.239036
1.09508	0.141136
0.255747	1.07273
0.349193	0.109508
0.463828	0.280774
0.396963	0.316373
0.669753	0.201882
0.128487	0.401553
0.146337	0.168482
0.441501	0.15457
0.5646	0.182404
0.263732	0.247573
0.443219	0.224448
0.137425	0.19916
0.144955	0.707544
0.616161	0.342281
1.43967	0.345664
0.363787	0.219096
0.162154	1.06241
0.364613	1.06445
0.100748	0.211215
0.40945	0.218517
0.0418603	0.581567
0.520486	1.84965
0.111473	0.325696
0.369205	0.507192
0.36883	0.286708
0.078178	0.377615
0.25963	0.412791
0.244707	0.383889
0.221695	0.105808
0.302072	0.468706
0.237533	0.147625
0.15305	0.761084
0.172437	0.636321
0.392045	0.296134
0.37015	0.355772
0.186106	0.508329
0.191293	0.21256
0.390995	0.439717
0.50317	0.588697
0.474699	0.973737
0.184741	0.478437
0.255886	0.390224
0.0707826	0.0852419
0.290684	0.0676477
0.389062	0.333979
0.142347	0.215992
0.148573	0.189766
0.5745	0.419998
0.266247	0.53992
0.421094	0.224632
0.109868	0.0853604
0.699513	0.27957
0.380159	0.319224
0.344595	5.3986e-06
0.292899	0.378461
0.817574	0.58602
0.489321	0.817559
0.18381	0.101141
0.59167	0.652008
0.194315	2.35408
0.292773	0.532571
0.542443	1.24992
0.370408	0.333742
0.469971	0.538715
0.205398	1.02608
0.288312	0.492441
0.955766	0.353039
0.103048	1.25961
1.00152	0.377436
0.350498	0.453245
0.362108	0.431286
0.378373	0.384829
0.204295	0.209517
0.501588	0.0601865
0.0305448	0.323232
0.380831	0.140039
0.0550515	0.138397
0.136988	0.372763
0.102511	0.419337
0.057638	0.0965598
0.0576115	0.629076
0.268246	0.151889
0.481333	0.179028
0.135836	0.302167
0.183715	0.347529
0.185112	0.429052
0.401236	0.244573
0.0821356	0.570627
0.316617	0.105828
0.0884946	0.196212
0.287548	0.168891
0.139013	0.215985
0.146634	0.0682213
0.421498	0.39331
0.745225	0.442128
0.555519	0.181135
0.0753877	0.178731
0.237273	0.15429
0.507185	0.239331
0.192264	0.511401
0.601683	0.826166
1.37933	0.248814
0.198693	0.28554
0.194009	0.124372
0.149021	0.416675
0.0239114	0.170583
0.080062	0.819929
0.275128	0.281516
0.225768	0.391314
0.0912031	0.30594
0.0416738	0.810147
0.240217	0.468294
0.790663	0.160778
0.223484	1.12101
0.253921	0.538977
0.2939	0.295463
0.126945	0.317331
0.135355	0.249463
0.0535236	0.242918
0.185127	0.290492
0.383182	0.839047
0.278712	2.53063
0.22306	0.387897
0.154826	0.374045
0.114275	0.344303
1.0779	1.78934
0.123145	0.36147
0.318874	0.930024
0.0776273	0.346668
0.652653	0.760941
0.24801	0.492946
0.087897	1.86712
0.22448	0.776083
0.0370397	0.386015
0.13392	0.519817
0.427142	0.521835
0.35898	0.473119
0.0954914	0.423183
0.31088	0.161776
0.498627	0.225125
0.19212	0.193805
0.324772	0.559486
0.0633018	0.880373
0.25644	0.199492
0.065369	0.437307
0.0774117	0.635248
0.0277099	0.566098
0.413523	0.459218
0.44638	0.481889
0.203086	0.297437
0.236055	1.00184
0.224467	1.88293
0.383832	0.606008
0.124666	0.729441
0.176004	0.0819913
0.144454	0.661456
0.165602	0.579783
0.271263	1.69933
0.331575	2.66928
0.19873	0.305621
0.0442675	0.558469
0.412618	1.11492
0.557433	0.471377
0.168547	0.655675
0.0394152	0.353039
0.0623552	1.23736
0.289882	0.458994
0.40237	0.470815
0.719569
0.0620166
0.374954
0.783066
0.250599
0.0460979
0.139992
0.219631
0.310353
0.161087
0.276758
0.246783
0.222591
0.112731
0.162052
0.182169
0.743266
0.345242
0.148318
0.0477036
0.128033
0.267259
0.148474
0.872047
0.0892173
0.101518
0.122357
0.242158
0.128975
0.0808634
0.023473
0.0851966
0.26528
0.0537642
0.353595
0.26674
0.31697
0.071158
0.208054
0.393427
0.300108
0.41805
0.399759
0.148911
0.240518
0.267346
0.0727899
0.279426
0.0634445
0.26694
0.326744
0.0273118
0.120632
0.590817
1.30514
0.0881623
0.805166
0.0725934
0.0638167
0.239112
0.796576
0.0285308
0.113573
0.281871
0.102167
0.159773
0.312832
0.413464
0.380098
0.175865
0.228514
0.379665
0.330155
0.546847
0.408641
0.592692
0.0324474
0.514328
0.117815
0.439917
0.610198
0.121875
0.51927
0.266
0.655789
0.326867
0.27129
0.210159
0.187381
0.824187
0.499722
0.232768
0.28681
0.245
0.268799
1.05528
0.738501
0.181897
0.7291
0.233104
0.317511
0.579752
0.093463
1.71492
1.3286
0.928638
0.196381
0.119103
0.241075
0.143345
0.0790579
0.509756
0.289632
0.503323
0.172765
0.305979
0.0898217
0.225247
0.594224
0.109934
0.375276
0.243237
0.505081
0.533743
0.92877
0.607744
0.223671
0.345025
1.01887
0.147241
0.0912994
0.174869
1.57146
0.573533
0.255827
0.180029
0.739044
0.124
0.292755
0.0584541
0.0390137
0.613315
0.232054
0.117184
0.145816
1.04683
0.658276
0.544471
0.128505
0.332823
0.31182
0.243518
0.138886
0.0892758
0.358889
0.56957
0.264954
0.47088
0.410796
0.146109
0.231701
0.378795
0.0322673
0.795515
0.542956
0.400818
0.423915
0.236392
0.103678
0.280047
0.738209
0.351871
0.430416
0.430667
0.0714498
0.37852
0.437141
[truncated: 2,210 more rows]
