# Supplementary material for: Control of nuclear size by osmotic forces in Schizosaccharomyces pombe
Source: eLife. 2022 Jul 20;11:e76075. doi: 10.7554/eLife.76075 (PMC9410708; doi:10.7554/eLife.76075)
Supplement: Figure 4—source data 2. — Related to Figure 4C, Figure 4—figure supplement 1. [file elife-76075-fig4-data2.xlsx]

## Sheet: Sheet1
Concentration [M]	0.1	0.2	0.3	0.4	0.5	0.6	0.7	0.8	0.9	0.10	0.11	0.12	0.13	0.14	0.15
Deff	0.915500000000000	0.743600000000000	0.648600000000000	0.395500000000000	0.302600000000000	0.240000000000000	0.174400000000000	0.130500000000000	0.0947000000000000	0.0800000000000000	0.0651000000000000	0.0401000000000000	0.0349000000000000	0.0240000000000000	0.0202000000000000
SEM	0.0600000000000000	0.0414000000000000	0.0346000000000000	0.0211000000000000	0.0139000000000000	0.0137000000000000	0.00940000000000000	0.00730000000000000	0.00740000000000000	0.00500000000000000	0.00790000000000000	0.00780000000000000	0.00370000000000000	0.00350000000000000	0.00310000000000000
N	162	273	279	304	392	317	453	337	297	298	149	181	163	84	126
