# Supplementary material for: Control of nuclear size by osmotic forces in Schizosaccharomyces pombe
Source: eLife. 2022 Jul 20;11:e76075. doi: 10.7554/eLife.76075 (PMC9410708; doi:10.7554/eLife.76075)
Supplement: Figure 4—source data 3. — Related to Figure 4D. [file elife-76075-fig4-data3.xlsx]

## Sheet: Sheet1
Protoplasts
Concentration	0.100000000000000	0.200000000000000	0.300000000000000	0.400000000000000	0.500000000000000	0.600000000000000	0.700000000000000	0.800000000000000	0.900000000000000	1
Volumes	195.300000000000	132.500000000000	105.300000000000	85	75.8000000000000	71.5000000000000	68.8000000000000	62.4000000000000	60.5000000000000	55.5000000000000
STD (Vol)	52.5000000000000	25.4000000000000	38.1000000000000	23.2000000000000	23.9000000000000	23.5000000000000	24.5000000000000	17.1000000000000	18.4000000000000	18
Deff	0.915500000000000	0.743600000000000	0.648600000000000	0.395500000000000	0.302600000000000	0.240000000000000	0.174400000000000	0.130500000000000	0.0947000000000000	0.0800000000000000
SEM(Deff)	0.0600000000000000	0.0414000000000000	0.0346000000000000	0.0211000000000000	0.0139000000000000	0.0137000000000000	0.00940000000000000	0.00730000000000000	0.00740000000000000	0.00500000000000000
Whole cells
Concentration	0	0.100000000000000	0.200000000000000	0.300000000000000	0.400000000000000	0.500000000000000	0.600000000000000	0.700000000000000	0.800000000000000	0.900000000000000	1	1.20000000000000	1.50000000000000
Volumes	88.1000000000000	85.9000000000000	79.5000000000000	66	58	66.7000000000000	56.1000000000000	58.1000000000000	51	52.3000000000000	37.1000000000000	47.1000000000000	42.4000000000000
STD (Vol)	20	21	17	10.6000000000000	12.7000000000000	14.3000000000000	11.4000000000000	12.4000000000000	15.1000000000000	9.40000000000000	7.30000000000000	11.1000000000000	8.60000000000000
Deff	0.404900000000000	0.335200000000000	0.263800000000000	0.200800000000000	0.169300000000000	0.136600000000000	0.0898000000000000	0.0603000000000000	0.0528000000000000	0.0367000000000000	0.0377000000000000	0.0201000000000000	0.00360000000000000
SEM(Deff)	0.00620000000000000	0.0120000000000000	0.00960000000000000	0.00780000000000000	0.00620000000000000	0.00570000000000000	0.00350000000000000	0.00220000000000000	0.00310000000000000	0.00170000000000000	0.00400000000000000	0.00260000000000000	0.000144630000000000
