# Supplementary material for: Control of nuclear size by osmotic forces in Schizosaccharomyces pombe
Source: eLife. 2022 Jul 20;11:e76075. doi: 10.7554/eLife.76075 (PMC9410708; doi:10.7554/eLife.76075)
Supplement: Figure 4—source data 4. — Related to Figure 4E. [file elife-76075-fig4-data4.xlsx]

## Sheet: Sheet1
Cyto GEMs			Nucleus GEMs
Mean	SEM	N	Mean	SEM	N
1	0.0306248	3415	1	0.0453592	1595
0.827859	0.0511119	583	0.845626	0.0720373	263
0.651519	0.0517036	576	0.709929	0.0846931	251
0.495925	0.054157	587	0.509243	0.0698353	349
0.418128	0.0519338	628	0.392987	0.0774808	158
0.374907	0.0594495	554	0.324948	0.110656	209
0.221783	0.0542879	687	0.246426	0.0806843	204
0.148926	0.0517967	652	0.238041	0.0987405	219
0.130403	0.0740245	494	0.138365	0.127363	259
0.0906397	0.0616339	601	0.102344	0.134411	71
0.0931094	0.121413	588	0.117019	0.174145	154
