# Supplementary material for: Control of nuclear size by osmotic forces in Schizosaccharomyces pombe
Source: eLife. 2022 Jul 20;11:e76075. doi: 10.7554/eLife.76075 (PMC9410708; doi:10.7554/eLife.76075)
Supplement: Figure 5—figure supplement 1—source data 1. — Related to Figure 5—figure supplement 1. [file elife-76075-fig5-figsupp1-data1.xlsx]

## Sheet: Sheet1
Volume Cell	Volume Nucl	N/C Ratio	Condition
77.22586	6.1068	7.9077138150355335	Control
82.52009	5.93277	7.189485614957521	Control
80.52476999999999	6.250369999999999	7.762046386472138	Control
92.39663	5.81876	6.297588992152637	Control
63.36521	5.43775	8.5816017969482	Control
60.39445	5.03225	8.332305369119183	Control
83.30499	5.63406	6.763172290159329	Control
76.77883	5.42774	7.069318456663119	Control
108.44028	7.9112100000000005	7.295453313104688	Control
81.71677	6.1302900000000005	7.501875074112695	Control
77.7283	5.6527400000000005	7.272434878930841	Control
98.76581	7.278569999999999	7.369523927359071	Control
136.43459	9.01459	6.60726139903378	Control
90.61216999999999	7.7981300000000005	8.606051482929944	Control
90.18051	6.50871	7.217424252757053	Control
88.02638	6.27048	7.123410050487138	Control
86.62885	5.62819	6.496900282065386	Control
74.48568	6.318219999999999	8.482462669334561	Control
76.77249	6.0845400000000005	7.92541703414856	Control
64.55731999999999	5.33597	8.265476323986189	Control
94.62581	6.949	7.343662368649737	Control
92.67412	7.020630000000001	7.575610105604456	Control
76.58998000000001	5.56412	7.264814535791757	Control
76.90048	5.99559	7.7965573166773465	Control
81.55549	6.05804	7.428120412249377	Control
87.42796	6.065259999999999	6.937437405607999	Control
76.53244000000001	5.90636	7.717459419822497	Control
96.47747	7.429060000000001	7.7003055739334805	Control
82.3998	6.14794	7.461110342500832	Control
108.05729	7.63886	7.069268533386317	Control
99.20831	6.82989	6.884393051348218	Control
108.54127	8.66447	7.982650285923501	Control
104.27763	7.786160000000001	7.466759649217192	Control
96.82204	7.6066	7.856269089145405	Control
114.23571000000001	8.40168	7.354687951779702	Control
87.87895999999999	7.393210000000001	8.412946625676955	Control
77.48038000000001	6.27121	8.09393294147499	Control
84.66544	7.00435	8.272974191122138	Control
104.94726000000001	8.059239999999999	7.6793238813476385	Control
79.34476	6.08828	7.67319732267134	Control
59.39201	4.89239	8.23745483609664	Control
58.342530000000004	4.20538	7.208086450827551	Control
50.703	4.1566	8.19793700569986	Control
66.68890999999999	5.0850800000000005	7.62507589342816	Control
75.54428	5.15683	6.826234891642359	Control
72.72008000000001	5.0967	7.0086556560443825	Control
80.2453	5.32848	6.640239366043868	Control
73.52695	6.054180000000001	8.233960472996635	Control
115.99888	8.13087	7.009438366991129	Control
92.19351999999999	6.50469	7.055474180831799	Control
105.66833000000001	8.74455	8.27546910223716	Control
109.47223999999999	8.35012	7.627614087370461	Control
67.89796	5.46157	8.043791006386643	Control
71.98422	5.2756	7.328828457125742	Control
105.30786	7.00644	6.653292546254382	Control
74.05405999999999	6.23367	8.417728886167755	Control
68.48491999999999	5.8717	8.573712285857967	Control
72.63408000000001	5.00899	6.896198038166104	Control
64.35956	4.571680000000001	7.1033425337277025	Control
64.21927	4.85188	7.555177752721264	Control
67.11842	5.455830000000001	8.128662742656935	Control
67.81575	5.82954	8.596144700899128	Control
117.21803999999999	8.79699	7.504808986739583	Control
99.09885	8.06369	8.137016726228406	Control
86.34696	5.97674	6.921772347283564	Control
83.65554	6.18614	7.394776245542135	Control
120.20664	9.1893	7.64458602286862	Control
115.85396000000001	8.87268	7.6585038612404785	Control
101.2596	7.86942	7.7715298105068555	Control
68.11994	5.34141	7.8411842406202945	Control
72.82236	5.08629	6.984516843453028	Control
101.34538	7.6749600000000004	7.573073385288999	Control
66.8608	5.23707	7.832795898344022	Control
101.75447	6.609439999999999	6.495478773561496	Control
96.76515	7.11218	7.349939518514671	Control
71.16006	5.43842	7.642517445881861	Control
91.43088	6.31844	6.910619256863764	Control
77.67000999999999	6.1601	7.931117814971314	Control
56.9937	5.02055	8.80895607760156	Control
103.74606	6.785260000000001	6.540258010762049	Control
66.54536	4.88088	7.334666158542083	Control
71.91322	5.46981	7.606125827768524	Control
72.29049	5.23064	7.235585206297536	Control
71.58681999999999	5.2033	7.268516746518423	Control
77.98743	5.8798699999999995	7.539509892812212	Control
73.63465	5.15831	7.0052753696799	Control
70.61277	5.17352	7.326606787979002	Control
59.60943	4.72634	7.928846157394896	Control
102.22173000000001	8.03849	7.863778083192291	Control
102.45391	7.14232	6.971251756033518	Control
125.67996000000001	9.13596	7.269225738136773	Control
70.14833	5.0617	7.2157099106992275	Control
78.93209	4.95207	6.273836154598211	Control
64.84772	4.72917	7.292731340438801	Control
68.87465999999999	4.76162	6.913456995649779	Control
106.81703	9.0605	8.482261676813144	Control
118.14599	8.36099	7.076829268602344	Control
95.63964	7.81135	8.167481600725388	Control
110.8857	7.374219999999999	6.650289442191373	Control
118.14967	8.74835	7.404464185130606	Control
110.00493	7.63369	6.939407170205916	Control
77.10436	5.36083	6.9526937257503985	Control
75.55518000000001	5.58844	7.396501470845545	Control
89.85708000000001	7.15423	7.961787763412744	Control
121.25033	7.89923	6.514811134947014	Control
105.83492	7.518619999999999	7.104101368433027	Control
110.96976000000001	7.33225	6.607430709050825	Control
113.63304	8.700510000000001	7.65667274236437	Control
112.13253	8.72388	7.779972502181123	Control
138.37496000000002	10.51595	7.599604726173001	Control
80.79269000000001	5.74862	7.115272433681809	Control
78.17519	5.74247	7.345642524181904	Control
111.10706	7.7744	6.997215118463219	Control
101.99231999999999	7.14346	7.003919510802382	Control
116.10388	7.82791	6.742160554841062	Control
43.639340000000004	6.1824699999999995	14.167194095969368	Control
85.23589	6.17052	7.239344834669996	Control
76.87210999999999	5.71359	7.432591612224512	Control
77.70924000000001	5.58211	7.183328520520854	Control
87.87066	5.76919	6.565547590060208	Control
83.49701999999999	6.05399	7.250546187157339	Control
86.78307	6.0475699999999994	6.968605743032598	Control
108.77856000000001	8.05159	7.401817049242054	Control
130.35869	8.72132	6.690248268067131	Control
87.58851	6.673310000000001	7.618933122620765	Control
90.42713	6.49003	7.177082806896558	Control
84.66093000000001	6.01131	7.100453538603933	Control
88.69400999999999	5.94626	6.704240793713128	Control
69.21469	5.975140000000001	8.632762784894362	Control
82.3426	5.80295	7.0473242282852375	Control
101.52239	6.67501	6.5749141642548015	Control
95.71058000000001	6.98042	7.293258488246544	Control
98.50347	6.93049	7.035782597303425	Control
91.3621	6.477869999999999	7.090325200493421	Control
84.1547	6.1197099999999995	7.271976490914945	Control
84.19485999999999	5.6108	6.664064765948896	Control
78.60265	5.5308	7.036403988924038	Control
68.17938000000001	5.22313	7.660864619185448	Control
66.919	4.650869999999999	6.949999252828046	Control
87.30133000000001	5.494	6.293145820344318	Control
112.40398	8.76569	7.798380448806171	Control
98.57728	6.44298	6.535968531491232	Control
91.23399	6.641210000000001	7.279315527031099	Control
83.38448000000001	6.09305	7.307175148181051	Control
73.27681	5.56056	7.588430773664956	Control
91.66592	6.09387	6.647912332085905	Control
81.60083	5.70624	6.992870048012992	Control
132.34603	10.16492	7.6805628397013495	Control
93.96133	6.20962	6.608697429038095	Control
83.68933	6.29371	7.520325470403455	Control
93.9628	7.62587	8.115839459871353	Control
107.45805	7.01536	6.528463898237498	Control
92.01122	7.28837	7.921175265364376	Control
111.57038999999999	7.13645	6.396365558998225	Control
100.85964	7.70127	7.635631061145965	Control
98.27166	7.75517	7.891563040656889	Control
121.76653999999999	8.86171	7.277623228844313	Control
129.85641999999999	8.69938	6.6992298108942165	Control
100.46616	7.884360000000001	7.847776803652096	Control
110.73425	8.224210000000001	7.426979457575232	Control
78.79828	5.85883	7.435225743506075	Control
93.80159	6.6929	7.135166898556837	Control
91.69784	6.470619999999999	7.056458472740469	Control
90.24602	6.51412	7.218179815575246	Control
92.61838	7.523110000000001	8.122696596507087	Control
98.33027	8.39838	8.54099149732834	Control
89.2364	5.84114	6.54569211666988	Control
145.02942	9.18335	6.332060074431796	Control
68.64653	5.17075	7.532427349204688	Control
75.74	5.76587	7.612714549775548	Control
72.85388	4.9775	6.83216871908538	Control
110.08238999999999	8.07657	7.336841069675177	Control
174.43613	11.00495	6.308870759744554	Control
91.6806	7.1661	7.81637554728045	Control
114.24651000000001	9.049660000000001	7.9211697582709535	Control
124.06345	8.44238	6.8048889499687455	Control
101.72993000000001	7.15522	7.033544601868889	Control
100.16431999999999	7.296069999999999	7.28410076562193	Control
90.34316	6.98992	7.737077162233422	Control
93.36478000000001	8.16165	8.741679678354085	Control
113.97553	7.055560000000001	6.1904164867669405	Control
129.83789	8.04385	6.195302465251093	Control
113.30776999999999	8.548119999999999	7.54416047549078	Control
150.5252	10.45663	6.94676373125563	Control
71.48325	5.64489	7.896800998835392	Control
90.33673	6.16247	6.821666004514443	Control
81.32318000000001	6.4964	7.9883742863965725	Control
77.9581	5.86526	7.523605629177725	Control
80.79387	6.117780000000001	7.572084367291727	Control
82.04373000000001	5.94696	7.2485246587399175	Control
63.4146	4.62427	7.29212200345031	Control
77.50738	5.1996	6.708522465860671	Control
97.40553	6.5472	6.7215896263795285	Control
96.65519	7.26627	7.517723569732778	Control
80.87819	5.37248	6.642680801832979	Control
75.46164	6.10684	8.09264150633355	Control
79.05369	6.2246	7.873889251722469	Control
70.99419	5.59711	7.883898668327648	Control
95.98321999999999	5.5634	5.796221464543491	Control
97.95336999999999	6.39708	6.530740085818384	Control
82.32216	7.03982	8.551549181897073	Control
106.43588999999999	7.46882	7.017200682965117	Control
113.26444	7.94232	7.01219199953666	Control
140.99043	9.42545	6.685170050194186	Control
91.48753	6.66212	7.281997885394873	Control
92.19189	6.758210000000001	7.330590575808785	Control
79.5185	6.39185	8.038192370328916	Control
89.70951	6.7546100000000004	7.529424695330518	Control
101.35019	7.16555	7.0700903471419245	Control
83.21259	6.2731699999999995	7.538727012342722	Control
101.33100999999999	6.89913	6.8085080766489945	Control
73.86963	5.86575	7.940678733601346	Control
96.5402	6.689439999999999	6.929175618032694	Control
85.05230999999999	5.90476	6.942503971967369	Control
83.64701	6.41059	7.6638603101294365	Control
96.82083	6.89405	7.120420264936792	Control
75.39733000000001	5.77266	7.656318864341747	Control
97.95765	6.97677	7.122230882427254	Control
116.87503000000001	8.03355	6.8736239040965375	Control
74.96598	5.85615	7.811743406809329	Control
122.29732	8.96048	7.326799965853708	Control
117.59125	7.958419999999999	6.767867507148703	Control
81.88507	5.3613599999999995	6.547420671436196	Control
106.25822	7.32038	6.889236428014699	Control
116.16561000000002	8.74947	7.531893475185986	Control
114.19442	8.80808	7.713231522170699	Control
89.6715	6.6001199999999995	7.360331878021445	Control
123.50523000000001	7.6214	6.170912762155902	Control
92.6631	7.11307	7.676270273711973	Control
78.91045	7.09961	8.99704665224948	Control
139.77375	8.18935	5.859004283708493	Control
82.78945999999999	6.5451	7.905716500627012	Control
80.56711999999999	6.10874	7.582174961696535	Control
126.6404	7.811730000000001	6.168434401660134	Control
91.28138	6.8806899999999995	7.537889983696565	Control
91.81203000000001	6.62437	7.2151438106749195	Control
91.76675	6.8101899999999995	7.421195585547053	Control
73.7956	5.54524	7.514323347191432	Control
80.95175	6.04355	7.465619952626101	Control
81.81676999999999	5.89078	7.1999664616435	Control
74.9445	5.85786	7.816264035386185	Control
79.48862	6.18919	7.786259215470088	Control
81.0191	5.71161	7.049708031809784	Control
70.89543	5.87015	8.28001184279438	Control
81.53291	5.76772	7.074100507390206	Control
86.32070999999999	5.93973	6.881002253109364	Control
109.21283999999999	8.41739	7.707326354666723	Control
111.67374	8.07693	7.232613504302803	Control
74.50652	6.18727	8.304333634157118	Control
85.58429	5.63433	6.5833694478274	Control
89.5274	6.44022	7.193574257713281	Control
70.12546999999999	5.56146	7.9307275944104205	Control
75.08445999999999	5.56786	7.4154625337919455	Control
73.09900999999999	5.9961400000000005	8.202764989566893	Control
95.35531	7.11867	7.465415402666091	Control
90.32836999999999	6.104369999999999	6.757976480700361	Control
60.11975	5.04522	8.391951064334098	Control
78.44393000000001	4.95987	6.322821918789637	Control
111.54671	9.01803	8.084532479711863	Control
113.19966000000001	8.4653	7.478202673046896	Control
93.068	6.27118	6.738277388576096	Control
111.33596999999999	7.16246	6.433194950383061	Control
72.25022	5.22438	7.230953760417616	Control
60.55746	4.797630000000001	7.922442585934088	Control
78.83883	6.29175	7.980521780954892	Control
85.93803	6.72122	7.821007765712107	Control
84.75546	5.75957	6.795515002809259	Control
102.69762	7.19942	7.0103085154261615	Control
121.36231000000001	8.770389999999999	7.22661755531845	Control
99.13104	7.9249	7.994367858947108	Control
114.65202	7.99142	6.970151943245309	Control
77.72192	6.75033	8.68523320062088	Control
100.90592	7.985989999999999	7.914292838319099	Control
95.71812	6.92271	7.2323923620731385	Control
61.893190000000004	4.52619	7.312904699208425	Control
62.78015	4.13471	6.586014847049586	Control
93.36708	7.315	7.834667208185155	Control
62.00136	5.14121	8.29209230249143	Control
106.42048999999999	7.28672	6.847102470586257	Control
83.16297	6.4221	7.722307175898119	Control
88.01868	5.9961400000000005	6.812349378563733	Control
87.29793000000001	6.4634599999999995	7.403909806337904	Control
82.85767	6.26848	7.565358765217511	Control
91.25962	6.12794	6.714842774931563	Control
68.9036	5.12937	7.444269965575093	Control
76.2593	5.46778	7.169984513364272	Control
120.62385	9.00797	7.467818346040191	Control
82.95291	6.779389999999999	8.172576465370533	Control
88.0716	6.4982	7.378314916499757	Control
101.34441	6.9187	6.8269182286423105	Control
92.93426	6.978289999999999	7.50884550003411	Control
132.18204	9.76052	7.384149919308252	Control
83.20528	5.5694300000000005	6.6936016560487515	Control
70.33991999999999	5.23524	7.442772183988837	Control
81.83586	6.00281	7.335182889261505	Control
67.19778000000001	5.68466	8.45959494495205	Control
126.79137	9.18723	7.245942685215878	Control
63.47505	3.72117	5.862413657019569	Control
46.55372	3.6299300000000003	7.797293105685219	Control
66.1571	5.70637	8.625483886083277	Control
73.48881999999999	5.65804	7.6991847195260465	Control
86.38235	7.03941	8.149130001672795	Control
87.00222	6.38092	7.334203655952686	Control
83.6826	5.83465	6.97235745543279	Control
85.64533	6.3818	7.451427882874641	Control
108.00423	7.54545	6.986254149490255	Control
91.76325	7.973319999999999	8.689012213495054	Control
99.11125	8.11252	8.185266556521082	Control
116.17528999999999	9.13925	7.8667761449099896	Control
173.27756000000002	11.23793	6.485507990763489	Control
124.75158	9.44052	7.567455257881302	Control
137.8428	11.13504	8.07807154236565	Control
72.38833000000001	5.2695300000000005	7.279529725302407	Control
71.48306	5.40205	7.557105137916592	Control
75.56336	6.24982	8.270966246074817	Control
83.89018	5.8377099999999995	6.958752502378704	Control
61.00085	5.70146	9.346525499234847	Control
74.21383	5.606	7.553848116988437	Control
88.19638	6.5759	7.455974950445811	Control
71.48439	4.97093	6.953867830445219	Control
97.44445	7.09479	7.280855913292136	Control
77.38552	5.539969999999999	7.158923271433724	Control
101.78737	8.004760000000001	7.864197689752669	Control
116.09871000000001	8.256089999999999	7.111267644575895	Control
72.49361	6.5172	8.990033742284318	Control
93.61256999999999	6.690510000000001	7.147020960967103	Control
123.09108	8.865310000000001	7.2022359378112535	Control
100.59179	6.863239999999999	6.822862979175537	Control
94.45577	6.71992	7.114356274899881	Control
112.799	6.95713	6.167723118112749	Control
111.92724	8.37325	7.480976034073565	Control
131.48078999999998	9.85305	7.493908425709947	Control
74.54516	5.80645	7.78917102062696	Control
89.23881999999999	6.15424	6.896370884330386	Control
97.19503	6.3282099999999994	6.5108370253088035	Control
80.76533	6.46605	8.005972364627247	Control
74.84479	6.82477	9.118563897366803	Control
112.44321000000001	7.59133	6.751256923383813	Control
99.03009	8.008230000000001	8.086663356561628	Control
85.32807	6.7915399999999995	7.959326866293822	Control
128.16363	9.42646	7.355019516847331	Control
118.56553000000001	8.57964	7.236200943056552	Control
104.54457	7.5838600000000005	7.25418833326303	Control
89.98765	7.391539999999999	8.21394935860643	Control
114.98938000000001	8.65715	7.528651776364042	Control
118.48086	8.122819999999999	6.855807765068551	Control
144.3922	9.980080000000001	6.911786093708663	Control
101.54018	7.7038899999999995	7.587035989103032	Control
131.64918	9.037560000000001	6.864881346013702	Control
123.73971	7.77778	6.285597404422558	Control
98.6362	7.4542399999999995	7.557306546683671	Control
112.68709	9.34883	8.296274222717082	15 min
101.87801999999999	7.90609	7.7603490919827465	15 min
88.66023	7.57295	8.541541117138992	15 min
108.21368999999999	8.8411	8.170038374996732	15 min
92.67611	8.50445	9.176528881067625	15 min
85.88247	7.40247	8.61930263533408	15 min
122.98308	10.37116	8.432997449730482	15 min
126.49408999999999	9.01267	7.12497319044708	15 min
104.90454	8.000810000000001	7.626752855500822	15 min
127.63646000000001	9.550880000000001	7.48287754141724	15 min
92.19996	7.868760000000001	8.53445055724536	15 min
86.95566	7.89538	9.079776980589878	15 min
84.29415999999999	7.3489	8.71816030908903	15 min
87.2565	8.265830000000001	9.473024932240005	15 min
99.46339	8.92264	8.970778092321204	15 min
103.5287	7.96475	7.693277323099778	15 min
100.48295	8.12378	8.084734773411807	15 min
99.53362	8.3983	8.437651519155036	15 min
107.6267	9.03595	8.395639743669554	15 min
106.40252	8.943439999999999	8.405289649154925	15 min
90.89925	10.62679	11.690734522012008	15 min
111.32035	9.77086	8.777245130831874	15 min
81.05389	6.75695	8.336367323024225	15 min
74.91018000000001	6.9817100000000005	9.320108428520662	15 min
68.08676	5.7455300000000005	8.438542236405434	15 min
76.77893	6.48745	8.449518637469941	15 min
74.85455999999999	6.463419999999999	8.6346376226111	15 min
79.17383000000001	7.01053	8.854605113836225	15 min
63.40579	6.54451	10.321628356022375	15 min
67.69698000000001	5.96395	8.809772607286172	15 min
84.94592	7.2889800000000005	8.580729951479718	15 min
79.16838	6.65738	8.409140113767643	15 min
66.61983000000001	6.47668	9.721850085777763	15 min
80.92713	6.63917	8.203886632332075	15 min
82.23541999999999	6.87021	8.35431982958195	15 min
70.66548	6.91321	9.783008620333437	15 min
70.86201	6.44255	9.091683964369626	15 min
68.26768	6.44877	9.44630021116874	15 min
79.83131999999999	6.57453	8.235527108909137	15 min
61.937	5.28292	8.529505788139561	15 min
55.142790000000005	5.20763	9.443900100085614	15 min
79.11477	7.22895	9.137295096730991	15 min
122.21896000000001	10.34848	8.467164178127518	15 min
93.93085	11.21457	11.939176532523659	15 min
77.04825	6.33248	8.218849876538403	15 min
78.50241	6.28961	8.011996064834188	15 min
111.81278	10.085410000000001	9.019908099950651	15 min
74.72882	6.48516	8.678258267693776	15 min
87.22962	7.42735	8.514710943369924	15 min
96.30677	8.23294	8.548661739979442	15 min
89.32691	7.902139999999999	8.846315180946032	15 min
113.89376000000001	10.20743	8.962238141931568	15 min
81.12483	7.46975	9.207723455321878	15 min
102.24526999999999	8.364519999999999	8.180838096471357	15 min
71.88656	6.46135	8.988258723188313	15 min
118.74675	10.59658	8.923680016505713	15 min
72.35994000000001	6.57345	9.084377350229975	15 min
76.87829	6.1887300000000005	8.050035972444237	15 min
108.37618	9.126489999999999	8.421121689286334	15 min
99.34113	8.50268	8.559073165364637	15 min
79.57005	6.221769999999999	7.819236006512501	15 min
77.20626	6.76082	8.756828785645101	15 min
70.73742	6.33007	8.948686565045772	15 min
69.56182	6.07175	8.728566906386291	15 min
70.7091	6.75	9.546154596791641	15 min
67.7124	6.485040000000001	9.577330001594982	15 min
68.35554	5.99087	8.764278652469134	15 min
81.37966999999999	6.321280000000001	7.7676402472509425	15 min
68.21374	5.82544	8.53998036172771	15 min
93.35274	7.2035	7.71643124775984	15 min
68.36157	5.809019999999999	8.497493547910032	15 min
79.22851	5.89674	7.44269960396832	15 min
103.04929	8.35098	8.103869517199003	15 min
113.0189	9.09653	8.048680353463004	15 min
68.30492	6.16571	9.02674360792751	15 min
98.50681	8.66928	8.800691038518048	15 min
80.90213	7.21842	8.92241032467254	15 min
66.22669	6.01147	9.077110753987554	15 min
96.75918	6.804069999999999	7.031963272115369	15 min
84.89116	7.17996	8.457841782348128	15 min
69.74797	6.011	8.618171969736181	15 min
64.49091999999999	5.3247800000000005	8.256635197637127	15 min
76.0042	6.50641	8.560592704087405	15 min
111.34775	7.3239600000000005	6.577555451277642	15 min
86.76047	6.65877	7.674889266966857	15 min
97.79388	6.662260000000001	6.812553096369631	15 min
78.65954	6.90004	8.772031974761102	15 min
63.51484	6.0801099999999995	9.572739221259157	15 min
117.83058999999999	9.30221	7.8945628635144764	15 min
81.46376	6.53996	8.02806057564738	15 min
76.56289	6.4794	8.46284668721361	15 min
106.52349	9.14304	8.583120962334224	15 min
90.51678000000001	7.85007	8.672502490698408	15 min
85.29354000000001	6.22039	7.292920425157637	15 min
78.04893	6.5196	8.353221498360067	15 min
92.98943	7.689439999999999	8.269154892120534	15 min
105.34691000000001	8.418460000000001	7.991178858497132	15 min
92.24998000000001	7.44508	8.070549175186812	15 min
67.69959	5.2839599999999995	7.805010340535297	15 min
97.9179	7.9966800000000005	8.166719261748874	15 min
108.62683999999999	8.470130000000001	7.797455951033835	15 min
117.37848000000001	7.8871199999999995	6.7193918340056875	15 min
65.84600999999999	5.51769	8.37968769861682	15 min
85.14974000000001	6.8082	7.995561701069198	15 min
114.86171999999999	9.30285	8.099173510548162	15 min
135.82119	9.6543	7.108095577722444	15 min
101.1554	7.17767	7.095686438885121	15 min
75.21666	7.06923	9.398489643118959	15 min
87.38188000000001	6.732360000000001	7.704526384646336	15 min
93.51748	7.69405	8.227392354883815	15 min
79.78086	6.651960000000001	8.337789289310745	15 min
77.7583	6.294630000000001	8.095122964365219	15 min
61.5308	5.0585	8.22108602521014	15 min
58.52956	5.04904	8.626478654546524	15 min
119.87231000000001	10.8982	9.091507454890957	15 min
84.27967	6.3052	7.481282259410841	15 min
58.36643	4.75054	8.139164927510558	15 min
87.09107	7.10502	8.158149853940248	15 min
72.57485	6.19639	8.537930150734036	15 min
87.93151	6.47631	7.365175464404057	15 min
75.82597	6.02939	7.951616049224297	15 min
103.12021999999999	8.01976	7.777097449947257	15 min
113.13873999999998	8.48884	7.503035653393347	15 min
69.39081999999999	6.0206	8.676363818729914	15 min
80.41419	6.10701	7.594443219536252	15 min
69.10001	6.8764	9.951373378961884	15 min
78.50367	6.745889999999999	8.593088705279637	15 min
104.6406	9.00331	8.60403132245037	15 min
117.31248000000001	9.01287	7.68278873654363	15 min
132.85977	10.30377	7.755372450215743	15 min
98.96709	7.903919999999999	7.986412452866907	15 min
80.7139	6.95562	8.6176234824485	15 min
112.63513	8.35495	7.417712395768532	15 min
73.89402	6.4948	8.789344523413396	15 min
95.07970999999999	7.67267	8.069723813839987	15 min
103.88131	8.445319999999999	8.1297781092672	15 min
102.99639	8.60158	8.351341246037848	15 min
71.64199	6.7218	9.38248644405327	15 min
71.22223000000001	5.9173	8.30822062156717	15 min
74.83471999999999	7.33427	9.800624629850958	15 min
72.28002	6.02324	8.333201900054815	15 min
49.470009999999995	6.3506	12.83727252127097	15 min
68.62934	7.08444	10.322757001597276	15 min
80.31900999999999	6.43295	8.009249615999998	15 min
83.52557	7.184	8.600958963823894	15 min
96.15746999999999	7.92775	8.244549279426758	15 min
72.09485	5.69485	7.899107911314054	15 min
102.54435	8.30441	8.09835939278956	15 min
88.41985	8.25408	9.335098397022842	15 min
61.61178	4.93658	8.012396330701693	15 min
56.993280000000006	5.46753	9.593288893006333	15 min
88.01803000000001	7.339339999999999	8.338450656075805	15 min
96.99008	7.643689999999999	7.880898747583257	15 min
81.79123	6.87361	8.40384720953579	15 min
77.64449	6.51804	8.394723179970658	15 min
116.18092	9.20074	7.919321003827479	15 min
77.98295	6.6291899999999995	8.500819730466723	15 min
101.22619	8.37706	8.275585596968533	15 min
91.46606	7.85585	8.588814255254901	15 min
107.81154	8.484169999999999	7.869445144740535	15 min
88.51865	7.148389999999999	8.07557503418771	15 min
70.47225999999999	7.53256	10.68868800291065	15 min
75.51742	6.32299	8.372889328051727	15 min
75.57507	6.38892	8.453740102390908	15 min
80.97765	7.04683	8.702191283644314	15 min
57.42782	5.10991	8.897969660001024	15 min
109.07951000000001	8.76549	8.035872181677382	15 min
61.544340000000005	5.551	9.019513410981416	15 min
79.07905	6.48144	8.196153089851231	15 min
66.90762	5.12303	7.656870771968874	15 min
69.35902	5.04148	7.268672481243247	15 min
55.048230000000004	4.94386	8.980960877397875	15 min
64.6018	5.27937	8.17217167323511	15 min
83.5351	10.09051	12.079365440395714	15 min
116.83658999999999	9.21572	7.887700248697775	15 min
81.9422	6.1691	7.528599427401265	15 min
65.90414	6.17128	9.364024779019953	15 min
76.93434	6.4022	8.321641545244944	15 min
69.82441999999999	6.43665	9.218336507485493	15 min
77.66348	6.63352	8.541363328040411	15 min
72.85112	6.43383	8.831477127599412	15 min
85.12989	6.52818	7.668493404607947	15 min
63.40195	5.49611	8.668676594331878	15 min
82.69106	7.29259	8.81907911205879	15 min
90.37243000000001	7.23585	8.006700716136548	15 min
130.4643	10.25339	7.859153806826848	15 min
96.10056999999999	8.3355	8.67372586863949	15 min
104.23791	8.88447	8.523261834394031	15 min
97.56976	8.15037	8.353377111924843	15 min
99.54403	8.61238	8.651829748102422	15 min
106.14941	9.51866	8.96722836236207	15 min
74.32256	5.85241	7.874338558844045	15 min
68.25193	6.0313099999999995	8.836834357651131	15 min
83.60309000000001	6.597389999999999	7.89132315563934	15 min
112.04732	9.385010000000001	8.375934382009316	15 min
86.28517	7.431889999999999	8.613171881100772	15 min
99.97135	7.5909	7.593075416106715	15 min
97.57823	7.84541	8.040123293894549	15 min
105.7906	7.54842	7.1352464207595006	15 min
63.980940000000004	5.312130000000001	8.30267576562645	15 min
59.800869999999996	5.48458	9.171405031398374	15 min
72.4929	5.9455800000000005	8.201603191484958	15 min
74.79866	6.229480000000001	8.328331015555628	15 min
111.42896999999999	8.49291	7.621815045046186	15 min
76.75876	7.020339999999999	9.14597890846595	15 min
89.81456	7.98918	8.89519472121224	15 min
86.60557	7.17835	8.288554650699718	15 min
99.27079	7.8208899999999995	7.878339640492434	15 min
88.32467	8.47509	9.595382581106728	15 min
93.63212	7.525360000000001	8.037156480062611	15 min
73.93370999999999	6.0193900000000005	8.141604147823776	15 min
66.38226999999999	6.12769	9.23091361593992	15 min
105.76315	9.03534	8.54299441724268	15 min
88.27799	8.47767	9.603379052921344	15 min
105.09929	8.48775	8.075934670919281	15 min
98.79271999999999	8.573260000000001	8.678028097616911	15 min
81.42893000000001	8.53701	10.484001202029795	15 min
91.25146	7.00183	7.673115586315003	15 min
81.26606	7.45677	9.175749384183261	15 min
89.78594	7.16325	7.978142234741877	15 min
96.92446	7.3177	7.549900200630471	15 min
85.45888000000001	7.0072	8.199498987115206	15 min
136.98506	11.44908	8.35790413932731	15 min
88.91081	7.32446	8.237985909699844	15 min
78.0243	7.92145	10.15254222082095	15 min
145.24784	11.62582	8.00412591333544	15 min
108.22418	8.93679	8.257664784339322	15 min
116.61193	7.70518	6.607540069013522	15 min
89.21582	7.866110000000001	8.816945245809544	15 min
83.52674	7.3674	8.82040888941673	15 min
144.71208000000001	12.1016	8.362536147638814	15 min
135.8817	11.53937	8.492217863038217	15 min
104.92116999999999	9.17436	8.744050414230037	15 min
125.27283	8.91109	7.113346126211087	15 min
98.66221999999999	7.49915	7.600832415893338	15 min
93.78028	8.48806	9.051007311984993	15 min
106.32893999999999	8.872819999999999	8.344689601908945	15 min
93.3048	7.061389999999999	7.568088672822834	15 min
69.27421	6.680689999999999	9.64383426386241	15 min
92.86773000000001	6.65738	7.168668815313994	15 min
84.67721	6.985189999999999	8.249197157062685	15 min
117.03023999999999	7.95553	6.797841310075071	15 min
117.41956	9.4523	8.050021648863272	15 min
127.5136	9.17803	7.197687148664926	15 min
101.31215	6.03795	5.959749151508482	15 min
91.84923	6.29523	6.853873461976763	15 min
117.93405	9.36086	7.937368385127113	15 min
98.50169	6.711060000000001	6.8131419877161505	15 min
90.43064	6.40148	7.078883882719397	15 min
93.93154	6.56455	6.9886536513720525	15 min
79.34419	6.70148	8.446087861001542	15 min
91.62411999999999	6.5812	7.1828247845654625	15 min
99.89842	7.17542	7.182716203119129	15 min
98.61362	6.62695	6.720116349039819	15 min
78.44373	6.50735	8.295564221640149	15 min
77.92936999999999	6.177169999999999	7.926626379759005	15 min
106.59411000000001	7.297510000000001	6.846072451845604	15 min
86.64084	5.6974800000000005	6.575975025172887	15 min
83.1104	5.91234	7.1138389419374715	15 min
87.14104	6.3867199999999995	7.329175782157292	15 min
91.35665999999999	6.804469999999999	7.448247341792048	15 min
77.84719	5.92496	7.611013319812828	15 min
70.39915	5.84093	8.296875743528153	15 min
83.14627	4.5574	5.481183942466692	15 min
61.37633	5.25695	8.565109709231555	15 min
153.01211	11.242189999999999	7.347255063667836	15 min
115.03585	8.09245	7.034720045968277	15 min
70.58371	5.39347	7.641239033765723	15 min
75.42522	5.23678	6.943009248100304	15 min
87.34263	5.8030800000000005	6.6440408309207095	15 min
108.1251	8.403889999999999	7.7723766267036964	15 min
86.54936	6.20578	7.170220553912819	15 min
95.50981999999999	7.74189	8.105857596632472	15 min
96.74186	7.3772	7.625654499510347	15 min
93.81654	7.00415	7.465794411092117	15 min
83.12147	7.63242	9.182248581503671	15 min
110.93571000000001	8.928139999999999	8.04803070174608	15 min
86.88018000000001	6.33969	7.297049798929973	15 min
81.225	7.43801	9.157291474299784	15 min
86.10862	5.89462	6.845563196808866	15 min
98.44951	6.885839999999999	6.994285700355441	15 min
129.31734	10.688989999999999	8.265705125082219	15 min
126.88238	9.44603	7.444713757733738	15 min
105.23167	7.97266	7.576293334506619	15 min
102.18996	7.441389999999999	7.281918889096345	15 min
88.31278	6.82216	7.724997446575682	15 min
70.4412	5.088419999999999	7.223641845965146	15 min
94.97289	7.04	7.4126416496328575	15 min
61.30921	6.08183	9.919928832878453	15 min
82.41171999999999	5.82797	7.07177328661506	15 min
77.32056999999999	7.5650699999999995	9.784032890600782	15 min
74.5555	5.97246	8.0107570870023	15 min
120.35726000000001	8.356869999999999	6.943386713855067	15 min
96.64968	7.52203	7.782777966776506	15 min
89.66443000000001	6.55324	7.30862840482006	15 min
79.81622	7.16268	8.973965442111892	15 min
121.18611999999999	8.56799	7.070108358944077	15 min
102.17305	6.86135	6.715420553658719	15 min
125.92426999999999	9.09782	7.224834418337307	15 min
120.3339	8.93878	7.428314049490625	15 min
97.60807	7.478860000000001	7.662132854383866	15 min
108.52134	7.65977	7.058307610281997	15 min
122.17957	8.43339	6.902455132228735	15 min
87.05018000000001	6.153630000000001	7.069060626870616	15 min
139.75602	10.14444	7.258678373926217	15 min
88.09954	6.99723	7.94241377423764	15 min
85.35200999999999	6.27465	7.351496467394266	15 min
74.73755	5.5214099999999995	7.387732137325882	15 min
66.35609000000001	4.7325	7.131975377090481	15 min
74.48691	5.786580000000001	7.768586453646689	15 min
125.16676000000001	8.471680000000001	6.768314526955879	15 min
85.50891	6.25223	7.3117877423534	15 min
77.90939	5.37686	6.901427414590206	15 min
83.23863	6.17645	7.420172580927869	15 min
79.97137	5.57616	6.97269535334958	15 min
98.85898	7.31363	7.3980431519726375	15 min
93.45276	6.472659999999999	6.92613037859984	15 min
83.02298	5.19735	6.260134242350731	15 min
79.43656999999999	5.34017	6.72255864018298	15 min
92.48169	6.1535400000000005	6.6537927669790635	15 min
117.05301000000001	9.40582	8.035521683722614	15 min
85.10234	6.28552	7.3858368641802326	15 min
101.02389000000001	6.94013	6.869790897974726	15 min
83.05785	7.512169999999999	9.044503319072188	15 min
88.71266	6.55053	7.383985555162026	15 min
74.39158	6.08985	8.186208708028515	15 min
69.94326	5.3924	7.709677815989704	15 min
109.49621	7.15322	6.532847118635431	15 min
80.82258	6.03976	7.472862163024244	15 min
94.96537	6.28276	6.615843227905077	15 min
77.64849	6.27517	8.081509376421874	15 min
100.0534	7.26912	7.265240361646881	15 min
86.94429000000001	8.08215	9.295780090906486	15 min
71.08287	5.6517800000000005	7.950973279497579	15 min
109.59006000000001	7.780819999999999	7.099932238380012	15 min
100.66811	7.515910000000001	7.466028715548549	15 min
81.4041	5.57102	6.8436602087609835	15 min
76.52521	6.14379	8.028452323097186	15 min
75.73329	4.99005	6.588978241932973	15 min
64.85081	6.67105	10.286764344192463	15 min
85.13346	6.87395	8.074322363968292	15 min
79.42325	5.80927	7.314319169764522	15 min
72.96715	5.20071	7.127467634408085	15 min
100.80266999999999	6.7248	6.671251862673875	15 min
122.5427	9.017	7.358251450310789	15 min
81.33095	6.18255	7.601718656919659	15 min
113.36708999999999	8.560089999999999	7.5507715687154	15 min
77.31855	5.1567099999999995	6.669434437143479	15 min
78.91781999999999	5.68685	7.20604041013804	15 min
121.76943999999999	8.84175	7.261058275376811	15 min
86.43611	6.12366	7.084608504478047	15 min
111.57545	7.74563	6.942055801701898	15 min
115.27638	8.61864	7.47650125723934	15 min
77.79805999999999	5.2775300000000005	6.783626738250287	15 min
71.8411	5.25499	7.314740448016526	15 min
95.6914	6.69077	6.992028541749833	15 min
92.32536999999999	7.19067	7.7884009563135255	15 min
102.92284000000001	7.3077	7.100173294868271	15 min
79.13631	5.89257	7.4461015430211495	15 min
90.62267	6.851660000000001	7.560646800629469	15 min
77.81151	5.62737	7.232053458415086	15 min
152.43514	10.61704	6.964955718215629	15 min
75.51808	5.29554	7.012281032568625	15 min
81.55908000000001	6.90251	8.463202380409392	15 min
68.50405	5.03014	7.34283593451774	15 min
60.98055	6.17786	10.130869596945255	15 min
103.12120999999999	7.12741	6.911681893569714	15 min
72.84132	4.94739	6.792010358955605	15 min
74.12639	4.77069	6.435886058932589	15 min
73.51201	4.34774	5.914326108074041	15 min
105.6868	6.811660000000001	6.445137898015646	15 min
76.68165	5.677309999999999	7.403740008202743	15 min
85.27274	5.54044	6.4973167274793795	15 min
78.85485	4.74544	6.017943094178736	15 min
80.85497	5.8894	7.28390598623684	15 min
88.90626999999999	5.96885	6.713643480937846	15 min
72.34036	6.14506	8.494649459858922	15 min
74.79685	5.66213	7.57001130395197	15 min
80.86742	6.14021	7.592934212566693	15 min
124.84908	9.86533	7.9018043224667736	15 min
98.23758000000001	6.37	6.484280252017609	15 min
73.17666	5.62781	7.690717231423244	15 min
84.72683	5.80693	6.853708559614469	15 min
109.29106000000002	7.90955	7.237142726953147	15 min
115.14943999999998	8.45223	7.340226752296843	15 min
127.07073999999999	9.688310000000001	7.624343731688351	15 min
94.39631999999999	6.00751	6.364135805294105	15 min
114.40316000000001	7.79339	6.812215676559982	15 min
96.85505	7.21506	7.449337953983813	15 min
119.61896000000002	8.79354	7.351292805087086	15 min
86.3273	5.74364	6.653329827296811	15 min
84.62991	5.65346	6.680215068171524	15 min
77.77259000000001	5.79168	7.446942425345485	15 min
85.7132	6.26475	7.308967580256017	15 min
100.24124	7.76708	7.7483877892971	15 min
69.1492	5.33277	7.711976421997652	15 min
77.1501	5.6580900000000005	7.333872541966895	15 min
71.55585	5.18706	7.248967065585832	15 min
76.43258	5.42315	7.095338139835132	15 min
70.66150999999999	4.54799	6.436304573734699	15 min
67.33073	5.20897	7.736393174409366	15 min
105.50353	7.19106	6.815942556613982	15 min
90.98604	6.45758	7.097330535541496	15 min
77.33981	5.37085	6.9444830547165814	15 min
134.76061	10.11772	7.5079208976569625	15 min
67.31339	5.08355	7.552063564173488	15 min
107.79118999999999	8.52994	7.9133925509125564	15 min
122.27926000000001	8.9765	7.340983254232975	15 min
88.0315	7.41822	8.426779050680723	15 min
103.05277	8.30372	8.057735857075944	15 min
129.9661	9.9256	7.637068435538189	15 min
133.80657	8.95528	6.69270574681049	15 min
85.39053	5.81957	6.815240519059901	15 min
110.40146000000001	7.41125	6.712999991123304	15 min
125.65331	8.9977	7.160734564015862	15 min
79.14409	5.1584	6.517732404276807	15 min
132.36365	9.75758	7.371797317465936	15 min
117.25554	8.2413	7.0284951994592335	15 min
107.50443999999999	7.775239999999999	7.23248267699455	15 min
121.49191	8.504	6.9996430214983025	15 min
105.89046	7.61781	7.1940475090957205	15 min
75.19344	5.66249	7.530563836419773	15 min
107.40807	7.650239999999999	7.122593302346834	15 min
104.23409000000001	7.17223	6.880887049524775	15 min
134.49489	11.27185	8.380876031795708	30 min
111.93821000000001	9.566880000000001	8.546572256247442	30 min
94.06496	8.358830000000001	8.886231387330628	30 min
87.80951999999999	8.2559	9.40205572243192	30 min
82.41593	8.4289	10.227270383286339	30 min
82.81065	7.39665	8.93200331116831	30 min
127.20866000000001	10.81653	8.50298242273757	30 min
90.12998	8.36132	9.276957567282272	30 min
86.67941	9.0336	10.421852202270411	30 min
97.48721	8.71754	8.942239705085415	30 min
83.97189	8.499939999999999	10.122363567141337	30 min
72.175	8.04	11.139591271215794	30 min
60.25898000000001	6.113180000000001	10.144844801554887	30 min
108.4406	9.21017	8.493285725088203	30 min
64.78726999999999	6.04491	9.330397777217653	30 min
79.16995	6.521730000000001	8.237633091848613	30 min
93.13982	7.7546100000000004	8.325773015236663	30 min
87.80014	8.16052	9.294427093168645	30 min
74.7426	7.316160000000001	9.788474042915286	30 min
119.34561000000001	10.458089999999999	8.762861072141655	30 min
103.46576	8.79824	8.503528123700052	30 min
120.87432	9.27897	7.67654370258298	30 min
90.19015	7.989089999999999	8.858051572150616	30 min
83.46994000000001	7.1759699999999995	8.597070993461836	30 min
91.96469	7.946969999999999	8.641327448610982	30 min
131.89083	10.984210000000001	8.328259060921827	30 min
96.72716	8.65465	8.947486931281762	30 min
87.70354	7.575089999999999	8.637154212931426	30 min
120.998	12.00755	9.923759070397857	30 min
126.09698999999999	11.38932	9.03219022119402	30 min
85.95763000000001	7.66936	8.922256232518276	30 min
80.95439	7.50177	9.266662376184911	30 min
103.30209	9.00907	8.721091702984905	30 min
128.99036	10.94233	8.483060284504981	30 min
85.21409	8.424430000000001	9.886193703412195	30 min
109.31363	10.5504	9.651495426508113	30 min
128.69297	11.766739999999999	9.14326555677439	30 min
99.91905	7.79622	7.802536153015867	30 min
79.6045	8.14074	10.226482171234037	30 min
80.95676	7.18986	8.881111348823742	30 min
144.47198	12.29475	8.510127707808808	30 min
70.49551	6.05281	8.586092929890144	30 min
63.971140000000005	5.92851	9.267475927426023	30 min
123.57353	10.88353	8.807331149316525	30 min
107.65645	9.71694	9.025878152214752	30 min
81.27678	7.12023	8.760472548248098	30 min
77.52255	7.01921	9.0544106198777	30 min
68.00899	6.5086	9.570205350792595	30 min
77.533	6.717810000000001	8.664452555685967	30 min
92.32614000000001	9.36698	10.145534081680442	30 min
107.54288999999999	8.72563	8.113627967409098	30 min
66.85457	8.18292	12.239881282610897	30 min
103.55975	9.754480000000001	9.419180714515052	30 min
81.33632	6.50621	7.999144785502958	30 min
81.73935	7.515680000000001	9.194690195114104	30 min
78.76189000000001	5.9869900000000005	7.601379296510025	30 min
84.9519	7.782489999999999	9.161054667405908	30 min
115.81236000000001	10.15817	8.77123132625913	30 min
96.88888	8.5643	8.839301269660666	30 min
84.31426	7.52435	8.924172494664603	30 min
84.90275	7.469119999999999	8.797265106253919	30 min
84.24193000000001	7.94488	9.431027992829698	30 min
126.41532	10.31012	8.155752008538206	30 min
91.11225	8.88733	9.75426465705764	30 min
89.5401	7.98782	8.920941566962735	30 min
74.29885999999999	8.58722	11.557673967002994	30 min
83.17499000000001	7.2140699999999995	8.673364433226862	30 min
74.10875	7.03745	9.49611213250797	30 min
82.5009	7.32218	8.875272875811053	30 min
128.9236	11.41273	8.852320288915296	30 min
88.7368	8.77667	9.890676697829987	30 min
127.78995	10.34212	8.093062091345992	30 min
88.0431	8.314910000000001	9.444135883447995	30 min
77.2352	6.42925	8.324248529168047	30 min
70.2735	5.84656	8.319722228151436	30 min
67.18970999999999	5.86239	8.72513067849229	30 min
59.12405	6.27217	10.60849180663368	30 min
108.86445	8.02507	7.371616721528469	30 min
108.75783999999999	7.68732	7.068290433131075	30 min
134.10603999999998	9.719560000000001	7.247667592004061	30 min
161.33989	11.52426	7.142846074829976	30 min
80.6833	5.9943599999999995	7.429492844244099	30 min
124.39213000000001	9.4372	7.586653592956403	30 min
72.8706	6.74783	9.260017071356625	30 min
82.87393	7.203180000000001	8.691732128547542	30 min
109.56336999999999	7.4358699999999995	6.786821179377743	30 min
160.64049	10.63412	6.619825425084298	30 min
78.71602	5.5788400000000005	7.087299383276746	30 min
85.57768	6.14616	7.1819661388343325	30 min
75.36295	5.4360599999999994	7.213173051214157	30 min
90.92933000000001	6.61769	7.277838734762479	30 min
158.57603999999998	10.79703	6.808739832322715	30 min
136.72263999999998	10.54882	7.715488817360461	30 min
114.58273	8.126610000000001	7.092351526272765	30 min
102.34865	7.75245	7.57455032381961	30 min
78.48169	5.88837	7.50285831000836	30 min
128.76712	9.51154	7.386621677956298	30 min
75.58842	5.54746	7.339034206562328	30 min
101.35785	7.477	7.376833664092125	30 min
72.45351	5.50031	7.591502468272414	30 min
77.68089	7.6608	9.861884950082317	30 min
102.86318	8.25809	8.028227398764066	30 min
106.80076000000001	8.151689999999999	7.632614224842593	30 min
124.16434	9.204989999999999	7.413553682160272	30 min
141.61473999999998	10.68718	7.546657925580346	30 min
87.06591	6.91534	7.942649425016059	30 min
82.49461	6.46937	7.842172961360748	30 min
110.42062	8.61684	7.803651165878257	30 min
99.8144	7.61716	7.631323736855604	30 min
127.94198999999999	9.729239999999999	7.6044150946847076	30 min
147.58511000000001	9.74766	6.604771985466555	30 min
106.40903	7.960560000000001	7.481094414637555	30 min
78.14707	5.99715	7.674184073695918	30 min
87.78652	7.050089999999999	8.030948259482207	30 min
100.52008000000001	8.31987	8.276823894290573	30 min
70.70445	5.9423699999999995	8.404520507549384	30 min
71.72873	5.60195	7.80991103564778	30 min
74.36327	6.657439999999999	8.952591783551208	30 min
100.66848	7.58078	7.53044051127026	30 min
117.08273	8.60668	7.350938947187173	30 min
108.90409	8.21643	7.544647772181927	30 min
59.94166	5.54024	9.242720338409047	30 min
88.39386999999999	5.7265	6.478390413271871	30 min
87.75239	6.32629	7.209250938920296	30 min
100.28844000000001	7.2192	7.198436828810976	30 min
73.02411	6.141830000000001	8.410687922112302	30 min
128.41038999999998	9.073210000000001	7.065791171571088	30 min
86.25239	5.62829	6.525372804162295	30 min
92.97766999999999	7.53797	8.107290707543005	30 min
99.42509	6.87182	6.911555222127533	30 min
95.53192	7.13535	7.469074211007169	30 min
91.04302	6.59045	7.238830609968781	30 min
103.38486999999999	7.638139999999999	7.388063649932529	30 min
81.288	5.8321	7.174613719122133	30 min
81.08436	6.20887	7.6572966722559075	30 min
103.71880999999999	8.51768	8.212280877499463	30 min
91.36918	7.09846	7.768987310600796	30 min
96.81956	8.32938	8.602993031573373	30 min
152.21426	10.5267	6.915712102138132	30 min
91.85591	7.539969999999999	8.208475644082128	30 min
112.46332	7.47518	6.646771587394006	30 min
130.97768	9.76446	7.455056464582363	30 min
128.59072	9.29428	7.227799953215909	30 min
114.4308	9.18555	8.02716576306379	30 min
113.50003000000001	8.0644	7.105196359859992	30 min
123.96231	9.03824	7.291119373299836	30 min
93.5502	6.659739999999999	7.118894454528156	30 min
91.46186999999999	7.17143	7.840895883716352	30 min
107.4407	9.857380000000001	9.174716843803141	30 min
73.74011999999999	5.37271	7.286006586373876	30 min
68.40556	5.5553300000000005	8.12116734370715	30 min
104.2761	8.19696	7.860823333438824	30 min
96.35209	7.95392	8.255057051694466	30 min
107.37552	7.9143	7.370674433055132	30 min
139.95626000000001	8.73035	6.237913188020314	30 min
84.31004	6.733560000000001	7.986664458942257	30 min
77.02967	6.14826	7.981677709381334	30 min
73.00304	5.66901	7.765443740425057	30 min
96.21451	7.67897	7.981093496188879	30 min
141.35529	10.71686	7.581506146674808	30 min
124.32213999999999	10.07194	8.101485383054056	30 min
126.2535	9.38984	7.437290847382448	30 min
94.09767	7.637389999999999	8.11644964216436	30 min
95.05666	6.83595	7.19144771129135	30 min
90.42298000000001	6.84925	7.574678472220224	30 min
96.64259	6.93808	7.179112231987989	30 min
81.80704	6.29812	7.698750620973452	30 min
97.98048	7.22761	7.376581539506645	30 min
95.63409	6.40613	6.6985841555035455	30 min
80.9519	6.61795	8.175163275970053	30 min
118.09608	8.27973	7.011011711819733	30 min
64.12236999999999	8.28111	12.914541368324347	30 min
92.30089	6.797680000000001	7.364696050059756	30 min
106.75063999999999	7.0019	6.55911758468146	30 min
83.38447	6.29305	7.547028841221873	30 min
77.027	5.53831	7.190089189504979	30 min
77.81277	6.24455	8.025096651873467	30 min
106.57281	8.121369999999999	7.620489691507617	30 min
77.80014	6.4815	8.330961872305114	30 min
116.36939	8.06725	6.932450191583886	30 min
121.40601000000001	8.95916	7.3795028763403065	30 min
84.03881	5.67659	6.754724394598163	30 min
87.13785	6.708760000000001	7.6990194272638135	30 min
93.85616	7.47284	7.962013361722874	30 min
112.89113	9.1664	8.119681324830392	30 min
77.80635	6.30359	8.101639519139505	30 min
79.01616	6.30753	7.982582297089608	30 min
94.01924	7.4935	7.970177167992425	30 min
89.7232	7.0018	7.80377873281381	30 min
74.26957	6.29066	8.470036920908521	30 min
97.35325999999999	7.8231399999999995	8.03582745970705	30 min
76.18458000000001	6.06419	7.959865369081248	30 min
79.27847	5.88851	7.427628207254757	30 min
70.8116	6.4038699999999995	9.043532415592924	30 min
103.23527	7.7941899999999995	7.549929399128804	30 min
123.31878999999999	8.23824	6.680441804529545	30 min
108.89804	8.67267	7.964027635391785	30 min
146.70058999999998	11.198839999999999	7.633807062398318	30 min
108.73666999999999	8.13037	7.477118804539444	30 min
99.33089	7.64222	7.69369931146293	30 min
74.0565	6.61307	8.929763086292223	30 min
104.50944	5.98979	5.73133871925828	30 min
69.60427	5.0931	7.3172234979262045	30 min
102.74494	8.03329	7.818672140934628	30 min
94.55252	6.91586	7.314305319414014	30 min
97.16108	7.891369999999999	8.121945536216764	30 min
102.33894000000001	8.51187	8.317332581322418	30 min
104.64013	8.65536	8.271549356828972	30 min
112.12695	7.96318	7.10193222949523	30 min
140.79201	10.67951	7.5853097061402845	30 min
110.02982	9.01147	8.190025213164938	30 min
75.42644	5.46054	7.239556845053273	30 min
76.84023	6.20959	8.081170501441758	30 min
117.31941	8.64424	7.368124336799853	30 min
94.47426999999999	6.5059	6.886425266900713	30 min
85.32292	5.88171	6.893470125026195	30 min
76.44199	5.703130000000001	7.460729371383451	30 min
77.17891	6.02649	7.808467364983517	30 min
85.77735	5.55896	6.480685169220079	30 min
85.12849	5.5267800000000005	6.492280081556716	30 min
80.92125	5.8209599999999995	7.193363918624588	30 min
123.81613	9.68768	7.824247131613628	30 min
109.12491000000001	7.6801	7.037898129767071	30 min
97.14376999999999	7.885910000000001	8.117772246228453	30 min
94.68992	7.74578	8.180152649827987	30 min
104.24888	7.25518	6.9594800442940015	30 min
86.49368	6.05751	7.003413428588077	30 min
118.15633999999999	8.34233	7.060416732610371	30 min
74.01475	5.42879	7.334740710466495	30 min
89.24323000000001	6.19843	6.945546457697686	30 min
80.6433	5.35337	6.638332012702854	30 min
80.01635999999999	6.01242	7.513988389374374	30 min
79.9595	6.13819	7.676623790794089	30 min
68.35249	5.3451699999999995	7.820007727589733	30 min
86.63431	6.28696	7.25689394882928	30 min
66.07676	4.9050199999999995	7.423215060786879	30 min
62.99041	5.08915	8.0792457137523	30 min
93.25225	6.34868	6.808071655107517	30 min
92.36721999999999	6.7301899999999995	7.286340327228642	30 min
108.46571999999999	6.8741	6.337578361163325	30 min
57.044959999999996	6.72138	11.782600951950883	30 min
97.43712	7.289560000000001	7.481296655730383	30 min
92.18804	6.32148	6.857158477390343	30 min
117.0447	9.7413	8.322717730918187	30 min
92.78402	7.54745	8.13442875184757	30 min
113.90423999999999	8.84544	7.7656810668329825	30 min
89.54574000000001	7.20655	8.047898202639232	30 min
95.61803	7.31774	7.653096387783767	30 min
83.28568	6.889819999999999	8.272514554722973	30 min
72.80904	4.67347	6.41880458800171	30 min
67.50166999999999	4.68806	6.945102247099961	30 min
69.48453	5.93763	8.545254605593504	30 min
77.46821	5.61035	7.242131966131657	30 min
68.84693	5.25146	7.62773300131175	30 min
88.9689	7.14151	8.026973470504862	30 min
108.83336000000001	8.41035	7.727731644047376	30 min
101.17548000000001	8.06451	7.970814667743607	30 min
102.27348	7.266589999999999	7.105057928995863	30 min
110.33798	10.7265	9.721493904456107	30 min
100.72698000000001	7.32605	7.27317546897564	30 min
137.68133999999998	10.75109	7.808676179357349	30 min
112.50388999999998	8.743780000000001	7.771980151086333	30 min
105.94452	7.5815600000000005	7.156160601794223	30 min
107.59476000000001	8.19445	7.6160307435046075	30 min
119.12319	8.55897	7.184973807366979	30 min
84.36111	7.150510000000001	8.476073868634494	30 min
100.26224	6.8491100000000005	6.83119587194541	30 min
80.32372	5.8743099999999995	7.31329425479796	30 min
82.1132	5.93331	7.225768816706692	30 min
91.41341	6.14034	6.717110760882895	30 min
73.59605	5.72494	7.778868566995103	30 min
87.10722	5.630719999999999	6.464125476625243	30 min
107.11549	6.4796	6.049171786452174	30 min
93.37051	7.390789999999999	7.915550637990516	30 min
73.83603000000001	5.35945	7.258583648118674	30 min
74.81062	6.8605100000000006	9.170502797597454	30 min
91.03633	6.9474800000000005	7.631546658350572	30 min
115.64108	7.6162	6.586067857546817	30 min
75.69465	5.2691099999999995	6.961007151760396	30 min
78.78796	5.6596400000000004	7.183381826360272	30 min
93.05807	9.22667	9.914959551600415	30 min
110.21856000000001	9.79008	8.882424157963957	30 min
125.59316000000001	9.76778	7.777318446323031	30 min
76.07524000000001	7.70872	10.133020940847507	30 min
119.9404	9.950569999999999	8.296262143531287	30 min
71.39468000000001	6.64686	9.310021418962869	30 min
75.86646999999999	6.29903	8.302785143423703	30 min
94.72555	6.82114	7.200950535520775	30 min
78.46625	7.36393	9.3848374301053	30 min
110.01733	8.11567	7.376719649531578	30 min
83.85249	8.09732	9.656624388852377	30 min
66.39093000000001	5.60332	8.439887797926612	30 min
73.6307	5.683	7.7182479590714195	30 min
139.38743	11.7374	8.420701924126156	30 min
141.52102	11.53381	8.14989179699242	30 min
114.43268	10.08302	8.81131159385588	30 min
101.10695	8.46906	8.376338125123942	30 min
76.20461999999999	8.00047	10.498667928532418	30 min
99.72503	8.17037	8.192898011662669	30 min
105.77765	8.12298	7.679297091587873	30 min
93.04406	8.78807	9.445062908905737	30 min
80.79213	7.3101199999999995	9.048059507776314	30 min
102.02994	8.67755	8.50490552086966	30 min
141.20448000000002	12.69313	8.989183629301278	30 min
97.25621	8.115969999999999	8.344937562341777	30 min
111.75478000000001	9.32727	8.34619333508598	30 min
111.35407	10.39987	9.339461054274892	30 min
118.98601000000001	10.17972	8.555392352428658	30 min
129.5194	12.214960000000001	9.430988716748226	30 min
88.22796	8.22707	9.324787743023867	30 min
97.14889000000001	8.06902	8.305828301280641	30 min
90.4881	7.62657	8.428257417273652	30 min
90.91704	8.27942	9.10656572189328	30 min
128.71624	10.92545	8.48801207990538	30 min
115.26404	10.32155	8.954700876353112	30 min
68.90337	5.85366	8.495462558652791	30 min
68.56531	5.96074	8.693521549016552	30 min
104.69559	8.72986	8.338326380318408	30 min
79.98751	7.55242	9.441999132114502	30 min
125.98265	9.63993	7.651791734814277	30 min
102.84693	9.07967	8.82833352439397	30 min
115.4372	9.42933	8.16836340451778	30 min
100.75873	8.30611	8.24356360982319	30 min
136.35494	10.92078	8.009082765904925	30 min
85.29714	7.4882	8.778957887685332	30 min
99.65146	9.16607	9.198129159372074	30 min
111.77606000000002	9.592210000000001	8.58163188074441	30 min
117.78465	10.05472	8.536528316720387	30 min
115.02736000000002	10.06783	8.752552436220391	30 min
75.67881	7.33352	9.690321504791104	30 min
84.70461	7.322989999999999	8.645326387784559	30 min
86.43748000000001	7.415660000000001	8.579218181742457	30 min
92.60840999999999	7.484939999999999	8.082354507544185	30 min
107.56402	8.713239999999999	8.100515395389648	30 min
103.6101	8.6259	8.325346660219418	30 min
102.47653000000001	9.001539999999999	8.784001566017114	30 min
60.55651999999999	5.555280000000001	9.173710774661426	30 min
71.9648	5.7054599999999995	7.928125972697762	30 min
126.68297	11.20363	8.843832758262614	30 min
117.27592	9.52615	8.122852500325726	30 min
70.7981	7.066139999999999	9.980691572231457	30 min
82.10246	7.121519999999999	8.673942291132324	30 min
71.10299	6.45296	9.075511451768763	30 min
78.24116	6.40733	8.189206294998694	30 min
137.18237	12.041730000000001	8.777899084262797	30 min
69.56149	5.85392	8.415460910914932	30 min
93.54524	8.13555	8.696914990009113	30 min
103.94445999999999	10.38368	9.989642545644088	30 min
82.03486	7.72739	9.419641844942504	30 min
72.56512	6.21986	8.571418334318198	30 min
125.48348999999999	10.02438	7.98860471604671	30 min
91.36305	8.1671	8.939171798664777	30 min
109.44377	8.51416	7.779483473568208	30 min
113.59913999999999	10.3017	9.068466539447396	30 min
104.0013	9.64069	9.26977835853975	30 min
90.99224	7.99194	8.783100624844492	30 min
100.46865	8.20052	8.162267533205632	30 min
139.24105	11.96824	8.595338802745312	30 min
123.01462	10.97204	8.91929755991605	30 min
77.11248	7.2558	9.409371868211215	30 min
83.61748	7.45643	8.917310112670222	30 min
91.1968	7.37585	8.087838608372223	30 min
81.63880999999999	7.570939999999999	9.273702054206817	30 min
103.78891999999999	9.60064	9.250158880157922	30 min
114.50665	9.33478	8.152172821403823	30 min
127.6643	11.55477	9.050901465797407	30 min
113.36385	10.21606	9.011744043625901	30 min
123.86138000000001	10.59993	8.557897546434571	30 min
89.46956999999999	7.76974	8.684226379985956	30 min
134.5273	12.14592	9.028591222748098	30 min
93.50962	8.00027	8.555558240959595	30 min
114.13394	9.9199	8.691454969485852	60 min
127.01069	12.0024	9.449913231713015	60 min
76.98911	7.3735	9.577328533866673	60 min
66.7771	7.461139999999999	11.173201591563574	60 min
76.31206	7.487889999999999	9.812197442972971	60 min
81.65255	7.91202	9.689862717085994	60 min
68.76527	7.10268	10.328876771661044	60 min
99.10306	9.63043	9.717590960359852	60 min
101.30841	9.20745	9.088534703091284	60 min
96.18144000000001	8.33169	8.662471678527583	60 min
93.11567	8.70502	9.348609100917171	60 min
92.70445	8.906989999999999	9.607942229310458	60 min
140.79905	12.950569999999999	9.19791007112619	60 min
110.86353999999999	11.673210000000001	10.529349865609563	60 min
65.66445	6.52842	9.942091953865447	60 min
72.08319	6.79121	9.421350525691219	60 min
159.45056	14.81664	9.292309791825128	60 min
65.18551	7.66104	11.752673255145202	60 min
60.1095	7.19223	11.965213485389166	60 min
56.926719999999996	5.46331	9.597092542834016	60 min
76.27531	7.455189999999999	9.774054015644117	60 min
76.71866	8.23355	10.732134789632665	60 min
74.4658	7.19062	9.656271738167051	60 min
76.14771999999999	7.285939999999999	9.568165665367262	60 min
61.38072	6.44615	10.501913304373101	60 min
127.59364	11.72777	9.191500454097868	60 min
75.79445	7.471139999999999	9.8571069517623	60 min
76.29424	7.93354	10.398609383880093	60 min
52.936719999999994	5.67375	10.717985549539149	60 min
68.72493	6.52525	9.494735025557683	60 min
68.5845	5.6518	8.240637461817172	60 min
62.71399	7.06038	11.258062196329718	60 min
82.3	7.0291	8.5408262454435	60 min
88.45201	8.16474	9.230700353785064	60 min
86.21663000000001	7.856739999999999	9.112789493163904	60 min
107.9667	9.41169	8.717215585916769	60 min
89.27467	8.231119999999999	9.21999487648624	60 min
101.86932	9.30797	9.137167107820096	60 min
89.81045999999999	9.29866	10.35364922972224	60 min
93.01638	8.49558	9.133423597005173	60 min
82.47604	9.42719	11.430216581688452	60 min
82.42128000000001	8.523530000000001	10.34141910923975	60 min
72.70596	6.826969999999999	9.389835441276064	60 min
66.70254	7.39275	11.083161150984656	60 min
115.53836000000001	11.46986	9.927317645845068	60 min
94.39378	9.046669999999999	9.583968350456988	60 min
92.86742	9.486469999999999	10.215067889255456	60 min
111.21323000000001	10.42885	9.377346562095175	60 min
105.15281	9.94702	9.459585530809877	60 min
134.61716	13.37718	9.937202656778673	60 min
98.67794	9.61483	9.743646857646196	60 min
109.09208000000001	9.91892	9.092245743229022	60 min
101.78792	9.7988	9.626682616168992	60 min
97.77874	8.326789999999999	8.515951422568953	60 min
109.72022	9.66191	8.80595208431044	60 min
102.62297	8.91018	8.682442147211294	60 min
113.59661000000001	11.23944	9.894168496753556	60 min
112.0088	10.41962	9.302501232046053	60 min
132.82871	11.45692	8.625334086283003	60 min
75.37886999999999	7.44435	9.875910848756424	60 min
75.43216	7.2754	9.644957800492524	60 min
114.18547	9.429860000000001	8.258371227092205	60 min
85.0739	9.0743	10.666373588139253	60 min
100.97672	9.173680000000001	9.084945520115925	60 min
77.71454	8.34122	10.73315238049405	60 min
78.85427	7.9371100000000006	10.065542424018382	60 min
88.3858	8.17993	9.254801110585637	60 min
68.67093	7.98135	11.622603625726345	60 min
105.60463999999999	9.99207	9.461771755483472	60 min
72.37413000000001	8.01875	11.07958050756534	60 min
78.53217	8.38648	10.679037647883666	60 min
84.86869	5.86519	6.91089964980018	60 min
68.10882	7.54052	11.07128269143409	60 min
76.93217	7.10912	9.240763649329013	60 min
93.85673	9.02755	9.618436525542707	60 min
105.71811000000001	11.18847	10.583304979629316	60 min
100.43139000000001	10.33715	10.292748113911395	60 min
107.09805	10.0361	9.37094559611496	60 min
98.43274	9.03576	9.179628647947826	60 min
94.27159	9.92573	10.52886665006923	60 min
98.62204	9.71797	9.853750743748558	60 min
89.2193	8.436960000000001	9.456429270348456	60 min
85.75576	8.15296	9.507186456046801	60 min
86.20988	8.05954	9.348742858707146	60 min
77.01137	7.330030000000001	9.518114013554104	60 min
90.07688	8.86054	9.836641766455498	60 min
93.77736999999999	8.600769999999999	9.171477084503437	60 min
77.53724	7.15411	9.226676110730793	60 min
93.87995	8.68897	9.255405440671836	60 min
87.81090999999999	8.5778	9.768490042979854	60 min
75.69771	7.52985	9.947262605434167	60 min
74.35432	7.264539999999999	9.77016533807316	60 min
137.63305	10.69234	7.768729967111823	60 min
79.40438	7.22815	9.102961322788492	60 min
76.87573	7.05629	9.178826659597247	60 min
75.0899	7.62225	10.1508325354009	60 min
71.23821	7.2184800000000005	10.132876724443246	60 min
119.03745	11.69626	9.825697711098481	60 min
114.70713	10.6888	9.318339670777222	60 min
150.64059	13.227170000000001	8.780614839599341	60 min
137.50851	13.10956	9.533635409183038	60 min
72.10562	7.20552	9.993007479860792	60 min
127.57191999999999	11.372860000000001	8.91486151497916	60 min
70.47339000000001	7.12482	10.109943625530144	60 min
62.17566	5.81275	9.348915636762039	60 min
66.36366	7.2436	10.915009811092396	60 min
108.95213999999999	9.53725	8.753614201611828	60 min
112.95221000000001	8.85187	7.836827628250921	60 min
75.07598	7.36563	9.810900903324873	60 min
69.71583000000001	6.944210000000001	9.960736320574538	60 min
84.74023000000001	7.71564	9.10504963227029	60 min
68.27176	7.3694	10.794214181676288	60 min
94.39256999999999	7.997560000000001	8.472658388260857	60 min
73.64791	7.40809	10.058791892397217	60 min
77.32252	7.19125	9.300330615194643	60 min
71.91445999999999	7.618989999999999	10.594517430847706	60 min
58.89382	6.734610000000001	11.43517265478789	60 min
89.71324	8.26216	9.209521359389093	60 min
74.27986999999999	8.77008	11.806805800817909	60 min
104.45425999999999	8.5531	8.188368765429004	60 min
73.34315	7.36485	10.041633063210401	60 min
63.67351	5.83589	9.165334218264393	60 min
83.419	7.5887	9.09708819333725	60 min
98.26718000000001	8.36916	8.516739770083968	60 min
61.79048	7.79513	12.615422311009722	60 min
103.86505	9.93332	9.563679023887246	60 min
66.29411	7.96714	12.01787006417312	60 min
135.29238999999998	12.61553	9.324641245527559	60 min
71.88035	7.371169999999999	10.254777557427028	60 min
73.73743	7.56037	10.253096697294712	60 min
73.96021999999999	8.29003	11.208768713776136	60 min
97.33165	10.33714	10.620532992094557	60 min
92.07672	8.1948	8.899969503692141	60 min
87.23335	8.126660000000001	9.31600127703453	60 min
86.36065	8.050089999999999	9.321479169042844	60 min
60.37953	6.04753	10.015861335787145	60 min
63.538990000000005	6.0544199999999995	9.528668932257183	60 min
72.96746999999999	6.35865	8.714362715330545	60 min
73.61881	6.48576	8.809922355441497	60 min
110.8503	9.98125	9.004260701143794	60 min
102.88439	9.13083	8.87484486227697	60 min
105.63175	10.308530000000001	9.758931381899856	60 min
105.74666	9.995510000000001	9.452317453808943	60 min
84.68011	8.189919999999999	9.67159820647375	60 min
107.23588000000001	10.70027	9.978255412274324	60 min
110.34192	10.56826	9.577737998396257	60 min
100.71036	8.9719	8.908616750054314	60 min
108.92838	8.47175	7.777357930045412	60 min
71.29504	6.479509999999999	9.08830403910286	60 min
75.53331	7.51617	9.9508018382883	60 min
66.38908	7.78105	11.720376302849804	60 min
68.13559000000001	7.12483	10.456840543980025	60 min
97.4816	9.09812	9.333166464235301	60 min
99.87668000000001	11.02459	11.038202311090036	60 min
133.53496	11.1305	8.335270404094928	60 min
75.46751	6.894989999999999	9.136368749942854	60 min
78.38223	7.287	9.296750041431585	60 min
88.27672	7.8600699999999994	8.903899012106475	60 min
58.913740000000004	6.77302	11.496503192633838	60 min
72.21403000000001	7.12172	9.861961726827873	60 min
73.50918	7.428310000000001	10.105282088577237	60 min
71.4644	7.8819	11.029127789500787	60 min
89.52212	7.74148	8.647561072056828	60 min
57.65132	5.9273	10.28129104415996	60 min
69.85346	7.33097	10.494784367159479	60 min
88.19452	8.61813	9.771729581384422	60 min
67.63280999999999	6.1883	9.149849015588735	60 min
79.04611	7.14685	9.041368386122986	60 min
69.0005	7.031839999999999	10.190998615952058	60 min
77.46149	8.19508	10.579553788598698	60 min
82.47218000000001	7.53879	9.141009732009023	60 min
70.86407	7.3207699999999996	10.330721901804397	60 min
100.99576	9.83047	9.73354723010154	60 min
74.31621	7.859539999999999	10.575808427259679	60 min
91.4411	8.65094	9.460669217671265	60 min
86.58145999999999	7.28114	8.409583298780133	60 min
76.42228	7.626710000000001	9.979694403255177	60 min
71.37387	7.14332	10.008312565929241	60 min
127.8033	11.37995	8.9042692950808	60 min
102.6361	10.23649	9.973576548602296	60 min
89.86075	8.17249	9.094615836168739	60 min
65.73876	7.08852	10.782862347875135	60 min
70.00021	7.1454	10.207683662663298	60 min
104.58959	8.993269999999999	8.598628219118174	60 min
101.14927	10.05621	9.94195014951665	60 min
83.76091	7.86685	9.392030244179535	60 min
86.74195999999999	8.150910000000001	9.39673256172676	60 min
70.45874	6.6958	9.503150354377611	60 min
93.14511999999999	8.165460000000001	8.766385184752568	60 min
77.26501	7.7807699999999995	10.070237485247201	60 min
66.78163	6.75794	10.119459498068554	60 min
69.49338	6.28949	9.050487974538006	60 min
102.57422	9.9205	9.67153345158267	60 min
102.14043000000001	9.700460000000001	9.497179520391681	60 min
64.99206	6.46591	9.948769126567154	60 min
77.47555	8.1586	10.530548024505796	60 min
78.91043	8.432839999999999	10.686597449792124	60 min
110.71938999999999	9.02707	8.153106696126127	60 min
94.54741	8.743789999999999	9.248048148542619	60 min
103.65053	8.6886	8.38259100074066	60 min
129.64559	10.86519	8.38068614597689	60 min
149.30268999999998	12.62275	8.454469239636607	60 min
121.90083	11.08602	9.094294107759561	60 min
66.84468000000001	7.370989999999999	11.027040596200024	60 min
122.49576	9.49875	7.754350028115257	60 min
93.90302	8.54866	9.103711467426713	60 min
94.20886999999999	8.07085	8.566974638375347	60 min
100.9162	9.24649	9.162542783021953	60 min
64.32264	6.1688	9.59040238398175	60 min
72.52313000000001	7.6685	10.573867950817895	60 min
108.82428999999999	8.81905	8.10393525195524	60 min
86.27268000000001	9.18882	10.650903623255935	60 min
112.13875	9.77005	8.712465583930621	60 min
103.78457	8.52332	8.21251174427952	60 min
162.31323999999998	12.27041	7.5597098548461	60 min
124.94102	11.85977	9.49229484439938	60 min
126.21048	10.88269	8.622651621323364	60 min
124.53737	11.053139999999999	8.875360062606106	60 min
75.20111	6.59508	8.76992374181711	60 min
100.45814	7.9367600000000005	7.900564354466448	60 min
85.24632	7.70408	9.037434108592606	60 min
94.19694	11.58313	12.296715795651112	60 min
86.71096	7.420139999999999	8.557326547878146	60 min
81.21473	7.061380000000001	8.694703534691307	60 min
32.48499	6.73469	20.731697931875612	60 min
80.62423000000001	8.066230000000001	10.004721905561144	60 min
98.072	7.38201	7.527133126682438	60 min
83.80660999999999	7.964230000000001	9.503104826695651	60 min
113.5568	8.6582	7.624554408014317	60 min
76.35174	8.61081	11.277817637161904	60 min
92.02156	8.31933	9.040631347697214	60 min
101.8065	9.713189999999999	9.540834818994858	60 min
103.69484	10.00356	9.647114552662408	60 min
92.22532	8.32567	9.027531701706213	60 min
109.53563999999999	8.83332	8.064334129056078	60 min
89.15613	7.79542	8.74356031380007	60 min
89.69338	8.36173	9.322572078340675	60 min
72.65366999999999	7.31685	10.070860838826174	60 min
62.192240000000005	5.2694	8.472761231947908	60 min
91.26080999999999	8.22053	9.007732892136286	60 min
77.86407	7.44607	9.562908797343885	60 min
88.37546	10.67762	12.08210967162151	60 min
127.38763999999999	10.18718	7.996992486869213	60 min
79.04738	7.830430000000001	9.90599561933615	60 min
86.59861	7.64067	8.82308619041345	60 min
85.08394	5.68285	6.679110064719618	60 min
121.13521999999999	11.36507	9.382135104885268	60 min
120.7322	10.28096	8.515507876109272	60 min
118.13028999999999	9.67612	8.191057517932107	60 min
170.81049	12.83383	7.513490535622257	60 min
127.07988	10.73904	8.450621766403934	60 min
93.88715	10.80633	11.509913763491596	60 min
108.67688999999999	9.34883	8.602408478932366	60 min
109.35226000000002	9.06808	8.29254009016366	60 min
83.22445	7.12224	8.55786971256644	60 min
72.16311	7.06031	9.78382167841713	60 min
83.55854000000001	8.26568	9.892082843955864	60 min
82.63620999999999	7.50404	9.0808133625683	60 min
96.10533000000001	8.2119	8.54468737581984	60 min
100.56351	8.142510000000001	8.096883253180007	60 min
95.88243	9.86243	10.285961672018534	60 min
93.29404	8.08971	8.671197002509485	60 min
102.07125	9.76127	9.5631923778733	60 min
141.5587	11.298969999999999	7.981826620334885	60 min
104.33335	10.676060000000001	10.232643732804517	60 min
108.97804	10.84716	9.953528252113914	60 min
103.72565	8.65807	8.347086762049697	60 min
92.92321	8.88838	9.565295904005037	60 min
152.31311000000002	11.5265	7.56763485428142	60 min
118.46789	9.579130000000001	8.085845033620503	60 min
120.50673	9.65006	8.007901301445985	60 min
106.47131	8.3982	7.887758683536437	60 min
110.02866999999999	9.8809	8.980295772001972	60 min
100.15793000000001	9.05844	9.0441565635392	60 min
71.11721999999999	5.5638	7.823421669182233	60 min
108.40587	7.56244	6.976042902473824	60 min
93.26222	7.969930000000001	8.545721943998332	60 min
88.00089	7.479	8.498777682816618	60 min
70.21945	5.73846	8.172180215025895	60 min
86.47247	6.992839999999999	8.086781839353034	60 min
109.16773	8.69248	7.962499540844166	60 min
123.50984	8.72245	7.062149865954001	60 min
94.29616999999999	7.5567899999999995	8.013888581052656	60 min
93.98036	7.02371	7.473593418880285	60 min
49.8001	6.1406	12.330497328318618	60 min
95.95976	6.93728	7.229363641593101	60 min
65.83339000000001	7.98557	12.129969305849203	60 min
86.26191	7.60407	8.815095793728657	60 min
70.81721999999999	7.74194	10.932284548871024	60 min
76.16494	5.565840000000001	7.3076142382571305	60 min
68.04853	6.39041	9.390959657761895	60 min
77.80306	5.62915	7.235126741801672	60 min
74.84192	6.979239999999999	9.325308597107075	60 min
92.46016999999999	7.46099	8.069409779367701	60 min
128.11652	10.48038	8.1803501999586	60 min
93.96729	6.69228	7.1219250869105615	60 min
126.25098999999999	9.39071	7.438127811908644	60 min
47.973859999999995	5.7952	12.079911851996068	60 min
83.262	6.4776	7.779779491244505	60 min
75.24401	6.00635	7.982495882396486	60 min
81.25241	5.98862	7.370390613644568	60 min
141.10315	11.01109	7.803574902473828	60 min
81.69174	6.01645	7.364820482462486	60 min
65.50394	5.2352300000000005	7.992236802854913	60 min
93.70997	7.38115	7.876589865518045	60 min
79.15928000000001	5.86463	7.408644949777207	60 min
81.20116	5.47766	6.745790331074088	60 min
80.64194	5.93248	7.356569050794165	60 min
146.7128	11.56447	7.882386540233709	60 min
124.34378000000001	9.49467	7.6358222341318545	60 min
118.3391	9.79473	8.2768332698153	60 min
124.39163	9.834	7.905676611842774	60 min
107.48043999999999	8.894630000000001	8.275580189288398	60 min
71.15706999999999	6.60854	9.2872570497914	60 min
81.44457	8.82572	10.83647442671746	60 min
144.70154	10.28995	7.111154449358313	60 min
82.24117	4.61541	5.6120432138793745	60 min
99.76614000000001	7.227180000000001	7.244121101608221	60 min
143.15413999999998	10.492	7.329162817086535	60 min
118.66858	8.75618	7.37868439986389	60 min
75.63434000000001	5.0351099999999995	6.657174505654441	60 min
63.06154	5.52344	8.758809252041736	60 min
66.57648	5.5428	8.325462685921515	60 min
82.96703000000001	6.3600699999999994	7.665780009239813	60 min
121.96968999999999	8.399519999999999	6.886563374884366	60 min
121.5151	9.41522	7.7481893196812575	60 min
153.75253999999998	12.44769	8.095924789275026	60 min
134.90373	11.90568	8.82531565287335	60 min
112.5921	8.6	7.638191311823831	60 min
115.85342	9.14621	7.894639623068529	60 min
116.27718	9.36028	8.0499716281389	60 min
95.41853	7.310339999999999	7.661342089424348	60 min
149.75843999999998	9.87485	6.593852072711229	60 min
113.15387	8.75259	7.735122095249593	60 min
113.08268999999999	9.058489999999999	8.010500988259123	60 min
106.40534	7.91148	7.435228344742849	60 min
71.37356	7.32418	10.261755193379733	60 min
119.76875	9.18079	7.66543025622293	60 min
73.88733	3.57186	4.834198231279977	60 min
77.40727	5.244759999999999	6.775539300120001	60 min
83.05431	6.7336100000000005	8.107478106795421	60 min
122.96351000000001	10.87226	8.841858857152012	60 min
108.62244	8.48888	7.815033431397785	60 min
120.8272	9.7638	8.080796376974721	60 min
82.93599	7.343030000000001	8.853852229894404	60 min
103.83055999999999	7.884189999999999	7.59332319887324	60 min
92.48425999999999	8.16342	8.826820909849959	60 min
111.15546	7.743469999999999	6.966342454072881	60 min
106.50537	8.19722	7.69653210913215	60 min
96.11799	7.74459	8.057378228570947	60 min
123.15122	10.50362	8.529042586829428	60 min
116.63162	8.97096	7.691704873858393	60 min
165.36355	10.29913	6.228174225819414	60 min
114.99219	8.99447	7.8218094637557565	60 min
83.03967	6.9809399999999995	8.406753061518668	60 min
95.01467	7.1602	7.535888931677603	60 min
93.19466	7.081460000000001	7.598568415829835	60 min
123.71582	9.31147	7.526499036259065	60 min
153.35716000000002	10.421339999999999	6.795470129989364	60 min
80.90077	5.66648	7.004234941150746	60 min
69.86554	5.87769	8.41285990203468	60 min
79.85103000000001	6.91091	8.654753733295612	60 min
62.55978	6.4105	10.246998950443878	60 min
68.50457	5.2144	7.611754952990728	60 min
81.27882	7.979139999999999	9.816997835352433	60 min
81.49266	7.858460000000001	9.643150683754833	60 min
77.6743	6.75616	8.698063580875528	60 min
94.77138000000001	7.4511199999999995	7.862204813309671	60 min
87.05048000000001	8.11016	9.316617208773575	60 min
116.57445	9.01872	7.736446536955569	60 min
102.9207	10.46392	10.166973213357469	60 min
76.9435	7.165	9.312027656657158	60 min
67.85722	4.62071	6.809459627140635	60 min
67.08575	7.7795	11.596352429539804	60 min
90.48898	6.45754	7.136272284205216	60 min
63.68085	7.121639999999999	11.183330624512704	60 min
77.57093	6.83073	8.80578587880795	60 min
143.26067	12.308060000000001	8.591374031686435	60 min
72.47721	6.58701	9.088387922217205	60 min
89.75907	9.41975	10.494482618859577	60 min
95.80848	10.07429	10.515029567320136	60 min
79.83648000000001	6.77205	8.482400526676525	60 min
89.0532	9.177489999999999	10.305626299784846	60 min
73.13219000000001	4.72601	6.462284255401074	60 min
79.52617	7.03733	8.849074461903546	60 min
108.36072	9.17884	8.470634008338077	60 min
130.08141	12.73537	9.790307469760668	60 min
86.49701	8.89045	10.278332164314117	60 min
103.4604	9.047830000000001	8.745210727969349	60 min
112.97223999999999	9.97285	8.827699618950637	60 min
90.9593	8.87895	9.761453749094375	60 min
86.07675	7.762060000000001	9.017603475967668	60 min
78.89018	7.09582	8.994554201803064	60 min
75.03311	8.17662	10.897349183580422	60 min
97.55372	9.53116	9.77016560721621	60 min
74.40292	8.374830000000001	11.256050165773065	60 min
107.57383	7.91895	7.361409368802803	60 min
108.94988000000001	8.977139999999999	8.239697005632312	60 min
94.89196	11.151110000000001	11.751374932080653	60 min
119.11503	10.10105	8.480080137661888	60 min
132.05674	11.12002	8.420637977281585	60 min
100.51343	9.1486	9.101868277701795	60 min
93.11952	8.772780000000001	9.420989283449916	60 min
94.68684	5.4381900000000005	5.743343003103705	60 min
128.25836999999999	11.35777	8.855383083380836	60 min
79.15003	7.13822	9.018594181202458	60 min
108.85156	10.1834	9.355309193547615	60 min
91.4459	8.03403	8.785555175245692	60 min
142.33004	11.10132	7.7997027191167785	60 min
114.25665	11.467989999999999	10.037043795700292	60 min
94.65803000000001	10.18677	10.761654346704656	60 min
136.79898	13.02998	9.524910200353833	60 min
156.98252	13.63463	8.685444723399776	60 min
116.1078	9.085289999999999	7.824874814611937	60 min
79.90116	7.538069999999999	9.434243507853953	60 min
106.47306	10.84315	10.183937608255082	60 min
99.80335	8.43843	8.455056869333545	60 min
73.97146	7.77555	10.51155405071091	60 min
69.58819	6.41161	9.213646740919687	60 min
96.68434	12.06922	12.483117741714944	60 min
93.79481	8.14901	8.688124641438051	60 min
75.1073	9.52921	12.687461804644823	60 min
103.90659000000001	8.08199	7.778130338027644	60 min
92.77673	8.47825	9.138336735946611	60 min
99.17088000000001	8.39377	8.463946271324808	60 min
77.24797	6.588439999999999	8.528949045521843	60 min
68.23239000000001	7.69924	11.283849210030601	60 min
76.0155	7.22893	9.509810499174511	60 min
108.86116000000001	8.82938	8.110679695127262	60 min
77.90541999999999	6.48477	8.323900955799996	60 min
76.61171999999999	7.83172	10.222613459141762	60 min
61.20636999999999	5.74643	9.388614289656454	60 min
70.00397	7.97815	11.396710786545393	60 min
102.03860999999999	10.25844	10.053488576530002	60 min
148.62968999999998	12.71635	8.555726651922642	60 min
102.24213	7.71427	7.545099070216945	60 min
84.68718	7.859960000000001	9.281168649139103	60 min
131.82426999999998	12.16738	9.229999908211136	60 min
143.5984	12.53158	8.72682425430924	60 min
86.33373	10.31445	11.947184489770105	60 min
75.17545	4.767530000000001	6.341870916635685	60 min
99.32333	9.19762	9.260281547145068	60 min
69.77323	10.01271	14.350360446262844	60 min
84.37579000000001	8.37674	9.927895193633148	60 min
111.17868	10.50232	9.446343489597107	60 min
98.40595	9.4557	9.60887019534896	60 min
69.80341999999999	6.59662	9.450281948936027	60 min
94.3435	8.50833	9.018459141329291	60 min
105.3284	7.32833	6.957601178789387	60 min
39.01095	5.91101	15.15218163105487	60 min
97.77725	10.71957	10.963255767573745	60 min
79.49228000000001	8.313310000000001	10.458009255741564	60 min
66.37056	5.65803	8.524909236866467	60 min
81.48394	6.796360000000001	8.340735609986458	60 min
97.05915999999999	8.68801	8.951251999296101	60 min
84.02920999999999	7.8103	9.294744053883168	60 min
106.83616	9.50793	8.899543001171137	60 min
98.20725999999999	9.304219999999999	9.474065359322722	60 min
106.81568999999999	8.4926	7.950704620266929	60 min
74.04723	7.26536	9.811791744269165	60 min
100.61334000000001	9.0006	8.945732245843343	60 min
159.06568000000001	13.0818	8.22414992347815	60 min
91.60025	7.91752	8.64355719553167	60 min
70.78548	7.43082	10.497661384792472	60 min
91.61768000000001	8.0981	8.839014478428181	60 min
120.50492	10.78762	8.952016233030154	60 min
83.48561	7.62062	9.12806410589801	60 min
106.40816000000001	8.50424	7.992093839419832	60 min
110.26427	10.19121	9.242531601578644	60 min
94.00097	8.69197	9.24668117786444	60 min
88.93551	8.205919999999999	9.22682064790543	60 min
91.7892	7.245369999999999	7.893488558566802	60 min
92.36274	8.65873	9.374700230850666	60 min
102.10924	8.26776	8.096975356980426	60 min
83.48257	7.2691300000000005	8.707362506928094	60 min
102.2296	8.850480000000001	8.657453418579356	60 min
94.43196999999999	7.52018	7.963595379827404	60 min
91.07451999999999	7.9993300000000005	8.783279889918719	60 min
123.61743999999999	9.52435	7.704697654311561	60 min
116.00361000000001	10.48776	9.040891055028373	60 min
71.9321	9.14899	12.718925208634252	60 min
73.89809	5.677309999999999	7.682620755150775	60 min
134.74896	9.72509	7.217191138247003	60 min
100.07583000000001	7.66944	7.663628670379251	60 min
113.58952	9.54627	8.404182005523046	60 min
83.2642	6.28673	7.550339761866446	60 min
82.84963	8.98185	10.841146786050823	60 min
108.90036	8.13844	7.473290262768644	60 min
126.1343	9.503910000000001	7.534754622652207	60 min
95.17664	7.538539999999999	7.920577990565751	60 min
167.26935	13.81011	8.256210716428324	90 min
116.64442	12.17809	10.44035368344238	90 min
102.90624	9.85267	9.574414535017507	90 min
101.75891	9.59486	9.429012162178232	90 min
148.60034	14.28827	9.615233720192027	90 min
134.12698999999998	11.05092	8.239147094853916	90 min
69.54066999999999	9.32267	13.406068707707306	90 min
99.1671	10.41821	10.505712075880004	90 min
91.37993	9.30867	10.186777337211792	90 min
93.77837	10.986080000000001	11.714940236218652	90 min
87.58901	9.15351	10.450523416122639	90 min
140.6131	13.50994	9.60788148472653	90 min
131.35755	10.72199	8.162446696059723	90 min
112.43002	9.96865	8.866537602679427	90 min
100.19527	10.29524	10.27517566447997	90 min
85.3299	9.53369	11.172742497061405	90 min
84.62948	8.02482	9.482298603276305	90 min
82.23794000000001	7.63868	9.288510874664418	90 min
75.80154	7.98205	10.530195032976902	90 min
72.54351	7.429760000000001	10.241798335922816	90 min
84.22355999999999	8.08692	9.6017313920238	90 min
81.41253	7.55585	9.280942380736725	90 min
158.5084	14.01203	8.839928987990541	90 min
85.43378	12.09725	14.159797213701655	90 min
103.58269	9.34646	9.023187175386157	90 min
85.04486	7.747319999999999	9.109686346711605	90 min
97.62505	8.33127	8.533946973650718	90 min
102.31275	8.08703	7.904225035491668	90 min
110.95036	10.5042	9.467477167266516	90 min
133.79573	10.75768	8.040376176429548	90 min
119.49351999999999	10.6617	8.9224085121938	90 min
87.36950999999999	7.86747	9.004823307352874	90 min
76.18064	7.44469	9.772417244066208	90 min
95.03586999999999	8.5329	8.978609865937988	90 min
84.91149	9.139	10.762972125444978	90 min
86.43143	7.721369999999999	8.933521058253923	90 min
77.21941	7.39504	9.576659547126818	90 min
132.23817	12.32017	9.31665191676503	90 min
116.46359	9.986139999999999	8.574473790478208	90 min
109.31331999999999	9.47448	8.66726945993407	90 min
112.69357	10.14353	9.000983818331427	90 min
89.39581	12.70315	14.210006039432946	90 min
88.70823	9.45357	10.656925518635644	90 min
95.72936	11.69026	12.211781213203556	90 min
91.52424	8.69785	9.503329391208275	90 min
100.0216	9.319339999999999	9.317327457269228	90 min
99.92515999999999	9.839780000000001	9.847149606765706	90 min
83.54088	7.2992	8.737279281712139	90 min
102.73125	8.46695	8.241844618847722	90 min
96.38002	7.2885100000000005	7.562262385917745	90 min
76.71576999999999	7.82572	10.200927397326522	90 min
129.02311	9.51489	7.374562588051085	90 min
79.76626	6.66793	8.359336391100697	90 min
75.69783000000001	6.766369999999999	8.938657818856893	90 min
77.25086999999999	6.55916	8.490726382757892	90 min
78.20931	8.361839999999999	10.69161714890465	90 min
103.85836	9.31231	8.966355717536844	90 min
92.88125	11.26453	12.127883722495122	90 min
153.12682	13.366610000000001	8.729110942158924	90 min
111.18805	11.59791	10.430896125977567	90 min
81.3582	7.4529	9.160600898249962	90 min
83.97998	8.19023	9.752598178756413	90 min
96.4986	7.883189999999999	8.16922732557778	90 min
115.10488000000001	9.83637	8.545571656040995	90 min
116.24561000000001	10.74238	9.241105965205913	90 min
126.04123	11.91592	9.453985810833487	90 min
147.4596	13.400720000000002	9.087723010234669	90 min
101.35866	13.11752	12.941686482437712	90 min
94.60566	9.17832	9.701660556038613	90 min
80.94317	7.516489999999999	9.28613248035628	90 min
88.51477	8.024989999999999	9.06627221648997	90 min
115.4215	9.70986	8.412522796879266	90 min
155.11437	13.62165	8.78168154246444	90 min
101.49143000000001	9.28608	9.149619825043356	90 min
72.61824	7.449039999999999	10.257808506512964	90 min
90.96417	9.31356	10.23871267115393	90 min
102.36423	10.35211	10.113015063953492	90 min
128.45025	12.300939999999999	9.576423556980231	90 min
87.73659	8.83681	10.071977951274375	90 min
126.04146000000001	10.4944	8.326149189322308	90 min
63.72429	7.05098	11.06482316240793	90 min
89.09741	6.794910000000001	7.626383303397934	90 min
90.41816	5.8811800000000005	6.504423447679095	90 min
104.19018	6.901160000000001	6.623618463851392	90 min
75.2909	7.0228600000000005	9.327634548132645	90 min
68.63125	7.961110000000001	11.599832437847192	90 min
102.73177	9.599639999999999	9.344373215802666	90 min
94.91001999999999	8.99545	9.47787177792187	90 min
89.01916999999999	8.88517	9.981187198218093	90 min
75.61508	10.76999	14.243177419107406	90 min
85.87338000000001	10.15307	11.82330310044859	90 min
75.92107	5.98182	7.878998544145914	90 min
117.62691000000001	10.683	9.082105446789344	90 min
95.31266	8.446110000000001	8.861477583355665	90 min
122.01158999999998	9.73184	7.976160297558618	90 min
86.82098	8.19172	9.435184905768168	90 min
80.888	9.28766	11.482123429927801	90 min
81.4443	7.2005	8.841011587060112	90 min
64.07773	6.08389	9.494546701326655	90 min
97.16304000000001	9.0558	9.320210647999486	90 min
76.01044	9.21307	12.120795511774435	90 min
142.69127	12.52116	8.775000741110512	90 min
141.34966	11.84331	8.378732569996986	90 min
100.27823000000001	9.11587	9.090577286814893	90 min
106.51332	10.84746	10.184134716672057	90 min
125.04896000000001	10.75453	8.600255451944584	90 min
145.21799	12.27289	8.451356474497409	90 min
138.79848	13.1897	9.502769770965791	90 min
138.21552	12.32472	8.917030446363764	90 min
134.52289	10.738710000000001	7.982812441808232	90 min
107.95938999999998	10.43464	9.665338049798171	90 min
97.70822	9.11229	9.326021904810055	90 min
112.92318	10.02489	8.87761928064725	90 min
106.75555	8.25562	7.733199819587834	90 min
139.06374	12.75837	9.174476394781271	90 min
126.29218999999999	12.07798	9.563520911308926	90 min
103.26359000000001	10.48497	10.153598184994344	90 min
94.51406	7.56685	8.00605751144327	90 min
94.66458	8.39685	8.870107488989017	90 min
79.60903	7.498060000000001	9.41860489946932	90 min
89.82869000000001	8.765460000000001	9.757973760944303	90 min
98.2487	9.3255	9.49172864373778	90 min
73.91685	8.45685	11.441031375119474	90 min
71.91336	9.22216	12.8239870866832	90 min
67.43745	7.822189999999999	11.59917820142962	90 min
62.16243000000001	7.3485	11.821449064973809	90 min
77.81436	8.10771	10.419297929071192	90 min
61.39869	7.86337	12.80706477613773	90 min
89.40541	8.62854	9.651026710799716	90 min
127.04588999999999	12.14102	9.556405169816985	90 min
99.13457	9.783669999999999	9.869079978861055	90 min
88.96887	9.843060000000001	11.063487712050296	90 min
130.93739	12.728810000000001	9.721295040324236	90 min
61.85071	8.30195	13.422562166222503	90 min
132.95439	11.92724	8.970926044638315	90 min
118.4091	9.82117	8.294269612724023	90 min
50.351620000000004	9.02697	17.927864088583444	90 min
142.68036999999998	12.49845	8.759754407701635	90 min
117.90218999999999	10.74169	9.110678944979734	90 min
97.10501	8.0187	8.257761365762695	90 min
107.13358000000001	9.391580000000001	8.766233705622458	90 min
102.73108	9.80754	9.546809008529843	90 min
98.1192	9.03243	9.205568329134358	90 min
111.28804	10.34402	9.294817304716663	90 min
77.18621999999999	8.17561	10.592059048882044	90 min
83.88549	8.42704	10.045885170367367	90 min
102.75522	8.66623	8.433858639979556	90 min
94.32753000000001	8.8513	9.383580806154894	90 min
92.64361	8.816139999999999	9.516187894664293	90 min
101.99529	9.1363	8.957570491735451	90 min
70.16088	8.369760000000001	11.929382869770164	90 min
77.90963	8.75555	11.238084431924525	90 min
70.91761	6.60567	9.314569399617387	90 min
71.09713	7.92053	11.14043562658577	90 min
71.49464	8.74121	12.226385082853763	90 min
49.42118	8.738610000000001	17.68191289645452	90 min
120.24746	10.620289999999999	8.83202855178812	90 min
83.35365	5.21414	6.255442923015369	90 min
61.8972	8.57116	13.847411514575784	90 min
90.12756999999999	8.41185	9.333270607429004	90 min
83.77364	9.25018	11.041874269758363	90 min
88.27033	10.22205	11.580391735252377	90 min
92.19912	13.502070000000002	14.644467322464685	90 min
108.49633999999999	9.94913	9.170014398642389	90 min
153.88908	13.53965	8.798317593425082	90 min
89.64584	10.37884	11.577603601014836	90 min
104.94303000000001	10.01484	9.54312068176419	90 min
113.06801000000002	10.38985	9.189027028953634	90 min
136.0681	10.87957	7.995680104300715	90 min
135.04873	11.18224	8.280151912572595	90 min
125.2072	11.1661	8.918097361813059	90 min
118.23608	10.7724	9.110924516442019	90 min
84.56293000000001	8.592239999999999	10.160764297074378	90 min
83.35212	7.881539999999999	9.45571630331658	90 min
89.38775	12.05269	13.483603737648616	90 min
95.2564	8.8183	9.257435720854453	90 min
108.93574	12.237160000000001	11.233374831804513	90 min
132.58291	13.10388	9.883536271756292	90 min
71.42896999999999	13.08652	18.321025768676215	90 min
74.48836999999999	7.87017	10.565635950954492	90 min
83.2011	6.40885	7.702842871067811	90 min
114.69601000000002	11.76711	10.259389145271923	90 min
83.78214	7.91032	9.441534914243059	90 min
76.79964	7.386830000000001	9.618313315010333	90 min
68.90651	8.15356	11.832786191028976	90 min
84.50689	7.6587	9.062811328165076	90 min
78.56403	8.46247	10.771430640714332	90 min
78.70130999999999	7.99322	10.15640019206796	90 min
118.85987	10.72455	9.022851867497415	90 min
115.01151999999999	10.61032	9.225441068859885	90 min
126.3234	12.10807	9.58497792174688	90 min
132.47316999999998	11.98118	9.044231371529799	90 min
112.72458999999999	11.02084	9.776784284600193	90 min
115.77646999999999	10.15935	8.774969559876892	90 min
79.01705	9.458639999999999	11.970378544883667	90 min
95.62261	8.861939999999999	9.26761986521807	90 min
79.82796	8.77406	10.991211600546977	90 min
86.64688000000001	8.15221	9.408544196859712	90 min
84.2034	9.032210000000001	10.726657118358641	90 min
78.78886999999999	7.75045	9.836985858535604	90 min
78.50504000000001	7.3815100000000005	9.4025937697758	90 min
83.61515	7.763039999999999	9.284250521586099	90 min
86.9664	8.07206	9.281814585863048	90 min
80.37056	7.29133	9.07214034591771	90 min
81.67564	6.6928399999999995	8.194413903582513	90 min
84.67392	9.18266	10.844732356787073	90 min
84.08027	8.42222	10.016880297839196	90 min
97.26505999999999	9.67682	9.948916908086007	90 min
99.69554000000001	8.9067	8.933900152404009	90 min
84.39533	7.83448	9.283072890407562	90 min
137.07175	11.56793	8.439324660260047	90 min
67.80368	7.278160000000001	10.734166641102668	90 min
70.76241999999999	7.04005	9.948854208208257	90 min
134.8165	11.73564	8.70489888107168	90 min
135.34483999999998	11.77233	8.698026463365727	90 min
103.94188	8.86552	8.529305030849933	90 min
130.38135	10.69908	8.205989583632936	90 min
93.2319	7.36875	7.903678891023352	90 min
114.98263999999999	8.55525	7.440471013711288	90 min
93.91655	8.59676	9.153615630046035	90 min
140.23631	11.15795	7.956534224267594	90 min
107.73388999999999	8.89115	8.252881242847538	90 min
120.88112	9.62945	7.966049619659382	90 min
105.54397	9.2651	8.778426659523989	90 min
115.38303	9.73271	8.435131232036461	90 min
113.98541999999999	9.72867	8.535012635826583	90 min
100.11455	8.17742	8.168063483279903	90 min
121.49903	9.3701	7.712078030581808	90 min
132.80182	9.71434	7.3149148106554565	90 min
109.22469	8.85415	8.106363130900167	90 min
108.33123	8.77543	8.100554198452285	90 min
74.84231	7.998660000000001	10.687350510693753	90 min
99.90935999999999	7.938269999999999	7.9454717756174205	90 min
79.61205	6.97732	8.764150653073246	90 min
111.04868	8.376389999999999	7.542989254802487	90 min
87.231	7.16343	8.212023248615745	90 min
117.98851	9.990680000000001	8.467502471215207	90 min
132.04418	10.74768	8.139457566399368	90 min
148.29109	11.26561	7.596956769283982	90 min
83.37665	6.22396	7.464871759659329	90 min
82.89628	6.58593	7.944783529490104	90 min
87.38673	7.59404	8.690152383548394	90 min
100.26768	11.10815	11.07849508435819	90 min
141.25739	13.16811	9.322068034812197	90 min
109.35146	6.76773	6.188970865135226	90 min
122.95382	7.857139999999999	6.390317925868427	90 min
105.91856999999999	11.33945	10.705818630293065	90 min
124.7837	9.83035	7.877911938818932	90 min
100.49928	8.13536	8.094943565764849	90 min
79.14323	5.36397	6.777547492059649	90 min
103.35916	8.29963	8.029893044796417	90 min
221.59666	17.29685	7.805555372540361	90 min
165.77607	13.607460000000001	8.208337910290672	90 min
135.45228	11.81077	8.719506234963339	90 min
71.7135	6.13347	8.552741115689514	90 min
153.19743	11.11556	7.255709185199779	90 min
109.571	9.08152	8.288251453395516	90 min
121.11261	11.35174	9.372880330132427	90 min
108.59867	8.85235	8.151435003762016	90 min
83.15637	5.72545	6.88516105260487	90 min
87.11565999999999	7.58591	8.707860331885222	90 min
64.66903	5.73604	8.869840787777395	90 min
69.96149	4.8767	6.970549083502939	90 min
136.35772	10.24279	7.511705241184731	90 min
109.97613999999999	14.594220000000002	13.270351187084763	90 min
88.25876	6.11257	6.925737456542558	90 min
80.18399000000001	8.51567	10.62016245387639	90 min
102.04132	11.35476	11.127609874117663	90 min
156.57124	12.50896	7.989308892233337	90 min
115.78486000000001	10.17637	8.789033384848416	90 min
96.16834	7.9583	8.27538460162669	90 min
97.4316	7.75857	7.9630941090980745	90 min
117.84761999999999	8.84735	7.507449026123735	90 min
110.52864	8.698030000000001	7.869480706539049	90 min
123.04771000000001	11.51528	9.358386271471447	90 min
92.26924	9.17892	9.947973994366919	90 min
91.01941	6.78017	7.449147385156639	90 min
82.96328000000001	4.82504	5.815874203623578	90 min
90.36158	7.590560000000001	8.400207256225489	90 min
96.4184	7.338189999999999	7.610777610912439	90 min
73.7629	6.8140600000000004	9.237787559870885	90 min
111.98771	8.21417	7.334885229816734	90 min
96.24374	8.82068	9.164938935249191	90 min
79.85928	5.80647	7.270876972594794	90 min
69.70254	5.70463	8.1842498135649	90 min
71.92607	5.65073	7.856303006684503	90 min
70.7969	4.66592	6.590571056077314	90 min
70.22988000000001	5.9200800000000005	8.429574420460352	90 min
132.74376	11.33767	8.54101917860395	90 min
95.33925	8.90098	9.336112881106155	90 min
104.00107	8.88205	8.540344825298432	90 min
68.40369	6.7046	9.801518017522156	90 min
91.99189	8.20153	8.915492441779378	90 min
86.2948	6.40757	7.4252098620079074	90 min
80.4276	6.30296	7.8368122385847645	90 min
121.07621	9.90402	8.179988455205196	90 min
86.09102	7.337330000000001	8.52275881967713	90 min
84.91144	6.64502	7.825824176341845	90 min
152.07482	12.60971	8.291780322343962	90 min
147.74432	12.48956	8.453495877201913	90 min
92.17803	6.96162	7.552363616362815	90 min
84.37073000000001	7.003489999999999	8.300852677225857	90 min
133.01023	10.42072	7.8345252090760225	90 min
107.89806999999999	8.387260000000001	7.7733179101350025	90 min
109.26405	9.16196	8.385155044133914	90 min
73.46504	7.05881	9.608393325587246	90 min
73.67206	5.95317	8.080634639509197	90 min
77.02212	6.50481	8.445379067727558	90 min
70.28049	4.41948	6.288345456897071	90 min
76.38489	3.3826699999999996	4.428454371015	90 min
65.97119	5.1409	7.792644031432508	90 min
79.18098	5.24946	6.629698192672027	90 min
85.86343000000001	8.23635	9.592384091807187	90 min
72.84012	5.43982	7.468164522518634	90 min
76.73501	6.10277	7.953045161524054	90 min
150.78906	12.177480000000001	8.075837862508063	90 min
82.69456	7.115489999999999	8.604544240878722	90 min
105.81267	7.95799	7.520829027374509	90 min
80.51443	6.874039999999999	8.537649710741292	90 min
80.29512	6.875319999999999	8.562562706176912	90 min
165.60044	13.943470000000001	8.419947434922276	90 min
144.00925	12.5393	8.707287899909208	90 min
110.18695	10.45677	9.490025815216775	90 min
72.01132	6.094469999999999	8.463211061816391	90 min
110.96208	8.76698	7.9008792913759365	90 min
126.59066000000001	10.08211	7.964339549221087	90 min
131.22576999999998	11.10239	8.460525703145045	90 min
98.084	8.001339999999999	8.157640389869906	90 min
104.13602	9.31002	8.940249492922813	90 min
156.05885	12.61711	8.08484107117283	90 min
164.77252	14.5989	8.860033214276266	90 min
140.94212	12.7382	9.03789442077358	90 min
102.74894	9.082	8.839020626392836	90 min
103.81328	9.779739999999999	9.420509591836417	90 min
109.57238999999998	10.858319999999999	9.909722695653532	90 min
142.96396000000001	12.07802	8.448297039337746	90 min
123.59778999999999	11.50038	9.30468093321086	90 min
146.27459	12.28148	8.39618145571285	90 min
148.17553	13.42039	9.05708925083649	90 min
128.23379	11.588610000000001	9.03709544886726	90 min
105.13253999999999	10.33939	9.83462398987031	90 min
97.04533	8.95712	9.229831049057177	90 min
107.61613999999999	9.46612	8.796189865200517	90 min
113.65031	8.473419999999999	7.45569457751589	90 min
105.46621999999999	9.74324	9.238256571630235	90 min
90.15786	8.64221	9.585642338893138	90 min
128.9109	10.53175	8.169790141873186	90 min
83.93853	6.71824	8.003761800450878	90 min
95.11079000000001	8.85828	9.313643593960265	90 min
93.30100999999999	9.40527	10.080566116058124	90 min
90.57545999999999	8.64446	9.543931656543617	90 min
112.11838999999999	9.8654	8.799091745787644	90 min
107.4917	9.216339999999999	8.574001527559801	90 min
97.14338000000001	9.67095	9.95533612274969	90 min
107.62365	11.73585	10.904527025426102	90 min
103.74465	10.85675	10.464876984017971	90 min
89.59976	9.18528	10.251456030685796	90 min
129.04545	12.23655	9.482356797546911	90 min
93.15035999999999	8.403960000000001	9.021929705907741	90 min
99.55341999999999	8.05767	8.093815360637537	90 min
73.82975	8.43683	11.427412391346307	90 min
89.3359	7.74516	8.669706131577563	90 min
75.80848	7.7046	10.163242951184353	90 min
[truncated: 601 more rows]
