# Supplementary material for: Control of nuclear size by osmotic forces in Schizosaccharomyces pombe
Source: eLife. 2022 Jul 20;11:e76075. doi: 10.7554/eLife.76075 (PMC9410708; doi:10.7554/eLife.76075)
Supplement: Figure 5—figure supplement 1—source data 2. — Related to Figure 5—figure supplement 1. [file elife-76075-fig5-figsupp1-data2.xlsx]

## Sheet: Sheet1
Time	0 min	15 min	30 min	60 min
	0.7945736813022374	0.8402880662265124	0.9213048045179505	1.0332283391247323
	0.7383138085452869	1.140541437102425	0.9766006109429367	1.050304947098968
	0.6758908922821911	0.8109060674766222	0.7975526914169958	0.8736285349340189
	0.7555984246843802	0.8067467178538961	0.9720458532885123	0.9556351669646618
	0.6673540852438672	0.8705346276595457	0.9048817278816437	0.935223180183404
	0.7701182149256277	1.0244317207626985	0.8336182427784634	0.860879779848368
	0.7051417690432633	0.8113950303857328	1.06732873601962	1.0154996107781051
	0.6423008180119337	0.8972252307844031	0.8860457184918229	0.7965284773549749
	0.6669604954246018	0.8963409486056935	0.9098337019278282	1.1027263637046423
	0.8215455790196998	0.9269414523669681	1.1016906562607633	1.3238674015870049
	0.7145479247977015	0.7679490599930743	0.9272204536636715	0.9708591392787504
	0.6546749252431303	0.8811686452555604	0.8449221559224979	1.0509163661963747
	0.7501725772266542	0.912609112541196	0.8783917121848057	0.8662194647498701
	0.751825685340723	0.9780294151685908	0.8271923195506897	1.1714839430369384
	0.8726267452827716	0.8230875689765916	1.081303336523471	0.8396922746198935
	0.607507662983886	0.8237821079781987	0.6811544858081447	0.9784536434797163
	0.7055909379715878	0.9142326034223242	0.7588676528004119	0.847521408329899
	0.6356594984319023	0.9595710585839086	0.6814006891367005	1.027534031982094
	0.7693909263610282	0.8756134417475712	0.721708463784863	0.7685287363195201
	0.6522508387238745	0.8507874704752848	0.8658715425633333	0.9112548719538299
	0.8093048769384334	0.7912286226807185	0.6565579312373099	0.9094041277996217
	0.7007468770192936	0.8143728490235336	0.7555313543723402	0.7720190976844769
	0.799956354290516	0.9382998244382655	0.6969359954439662	1.1654762861993797
	0.7554153243326479	0.7516189697939754	0.6486365396139552	0.9466813706401809
	0.6316655249452449	0.9855248121614535	0.6961352964402219	0.9569550974042905
	0.7931589248519754	0.8072048782613616	0.8056783204588774	0.9426952783386151
	0.7068147516561214	0.8392904871065675	0.6195410901277247	0.8632118327739097
	0.6600607161302421	0.915896006003715	0.7197304445607016	0.8738120317147186
	0.7161218533569835	0.9460408017234088	0.8577919316779828	0.82089208636623
	0.7854393500017925	0.9555849902236644	0.7776337079831799	1.01392700569024
	0.7394108443038836	0.8508436030125919	0.6889371393575316	0.7637383546406652
	0.6735562097002624	0.9489549132326233	0.736948411628713	1.0231089298254301
	0.6844148857393313	0.8703386697888246	0.6240643799619359	1.0116903795998047
	0.7686012369260308	0.7147193417623973	1.081303336523471	0.8801086778636682
	0.7758602521689258	0.7192240078659142	0.7135846543258583	0.8490796479526418
	0.7532184414583823	0.6421626720413478	0.6618148964448729	1.0210519678539849
	0.6746881632733875	0.6462988797093804	0.6449796801274922	0.9495277504401282
	0.8468006214428635	0.7100461095970426	0.7982485567646412	0.8518064248868783
	0.830129318273451	0.7744876049784519	0.7559238390692148	0.8875629186367208
	0.7535014578688461	0.6992810944351242	0.8324869968076966	0.9751858456634638
	0.6861035330001218	0.897029144348785	0.7890644607474399	0.6259216943286839
	0.8251401530426138	0.8047906728130543	0.7942224791305278	0.7001000915490362
	0.7905618957990442	0.7281949498574253	0.5188701190880133	0.7380320181880294
	0.7270739612799989	0.736505685766146	0.6990676335994864	0.6242681074406646
	0.6616529969897943	0.798257923810069	0.9060551823231087	0.6529752191424605
	0.6472277226086585	0.7035629759857082	0.9208235598385714	0.6353242372621596
	0.8180213657620942	0.7564522828420245	0.7446339077289329	0.6505587944602884
	0.6836357826147498	0.7526871041361168	0.6692842422517248	0.8038029631733118
	0.7041825560672428	0.8500502423115663	0.7252219740219243	0.6958468104673348
	0.6549131738248737	0.7258706222278385	0.8736465134924842	0.7324525686054161
	0.6270771696588445	0.687025039940578	0.7239457735662602	0.7044144568650021
	0.7178231471025888	0.7093746240548733	0.83802608388313	0.7935292029231925
	0.6640107245996945	0.6114341526985053	0.7536194338110411	0.7151214078134492
	0.924208268201248	0.7664845861175091	0.6439953556125618	0.7449506755538473
	0.6744844767029617	0.6304314518278081	0.6978327519038753	0.6496325294673605
	0.6374147052854796	0.70960191638468	0.7664642795713236	0.7439741219455543
	0.8321718070135016	0.7526759845746144	0.8134241802708896	0.6333870438914311
	0.7749768843668748	0.8374060214507478	0.7560670772968635	0.9509631224797687
	0.8366198759633805	0.7098863060395303	0.8032181498534708	0.6518068004225214
	0.6237992128077635	0.7107236792782043	0.8517930060434146	0.7742580374300347
	0.7468439344688496	0.9309102104514587	0.8119673963447703	0.8343198286022302
	0.6971907399941353	0.6929916097849007	0.6173896094778271	0.8086919323015396
	0.7362678718077411	0.601074880385351	0.816214704972075	0.7919508381838612
	0.6720924472400582	0.7718660854680804	0.719759892049793	0.774661488594895
	0.7174324551790559	0.6886482804682265	0.7419882242825934	0.6254983488362449
	0.7451418581013199	0.7405983244271301	0.6625395685101105	0.7642786024328477
	0.6628751211336498	0.7848642138428318	0.7675104266317936	0.6554644223205218
	0.8102904146671178	0.7389278856854871	0.8395217560775249	0.6971542039963262
	0.7203933433874602	0.7429626795556409	0.7428620121341986	0.7304220016370994
	0.8150705713662555	0.667809367683262	0.6847996914784942	0.6827808568766286
	0.7170996389125899	0.7861555167304912	0.8202803741515202	0.7059688889645594
	0.7945736813022374	0.739697204725803	0.713332802677529	0.6732395305469754
	0.7383138085452869	0.7227600028902418	0.8207857655954207	0.8687572389591922
	0.6758908922821911	0.720927281219648	0.7343989484600776	0.7519195972664999
	0.7555984246843802	0.7457245812437164	0.8014199998434245	0.7678439415243759
	0.6673540852438672	0.6954373622163067	0.6245615059525058	0.7602510362830478
	0.7701182149256277	0.6405622822177028	0.9180848079097813	0.8333205895616312
	0.7051417690432633	0.7180176980455925	0.8297525495269303	0.7460223556043087
	0.6423008180119337	0.7055148937146417	0.8225220233297935	0.7200426568094099
	0.6669604954246018	0.6904881184605428	0.6728164646947628	0.7140380021694839
	0.8215455790196998	0.7965028591640012	0.7025254517335088	0.6344920396001993
	0.7145479247977015	0.7815140632533375	0.8241945719266625	0.6933217445491846
	0.6546749252431303	0.7409445565124015	0.7773926486130521	0.7437683258452231
	0.7501725772266542	0.6358384887964303	0.7165691982579532	0.6796152274485143
	0.751825685340723	0.7221415831315258	0.8190572806919956	0.6385940504140928
	0.8726267452827716	0.7269018487186831	0.9626366747340455	0.6753828057272141
	0.607507662983886	0.6494777331781968	0.8670465148531675	0.7580336953060111
	0.7055909379715878	0.9033838471682899	0.7858952080782593	0.8496328602289063
	0.6356594984319023	0.9056220174269428	0.7468659114584281	0.7576346704291795
	0.7693909263610282	0.8458507655746696	0.9325050039994577	0.7320710097727335
	0.6522508387238745	0.8814650444109101	0.7724870878935349	0.6951760029944446
	0.8093048769384334	0.7540908067136985	0.7953372201232414	0.9287965174795817
	0.7007468770192936	0.7448241400169036	0.7153685523319785	0.8124244551010841
	0.799956354290516	0.9367631450367331	0.8046231077654277	0.789782281545718
	0.7554153243326479	0.7650371739903262	0.8282651424562741	0.8704857867701272
	0.6316655249452449	0.7264484381589807	0.8565912282474872	0.8359202910087926
	0.7931589248519754	0.7892607464834691	0.8577714857643252	0.6313271503756965
	0.7068147516561214	0.7965877977315907	0.755720665007224	0.9386714431032582
	0.6600607161302421	0.6974727795898306	0.7176828025743934	0.7315874216313714
	0.7161218533569835	0.6618462517243786	0.8029865481208737	0.8462451665647913
	0.7854393500017925	0.7130706265715459	0.7770188809917626	0.6751731099707036
	0.7394108443038836	0.7551155200983669	0.8282949595757462	0.5503317700231449
	0.6735562097002624	0.7896394544521846	0.7207523579021072	0.6780026677152802
	0.6844148857393313	0.8763607516639971	0.7956958457299774	0.560124779991707
	0.7686012369260308	0.8113692916309112	0.7267653168354589	0.6928784972836307
	0.7758602521689258	0.7629826864929908	0.8965592298309576	0.637360494703035
	0.7532184414583823	0.7528951860340974	0.6764319660420365	0.6836164443511502
	0.6746881632733875	0.7923804111752922	0.6911226394763931	0.7858109756991676
	0.8468006214428635	0.764360853709709	0.7087241054026823	0.6970717274447537
	0.830129318273451	0.7765424834094694	0.6744201309324216	0.9193276100495449
	0.7535014578688461	0.8522263954887981	0.739521890829619	0.686613077475537
	0.6861035330001218	0.9123901961450003	0.7209328109114203	0.6308630735227325
	0.9260876333240212	0.8478580804439523	0.6661024558292405	1.0754227320491105
	0.9257007693238587	0.8531120339240624	0.7088388891510908	0.7311678808502577
	0.8793248273515933	0.7026022064911795	1.0063632181577518	0.8318969550492773
	0.9200685657207697	0.6924951947042979	0.8110740714087348	0.722583223496602
	0.8779966609240256	0.6944688831820273	0.8443530722189823	0.8721955680985088
	0.8488190442164119	0.7381783434074292	0.7121256473824672	0.6213725409623193
	0.7814388440643715	0.7840669949478235	0.6519390302625365	0.6556707855798227
	0.8227107585568897	0.7218292769448545	0.606444937215424	0.735510536912567
	0.8035767911752819	0.883642538947736	0.6796608622554299	0.7723633878427039
	0.8178530440538457	0.814544420816442	0.6842666580103154	0.8348529220963611
	0.9595400221164903	0.676514811485723	0.8711398621529822	0.674285194337252
	0.9299065375020094	0.7488190841584511	0.7611673213912924	0.6160047710864531
	0.7571858918661956	0.6386771962836199	0.8346356117873963
	0.8519138501497976	0.7480124253288397	0.7701478637672973
		0.6218427898742948	0.6827043335190872
		0.6984670003737301	0.7239977935595479
		0.7755923778685024	0.8710014875796857
		0.5448914251295479	0.7411202783654512
		0.6795632255377171	0.7087054922292222
		0.6808795021288443	0.6201147478631377
		0.7327158060811109	0.6693213334901421
		0.6343431408093171	0.7617538227346733
		0.7956813431590223	0.6723367691559904
		0.9293244550302885	0.742005717549973
		0.6669648960582324	0.6740301494194924
		0.718526778315119	0.7476324409170885
		0.7133823902620284	0.7705306782320832
		0.6932168442248595	0.9512713703908557
		0.661688770600715	0.7904336643837
		0.7488095294848999	0.8158836754537047
		0.8147403530193117	0.8960270251531275
		0.766892621118394	0.7612046356844798
		0.8239661786838343	0.8085027340178136
		0.654817051138087	0.865874365674455
		0.8143341797121727	0.6386748635224285
		0.9859085033344117	0.7153637483775727
		0.7497301904697785	0.7467551674252352
		0.760175865248	0.7767512424847947
		0.9518976838303783	0.7539548328132049
		0.7057644745329947	0.7792611416750347
		0.6166666919043353	0.5964809879674626
		1.0202641784415478	0.7960914268412292
		0.6344144561405906	0.7108043612218844
		0.9216024328516921	0.6823593211177015
		0.6705993779963697	0.8141917588669715
		0.667638635526636	0.7159578941034322
		0.7845160848257882	0.6820737488012993
		0.6282107522395497	0.7508785976671947
		0.7873525777383034	0.7476149538333517
		0.6072003110742099	0.7773437503988376
		0.7575229205376969	0.8507527120874026
		0.7387675660256	0.7242944423037704
		0.7224905653478415	0.8604734915978028
		0.6936689720424184	0.8252070208325923
		0.6168225266476172	0.8073716253730139
		0.5762688473934658	0.8374299893629558
		0.5964001182581193	0.8810985625561082
		0.8086381962541179	0.728011647851777
		0.7716420769915012	0.7272169142536291
		0.6897456564282665	0.9233480069912959
		0.7674744520978342	0.7660590539554565
		0.6373636271028369	0.7917108608876704
		0.7331578642216545	0.7147152255383895
		0.7699946449799739	0.9144088508403262
		0.8726790406541446
		0.9289149799685151
		0.8400193216805614
		0.768050206015458
		0.8162128056270809
		0.6634925824850006
		0.8038730570266807
		0.6995000732615742
		1.0013092180985061
		0.918117131442084
		0.7460349434010638
		0.8562728162390183
		0.865242727292855
		0.7112267541134503
		0.7052459473862018
		0.7884891781031788
		0.7908475523652239
		0.7635343171520143
		0.794050199271766
		0.8318153239050576
		0.6984296912538466
		0.7623242837368509
		0.765652051823206
