# Supplementary material for: Control of nuclear size by osmotic forces in Schizosaccharomyces pombe
Source: eLife. 2022 Jul 20;11:e76075. doi: 10.7554/eLife.76075 (PMC9410708; doi:10.7554/eLife.76075)
Supplement: Figure 5—figure supplement 2—source data 1. — Related to Figure 5—figure supplement 2. [file elife-76075-fig5-figsupp2-data1.xlsx]

## Sheet: Sheet1
Volume Cell	Volume Nucl	Time	N/C ratio	Condition			Volume Cell	Volume Nucl	Time	N/C ratio	Condition
93.284	8.08427	0	8.666298614982205	LMB			83.43106999999999	7.21215	0	8.64444145328593	Ctrl
103.56585	8.81968	0	8.516011793462805	LMB			96.04058	8.026010000000001	0	8.356894554364416	Ctrl
76.39158	7.8623899999999995	0	10.292220687149028	LMB			91.38064	8.64594	0	9.46145704385524	Ctrl
76.95692	8.52914	0	11.083005920715122	LMB			89.63828000000001	7.77095	0	8.669231493509246	Ctrl
78.20466	7.74564	0	9.90432027963551	LMB			120.28871000000001	9.31485	0	7.743744196774577	Ctrl
95.98711999999999	8.49563	0	8.850802065943848	LMB			80.98361	7.77873	0	9.605313964146573	Ctrl
97.11343000000001	8.9193	0	9.184414555226809	LMB			83.96016999999999	7.7331	0	9.210438711593845	Ctrl
125.62403	11.26573	0	8.967814517652394	LMB			84.88866	7.16317	0	8.43831201953241	Ctrl
83.40935999999999	8.77721	0	10.523051609555571	LMB			80.32091	8.31454	0	10.351650647384348	Ctrl
77.60921	9.38959	0	12.098551189994074	LMB			81.4964	8.06456	0	9.895602750550946	Ctrl
87.95868	8.42587	0	9.579350213077323	LMB			91.57264	8.17436	0	8.926640096867361	Ctrl
110.00233	9.17296	0	8.338877912858754	LMB			94.74598	8.925469999999999	0	9.420420792523334	Ctrl
100.40231999999999	11.41948	0	11.373721244688372	LMB			88.85396	7.8972	0	8.887842477701613	Ctrl
85.2739	7.35418	0	8.624186298503998	LMB			89.88327	8.90514	0	9.907449962601493	Ctrl
145.18248	12.22985	0	8.423778130804765	LMB			101.83448	7.86332	0	7.721667553072398	Ctrl
111.34643999999999	9.80273	0	8.803810880707099	LMB			93.68826999999999	8.80141	0	9.394356411960645	Ctrl
90.67224	9.08215	0	10.016461488102642	LMB			87.70343000000001	7.47772	0	8.526143162245763	Ctrl
87.37915	7.63587	0	8.738778072343345	LMB			89.38779	7.841360000000001	0	8.772294292095152	Ctrl
131.03982	12.07502	0	9.214771509912026	LMB			95.86350999999999	7.687530000000001	0	8.01924527904309	Ctrl
104.14715	9.526	0	9.146673720788327	LMB			103.32202	8.89512	0	8.609123205295445	Ctrl
85.72514	8.55667	0	9.981517673811908	LMB			87.56192	7.85465	0	8.97039489312249	Ctrl
86.11035	7.040589999999999	0	8.176241299681164	LMB			87.84402	8.384039999999999	0	9.544235338956481	Ctrl
88.99672	7.13323	0	8.01516055872621	LMB			89.55745	8.19186	0	9.147044718222773	Ctrl
96.14759000000001	8.51403	0	8.85516735260863	LMB			103.32202	8.89512	0	8.609123205295445	Ctrl
89.36939	10.694510000000001	0	11.966636451250256	LMB			87.56192	7.85465	0	8.97039489312249	Ctrl
95.66114	9.48875	0	9.919127035283083	LMB			80.60871999999999	7.43567	0	9.22439904764646	Ctrl
105.79795	9.64991	0	9.121074652202617	LMB			77.64258000000001	7.05991	0	9.09283282446307	Ctrl
107.5412	10.54375	0	9.804381948499737	LMB			115.29483	8.672310000000001	0	7.5218550562935045	Ctrl
89.13809	9.272689999999999	0	10.402612396114835	LMB			92.8205	7.84634	0	8.453240394093978	Ctrl
110.6075	9.79951	0	8.859715661234546	LMB			119.90713999999998	10.93971	0	9.123485056853163	Ctrl
84.60334	8.50105	0	10.04812575957403	LMB			60.72899	5.56045	0	9.156170718465761	Ctrl
109.82208999999999	10.74978	0	9.788358607999537	LMB			79.2575	7.07977	0	8.932618364192663	Ctrl
98.94266	9.33261	0	9.432341924100282	LMB			97.42581	8.252289999999999	0	8.470332450918292	Ctrl
102.61459	10.19702	0	9.937202887035848	LMB			120.23968	10.00324	0	8.319416685074344	Ctrl
96.28663	8.47237	0	8.79911364641176	LMB			108.36063	8.92367	0	8.23515883951579	Ctrl
94.33426999999999	8.44219	0	8.949229161364158	LMB			106.19135	10.3276	0	9.725462572987349	Ctrl
105.75858999999998	9.37115	0	8.860887801170573	LMB			73.61518000000001	6.58692	0	8.947774086811986	Ctrl
75.42669000000001	7.4257800000000005	0	9.845029657273837	LMB			95.50421	8.122810000000001	15	8.505185268796005	Ctrl
88.86715	8.5438	0	9.614126254752177	LMB			102.8312	8.44394	15	8.211457223099604	Ctrl
92.13176999999999	8.34266	0	9.055139177289226	LMB			100.93815	9.30108	15	9.2146329212493	Ctrl
89.93822	7.364660000000001	0	8.188576558442007	LMB			98.40368000000001	8.632480000000001	15	8.77251745056689	Ctrl
91.75957	8.69325	0	9.47394369873355	LMB			127.56106000000001	9.644860000000001	15	7.5609751126244955	Ctrl
89.55756	8.237810000000001	0	9.198341267895197	LMB			89.29618	7.82741	15	8.765671723023313	Ctrl
93.28683000000001	8.021139999999999	0	8.598362705646657	LMB			93.2076	8.776580000000001	15	9.416163488814218	Ctrl
100.92213000000001	10.08279	0	9.99066309837099	LMB			91.86231	7.52672	15	8.193480002843387	Ctrl
102.64716	9.2479	15	9.00940659244737	LMB			89.8867	8.8281	15	9.821364006020913	Ctrl
111.74928	9.95304	15	8.906580874615031	LMB			89.09663	8.83745	15	9.918949796417664	Ctrl
83.23789000000001	8.79086	15	10.561127870973182	LMB			101.8087	9.192730000000001	15	9.029414971412072	Ctrl
86.58825	9.928289999999999	15	11.466093840676995	LMB			106.83811999999999	9.852260000000001	15	9.221671066469536	Ctrl
88.04351	8.12011	15	9.222837662878275	LMB			94.98999	8.57953	15	9.032035901888188	Ctrl
107.07847	10.54373	15	9.846732027456127	LMB			98.06939	9.66093	15	9.851116643021845	Ctrl
104.74514	10.1834	15	9.722073978802262	LMB			105.21882	8.24892	15	7.839776192129888	Ctrl
139.19038999999998	12.80446	15	9.199241413146412	LMB			99.30561999999999	9.39962	15	9.465345465845742	Ctrl
90.14515	9.6166	15	10.66790614913836	LMB			99.74188000000001	8.49905	15	8.521044520115321	Ctrl
86.57924	10.45877	15	12.079997468215243	LMB			96.47108	8.45935	15	8.768793715173501	Ctrl
93.81438	9.15514	15	9.758781116498344	LMB			107.2482	8.77207	15	8.179223520767714	Ctrl
120.77545	10.22507	15	8.466182489901714	LMB			108.94088	9.25808	15	8.4982607080097	Ctrl
112.74699	13.16598	15	11.677455868223179	LMB			96.70815999999999	8.31676	15	8.59985341464464	Ctrl
91.15876999999999	8.77571	15	9.626841169533114	LMB			96.58431	8.93403	15	9.249980664561356	Ctrl
153.25727	14.12091	15	9.213859805802361	LMB			97.409	8.672989999999999	15	8.903684464474534	Ctrl
117.99947	11.196860000000001	15	9.488907026446816	LMB			108.94088	9.25808	15	8.4982607080097	Ctrl
100.49164	10.492289999999999	15	10.44095807372633	LMB			96.70815999999999	8.31676	15	8.59985341464464	Ctrl
98.5817	9.29125	15	9.424923692734048	LMB			87.52483000000001	7.81763	15	8.931899667785702	Ctrl
137.5956	13.21013	15	9.60069217329624	LMB			81.66401	6.8766	15	8.420600457900608	Ctrl
113.0614	10.74308	15	9.501987415687404	LMB			123.7517	9.70812	15	7.844837687078237	Ctrl
92.95474	9.983410000000001	15	10.740076299498014	LMB			97.17654	8.067689999999999	15	8.302096370173293	Ctrl
96.94393000000001	8.75521	15	9.031210102581976	LMB			128.85991	11.05	15	8.575203878382345	Ctrl
97.4823	8.9521	15	9.183308149274279	LMB			63.36744	6.12474	15	9.66543701307801	Ctrl
104.42284000000001	9.353819999999999	15	8.957638003333368	LMB			85.60254	7.782610000000001	15	9.091564339095546	Ctrl
97.58325	11.04457	15	11.318100186251227	LMB			101.60392	8.700389999999999	15	8.563045599028067	Ctrl
105.90002	11.37315	15	10.739516385360456	LMB			128.02178	10.96343	15	8.563722516590536	Ctrl
112.2216	11.52378	15	10.268771787249513	LMB			117.28361000000001	9.39376	15	8.009439682151665	Ctrl
114.41408	12.25062	15	10.70726609871792	LMB			112.57829	10.52829	15	9.351971858872613	Ctrl
95.6715	10.65617	15	11.138290922584051	LMB			76.53671	7.55748	15	9.874320440478824	Ctrl
116.77216000000001	11.57272	15	9.910512916777423	LMB			99.27429000000001	8.73813	30	8.802007045328654	Ctrl
97.12799	10.36001	15	10.666348598380344	LMB			108.37625	9.00653	30	8.310427792066989	Ctrl
115.87487	11.61001	15	10.019437346510076	LMB			106.52071000000001	9.81608	30	9.215184540170638	Ctrl
104.86708	9.939039999999999	15	9.47775031020221	LMB			107.15203000000001	9.67849	30	9.03248403226705	Ctrl
110.10231	12.21462	15	11.093881681501506	LMB			133.66676	11.14981	30	8.341497916161055	Ctrl
104.62654	9.72377	15	9.293789128456316	LMB			93.93234	8.48175	30	9.029637715828223	Ctrl
104.66396999999999	10.1179	15	9.667032504117703	LMB			100.35408000000001	9.59861	30	9.564743157428179	Ctrl
112.85295	11.26195	15	9.97931378842999	LMB			97.51604	8.15382	30	8.361516730991127	Ctrl
77.00834	7.84307	15	10.184702072528767	LMB			94.60331	9.491430000000001	30	10.032873056978664	Ctrl
90.5735	9.207989999999999	15	10.166317962759527	LMB			97.12934	9.44851	30	9.727760942265233	Ctrl
94.81987	9.65578	15	10.18328753245496	LMB			108.28723000000001	9.96108	30	9.198757785197756	Ctrl
93.24355	8.98579	15	9.636902498885982	LMB			111.18538999999998	10.20082	30	9.174604685022016	Ctrl
96.98179	9.87812	15	10.185541017545663	LMB			102.37255	8.87164	30	8.666034010093526	Ctrl
94.91765	9.84272	15	10.369746827908191	LMB			103.37031999999999	10.067680000000001	30	9.739430041427754	Ctrl
98.53569	9.56652	15	9.70868524896918	LMB			111.35063000000001	7.903630000000001	30	7.097966127358237	Ctrl
108.83332	11.45267	15	10.523128394870248	LMB			103.88116	9.856710000000001	30	9.488448145939072	Ctrl
109.1724	9.989339999999999	30	9.150059905250776	LMB			106.73175	9.16258	30	8.584680753384069	Ctrl
117.67421999999999	10.79234	30	9.171371605437452	LMB			104.50887	9.31746	30	8.915472916318013	Ctrl
88.71694000000001	9.53757	30	10.750562406683548	LMB			109.24004	8.50683	30	7.787282025894536	Ctrl
91.80969	10.8464	30	11.814003510958374	LMB			116.82898999999999	10.17638	30	8.710492147539751	Ctrl
93.29325	9.46385	30	10.144195855541533	LMB			98.68456	8.463410000000001	30	8.576225095394863	Ctrl
109.65566000000001	10.84956	30	9.894208835184614	LMB			95.70759	9.31731	30	9.735184012051711	Ctrl
111.5232	10.80133	30	9.685276247453444	LMB			100.56331	8.52407	30	8.476322030370719	Ctrl
148.45278000000002	14.19467	30	9.561740777100974	LMB			116.82898999999999	10.17638	30	8.710492147539751	Ctrl
97.04466	10.51207	30	10.832198288911517	LMB			98.68456	8.463410000000001	30	8.576225095394863	Ctrl
90.04174	11.36031	30	12.616715314475263	LMB			93.73147	8.67136	30	9.251279212840682	Ctrl
101.72086	9.98535	30	9.816423101416957	LMB			83.90035	7.41875	30	8.842334984299827	Ctrl
127.94695	11.39688	30	8.907504242969448	LMB			128.4558	10.23984	30	7.971489025797199	Ctrl
117.00171999999999	13.57674	30	11.603880695087218	LMB			100.52095	8.01595	30	7.974407325040203	Ctrl
95.68982	9.218739999999999	30	9.633981963807644	LMB			135.55637	11.806410000000001	30	8.709594392355005	Ctrl
160.20349	14.99439	30	9.359590106307921	LMB			68.53608	6.46288	30	9.429894443919174	Ctrl
126.96653	12.6604	30	9.971446805705408	LMB			89.76058	8.15944	30	9.090226466896715	Ctrl
103.89901	10.90211	30	10.492987373026942	LMB			103.3458	9.00114	30	8.709729858397727	Ctrl
102.99098000000001	10.41815	30	10.115594588963033	LMB			132.4887	11.359169999999999	30	8.573689680704845	Ctrl
145.35432	14.31393	30	9.847612372305138	LMB			117.31358999999999	9.65813	30	8.232746095315981	Ctrl
120.0614	12.151	30	10.120654931560017	LMB			118.28741000000001	11.15484	30	9.430285099656842	Ctrl
95.31754000000001	10.36683	30	10.87609898451009	LMB			82.15581	8.00737	30	9.746565702413498	Ctrl
101.72509000000001	9.525780000000001	30	9.364238458771577	LMB			117.79847	9.11466	45	7.73750287249062	Ctrl
105.98363	9.86144	30	9.304682241965104	LMB			112.18491999999999	9.25008	45	8.245386278298367	Ctrl
116.64837	11.30195	30	9.688905211448732	LMB			114.388	10.47584	45	9.158163443717873	Ctrl
100.47504	12.35121	30	12.292814215351395	LMB			112.29475	9.68131	45	8.6213380411818	Ctrl
110.01063	11.54464	30	10.49411315979192	LMB			141.31499	11.46649	45	8.114135662465817	Ctrl
117.35179	11.64289	30	9.921356972910257	LMB			97.00106	8.606010000000001	45	8.872078305123678	Ctrl
119.01651000000001	12.67857	30	10.65278254252288	LMB			107.28596999999999	10.04091	45	9.359014976515569	Ctrl
99.83779	11.19931	30	11.217505916346907	LMB			102.28050999999999	8.39499	45	8.207810070559876	Ctrl
112.17618	11.875639999999999	30	10.586596904975725	LMB			101.04649	9.774980000000001	45	9.673745223609451	Ctrl
101.71258	10.880339999999999	30	10.697142870626228	LMB			99.83506	9.310319999999999	45	9.325701812569651	Ctrl
122.48906000000001	13.04627	30	10.650967523140432	LMB			111.38216000000001	9.82375	45	8.819859481985265	Ctrl
107.96812	11.179910000000001	30	10.354825109486024	LMB			114.9043	10.96082	45	9.539086004614274	Ctrl
117.35436000000001	13.03204	30	11.10486223093884	LMB			106.85665	9.32192	45	8.723762161737243	Ctrl
109.34602	11.16357	30	10.209397653430825	LMB			110.11001999999999	10.25683	45	9.315074141299766	Ctrl
109.2102	11.25962	30	10.310044299891402	LMB			116.21508	8.44665	45	7.26811873295617	Ctrl
116.23701000000001	11.861360000000001	30	10.204460696296302	LMB			103.99104	9.98395	45	9.600779067119628	Ctrl
82.05493	8.04916	30	9.809477626755639	LMB			109.41264	9.72257	45	8.886148803282692	Ctrl
97.82892	10.15916	30	10.384618372563041	LMB			108.64218999999999	9.71894	45	8.945824821830268	Ctrl
99.92778	10.57535	30	10.582993037571736	LMB			113.55753	9.34908	45	8.23290186040503	Ctrl
99.15105	9.59302	30	9.675157247452246	LMB			123.93495	10.64257	45	8.587222571195614	Ctrl
102.21836	10.756839999999999	30	10.523393253423357	LMB			105.22483999999999	9.48816	45	9.017034380855321	Ctrl
96.21706999999999	10.062660000000001	30	10.458289781636461	LMB			97.6111	8.98001	45	9.199783631164898	Ctrl
101.01434	10.6798	30	10.572558312017877	LMB			104.50374000000001	9.36711	45	8.963420830680318	Ctrl
113.44747	12.794310000000001	30	11.277739380173045	LMB			123.93495	10.64257	45	8.587222571195614	Ctrl
110.53497	10.46835	45	9.47062273595406	LMB			105.22483999999999	9.48816	45	9.017034380855321	Ctrl
125.138	11.9352	45	9.5376304559766	LMB			97.96378	9.19888	45	9.390082742825971	Ctrl
93.14425	10.453339999999999	45	11.222743218180401	LMB			88.99998000000001	7.88155	45	8.855676147342953	Ctrl
95.89350999999999	11.65402	45	12.153085229646928	LMB			135.53202	10.856860000000001	45	8.010549831692911	Ctrl
96.84486	9.68701	45	10.002606230211908	LMB			108.01543999999998	9.4593	45	8.757359133101714	Ctrl
114.16054	11.71067	45	10.25807165943679	LMB			138.83357	11.84357	45	8.530768170839371	Ctrl
115.36333	11.68019	45	10.124699070319831	LMB			73.17684	6.978089999999999	45	9.535926940818978	Ctrl
151.74868999999998	14.617120000000002	45	9.632452181300547	LMB			97.38461	8.725769999999999	45	8.960111869832408	Ctrl
99.71949000000001	10.550889999999999	45	10.580569555660583	LMB			107.96463999999999	9.90723	45	9.176365521155818	Ctrl
96.75567	11.897689999999999	45	12.296633365259112	LMB			134.34853	11.621889999999999	45	8.65055241021245	Ctrl
106.74146	10.59459	45	9.92546851054876	LMB			121.447	9.94782	45	8.191079236210035	Ctrl
130.84673	11.69668	45	8.939222248809735	LMB			121.73167	10.63568	45	8.736986849847701	Ctrl
124.97278	15.15629	45	12.127672922055508	LMB			81.86345	7.70598	45	9.41321187904981	Ctrl
95.62604	9.4083	45	9.83863809481183	LMB			113.08253	10.353539999999999	60	9.155737849162021	Ctrl
169.69075	16.194670000000002	45	9.543637469926912	LMB			120.6091	9.19488	60	7.62370335240044	Ctrl
132.37411	13.25755	45	10.015213700020345	LMB			118.84831000000001	10.20251	60	8.584480502920066	Ctrl
109.3361	11.99724	45	10.972807700292948	LMB			114.97383	10.318	60	8.974216132488584	Ctrl
108.32874	11.019789999999999	45	10.172545162068717	LMB			148.01641	12.00859	60	8.113012604480813	Ctrl
153.32397	15.7596	45	10.278627666632948	LMB			102.44918	9.26336	60	9.04190741204566	Ctrl
128.17278000000002	13.47531	45	10.513394497646066	LMB			113.09835	10.98757	60	9.715057735148214	Ctrl
98.43369	11.575610000000001	45	11.759805001722482	LMB			105.57846	8.457460000000001	60	8.010592312106088	Ctrl
110.16006999999999	10.29138	45	9.34220539257101	LMB			105.79312	10.49162	60	9.917109921703794	Ctrl
109.31765	10.80712	45	9.885979071083215	LMB			104.50572	9.92964	60	9.501527763265015	Ctrl
124.96016999999999	12.50155	45	10.004427810877658	LMB			115.57221000000001	10.12953	60	8.764676214117562	Ctrl
107.82675	12.91114	45	11.973967498788566	LMB			121.50858000000001	11.9028	60	9.795851453452915	Ctrl
112.64536000000001	12.42977	45	11.034426983943233	LMB			114.2972	10.11415	60	8.848991926311406	Ctrl
119.50693000000001	12.986419999999999	45	10.866666895384224	LMB			115.01975	11.145760000000001	60	9.69030101352159	Ctrl
124.97223999999999	13.116829999999998	45	10.495794906132753	LMB			118.2303	9.14965	60	7.73883682947603	Ctrl
102.08891	11.528410000000001	45	11.292519432326197	LMB			107.02933999999999	10.201939999999999	60	9.531909661406862	Ctrl
115.28346	12.45161	45	10.800864234990865	LMB			116.62522	9.95571	60	8.536498366305333	Ctrl
106.002	11.56712	45	10.91217146846286	LMB			114.92396000000001	10.26426	60	8.931349041574967	Ctrl
124.11028999999999	13.51259	45	10.887566212277806	LMB			113.13115	9.92334	60	8.771536398242215	Ctrl
113.449	12.48595	45	11.005782333912155	LMB			130.63845	11.18746	60	8.563680907114252	Ctrl
122.36312	14.530439999999999	45	11.874852488233381	LMB			112.12029	9.98892	60	8.90911002816707	Ctrl
114.08685	12.1268	45	10.629445900206727	LMB			106.18279	10.261560000000001	60	9.664051961716208	Ctrl
115.60484	12.35187	45	10.684561303834684	LMB			106.79302	9.44012	60	8.839641392293242	Ctrl
119.93768999999999	12.88471	45	10.742836551212552	LMB			130.63845	11.18746	60	8.563680907114252	Ctrl
86.70446	8.78612	45	10.133411822183081	LMB			112.12029	9.98892	60	8.90911002816707	Ctrl
99.29975999999999	11.58487	45	11.666563947385171	LMB			101.16438000000001	9.14564	60	9.04037567373022	Ctrl
102.98892	11.04543	45	10.724872151295498	LMB			92.85809	8.13749	60	8.763361382944662	Ctrl
100.78057	10.06127	45	9.983343019393521	LMB			141.14963	11.584430000000001	60	8.207198276042242	Ctrl
108.9121	11.6045	45	10.654922639449612	LMB			113.01122	9.58732	60	8.483511637163106	Ctrl
97.60750999999999	10.56455	45	10.823501183464266	LMB			148.30657	13.06903	60	8.812171975927972	Ctrl
105.29771000000001	11.25676	45	10.690412925409298	LMB			74.20546999999999	7.34262	60	9.894984830633108	Ctrl
121.28855	13.69428	45	11.290661814326247	LMB			104.77071	9.40893	60	8.980496552901092	Ctrl
113.76988999999999	10.632719999999999	60	9.345811971867073	LMB			108.16094	9.613610000000001	60	8.888245608812202	Ctrl
128.36113999999998	12.61497	60	9.827717329403589	LMB			135.37592	11.695780000000001	60	8.639483299541013	Ctrl
95.05735	10.65959	60	11.213851427585558	LMB			127.49155	10.72255	60	8.410400532427444	Ctrl
98.50131	11.89398	60	12.074946008332276	LMB			121.20593000000001	10.46241	60	8.631929147361024	Ctrl
101.13155	9.84365	60	9.73351046236313	LMB			85.74469	8.00919	60	9.340741683245923	Ctrl
117.22783000000001	11.897210000000001	60	10.148793166264358	LMB
119.60275	12.106160000000001	60	10.121974620148784	LMB
154.42577	15.2832	60	9.89679377995007	LMB
101.43056999999999	10.83177	60	10.678999437743476	LMB
99.10911999999999	12.6916	60	12.805683271125805	LMB
115.55632	11.06128	60	9.572198214688733	LMB
135.46024	12.52405	60	9.245554267436702	LMB
127.979	15.95969	60	12.470553762726698	LMB
99.90748	10.87313	60	10.883199135840478	LMB
176.55825	17.94187	60	10.162011687360971	LMB
140.73394	14.14274	60	10.049274538892323	LMB
115.18398	12.64029	60	10.974000030212535	LMB
112.44953000000001	12.36076	60	10.992273600432123	LMB
158.87618	16.822470000000003	60	10.588415456615335	LMB
137.69766	14.653979999999999	60	10.642141631164973	LMB
109.3266	13.76641	60	12.592004141718485	LMB
113.34746000000001	10.74526	60	9.47993011929866	LMB
114.66707	11.79336	60	10.284870800309104	LMB
129.83013	12.92557	60	9.955755262665146	LMB
111.43937	13.55134	60	12.160280518455911	LMB
116.22308000000001	12.32638	60	10.605793616896058	LMB
124.34998999999999	12.968589999999999	60	10.429104176043761	LMB
124.8594	13.70765	60	10.978468581460426	LMB
102.914	11.14526	60	10.829683036321589	LMB
119.87964	12.95994	60	10.810793225605282	LMB
105.08986000000002	11.57987	60	11.019017438980315	LMB
124.17908	13.388370000000002	60	10.781502005007608	LMB
117.46441999999999	12.90219	60	10.98391325645672	LMB
127.52228999999998	15.216320000000001	60	11.932282583695763	LMB
117.64538	12.89175	60	10.958143872713062	LMB
117.73218999999999	12.92304	60	10.976641137823057	LMB
124.89633	13.468929999999999	60	10.784087891133389	LMB
89.14451	9.01332	60	10.110908680747698	LMB
104.40178	11.82024	60	11.321875929701582	LMB
109.32888	11.97146	60	10.949952107805366	LMB
105.09771	11.53912	60	10.979420959790655	LMB
110.34969	12.04	60	10.910769210135525	LMB
103.26142	11.41716	60	11.056559167983552	LMB
110.72628	12.17357	60	10.994291508754742	LMB
124.6822	14.405170000000002	60	11.553509642916152	LMB
