# Supplementary material for: Control of nuclear size by osmotic forces in Schizosaccharomyces pombe
Source: eLife. 2022 Jul 20;11:e76075. doi: 10.7554/eLife.76075 (PMC9410708; doi:10.7554/eLife.76075)
Supplement: Figure 5—figure supplement 2—source data 2. — Related to Figure 5—figure supplement 2. [file elife-76075-fig5-figsupp2-data2.xlsx]

## Sheet: Sheet1
	Before shock				After shock							Before shock				After shock
Protoplasts	Cell volume	Nuclear volume	N/C ratio	Conditon (paired)	Cell volume	Nuclear volume	N/C ratio	Conditon (paired)			Protoplasts	Cell volume	Nuclear volume	N/C ratio	Conditon (paired)	Cell volume	Nuclear volume	N/C ratio	Conditon (paired)
LMB 15 min	71.27233000000001	6.61353	9.279239222290052	0.4M	101.71951999999999	7.8825	7.749250094770405	0.2M			LMB 60 min	122.04031	14.15218	11.59631600411372	0.4M	192.52497	20.80684	10.80734618475723	0.2M
	65.62402	5.48796	8.362730597729307	0.4M	84.91136	6.52347	7.6826822700755235	0.2M				88.02599000000001	8.09633	9.19765855516081	0.4M	116.52944	9.570839999999999	8.213237787807099	0.2M
	66.07746999999999	5.98678	9.060243983312317	0.4M	81.04594	6.709980000000001	8.279230273595445	0.2M				92.98533	9.706760000000001	10.439023015781093	0.4M	110.87621000000001	11.257	10.152764060026943	0.2M
	75.80967	6.236680000000001	8.226760517490712	0.4M	103.89101	8.22381	7.915805227035526	0.2M				95.03898000000001	10.3587	10.89942253168121	0.4M	128.46182	13.06735	10.172166329264213	0.2M
	79.50823000000001	6.46018	8.12517144451587	0.4M	103.60861	8.614939999999999	8.314888115958702	0.2M				97.58762	10.93394	11.20422856915662	0.4M	121.01952	11.67711	9.648947541685837	0.2M
	92.28596999999999	7.36056	7.975816909114139	0.4M	112.88293999999999	7.9103699999999995	7.007586797438126	0.2M				70.80569	7.2191399999999994	10.19570602306114	0.4M	116.49853	11.978660000000001	10.28224132956871	0.2M
	66.74628	6.4688099999999995	9.69164124202877	0.4M	80.77139	7.3102800000000006	9.050580904946665	0.2M				108.03355	10.51249	9.730764193160365	0.4M	150.76198	14.636439999999999	9.708309747590208	0.2M
	61.28406999999999	4.8482400000000005	7.9110933722254435	0.4M	80.02951	6.581589999999999	8.22395388900919	0.2M				84.09675	8.87796	10.556840781599766	0.4M	146.37973	13.613470000000001	9.300105964124953	0.2M
	59.17429	5.69681	9.627170854098969	0.4M	99.26787	7.974819999999999	8.03363666410894	0.2M
	65.19546	5.93734	9.106983829855638	0.4M	80.86404	6.850239999999999	8.471305663184772	0.2M				117.42865	11.176260000000001	9.517489982214734	0.4M	132.8055	12.66432	9.53599060279883	0.3M
	67.29871	6.14565	9.131898664922403	0.4M	89.89412	7.763260000000001	8.63600422363554	0.2M				71.80363	7.8185199999999995	10.888753117356323	0.4M	82.13566	8.66801	10.553284651270838	0.3M
	71.01104000000001	5.83369	8.215187384947466	0.4M	102.77976	8.343169999999999	8.11752236043361	0.2M				65.45326	6.32861	9.668899608667315	0.4M	72.37413000000001	7.60648	10.509943262875836	0.3M
	84.73033000000001	6.53528	7.71303498994988	0.4M	103.73395	7.92373	7.638511789052668	0.2M				104.97868999999999	9.40809	8.961904554152849	0.4M	117.29471000000001	10.54377	8.989126619606289	0.3M
	80.14034000000001	6.22938	7.773089058519092	0.4M	98.98340999999999	7.96696	8.048783124363974	0.2M				68.88519000000001	6.341559999999999	9.205984624561534	0.4M	80.71096	7.674810000000001	9.509005963997952	0.3M
	47.224090000000004	4.7826	10.127458252768873	0.4M	76.63464	8.42587	10.994858199894981	0.2M				88.35504	8.82036	9.982860060954078	0.4M	85.52644000000001	10.208639999999999	11.936238664908768	0.3M
	49.48834	4.95728	10.017066646406002	0.4M	78.10318000000001	6.84019	8.757889243434134	0.2M				68.26486	7.25046	10.621072100638601	0.4M	68.06756	8.13269	11.94796757809447	0.3M
	62.81204	5.70351	9.080281423752515	0.4M	79.49684	7.102130000000001	8.933851961914462	0.2M				84.0075	9.130519999999999	10.868696247358866	0.4M	95.0353	10.87735	11.445589165289109	0.3M
	77.27219000000001	7.1680399999999995	9.276351556750233	0.4M	95.23333000000001	9.209439999999999	9.670395858256766	0.2M				131.24857	10.86496	8.278154954373978	0.4M	167.18707	13.07446	7.820257870420242	0.3M
	61.02274	5.44489	8.922722906247737	0.4M	100.05329	8.81821	8.813513278773742	0.2M				92.82028000000001	8.749039999999999	9.42578496854351	0.4M	142.54197	12.47434	8.751345305526506	0.3M
	74.86209000000001	6.619739999999999	8.842579735617852	0.4M	95.21388	8.29624	8.713267435378118	0.2M				83.38374	7.52842	9.028642754570615	0.4M	103.48581	9.49094	9.171247729519632	0.3M
	79.53244000000001	5.94042	7.46917861441193	0.4M	97.39985	7.90175	8.112692165337009	0.2M				107.67238	8.52237	7.915093917307299	0.4M	120.09338000000001	10.32822	8.600157643993365	0.3M
	81.38502	8.08881	9.938942080495895	0.4M	105.37611000000001	9.63113	9.139766119664126	0.2M				102.06485	10.32718	10.118253247812541	0.4M	115.35421000000001	12.00937	10.410864068160148	0.3M
	74.84579000000001	7.381760000000001	9.86262553979322	0.4M	101.59751999999999	8.09801	7.970676843293026	0.2M				75.22369	7.4165600000000005	9.85934085392514	0.4M	87.1874	8.92753	10.239472676097694	0.3M
	53.04165	4.91301	9.262551221540054	0.4M	64.6436	6.14015	9.498465431999454	0.2M				76.64105	7.90523	10.314615992343528	0.4M	97.47107	10.46285	10.734313268542142	0.3M
	78.12204	6.142930000000001	7.863248322752453	0.4M	103.79991	7.9531	7.661952693407923	0.2M				77.29498000000001	7.97168	10.313321770702313	0.4M	89.18336	8.77544	9.839772800665953	0.3M
	91.50281	8.34238	9.11707520238996	0.4M	107.9408	10.64553	9.8623782666054	0.2M				72.88707	8.55204	11.733274502596963	0.4M	87.45358	10.047310000000001	11.488734938009399	0.3M
	80.86374	6.7318	8.324868476278736	0.4M	120.16065	9.56209	7.957754888975717	0.2M				85.57148000000001	9.04101	10.565447740298518	0.4M	100.28650999999999	10.41045	10.380708232842085	0.3M
	71.4923	6.71851	9.397529524158546	0.4M	108.62862	9.75362	8.978867631753031	0.2M				101.57341	10.632710000000001	10.468005356913784	0.4M	150.12849	15.36969	10.23769039440815	0.3M
	89.07772	7.46288	8.377942318236254	0.4M	120.62631999999999	9.12167	7.561923467448896	0.2M				119.17801000000001	11.21698	9.411954436896536	0.4M	136.60589	13.265320000000001	9.710650104472071	0.3M
	70.81269	3.08813	4.36098388579787	0.4M	126.67323999999999	11.90643	9.399325382377526	0.2M				85.51135	7.97985	9.33191909611999	0.4M	98.54567	9.62532	9.767369789053136	0.3M
	86.17073	8.59913	9.979177384246368	0.4M	117.36748999999999	10.376560000000001	8.841085380627977	0.2M
	68.22669	5.74397	8.418948654844606	0.4M	95.92344	9.48827	9.891503057021307	0.2M				81.36731999999999	7.94269	9.761523422425613	0.4M	77.44138000000001	7.9761	10.29953236887049	0.5M
	53.72643000000001	6.33932	11.799257832690538	0.4M	102.63186	10.69629	10.421997613606534	0.2M				70.00475	7.057980000000001	10.082144425913956	0.4M	66.53528	6.59306	9.90911889151139	0.5M
												65.50412	5.83093	8.901623287206974	0.4M	62.377959999999995	5.89842	9.45593603894709	0.5M
	93.63814	8.408610000000001	8.979898575516344	0.4M	102.65156999999999	8.40536	8.188243004953554	0.3M				84.1968	7.11295	8.448005149839425	0.4M	79.89645	6.48966	8.12258867571713	0.5M
	60.57317	6.6055600000000005	10.905092138978365	0.4M	68.78002	6.41021	9.319872253599229	0.3M				80.48562	7.17121	8.909927015533956	0.4M	77.4474	6.746160000000001	8.710634572626066	0.5M
	62.85932	6.336	10.079650877546879	0.4M	67.45071999999999	7.79666	11.559046367481328	0.3M				73.3134	6.8601399999999995	9.357279842429895	0.4M	78.09804	7.05898	9.038613517061377	0.5M
	62.43255	6.21661	9.957321941839634	0.4M	71.82243000000001	7.11177	9.901878842027482	0.3M				69.75761999999999	7.85572	11.261450720365747	0.4M	66.21871	7.48481	11.303164921213355	0.5M
	87.79417	7.48825	8.52932489708599	0.4M	104.01913	8.40691	8.082080671122705	0.3M				93.77258	8.89219	9.482718722253349	0.4M	87.37534000000001	7.92895	9.074585575289321	0.5M
	59.79756999999999	5.98793	10.013667779476659	0.4M	71.17348	7.05565	9.913313217226417	0.3M				81.3792	8.054	9.89687782627502	0.4M	76.77111	7.5807199999999995	9.874443654650818	0.5M
	84.32967	6.97519	8.271335580940848	0.4M	99.59145	8.10634	8.13959431256398	0.3M				89.9322	9.102260000000001	10.121246894883036	0.4M	81.96294	8.29522	10.120696012124505	0.5M
	76.65078000000001	7.03942	9.183755207709561	0.4M	90.55939000000001	8.03073	8.86791529845773	0.3M				73.48054	6.598560000000001	8.980010217671238	0.4M	67.74789	6.0400599999999995	8.915495375575535	0.5M
	76.48445	6.73158	8.801239990612473	0.4M	92.46751	8.37071	9.052595879352651	0.3M				122.16791	12.35613	10.114055319436995	0.4M	108.01753000000001	11.60352	10.74225637264618	0.5M
	75.42201999999999	7.667960000000001	10.166739103513803	0.4M	91.55045	8.95685	9.783512806327002	0.3M				78.48438	8.39407	10.695210945158767	0.4M	73.51746	7.47475	10.167312635665052	0.5M
	71.4464	5.9448300000000005	8.320685156984817	0.4M	82.34339	7.142110000000001	8.673568090893514	0.3M				109.35377	10.9083	9.975239079548881	0.4M	103.19274	9.86042	9.555342749887249	0.5M
	59.98486	5.25629	8.7626944532337	0.4M	68.46866999999999	7.40475	10.814800404330917	0.3M				80.58726999999999	8.04237	9.979702749578191	0.4M	74.45874	7.29846	9.802019212250974	0.5M
	90.79758000000001	7.99976	8.81054318848586	0.4M	100.69666	9.77403	9.706409328770189	0.3M				97.8291	10.83361	11.074015809201967	0.4M	83.4653	9.64392	11.554406441958514	0.5M
	58.38268000000001	5.77425	9.8903476167932	0.4M	65.85109	6.909439999999999	10.492521839805535	0.3M
	67.08691999999999	6.24101	9.302871558270972	0.4M	69.67339	6.14421	8.818589134244796	0.3M				111.55153	11.05684	9.911867636418792	0.4M	99.80749	9.336960000000001	9.35496925130569	0.6M
	72.17482	6.63985	9.199676563100539	0.4M	77.20448	6.91356	8.954868940248026	0.3M				72.13445	7.6125300000000005	10.553251601696555	0.4M	65.73455	6.11137	9.297043944166349	0.6M
	79.48611	7.20857	9.068968150535987	0.4M	86.1364	7.63443	8.863186759604535	0.3M				72.8828	7.5678600000000005	10.38360216676637	0.4M	63.81041	6.49447	10.177759396938525	0.6M
	87.45104	8.7528	10.008800352745947	0.4M	95.38084	8.986080000000001	9.421263222257217	0.3M				74.7086	8.252939999999999	11.04684065823747	0.4M	64.74084	7.211119999999999	11.138440588660881	0.6M
	70.86041999999999	6.16324	8.697718698252142	0.4M	77.13593	6.67195	8.649600776188217	0.3M				84.68356999999999	8.34596	9.855465469866234	0.4M	73.86417	7.05893	9.556636187748403	0.6M
	60.976459999999996	5.47954	8.986320294749811	0.4M	65.65505999999999	5.66068	8.621848795812541	0.3M				119.76211	11.81402	9.864572359321324	0.4M	104.98127	10.87715	10.361038688139324	0.6M
	63.7606	4.97255	7.7987816927695155	0.4M	72.22524	6.1256699999999995	8.481342533441218	0.3M				109.46647	11.047130000000001	10.09179340486635	0.4M	97.52325	10.00555	10.259656030741386	0.6M
	66.44171999999999	5.80376	8.73511402173213	0.4M	70.02386	6.45822	9.22288488523769	0.3M				51.69042	6.15726	11.911801064878173	0.4M	44.18	5.49558	12.439067451335447	0.6M
	43.53533	3.87966	8.911520826877847	0.4M	50.11152	4.3388800000000005	8.658448197141098	0.3M				78.04523	8.571760000000001	10.983067126588006	0.4M	68.37275	7.8368199999999995	11.461905510601811	0.6M
	78.62912	6.97677	8.873010406322747	0.4M	84.78395	7.28495	8.59236919251816	0.3M				84.40342	8.22203	9.741346973854851	0.4M	73.19948000000001	7.64355	10.442082375448567	0.6M
	53.69511	4.4571	8.300755878887294	0.4M	59.86714	5.59274	9.341919456984249	0.3M				73.8162	7.94505	10.763287733586937	0.4M	65.59579000000001	6.96197	10.613440283286472	0.6M
	57.29186	4.90985	8.569891080513008	0.4M	62589	4.997330000000001	7.984358273818085	0.3M				86.05539	8.62011	10.016932117790645	0.4M	73.7537	7.8314699999999995	10.618409652668273	0.6M
	78.30064	6.46485	8.2564459243245	0.4M	87.64858000000001	7.08591	8.08445499059996	0.3M				109.78674	10.82678	9.861646315392916	0.4M	95.75421999999999	9.42177	9.839535009527518	0.6M
	53.773959999999995	4.2365	7.878348553835352	0.4M	61.09843000000001	5.371169999999999	8.79101148752922	0.3M				99.23794000000001	9.66372	9.737928860675664	0.4M	86.85136999999999	8.36726	9.633998864957457	0.6M
	75.60726	6.0121400000000005	7.951802512086803	0.4M	84.77854	6.71771	7.923833083230733	0.3M				76.36125	7.73615	10.13098921246051	0.4M	66.17851999999999	6.865139999999999	10.37366807235943	0.6M
	71.83856	6.22328	8.662868520749859	0.4M	79.75804000000001	7.11003	8.91449940344572	0.3M				87.95315	8.827169999999999	10.036218145683241	0.4M	78.45130999999999	7.687819999999999	9.799479447825664	0.6M
	63.80968000000001	6.26117	9.812257325220875	0.4M	74.64744	6.92661	9.279099189469859	0.3M				104.65231	10.16905	9.716985702465623	0.4M	90.57399000000001	8.99506	9.931173397572525	0.6M
	59.30525	5.77001	9.729340994262733	0.4M	65.87876	5.8429400000000005	8.869231904182776	0.3M				193.99201000000002	15.114120000000002	7.791104386206421	0.4M	164.9875	12.03598	7.295085991362981	0.6M
	91.51096	7.84615	8.574000316464826	0.4M	104.76468	9.071819999999999	8.659235154443271	0.3M				86.72152	8.04894	9.281364072031947	0.4M	73.27037	6.52192	8.901169736143	0.6M
	69.85118	7.2194	10.33540163530523	0.4M	81.65381	8.59111	10.521382896891158	0.3M				68.79859	7.376530000000001	10.72192031842513	0.4M	59.22676	5.91598	9.988694299671298	0.6M
	65.46077	5.81081	8.876782231556398	0.4M	73.4789	6.537	8.896431492578142	0.3M				79.2794	4.42939	5.587062969699569	0.4M	66.97991999999999	3.9196699999999995	5.852007586751372	0.6M
	54.34421999999999	5.86371	10.789942334253764	0.4M	64.17308	6.35323	9.900148161814892	0.3M				70.82826	5.34455	7.545787514757528	0.4M	61.72691	4.81536	7.801070878163187	0.6M
	71.64949	5.64644	7.880642276727999	0.4M	81.81895	6.65402	8.132614754894801	0.3M				70.77179	6.969360000000001	9.847652574563963	0.4M	60.49596999999999	6.5166699999999995	10.772072916592625	0.6M
	67.30208	5.26001	7.815523680694564	0.4M	75.16620999999999	6.43662	8.563182845057641	0.3M				79.89838	8.20058	10.263762544371989	0.4M	68.71861	6.75524	9.830291968944074	0.6M
	85.22248	7.65258	8.979532160997897	0.4M	97.87429	8.6163	8.803435508957461	0.3M				90.48142	9.3486	10.33206596448199	0.4M	76.35159	8.08202	10.585267444987064	0.6M
	79.23689	7.8068	9.852481590329958	0.4M	88.67405	8.47906	9.562053385404186	0.3M				91.61678	8.49152	9.268520460989787	0.4M	76.98523	7.44725	9.673608820808875	0.6M
	61.10933000000001	5.75321	9.414618029685483	0.4M	75.38556	6.6802399999999995	8.861431817976811	0.3M				85.10296	8.0113	9.413656117249037	0.4M	71.69702	7.04778	9.829948301895952	0.6M
	54.72691	5.60445	10.240757243557146	0.4M	59.62848	6.39872	10.730979558761183	0.3M				81.573	8.57976	10.517891949542129	0.4M	68.05921	7.860930000000001	11.550134067086587	0.6M
	57.91862	4.99944	8.631835496080535	0.4M	64.69966	5.5414	8.564805441017775	0.3M				69.6512	6.74741	9.687428213727832	0.4M	60.322790000000005	5.79924	9.613680003859237	0.6M
	61.82846	5.37924	8.700265217668369	0.4M	72.31560999999999	5.47955	7.577271352616675	0.3M				75.7016	8.29601	10.958830460650766	0.4M	64.42751	7.0369600000000005	10.922290804036972	0.6M
	55.01981	5.6986	10.357360376199045	0.4M	66.10795999999999	7.163639999999999	10.836274481923205	0.3M				74.03145	7.79697	10.531969858755975	0.4M	64.0325	6.20977	9.69784094014758	0.6M
	60.77256	5.07906	8.357488971996572	0.4M	67.67976	5.83983	8.628621023478807	0.3M				83.87456	8.03228	9.576539060234712	0.4M	71.47339000000001	6.44947	9.023596054419693	0.6M
	66.57463	5.68547	8.539994889945314	0.4M	80.09235	7.15468	8.933037924346083	0.3M				86.27848	8.28012	9.59697018306303	0.4M	76.50565999999999	7.1813899999999995	9.386743412186759	0.6M
	67.12229	6.4398599999999995	9.594219744290605	0.4M	74.49105	7.71948	10.362963067375208	0.3M				115.40925	9.988719999999999	8.655042815025658	0.4M	101.15986	8.86386	8.762230394545822	0.6M
	72.9447	6.2785400000000005	8.607260020261926	0.4M	83.36242	7.937289999999999	9.521424641942975	0.3M				92.97598	8.81691	9.482997651651534	0.4M	79.78791	7.88545	9.883013604442075	0.6M
	68.30445	6.33831	9.279497895085898	0.4M	76.09518	6.9732199999999995	9.163813003661993	0.3M				74.2025	7.6171	10.265287557696842	0.4M	63.315169999999995	5.8002400000000005	9.16090093416791	0.6M
	53.733619999999995	6.10386	11.359480340241362	0.4M	61.44409	6.67802	10.868449675143696	0.3M				67.99391	6.889010000000001	10.131804451310419	0.4M	60.164	6.07426	10.096170467389136	0.6M
	62.22967	6.21863	9.993030655634202	0.4M	71.69694	7.04568	9.827030274932236	0.3M				70.83579	7.563860000000001	10.678020249368293	0.4M	61.61636	6.41005	10.403162406867267	0.6M
	61.3932	5.56453	9.063756246620148	0.4M	67.82066	6.67945	9.848695073153223	0.3M				66.41224	6.04444	9.101394562207208	0.4M	55.491519999999994	4.83523	8.713457479629321	0.6M
	83.07825	6.45591	7.770878659576966	0.4M	94.84054	8.1532	8.596745653282868	0.3M				70.40436	6.916	9.823255264304654	0.4M	62.21686999999999	5.35644	8.609304839668084	0.6M
	106.09362	8.322510000000001	7.84449621004543	0.4M	116.83912	9.808069999999999	8.394508620058076	0.3M				83.70661	9.402339999999999	11.232494064686168	0.4M	72.40207	7.223739999999999	9.977256175134219	0.6M
	71.98979	7.5361899999999995	10.468415034965375	0.4M	82.83535	7.77302	9.383699109136376	0.3M				82.50598000000001	8.1045	9.82292435045314	0.4M	69.18119	6.99597	10.112532033635153	0.6M
	57.34689	4.119619999999999	7.1836851135257715	0.4M	61.46654	5.49326	8.936992386426827	0.3M				70.62612	6.824730000000001	9.663181270612062	0.4M	63.044309999999996	6.02166	9.551472607123467	0.6M
	58.864819999999995	4.35254	7.394127765955965	0.4M	63.254459999999995	5.182930000000001	8.193777956526702	0.3M				84.02459	8.304219999999999	9.883083035573275	0.4M	69.84685	7.213989999999999	10.328296838010589	0.6M
	62.2929	4.56059	7.321203540050311	0.4M	68.76831	5.900580000000001	8.580376629875012	0.3M				93.17054	7.980519999999999	8.565497205447128	0.4M	77.03626	6.6498800000000005	8.632142837671509	0.6M
	88.06206	7.02185	7.973751692840253	0.4M	100.39902	8.54107	8.50712487034236	0.3M				88.80861999999999	9.2483	10.413741368799561	0.4M	79.80859	7.13312	8.937784767278812	0.6M
	66.85068000000001	5.7633	8.621153891029978	0.4M	75.29588000000001	7.884860000000001	10.471834581121835	0.3M				73.97341999999999	7.459919999999999	10.084595250564325	0.4M	63.42504	6.28416	9.908011094671757	0.6M
	70.09801	5.81416	8.29432961078353	0.4M	78.33814	7.28027	9.293391443810128	0.3M				97.86705	8.37887	8.561482133159219	0.4M	82.18262	7.151510000000001	8.70197372631829	0.6M
	53.68237	4.90182	9.131154231826947	0.4M	62.53294	5.95536	9.523556704674368	0.3M				123.36953000000001	7.54972	6.119598575110078	0.4M	102.66642	8.0823	7.872389044051599	0.6M
	63.93481	5.44623	8.518411175383175	0.4M	74.31809	6.44555	8.672922030154435	0.3M				82.47421	8.43861	10.231816709732655	0.4M	69.4543	7.0807899999999995	10.19489074110602	0.6M
	67.01089	5.8560099999999995	8.738893036639267	0.4M	74.75463	6.243580000000001	8.35209805733772	0.3M				62.167190000000005	6.916010000000001	11.124855410064377	0.4M	53.932030000000005	5.96119	11.053153385845109	0.6M
	71.60289	7.523160000000001	10.5067826172938	0.4M	82.18141999999999	8.2129	9.99362142927197	0.3M				89.4577	9.62187	10.755776193664715	0.4M	77.26550999999999	7.96963	10.314602207375582	0.6M
	49.22429	4.54314	9.22946780948999	0.4M	57.43065	5.749680000000001	10.011518239824904	0.3M				71.40759	7.54927	10.57208344379078	0.4M	61.26319	6.19984	10.120008442263618	0.6M
												84.18477	8.59357	10.207986551486687	0.4M	70.53192	7.14498	10.130136823157516	0.6M
	54.563480000000006	5.4689	10.023004397813335	0.4M	49.321690000000004	5.22055	10.584694076784473	0.5M				84.69685	9.032639999999999	10.66467052788858	0.4M	72.21923000000001	7.4722100000000005	10.346565589248181	0.6M
	74.98069	6.23517	8.31570101582154	0.4M	70.41775	6.1707	8.762989445132797	0.5M				86.82349	3.08115	3.548751610883184	0.4M	73.56962	3.5502800000000003	4.825741929888995	0.6M
	109.76406999999999	8.43005	7.680154352877039	0.4M	96.16756	8.70468	9.051576227992058	0.5M				87.17541	9.57388	10.982317146543963	0.4M	72.57928000000001	7.9648699999999995	10.974027298149002	0.6M
	55.20138000000001	4.74261	8.591469995858798	0.4M	47.28198	4.24835	8.98513556327379	0.5M				84.02127	7.851189999999999	9.344288654527597	0.4M	69.49882	6.997269999999999	10.06818533034086	0.6M
	68.78264	6.734310000000001	9.79071172609833	0.4M	69.04597	5.6395599999999995	8.167833691090152	0.5M				80.39986	8.06671	10.033238863848768	0.4M	68.78448	6.973339999999999	10.13795553880759	0.6M
	58.08342	5.590990000000001	9.625793384755926	0.4M	52.517109999999995	4.73015	9.006874140637214	0.5M				94.96891	9.89589	10.420136442547356	0.4M	73.61659	7.91366	10.749832340780793	0.6M
	65.45464	5.13379	7.843278948597075	0.4M	57.91355	4.73326	8.172975063694073	0.5M				78.74008	7.86315	9.98621032643096	0.4M	71.93398	6.323980000000001	8.79136675045646	0.6M
	67.91579	6.77418	9.974381509807955	0.4M	61.48969	6.21307	10.104246744454233	0.5M				106.43292	9.039439999999999	8.493086537511138	0.4M	88.83440999999999	7.81758	8.800171014812843	0.6M
	57.94951999999999	5.50706	9.503202097273629	0.4M	53.287290000000006	4.84556	9.093275338265466	0.5M
	79.88635	7.41062	9.276453361556761	0.4M	70.48805	6.28289	8.913411564087813	0.5M				73.2265	6.21919	8.493086519224597	0.4M	58.821459999999995	5.0865800000000005	8.647490218705896	0.7M
	80.64634000000001	6.8628100000000005	8.509760021347528	0.4M	66.80808	5.96635	8.93058145062693	0.5M				92.93472	8.48825	9.133561708691866	0.4M	76.83261999999999	6.8543	8.921080655586131	0.7M
	73.01138	8.0275	10.99486134901162	0.4M	59.459230000000005	5.47419	9.206627801940925	0.5M				108.50493999999999	8.87311	8.1776092406484	0.4M	80.98289	7.12295	8.795623371801131	0.7M
	61.36834	6.303719999999999	10.27194152554884	0.4M	55.005309999999994	4.8425	8.803695497761945	0.5M				72.28511999999999	9.1462	12.652949874054304	0.4M	58.4738	7.1318600000000005	12.196676118193107	0.7M
	76.46531999999999	7.06112	9.23440848740318	0.4M	68.97586	6.25629	9.070260233072847	0.5M				77.10863	6.72612	8.722914672456247	0.4M	59.657219999999995	5.66116	9.489480066285354	0.7M
	74.4136	6.92823	9.310435189266478	0.4M	67.18636	5.62404	8.370806217214328	0.5M				93.85311999999999	10.1335	10.797190333150352	0.4M	75.45116999999999	7.68156	10.18083616198397	0.7M
	72.93616	7.57712	10.388701571346777	0.4M	65.1342	6.26325	9.615916062529362	0.5M				86.74758	7.59273	8.752670679689277	0.4M	69.30346999999999	6.0635	8.74920115832584	0.7M
	69.62488	6.48161	9.309330227930015	0.4M	65.77393000000001	4.85485	7.3811158919650985	0.5M				79.29606	8.60903	10.856819367822311	0.4M	60.3696	5.97814	9.902566854840847	0.7M
	62.44692	5.57005	8.91965528484031	0.4M	57.233990000000006	4.8356900000000005	8.448982850924775	0.5M				58.80763	6.03054	10.25468974008985	0.4M	44.82454	4.82485	10.763858368652528	0.7M
	82.61180999999999	7.30778	8.845926508570628	0.4M	75.21799	6.4328199999999995	8.552235974399208	0.5M				102.18954000000001	9.14285	8.946952887741737	0.4M	77.96535	6.52372	8.36746067323497	0.7M
	49.294290000000004	4.3830800000000005	8.89165864849661	0.4M	41.23707	4.22961	10.256815045297834	0.5M				78.49492	8.28848	10.559256573546417	0.4M	63.86026	6.18339	9.682688419997037	0.7M
	104.71566999999999	8.290339999999999	7.917000387812062	0.4M	93.34283	7.57365	8.113799420908922	0.5M				70.96306	7.39193	10.416588574393495	0.4M	56.0547	5.69986	10.168389091369681	0.7M
	61.01044	5.47118	8.967612756111905	0.4M	53.458980000000004	4.927969999999999	9.218226760031708	0.5M				62.07507	6.8056600000000005	10.963596174760658	0.4M	50.620309999999996	5.37792	10.62403608354038	0.7M
	89.51272	7.79142	8.704260131967837	0.4M	82.00944	6.6342300000000005	8.089593100501602	0.5M				50.797090000000004	5.39968	10.629900256097347	0.4M	41.07427	4.2752099999999995	10.40848687024748	0.7M
	62.47299	5.5092099999999995	8.81854702328158	0.4M	57.308640000000004	4.88693	8.527387842391654	0.5M				79.69736999999999	7.92932	9.949286908714805	0.4M	61.25753	5.85421	9.55671898622096	0.7M
	55.67041	4.95119	8.893755228316085	0.4M	51.05149	3.97696	7.790095842452395	0.5M				84.82133	8.390080000000001	9.891474231776371	0.4M	66.18808	6.46513	9.767816198928871	0.7M
	77.66294	6.89907	8.883348995029031	0.4M	70.26294	6.198259999999999	8.82152098958569	0.5M				67.76945	7.27192	10.730380724648052	0.4M	53.81664	5.0734699999999995	9.427325823388454	0.7M
	65.57704	6.07247	9.260055043655523	0.4M	58.28529	5.36206	9.199679713354774	0.5M				66.78361	5.8836699999999995	8.810050849302696	0.4M	52.488780000000006	4.70606	8.965839937601903	0.7M
	64.23736	5.68155	8.844619392826853	0.4M	56.69269	4.9356	8.705884303602456	0.5M				80.74058000000001	8.30349	10.28415946479453	0.4M	61.10284	6.03164	9.87129239819295	0.7M
	65.56763000000001	5.75721	8.780567484290646	0.4M	55.63057	4.11447	7.396059396838825	0.5M				73.87895999999999	7.59055	10.274305431478734	0.4M	56.19568	5.3015	9.433999197091305	0.7M
	66.78725	5.82477	8.721380203556816	0.4M	58.36192	4.69551	8.045502958093222	0.5M				80.42363	7.73119	9.61308262260731	0.4M	63.86476	5.5023599999999995	8.615643431526243	0.7M
	59.87386	5.9105	9.871586699103748	0.4M	59.4657	5.016719999999999	8.436325478385017	0.5M				67.40801	7.29035	10.815257711954409	0.4M	50.99791	5.16677	10.131336754780735	0.7M
	69.05056	6.3779900000000005	9.236695545988331	0.4M	58.93721	4.60139	7.807274894756641	0.5M				67.94785	6.81955	10.036447069333319	0.4M	53.15413	4.7847	9.001558298480287	0.7M
	63.333569999999995	7.06732	11.15888461679959	0.4M	57.659009999999995	5.71246	9.907315439512402	0.5M				78.8359	8.35038	10.592103343781197	0.4M	61.085719999999995	6.03095	9.872929385132892	0.7M
	76.02489	6.27682	8.25626975586548	0.4M	61.26686	6.93784	11.323968618597394	0.5M				76.73956	7.71311	10.051021924024585	0.4M	60.20286	5.51079	9.153701335783715	0.7M
	72.99537	6.7202399999999995	9.206392131446146	0.4M	59.625719999999994	5.5477300000000005	9.304256619458853	0.5M				61.80639	6.116680000000001	9.896517172415345	0.4M	47.19178	4.0612699999999995	8.60588432985575	0.7M
	74.24788000000001	6.82085	9.186592263644428	0.4M	60.06231999999999	5.38845	8.971431672969011	0.5M				62.90132	6.30426	10.022460577933819	0.4M	48.916059999999995	4.59998	9.403823611304755	0.7M
	100.18457	9.88512	9.866908646710767	0.4M	84.16711	8.89831	10.572193817751376	0.5M				76.34598000000001	7.27458	9.528438825462715	0.4M	59.78377	5.6128599999999995	9.388601622145943	0.7M
	93.86131999999999	7.86424	8.378573836379033	0.4M	82.81147	7.23694	8.739055109153357	0.5M				90.19027	8.66355	9.605858813816614	0.4M	70.80415	6.30029	8.898193114386656	0.7M
	72.32365	6.4265300000000005	8.885793236375655	0.4M	64.91963	5.8544599999999996	9.018011963407679	0.5M				125.19605	11.68967	9.337091705369298	0.4M	67.9089	6.02157	8.86712934534354	0.7M
	70.52156	5.79859	8.222435805447299	0.4M	59.90798	5.22542	8.722410603729253	0.5M				73.85511	7.16028	9.695036673833403	0.4M	57.96173	5.58631	9.637928336507553	0.7M
	74.36355	7.003610000000001	9.418068395067209	0.4M	64.03475	5.95395	9.297998352457064	0.5M				68.85292	6.9728699999999995	10.127195767441671	0.4M	52.966359999999995	5.04283	9.520816608881564	0.7M
	63.14722	6.45571	10.223268736137554	0.4M	57.51621	5.86717	10.2008981468007	0.5M				69.0496	7.46667	10.813487695801278	0.4M	53.09503	5.19245	9.779540570934794	0.7M
	71.06933000000001	6.126930000000001	8.62106058970867	0.4M	62.41737	5.763730000000001	9.23417631982892	0.5M				74.30488000000001	7.32482	9.857791305227865	0.4M	59.13606	5.272069999999999	8.91515261584894	0.7M
	79.73066999999999	6.46191	8.104672894383052	0.4M	69.29862	5.8407800000000005	8.428421806956617	0.5M				73.59088	7.9588	10.814927067049613	0.4M	57.204190000000004	5.98717	10.466313743800933	0.7M
	71.66638	6.23919	8.705881335153247	0.4M	63.133669999999995	5.46638	8.65842267683789	0.5M				76.455	8.211789999999999	10.740684062520435	0.4M	59.27993000000001	6.15074	10.375754492287692	0.7M
	74.17189	5.937530000000001	8.005094652435039	0.4M	63.0921	5.45262	8.642318134917048	0.5M				84.33955999999999	7.57713	8.98407580025317	0.4M	64.58161	5.79293	8.969937417168758	0.7M
	79.9067	5.99562	7.503275695279619	0.4M	68.12433	5.83157	8.56018694055413	0.5M				66.38271999999999	5.88711	8.868437448781853	0.4M	53.64937	4.6472	8.662170683458166	0.7M
	61.63958	5.50407	8.929441115594882	0.4M	59.030640000000005	4.810919999999999	8.149869288220488	0.5M				105.95345	10.97621	10.359464462931598	0.4M	85.1884	8.07439	9.478274037310243	0.7M
	67.36339	6.073180000000001	9.015549840944765	0.4M	57.33753000000001	5.55998	9.696929742177591	0.5M				103.08685	10.00708	9.707426310921326	0.4M	78.4915	7.602639999999999	9.685940515852034	0.7M
	67.79489000000001	5.99819	8.847554734582502	0.4M	58.183969999999995	4.72759	8.12524480539915	0.5M				89.24240999999999	9.80792	10.990200735278217	0.4M	70.36355	6.846430000000001	9.730080418057362	0.7M
	65.34401	6.02886	9.226339185489229	0.4M	57.37327	5.042590000000001	8.789092899881776	0.5M				59.38691	5.84276	9.838464402340517	0.4M	47.979859999999995	3.82816	7.978681054925964	0.7M
	75.36492	7.43049	9.859348354645636	0.4M	62.615019999999994	6.62095	10.574060345265401	0.5M
	58.98523	5.1142	8.670306108834366	0.4M	51.10409	4.53389	8.871873073172813	0.5M				96.54138	10.121739999999999	10.484353963036368	0.4M	69.36014	5.92941	8.548728419521643	0.8M
	62.89173	5.9964699999999995	9.534592226990734	0.4M	53.49866	5.2527800000000004	9.818526295798812	0.5M				83.27651999999999	8.30209	9.96930467315397	0.4M	59.55855	5.55671	9.329827539454874	0.8M
	71.11475	6.90689	9.712317065025188	0.4M	63.9167	5.52174	8.638962900149727	0.5M				76.59046	7.8241	10.215502035109857	0.4M	52.070890000000006	5.21437	10.013982860673208	0.8M
	68.69229	6.1662	8.976553263837907	0.4M	62.259780000000006	5.3609599999999995	8.610631132972198	0.5M				104.25193	10.22449	9.807482700799879	0.4M	70.62498000000001	6.57327	9.307287591444274	0.8M
	82.95743	7.23705	8.723811718853874	0.4M	70.78236	6.18358	8.736046664733982	0.5M				64.51886	6.399290000000001	9.918479650756385	0.4M	45.76354	4.72866	10.33281079217211	0.8M
	92.63235999999999	8.4305	9.101031216304973	0.4M	78.87352	6.94347	8.803296721130234	0.5M				72.72153	7.4141699999999995	10.195288795491512	0.4M	50.28829	5.48813	10.913335887937329	0.8M
	64.70851	6.28566	9.713807349296097	0.4M	58.5876	5.5711900000000005	9.50916234834675	0.5M				79.43299	8.8768	11.175205667066038	0.4M	57.91786	6.1433599999999995	10.60702173733629	0.8M
	71.28927	6.40089	8.978756550600112	0.4M	64.30264	5.99936	9.329881323690598	0.5M				124.57803	12.22463	9.812829758184488	0.4M	87.30761	7.88943	9.036360060709486	0.8M
	80.53774	6.47743	8.042726304462976	0.4M	70.06914	5.89171	8.408423451465223	0.5M				85.94358000000001	8.68816	10.10914369636452	0.4M	59.83772	6.22244	10.3988587800471	0.8M
	86.14486	8.45125	9.810509878360705	0.4M	83.1782	7.403289999999999	8.900517202824778	0.5M				82.58624	8.28837	10.036018106648275	0.4M	54.90595	5.23985	9.54331907561931	0.8M
	61.43042	5.85241	9.526892376773592	0.4M	52.70924	5.98838	11.361157929805097	0.5M				93.34969	8.86315	9.494568219776626	0.4M	63.66903000000001	6.43081	10.100373760994945	0.8M
	77.19319	7.550510000000001	9.781316201597576	0.4M	67.25497	6.68745	9.943428716123135	0.5M				60.249759999999995	7.0216	11.65415430700471	0.4M	42.65047	4.775119999999999	11.195937582868371	0.8M
	81.90028000000001	7.725810000000001	9.433191192997143	0.4M	67.82184000000001	6.81233	10.044448808820285	0.5M				83.38020999999999	8.68319	10.413969933632934	0.4M	59.19615	5.40148	9.124715036366386	0.8M
	74.61068	7.05014	9.449237026120121	0.4M	63.734680000000004	6.0513900000000005	9.494658167264665	0.5M				80.71404	8.05976	9.985573761392692	0.4M	56.23424	5.81124	10.333988687319327	0.8M
	63.730830000000005	6.21055	9.744969585363943	0.4M	54.95126	5.30296	9.650297372617116	0.5M				88.41841	8.32583	9.416398688915578	0.4M	59.848980000000005	6.0785599999999995	10.156497236878554	0.8M
	68.89044	5.83375	8.468156104098044	0.4M	60.881009999999996	5.258	8.636519006501372	0.5M				83.56026	8.83047	10.567786648820864	0.4M	59.25679	5.90263	9.961103191718621	0.8M
	63.598969999999994	6.0597	9.527984494088507	0.4M	54.294290000000004	4.68484	8.628605328479292	0.5M				99.66781	9.33024	9.36133742679808	0.4M	66.26607	5.59826	8.44815453821239	0.8M
	68.9826	6.29058	9.119082203338232	0.4M	61.4347	5.08025	8.269349406768487	0.5M				85.44204	8.11805	9.501236159623529	0.4M	59.27263000000001	5.80933	9.801032955682917	0.8M
	50.99562	4.83584	9.482853625468227	0.4M	44.32411	4.4119	9.953724959170078	0.5M				104.80925	10.03315	9.572771487249454	0.4M	71.4206	6.51736	9.125322385978277	0.8M
	57.23081	5.2382800000000005	9.152902081938034	0.4M	46.81985	4.99333	10.664985043736792	0.5M				102.97829	11.04118	10.721852149613282	0.4M	69.50546999999999	7.81151	11.238698191667506	0.8M
	58.40809	5.58752	9.566346031859627	0.4M	50.87791	4.82871	9.49077900409038	0.5M				108.71481000000001	10.44239	9.605305845634094	0.4M	77.77538	6.92737	8.906893158220507	0.8M
	64.08978	6.19303	9.663053922169807	0.4M	57.13502	5.96739	10.44436494465216	0.5M				94.12608	8.65235	9.192298245077241	0.4M	63.84895	5.53418	8.66761317139906	0.8M
	105.98078999999998	10.26803	9.688576580718072	0.4M	89.49466	9.27139	10.359713082322454	0.5M				102.50956	11.19444	10.920386352258268	0.4M	71.46632	7.56265	10.582117562510565	0.8M
	64.66638	7.66903	11.859377314765416	0.4M	55.53742	6.0298	10.857184219216522	0.5M				99.35265	9.99081	10.05590691340392	0.4M	67.61988000000001	6.637239999999999	9.815515792101374	0.8M
	92.52797	8.704930000000001	9.407890392494291	0.4M	79.71783	7.41776	9.305019968556595	0.5M				81.5714	8.15939	10.002758319705192	0.4M	56.06644	5.42739	9.680282892939163	0.8M
	69.74216	6.52666	9.35827052101627	0.4M	59.16856	5.25904	8.888233886374792	0.5M				65.30938	6.863360000000001	10.508995798153343	0.4M	47.129509999999996	4.73444	10.045595636364563	0.8M
	70.82571999999999	6.5707699999999996	9.277378330922723	0.4M	60.59984	6.05755	9.995983487745182	0.5M				80.63616	8.838280000000001	10.96069058844072	0.4M	56.67793	5.5624400000000005	9.814119887582345	0.8M
	64.64055	6.72554	10.404521619942898	0.4M	55.47145	6.12563	11.0428517732996	0.5M				97.29258	9.44703	9.709918269204085	0.4M	69.78405	5.974080000000001	8.560810099155898	0.8M
	73.6823	6.83471	9.27591836845484	0.4M	63.75711999999999	6.113980000000001	9.589485848796183	0.5M				82.7134	7.645569999999999	9.243447857300026	0.4M	57.032090000000004	5.0019	8.770325618436917	0.8M
	73.22086999999999	6.383859999999999	8.718634454903365	0.4M	63.433890000000005	5.0275	7.925574168634462	0.5M				91.86444	9.429680000000001	10.264777099822304	0.4M	65.6573	6.5342	9.95197792172386	0.8M
	76.57616999999999	7.624860000000001	9.95722298464392	0.4M	64.22103	6.766489999999999	10.536252688566346	0.5M				83.88826	7.9318100000000005	9.455208631100467	0.4M	58.640719999999995	5.205019999999999	8.87611884710829	0.8M
	63.485659999999996	5.93279	9.345086748724043	0.4M	53.4782	4.66642	8.725835948105956	0.5M				94.63835	8.13101	8.591665006839193	0.4M	65.48128	5.828180000000001	8.900528517463313	0.8M
	74.99039	5.99185	7.990157138801385	0.4M	62.429390000000005	4.9268	7.891795835262847	0.5M				85.35464	8.96835	10.507161649325683	0.4M	58.69835	5.64565	9.618072739693705	0.8M
	65.66455	5.64616	8.598490357430302	0.4M	58.90478	4.88486	8.29280747674467	0.5M				71.71363000000001	7.8	10.876593473235143	0.4M	50.53139	5.41375	10.713637602290378	0.8M
	85.35857	8.013069999999999	9.387540114601263	0.4M	73.43859	6.22034	8.470124494492609	0.5M				73.83824	7.9569399999999995	10.776177763717012	0.4M	51.4355	5.18794	10.086302262056362	0.8M
	69.37356	6.056780000000001	8.730674914189212	0.4M	62.84114	6.18313	9.839302724298127	0.5M				86.02684	9.03177	10.498781543062606	0.4M	57.82775	5.53631	9.573794588238346	0.8M
	57.18909	5.32221	9.306337974603197	0.4M	50.16811	4.4196800000000005	8.809739892533326	0.5M				71.37312	7.378760000000001	10.338289821153959	0.4M	49.25752	5.62361	11.416754233668282	0.8M
	67.00304	6.08821	9.086468315467478	0.4M	56.19226	5.79819	10.318485143683489	0.5M				82.63484	8.103589999999999	9.806505343266835	0.4M	57.624990000000004	5.721019999999999	9.928019076445825	0.8M
	64.74087	4.52045	6.982374503153882	0.4M	51.479859999999995	4.6579	9.048004404052381	0.5M				144.95445	13.96976	9.637344696903062	0.4M	96.08641999999999	8.96804	9.333306413122688	0.8M
	86.87065	8.71138	10.02798989071683	0.4M	73.50704	6.957380000000001	9.464916557652165	0.5M				86.54149	8.70135	10.054541469068766	0.4M	62.430659999999996	5.9435	9.520162048583181	0.8M
	73.21304	6.92471	9.458301417343138	0.4M	64.39909	5.68023	8.820357554741845	0.5M				115.65276000000001	11.14166	9.633717344921124	0.4M	78.21419	8.1588	10.431355231064849	0.8M
	64.50483	6.46434	10.021482112269732	0.4M	55.224030000000006	5.1449300000000004	9.316469660037487	0.5M				84.60571	8.649519999999999	10.223328898250482	0.4M	55.84704	5.73859	10.275549071177274	0.8M
	64.86117	6.46744	9.971204651411622	0.4M	56.71436	5.30976	9.362284966276619	0.5M				105.49959	10.55498	10.004759260201865	0.4M	69.88838	6.30924	9.027595145287385	0.8M
	59.5209	5.10803	8.581909883755118	0.4M	50.966840000000005	4.3928	8.618937332587228	0.5M				84.2489	9.95073	11.811109699948604	0.4M	59.144059999999996	6.952369999999999	11.754975901214761	0.8M
	57.894580000000005	6.820530000000001	11.780947370202876	0.4M	54.55234	5.47184	10.03044049072872	0.5M				80.5412	8.71055	10.815023863562995	0.4M	54.91973	5.721830000000001	10.418532647556717	0.8M
	72.39795	7.9131100000000005	10.930019427345664	0.4M	60.646069999999995	6.68987	11.031003327998008	0.5M				98.99586	9.757610000000001	9.856583901589422	0.4M	67.94493	6.30851	9.284739862120691	0.8M
	69.5125	7.49325	10.779715878439129	0.4M	69.46075	6.23085	8.970317769387748	0.5M				109.76283000000001	11.05289	10.069793207773522	0.4M	75.97097	6.653739999999999	8.75826647994622	0.8M
	80.39627	7.802510000000001	9.705064675264165	0.4M	69.10139000000001	6.84428	9.904692221097143	0.5M				96.348	9.79257	10.163750155685639	0.4M	69.19643	6.14027	8.87368033293047	0.8M
	78.38501	7.32954	9.350690903783772	0.4M	66.41161	6.43835	9.694615143346171	0.5M				72.56456999999999	7.72112	10.64034417898432	0.4M	50.86611	4.56606	8.976625104612875	0.8M
	53.57434	5.25141	9.802099288577331	0.4M	44.85504	4.27958	9.540912236395286	0.5M				77.26658	7.3346100000000005	9.492603399813996	0.4M	53.65426	4.71868	8.794604566347575	0.8M
	70.12073000000001	6.28872	8.96841775606158	0.4M	62.38721999999999	5.58635	8.954317887541713	0.5M				120.16963	12.69888	10.567462011824452	0.4M	83.2883	8.241010000000001	9.894559019694244	0.8M
	74.14949	5.2057199999999995	7.020574248049447	0.4M	64.01741	4.54175	7.094554434488994	0.5M				86.2324	8.67111	10.055512777100024	0.4M	56.6703	5.23966	9.245866000356449	0.8M
	68.42962	5.33681	7.798976525077883	0.4M	60.00765	3.94846	6.579927725881617	0.5M				80.30733000000001	7.4192800000000005	9.238608729738617	0.4M	56.64555	4.814080000000001	8.49860227325889	0.8M
	65.64603000000001	6.41305	9.769136077231174	0.4M	56.07434	5.2891	9.432300050254716	0.5M				106.44928999999999	10.18614	9.569006989149482	0.4M	77.34415	6.42199	8.303136048427708	0.8M
	61.68949	5.94834	9.642388030765046	0.4M	56.64969	5.67989	10.026339067345294	0.5M				71.33638	7.26178	10.179630645681767	0.4M	51.35674	4.2718	8.31789556735883	0.8M
	83.1544	7.47164	8.985261152747178	0.4M	71.23371	6.5614300000000005	9.211130516717436	0.5M				77.02416	8.12231	10.545145834761458	0.4M	54.44622	5.21181	9.572400067442699	0.8M
	84.00779	8.43849	10.044889884616651	0.4M	69.68401999999999	6.27266	9.001575971076297	0.5M				65.5647	7.5532699999999995	11.520330299688704	0.4M	44.56772	4.91648	11.03148197843641	0.8M
	89.63722	8.751710000000001	9.763477716064823	0.4M	74.00904	7.43055	10.04005726867961	0.5M				104.77131	10.3587	9.886962375482373	0.4M	70.74573000000001	6.4864	9.168609893487563	0.8M
	68.52515	6.7489	9.848792742518624	0.4M	58.32974	5.533	9.485727177937019	0.5M				82.09673000000001	7.90725	9.631626009951919	0.4M	58.00521	5.10636	8.80327818828688	0.8M
	99.98935	8.71928	8.720208702226786	0.4M	85.93838000000001	7.090139999999999	8.250260244607821	0.5M				71.19223000000001	7.29815	10.25132939367119	0.4M	48.46293	4.644909999999999	9.584459709720397	0.8M
	89.74539	7.276089999999999	8.107480506798176	0.4M	76.06845	6.1917	8.13964265079675	0.5M
	74.01007	6.1521099999999995	8.312530983959345	0.4M	64.18592	5.37894	8.380249126288133	0.5M				128.77358	13.45605	10.449387211258705	0.4M	81.23493	8.218539999999999	10.11700262436368	1.0M
	58.6264	5.64628	9.63095124380825	0.4M	51.5858	4.41865	8.565632402715478	0.5M				119.82791999999999	12.62454	10.535557990157887	0.4M	75.07305	8.54382	11.38067522233345	1.0M
	64.91794	5.543130000000001	8.53867205274844	0.4M	54.64447	4.3798	8.015083685503766	0.5M				72.13433	8.16458	11.318577437400473	0.4M	45.97726	4.8586	10.567397883214442	1.0M
	81.5483	7.0103100000000005	8.59651274152864	0.4M	67.07056	5.2513	7.829515662311453	0.5M				85.97108	8.559460000000001	9.956208529659046	0.4M	56.213319999999996	5.69142	10.124682192761432	1.0M
	75.87850999999999	7.00432	9.230966712445989	0.4M	63.294380000000004	5.136430000000001	8.115143872173169	0.5M				82.26608	8.66131	10.528409764996702	0.4M	51.65652	4.95442	9.591083565056259	1.0M
	66.32451999999999	6.18865	9.330862854341051	0.4M	55.28691	5.25799	9.510370537980872	0.5M				85.26913	9.18726	10.774426806043406	0.4M	54.43881	6.4405	11.830714154111746	1.0M
	86.66839	8.51615	9.826131534230646	0.4M	70.51076	6.43966	9.132875606503177	0.5M				119.62933999999998	11.817839999999999	9.878713700167534	0.4M	76.48985	7.21443	9.43187887020304	1.0M
	82.9741	6.68956	8.062226646628284	0.4M	69.69963	5.91879	8.491852826191474	0.5M				88.00118	8.93635	10.154807015087751	0.4M	54.05948000000001	5.898540000000001	10.911203733369245	1.0M
	70.07781	7.1364600000000005	10.183623032740321	0.4M	60.29537	5.99381	9.940746694149153	0.5M				84.16417	8.76961	10.419647695688083	0.4M	52.03517	5.47107	10.514177238202546	1.0M
	66.99304000000001	5.74155	8.5703679068751	0.4M	60.21106999999999	4.5692900000000005	7.58878724460469	0.5M				91.79438	9.47218	10.318910591258417	0.4M	58.96705	5.48464	9.301194480646394	1.0M
	62.96025	5.81995	9.24384830111062	0.4M	53.45483	5.12667	9.590658131360627	0.5M				68.41869	7.91122	11.562951585305127	0.4M	43.79153	4.68358	10.6951732446891	1.0M
	67.3118	5.752	8.545307063546064	0.4M	56.842819999999996	5.35475	9.420275067282024	0.5M				81.55114	7.96025	9.761053003060411	0.4M	52.02081	4.24904	8.167962013663379	1.0M
	79.69489	7.10312	8.912892658487891	0.4M	69.64628	7.24356	10.400498059623573	0.5M				67.58697	7.08988	10.490010130650923	0.4M	43.56072	3.62635	8.324816486045226	1.0M
	65.60831	5.32645	8.118559981197503	0.4M	58.3369	4.610180000000001	7.902682521697246	0.5M				74.65529000000001	7.5065800000000005	10.05498739607066	0.4M	46.3452	4.45351	9.609430965882119	1.0M
	65.58400999999999	5.36716	8.183641103982511	0.4M	54.9503	4.84809	8.822681586815722	0.5M				84.34064000000001	8.445960000000001	10.014104706817497	0.4M	50.94874	5.3897900000000005	10.578848466124972	1.0M
	88.13359	8.31536	9.434949830138544	0.4M	74.34903	7.2731699999999995	9.782467908458253	0.5M				85.69105	15.20175	17.740184068231162	0.4M	55.35559	9.18192	16.58715949012557	1.0M
	83.96889	6.88983	8.205217432313324	0.4M	74.31678000000001	6.22195	8.37220073313187	0.5M				84.00189	8.65628	10.304863378669218	0.4M	51.72348	5.84448	11.299471729280395	1.0M
	65.87969	4.67399	7.094735873833044	0.4M	58.07686999999999	4.45519	7.671195090231276	0.5M				90.81787	8.996030000000001	9.905572548662505	0.4M	55.5182	5.75874	10.372706607923169	1.0M
	56.01777	5.573869999999999	9.950181879785646	0.4M	48.46488	4.72445	9.748192918253382	0.5M				77.38866	8.94111	11.55351442963349	0.4M	46.480259999999994	5.757219999999999	12.386376496172783	1.0M
	67.34818	5.8428	8.675512834942237	0.4M	55.33934	4.78486	8.646398746352958	0.5M				112.66796000000001	9.44171	8.380119778506684	0.4M	70.65563	6.295719999999999	8.910429359981645	1.0M
	78.76174	7.49073	9.51062025800852	0.4M	66.87066999999999	6.12878	9.165124261503587	0.5M				68.85611999999999	7.486789999999999	10.873093052585595	0.4M	43.96205	5.51589	12.546935368118639	1.0M
	103.71399	9.11443	8.788042963152803	0.4M	89.09884	6.91878	7.765286282066073	0.5M				88.37415	9.17367	10.380490222536794	0.4M	54.69055	6.04942	11.061179673636486	1.0M
	65.1778	6.1375	9.41654980683607	0.4M	50.93142	4.54875	8.931127386591617	0.5M				109.71521000000001	8.483319999999999	7.732127569185711	0.4M	59.47667	6.994669999999999	11.760359145863411	1.0M
	67.50237	6.387580000000001	9.462749233841716	0.4M	58.18691	5.1348	8.824665203909266	0.5M				74.21914	7.6808	10.348812988132172	0.4M	84.07773	7.21638	8.582986243800827	1.0M
	73.07218	6.696560000000001	9.164308496065123	0.4M	64.86966	5.066330000000001	7.8100147279945675	0.5M				100.66818	9.50468	9.44159316280477	0.4M	63.143269999999994	6.15434	9.74662857973621	1.0M
	72.1502	5.71215	7.917025871030157	0.4M	60.2966	4.886019999999999	8.10330930765582	0.5M				78.83404	7.07216	8.970947068043197	0.4M	46.026920000000004	4.1576	9.032974615724884	1.0M
	65.97955	5.33196	8.08123122997959	0.4M	54.01922	4.50099	8.332201020303515	0.5M				96.19145	10.12275	10.523544452235619	0.4M	60.0612	6.0563	10.083548114256793	1.0M
	66.96628	5.00588	7.475224844503832	0.4M	57.62438	4.95861	8.60505570732388	0.5M				91.58793	9.273589999999999	10.125340751778099	0.4M	57.539669999999994	5.25177	9.127216058069155	1.0M
	61.61083000000001	5.493930000000001	8.917149793307443	0.4M	53.04505	4.50557	8.493855694357908	0.5M				98.09201999999999	10.35941	10.560910051602567	0.4M	61.89892	7.07177	11.424706602312286	1.0M
	79.28560999999999	8.041839999999999	10.142874602339566	0.4M	68.64415	6.35215	9.253738301078824	0.5M				76.79741999999999	8.3389	10.858307479600228	0.4M	49.74869	4.27712	8.597452515835089	1.0M
	56.503130000000006	4.71959	8.35279390716939	0.4M	47.53938	3.8070199999999996	8.008139778011408	0.5M				124.64573	9.59563	7.698322277064766	0.4M	80.91359	6.4558	7.978634985791633	1.0M
	69.89793	6.845460000000001	9.793508906486931	0.4M	60.05163	5.5003	9.159285101836536	0.5M				110.36022	10.26774	9.303841547253167	0.4M	67.44077	7.076860000000001	10.493444840561578	1.0M
	75.95775	6.37292	8.39008527767081	0.4M	63.727169999999994	5.9931	9.404309025491012	0.5M				143.7217	14.61709	10.170412679504903	0.4M	45.61322	5.62018	12.321384019808294	1.0M
	88.80379	9.237110000000001	10.401706954173916	0.4M	77.3978	7.304460000000001	9.437555072624804	0.5M				81.02904000000001	8.33032	10.280659872065618	0.4M	93.04981	8.376539999999999	9.002210751424425	1.0M
	101.15481	9.4141	9.306626150550825	0.4M	82.33985	8.27411	10.048730960768086	0.5M				79.99873000000001	7.744460000000001	9.68072868156782	0.4M	51.11038	4.68815	9.172598599345182	1.0M
	59.50134	5.78493	9.72235247138972	0.4M	50.3607	5.69829	11.31495392240378	0.5M				73.37961	8.117939999999999	11.062936965732034	0.4M	50.77599	4.5277199999999995	8.917049180134153	1.0M
	57.97484	5.66336	9.76865136669631	0.4M	49.02312	4.58204	9.346691928216726	0.5M
	68.03797	5.1019	7.498607027811088	0.4M	58.997440000000005	4.37844	7.421406759344134	0.5M
	64.81905	3.6202900000000002	5.585225331133363	0.4M	56.054840000000006	3.45005	6.1547762869361495	0.5M
	71.6039	6.72341	9.389725978612898	0.4M	60.97749	5.05858	8.295815390236626	0.5M
	71.12184	5.82567	8.191112603385962	0.4M	60.662440000000004	5.34999	8.819279277259536	0.5M
	66.1911	6.14101	9.277697454793769	0.4M	59.30019	5.51275	9.29634458169527	0.5M
	90.63395	7.792110000000001	8.597341283260853	0.4M	73.78128000000001	7.76685	10.52685721906695	0.5M
	72.02126	6.62277	9.195576417296781	0.4M	62.19068000000001	4.9305900000000005	7.928181521732839	0.5M
	65.98039	6.05935	9.183561964395786	0.4M	56.681230000000006	5.0041199999999995	8.828531067515646	0.5M
	62.50711	4.6982099999999996	7.516280947879368	0.4M	52.43381	4.64645	8.861553261149629	0.5M
	72.95145	6.2526	8.570905718803397	0.4M	65.74363000000001	5.791440000000001	8.809127211259858	0.5M
	126.17971000000001	6.56843	5.2056150707589985	0.4M	106.75126000000002	6.67784	6.255513986439129	0.5M
	83.5093	8.08417	9.680562524173956	0.4M	66.90853	6.6227	9.898140042831608	0.5M
	65.88150999999999	5.12268	7.775595914544158	0.4M	52.47274	4.45715	8.494220046446975	0.5M
	64.80119	5.24107	8.08792245944866	0.4M	57.0613	4.68202	8.205245937263959	0.5M
	54.9814	5.21861	9.491591701921013	0.4M	46.65579	3.6407199999999995	7.8033615977781094	0.5M
	67.28183	5.92587	8.807533921119564	0.4M	59.08935	5.1515	8.718153102039539	0.5M
	71.07486	6.637460000000001	9.338688813456686	0.4M	61.098330000000004	5.24521	8.584866394875275	0.5M
	63.22363000000001	5.538959999999999	8.760901580627369	0.4M	51.16039	4.51098	8.817329187678203	0.5M
	61.34675	5.5910400000000005	9.113832436111123	0.4M	50.91401	5.5079400000000005	10.81812255605088	0.5M
	76.40874000000001	6.959810000000001	9.108656941601183	0.4M	65.03634	5.9034	9.077079060722053	0.5M
	77.22949	6.27321	8.122816815182905	0.4M	67.01012	5.31642	7.9337568713501785	0.5M
	68.22569	5.719	8.382472936514091	0.4M	57.944880000000005	5.30828	9.160912922763838	0.5M
	68.06557	5.72487	8.410816217362171	0.4M	57.63145	5.10586	8.859502927654953	0.5M
	66.6609	5.8051	8.708403276883452	0.4M	54.221540000000005	4.96178	9.150938907305104	0.5M
	65.3151	6.37263	9.756748439487959	0.4M	55.87826	4.86344	8.703635367314586	0.5M
	57.182030000000005	5.46983	9.565645011203694	0.4M	50.2632	4.85586	9.660865205557943	0.5M
	63.745459999999994	5.12058	8.032854418181312	0.4M	52.565569999999994	4.37071	8.314777144050755	0.5M
	58.3789	5.8409	10.00515597244895	0.4M	52.49332	4.07643	7.765616653699939	0.5M
	58.483059999999995	5.36995	9.18206058301327	0.4M	50.151509999999995	4.71933	9.410145377477171	0.5M
	79.00757	8.12266	10.280862960346711	0.4M	68.62857	6.025469999999999	8.779827410071345	0.5M
	81.1417	6.969939999999999	8.589837284651418	0.4M	71.46599	5.96999	8.353609877929348	0.5M
	60.99105	5.409330000000001	8.869055377797235	0.4M	51.04224	5.23082	10.248022030381112	0.5M
	67.30548	3.54166	5.262067813794656	0.4M	58.073890000000006	3.4832	5.997876153982451	0.5M
	54.598980000000005	4.762169999999999	8.722086016991524	0.4M	45.5323	3.9842800000000005	8.750447484532959	0.5M
	58.236019999999996	4.68305	8.041500775636797	0.4M	48.33909	3.89362	8.054806162052284	0.5M
	51.42498	4.57924	8.904699622634759	0.4M	44.388490000000004	4.199730000000001	9.461304045260382	0.5M
	58.70926	4.95319	8.436812182609694	0.4M	49.784240000000004	4.22834	8.493330419425908	0.5M
	64.53111	5.7142599999999995	8.855046813854587	0.4M	57.36645	4.6550400000000005	8.114568706970712	0.5M
	73.11628	5.39869	7.38370442259918	0.4M	60.17814	4.7013	7.812305265666236	0.5M
	57.5986	5.21596	9.055706215081617	0.4M	48.65764	4.25584	8.7464990081722	0.5M
	77.36874	6.26056	8.09184691388279	0.4M	62.643930000000005	5.05776	8.073822954594323	0.5M
	67.03504000000001	5.70584	8.511727597984574	0.4M	55.07366	5.29099	9.607115270711988	0.5M
	56.734269999999995	4.65666	8.207843337016586	0.4M	45.95967	4.1498800000000005	9.029394684513619	0.5M
	66.75333	5.56993	8.344048154601426	0.4M	56.28171999999999	4.79045	8.5115557946701	0.5M
	59.08953	5.67705	9.607539609809047	0.4M	50.14322	4.58966	9.153101855046405	0.5M
	55.63672	4.4608300000000005	8.017780343629173	0.4M	48.4621	3.6543300000000003	7.540593577249026	0.5M
	72.63619	7.24843	9.979088936245143	0.4M	62.612880000000004	5.85649	9.353490847250596	0.5M
	64.17882	6.0936	9.494721155670984	0.4M	55.968090000000004	5.5978699999999995	10.001895723080775	0.5M
	62.048140000000004	6.0412099999999995	9.736327309730799	0.4M	50.1253	5.01994	10.014782953917482	0.5M
	57.43753	4.62825	8.057884801104784	0.4M	50.74459	4.14379	8.165973949144135	0.5M
	64.15295	5.36944	8.369747610982815	0.4M	53.44413	4.49001	8.401315542043625	0.5M
	62.17273	5.29071	8.509695488681292	0.4M	52.84505	4.24038	8.024176341965804	0.5M
	74.32162	6.78379	9.127613203264406	0.4M	66.52074	5.9646	8.966526830579454	0.5M
	59.66491	6.029319999999999	10.105303100264459	0.4M	50.73276	4.84009	9.540364056676594	0.5M
	63.17909	5.84226	9.247141736292813	0.4M	53.30899	4.87751	9.149507428296804	0.5M
	100.17011	8.90484	8.889717701218459	0.4M	89.4966	6.97087	7.788977458361545	0.5M
	62.13652	6.05682	9.747600927763576	0.4M	52.8697	4.8029	9.084409406522072	0.5M
	91.74303	8.67872	9.459814004399027	0.4M	74.90469	7.14827	9.543154106905723	0.5M
	66.0324	5.83215	8.832255074781473	0.4M	55.339569999999995	4.80895	8.689894048688851	0.5M
	58.7103	4.76501	8.116139757419056	0.4M	49.899190000000004	3.99051	7.997143841413057	0.5M
	93.79184000000001	8.27842	8.82637551411722	0.4M	79.00251999999999	6.34912	8.036604401986166	0.5M
	73.39429	8.0955	11.030149620631251	0.4M	62.50725	5.9248400000000006	9.47864447724064	0.5M
	54.493959999999994	5.37881	9.870470048423716	0.4M	47.263009999999994	4.18765	8.860311689839476	0.5M
	44.81278	4.72978	10.5545337736244	0.4M	36.72827	3.4418	9.37098316909563	0.5M
	80.15661999999999	7.711760000000001	9.620864752031713	0.4M	67.0458	5.94946	8.873725125212914	0.5M
	70.5743	6.56695	9.305016131934714	0.4M	55.51388000000001	4.92384	8.869565593325488	0.6M
	62.832469999999994	5.382709999999999	8.566764922658619	0.4M	53.82229	4.79772	8.914001986909142	0.6M
	72.70658	6.202719999999999	8.531167330384678	0.4M	60.063430000000004	5.10919	8.506324064409908	0.6M
	71.45139	6.20852	8.689152163449863	0.4M	56.143130000000006	4.4486300000000005	7.923729938106408	0.6M
	73.19291	5.168159999999999	7.061011783791626	0.4M	59.282790000000006	4.569380000000001	7.707768139792341	0.6M
	67.512	5.92275	8.77288482047636	0.4M	53.93159	4.9099699999999995	9.104070545667204	0.6M
	76.25734	5.88773	7.720869886098834	0.4M	64.01677	4.35794	6.807497472927798	0.6M
	58.01765	4.90982	8.462631630202187	0.4M	49.35464	4.7550300000000005	9.634413299337204	0.6M
	68.57134	5.99357	8.740634206652516	0.4M	56.721669999999996	5.021780000000001	8.853371207159451	0.6M
	56.08529	5.35637	9.550400827026124	0.4M	47.18207	4.094119999999999	8.677279313942773	0.6M
	50.2635	4.82062	9.590697026669453	0.4M	40.146879999999996	3.96941	9.887219131349685	0.6M
	46.234770000000005	5.02255	10.863144771781062	0.4M	36.76119	3.9925699999999997	10.86082904280302	0.6M
	46.536429999999996	3.45529	7.424914201626555	0.4M	37.333690000000004	2.91647	7.81189858275461	0.6M
	72.79586	6.30615	8.662786592534246	0.4M	61.20698	4.9208300000000005	8.039654954385922	0.6M
	61.0512	5.18719	8.496458710066305	0.4M	50.991479999999996	3.9503699999999995	7.747117753789457	0.6M
	76.20334	6.10731	8.014491228337237	0.4M	60.223380000000006	5.123880000000001	8.508124253404576	0.6M
	73.17469	6.93838	9.481939725333993	0.4M	59.031169999999996	5.17307	8.763285565913739	0.6M
	54.280680000000004	4.80197	8.84655461206455	0.4M	44.27933	3.08028	6.956473821984208	0.6M
	63.29476999999999	5.481330000000001	8.660004610175536	0.4M	50.50428	4.4334	8.778265921224895	0.6M
	56.88271999999999	5.0264	8.836426950047397	0.4M	46.639070000000004	4.143619999999999	8.884439591098191	0.6M
	100.13141	9.13512	9.123131293167647	0.4M	84.60041	7.27942	8.604473666262374	0.6M
	52.25904	4.60562	8.813058946356458	0.4M	44.213770000000004	4.47162	10.113636543547406	0.6M
	66.25609	4.715669999999999	7.117338194873859	0.4M	54.2716	3.9400199999999996	7.259819131921668	0.6M
	73.74628	5.90034	8.000864585983186	0.4M	62.89491999999999	4.18082	6.647309512437571	0.6M
	84.5304	7.804410000000001	9.232666590954262	0.4M	69.28583	5.62779	8.12256993962546	0.6M
	50.37227	5.44153	10.802630097869324	0.4M	43.7075	4.9633	11.355716982211291	0.6M
	72.57554	7.17105	9.880808327433733	0.4M	58.345909999999996	5.30095	9.085384048342036	0.6M
	48.18345	4.2771099999999995	8.876720118629944	0.4M	39.996159999999996	3.9443699999999997	9.86187173968701	0.6M
	55.43955	4.98571	8.993056401071078	0.4M	45.60687	3.74085	8.202382667348143	0.6M
	55.44668000000001	5.94618	10.724140742060658	0.4M	48.09462	4.802219999999999	9.984942182722307	0.6M
	65.91062	5.91147	8.968918817635155	0.4M	52.64686999999999	3.8887400000000003	7.386460011772781	0.6M
	58.338359999999994	5.12483	8.784665869935324	0.4M	46.64237	3.8306400000000003	8.212790216277604	0.6M
	63.86773	4.72893	7.404255638958829	0.4M	53.52126	4.73119	8.83983299346839	0.6M
	59.7703	4.82142	8.066581563084005	0.4M	46.52975	3.8520300000000005	8.278638935304834	0.6M
	58.340090000000004	5.18535	8.888141927789277	0.4M	47.383559999999996	3.9102699999999997	8.252376984760115	0.6M
	67.59039	5.4835199999999995	8.11286929991083	0.4M	54.70508	4.16288	7.609677199996782	0.6M
	61.03098000000001	5.23834	8.5830835421617	0.4M	49.42172	4.16086	8.419091848685152	0.6M
	63.34171	4.7875	7.558210853480274	0.4M	52.39844	3.6659300000000004	6.996257903861261	0.6M
	67.76113000000001	6.17138	9.107551777840776	0.4M	54.79345	4.71876	8.611905255098922	0.6M
	66.43961	5.4313	8.17479211572735	0.4M	51.653009999999995	4.00957	7.762509871157558	0.6M
	52.15363	4.13627	7.930934050036402	0.4M	41.805009999999996	3.3580099999999997	8.032553992930511	0.6M
	59.45301	5.81568	9.781977396939197	0.4M	47.71052	4.723409999999999	9.900143616124913	0.6M
	67.64479	5.75371	8.505769623942951	0.4M	55.043569999999995	4.627190000000001	8.406413319484912	0.6M
	98.77731	8.54005	8.645760853378171	0.4M	81.70461	7.00272	8.570777095686523	0.6M
	97.77704	8.74179	8.940534505851272	0.4M	75.77552	6.889589999999999	9.092105207592107	0.6M
	65.77668	5.42681	8.250355597150843	0.4M	58.450559999999996	4.37448	7.484068587195744	0.6M
	61.831990000000005	5.7249099999999995	9.258815703651134	0.4M	48.96693	3.92124	8.00793515133581	0.6M
	73.72721	6.28215	8.520802563938062	0.4M	60.911809999999996	5.11522	8.39774749757067	0.6M
	78.16056999999999	7.22508	9.243893692177528	0.4M	64.05256999999999	5.35918	8.36684617026296	0.6M
	55.99211	4.84596	8.654719388142365	0.4M	47.7144	4.0555	8.499530540046612	0.6M
	76.3961	5.371519999999999	7.031144259981857	0.4M	59.24015	4.6163099999999995	7.792535974334973	0.6M
	79.12098	6.56935	8.302917886001918	0.4M	64.04251	5.6203199999999995	8.77592086881042	0.6M
	76.8118	6.3862	8.314087158483462	0.4M	59.07376	5.6931400000000005	9.63734152016056	0.6M
	62.249	5.39872	8.672781892078588	0.4M	51.48336	4.96277	9.639561209680176	0.6M
	64.25115	6.4977599999999995	10.113064124144081	0.4M	54.81454	5.2819199999999995	9.635983445268353	0.6M
	60.15186	5.51506	9.168561038677774	0.4M	48.44184	4.77313	9.85332101340494	0.6M
	59.415519999999994	5.70103	9.595186577513754	0.4M	49.62495	4.26689	8.598275665768933	0.6M
	63.83449	5.316730000000001	8.328930018865979	0.4M	53.19996	4.39021	8.252280640812511	0.6M
	51.816559999999996	5.52985	10.671974364952055	0.4M	41.91943	3.47359	8.286348359221488	0.6M
	69.14876	6.76089	9.777311986505616	0.4M	56.39873000000001	5618	9.96121721180601	0.6M
	76.18647	6.772930000000001	8.889938069056095	0.4M	63.39196999999999	5.45538	8.605790291735689	0.6M
	81.57774	5.88429	7.213107399150798	0.4M	63.50022	4.932980000000001	7.76844552664542	0.6M
	79.95045	8.05044	10.069286664427779	0.4M	63.919059999999995	5.58185	8.732684742234946	0.6M
	63.31142	5.62897	8.890923627996338	0.4M	50.19566	5.7852	11.525299199173793	0.6M
	56.95796	5.79294	10.170553861128454	0.4M	42.11783	4.207669999999999	9.990234539623717	0.6M
	79.37339	7.17123	9.034803729562263	0.4M	59.7328	6.03012	10.09515709961696	0.6M
	50.733290000000004	4.96497	9.786414403639109	0.4M	39.95298	3.66491	9.173057929596242	0.6M
	57.6585	4.72011	8.18632118421395	0.4M	45.40245	3.7103900000000003	8.172224186139736	0.6M
	67.15998	7.27371	10.830423118053341	0.4M	51.22231	4.9458400000000005	9.655636381881255	0.6M
	55.49595	5.127680000000001	9.239737314164369	0.4M	41.47658	3.82029	9.210716023355833	0.6M
	64.29267	5.4566	8.487126137396379	0.4M	52.40509	4.135619999999999	7.891638006918793	0.6M
	52.11972	4.72675	9.069024162063801	0.4M	40.60552	2.8618799999999998	7.0480072660071835	0.6M
	74.41826999999999	6.84881	9.203129822824422	0.4M	56.83257	4.99631	8.791279366743401	0.6M
	70.00672	7.41113	10.586312285449168	0.4M	59.18387	4.85456	8.20250517581902	0.6M
	75.55459	7.41783	9.817841642711581	0.4M	61.808569999999996	5.6150199999999995	9.084533099536197	0.6M
	67.68128	6.37978	9.426210615402072	0.4M	52.8308	4.44767	8.41870651211036	0.6M
	73.75458	6.10035	8.271147364678912	0.4M	57.38426	4.28369	7.464921565600045	0.6M
	78.27844	7.36845	9.413128314769686	0.4M	61.00006	5.75526	9.434843178842774	0.6M
	58.4746	6.16702	10.546493691277922	0.4M	49.40291	4.63169	9.375338416299767	0.6M
	83.28096	8.00262	9.609183179444617	0.4M	63.78196	6.8234699999999995	10.698119029267836	0.6M
	70.00981	7.5351300000000005	10.76296307617461	0.4M	55.883630000000004	5.07046	9.073247389262292	0.6M
	69.436	5.53684	7.974019240739673	0.4M	55.478519999999996	4.19034	7.553085410353414	0.6M
	62.2095	5.89535	9.47660727059372	0.4M	49.540420000000005	5.2020800000000005	10.500678032200776	0.6M
	42.95935	3.83848	8.935144502884704	0.4M	33.54607	3.31543	9.883214337774888	0.6M
	60.427009999999996	5.35656	8.864512740246457	0.4M	47.64568	4.17093	8.754057030983713	0.6M
	54.967169999999996	5.02775	9.14682345843892	0.4M	43.606770000000004	3.5896800000000004	8.231932793921679	0.6M
	69.02816	6.1706199999999995	8.939279273849976	0.4M	54.926109999999994	5.21393	9.492625638334848	0.6M
	51.0313	5.03057	9.857812754133247	0.4M	40.3874	4.3535699999999995	10.779525297493771	0.6M
	68.72421999999999	6.94752	10.109274430470075	0.4M	54.227419999999995	5.1782900000000005	9.549209606505345	0.6M
	81.44225	7.016780000000001	8.615650967403283	0.4M	65.52635	5.0412300000000005	7.693439356838891	0.6M
	86.50435999999999	7.29615	8.434430357036339	0.4M	67.31695	4.77758	7.097142695858919	0.6M
	67.72828	5.25819	7.763655004969859	0.4M	52.85345	3.6823900000000003	6.967170544212347	0.6M
	73.46123	6.7929699999999995	9.247013696884737	0.4M	62.01608	5.84773	9.429377026087428	0.6M
	56.396440000000005	5.55966	9.858175445116748	0.4M	41.52297	3.76804	9.074591725977212	0.7M
	86.05011999999999	8.3127	9.660300299406904	0.4M	68.69934	5.82315	8.476282304895506	0.7M
	76.62133	6.35245	8.290707039410567	0.4M	60.364909999999995	5.19142	8.600062519765208	0.7M
	83.55508	7.13288	8.53674007612703	0.4M	64.93318000000001	5.19837	8.005722190103732	0.7M
	66.75761999999999	6.721710000000001	10.068828097826138	0.4M	51.0328	6.15562	12.062085560659026	0.7M
	69.48413000000001	6.58845	9.481949331451656	0.4M	54.38839	5.17167	9.508775678044524	0.7M
	89.16699	8.43942	9.464735772733835	0.4M	68.04561	7.0663100000000005	10.384666990273143	0.7M
	61.95101	5.8131699999999995	9.383495119772865	0.4M	49.113009999999996	4.97282	10.12526008892552	0.7M
	81.24462	7.35648	9.054728793118857	0.4M	61.2476	5.3796	8.783364572652642	0.7M
	71.08585	6.195069999999999	8.714913024181325	0.4M	56.51614	4.3064599999999995	7.619876375138146	0.7M
	62.52859	5.71323	9.136988376037266	0.4M	47.314170000000004	3.9572300000000005	8.363731203569671	0.7M
	73.33033	5.83327	7.954784875507856	0.4M	55.68095	4.52124	8.119904563409927	0.7M
	79.21946	7.17475	9.056802457376003	0.4M	59.387280000000004	5.59575	9.42247228699479	0.7M
	60.90838000000001	6.53172	10.723844567857492	0.4M	50.62256	5.48522	10.835524714672667	0.7M
	66.61151	6.24083	9.368996439203976	0.4M	53.81269	4.049980000000001	7.526068665216328	0.7M
	51.0318	4.87488	9.55263188835197	0.4M	38.97231	3.7793099999999997	9.697423632317406	0.7M
	68.93876	5.56848	8.077429881245326	0.4M	49.04186	4.42017	9.013055377589675	0.7M
	70.72559	6.08148	8.598698151545998	0.4M	53.30616	5.29473	9.932679450179869	0.7M
	66.76101	5.76414	8.63399160677767	0.4M	48.992259999999995	3.7534300000000003	7.661271392664884	0.7M
	54.89385	5.1559099999999995	9.392509361249028	0.4M	40.32456	3.54581	8.793177160519544	0.7M
	86.00076999999999	7.743119999999999	9.003547293820741	0.4M	64.79731	5.5551	8.573041072229696	0.7M
	92.89133000000001	8.099210000000001	8.719016080402769	0.4M	68.87188	5.75959	8.362759953699536	0.7M
	89.69843	8.95531	9.983797932695143	0.4M	70.19834	6.85381	9.763492982882502	0.7M
	72.75205	6.55465	9.009574300655446	0.4M	49.2039	4.86051	9.878302329693378	0.7M
	65.57044	6.43665	9.816389824439183	0.4M	48.70042	4.9238800000000005	10.110549354605155	0.7M
	68.80524	5.83568	8.481447052579135	0.4M	51.9243	4.45116	8.572402516740715	0.7M
	91.78818000000001	8.52895	9.291991626808592	0.4M	71.07460999999999	5.95035	8.371976997130199	0.7M
	82.19202	7.34777	8.93976081862935	0.4M	57.96983	5.595330000000001	9.652141467380533	0.7M
	74.81885	7.2930399999999995	9.747597029358243	0.4M	56.4938	5.0082699999999996	8.865167505106754	0.7M
	63.49345	5.80851	9.148203476106591	0.4M	48.5388	4.844930000000001	9.981561142838308	0.7M
	54.059619999999995	4.99684	9.243202227466638	0.4M	36.444590000000005	3.8523400000000003	10.570402904793276	0.7M
	69.53174	5.67288	8.158691268189175	0.4M	48.63648	3.88731	7.992580877563507	0.7M
	78.83219	6.63779	8.42015171721095	0.4M	58.93955	4.55635	7.730547654333975	0.7M
	54.93103000000001	4.8494	8.828161423515997	0.4M	41.33113	3.22209	7.7957945984056085	0.7M
	61.30384	5.77497	9.420241864131187	0.4M	43.59473	3.78505	8.682356789455973	0.7M
	61.69155	5.1689	8.378619113962934	0.4M	45.75193	3.19579	6.985038663942701	0.7M
	76.73679	6.8335	8.905115786052557	0.4M	62.377419999999994	4.91591	7.880912676413998	0.7M
	73.04456	5.73118	7.846142135704562	0.4M	51.421820000000004	3.50964	6.825195996563327	0.7M
	60.65368	5.729430000000001	9.44613748085854	0.4M	43.486959999999996	3.14585	7.234007619755439	0.7M
	71.78314	5.76005	8.024238003520045	0.4M	52.35757	4.55835	8.706190909929546	0.7M
	85.67201999999999	8.30189	9.69031662846283	0.4M	63.96603	5.6012699999999995	8.756632231201467	0.7M
	60.160619999999994	6.18184	10.27555899523642	0.4M	43.881879999999995	4.29352	9.784266307642245	0.7M
	120.30016	6.42272	5.338912267448356	0.4M	86.32819	5.4096400000000004	6.266365598537396	0.7M
	63.99483000000001	6.34511	9.915035323947262	0.4M	48.27531	4.69533	9.726151939780397	0.7M
	87.56433	6.588710000000001	7.524422330416964	0.4M	66.43466	5.456869999999999	8.213890159142831	0.7M
	63.932759999999995	6.12075	9.573730275370561	0.4M	48.927640000000004	5.39767	11.031944316137054	0.7M
	69.13115	5.3783199999999995	7.779879258481884	0.4M	52.42437	3.9718400000000003	7.576323759350852	0.7M
	62.87334	6.0132900000000005	9.564133224034226	0.4M	48.15895	4.29588	8.920211092642178	0.7M
	75.65227	7.64734	10.108540034555473	0.4M	63.55379	4.76178	7.492519328902336	0.7M
	52.61124	5.40035	10.264631664260337	0.4M	42.299620000000004	4.25902	10.068695652585056	0.7M
	74.75862	6.4741599999999995	8.660084950738792	0.4M	54.95831999999999	4.083559999999999	7.430285350789472	0.7M
	77.87007	6.69825	8.601828661512696	0.4M	59.49389	4.86785	8.182100716560978	0.7M
	82.41702	8.025839999999999	9.738085652696494	0.4M	60.081469999999996	5.01623	8.349046719396181	0.7M
	67.40153000000001	6.111759999999999	9.067687335880949	0.4M	48.83778	4.45311	9.118166304856608	0.7M
	58.16946	5.84215	10.043328578260827	0.4M	44.704440000000005	3.9697699999999996	8.880035182187719	0.7M
	72.17519	6.53351	9.052293454301957	0.4M	53.06406	4.46235	8.409364078059612	0.7M
	61.10034	5.959630000000001	9.753840976989654	0.4M	47.33563	3.49033	7.373578845364475	0.7M
	71.81877	6.16138	8.579066447392513	0.4M	53.46617	4.93064	9.22198092737894	0.7M
	75.76203000000001	5.79559	7.649729026532155	0.4M	55.12395	4.7203800000000005	8.563210727823387	0.7M
	69.61094	6.1088	8.775632106102863	0.4M	51.65959	4.89525	9.47597532229737	0.7M
	69.42463000000001	5.95378	8.575890141582317	0.4M	48.822520000000004	4.01041	8.214262598489386	0.7M
	72.94756	6.20097	8.500585900337173	0.4M	50.26846	3.8147599999999997	7.588774352745239	0.7M
	90.76651	7.33507	8.081251554124973	0.4M	68.0501	4.82984	7.09747671201071	0.7M
	75.20192	6.8478699999999995	9.105977613337531	0.4M	56.54169	4.67387	8.266236824544862	0.7M
	81.56393	7.77194	9.528648264005914	0.4M	60.05396999999999	4.54061	7.560882319686776	0.7M
	77.01467	7.694089999999999	9.99042130544739	0.4M	58.222469999999994	4.374230000000001	7.512958484928587	0.7M
	76.16190999999999	6.64417	8.723743929216061	0.4M	56.4919	3.52009	6.231141101644661	0.7M
	58.11642	5.5381599999999995	9.529423870224628	0.4M	42.83334	3.0566	7.136030017738519	0.7M
	67.12825	4.83139	7.197253019406882	0.4M	44.46071	3.64572	8.199869052923356	0.7M
	72.73708	6.22452	8.557561012897411	0.4M	49.52762	4.5328	9.152065049764152	0.7M
	66.88410999999999	5.91751	8.847407852178941	0.4M	49.335159999999995	3.8455199999999996	7.794684358984545	0.7M
	67.91676	7.34938	10.821158135340967	0.4M	48.24022	4.91018	10.178602004717225	0.7M
	47.1402	4.447830000000001	9.435322718189571	0.4M	34.44055	3.2258400000000003	9.366400943074371	0.7M
	73.36075	7.34744	10.015491935401425	0.4M	53.16803	5.552980000000001	10.444208672015872	0.7M
	94.50658	8.674439999999999	9.178662480432578	0.4M	65.27407	5.52263	8.460679715544014	0.7M
	62.99963	5.36989	8.523684980372106	0.4M	44.95648	3.5253900000000002	7.841783876317719	0.7M
	63.31036999999999	5.59373	8.835408796378855	0.4M	46.81675	3.68684	7.875044722241506	0.7M
	95.02232	9.20154	9.683556452841817	0.4M	71.03041	6.703860000000001	9.438013943605283	0.7M
	64.05636	5.97387	9.325959202177582	0.4M	47.621559999999995	4.03586	8.474858866446207	0.7M
	65.38628	6.61481	10.116510680833962	0.4M	46.27827	4.164540000000001	8.998910287700904	0.7M
	69.75829	7.742260000000001	11.09869522317706	0.4M	50.96853	4.86733	9.54967702619636	0.7M
	69.66149	6.55685	9.412445814753603	0.4M	48.958909999999996	4.36742	8.920582586499577	0.7M
	60.27255	5.70365	9.463097214237658	0.4M	41.95012	3.23273	7.706128135032748	0.7M
	71.3398	6.16489	8.64158576278599	0.4M	50.94842	3.9984300000000004	7.84799607132076	0.7M
	72.93762	6.63329	9.094470041660257	0.4M	57.67866	4.39846	7.625801292887179	0.7M
	83.38247	6.9011	8.276439879989162	0.4M	59.4768	4.30192	7.232937885024077	0.7M
	86.45898000000001	7.6836899999999995	8.887093046899233	0.4M	63.49354	5.3093699999999995	8.362063290218185	0.7M
	95.61144	8.35575	8.73927847964637	0.4M	66.38733	5.2710099999999995	7.939783088128411	0.7M
	60.90837	5.01029	8.22594661456217	0.4M	46.18755	3.49054	7.557317935244455	0.7M
	55.30216	4.81255	8.702282153174487	0.4M	38.5391	4.22104	10.952616952653282	0.8M
	66.75067	5.72438	8.575764108435166	0.4M	48.30599	4.57298	9.466693468035745	0.8M
	71.52101	6.654739999999999	9.304594552006465	0.4M	49.4701	4.800590000000001	9.704023238279284	0.8M
	60.91666	5.009930000000001	8.224236194170857	0.4M	48.52237	3.77775	7.785584257322962	0.8M
	61.11431999999999	5.87707	9.61651868170995	0.4M	41.999959999999994	4.0339599999999995	9.604675813976966	0.8M
	74.79696	6.41065	8.570736029913515	0.4M	51.97177	4.3828	8.43303970597884	0.8M
	62.34738	6.21611	9.970122240902505	0.4M	43.5482	4.5116	10.360014880063929	0.8M
	78.06815999999999	7.2541199999999995	9.292034037948378	0.4M	56.05222	4.9839199999999995	8.891565757788005	0.8M
	68.9898	6.5792600000000006	9.536569173993838	0.4M	50.65767	5.0168099999999995	9.903357181646925	0.8M
	57.29756999999999	6.05789	10.57268222718695	0.4M	38.31345	4.69652	12.25814955322478	0.8M
	59.06905	4.95479	8.388132194440235	0.4M	41.57188	3.94395	9.48706192743749	0.8M
	77.38669	5.52416	7.138385166751543	0.4M	54.041380000000004	4.53357	8.389071485591227	0.8M
	111.33431999999999	5.5269699999999995	4.964300316380429	0.4M	84.4797	7.06643	8.3646485487046	0.8M
	79.54649	6.63006	8.334824075832888	0.4M	52.410740000000004	4.25569	8.119881535731036	0.8M
	64.61975	5.678730000000001	8.787917006797459	0.4M	44.36626	3.8312699999999995	8.635548725540534	0.8M
	70.73113000000001	5.97344	8.445277206797062	0.4M	48.12876	4.398280000000001	9.138569121664469	0.8M
	62.65255	5.668130000000001	9.046926262378788	0.4M	43.55279	2.7480599999999997	6.309722063730015	0.8M
	59.45567	6.43722	10.826923655893543	0.4M	39.75143	4.11983	10.363979358729988	0.8M
	70.88132	6.3512699999999995	8.960428502178006	0.4M	50.947359999999996	4.38154	8.60013158679861	0.8M
	68.3147	6.0913900000000005	8.916660689427019	0.4M	47.435340000000004	3.66382	7.723819413964356	0.8M
	73.14044	5.8486	7.996397068434372	0.4M	52.12604	4.234380000000001	8.12334871400168	0.8M
	88.82972	7.191730000000001	8.096085409252671	0.4M	62.18108	4.59877	7.395770546281924	0.8M
	123.65857	6.73862	5.449375647801847	0.4M	86.89729	4.52267	5.20461570205469	0.8M
	59.77126	4.97018	8.315334158925209	0.4M	45.66291	3.9816800000000003	8.719724608002426	0.8M
	65.28273	5.97015	9.145067922251414	0.4M	46.84502	4.59365	9.806058360098897	0.8M
	57.93416	4.5483199999999995	7.850843094989207	0.4M	42.32336	2.7215599999999998	6.430396830497388	0.8M
	61.426140000000004	5.67629	9.240837858279878	0.4M	42.95445	4.38626	10.211421633847015	0.8M
	63.68436	6.16632	9.682628513500017	0.4M	45.58732	4.79856	10.5260848850075	0.8M
	75.54765	5.9343	7.85504247981241	0.4M	50.04782	3.5397199999999995	7.072675692967245	0.8M
	69.73959	6.38238	9.151731462717231	0.4M	49.121359999999996	4.66863	9.5042767545524	0.8M
	51.43842	4.6694	9.077650518814536	0.4M	37.30287	3.06192	8.208269229686618	0.8M
	85.55151	7.3829	8.629771701282655	0.4M	61.13523000000001	4.9223300000000005	8.051544093315753	0.8M
	59.52199	4.84699	8.143192121096757	0.4M	42.42024	3.89531	9.182668462036046	0.8M
	54.125	6.24296	11.534337182448038	0.4M	36.456	3.6633400000000003	10.048661400043889	0.8M
	78.74099	6.97098	8.853050996691811	0.4M	51.06578	4.2881599999999995	8.397325958792756	0.8M
	92.1555	8.76056	9.50628014605748	0.4M	66.82616	5.366280000000001	8.030208529114946	0.8M
	69.72041	6.09387	8.740439133963784	0.4M	51.56962	4.3265199999999995	8.389668180607108	0.8M
	59.5308	6.2735199999999995	10.538275984868337	0.4M	42.543620000000004	3.7194599999999998	8.742697494947539	0.8M
	222.80552999999998	12.59582	5.653279790676651	0.4M	150.10888	7.998130000000001	5.328219090036512	0.8M
	151.98892	8.362739999999999	5.502203713270677	0.4M	100.78335	5.5774	5.534049026947407	0.8M
	83.62714	8.3093	9.93612839085493	0.4M	58.789530000000006	4.70754	8.007446223842917	0.8M
	61.96763000000001	4.9618199999999995	8.007115973291215	0.4M	41.055479999999996	3.2663900000000003	7.956038998935101	0.8M
	54.7031	4.479430000000001	8.188621851412444	0.4M	35.81328	3.36805	9.404472307479237	0.8M
	58.75656	5.89204	10.027884545997926	0.4M	39.34152	3.8022199999999997	9.664649459400652	0.8M
	67.05568000000001	5.581580000000001	8.323798968260407	0.4M	47.147870000000005	3.81247	8.086197743397525	0.8M
	75.09358	6.2773900000000005	8.35942300260555	0.4M	50.5674	4.66646	9.228198404505669	0.8M
	91.59407	6.73367	7.3516440529392355	0.4M	64.51626	4.35	6.742486312752784	0.8M
	101.75238	8.91747	8.763893286820416	0.4M	70.3838	5.215	7.409375452874099	0.8M
	62.36082	5.0342	8.072696927333542	0.4M	39.88941	3.1021400000000003	7.7768510489375515	0.8M
	64.82744	5.12821	7.9105545429527995	0.4M	44.10601	3.99983	9.068673407546953	0.8M
	62.89731999999999	5.72464	9.101564263787393	0.4M	44.62661	3.69739	8.285168871218316	0.8M
	76.51934	6.63523	8.67131106985502	0.4M	51.27852	4.19356	8.178005137433765	0.8M
	74.58474	6.33517	8.493922483339086	0.4M	50.22505	4.03031	8.024501717768324	0.8M
	70.88676	6.3518099999999995	8.960502638292397	0.4M	49.944590000000005	3.8533800000000005	7.7153101066602	0.8M
	82.70203000000001	7.250719999999999	8.767281770471655	0.4M	58.780640000000005	4.9539	8.427774859205343	0.8M
	98.80319	7.90252	7.998243781400176	0.4M	67.60938	5.00801	7.407271002928882	0.8M
	67.9023	6.20619	9.139881859671913	0.4M	47.48039	4.46143	9.396363424984504	0.8M
	66.99443000000001	5.63249	8.407400436125807	0.4M	45.35617	4.18699	9.231357056823802	0.8M
	64.15222	6.28648	9.79931793474957	0.4M	39.22903	2.6497	6.754436701595731	1.0M
	81.35248	9.69313	11.914977883894872	0.4M	44.91426	4.6014	10.24485319361824	1.0M
	100.12223	9.8355	9.82349274481801	0.4M	63.79495	5.1814599999999995	8.122053548125674	1.0M
	69.47827	7.35535	10.586547419790389	0.4M	46.604279999999996	4.62549	9.925032636487465	1.0M
	61.0646	5.32357	8.717931502048652	0.4M	38.628659999999996	3.77146	9.763372583982981	1.0M
	67.86969	7.648280000000001	11.269065764113554	0.4M	43.7774	4.57511	10.45084906824069	1.0M
	56.41259	5.27808	9.356209314268323	0.4M	37.18015	2.81772	7.578560064980911	1.0M
	82.91166	6.864730000000001	8.279571293108836	0.4M	51.11327	4.0264	7.877406395638549	1.0M
	79.50908000000001	8.06666	10.145583372364515	0.4M	49.16537	5.1696599999999995	10.51484001849269	1.0M
	56.793659999999996	4.70024	8.275994186675062	0.4M	35.062940000000005	3.67105	10.469886438501733	1.0M
	96.22438000000001	8.46001	8.791961039395629	0.4M	59.33961	4.8276699999999995	8.135661828582965	1.0M
	61.11083000000001	6.7077	10.976286854555893	0.4M	38.62643	3.9446800000000004	10.212385664427183	1.0M
	122.62033999999998	11.324060000000001	9.235058392433102	0.4M	75.71596	6.85353	9.051631914856525	1.0M
	75.25419000000001	7.58444	10.078428855589303	0.4M	43.251090000000005	3.46485	8.011011976807984	1.0M
	60.019740000000006	5.77111	9.61535321545878	0.4M	36.484629999999996	3.56961	9.783873373527427	1.0M
	65.90160999999999	7.39842	11.22646320780327	0.4M	37.95995	5.01966	13.22356852419458	1.0M
	74.4475	8.447519999999999	11.346949192383892	0.4M	44.37594	5.5442	12.493707175555043	1.0M
	89.52285	9.03748	10.095165647653086	0.4M	55.2477	5.8096	10.515550873611028	1.0M
	87.73085999999999	8.362160000000001	9.5316060961901	0.4M	52.38073	5.00296	9.55114600350167	1.0M
	67.81442	7.60628	11.216316529729223	0.4M	41.15748	3.93554	9.562150063609337	1.0M
	70.6702	7.7253	10.931481727800403	0.4M	43.876979999999996	3.81313	8.690502400119609	1.0M
	68.11576	6.836310000000001	10.03631171405854	0.4M	40.7041	3.8561	9.473492842244394	1.0M
	111.37082	9.614519999999999	8.632889656374982	0.4M	65.56975	6.27431	9.56890944376027	1.0M
	88.27496	9.09459	10.302570513767439	0.4M	58.48888	5.59576	9.56722029896965	1.0M
	72.92206	7.34932	10.078321978287502	0.4M	43.99532	3.89039	8.84273600010183	1.0M
	74.32906	7.64942	10.291291185439452	0.4M	45.24248	5.26469	11.636607895942044	1.0M
	72.95834	6.799639999999999	9.319894065572214	0.4M	47.6509	4.684130000000001	9.830097647683465	1.0M
	77.30219	5.99969	7.7613454418303025	0.4M	50.42709	3.6165	7.171740427615394	1.0M
	52.54263	5.77846	10.997660375965191	0.4M	29.961840000000002	3.81043	12.717610133423046	1.0M
	76.45523	7.0123	9.171772813972307	0.4M	46.65653	4.5617	9.777195175037665	1.0M
	90.53627	10.02013	11.06753127779618	0.4M	53.95933	6.36191	11.790194578027561	1.0M
	81.56127	6.38389	7.827109607292776	0.4M	49.35589	3.6247300000000005	7.344067749563426	1.0M
	71.51201	6.19829	8.667481168547772	0.4M	41.8057	4.84667	11.593323398483937	1.0M
	59.23279	5.4634599999999995	9.223708692432012	0.4M	36.28669	2.30305	6.346817524552391	1.0M
	91.02566	8.38743	9.214357797570488	0.4M	54.43342	3.99991	7.348261417342508	1.0M
	64.68411	6.07941	9.39861428100348	0.4M	39.9904	3.18257	7.958335000400096	1.0M
	77.70260999999999	6.14391	7.906954476818733	0.4M	50.63068	3.5211099999999997	6.95449873475924	1.0M
	76.08804	6.845330000000001	8.996591317111074	0.4M	46.57121	2.8753	6.1739860312841355	1.0M
	59.74341999999999	5.26613	8.814577404507478	0.4M	34.85	3.87589	11.121635581061692	1.0M
	56.844269999999995	5.33513	9.385519419987276	0.4M	37.054140000000004	2.11714	5.713639555526049	1.0M
	80.37871	7.8358	9.748601339832401	0.4M	50.96301	4.00139	7.851557433518938	1.0M
	62.226290000000006	5.82873	9.366989418781033	0.4M	40.73843	3.3850599999999997	8.309254922195086	1.0M
	76.19224	5.45455	7.158931145743977	0.4M	45.75591	3.79814	8.300873045689618	1.0M
	88.75759000000001	8.19695	9.235210194418302	0.4M	54.8061	5.34981	9.76134043473263	1.0M
	76.51019000000001	7.04445	9.207204948778717	0.4M	45.60883	4.14786	9.09442316323396	1.0M
	88.83276	8.48978	9.557037291197528	0.4M	51.176759999999994	5.927309999999999	11.582034501597992	1.0M
	102.37810999999999	8.75283	8.549513172298258	0.4M	59.192969999999995	4.70317	7.945487445553079	1.0M
	69.63815	5.3242400000000005	7.645579326848861	0.4M	46.00987	3.78493	8.226343608447491	1.0M
	69.16124	6.944260000000001	10.040681746018434	0.4M	43.8232	4.15568	9.482831011884118	1.0M
	71.20913	6.20884	8.719162837686685	0.4M	42.72511	3.4871	8.161710993839453	1.0M
	82.74489	6.6439699999999995	8.029462604881099	0.4M	46.688340000000004	4.41286	9.451738913827306	1.0M
	70.57517	6.19332	8.775494270860417	0.4M	39.23166	3.37849	8.611641719978202	1.0M
	83.84286	7.55935	9.016092723936183	0.4M	51.25717	6.1476	11.993639133803132	1.0M
	85.36497	7.13742	8.361064263245217	0.4M	55.90671999999999	3.8540699999999997	6.893750876459932	1.0M
	86.41778000000001	6.557289999999999	7.587894528186212	0.4M	44.38203	3.94867	8.897001782027546	1.0M
	55.751219999999996	5.76422	10.33918181521409	0.4M	33.563109999999995	3.82904	11.408477939022935	1.0M
	59.12838000000001	6.16413	10.424993886184602	0.4M	39.25802	4.063280000000001	10.350190865458831	1.0M
	76.02556	6.59841	8.679199469231138	0.4M	49.136959999999995	3.6156900000000003	7.358391727937587	1.0M
	65.95561	6.4869699999999995	9.835357447228523	0.4M	39.80989	3.87825	9.741925938504226	1.0M
	67.18569000000001	5.9363	8.835661284419345	0.4M	44.522909999999996	3.9569400000000003	8.887424474276278	1.0M
	69.40460999999999	6.5170699999999995	9.389967035330939	0.4M	44.04071	3.5077	7.964676318796858	1.0M
	105.51971	9.853010000000001	9.337601477487004	0.4M	59.690430000000006	5.73002	9.59956227489063	1.0M
	78.70147	7.22547	9.18085774001426	0.4M	47.67438	4.66605	9.787332315595924	1.0M
