# Supplementary material for: Control of nuclear size by osmotic forces in Schizosaccharomyces pombe
Source: eLife. 2022 Jul 20;11:e76075. doi: 10.7554/eLife.76075 (PMC9410708; doi:10.7554/eLife.76075)
Supplement: Figure 5—source data 1. — Related to Figure 5B–E. [file elife-76075-fig5-data1.xlsx]

## Sheet: Sheet1
Volume Cell	Volume Nucl	Time	NC	date	Condition			Volume Cell	Volume Nucl	Time	NC	date	Condition
89.63179000000001	7.22881	0	8.065006846343243	2020-05-27	LMB			90.67489	7.27617	0	8.024459693306492	2020-05-27	Ctrl
86.41816999999999	6.5712	0	7.603956436476265	2020-05-27	LMB			97.91825	7.674639999999999	0	7.837803473816168	2020-05-27	Ctrl
100.84357	6.5432	0	6.488465253659702	2020-05-27	LMB			92.52951999999999	7.423839999999999	0	8.023212483972681	2020-05-27	Ctrl
83.81263	7.36788	0	8.790894642012786	2020-05-27	LMB			98.93143	7.40975	0	7.489783580405135	2020-05-27	Ctrl
86.69875	7.643339999999999	0	8.81597485546216	2020-05-27	LMB			93.85256	7.35798	0	7.839935319825053	2020-05-27	Ctrl
85.76236	6.865810000000001	0	8.005621580376287	2020-05-27	LMB			93.60499	6.670839999999999	0	7.126585879663039	2020-05-27	Ctrl
106.20223	8.86373	0	8.346086518145617	2020-05-27	LMB			88.63614	7.045089999999999	0	7.948326720906392	2020-05-27	Ctrl
98.50962	8.66032	0	8.79134443925375	2020-05-27	LMB			93.75243	7.11868	0	7.593061854503398	2020-05-27	Ctrl
96.26098	7.65947	0	7.9569831929822445	2020-05-27	LMB			106.23416999999999	8.44534	0	7.949739711808357	2020-05-27	Ctrl
161.81998000000002	12.65719	0	7.821772070420476	2020-05-27	LMB			100.882	8.96261	0	8.884250907000258	2020-05-27	Ctrl
97.53667	7.82032	0	8.017825500911606	2020-05-27	LMB			90.56644	7.5685	0	8.356848298332142	2020-05-27	Ctrl
129.52803	10.99934	0	8.491860796462356	2020-05-27	LMB			93.68365	6.879	0	7.342796742014214	2020-05-27	Ctrl
123.14688000000001	8.92274	0	7.2456078465000475	2020-05-27	LMB			88.32526999999999	7.32333	0	8.29131912079069	2020-05-27	Ctrl
107.6819	6.874110000000001	0	6.38371908370859	2020-05-27	LMB			99.95527	7.37298	0	7.376279409779995	2020-05-27	Ctrl
102.05924	8.80223	0	8.624628206128126	2020-11-12	LMB			99.70484	7.8183	0	7.841444808496758	2020-05-27	Ctrl
103.02094	7.69716	0	7.471451920357163	2020-11-12	LMB			101.98525	7.72842	0	7.577978188022288	2020-05-27	Ctrl
104.03950999999999	8.1001	0	7.785599912956146	2020-11-12	LMB			89.8498	7.544630000000001	0	8.396935775037898	2020-05-27	Ctrl
101.29879	8.19967	0	8.094538937730649	2020-11-12	LMB			92.90149	7.25833	0	7.812931740922562	2020-05-27	Ctrl
87.69433000000001	7.1205	0	8.11968116980881	2020-11-12	LMB			88.37859	7.35135	0	8.318021366939663	2020-05-27	Ctrl
114.56711000000001	8.604410000000001	0	7.510366631400583	2020-11-12	LMB			86.06165	6.4414	0	7.484634561387098	2020-05-27	Ctrl
126.92166	10.03438	0	7.905963410815775	2020-11-12	LMB			83.51467	7.570989999999999	0	9.065461193823792	2020-05-27	Ctrl
96.99047	7.80932	0	8.051636413350714	2020-11-12	LMB			87.28449	6.9603600000000005	0	7.974337708795686	2020-05-27	Ctrl
91.08808	7.059010000000001	0	7.749652863470171	2020-11-12	LMB			98.35123	8.31109	0	8.450417956135373	2020-05-27	Ctrl
93.42857	7.81498	0	8.364657620254706	2020-11-12	LMB			83.71778	7.02796	0	8.394823656336802	2020-05-27	Ctrl
97.51326	7.867089999999999	0	8.067713047435804	2020-11-12	LMB			99.62957	7.40716	0	7.434700360545569	2020-05-27	Ctrl
114.55243	8.95305	0	7.815678811876797	2020-11-12	LMB			78.3625	6.331180000000001	0	8.079349178497369	2020-05-27	Ctrl
113.62721	9.41262	0	8.283772874472584	2020-11-12	LMB			102.22593	8.23404	0	8.054746970753897	2020-05-27	Ctrl
100.11511	8.91238	0	8.902132754985736	2020-11-12	LMB			91.41351999999999	7.88346	0	8.623954093442634	2020-05-27	Ctrl
121.97653999999999	9.67141	0	7.928909936287749	2020-11-12	LMB			91.20934	8.07012	0	8.847909654866486	2020-05-27	Ctrl
115.36471999999999	9.37617	0	8.12741538314313	2020-11-12	LMB			87.5691	7.42278	0	8.476483143026478	2020-05-27	Ctrl
122.19953999999998	9.940660000000001	0	8.134776939422196	2020-11-12	LMB			94.92671999999999	7.833939999999999	0	8.252618440835205	2020-05-27	Ctrl
111.41866	8.222560000000001	0	7.379876943413249	2020-11-12	LMB			109.42331999999999	8.8421	0	8.080635827902134	2020-05-27	Ctrl
119.62643	9.17929	0	7.673295943045362	2020-11-12	LMB			97.63103000000001	7.283360000000001	0	7.460087228414983	2020-11-26	Ctrl
93.50734	7.184410000000001	0	7.683257806285582	2020-11-12	LMB			129.44168	10.87844	0	8.40412454473706	2020-11-26	Ctrl
80.37833	6.5714	0	8.17558662888368	2020-11-12	LMB			83.05513	6.6609	0	8.019853800722483	2020-11-26	Ctrl
99.38686	8.47838	0	8.530685042268162	2020-11-12	LMB			82.09191	6.79782	0	8.28074288928105	2020-11-26	Ctrl
97.05436	7.6014800000000005	0	7.832188064503233	2020-11-12	LMB			110.86932	8.83071	0	7.964971734290424	2020-11-26	Ctrl
106.91082	9.52641	0	8.91061353752595	2020-11-12	LMB			102.74051	9.06794	0	8.826060917937822	2020-11-26	Ctrl
120.1616	9.26309	0	7.708860401326214	2020-11-26	LMB			115.26435	9.12783	0	7.91904001540806	2020-11-26	Ctrl
110.92128000000001	8.650830000000001	0	7.799071557775028	2020-11-26	LMB			121.52671000000001	10.08115	0	8.295419171637246	2020-11-26	Ctrl
84.21942	7.009239999999999	0	8.322593530090803	2020-11-26	LMB			126.41063	9.67603	0	7.654443301168581	2020-11-26	Ctrl
85.10373	6.28988	0	7.390839390940915	2020-11-26	LMB			121.77136000000002	8.1563	0	6.698044597678797	2020-11-26	Ctrl
105.47356	7.8573699999999995	0	7.449611068404251	2020-11-26	LMB			102.43389	8.06222	0	7.870656869518476	2020-11-26	Ctrl
82.67342	7.37688	0	8.922916216602628	2020-11-26	LMB			101.21392	7.8561	0	7.761877022449086	2020-11-26	Ctrl
90.68072	7.209389999999999	0	7.950300791612593	2020-11-26	LMB			102.61785	7.832439999999999	0	7.632629216067184	2020-11-26	Ctrl
126.10163	10.0551	0	7.973806524150401	2020-11-26	LMB			100.84784	8.211839999999999	0	8.142802066955522	2020-11-26	Ctrl
82.79363000000001	6.46366	0	7.806953264399688	2020-11-26	LMB			96.16212	7.8887100000000006	0	8.20355250071442	2020-11-26	Ctrl
159.70401999999999	10.26909	0	6.430076087001443	2020-11-26	LMB			113.15534	7.67627	0	6.783833621992564	2020-11-26	Ctrl
135.04023999999998	10.557830000000001	0	7.818284386935333	2020-11-26	LMB			97.12236999999999	8.15358	0	8.395161691379649	2020-11-26	Ctrl
112.13443999999998	8.14044	0	7.2595359641516035	2020-11-26	LMB			113.24553999999999	8.73658	0	7.714723246496066	2020-11-26	Ctrl
131.76093999999998	10.83695	0	8.224706047179081	2020-11-26	LMB			113.0762	8.66761	0	7.6652823494245474	2020-11-26	Ctrl
88.69511999999999	6.96018	0	7.847308848558975	2020-11-26	LMB			144.63498	9.85215	0	6.811733924946786	2020-11-26	Ctrl
88.94309	6.69595	0	7.5283532425059665	2020-11-26	LMB			120.58578	9.14325	0	7.582361701354837	2020-11-26	Ctrl
93.48079	7.26911	0	7.776046822026216	2020-11-26	LMB			84.90835	6.28505	0	7.402157738314312	2020-11-26	Ctrl
114.69643	7.697310000000001	0	6.711028407771716	2020-11-26	LMB			86.58935	6.44875	0	7.44750942234813	2020-11-26	Ctrl
114.77733	7.697310000000001	0	6.706298186235906	2020-11-26	LMB			90.77465	7.149830000000001	0	7.876461104504397	2020-11-26	Ctrl
85.18965	6.9522699999999995	0	8.160932695462417	2020-11-26	LMB			104.95926000000001	8.37421	15	7.978533766339433	2020-05-27	Ctrl
107.51796000000002	8.89438	0	8.272459782533074	2020-11-26	LMB			110.70485	8.487210000000001	15	7.666520482164965	2020-05-27	Ctrl
97.18075	8.222430000000001	0	8.460965777687454	2020-11-26	LMB			100.80643	8.32843	15	8.261804331330849	2020-05-27	Ctrl
116.23911000000001	8.57981	0	7.381173169684454	2020-11-26	LMB			105.33703999999999	7.92851	15	7.526801588501064	2020-05-27	Ctrl
122.60843999999999	9.08029	0	7.405925725830947	2020-11-26	LMB			101.79006	7.3954	15	7.265345948317548	2020-05-27	Ctrl
88.88407	7.50378	0	8.442210173319022	2020-11-26	LMB			106.03088999999999	7.971839999999999	15	7.518412794611081	2020-05-27	Ctrl
104.42255	7.909739999999999	0	7.5747431948367465	2020-11-26	LMB			98.67097	8.12372	15	8.233140912671681	2020-05-27	Ctrl
84.98221	7.30385	0	8.594563497466117	2020-11-26	LMB			101.91051	8.178460000000001	15	8.025138918449139	2020-05-27	Ctrl
140.0143	11.44182	0	8.171893870840336	2020-11-26	LMB			110.3959	8.84278	15	8.010061967881052	2020-05-27	Ctrl
102.05322	7.96051	0	7.800351620458424	2020-11-26	LMB			103.49603	8.65629	15	8.36388603504888	2020-05-27	Ctrl
94.81576	7.69972	0	8.12071748409758	2020-11-26	LMB			95.37946	7.807589999999999	15	8.185819043219578	2020-05-27	Ctrl
82.44001	6.72105	0	8.152655488518258	2020-11-26	LMB			97.47308000000001	7.5983600000000004	15	7.795342057519881	2020-05-27	Ctrl
84.51638	7.05248	0	8.344512625836554	2020-11-26	LMB			94.71921999999999	8.19442	15	8.651274788791545	2020-05-27	Ctrl
85.48108	6.00139	0	7.020723182252727	2020-11-26	LMB			109.77486999999999	8.19197	15	7.462518516305235	2020-05-27	Ctrl
76.91488000000001	6.44268	0	8.376376586689076	2020-11-26	LMB			107.5602	7.866619999999999	15	7.313690379898884	2020-05-27	Ctrl
115.77306000000002	9.792760000000001	0	8.458582678906474	2020-11-26	LMB			110.02933	8.42125	15	7.653641079155894	2020-05-27	Ctrl
107.01332	8.41953	0	7.867740202808398	2020-11-26	LMB			96.30056	7.74682	15	8.044418433288445	2020-05-27	Ctrl
121.20035	9.356710000000001	0	7.720035461943799	2020-11-26	LMB			100.14095999999999	7.508439999999999	15	7.4978710010369385	2020-05-27	Ctrl
121.41089	10.34491	0	8.520578343507736	2020-11-26	LMB			96.14463	7.7149600000000005	15	8.02432751574373	2020-05-27	Ctrl
100.14768000000001	8.56672	0	8.554087323840152	2020-11-26	LMB			90.36799	7.497319999999999	15	8.296433283511119	2020-05-27	Ctrl
97.51621	8.05671	0	8.26191871074563	2020-11-26	LMB			87.39394	7.67025	15	8.77663828865022	2020-05-27	Ctrl
142.70888	10.87962	0	7.62364612489426	2020-11-26	LMB			95.25685	7.37447	15	7.741668971837721	2020-05-27	Ctrl
139.12586000000002	11.56197	0	8.310439195128785	2020-11-26	LMB			107.7741	8.40008	15	7.794154625276389	2020-05-27	Ctrl
94.1446	7.55178	0	8.021469101785977	2020-11-26	LMB			91.5269	6.90527	15	7.544525161455265	2020-05-27	Ctrl
95.75780999999999	7.5935	0	7.929901487930855	2020-11-26	LMB			102.68178	7.764069999999999	15	7.5612927629419735	2020-05-27	Ctrl
90.76808	7.43955	0	8.19621831815766	2020-11-26	LMB			84.42029000000001	7.19768	15	8.526007195663507	2020-05-27	Ctrl
127.56733999999999	10.68565	0	8.376477866513483	2020-11-26	LMB			109.72146000000001	8.61265	15	7.849558327058352	2020-05-27	Ctrl
96.91148000000001	8.40905	15	8.677042183237734	2020-05-27	LMB			98.07727	8.551110000000001	15	8.718747983095371	2020-05-27	Ctrl
92.11199	7.518619999999999	15	8.162477002179628	2020-05-27	LMB			100.28031999999999	9.41859	15	9.392261612248546	2020-05-27	Ctrl
110.70236000000001	7.86596	15	7.105503441841709	2020-05-27	LMB			96.51524	7.54749	15	7.819998168164944	2020-05-27	Ctrl
94.60407	8.22444	15	8.693537180799938	2020-05-27	LMB			103.05258	8.172139999999999	15	7.930068320463203	2020-05-27	Ctrl
89.69394	7.68273	15	8.565495060201393	2020-05-27	LMB			116.94207	10.06226	15	8.6044825442204	2020-05-27	Ctrl
96.41228000000001	7.6170100000000005	15	7.900456248934264	2020-05-27	LMB			110.77694	8.38946	15	7.573290975540576	2020-11-26	Ctrl
113.49518	10.0798	15	8.881258217309316	2020-05-27	LMB			140.29766999999998	11.62128	15	8.283302210222026	2020-11-26	Ctrl
106.15028999999998	10.33168	15	9.733068086766416	2020-05-27	LMB			91.85161	6.89325	15	7.5047677444086185	2020-11-26	Ctrl
105.74176000000001	10.800889999999999	15	10.214403467466399	2020-05-27	LMB			90.58627	7.461239999999999	15	8.236612457936506	2020-11-26	Ctrl
102.98091	8.70565	15	8.453654177264506	2020-05-27	LMB			119.37866000000001	9.123460000000001	15	7.642454689975579	2020-11-26	Ctrl
175.5732	13.911970000000002	15	7.923743487046998	2020-05-27	LMB			110.83216000000002	9.610610000000001	15	8.67131886629296	2020-11-26	Ctrl
102.42884000000001	8.811739999999999	15	8.602791948049004	2020-05-27	LMB			128.21341999999999	9.98625	15	7.788771253430414	2020-11-26	Ctrl
139.91239	11.798119999999999	15	8.432505512914188	2020-05-27	LMB			130.50342	10.69137	15	8.192405992118827	2020-11-26	Ctrl
132.40505	9.83427	15	7.427413078277604	2020-05-27	LMB			138.1301	10.464210000000001	15	7.575618927373542	2020-11-26	Ctrl
111.61631000000001	8.23516	15	7.378097340791861	2020-05-27	LMB			118.84523999999999	9.79732	15	8.24376306531082	2020-11-26	Ctrl
107.81901	9.332510000000001	15	8.65571850455685	2020-11-12	LMB			106.75573999999999	8.94232	15	8.376430157291779	2020-11-26	Ctrl
106.50551999999999	8.21782	15	7.715862990012161	2020-11-12	LMB			110.78307	8.42713	15	7.606875310460344	2020-11-26	Ctrl
112.9663	8.97935	15	7.948697974528687	2020-11-12	LMB			109.22278	8.88466	15	8.134438621686794	2020-11-26	Ctrl
108.92026000000001	8.726239999999999	15	8.011585723353946	2020-11-12	LMB			108.93027	8.57273	15	7.869924493898712	2020-11-26	Ctrl
94.67748	7.49883	15	7.920394585914201	2020-11-12	LMB			105.68958	8.3147	15	7.867095318195038	2020-11-26	Ctrl
122.46695	9.45017	15	7.716506371719064	2020-11-12	LMB			122.85003	8.24757	15	6.713527054083747	2020-11-26	Ctrl
135.20582	10.6899	15	7.9063904201757005	2020-11-12	LMB			108.36805	8.70173	15	8.029792914055388	2020-11-26	Ctrl
102.2228	8.048680000000001	15	7.873664192332826	2020-11-12	LMB			120.98926999999999	9.54796	15	7.891575839741821	2020-11-26	Ctrl
96.42385999999999	7.89611	15	8.18895862497104	2020-11-12	LMB			122.14648000000001	9.446439999999999	15	7.733698097562859	2020-11-26	Ctrl
101.28009	8.42577	15	8.31927578263408	2020-11-12	LMB			191.40928	10.70738	15	5.593971201396297	2020-11-26	Ctrl
104.04595	7.83845	15	7.533642587722059	2020-11-12	LMB			0.0	9.89733	15	inf	2020-11-26	Ctrl
125.1221	9.15623	15	7.317835937855903	2020-11-12	LMB			95.05541	7.42318	15	7.809318796268409	2020-11-26	Ctrl
120.56566000000001	9.98949	15	8.285518446960767	2020-11-12	LMB			93.45251999999999	7.17535	15	7.678070104476584	2020-11-26	Ctrl
106.09221000000001	9.64296	15	9.089225306928755	2020-11-12	LMB			97.90736	7.425439999999999	15	7.584148934257852	2020-11-26	Ctrl
128.21081999999998	10.167010000000001	15	7.929915743460655	2020-11-12	LMB			114.87621999999999	9.03081	30	7.861339796870058	2020-05-27	Ctrl
123.88917	10.17652	15	8.214212751606942	2020-11-12	LMB			121.66673999999999	9.76249	30	8.023959547202466	2020-05-27	Ctrl
128.85076999999998	9.69852	15	7.526939885574608	2020-11-12	LMB			107.40791999999999	8.96388	30	8.345641550455497	2020-05-27	Ctrl
125.13112	9.40713	15	7.517818109515843	2020-11-12	LMB			108.97636999999999	8.40827	30	7.715681849193546	2020-05-27	Ctrl
130.16425	9.54148	15	7.33033839936849	2020-11-12	LMB			110.13378	7.92365	30	7.194568278687973	2020-05-27	Ctrl
103.54948	7.7687800000000005	15	7.5024809395469685	2020-11-12	LMB			110.45326999999999	7.65153	30	6.927391103948304	2020-05-27	Ctrl
88.43205	7.6732	15	8.676944614537375	2020-11-12	LMB			104.23991	8.63162	30	8.280532859247481	2020-05-27	Ctrl
109.16044	9.6614	15	8.850642228997978	2020-11-12	LMB			107.72571	8.000810000000001	30	7.427019975083015	2020-05-27	Ctrl
109.5264	7.65716	15	6.991154643994507	2020-11-12	LMB			123.21556000000001	9.93442	30	8.062634297161818	2020-05-27	Ctrl
118.33766000000001	9.223189999999999	15	7.79396009689561	2020-11-12	LMB			112.06928	10.34465	30	9.230584866789542	2020-05-27	Ctrl
130.46572	10.72166	15	8.217990135646358	2020-11-26	LMB			99.85387	7.8373800000000005	30	7.848849523809143	2020-05-27	Ctrl
120.82048	10.645480000000001	15	8.810989660031147	2020-11-26	LMB			107.86992	8.275910000000001	30	7.672120272268675	2020-05-27	Ctrl
91.11375	7.662710000000001	15	8.410047879710802	2020-11-26	LMB			102.97941	8.491769999999999	30	8.24608530967501	2020-05-27	Ctrl
90.32051	7.86698	15	8.710070392649465	2020-11-26	LMB			120.96432	8.6077	30	7.11589996124477	2020-05-27	Ctrl
111.70755	9.26727	15	8.296010430807945	2020-11-26	LMB			118.6088	8.72614	30	7.357076372073572	2020-05-27	Ctrl
90.06298000000001	8.61031	15	9.560321010919248	2020-11-26	LMB			117.15813999999999	8.6792	30	7.40810668383776	2020-05-27	Ctrl
94.42896999999999	8.24864	15	8.735285368462666	2020-11-26	LMB			102.38374	8.58713	30	8.38720093639869	2020-05-27	Ctrl
131.20597	12.05321	15	9.186479853012784	2020-11-26	LMB			109.32927	8.31329	30	7.603901498656308	2020-05-27	Ctrl
87.41813	7.86585	15	8.997961864432469	2020-11-26	LMB			99.3483	7.86825	30	7.919863752072255	2020-05-27	Ctrl
171.35752	12.74957	15	7.440332936657814	2020-11-26	LMB			98.60858	7.479189999999999	30	7.584725385965398	2020-05-27	Ctrl
143.34534	12.33553	15	8.605462863320149	2020-11-26	LMB			98.93471	8.11097	30	8.198305731123082	2020-05-27	Ctrl
121.08537	10.21746	15	8.43822833427358	2020-11-26	LMB			103.61799	8.16831	30	7.883100222268353	2020-05-27	Ctrl
140.3824	12.532760000000001	15	8.927586364102623	2020-11-26	LMB			111.76597	9.48728	30	8.488522937706353	2020-05-27	Ctrl
95.0895	8.15478	15	8.575899547268627	2020-11-26	LMB			97.87803000000001	8.02557	30	8.199562251099659	2020-05-27	Ctrl
96.27539	7.89727	15	8.202792011541058	2020-11-26	LMB			109.67545	8.63074	30	7.869345418687591	2020-05-27	Ctrl
100.39243	8.41877	15	8.385861364248282	2020-11-26	LMB			91.39047	7.4924	30	8.198228983831685	2020-05-27	Ctrl
128.65443	9.27197	15	7.206879700916635	2020-11-26	LMB			117.68276999999999	10.0287	30	8.521808247715448	2020-05-27	Ctrl
128.57716000000002	9.27197	15	7.211210762471343	2020-11-26	LMB			107.65236000000002	9.065380000000001	30	8.420976558247306	2020-05-27	Ctrl
88.8307	8.1883	15	9.217871749293883	2020-11-26	LMB			107.57091000000001	9.416319999999999	30	8.753593327415373	2020-05-27	Ctrl
117.44463	10.1893	15	8.675833028721705	2020-11-26	LMB			104.15841999999999	8.63764	30	8.292790923671845	2020-05-27	Ctrl
105.74798999999999	10.3473	15	9.784866832929875	2020-11-26	LMB			111.15178999999999	9.06357	30	8.154227655712969	2020-05-27	Ctrl
126.17156000000001	10.10312	15	8.007446369054959	2020-11-26	LMB			126.33901000000002	10.395769999999999	30	8.228471950191787	2020-05-27	Ctrl
147.06378	10.697389999999999	15	7.273980037776805	2020-11-26	LMB			114.65227	8.9325	30	7.790949102010801	2020-11-26	Ctrl
97.69759	9.18287	15	9.399279961767736	2020-11-26	LMB			149.48426	11.69993	30	7.826864179546394	2020-11-26	Ctrl
113.46793000000001	8.61692	15	7.594145764358263	2020-11-26	LMB			97.19803	8.37548	30	8.616923614604122	2020-11-26	Ctrl
94.75441	8.521930000000001	15	8.993702773306278	2020-11-26	LMB			97.18942	8.10673	30	8.34116511859007	2020-11-26	Ctrl
152.99016	13.52926	15	8.843222335344967	2020-11-26	LMB			128.08491	10.329410000000001	30	8.064501899560222	2020-11-26	Ctrl
111.34877	9.7534	15	8.759324418222132	2020-11-26	LMB			119.51305	9.60374	30	8.035724968946905	2020-11-26	Ctrl
103.75376	9.283669999999999	15	8.947791386066392	2020-11-26	LMB			134.73155	10.645669999999999	30	7.901393548875523	2020-11-26	Ctrl
88.50005	8.25652	15	9.329395859098385	2020-11-26	LMB			141.15989	11.47688	30	8.130411549626455	2020-11-26	Ctrl
94.66009	8.37223	15	8.844519374532604	2020-11-26	LMB			152.26573	11.10026	30	7.290057979559814	2020-11-26	Ctrl
92.60834	8.07036	15	8.714506706415428	2020-11-26	LMB			131.8854	9.81628	30	7.443037667550768	2020-11-26	Ctrl
84.6883	7.634710000000001	15	9.015070558743062	2020-11-26	LMB			115.77625	8.92804	30	7.711460683862191	2020-11-26	Ctrl
155.74722	12.50933	15	8.031815912990293	2020-11-26	LMB			115.4846	9.85724	30	8.535544999073469	2020-11-26	Ctrl
147.45969	13.718770000000001	15	9.303403526753652	2020-11-26	LMB			117.58701	8.84522	30	7.522276482750942	2020-11-26	Ctrl
102.03443	8.83588	15	8.659704376258093	2020-11-26	LMB			119.62042	9.92712	30	8.298850647740577	2020-11-26	Ctrl
105.41192	8.57625	15	8.13593946491061	2020-11-26	LMB			113.76032	8.83532	30	7.766609657919386	2020-11-26	Ctrl
96.91185	8.38317	15	8.650304374542433	2020-11-26	LMB			132.15649	8.9217	30	6.7508602869219665	2020-11-26	Ctrl
139.48092	12.22429	15	8.76413060653744	2020-11-26	LMB			114.30291000000001	9.151489999999999	30	8.006349094699337	2020-11-26	Ctrl
106.38058000000001	9.885660000000001	30	9.292729932474519	2020-05-27	LMB			128.86681000000002	10.645	30	8.260466756335475	2020-11-26	Ctrl
101.81711	8.763010000000001	30	8.606618278597773	2020-05-27	LMB			130.98635	10.00806	30	7.640536590263032	2020-11-26	Ctrl
116.95602	9.28894	30	7.942250428836412	2020-05-27	LMB			162.9845	11.02631	30	6.76525068334719	2020-11-26	Ctrl
100.39849	8.95825	30	8.922693956851344	2020-05-27	LMB			142.91173	10.63825	30	7.443930599678556	2020-11-26	Ctrl
97.59956	9.41778	30	9.649408255529021	2020-05-27	LMB			98.99385	7.948010000000001	30	8.02879168756443	2020-11-26	Ctrl
104.24414	8.59222	30	8.242400963737625	2020-05-27	LMB			99.80766	7.71842	30	7.733294218099092	2020-11-26	Ctrl
123.54123999999999	11.20585	30	9.070533855739185	2020-05-27	LMB			105.3211	8.34753	30	7.925790748482498	2020-11-26	Ctrl
116.68003999999999	10.77103	30	9.231253263197374	2020-05-27	LMB			124.238	9.6773	45	7.789323717381156	2020-05-27	Ctrl
105.78711000000001	10.5251	30	9.949321803006056	2020-05-27	LMB			134.77372	10.45722	45	7.759094280398285	2020-05-27	Ctrl
114.19366000000001	10.43518	30	9.138143045769791	2020-05-27	LMB			115.6609	10.02975	45	8.671685937079861	2020-05-27	Ctrl
190.58977	16.16506	30	8.48159898613656	2020-05-27	LMB			116.80208999999999	8.794189999999999	45	7.529137535124585	2020-05-27	Ctrl
112.25161999999999	10.03169	30	8.93678861828453	2020-05-27	LMB			118.37751000000002	8.878110000000001	45	7.499828303535021	2020-05-27	Ctrl
148.68938	6.8138	30	4.582573415801451	2020-05-27	LMB			121.23845	8.40508	45	6.932685134130303	2020-05-27	Ctrl
143.62181999999999	10.93941	30	7.6168161634492595	2020-05-27	LMB			115.11373999999999	9.43672	45	8.197735561367391	2020-05-27	Ctrl
124.96283999999999	9.83813	30	7.872844439194885	2020-05-27	LMB			117.42228999999999	9.215489999999999	45	7.848160685675607	2020-05-27	Ctrl
116.01182	10.22921	30	8.817386021527806	2020-11-12	LMB			116.75802	9.615910000000001	45	8.235759736247669	2020-05-27	Ctrl
117.02448999999999	8.88433	30	7.5918553458340226	2020-11-12	LMB			109.02761000000001	9.0091	45	8.263136282635196	2020-05-27	Ctrl
119.84771	9.787460000000001	30	8.166580738171803	2020-11-12	LMB			116.15586	9.02848	45	7.772728814542804	2020-05-27	Ctrl
117.46789	9.25128	30	7.875581999472366	2020-11-12	LMB			113.81328	8.77815	45	7.712764274959829	2020-05-27	Ctrl
101.1788	8.406880000000001	30	8.30893428267582	2020-11-12	LMB			132.77358999999998	10.04238	45	7.5635372968374215	2020-05-27	Ctrl
132.44994	10.92197	30	8.246111700767852	2020-11-12	LMB			129.90216999999998	9.35197	45	7.19924078250579	2020-05-27	Ctrl
146.29211999999998	11.986289999999999	30	8.193394148639038	2020-11-12	LMB			128.36694	8.90691	45	6.938632330099947	2020-05-27	Ctrl
110.95733999999999	9.70208	30	8.743973134179317	2020-11-12	LMB			108.2897	9.02604	45	8.335086347085642	2020-05-27	Ctrl
103.9714	9.25778	30	8.90416018251173	2020-11-12	LMB			117.07323999999998	9.364939999999999	45	7.999214850464547	2020-05-27	Ctrl
107.18347	9.13636	30	8.524038268214305	2020-11-12	LMB			107.03401000000001	8.47584	45	7.918828790960928	2020-05-27	Ctrl
111.88535	9.346789999999999	30	8.353899773294716	2020-11-12	LMB			105.58856999999999	8.02887	45	7.603919628800731	2020-05-27	Ctrl
136.01049	10.63753	30	7.821109974679159	2020-11-12	LMB			107.64571000000001	9.07222	45	8.427850956624281	2020-05-27	Ctrl
129.04944	11.18051	30	8.663741586170385	2020-11-12	LMB			113.21455	8.84246	45	7.810356531028919	2020-05-27	Ctrl
114.79172	11.044260000000001	30	9.621129468222971	2020-11-12	LMB			120.15493000000001	10.449639999999999	45	8.696805033301587	2020-05-27	Ctrl
138.23548	11.814219999999999	30	8.546445529034948	2020-11-12	LMB			106.78171999999999	8.34918	45	7.818922564648706	2020-05-27	Ctrl
134.32775	11.959710000000001	30	8.903379979192684	2020-11-12	LMB			120.33478999999998	9.17716	45	7.626356434411031	2020-05-27	Ctrl
138.96121000000002	11.06365	30	7.961682256508848	2020-11-12	LMB			99.89709	8.61507	45	8.623944901698337	2020-05-27	Ctrl
130.58236000000002	10.90578	30	8.351648721925379	2020-11-12	LMB			126.61596000000002	9.9248	45	7.838506298889964	2020-05-27	Ctrl
137.83415	11.22408	30	8.14317786992556	2020-11-12	LMB			116.95109	9.7548	45	8.340922688279347	2020-05-27	Ctrl
108.67728000000001	8.32784	30	7.662908015364388	2020-11-12	LMB			116.39241000000001	9.80584	45	8.424810518142891	2020-05-27	Ctrl
92.70936	8.656369999999999	30	9.337104689321551	2020-11-12	LMB			112.29563	9.39086	45	8.362622837593948	2020-05-27	Ctrl
116.14504	10.71894	30	9.228926177131628	2020-11-12	LMB			120.02429	9.51953	45	7.931336232024368	2020-05-27	Ctrl
118.72463	9.00637	30	7.585932253484387	2020-11-12	LMB			133.49998	10.96288	45	8.211896361332789	2020-05-27	Ctrl
128.63666	11.17457	30	8.68692486263247	2020-11-12	LMB			126.99758	9.9077	45	7.801487240937977	2020-11-26	Ctrl
140.4588	12.16974	30	8.664277353928696	2020-11-26	LMB			104.44258	8.16493	45	7.817625723148547	2020-11-26	Ctrl
132.06009	11.60113	30	8.784735797166276	2020-11-26	LMB			108.02906000000002	8.51548	45	7.882582705061026	2020-11-26	Ctrl
94.43365	7.73491	30	8.190840870812469	2020-11-26	LMB			137.88851	10.31282	45	7.479100325328049	2020-11-26	Ctrl
95.34013	8.47835	30	8.89274012947119	2020-11-26	LMB			129.00231000000002	10.29545	45	7.9808260797810515	2020-11-26	Ctrl
120.79295	10.399289999999999	30	8.609186214923966	2020-11-26	LMB			144.76169	11.11322	45	7.676906783832105	2020-11-26	Ctrl
92.99671	9.33355	30	10.036430321029638	2020-11-26	LMB			149.82413	11.66484	45	7.785688460196631	2020-11-26	Ctrl
100.78195	9.5361	30	9.46211102285677	2020-11-26	LMB			143.6689	10.35823	45	7.209792794404357	2020-11-26	Ctrl
141.97926	12.90355	30	9.088334451102224	2020-11-26	LMB			124.96618000000001	10.01008	45	8.010231248166503	2020-11-26	Ctrl
95.09595999999999	8.518880000000001	30	8.95819338697459	2020-11-26	LMB			124.59357	9.61955	45	7.720743534357351	2020-11-26	Ctrl
131.05341	11.35961	30	8.66792401662803	2020-11-26	LMB			124.20992	9.70698	45	7.814979673121116	2020-11-26	Ctrl
149.2679	14.281939999999999	30	9.567991510565902	2020-11-26	LMB			129.02806	10.31884	45	7.997361194146451	2020-11-26	Ctrl
102.19668	9.25879	30	9.059775718741546	2020-11-26	LMB			121.70936999999999	9.3483	45	7.680838377521797	2020-11-26	Ctrl
105.09272	9.45454	30	8.996379577957445	2020-11-26	LMB			140.99086	9.87076	45	7.000992830315384	2020-11-26	Ctrl
107.96688	9.46076	30	8.762650175683506	2020-11-26	LMB			120.26958	9.24315	45	7.685359839121414	2020-11-26	Ctrl
132.81024	10.77113	30	8.110165300506948	2020-11-26	LMB			138.27773	10.55584	45	7.63379612899344	2020-11-26	Ctrl
132.8114	10.77113	30	8.11009446478239	2020-11-26	LMB			137.22653	10.6527	45	7.762857517420283	2020-11-26	Ctrl
93.82972	8.95294	30	9.541688923296372	2020-11-26	LMB			172.06823	11.76839	45	6.839374125020057	2020-11-26	Ctrl
125.97591000000001	11.436110000000001	30	9.078013407484018	2020-11-26	LMB			157.82802	11.559239999999999	45	7.323946660421894	2020-11-26	Ctrl
112.97845	11.19535	30	9.909279158990055	2020-11-26	LMB			108.3449	8.213289999999999	45	7.580689077196987	2020-11-26	Ctrl
134.70961	11.54217	30	8.568186041070122	2020-11-26	LMB			104.98082	8.23288	45	7.842270616670741	2020-11-26	Ctrl
167.76203	11.75183	30	7.00505948813328	2020-11-26	LMB			108.29866000000001	8.76914	45	8.097182365875994	2020-11-26	Ctrl
100.24476	9.50131	30	9.47811137459953	2020-11-26	LMB			129.24941	10.06867	60	7.790109061232851	2020-05-27	Ctrl
119.51666999999999	9.86306	30	8.252455494283769	2020-11-26	LMB			146.53802	11.00733	60	7.511586412864047	2020-05-27	Ctrl
99.4452	8.98757	30	9.037711221858872	2020-11-26	LMB			124.79845	10.06996	60	8.068978420805706	2020-05-27	Ctrl
166.00202	14.78175	30	8.90456031800095	2020-11-26	LMB			125.6747	9.54555	60	7.595442837739021	2020-05-27	Ctrl
122.22996	11.16305	30	9.13282635452061	2020-11-26	LMB			126.9204	9.604410000000001	60	7.567270509705296	2020-05-27	Ctrl
113.43552	10.693810000000001	30	9.427214685488286	2020-11-26	LMB			126.59925	8.71331	60	6.882592116461986	2020-05-27	Ctrl
95.7487	8.91145	30	9.30712375207183	2020-11-26	LMB			121.19712	9.9624	60	8.219997306866698	2020-05-27	Ctrl
103.73281	9.98444	30	9.625151386528524	2020-11-26	LMB			124.9873	9.89661	60	7.918092478195785	2020-05-27	Ctrl
100.89907	8.59806	30	8.521446233349822	2020-11-26	LMB			123.38586000000001	10.217210000000001	60	8.280697642339245	2020-05-27	Ctrl
89.68626	8.79071	30	9.801624016878394	2020-11-26	LMB			116.12628000000001	9.07887	60	7.818101122329932	2020-05-27	Ctrl
129.81347	13.2179	30	10.182225311441101	2020-11-26	LMB			126.50554	9.61375	60	7.599469556827314	2020-05-27	Ctrl
122.96166000000001	10.3501	30	8.417339193371332	2020-11-26	LMB			119.00469	10.05563	60	8.449776223105157	2020-05-27	Ctrl
142.66804	12.47007	30	8.740619132357885	2020-11-26	LMB			139.18628	10.68259	60	7.67503090103421	2020-05-27	Ctrl
137.16555	12.929960000000001	30	9.426536036198595	2020-11-26	LMB			138.12473	10.047939999999999	60	7.274540916749665	2020-05-27	Ctrl
115.38153	10.82209	30	9.379395471701578	2020-11-26	LMB			133.18896999999998	10.095360000000001	60	7.57972675965585	2020-05-27	Ctrl
115.66502	10.67328	30	9.227750965676572	2020-11-26	LMB			115.38876	8.651660000000001	60	7.497836011063817	2020-05-27	Ctrl
167.32828	14.341239999999999	30	8.570720980338768	2020-11-26	LMB			128.6867	9.99261	60	7.76506818497949	2020-05-27	Ctrl
159.66686	14.92175	30	9.345552358203824	2020-11-26	LMB			113.69037	9.36393	60	8.23634402808259	2020-05-27	Ctrl
108.55944	9.801969999999999	30	9.02912726889527	2020-11-26	LMB			113.89133000000001	8.63795	60	7.584378898727409	2020-05-27	Ctrl
114.68737	9.51037	30	8.292430108040667	2020-11-26	LMB			118.10479	10.05995	60	8.517817101236963	2020-05-27	Ctrl
102.63606	9.093160000000001	30	8.859615226851071	2020-11-26	LMB			124.03101000000001	9.36178	60	7.547934988193678	2020-05-27	Ctrl
153.209	13.43245	30	8.767402698274905	2020-11-26	LMB			134.7718	10.98663	60	8.152024384923255	2020-05-27	Ctrl
116.91965	10.573210000000001	45	9.043142021037525	2020-05-27	LMB			115.40144	9.32966	60	8.084526501575718	2020-05-27	Ctrl
110.6453	9.719380000000001	45	8.784268287943545	2020-05-27	LMB			128.2802	9.96354	60	7.767013147781185	2020-05-27	Ctrl
126.55497	10.39284	45	8.212115257109222	2020-05-27	LMB			107.12265	9.32271	60	8.702837355125178	2020-05-27	Ctrl
108.1677	9.87088	45	9.125533777643419	2020-05-27	LMB			135.34068	10.6826	60	7.893118314463915	2020-05-27	Ctrl
104.31326999999999	9.954989999999999	45	9.543359152675398	2020-05-27	LMB			127.58851000000001	10.67552	60	8.3671484211235	2020-05-27	Ctrl
108.05847	9.60811	45	8.891584343180133	2020-05-27	LMB			126.18574	10.739889999999999	60	8.511175668502636	2020-05-27	Ctrl
133.59036	12.403319999999999	45	9.284592091824589	2020-05-27	LMB			124.00258000000001	9.776060000000001	60	7.8837553218650775	2020-05-27	Ctrl
120.38833999999999	12.08103	45	10.035049905995882	2020-05-27	LMB			128.02646000000001	10.0721	60	7.867201826872351	2020-05-27	Ctrl
108.58371000000001	12.18441	45	11.221213568775648	2020-05-27	LMB			137.92305	10.99186	60	7.969559837895118	2020-05-27	Ctrl
122.46947	11.54319	45	9.425361275753051	2020-05-27	LMB			132.35233	10.07294	60	7.610700922303369	2020-11-26	Ctrl
206.85509	17.24964	45	8.338997121124745	2020-05-27	LMB			110.08713999999999	9.3607	60	8.502991357573645	2020-11-26	Ctrl
117.58393000000001	11.641060000000001	45	9.900213405012064	2020-05-27	LMB			120.41713999999999	9.406360000000001	60	7.811479329271565	2020-11-26	Ctrl
159.24862	13.92293	45	8.742888949367348	2020-05-27	LMB			146.34066	10.33597	60	7.062951608937666	2020-11-26	Ctrl
148.37486	12.298639999999999	45	8.288897458774349	2020-05-27	LMB			137.6135	11.21274	60	8.147994201150325	2020-11-26	Ctrl
132.88907	10.6471	45	8.012020853182282	2020-05-27	LMB			159.24472	12.37883	60	7.773463383903717	2020-11-26	Ctrl
123.05053999999998	11.569180000000001	45	9.40197418069031	2020-11-12	LMB			150.96868999999998	11.250860000000001	60	7.45244593431923	2020-11-26	Ctrl
123.16093000000001	10.300939999999999	45	8.363804982635319	2020-11-12	LMB			131.1849	10.23338	60	7.800730114517754	2020-11-26	Ctrl
129.47271	10.74656	45	8.300251072214367	2020-11-12	LMB			133.00143	10.586780000000001	60	7.9598993785254795	2020-11-26	Ctrl
125.79985	10.383469999999999	45	8.253960557186673	2020-11-12	LMB			132.48909	9.953439999999999	60	7.512648777344609	2020-11-26	Ctrl
109.6757	9.76967	45	8.90777993666783	2020-11-12	LMB			137.49313999999998	11.13611	60	8.099393176997777	2020-11-26	Ctrl
145.07433	12.10764	45	8.345818312585003	2020-11-12	LMB			128.71952	9.7061	60	7.54050356931101	2020-11-26	Ctrl
155.02056000000002	13.301979999999999	45	8.58078438111693	2020-11-12	LMB			153.07755	11.11185	60	7.258967758498878	2020-11-26	Ctrl
117.52017	11.089160000000001	45	9.43596320529489	2020-11-12	LMB			130.84601	10.355139999999999	60	7.913989887807812	2020-11-26	Ctrl
110.10735	10.02643	45	9.106049686964585	2020-11-12	LMB			144.93225	12.10217	60	8.350225708908816	2020-11-26	Ctrl
117.66993000000001	10.57646	45	8.988243640495071	2020-11-12	LMB			147.48609	11.27818	60	7.646944874598005	2020-11-26	Ctrl
117.12926999999999	10.69063	45	9.127206205588067	2020-11-12	LMB			182.98427	12.996210000000001	60	7.102364591229618	2020-11-26	Ctrl
143.6218	12.3184	45	8.576970905531056	2020-11-12	LMB			163.40823999999998	12.9644	60	7.933749240552375	2020-11-26	Ctrl
135.88197	11.76626	45	8.659176784086954	2020-11-12	LMB			116.2226	8.60995	60	7.408154696246685	2020-11-26	Ctrl
121.21001000000001	11.59334	45	9.564672092676174	2020-11-12	LMB			113.20127	8.83367	60	7.803507858171556	2020-11-26	Ctrl
157.39148	12.803889999999999	45	8.135059153138403	2020-11-12	LMB			116.80963	9.275739999999999	60	7.940903502562245	2020-11-26	Ctrl
143.98865	13.249310000000001	45	9.201634989980112	2020-11-12	LMB
147.04008000000002	13.00687	45	8.845799050163736	2020-11-12	LMB
140.61508	11.83883	45	8.41931747291969	2020-11-12	LMB
146.08642	12.35324	45	8.456117960861796	2020-11-12	LMB
116.48463000000001	9.52228	45	8.174709401575127	2020-11-12	LMB
98.43259	9.36359	45	9.512692899780449	2020-11-12	LMB
127.4226	4.41749	45	3.4668025923187877	2020-11-12	LMB
123.8115	10.72288	45	8.660649455018314	2020-11-12	LMB
136.5931	12.48652	45	9.141398796864557	2020-11-12	LMB
142.92526	13.070210000000001	45	9.144786582861562	2020-11-26	LMB
138.27931999999998	12.90025	45	9.329124557453712	2020-11-26	LMB
98.90641	9.05216	45	9.152248069665053	2020-11-26	LMB
101.967	9.67298	45	9.486382849353223	2020-11-26	LMB
126.42461999999999	11.10997	45	8.787821549315316	2020-11-26	LMB
99.70976	10.65369	45	10.684701276986324	2020-11-26	LMB
107.3044	9.784360000000001	45	9.118321336310535	2020-11-26	LMB
149.79491000000002	13.07372	45	8.72774649018448	2020-11-26	LMB
99.87046	9.178230000000001	45	9.190134900750433	2020-11-26	LMB
134.88773	12.141910000000001	45	9.001493315959873	2020-11-26	LMB
155.83165	15.190970000000002	45	9.748321345503307	2020-11-26	LMB
108.00516	10.30695	45	9.543016278111159	2020-11-26	LMB
112.37203999999998	10.2269	45	9.100929377094161	2020-11-26	LMB
110.07576	10.00606	45	9.09015754240534	2020-11-26	LMB
132.25168	10.922310000000001	45	8.258730626333067	2020-11-26	LMB
132.06589	10.922310000000001	45	8.270348990189671	2020-11-26	LMB
98.07959	9.92275	45	10.117038621389018	2020-11-26	LMB
132.22308	13.049610000000001	45	9.869388914552589	2020-11-26	LMB
119.45858999999999	11.673160000000001	45	9.77172089508172	2020-11-26	LMB
142.62078	12.64724	45	8.867740030590213	2020-11-26	LMB
181.56131000000002	13.700679999999998	45	7.546035000518556	2020-11-26	LMB
106.40815	10.17445	45	9.56172060128853	2020-11-26	LMB
126.05583999999999	10.95345	45	8.689363380546274	2020-11-26	LMB
104.55597	10.0913	45	9.651577045289715	2020-11-26	LMB
126.04942	11.18144	45	8.87067945255123	2020-11-26	LMB
120.59893999999998	11.74515	45	9.739015948233046	2020-11-26	LMB
100.62652	9.645389999999999	45	9.585335953186098	2020-11-26	LMB
110.4664	10.73126	45	9.714501423057147	2020-11-26	LMB
103.87804	9.552610000000001	45	9.195985985103302	2020-11-26	LMB
95.17696	9.43797	45	9.91623392888363	2020-11-26	LMB
136.24346	5.7442400000000005	45	4.21615833890302	2020-11-26	LMB
126.69193999999999	10.77794	45	8.507202589209701	2020-11-26	LMB
149.18778	14.127070000000002	45	9.469321146812428	2020-11-26	LMB
146.90256000000002	13.483120000000001	45	9.178274360909707	2020-11-26	LMB
125.45731	11.60378	45	9.249186037864195	2020-11-26	LMB
122.11103	11.71717	45	9.59550500884318	2020-11-26	LMB
175.9543	15.68341	45	8.9133428395896	2020-11-26	LMB
167.56633	14.926770000000001	45	8.907976918752116	2020-11-26	LMB
113.27763	10.38452	45	9.16731750125775	2020-11-26	LMB
121.87675	10.32039	45	8.46789071746662	2020-11-26	LMB
108.23306000000001	10.36699	45	9.57839499317491	2020-11-26	LMB
157.40666000000002	14.282739999999999	45	9.073783790342796	2020-11-26	LMB
123.0872	11.48042	60	9.327062440286237	2020-05-27	LMB
116.40481000000001	10.553	60	9.065776577445554	2020-05-27	LMB
135.80799	11.690389999999999	60	8.608028143263148	2020-05-27	LMB
115.74519	10.88562	60	9.404814143896605	2020-05-27	LMB
111.73212	11.877	60	10.629888701655354	2020-05-27	LMB
123.02942	10.1197	60	8.225430957896087	2020-05-27	LMB
142.14782	13.07427	60	9.197657762180244	2020-05-27	LMB
129.31561000000002	12.64986	60	9.78216009652663	2020-05-27	LMB
114.88595	13.39525	60	11.659606766536728	2020-05-27	LMB
127.06618	11.714080000000001	60	9.21888105867352	2020-05-27	LMB
215.11795	18.78144	60	8.730763750770217	2020-05-27	LMB
126.84346000000001	11.585510000000001	60	9.133707011776563	2020-05-27	LMB
168.56128999999999	14.77498	60	8.765345827621514	2020-05-27	LMB
155.8863	13.508379999999999	60	8.665533789691588	2020-05-27	LMB
141.27764	11.42948	60	8.090084177510327	2020-05-27	LMB
148.45851000000002	13.04673	60	8.788132118529276	2020-11-12	LMB
125.32895	10.922080000000001	60	8.714730315701201	2020-11-12	LMB
135.51199	11.98967	60	8.847682039057947	2020-11-12	LMB
132.12579	12.05467	60	9.123631351608191	2020-11-12	LMB
114.83962	10.88855	60	9.481527368342041	2020-11-12	LMB
152.12113	13.599479999999998	60	8.939902037277793	2020-11-12	LMB
123.33464	11.27625	60	9.142808541055457	2020-11-12	LMB
114.73846	10.59379	60	9.232989531147622	2020-11-12	LMB
120.2382	11.07235	60	9.208679105309296	2020-11-12	LMB
124.92204	11.14032	60	8.917817864645823	2020-11-12	LMB
153.62294	13.38662	60	8.713945977078684	2020-11-12	LMB
148.93129	13.648729999999999	60	9.164447578477295	2020-11-12	LMB
130.44295	12.642439999999999	60	9.691930456954553	2020-11-12	LMB
163.71258	14.300839999999999	60	8.73533359501145	2020-11-12	LMB
147.53856000000002	13.36493	60	9.058601358180532	2020-11-12	LMB
153.97996	13.787170000000001	60	8.953872958533045	2020-11-12	LMB
149.29074	5.2151	60	3.493250820513047	2020-11-12	LMB
155.78773	13.358939999999999	60	8.575091247558454	2020-11-12	LMB
123.44885	10.813310000000001	60	8.759344457238768	2020-11-12	LMB
103.99663000000001	10.642430000000001	60	10.233437371960996	2020-11-12	LMB
134.92592	12.72103	60	9.428158800028935	2020-11-12	LMB
129.67924	11.82757	60	9.120634883424673	2020-11-12	LMB
143.09614	13.08164	60	9.141853861327078	2020-11-12	LMB
150.48885	13.70474	60	9.106814225771542	2020-11-26	LMB
146.78669	13.57	60	9.244707405010631	2020-11-26	LMB
100.38833000000001	9.33613	60	9.300015250776658	2020-11-26	LMB
108.25191000000001	10.17738	60	9.40157083602497	2020-11-26	LMB
133.3403	12.15081	60	9.112631365011177	2020-11-26	LMB
103.74022	10.251439999999999	60	9.881837536107017	2020-11-26	LMB
112.16721000000001	10.38868	60	9.261779801779861	2020-11-26	LMB
154.17623	14.2886	60	9.267706182723499	2020-11-26	LMB
102.38433	9.56759	60	9.344779616177592	2020-11-26	LMB
141.8957	12.560880000000001	60	8.852192138310041	2020-11-26	LMB
113.29668999999998	10.94229	60	9.658084450657828	2020-11-26	LMB
117.94591000000001	10.44945	60	8.859527218875161	2020-11-26	LMB
117.68121000000001	10.5924	60	9.000927165857659	2020-11-26	LMB
144.06635	12.21498	60	8.478718312777412	2020-11-26	LMB
144.06603	12.21498	60	8.478737145737965	2020-11-26	LMB
101.85307	9.75729	60	9.579770153221693	2020-11-26	LMB
136.84073999999998	6.022930000000001	60	4.401415835664146	2020-11-26	LMB
125.62346000000001	12.736469999999999	60	10.1386078683074	2020-11-26	LMB
151.69079	13.532960000000001	60	8.921411774571153	2020-11-26	LMB
196.61574	14.39923	60	7.323538797046463	2020-11-26	LMB
112.31746000000001	11.369769999999999	60	10.122887394355248	2020-11-26	LMB
129.92333	11.80127	60	9.083257025508814	2020-11-26	LMB
111.13902	11.30665	60	10.17342963794354	2020-11-26	LMB
132.54052	12.38455	60	9.343972696047972	2020-11-26	LMB
123.04385	12.24334	60	9.950387605719424	2020-11-26	LMB
105.32288999999999	10.33907	60	9.816546051860142	2020-11-26	LMB
115.26548999999999	11.4952	60	9.972802787720767	2020-11-26	LMB
109.17006	9.7638	60	8.94366092681455	2020-11-26	LMB
100.36279	9.8092	60	9.773741841971512	2020-11-26	LMB
141.19378999999998	13.661829999999998	60	9.675942546764981	2020-11-26	LMB
130.2304	11.58939	60	8.899143364375753	2020-11-26	LMB
159.62957	13.738179999999998	60	8.60628766963414	2020-11-26	LMB
156.16693999999998	14.03113	60	8.984699322404602	2020-11-26	LMB
130.07675	11.91635	60	9.161014554868567	2020-11-26	LMB
128.76496	11.99447	60	9.315010853884472	2020-11-26	LMB
115.11455	11.18277	60	9.71447136786792	2020-11-26	LMB
126.83055	10.64339	60	8.391818848061448	2020-11-26	LMB
111.02824	10.281130000000001	60	9.259923421284531	2020-11-26	LMB
161.35248	14.97195	60	9.279033083346471	2020-11-26	LMB
