# Supplementary material for: Control of nuclear size by osmotic forces in Schizosaccharomyces pombe
Source: eLife. 2022 Jul 20;11:e76075. doi: 10.7554/eLife.76075 (PMC9410708; doi:10.7554/eLife.76075)
Supplement: Figure 5—source data 2. — Related to Figure 5F, Figure 5—figure supplement 1. [file elife-76075-fig5-data2.xlsx]

## Sheet: Sheet1
Mean Int. Cyto	Mean Int. Nucl	Condition	subunit
47.48150365	7.2942773700000005	0	rps2
43.882112989999996	7.540660709999999	0	rps2
44.53112429	8.53682143	0	rps2
38.77597175	7.696205359999999	0	rps2
52.576841810000005	10.14465179	0	rps2
44.404796610000005	10.83846429	0	rps2
50.91893785	12.40334821	0	rps2
45.63574011	7.610875	0	rps2
50.10044068	10.19933036	0	rps2
40.66532847	9.990007299999998	0	rps2
40.95273723	6.705240879999999	0	rps2
44.650985399999996	8.139817520000001	0	rps2
41.20559124	7.72060584	0	rps2
41.982897810000004	7.29470073	0	rps2
45.72135714	6.761206190000001	0	rps2
44.44275	8.311360819999999	0	rps2
43.7948866	7.75939175	0	rps2
40.13551546	7.36453608	0	rps2
43.69940206	7.75247423	0	rps2
45.369793810000004	8.338793809999999	0	rps2
44.59053608	7.5144536099999995	0	rps2
40.514030930000004	6.71209278	0	rps2
45.97538144	7.2037732	0	rps2
43.9856701	7.224484540000001	0	rps2
44.77589691	5.6871649500000006	0	rps2
45.54964948	7.5718969099999995	0	rps2
44.8618375	7.23173913	0	rps2
42.564051719999995	9.41305797	0	rps2
44.04598968999999	9.02204348	0	rps2
38.97563918	7.60921739	0	rps2
44.80350515	7.197681159999999	0	rps2
43.02118557	7.70111594	0	rps2
39.05096907	8.86421649	0	rps2
42.057886599999996	7.448711340000001	0	rps2
42.4113299	8.26815464	0	rps2
43.93666964	5.57516964	0	rps2
42.889875	6.417875	0	rps2
36.49229464	8.28354464	0	rps2
44.6531	8.58125	0	rps2
44.047546389999994	7.6028866	0	rps2
44.20846392	7.814793809999999	0	rps2
42.650371129999996	9.761484540000001	0	rps2
38.01990179	5.86376786	0	rps2
37.53903571	6.48098214	0	rps2
37.50316071	6.04808036	0	rps2
40.241710139999995	7.04692754	0	rps2
37.595783510000004	8.287680409999998	0	rps2
36.43495876	7.751195879999999	0	rps2
40.92948454	6.85307216	0	rps2
44.29209278	8.09203093	0	rps2
47.55868041	9.059371129999999	0	rps2
33.900989689999996	8.74226804	0	rps2
43.02036082	6.8606701	0	rps2
40.14431959	7.3788865999999995	0	rps2
42.398961539999995	7.3423653799999995	0	rps2
40.88117308	7.404192309999999	0	rps2
44.0950375	7.387074999999999	0	rps2
36.993175	8.686262500000002	0	rps2
46.0043913	9.53694203	0	rps2
37.968887499999994	7.2925249999999995	0	rps2
36.9013875	6.67165	0	rps2
41.0208125	7.404649999999999	0	rps2
39.9615625	6.9399625	0	rps2
43.79568116	10.07726087	0	rps2
41.063199999999995	8.8203125	0	rps2
42.604737500000006	7.7997375	0	rps2
43.140675	7.69405	0	rps2
41.2171875	9.0614875	0	rps2
41.865612500000005	7.9823249999999994	0	rps2
43.0878	6.065575	0	rps2
36.644775	6.9637125	0	rps2
34.543625	7.1927125	0	rps2
36.346987500000004	9.082375	0	rps2
43.412375	7.89245	0	rps2
44.7185625	7.5162625	0	rps2
51.4804125	6.564125	0	rps2
40.496775	8.4545625	0	rps2
45.74866667	10.55076812	0	rps2
39.27528986	7.2710434799999994	0	rps2
41.592505149999994	6.440422679999999	0	rps2
37.25510309	7.2727732	0	rps2
41.04104124	7.65607216	0	rps2
43.14204124	7.8857628900000005	0	rps2
42.99472165	8.45258763	0	rps2
47.5521134	7.60649485	0	rps2
44.35384536	7.314319590000001	0	rps2
42.65578351	7.08181443	0	rps2
46.915116069999996	7.290357140000001	15	rps2
40.88252678999999	7.600267859999999	15	rps2
40.0524375	7.37942857	15	rps2
40.151401789999994	6.84057143	15	rps2
43.69291071000001	7.376982140000001	15	rps2
41.990625	6.737848209999999	15	rps2
56.74008928999999	7.74419643	15	rps2
51.058035710000006	9.13610714	15	rps2
43.26383036	7.8483125	15	rps2
45.517964289999995	6.94817857	15	rps2
45.312714289999995	8.42107143	15	rps2
44.24307143	9.14666964	15	rps2
45.078026789999996	6.17802679	15	rps2
46.139589289999996	7.76113393	15	rps2
38.091625	6.53624107	15	rps2
38.317758930000004	7.699017859999999	15	rps2
46.62220536	5.82784821	15	rps2
45.92484821	8.129607140000001	15	rps2
47.28823214	8.09260714	15	rps2
42.89843299	7.204608250000001	15	rps2
43.91604124	6.7182577299999995	15	rps2
35.99398968999999	7.4625567	15	rps2
34.52080412	6.814463920000001	15	rps2
36.62141237	7.95896907	15	rps2
38.01494643	7.45732143	15	rps2
32.614642860000004	6.33616071	15	rps2
38.763535710000006	7.856169640000001	15	rps2
39.3001875	7.383544640000001	15	rps2
31.77488393	8.22676786	15	rps2
31.510330360000005	6.44754464	15	rps2
39.43653571	8.542160710000001	15	rps2
34.778625	7.1036125000000006	15	rps2
37.431525	5.883225	15	rps2
39.87055	7.201475	15	rps2
40.0583299	6.6822268000000005	15	rps2
33.16302062	6.875670100000001	15	rps2
35.95914433	7.35552577	15	rps2
38.070927839999996	7.86487629	15	rps2
34.94975258	6.87658763	15	rps2
39.48595876	7.74549485	15	rps2
42.30394845	7.97475258	15	rps2
35243	7.18141237	15	rps2
39.724237110000004	6.965041240000001	15	rps2
41.54485567	7.853752579999999	15	rps2
41.72517526	7.860268040000001	15	rps2
38.699391750000004	7.8211134	15	rps2
32.79215464	6.23693814	15	rps2
38.56009278	7.318701029999999	15	rps2
45.05115464	6.612690720000001	15	rps2
36.64478351	8.157752579999999	15	rps2
38.78945361	7.62536082	15	rps2
38.10420619	6.665628870000001	15	rps2
35.75464948	7.4962061900000005	15	rps2
37.19387629	7.81804124	15	rps2
41.93505155	7.309783509999999	15	rps2
38.00042268	7.2583299	15	rps2
41.891103089999994	8.91980412	15	rps2
41.058051549999995	8.454164950000001	15	rps2
37.09941667	6.11848454	15	rps2
38.09574359	5.5301987200000005	15	rps2
35994	5.82457143	15	rps2
40.53897321	8.62100893	15	rps2
40.69854464	6.9311607099999994	15	rps2
41.54382143	8.201526789999999	15	rps2
38.53248214	8.91675	15	rps2
41.60640179	7.321482140000001	15	rps2
38.61310714	7.360517859999999	15	rps2
42.868133930000006	8.164892859999998	15	rps2
34.27245536	6.96669643	15	rps2
41.75228571	7.164892859999999	15	rps2
41.73197321000001	7.568642859999999	15	rps2
35.28175	9.93692857	15	rps2
34.92429464	8.92378571	15	rps2
42.90931387	5.714309279999999	30	rps2
43.91516788	8.10506186	30	rps2
43.15959854	7.77448454	30	rps2
45.998948909999996	9.99781921	30	rps2
42.98976289	8.111195879999999	30	rps2
43.62231959	7.421288659999999	30	rps2
42.525378530000005	7.60214433	30	rps2
43.554666669999996	6.874329899999999	30	rps2
40.35885567	6.63750515	30	rps2
40.81350515	6.6596701000000005	30	rps2
40.37043299	6.343628870000001	30	rps2
35.12779381	7.9408866	30	rps2
41.66890722	7.657154640000001	30	rps2
37.594793810000006	6.74885567	30	rps2
35.27806186	7.13250515	30	rps2
36.94142268	7.67569072	30	rps2
46.2232268	7.56739175	30	rps2
47.41886598	8.73781443	30	rps2
44.812546389999994	7.602175259999999	30	rps2
39.613298969999995	6.970814429999999	30	rps2
39.63850515	8.38436082	30	rps2
39.35168041	8.24142268	30	rps2
40.78493814	8.80295876	30	rps2
41.05898969	7.196185570000001	30	rps2
45.12930928	10.74690722	30	rps2
42.726536079999995	9.26730928	30	rps2
44.35407216	7.588711340000001	30	rps2
42.87334021	7.83796907	30	rps2
38.97153608	8.12559794	30	rps2
39.728041239999996	7.7062061900000005	30	rps2
40.026845359999996	8.25326804	30	rps2
44.918319589999996	9.87782474	30	rps2
49.9781	9.166924999999999	30	rps2
42.62585567	8.557123709999999	30	rps2
42.079125	8.913825000000001	30	rps2
44453	8.3936375	30	rps2
37.73680412	7.082659790000001	30	rps2
39.5455567	7.722824740000001	30	rps2
34.40373196	7.09972165	30	rps2
39.56681443	8.577917529999999	30	rps2
38.93858763	8.92165979	30	rps2
38.294381439999995	6.830402059999999	30	rps2
31.955793810000003	8.559546390000001	30	rps2
34.27245361000001	6.49694845	30	rps2
38.5657732	9.163979379999999	30	rps2
35.474010310000004	7.9948866	30	rps2
35.98524742	10.51424742	30	rps2
29.71231959	6.9495567000000005	30	rps2
36.90795876	7707	30	rps2
39.06553608	8.08490722	30	rps2
35.43135714	6.27716071	30	rps2
35.57127679	6.21350893	30	rps2
34.78773214	6.69816964	30	rps2
31.75105357	7.187964290000001	30	rps2
32.12888393	8.10250893	30	rps2
36.99700893000001	8.19726786	30	rps2
27.434392860000003	7.365598209999999	30	rps2
29.94488393	7.47832143	30	rps2
36.26179464	7.7550267900000005	30	rps2
38.455125	7.7632375	30	rps2
40.67612371	6.91590722	45	rps2
39.448979380000004	8.09580412	45	rps2
40.1694433	8.175474229999999	45	rps2
53.6046701	10.629463920000001	45	rps2
46.45272165	9.47258763	45	rps2
44.26424742	8.943742270000001	45	rps2
43.215072160000005	7.44603093	45	rps2
40.05083505	7.11192784	45	rps2
44.33574227	7.4601237099999995	45	rps2
45.34782473999999	7.9384226799999995	45	rps2
39.11465979	8.19480412	45	rps2
39.81738144	6.70563918	45	rps2
37.92691753	7.79739175	45	rps2
30.2775567	7.17998969	45	rps2
39.83772165	6.89097938	45	rps2
43.51024742	7.76741237	45	rps2
40.96319588	7.23094845	45	rps2
38.155051549999996	7.58036082	45	rps2
36.465206189999996	7.900103090000001	45	rps2
42.66429897	8.50702062	45	rps2
31.77175258	7.40383505	45	rps2
32.937597939999996	6075	45	rps2
31.488144330000004	6.5386391800000006	45	rps2
44.413928569999996	7.58163393	45	rps2
38.44882143	8.11938393	45	rps2
43.776875	8.71800893	45	rps2
40.3996875	7.3978125	45	rps2
37.94008036	7.492205359999999	45	rps2
31.4729375	7.17350893	45	rps2
38.14289286	7.665955359999999	45	rps2
37.48475	6.45408036	45	rps2
32.9448125	6.56938393	45	rps2
30.534794639999998	6.5243392899999995	45	rps2
36.36278351	7.0314226799999995	45	rps2
36.430051549999995	7.875762890000001	45	rps2
38.05085567	7.573195879999999	45	rps2
35.847309280000005	7.966762890000001	45	rps2
35.04065979	10.36769072	45	rps2
41.194680410000004	8.5944433	45	rps2
38.83863918	8268	45	rps2
37.14878351	8.139680409999999	45	rps2
43.30051546	8.59345361	45	rps2
34.92935714	9.59524107	45	rps2
37.06704464	7.107732140000001	45	rps2
31.398642860000002	8.46078571	45	rps2
40.17401786	8.81715179	45	rps2
38.0133	7.4545625	45	rps2
37.8900375	8.022287500000001	45	rps2
39.56065	9.0490375	45	rps2
44.3967125	8.2219125	45	rps2
43.77435	7.67415	45	rps2
35.0895125	7.7261375	45	rps2
37.543422680000006	7.577041240000001	45	rps2
33.31987629	8.07845361	45	rps2
41.0282268	7.44464948	45	rps2
44.13826803999999	9.30553608	45	rps2
38.649690719999995	8.39034021	45	rps2
39.71945361	7.8496701	45	rps2
42.57746392	7.24860825	45	rps2
39.16587629	8.47787629	45	rps2
41.12291753	9.774958759999999	45	rps2
45.220536079999995	8.98337113	45	rps2
35.28929897	7.579701029999999	45	rps2
36.75151546	6.83939175	45	rps2
42.042278350000004	7.9707628900000005	45	rps2
40.666824739999996	7.48307216	45	rps2
38.600375	8.526987499999999	45	rps2
34.01535	8.0531375	45	rps2
39.8457625	7.009425	45	rps2
37.745987500000005	7.3217	45	rps2
39.5163375	6.1488875	45	rps2
36.674949999999995	8.670637500000002	45	rps2
38.801775	7.5803125	45	rps2
41.9506875	7.0926	45	rps2
37.60259677	6.04991964	60	rps2
40.0660125	10.5143125	60	rps2
44.10608036	8.20050893	60	rps2
36.68337956	9.26443066	60	rps2
43.17323358	8.00031387	60	rps2
40.2519781	9.828854009999999	60	rps2
41.89772165	8.48735052	60	rps2
40.51372165	6.774670100000001	60	rps2
38.933144330000005	7.93803093	60	rps2
35.35285714	9.1444375	60	rps2
39.94124107	8.34203571	60	rps2
36.02253571000001	8.53304464	60	rps2
39.8908125	7.97136607	60	rps2
35.88405357	7.567848209999999	60	rps2
35.58134821	7.018294640000001	60	rps2
35.4344433	7.526206190000001	60	rps2
39.85472165	9.32364948	60	rps2
40.25747423	9.43447423	60	rps2
40.912422680000006	8.19772165	60	rps2
36.40618557	9.09283505	60	rps2
34.56566423	8.479562040000001	60	rps2
38.85643066000001	9.002021899999999	60	rps2
36.960656930000006	9.93035766	60	rps2
35.39312409	9.02678102	60	rps2
37.253700730000006	8.817445259999998	60	rps2
34.137051549999995	7.07353608	60	rps2
35.05735052	6.15235052	60	rps2
33.58691753	9.749443300000001	60	rps2
33.160865980000004	7.49064948	60	rps2
34.98953608	8.76583505	60	rps2
33.2951	8.2286625	60	rps2
36.265775000000005	8.1237375	60	rps2
33.226175000000005	8.6365625	60	rps2
36.6575875	7.6229125	60	rps2
39.2042625	9.2548875	60	rps2
37.7059375	8.6983	60	rps2
36.39275	6.83961607	60	rps2
40.82950893	7.92824107	60	rps2
36.43041964	8.21625893	60	rps2
38.41997321	9.04460714	60	rps2
44.22505797	9.490014490000002	60	rps2
42.9094433	9.094979379999998	60	rps2
37.60853608	8.81335052	60	rps2
39.34379381	8.92598969	60	rps2
39.09671133999999	9.53984536	60	rps2
42.24346429	7.347107140000001	60	rps2
39.8991875	7.97817857	60	rps2
40.5296375	10.24680357	60	rps2
38.23376786	7.510464290000001	60	rps2
42.32677679	7.04090179	60	rps2
37.77041071000001	8.276375	60	rps2
41.21454464	6.68532143	60	rps2
28.216125	5.19141964	60	rps2
40.4216625	8.603174999999998	60	rps2
42.321887499999995	8.1471625	60	rps2
34.3456125	7.1578125	60	rps2
33.9263875	8.3219125	60	rps2
41.4287125	9.5372625	60	rps2
38.1577125	6.8386875	60	rps2
38.56035	8.854524999999999	60	rps2
39.6382375	7.5993625	60	rps2
35.778425000000006	7.5779250000000005	60	rps2
36.324075	7.546425	60	rps2
37.7795942	9.93014493	60	rps2
38.73457692	8.23153846	60	rps2
36.167175	7.53325	60	rps2
38.578480230000004	11.99846328	120	rps2
38.18803955	9.29424294	120	rps2
37.69118079	10.43502825	120	rps2
32.34164972	8.82912429	120	rps2
36.61837288	14.10123729	120	rps2
33.390152539999995	10.01554802	120	rps2
36.058689269999995	11.18584746	120	rps2
36.66883051	10.41768927	120	rps2
38.82941808	10.72132768	120	rps2
9.91188462	4.13796795	0	rpl2401
9.25797436	3.83551923	0	rpl2401
9.99289744	4.548339739999999	0	rpl2401
8.59026282	3.71020513	0	rpl2401
9.254442309999998	3.9958910299999997	0	rpl2401
10.39458667	3.8332115399999998	0	rpl2401
9.684608890000002	4007	0	rpl2401
10.37502667	4.46470513	0	rpl2401
6.51106186	3.16309278	0	rpl2401
6.01961856	3.15372165	0	rpl2401
6.47609278	3.07553608	0	rpl2401
6.185257729999999	2.87276289	0	rpl2401
6.340701029999999	2.9215257699999997	0	rpl2401
6.9062886599999995	2.87114433	0	rpl2401
6.07812444	3.06849485	0	rpl2401
8.98723358	3.20243796	0	rpl2401
8.925467150000001	3.5936934299999996	0	rpl2401
8.69560584	3.5057153299999997	0	rpl2401
8.32159124	3.4805109499999998	0	rpl2401
8.632494849999999	4.13856701	0	rpl2401
7.98380412	3.5504123700000005	0	rpl2401
7.060793809999999	3.58394845	0	rpl2401
7.50506186	3.46408247	0	rpl2401
9.42684536	3.5600206200000004	0	rpl2401
10.1714433	3.5806391799999995	0	rpl2401
9.23782474	3.7140206200000003	0	rpl2401
9.18597938	3.5493402100000004	0	rpl2401
8.54256204	3.3458905100000003	0	rpl2401
9.23756204	3.6648321200000007	0	rpl2401
8.894124090000002	3.64641606	0	rpl2401
8.85829927	3.49491971	0	rpl2401
9.42271134	3.6724226799999995	0	rpl2401
8.404804120000001	3.57329897	0	rpl2401
9.7288866	3.6125876299999997	0	rpl2401
8.536432990000002	3.8235876299999996	0	rpl2401
9.69623711	3.45618557	0	rpl2401
9.295319590000002	3.17395876	0	rpl2401
10.737556699999999	3.67754639	0	rpl2401
7.89581022	3.51855474	0	rpl2401
7.6965036499999995	3.7407810200000005	0	rpl2401
9.053467150000001	3.65467883	0	rpl2401
7.362912409999999	3.5967956200000004	0	rpl2401
8.410087590000002	3.6168613100000004	0	rpl2401
7.482364959999999	4.02482482	0	rpl2401
7.859419640000001	4.16001786	0	rpl2401
7.825267859999999	3.64103571	0	rpl2401
7.591776790000001	3.97708036	0	rpl2401
8.861875	4.18886607	0	rpl2401
9.22708929	3937	0	rpl2401
6.8621875	4.35120536	0	rpl2401
8.68308036	3.7092678599999998	0	rpl2401
8.57891964	4.11249107	0	rpl2401
7.930625	3.9436160700000005	0	rpl2401
8.2624375	3.94848214	0	rpl2401
8.51632143	3.84203571	0	rpl2401
9.71844643	4.2521160700000005	0	rpl2401
9.142759120000001	3.7127518200000003	0	rpl2401
9.313854009999998	3.5083941600000004	0	rpl2401
8.3940365	3.7025182500000002	0	rpl2401
8.626554740000001	4.04080292	0	rpl2401
8.0769708	3.42866423	0	rpl2401
7.82819708	4.363868610000001	0	rpl2401
7.460919640000001	3.36008036	0	rpl2401
8.43485714	3.4001160700000006	0	rpl2401
7.210017859999999	4.0879375	0	rpl2401
8.17995536	3.28307143	0	rpl2401
8.0743125	3.7880982100000002	0	rpl2401
8.40283036	3.19783929	0	rpl2401
8.85641964	3.4668125	0	rpl2401
8.416035710000001	3.54352679	0	rpl2401
9.64985714	3.53920536	0	rpl2401
7.902026790000001	3.04315179	0	rpl2401
8.05640146	4.45818248	0	rpl2401
8.09157664	4.25067153	0	rpl2401
8.910912409999998	3.3774379600000004	0	rpl2401
8.586656929999998	3.3702189799999998	0	rpl2401
7.81442336	3.6244379600000003	0	rpl2401
7.80448905	3.4909051100000004	0	rpl2401
7.858846720000001	4.03157664	0	rpl2401
9.194319590000001	3.5426907200000004	0	rpl2401
8.172767859999999	3.90635714	0	rpl2401
8.36049107	3.51789286	0	rpl2401
8.39884821	3.1513125	0	rpl2401
7.44167857	4.10954464	0	rpl2401
7.4658125	3.82916071	0	rpl2401
8.1705625	3.66998214	0	rpl2401
8.36200893	3.6086517899999997	0	rpl2401
9.62215179	3.44126786	0	rpl2401
7.2224642900000005	3.51129464	0	rpl2401
8.79575893	3.1211607100000003	0	rpl2401
7.4163125	3.30451786	0	rpl2401
8.16525893	3.6182589299999997	0	rpl2401
7.46649107	3.8844910700000006	0	rpl2401
8.90680357	3.4043214299999995	0	rpl2401
7.913857140000001	3.66103571	0	rpl2401
7.69299107	3.84304464	0	rpl2401
7.94444068	5.0929265500000005	15	rpl2401
9.30550282	5.1960226	15	rpl2401
8.57539098	5.513418079999999	15	rpl2401
7.97430952	5.92028249	15	rpl2401
8.67784181	6.04890395	15	rpl2401
9.367689270000001	5.34443503	15	rpl2401
7.8627344599999995	4.76511864	15	rpl2401
8.036485879999999	6.52427684	15	rpl2401
9.083282490000002	5.18140678	15	rpl2401
8.99576271	5.2493446299999995	15	rpl2401
8.338033900000001	4.47084181	15	rpl2401
7.25152542	5.59376836	15	rpl2401
8.49967797	5.437802260000001	15	rpl2401
7.3989562	4.76535766	15	rpl2401
7.24409489	4.88627007	15	rpl2401
6.7093941599999996	6.13583942	15	rpl2401
6.6213941599999995	4.734824820000001	15	rpl2401
8.19667232	5.498655370000001	15	rpl2401
8.46720673	4.58803846	15	rpl2401
7.613327679999999	5.1979096	15	rpl2401
9.15479096	6.001022600000001	15	rpl2401
9.140892659999999	5.63863842	15	rpl2401
8.40458192	5.34410169	15	rpl2401
8.52506215	5.40123729	15	rpl2401
9.099887009999998	5.03560452	15	rpl2401
8.69787006	5.064203389999999	15	rpl2401
7.954135590000001	4.78821469	15	rpl2401
8.98182486	5.1311186399999995	15	rpl2401
8.55857627	4.73785876	15	rpl2401
7.846158190000001	4.83972881	15	rpl2401
8.4009209	5.50945198	15	rpl2401
9.2909887	4.600502820000001	15	rpl2401
8.20140113	5.109288139999999	15	rpl2401
9.13132692	5.192564099999999	15	rpl2401
8.30177564	5.273160260000001	15	rpl2401
8.61757051	5.10041667	15	rpl2401
8.58298718	5.48110897	15	rpl2401
8.30855128	5.033576920000001	15	rpl2401
8.58983333	4.59480769	15	rpl2401
7.891256409999999	4.755429489999999	15	rpl2401
7.964397440000001	5.15897436	15	rpl2401
8.56146154	5.50410897	15	rpl2401
8.64525	5.05977564	15	rpl2401
9.46538942	4.90021154	15	rpl2401
8.375875	4.791697120000001	15	rpl2401
8.448048080000001	4.963504810000001	15	rpl2401
7.59030769	4.81609135	15	rpl2401
8.263341350000001	4.580052879999999	15	rpl2401
8.16772115	5.3698365400000005	15	rpl2401
8063	5.25431731	15	rpl2401
9.27709615	5.17558173	15	rpl2401
8.69401442	4.915552879999999	15	rpl2401
8.24874038	4873	15	rpl2401
8.648783649999999	4.743788459999999	15	rpl2401
9.315442309999998	5.111307689999999	15	rpl2401
7.88239103	4.573910260000001	15	rpl2401
7.6971602599999995	4.92091667	15	rpl2401
7.49344872	4.53875	15	rpl2401
7.9414359	5.00371154	15	rpl2401
8.11101282	5.654692310000001	15	rpl2401
7.82371795	5.24285256	15	rpl2401
7.770551279999999	5.5110576899999995	15	rpl2401
8.86840385	5.67685256	15	rpl2401
8.63073077	5.659427879999999	15	rpl2401
8.978495190000002	5.206629810000001	15	rpl2401
7.194009620000001	5.6619375	15	rpl2401
8.166052879999999	5.401673079999999	15	rpl2401
8.48884672	5.6062335800000005	15	rpl2401
8.49075912	4.71459854	15	rpl2401
8.950831729999999	5.42104327	15	rpl2401
8.554487499999999	4.78898077	15	rpl2401
8.7989375	5.42574038	15	rpl2401
8.713759620000001	4.91403365	15	rpl2401
9.02644712	5.15662981	15	rpl2401
7.685995190000001	4.660451920000001	15	rpl2401
8.65871154	5.15993269	15	rpl2401
8.28922596	4.79649519	15	rpl2401
8.65455769	4.8610817299999995	15	rpl2401
9.20611058	4.980225959999999	15	rpl2401
8.49464904	5.882735579999999	15	rpl2401
7.86270192	5.290197120000001	15	rpl2401
8.248086540000001	4.966774040000001	15	rpl2401
8.557372879999999	5.89698305	30	rpl2401
9.16754802	6.4390904	30	rpl2401
8.93774576	4.999485879999999	30	rpl2401
8.45637853	6.70062712	30	rpl2401
9.086350280000001	6.18810169	30	rpl2401
7.6866996599999995	5.94684642	30	rpl2401
9.114391109999998	6.52347111	30	rpl2401
9.12914222	7.209062220000001	30	rpl2401
7.84440444	5.6962844399999994	30	rpl2401
9.002857780000001	5.516333329999999	30	rpl2401
8.358217779999999	6.079062220000001	30	rpl2401
8.05166222	5.43225333	30	rpl2401
8.61037333	6.50067111	30	rpl2401
8.12826667	5.73243556	30	rpl2401
9.65668	5.5546888899999995	30	rpl2401
8.99267556	6.27724	30	rpl2401
9689	5.7774711100000005	30	rpl2401
9.368911109999999	6.31608	30	rpl2401
9.29767111	6.62399556	30	rpl2401
8.55802667	6.65600889	30	rpl2401
6.9108711099999995	6.613133329999999	30	rpl2401
8.453625	5.83065625	30	rpl2401
8.01598828	5.69051562	30	rpl2401
7.50489831	5.717949150000001	30	rpl2401
8.2720678	6.139299439999999	30	rpl2401
7.7674971799999994	5.9259039499999995	30	rpl2401
7.91500565	6.4868757100000005	30	rpl2401
7.87038667	5.57447556	30	rpl2401
7.825635559999999	5.018560000000001	30	rpl2401
7.18572889	6.20909333	30	rpl2401
7.078533329999999	5.06291556	30	rpl2401
7.32705333	5.7729377799999995	30	rpl2401
6.4142177799999995	6.4142177799999995	30	rpl2401
8.639907220000001	5.87372889	30	rpl2401
8.18516	5.75347111	30	rpl2401
8.04586667	6.423573329999999	30	rpl2401
8.133604440000001	5.97476	30	rpl2401
8.690733329999999	6.62719111	30	rpl2401
8.79910667	6.2537511100000005	30	rpl2401
8.69116	6.37895111	30	rpl2401
6.41855111	6.41855111	30	rpl2401
7.60232444	6.54013778	30	rpl2401
8.00716	6.72101333	30	rpl2401
6.44940444	6.15656889	30	rpl2401
7.11794667	5.76925333	30	rpl2401
7.80022222	5.759364440000001	30	rpl2401
7.71433778	6.08675111	30	rpl2401
8.00900444	6.14599111	30	rpl2401
8.357990379999999	6.291158650000001	30	rpl2401
8.43	5.911038459999999	30	rpl2401
8.550891029999999	6.61046154	30	rpl2401
8.453538459999999	6.54650641	30	rpl2401
7.47421795	5.11919872	30	rpl2401
8.300948720000001	6.44915385	30	rpl2401
7.424916670000001	6.8069102599999995	30	rpl2401
9.79202564	6.061326920000001	30	rpl2401
8.58792949	6.298333329999999	30	rpl2401
8.61957333	6.41009333	30	rpl2401
8.83256444	6.03494667	30	rpl2401
8.10177333	6.85401333	30	rpl2401
8.180951109999999	5.97764	30	rpl2401
7.6293022200000005	6.17671111	30	rpl2401
7.363355559999999	6.011404440000001	30	rpl2401
8.742949150000001	5.95312444	30	rpl2401
8.83343111	6.1342044399999995	30	rpl2401
7.5988	6.383897779999999	30	rpl2401
8.46454639	5.70568444	30	rpl2401
8.12605155	5.848302220000001	30	rpl2401
7.04924	5.68722667	30	rpl2401
8.62738462	6.434271110000001	30	rpl2401
7.260075559999999	5.29794667	30	rpl2401
8.0090073	5.788586670000001	30	rpl2401
9.292576640000002	6.99665333	30	rpl2401
9.017967950000001	6.70988889	30	rpl2401
8.89126667	6.52787111	30	rpl2401
8.371360000000001	7.24316444	30	rpl2401
8.68	6.44518667	30	rpl2401
8.47801333	5.89328889	30	rpl2401
7.810715559999999	5.9125777799999994	30	rpl2401
8.3157625	6.30394222	30	rpl2401
7.34962667	5.82230667	30	rpl2401
7.82119872	6.361634620000001	45	rpl2401
8.60030288	6.69164423	45	rpl2401
8.49344872	6.292677879999999	45	rpl2401
8.04384135	5.37897115	45	rpl2401
7.635302879999999	6.37589904	45	rpl2401
7.995399040000001	7.22258173	45	rpl2401
8.39347445	6.5173317299999995	45	rpl2401
7.948995190000001	6.282365379999999	45	rpl2401
7.395408890000001	6.26681333	45	rpl2401
6.779439999999999	6.716657779999999	45	rpl2401
8.19032889	6.912671109999999	45	rpl2401
8.23868444	6.65401333	45	rpl2401
8.26302667	7.58030667	45	rpl2401
8.33761778	7.14810667	45	rpl2401
8.2710219	6.88962981	45	rpl2401
8.49627404	7.012413459999999	45	rpl2401
7.93521154	6.23577885	45	rpl2401
8.383067309999998	7.09004808	45	rpl2401
7.63785096	6.3368125	45	rpl2401
8.483870190000001	6.28974519	45	rpl2401
7.56914904	6.2420721200000004	45	rpl2401
7.17654327	5.368533650000001	45	rpl2401
7.05183654	5.39252885	45	rpl2401
6.87913778	6.55286667	45	rpl2401
8.32207556	6.44195556	45	rpl2401
7.970751109999999	6.237760000000001	45	rpl2401
7.27865333	6.53464889	45	rpl2401
6.634617779999999	6.634617779999999	45	rpl2401
8.12150222	6.14368444	45	rpl2401
7.185884440000001	6.288164439999999	45	rpl2401
7.15110667	6.64378222	45	rpl2401
7.04428	5.70300889	45	rpl2401
7.04055367	6.29354237	45	rpl2401
8.04639548	6.176587570000001	45	rpl2401
7.40383616	6.55374576	45	rpl2401
6.627163840000001	6.31119209	45	rpl2401
7.88144068	6.30824859	45	rpl2401
7.23862712	7.1323615799999995	45	rpl2401
6.63409605	6.3471807899999995	45	rpl2401
6.48932768	6.81657062	45	rpl2401
7.00582486	6.582124289999999	45	rpl2401
6.8585528799999995	5.86752404	45	rpl2401
6.948413459999999	6.6718125	45	rpl2401
7.06403846	6.52620673	45	rpl2401
6.98782222	6.333833329999999	45	rpl2401
6.68762799	6.19017406	45	rpl2401
8.06315358	5.30470307	45	rpl2401
7.0780791	6.32367235	45	rpl2401
7.28082051	6.05899219	45	rpl2401
7.48376562	6.6339296899999995	45	rpl2401
7.83012179	5.50451953	45	rpl2401
6.881273440000001	6.639214839999999	45	rpl2401
7.405927879999999	6.1250078100000005	45	rpl2401
6.803276790000001	6.2735625	45	rpl2401
7.35320312	6.34323438	45	rpl2401
7.31926562	6.0755625	45	rpl2401
7.974101559999999	6.3368125	45	rpl2401
8.149148440000001	6.612707029999999	45	rpl2401
7.9822343799999995	6.755574220000001	45	rpl2401
7.6216949199999995	6.754039059999999	45	rpl2401
7.72867578	6.493292970000001	45	rpl2401
7.1663046900000005	7.27542578	45	rpl2401
6.2220625	6.058308589999999	45	rpl2401
6.15523438	5.97353906	45	rpl2401
7.34530078	6.14263281	45	rpl2401
7.08859766	6.69635156	45	rpl2401
7.36037288	6.36553516	45	rpl2401
7.40853125	6.3204335899999995	45	rpl2401
7.60183984	5.75573438	45	rpl2401
7.07915385	6.33385938	45	rpl2401
5.86436058	5.897707029999999	45	rpl2401
7.0106	5.75190667	60	rpl2401
6.67752889	6.1693022200000005	60	rpl2401
7.93331111	7.918293329999999	60	rpl2401
7.11035111	6.80413333	60	rpl2401
6.99285778	6.275115560000001	60	rpl2401
8.01574609	7.770269529999999	60	rpl2401
8.32642188	6.934886720000001	60	rpl2401
7.440816409999999	6.411746089999999	60	rpl2401
7.270054690000001	6.17616406	60	rpl2401
7.723625	7.21104688	60	rpl2401
6.952582029999999	7.3251054700000005	60	rpl2401
7.988210940000001	6.8345898400000005	60	rpl2401
7.975298390000001	8.08551562	60	rpl2401
7.13092188	6.61651172	60	rpl2401
8.71668269	6.65676923	60	rpl2401
6.868677879999999	6.72384615	60	rpl2401
7.40024	6.6503244399999994	60	rpl2401
7.315497779999999	6.22372444	60	rpl2401
7.236795559999999	6.900315559999999	60	rpl2401
7.3427022200000005	5.99225778	60	rpl2401
7.4641511099999995	5.79534667	60	rpl2401
9.1768	6.6296044400000005	60	rpl2401
8.95669778	7.242088890000001	60	rpl2401
7.60015111	6.74273333	60	rpl2401
7.64370222	5.82730667	60	rpl2401
7.82715556	6.83787556	60	rpl2401
7.43818667	6.06964889	60	rpl2401
7.499604440000001	5.49159111	60	rpl2401
8.10170667	6.67060889	60	rpl2401
7.16178222	7.95984	60	rpl2401
7.312644440000001	6.946626670000001	60	rpl2401
8.23819556	7.296435559999999	60	rpl2401
7.28198305	7.018556309999999	60	rpl2401
7.782927879999999	7.13988737	60	rpl2401
7.284406779999999	7.37981911	60	rpl2401
7.94387179	7.01849829	60	rpl2401
7.8009774	7.0166894200000005	60	rpl2401
7.38182486	6.7379727	60	rpl2401
6.7179774	6.82859727	60	rpl2401
7.4991875	7.18952218	60	rpl2401
6.19445051	6.91717747	60	rpl2401
6.7658587599999995	6.274385670000001	60	rpl2401
7.381078499999999	6.34190102	60	rpl2401
6.3754744	5.760430029999999	60	rpl2401
7.66791468	6.70222184	60	rpl2401
6.5804778200000005	6.5313105799999995	60	rpl2401
7.1984334500000005	7.167395900000001	60	rpl2401
7.875938570000001	7.29072014	60	rpl2401
6.813546390000001	6.952982940000001	60	rpl2401
8.09838983	6.94941638	60	rpl2401
7.471756409999999	6.75736177	60	rpl2401
7.43789078	7.686627990000001	60	rpl2401
6.43215017	6.442126279999999	60	rpl2401
6.696283279999999	7.515825940000001	60	rpl2401
7.55362222	6.47780889	60	rpl2401
7.09605333	6.21271111	60	rpl2401
7.10390222	6.948991109999999	60	rpl2401
6.78069333	5.421706670000001	60	rpl2401
7.11919111	6.016586670000001	60	rpl2401
8.251008890000001	6.64920889	60	rpl2401
7.04834222	6.67192444	60	rpl2401
6.81598421	6.18836444	60	rpl2401
6.343035560000001	6.09598667	60	rpl2401
7.109773679999999	6.53376	60	rpl2401
7.15988889	7.8624933299999995	60	rpl2401
7.1119422199999995	6.9247555599999995	60	rpl2401
7.1198444400000005	7.08466222	60	rpl2401
6.935235559999999	6.40998222	60	rpl2401
6.009591110000001	6.009591110000001	60	rpl2401
6.64224	6.308786670000001	60	rpl2401
6.7137288900000005	6.0582844399999995	60	rpl2401
7.51780889	7.504275559999999	60	rpl2401
6.746008890000001	7.07890222	60	rpl2401
6.788684440000001	6.2180711099999995	60	rpl2401
6.814195559999999	5.63671111	60	rpl2401
7.3446888900000005	7.070391109999999	60	rpl2401
6.550453329999999	6.19855556	60	rpl2401
6.3773599999999995	7.178675559999999	60	rpl2401
6.547209039999999	5.48298667	60	rpl2401
7.650946670000001	6.968662220000001	60	rpl2401
6.81312	6.63290222	60	rpl2401
6.808506670000001	7.10316	60	rpl2401
7.7172933299999995	7.450262220000001	60	rpl2401
6.55959111	6.51030667	60	rpl2401
6.43122667	6.22396889	60	rpl2401
6.750272109999999	6.965408890000001	60	rpl2401
6.960065220000001	6.78366222	60	rpl2401
6.830968890000001	6.42483111	60	rpl2401
6.73384127	6.57164	60	rpl2401
20.59312444	4.40663918	0	rpl3001
16.931888890000003	4.1734433	0	rpl3001
19.232333330000003	5.0155360799999995	0	rpl3001
18.48971556	4.84326804	0	rpl3001
18.190657780000002	4.88561856	0	rpl3001
18.871262220000002	4.437690720000001	0	rpl3001
20.79287111	6035	0	rpl3001
19.77739111	5.55879381	0	rpl3001
16.81232051	4.93225641	0	rpl3001
16.26944872	4.60117949	0	rpl3001
16.77692949	4.9401859	0	rpl3001
16.60180128	4.179544870000001	0	rpl3001
17.08762179	4.29753846	0	rpl3001
16.48696154	5.31974359	0	rpl3001
18.2035641	5.17087821	0	rpl3001
17.05146795	4.763615379999999	0	rpl3001
17.77101282	5.44853205	0	rpl3001
19.509678830000002	4.924576640000001	0	rpl3001
17.831919709999998	4.86386131	0	rpl3001
16.08556204	4.12733577	0	rpl3001
16.96848175	4.38044526	0	rpl3001
18.46487591	5.5176788299999995	0	rpl3001
17.98206569	5.30668613	0	rpl3001
17.6180438	5.36281752	0	rpl3001
16.44386861	4.79824088	0	rpl3001
17.33529197	4.49836496	0	rpl3001
17.544591240000003	4.139357660000001	0	rpl3001
18.47646715	6.07928467	0	rpl3001
15.48490179	4928	0	rpl3001
15.73716071	4.96678571	0	rpl3001
18.02682143	4.71863393	0	rpl3001
16.831690719999997	5.04968041	0	rpl3001
15.2576	4.96285	0	rpl3001
14.533847459999999	4.4489943499999995	0	rpl3001
16.074536719999998	4.04079661	0	rpl3001
16.02811864	4.42916384	0	rpl3001
16.180305080000004	5.420728810000001	0	rpl3001
17.364322030000004	4.56029944	0	rpl3001
16.42351412	4.36823164	0	rpl3001
16.1199096	4.71888701	0	rpl3001
17.586395480000004	4.62335593	0	rpl3001
17.495553669999996	4.463661020000001	0	rpl3001
16.83923358	3.8896569299999997	0	rpl3001
15.146970799999998	4.35774453	0	rpl3001
17.186452550000002	5.0580438	0	rpl3001
17.14778832	3.8941678799999995	0	rpl3001
20.947649639999998	5.45534307	0	rpl3001
14.547854009999998	4.65393431	0	rpl3001
18.715583940000002	4.11011679	0	rpl3001
16.263007299999998	3.9050219000000004	0	rpl3001
17.433294869999997	4.06389744	0	rpl3001
15.395230769999998	4.166576920000001	0	rpl3001
17.34981022	4.44163504	0	rpl3001
15.03594161	4.02518248	0	rpl3001
17.872729930000002	4.24374453	0	rpl3001
16.70216788	4.34273723	0	rpl3001
17.579036499999997	4.17777372	0	rpl3001
16.04213139	4.413642339999999	0	rpl3001
16.12773723	3.79313139	0	rpl3001
14.77140876	4.143189779999999	0	rpl3001
18.21129808	7.365102220000001	15	rpl3001
18.0683125	7.560865379999999	15	rpl3001
19.22108929	8.29139744	15	rpl3001
17.90366667	8.446608970000002	15	rpl3001
18.151163840000002	8.950814099999999	15	rpl3001
17.686745759999997	7.64651923	15	rpl3001
17.42270621	7.61628846	15	rpl3001
17.289548019999998	8.64116026	15	rpl3001
17.88741964	7.93816827	15	rpl3001
14.921241069999999	8.03338942	15	rpl3001
16.51375	8.32578846	15	rpl3001
17.66109135	8.71704327	15	rpl3001
17.86421154	8.84222596	15	rpl3001
16.33111679	7.93454808	15	rpl3001
14.536571430000002	7.3144855799999995	15	rpl3001
16.773125	7.95567788	15	rpl3001
16.01212821	9.000108970000001	15	rpl3001
16.58682692	9.26708333	15	rpl3001
17.228128209999998	8.034891029999999	15	rpl3001
17.78180769	9.611108970000002	15	rpl3001
16.48691667	9.62575	15	rpl3001
17.00048718	5.99901923	15	rpl3001
17.24978205	7.009775640000001	15	rpl3001
17.36958974	8.09966026	15	rpl3001
15.82042949	8.94486538	15	rpl3001
13.933980769999998	7.202179490000001	15	rpl3001
17.23857692	9.56674359	15	rpl3001
15.773846149999999	5.649544870000001	15	rpl3001
16.329519230000002	5.73414744	15	rpl3001
15.928230769999999	6.64230128	15	rpl3001
14.986237180000002	5.7362243600000005	15	rpl3001
14.82103205	6.70067308	15	rpl3001
15.93810897	8.57803846	15	rpl3001
16.3575641	7.05978205	15	rpl3001
14.128948719999999	6.97609615	15	rpl3001
18.247446330000002	7.575214690000001	15	rpl3001
18.98774576	6.821214690000001	15	rpl3001
17.35516964	6.177898310000001	15	rpl3001
18.82738983	9.320141240000002	15	rpl3001
19.90928814	7.46890395	15	rpl3001
17.62	8.25084181	15	rpl3001
18.55680226	7.47730508	15	rpl3001
17.29612994	6.931276840000001	15	rpl3001
17.22514689	6.2780791	15	rpl3001
16.35275706	6.52974011	15	rpl3001
16.358141240000002	7.29561582	15	rpl3001
16.80616949	7.2289661	15	rpl3001
15.768440680000001	6.391418079999999	15	rpl3001
16.96459887	6.19161017	15	rpl3001
16.78989831	6.5081581900000005	15	rpl3001
17.39052542	6.76978531	15	rpl3001
17.68474011	6.0019096	15	rpl3001
16.56172321	5.5408035700000005	15	rpl3001
21.356677969999996	14.014378530000002	15	rpl3001
18.53515254	9.501553670000002	15	rpl3001
19.38214124	10.180881359999999	15	rpl3001
15.958870059999999	9.737112990000002	15	rpl3001
16.25780791	6.02512994	15	rpl3001
19.672062150000002	7.90057627	15	rpl3001
19.93811299	8.21087006	15	rpl3001
19.35934463	7.3832090400000006	15	rpl3001
19.418152539999998	7.12399435	15	rpl3001
17.215135590000003	6.6499830499999995	15	rpl3001
16.75417514	6.7402881400000005	15	rpl3001
17.50122599	6.981711859999999	15	rpl3001
16.46984746	6.808237290000001	15	rpl3001
18.63197175	8.21872316	15	rpl3001
17.441186440000003	11.8980113	30	rpl3001
16.686523180000002	8.64357062	30	rpl3001
16.78160265	10.514435030000001	30	rpl3001
14.661940399999999	11.62564972	30	rpl3001
17.1267351	12.280322029999999	30	rpl3001
17.089807949999997	11.87790395	30	rpl3001
16.90125166	10.354785309999999	30	rpl3001
18.9247947	12.57154802	30	rpl3001
16.92460656	9.348519770000001	30	rpl3001
13.89624	9.81403556	30	rpl3001
15.98600444	11.32783111	30	rpl3001
15.85210897	11.09480889	30	rpl3001
15.827494849999999	10.385315559999999	30	rpl3001
15.350959999999999	10.94370667	30	rpl3001
15.71232444	11.23228889	30	rpl3001
16.292313869999997	12.194133330000001	30	rpl3001
18.78825	12.67855556	30	rpl3001
16.557080000000003	12148	30	rpl3001
17.04710256	12.659755559999999	30	rpl3001
16.868411390000002	11.88652532	30	rpl3001
15.761782049999999	12.61996587	30	rpl3001
17.24790385	13.578365190000001	30	rpl3001
17.13308444	9.97432889	30	rpl3001
14.43603111	9.71104889	30	rpl3001
12.72234222	8.62425778	30	rpl3001
15.049813330000001	10.17469333	30	rpl3001
14.50968	8.71533778	30	rpl3001
14.70996889	9.921444440000002	30	rpl3001
14.56194667	9.69304889	30	rpl3001
16.629942309999997	7.6077179500000005	30	rpl3001
14.86367308	10.44572436	30	rpl3001
17.26900641	9.38541667	30	rpl3001
15.935048890000001	9.840124440000002	30	rpl3001
16.55046667	10.32374222	30	rpl3001
15.37908444	10.37957333	30	rpl3001
16.561919999999997	10.714542220000002	30	rpl3001
15.70908	10.66692444	30	rpl3001
14.73164889	9.16696	30	rpl3001
15.76408889	10.58232	30	rpl3001
14.84666667	9.000204440000001	30	rpl3001
16.89935111	11.22532889	30	rpl3001
15.290231109999999	9.25974222	30	rpl3001
15.17797333	9.556022220000001	30	rpl3001
14.868266669999999	9.16074222	30	rpl3001
15.821879999999998	10.186399999999999	30	rpl3001
17.12434222	10.24188889	30	rpl3001
16.80640444	11.431280000000001	30	rpl3001
15.70064889	10.16702667	30	rpl3001
15.71133333	8.895768890000001	30	rpl3001
16.39120889	8.38801778	30	rpl3001
14.732297780000001	9.82856889	30	rpl3001
16.877488890000002	10.436075559999999	30	rpl3001
15.107106669999999	9.14741778	30	rpl3001
15.829057780000001	9.44512444	30	rpl3001
15.71645778	9.65283556	30	rpl3001
16.641542219999998	10.34267111	30	rpl3001
14.496631110000001	9.797284440000002	30	rpl3001
15.80292	10.31665778	30	rpl3001
15.821586669999999	10.057071109999999	30	rpl3001
16.49546667	10.50143556	30	rpl3001
9.40377885	9.40377885	30	rpl3001
15.847846149999999	10.883807690000001	30	rpl3001
15.690206730000002	10.165442309999998	30	rpl3001
15.47371154	9.6186875	30	rpl3001
16.336461540000002	9.510307690000001	30	rpl3001
17.414504809999997	10.520548080000001	30	rpl3001
15.88913942	10.330442309999999	30	rpl3001
14.154822119999999	9.25626923	30	rpl3001
15.63865385	12.54664904	30	rpl3001
14.98788942	9.35922596	30	rpl3001
16.21882212	10.77725962	30	rpl3001
13.933817309999998	8.923379809999998	30	rpl3001
16.40773558	9.670504809999999	30	rpl3001
15.21723558	10.16716346	30	rpl3001
14.60765385	9.182581729999999	30	rpl3001
18.06307692	10.30149519	30	rpl3001
15.6095	9.30633654	30	rpl3001
13.189634620000001	8.45860577	30	rpl3001
13.01532692	9.197975959999999	30	rpl3001
14.716243239999999	9.850846149999999	30	rpl3001
15.23342308	9.6709375	30	rpl3001
16.87625	10.03417788	30	rpl3001
12.860533649999999	9.66891346	30	rpl3001
15.18139844	12.129371090000001	45	rpl3001
13.861435	10.16966016	45	rpl3001
12.85974609	10.92014844	45	rpl3001
14.808511719999998	12.45495703	45	rpl3001
14.715371090000001	13.885679690000002	45	rpl3001
15.520046880000002	10.41832812	45	rpl3001
15.44772115	10.96553846	45	rpl3001
14.449173080000001	11.67848558	45	rpl3001
14.478293269999998	10.84329808	45	rpl3001
15.081831730000001	11.01735096	45	rpl3001
14436	12.85447115	45	rpl3001
14.517557690000002	10.53341346	45	rpl3001
14.599423080000001	8.789307690000001	45	rpl3001
14.366769230000001	10.25189423	45	rpl3001
12.82851172	10.61588672	45	rpl3001
13.2519375	10.21482422	45	rpl3001
13.347945309999998	12.324878909999999	45	rpl3001
11.24475391	9.91669141	45	rpl3001
12.63327344	9.83646094	45	rpl3001
15.68071094	10.90659375	45	rpl3001
13.66489844	10.748914059999999	45	rpl3001
14.86115234	11.38065625	45	rpl3001
10.817432690000002	9.47790385	45	rpl3001
15.590519230000002	13.08488462	45	rpl3001
16.2714375	12.797298080000001	45	rpl3001
11.73895192	10.74852404	45	rpl3001
11.32943269	11035	45	rpl3001
17.102783650000003	13.34752885	45	rpl3001
17.84032692	13.29704327	45	rpl3001
13.35732692	10.860807690000001	45	rpl3001
13425	11.92629327	45	rpl3001
14.482091350000001	13.22714904	45	rpl3001
14.26563942	13.578879809999998	45	rpl3001
12.80035577	10.888485580000001	45	rpl3001
15.27925	12.064048080000001	45	rpl3001
12.96770673	11.85334135	45	rpl3001
14.13917308	12.02414423	45	rpl3001
14.078067309999998	10.89408173	45	rpl3001
11.54170192	11.54170192	45	rpl3001
12.9779375	13.01336538	45	rpl3001
13.057278850000001	11.20096154	45	rpl3001
16.5579375	12.42059615	45	rpl3001
12.79016346	12.79016346	45	rpl3001
16.26501442	11.872471149999999	45	rpl3001
15.418076919999999	12.58863462	45	rpl3001
13.23885577	11.112629809999998	45	rpl3001
12.59170192	11.921990379999999	45	rpl3001
13.8111875	11.15289904	45	rpl3001
14.25169231	12.836274040000001	45	rpl3001
15.489375	12.01033654	45	rpl3001
15.32477404	12.835759620000001	45	rpl3001
15.324120190000002	12.495567309999998	45	rpl3001
16.848870190000003	12.51329327	45	rpl3001
15.095307690000002	11.183807690000002	45	rpl3001
13.65406186	11516	45	rpl3001
14.67119111	13.38284	45	rpl3001
12.974120000000001	11.074440000000001	45	rpl3001
15.80934127	12.88311111	45	rpl3001
13.486602940000001	12.30791556	45	rpl3001
14.44829469	12.337795559999998	45	rpl3001
13.784133330000001	11.72554667	45	rpl3001
12.96395111	12.271120000000002	45	rpl3001
14.07628926	12.02409778	45	rpl3001
12.87017333	12.09958222	45	rpl3001
13.018448890000002	12.099071109999999	45	rpl3001
12.74090865	10.828245190000002	45	rpl3001
12.52262457	11.45496587	45	rpl3001
14.450509619999998	13.4085	45	rpl3001
14.956691180000002	13.5010625	45	rpl3001
13.29659135	11.86478365	45	rpl3001
14.64540625	11.517370190000001	45	rpl3001
13.25298558	12.6881875	45	rpl3001
13.007177879999999	11.452865379999999	45	rpl3001
14.61863942	10.70702404	45	rpl3001
13.74329808	12.11440385	45	rpl3001
13.8535625	10.19040865	45	rpl3001
15.264855769999999	11.70585096	45	rpl3001
15.343052880000002	12.89789423	45	rpl3001
14.284495190000001	10.93126923	45	rpl3001
13.466394230000002	9.41191346	45	rpl3001
11.92801923	10.99803365	45	rpl3001
11.02577885	10.1148125	45	rpl3001
12.03383173	11.99879808	45	rpl3001
13.08565289	10.881307690000002	45	rpl3001
13.870322119999999	10.860091350000001	45	rpl3001
14.37229808	11.620528850000001	45	rpl3001
13.65049038	11.62238462	45	rpl3001
13.686167880000001	13.58261074	60	rpl3001
15.94762774	17.20110949	60	rpl3001
14.88809489	14.794467150000001	60	rpl3001
16.26394891	16.2089635	60	rpl3001
14.97708029	15.41454015	60	rpl3001
15.130562040000001	16.61754015	60	rpl3001
15.446266669999998	19.464430659999998	60	rpl3001
15.439200000000001	21.20134307	60	rpl3001
13.045277369999999	11.65123209	60	rpl3001
10.766089740000002	12.674710600000001	60	rpl3001
14.91197421	13.4783639	60	rpl3001
14.42064164	14.681976109999999	60	rpl3001
14.404675319999999	13.897037540000001	60	rpl3001
14.072426619999998	12.049651879999999	60	rpl3001
12.78965529	11.888747440000001	60	rpl3001
15.609348119999998	15.539440269999998	60	rpl3001
14.97725949	15.06153481	60	rpl3001
12.18115823	14.68781329	60	rpl3001
12.82461392	12.34123101	60	rpl3001
11.47830063	12.32647785	60	rpl3001
12.36086709	14.22749684	60	rpl3001
13.876610169999998	12.838417719999999	60	rpl3001
14.569600959999999	13.589389240000001	60	rpl3001
13.29205696	12.39068354	60	rpl3001
12.10896835	14.7807057	60	rpl3001
14.20972696	13.0110785	60	rpl3001
13.35397611	13.548167240000001	60	rpl3001
13.277757679999999	12.99683618	60	rpl3001
13.118785710000001	13.252901020000001	60	rpl3001
12.19558333	13.63928328	60	rpl3001
14.594307169999999	11.48280205	60	rpl3001
13.71841297	12.408122870000001	60	rpl3001
13.233784980000001	14.002979519999998	60	rpl3001
14.57830034	13.621501709999999	60	rpl3001
15.03629693	13.267354950000001	60	rpl3001
13.95386007	14.032255969999998	60	rpl3001
15.01572696	13.40685324	60	rpl3001
14.76009898	13.784808869999999	60	rpl3001
13.39705119	15.58280205	60	rpl3001
13.41650556	12.48127645	60	rpl3001
13.898375430000002	12.98617065	60	rpl3001
12.82215017	15.97577133	60	rpl3001
12.10563481	12.643501709999999	60	rpl3001
14.352164440000001	14.90369778	60	rpl3001
14.245959999999998	16.312440000000002	60	rpl3001
14.51503556	15.439266669999999	60	rpl3001
13.498426669999999	13.18249778	60	rpl3001
12.90298222	13.34750222	60	rpl3001
13.979057780000002	14.51916444	60	rpl3001
12.81339111	14.40310667	60	rpl3001
13.257173329999999	12.862524440000001	60	rpl3001
13.735017780000002	15.836617780000001	60	rpl3001
14.228911109999999	14.074737780000001	60	rpl3001
14.52272889	14.169977780000002	60	rpl3001
12.32966222	13.06030667	60	rpl3001
14.241702219999999	14.87794222	60	rpl3001
13.99199556	12.28860889	60	rpl3001
13.89103111	17.36117333	60	rpl3001
12.797995559999999	14.65927556	60	rpl3001
13.249786669999999	13.97508444	60	rpl3001
15.10778667	14.782937780000003	60	rpl3001
14.817742219999998	14.198902219999997	60	rpl3001
13.74759556	14.480133330000001	60	rpl3001
14.54782051	15.68467111	60	rpl3001
14.28456204	20.25982692	90	rpl3001
12.96245255	20.555641030000004	90	rpl3001
15.106811480000001	18.185191409999998	90	rpl3001
13.19516788	19.84662821	90	rpl3001
14.11878832	22.94523077	90	rpl3001
16.85676642	19.42675641	90	rpl3001
14.115708030000002	22.58632692	90	rpl3001
14.62021898	20.475256409999997	90	rpl3001
13.53452555	19.711243590000002	90	rpl3001
12.137642340000001	19.53516667	90	rpl3001
14.5519781	19.017301279999998	90	rpl3001
13.926518249999999	21.41948718	90	rpl3001
11.68500444	20.551728890000003	120	rpl3001
11.69227111	22.81401333	120	rpl3001
11.765155559999998	19.38567111	120	rpl3001
15.077244440000001	20.389884440000003	120	rpl3001
14.54863556	20.09861333	120	rpl3001
12.628768890000002	25.59091111	120	rpl3001
15.60121778	17.79811556	120	rpl3001
13.23097778	20.11829333	120	rpl3001
13.78177778	23.74980444	120	rpl3001
14.044253330000002	19.817697780000003	120	rpl3001
13.623432690000001	22.273615380000003	120	rpl3001
14.805677880000001	17.16834615	120	rpl3001
15.22113942	22.615875	120	rpl3001
13.99498558	22.657259619999998	120	rpl3001
13.715230769999998	22.03659135	120	rpl3001
11.99713462	21.920509619999997	120	rpl3001
13.15821635	25.59691346	120	rpl3001
13.32069712	23.75653365	120	rpl3001
