# Supplementary material for: Control of nuclear size by osmotic forces in Schizosaccharomyces pombe
Source: eLife. 2022 Jul 20;11:e76075. doi: 10.7554/eLife.76075 (PMC9410708; doi:10.7554/eLife.76075)
Supplement: Figure 5—source data 3. — Related to Figure 5G. [file elife-76075-fig5-data3.xlsx]

## Sheet: Sheet1
Nuclear GEMs	0 min	15 min	30 min	60 min		Nuclear GEMs	0 min	15 min	30 min	60 min		Cytoplasmic GEMs	0 min	15 min	30 min	60 min		Cytoplasmic GEMs	0 min	15 min	30 min	60 min
LMB	0.658385	0.392869	0.359971	0.359971		Ctrl	0.147343577832080	0.331769891396984	0.250893067940677	0.214800320569630		LMB	0.569012	0.321419	0.933906	0.531389		Ctrl	0.374907	0.717819	0.361135	0.232385
	0.195968	0.339456	0.0454886	0.0454886			0.710689859017456	0.103312647578917	0.196026560505559	0.190208141574514			0.628648	0.641481	0.369169	0.472055			0.357191	0.224545	0.165482	0.135385
	0.0648468	0.571692	0.985316	0.985316			0.288225031508106	0.185517985409857	1.16493795932395	0.193602073631137			0.207636	0.614214	0.441283	0.437163			0.220167	0.471991	0.304404	0.0652649
	0.299922	0.808039	0.42454	0.42454			0.301531848209411	0.0364657612825728	0.238022377836352	0.234356999336149			0.172576	0.159241	0.718096	0.361703			0.143453	0.167007	0.450925	0.694831
	0.422698	0.301376	0.755958	0.755958			0.501354310767607	0.437573786628369	0.380489799243907	0.354098202908869			0.774105	0.575871	0.295171	0.233451			0.107945	0.128138	0.238469	0.257257
	0.318061	0.377659	2.28553	2.28553			0.355436949215626	0.237753237260216	0.235981198950058	0.215270960491786			0.280024	1.5881	0.161521	0.262259			0.269201	0.603305	0.296288	0.0930151
	1.92258	1.04028	0.127295	0.127295			0.592122332308798	0.319517301178636	0.461730004858258	0.135416945080457			0.556839	1.13168	0.322443	0.111717			0.204109	0.128681	0.299267	0.204139
	0.515356	1.92095	0.130084	0.130084			0.938906635533117	0.458479343894219	0.293957665540132	0.206480431402210			0.076304	0.445023	0.344361	1.08557			0.110738	0.23524	0.245405	0.0801684
	0.153707	0.900794	0.775941	0.775941			0.401684258821253	0.206434052380050	0.675333470194023	0.741894605862037			0.471645	0.160926	1.50544	0.0703442			0.361891	0.328471	1.5396	1.30671
	0.785595	0.496009	0.281478	0.281478			0.192286488878826	0.904844228649226	0.185170834864125	0.123272232918291			0.123707	0.707801	0.183749	0.287901			0.374462	0.741555	0.071239	0.423816
	0.144995	0.503229	0.452175	0.452175			0.412329702268608	0.797432208984547	0.227932409939607	0.243623376719973			0.431888	0.459342	0.376453	0.332952			0.324065	0.133843	0.295095	0.238354
	1.91344	0.171078	0.307239	0.307239			0.0840806284712337	0.109531729777726	0.582596449024564	0.407455393246990			0.167253	0.989412	0.509953	0.756579			0.330106	0.292893	0.234363	0.201055
	0.310626	0.354787	0.10996	0.10996			0.338040281311309	1.04610331398792	0.325069721292626	0.235749471386347			0.872251	0.465827	0.403234	0.104632			0.700974	0.508803	0.370118	0.246733
	0.872989	0.394192	0.539528	0.539528			0.796130306928594	0.460834459495885	0.899969223536316	0.754284479851362			0.264888	0.157548	0.125938	0.327945			0.0865837	0.182366	0.376703	0.568401
	0.298945	0.274895	0.225693	0.225693			0.588463340437086	0.389659264198438	0.996270395447423	0.106569573110719			0.431308	0.522965	0.220942	0.115095			0.161172	0.789978	0.344351	0.637732
	0.505169	0.442958	0.293212	0.293212			0.421862962320727	0.502790018714653	0.320539301305857	0.407220631882986			0.398225	0.214761	0.190586	0.58488			0.153257	0.160696	0.358629	0.198159
	0.349902	0.769912	0.319651	0.319651			0.150838547004449	0.768611585306742	0.405097992376055	1.10903635100404			0.351379	0.127802	0.139837	1.01879			0.683582	0.508285	0.287052	0.498526
	0.969091	0.600723	0.195661	0.195661			0.347033945713003	0.124658604747959	0.238103022958150	0.137217046777186			0.0847028	0.453318	0.390249	0.252306			0.556333	0.109437	0.504953	0.176669
	0.269151	0.165444	0.0310237	0.0310237			0.132779260895518	0.363647661718950	0.503116153876165	0.172683197151059			0.32361	0.481406	0.204438	0.691617			0.0962719	0.322367	0.312253	0.27785
	1.43214	0.171355	2.04748	2.04748			0.448377923795551	0.782741944615606	0.431385191201630	0.291408761083103			0.962866	0.213381	1.29629	0.151444			0.146743	0.677807	0.442532	0.525956
	0.105916	0.430535	0.0264417	0.0264417			0.391429681994814	0.336541696175258	1.20631842240371	0.183021640476490			1.60515	0.975928	0.202995	0.171405			0.427995	0.217305	0.0663355	0.0712651
	0.476898	0.644477	0.136443	0.136443			0.176651427943996	0.392502802939210	0.105019600140926	0.120749317392385			0.543336	0.194524	0.617757	0.939697			0.107344	1.20664	0.171207	0.898163
	0.419133	0.386948	0.248978	0.248978			0.403058256735423	0.858721532370106	0.226570974549432	0.395074503182788			0.443253	0.24986	0.187347	0.349719			0.0389795	0.250858	0.137117	0.365432
	0.103728	0.228086	0.0676605	0.0676605			0.0970635442844419	0.132171450171595	0.390884516842791	0.365182171719417			0.155101	0.290119	0.778982	0.649627			0.263557	0.15644	0.544828	0.341377
	0.296208	0.470893	0.839393	0.839393			0.986270516659154	0.360315363102609	0.432145505981969	0.352792762802497			0.460524	0.425487	0.155114	0.369258			0.73793	0.815449	0.121607	0.325147
	0.682284	0.982083	0.146041	0.146041			0.325733875701567	0.103571315532466	0.423489903333629	0.273080907731544			0.155446	0.167961	0.174882	0.229697			0.843761	0.100461	0.556778	0.600451
	0.432814	0.606822	1.73776	1.73776			0.238822987026409	0.272833592462144	0.142998042352515	1.77143546211590			0.843682	0.231457	0.576154	0.0871584			0.688738	0.790125	1.17333	0.286565
	0.567398	0.179129	0.0828995	0.0828995			0.481741387673258	0.549700638256968	0.167706165125060	0.487636871870777			0.0999206	0.103006	0.0869149	0.173111			0.177579	0.755765	0.70487	0.301912
	0.0979567	0.240929	1.68671	1.68671			0.851397252349604	0.398119370923792	0.675608176940134	0.195253126823679			0.598906	0.0740002	0.393084	0.519208			0.273709	0.40489	0.452018	0.364679
	0.243994	0.418278	0.453585	0.453585			0.698513998066871	0.881759247325794	0.403008872958160	0.672010951435394			0.367576	0.0617348	0.285193	0.330353			0.444178	0.406121	0.580238	0.152568
	0.778858	0.312177	0.364414	0.364414			0.379427029045124	0.283559332004521	0.135639843843648	2.35832827100828			2.09509	1.04247	0.186955	0.294154			0.176587	0.418119	0.609885	0.70352
	0.174805	0.188965	0.100066	0.100066			0.265582908270976	0.230531431726596	0.911587751566767	0.347717426934971			0.203069	0.197519	0.0423381	0.571839			0.11803	1.0951	0.756029	0.105728
	0.0742739	0.16995	0.417686	0.417686			0.423057215199678	0.611647631321603	0.556944021929618	0.444901592362745			0.0220133	0.250331	0.652218	0.286852			0.480705	0.700897	0.5939	0.54972
	0.232174	0.284251	0.118768	0.118768			0.0974264857591232	0.0913563914201749	0.619726825375802	0.267998749129582			1.78698	0.914868	0.0921883	1.07972			0.0669346	1.32455	1.19633	0.744936
	0.157116	0.320012	0.692855	0.692855			0.689784003963258	0.307446222385286	0.548402298757938	0.268401173587788			0.244227	0.502257	0.440989	0.218491			0.457516	0.834735	0.127435	0.135826
	0.76048	0.261237	0.517227	0.517227			0.0455626496926037	1.68979384113223	0.466985259557850	0.218777748162679			0.201825	0.332253	0.577903	0.429013			1.00341	0.24358	0.983252	0.396723
	0.0784995	0.105824	0.472863	0.472863			0.165556088870375	0.397055225459444	0.423323840531761	0.388325337498009			1.81509	0.518304	0.41238	0.475214			0.206584	0.233912	0.0958402	0.844534
	0.431442	0.730583	0.869015	0.869015			0.703182603982846	0.466394609500747	0.627633160325557	0.887647997605247			0.337477	0.438666	0.278474	0.311856			0.576894	0.441579	0.0361308	0.100313
	0.485384	0.553112	1.43538	1.43538			0.162435488709193	0.116553961887891	0.289579873768922	1.99246144882977			0.429128	0.971728	0.102977	0.85953			0.680729	0.321163	0.706417	0.283639
	0.093183	0.54249	0.272066	0.272066			0.191060397563775	0.444602625324029	0.645498490785253	0.584888275196064			0.432262	0.656363	0.213061	0.274525			0.536712	0.449674	0.225153	0.173088
	0.136308	0.280204	0.535388	0.535388			0.544822299346088	0.782679276001623	0.250062686887956	0.791450543909437			0.109683	0.197557	0.342007	0.183085			1.19287	0.505078	0.903584	0.943892
	0.583799	0.541838	0.30644	0.30644			0.602641628299313	0.691044660449583	1.28835443167848	0.531341812612615			0.162992	0.371097	0.199015	0.600367			0.185089	0.179499	0.378175	0.544938
	0.268408	0.0947792	0.0822958	0.0822958			0.622322378061784	0.143435179665453	0.335170532343346	0.262977144142260			0.0704391	0.309849	0.10529	0.0445769			0.362181	0.243397	0.154672	0.124222
	0.794001	0.255047	0.230229	0.230229			0.809993495019273	0.829544752923709	0.331958230933688	0.406953607179337			0.142886	0.535043	0.243879	0.159443			0.392997	0.0552736	0.366376	0.187684
	0.29176	0.454072	0.725321	0.725321			0.446438247603397	0.542008729158097	0.831721933702402	0.472364127465410			0.0856655	0.115858	0.272805	2.36301			0.335761	0.127784	0.20499	0.653572
	1.11909	0.134378	0.305919	0.305919			0.506026362727891	0.537993092978487	0.292829287010962	0.287700545907328			0.0956158	0.394254	0.132806	0.791385			0.239548	0.475155	0.0709258	0.198616
	0.528295	0.232244	0.779218	0.779218			0.746875211506376	0.713843550066723	0.192942711539458	0.240537343607489			0.247885	0.0559822	0.49091	0.0869653			0.673054	0.108171	0.221586	0.195492
	0.416342	0.792914	0.159718	0.159718			1.39007332861587	0.902581300079920	1.15754765939700	0.240792119252621			0.193913	0.0869514	0.402703	0.453643			0.319842	0.0954443	0.613588	0.88356
	2.91918	0.37687	0.608111	0.608111			0.222797807008126	0.0667144110646478	0.902372912258046	0.366263881152313			0.196826	0.289714	0.357542	0.180978			0.464743	0.241585	0.0925481	0.139713
	1.05378	0.424188	0.598109	0.598109			0.456278421351133	0.670156251799959	0.513809979878522	0.439547478964533			0.146876	0.274009	1.0728	0.760336			0.416476	0.230147	0.026631	0.25961
	0.550742	0.182544	0.43203	0.43203			0.452586324413904	0.0697636574122746	0.174303032853050	0.289709211242736			0.369604	0.877159	0.780495	0.375446			0.176797	0.400324	0.213299	0.18913
	0.33709	0.137787	0.138764	0.138764			0.753731747867076	0.385591339664453	0.306907268174008	0.535569563509365			0.0392511	0.203673	0.222624	1.00143			0.170142	1.13846	0.0235821	0.557639
	0.715726	0.305372	0.705056	0.705056			0.310366591120479	0.145859671587397	1.08521980947850	0.343159262361967			0.225146	0.521658	0.624112	0.178385			0.255671	0.884974	0.307212	0.295296
	2.33354	0.20938	0.123506	0.123506			0.300779163030188	0.239411011766217	2.75876308413341	0.672757251892174			0.185461	0.307364	0.289547	0.108807			0.162055	0.555645	0.689885	0.205665
	0.413814	0.12949	0.216078	0.216078			0.668765491565531	0.182464875734934	0.133639837810325	0.471020045148059			0.272517	0.369919	0.508595	1.51877			0.583183	0.34149	0.74976	0.756214
	0.337479	0.205936	0.982346	0.982346			0.0774255106140387	0.363281251598926	0.274037513191736	0.149013651447950			0.454159	0.40209	0.24612	1.98072			0.291031	0.0930257	0.185276	0.277225
	0.537335	0.571706	0.354535	0.354535			0.480457391533693	0.604663768142655	1.41359231857849	0.421827199088026			0.0903029	0.378865	0.432702	0.0738422			0.664014	0.0800393	0.354424	0.437462
	1.01353	0.771482	0.971465	0.971465			0.339564335810610	0.314198097997880	0.461614831280193	0.0820267011529318			0.0859185	0.206286	0.118542	0.194385			0.450703	0.431575	0.0765673	0.405437
	0.330329	0.370164	0.275856	0.275856			0.432739673819009	0.310764216017205	0.702630281360132	0.169282434075956			0.130206	0.0568372	0.0691448	0.370764			0.197764	0.0618334	0.218607	0.110768
	0.146732	0.400359	0.909821	0.909821			0.576141205436476	0.322746914836928	2.04561175038621	0.272974155073802			0.0906836	0.0855584	0.31364	0.284714			0.201699	0.626689	0.680689	0.319624
	0.200476	0.3503	0.380464	0.380464			0.193835243712960	0.129962500424128	0.172877322236654	0.883796394762291			0.402656	0.108246	0.264134	0.604163			0.90542	0.36774	0.419035	0.240711
	0.880983	0.304785	0.973359	0.973359			0.557023655741519	0.158295289660107	0.409412670066253	0.118606866394684			0.396376	0.330433	0.549331	1.16065			0.169318	0.244091	0.0221564	0.0424194
	0.972281	0.941373	0.711234	0.711234			0.348692967957590	0.700145640546829	1.40765638139412	0.169488062514444			0.328091	0.194584	0.607456	1.12745			0.377832	1.25416	0.279922	0.572229
	0.339287	0.154073	0.212904	0.212904			1.08197476515253	0.585887035766067	0.406685708497532	0.304181861598013			0.0573832	1.31955	0.614563	0.491992			0.695418	0.213204	0.14639	0.680327
	0.836742	0.299486	0.402566	0.402566			0.331148327158969	0.344492440990828	0.558344461089648	0.309887171362665			0.35152	0.275394	1.62072	0.715947			0.630093	0.679671	0.494168	0.317805
	0.178066	0.239787	0.372774	0.372774			0.378324463968442	0.924727180513210	0.934238795438509	0.340617394564357			0.129414	0.117443	0.463398	1.50111			0.156055	0.319102	0.0926531	0.0877754
	0.688023	0.349215	1.18337	1.18337			0.401581618379581	0.978058739168225	0.565670959514297	0.265770593694373			0.301744	0.442252	0.632841	0.329577			0.154412	0.383449	0.107498	0.368474
	0.383219	0.308283	0.317603	0.317603			0.549202226251654	0.309029192381237	0.374537846346093	0.942220753345509			0.187116	0.83494	0.558624	0.259631			1.3561	0.147469	0.196698	0.188612
	0.420938	0.526857	0.41312	0.41312			0.272068377726244	0.218836945736462	0.338517897581461	0.232075737109768			0.17545	0.221396	0.751607	0.451116			0.110039	0.614885	0.184749	0.292278
	0.548334	0.425925	0.742071	0.742071			1.02927426237097	0.284309358326909	0.960611306476950	0.253098937161466			0.462956	0.36791	0.152238	0.869009			0.59588	0.821319	0.174187	0.665912
	0.437775	0.290256	0.260622	0.260622			0.859759680483184	1.46868757374457	0.775449512436015	0.425035453856840			0.17721	0.894528	0.727998	0.157333			0.480415	0.0990403	1.35588	0.195165
	0.28402	0.79522	0.416098	0.416098			0.276987874333213	0.286766635692675	0.296500815826889	0.841391200510764			0.109706	0.218327	0.200714	0.234425			0.624185	0.416956	0.172992	0.819088
	0.701504	0.386149	0.826968	0.826968			0.541806827152260	0.664270915906628	0.553475804587569	0.248832320311402			0.539464	1.48174	0.546718	0.234998			0.352015	1.12455	1.06996	0.559094
	0.555646	0.576671	0.467437	0.467437			0.778362279974509	0.571396184298304	0.473619300937673	0.295140301791945			0.18063	0.378882	0.39016	0.376513			0.649739	0.151073	0.815128	0.512783
	0.35843	0.825355	0.328078	0.328078			2.45768161475477	0.201144566844580	0.260757791856190	0.338273777941615			0.117844	0.169975	0.261275	0.422322			0.25453	0.0889357	0.0967108	0.293333
	0.90176	0.0718896	1.2623	1.2623			1.07409180600976	0.729518630876047	0.578726395419608	1.91954158844164			0.460654	0.209353	0.56114	0.782769			0.320751	0.213742	0.422646	0.42857
	0.227823	0.175566	0.397975	0.397975			0.324020584476044	0.530498574376487	1.01870734246176	0.236801367506213			0.0909519	0.152706	0.342319	0.163505			0.156638	0.0664226	0.512155	0.0804993
	0.0759185	0.169535	0.0572547	0.0572547			0.118141713818596	0.761090620918979	0.418508089479333	0.402560200586691			0.398491	0.287971	0.46096	0.649832			0.249423	0.608665	0.743849	0.406361
	0.216593	0.416121	0.148904	0.148904			1.11716585700757	1.05122148972212	0.718248995173967	0.288069779098763			0.281632	0.880785	0.722229	0.331714			0.480583	1.24662	0.0839324	0.787629
	0.183945	0.632014	0.37335	0.37335			0.197284341505607	0.694593891168020	0.802289201625841	1.17931206016259			0.0538635	0.122738	0.095414	0.427628			0.241634	0.140301	0.207221	0.282613
	0.274167	0.69497	0.520377	0.520377			0.244778964915096	0.259709308060075	0.533892647320160	2.02116476276859			0.0655353	0.166457	0.33527	0.0454929			0.235772	0.638655	0.337098	0.27648
	0.032144	0.555044	0.277935	0.277935			0.502717176068355	0.143417767294606	0.259029944005015	0.651216998022066			0.695338	0.0516271	0.482235	0.467564			0.0788776	0.162081	0.683729	0.370439
	0.118183	0.0698144	0.208341	0.208341			0.367184514911385	0.0819845545848047	0.880877967522960	0.647021506302541			0.338163	0.315529	0.320851	0.389163			0.378137	0.191268	0.253572	0.121593
	0.418512	1.40391	0.209083	0.209083			0.323185360647879	0.730849805183654	0.261511292625258	1.18186286117626			0.179904	1.35191	1.02723	0.273898			0.32142	0.125694	0.014876	0.475242
	0.344776	0.945131	0.426902	0.426902			0.131962265974752	0.778509862425454	0.489688944574553	1.10897026978242			0.37624	0.139142	1.54952	0.438083			0.242144	0.783703	0.894792	0.645144
	0.165006	0.36632	0.597645	0.597645			1.14410101777811	0.957944204739107	1.12588492665062	0.261752288633516			0.147664	2.0175	0.314615	0.325682			0.368993	0.389829	0.257419	0.481214
	0.0990137	0.350683	0.853221	0.853221			0.517962684886462	0.764228809560613	0.183020291229201	0.350380312478492			0.346703	0.166452	0.169308	0.499505			0.245672	0.199019	1.03162	1.00918
	0.44723	0.576666	1.1673	1.1673			0.552492972922654	0.101068507152957	1.13461854951567	1.14711437214510			0.654417	0.240143	0.316912	0.158937			0.482763	0.397396	0.0910897	0.72638
	0.771744	0.271622	0.408282	0.408282			0.642628588631785	0.158585567834279	0.203459059080511	0.766674582706893			0.358541	0.446238	0.0901695	0.174428			0.616281	0.288071	0.530813	0.41794
	0.18548	0.0729898	0.291176	0.291176			0.179405937654771	0.254928989658920	0.990399726605342	0.572618668512331			0.744405	0.955447	0.732828	0.385204			0.114006	0.301682	0.736336	0.837967
	0.116364	1.14163	0.749595	0.749595			0.904193984233735	0.326547973520900	0.104005593082084	0.842843025861163			0.536792	0.318001	0.194686	0.472164			0.187217	0.0269704	0.743343	0.266605
	0.464537	0.31324	0.861622	0.861622			0.368146141717428	0.465294310182789	0.477128940214157	0.483969072375745			0.307283	0.171644	0.676978	0.35048			0.223547	0.0867808	0.0891209	0.400282
	0.441286	0.676576	0.428715	0.428715			0.797754343671412	0.420918819626331	0.292801201893294	0.389444316030961			0.750058	0.175964	0.608213	0.197553			0.0648579	0.322415	0.493146	0.575328
	0.428189	0.459998	0.264791	0.264791			0.368700393854957	0.179943526805607	0.122432694303300	0.258593095004053			0.230685	0.314949	1.47802	0.846631			0.277889	0.140449	0.902773	0.169854
	0.072324	0.410193	0.276719	0.276719			0.290956686476934	0.288975404183861	0.243882139169078	0.341495366516780			0.384169	0.188386	0.841863	0.401386			0.184656	0.137621	0.732079	0.213508
	0.193629	0.503194	0.285226	0.285226			0.383844131166249	1.35463083549903	0.746590569178975	0.261670878609861			0.180715	0.727048	1.04134	0.184775			0.438921	0.131522	0.24311	0.195607
	0.832069	0.33329	0.150049	0.150049			0.573439724311644	0.762340619745721	0.361243702576466	0.386853875064072			0.303378	0.516928	0.814618	0.420755			0.132483	0.403433	0.258578	0.179429
	0.207156	0.243537	0.411398	0.411398			0.463269991386719	0.355327720528163	0.324820794297968	1.18256826667230			0.238577	0.54098	0.275435	0.114684			0.361173	0.479751	0.4483	0.0950571
	0.286247	0.669024	0.198998	0.198998			1.30948397213502	0.466073964881487	0.470057177914276	0.621524906712428			0.321796	0.411873	0.401838	0.88545			0.174401	0.338685	0.100407	0.284306
	0.410339	0.421051	0.759617	0.759617			1.64547091107731	0.216422843834124	0.572395590579621	0.861753940675944			0.484623	0.402084	1.09275	0.195851			1.54707	0.304958	0.349595	0.5536
	0.416343	0.366991	0.698083	0.698083			1.14863778589003	0.257325560742043	0.0403129775775502	0.496437882490329			0.413751	0.391036	0.164919	0.828923			0.425179	0.253284	0.450959	0.347946
	0.115418	0.242988	0.10835	0.10835			0.339603037891068	0.637372071269216	0.781778137803157	0.487199474501395			0.411058	0.257096	1.30667	0.385562			0.16401	0.398625	0.148234	0.64103
	0.428842	0.291662	0.305633	0.305633			0.503974150311990	1.26759342644145	0.565406654958619	0.287195402970328			0.210642	0.600899	0.447227	1.10864			1.90429	0.736376	0.38818	0.52812
	0.436976	0.448669	0.332134	0.332134			0.446749179671269	0.673769479993944	0.0495702521638970	0.289484201058423			0.308333	0.478331	0.496135	0.137509			0.718808	0.319733	0.0911945	0.194354
	0.510702	0.0552634	0.253031	0.253031			1.01261011540942	0.237869013843253	0.133363454888617	0.334182282683781			0.65744	0.277328	0.720383	0.713191			0.661518	0.155184	0.811492	0.516356
	0.435306	0.322446	0.587952	0.587952			0.575926935210554	0.171011816531008	0.596439918626456	0.0998738075310180			0.265931	0.361306	0.655427	0.285827			0.770772	0.0276935	0.214439	0.258153
	0.671907	0.0936381	0.222877	0.222877			0.515108560098212	0.318829875648100	0.270361751280220	0.436308532699471			0.279876	0.526665	2.10984	0.315061			1.05564	0.1227	0.358447	0.108639
	0.767824	0.271058	0.620155	0.620155			0.435161672386961	0.834008614432644	0.237639562609552	0.344127756840959			0.0469958	0.500031	0.449933	0.976663			1.08471	0.0528384	0.627029	0.341314
	0.841058	0.163018	0.218017	0.218017			1.96517210576265	0.330440414563373	0.398772238311394	1.18436677590543			0.409982	0.448905	0.543493	1.52887			0.1041	0.11449	0.0558097	0.347919
	1.09061	1.38785	0.277922	0.277922			0.453178840636426	0.408616392274855	0.675433322399938	0.546973624465255			0.435325	0.149289	0.4131	0.736318			0.506627	0.343286	0.486301	0.757698
	0.167331	0.0381949	0.303002	0.303002			0.183224868187964	1.42987941481468	0.622583799168163	0.344526723769185			0.0235659	0.177094	0.539398	0.780755			1.04658	0.0958044	1.36539	0.13034
	0.179316	0.481056	0.398389	0.398389			0.630930914008088	0.348838023335219	0.215108481550414	0.0709849711504124			0.421398	0.670092	1.08496	2.81132			0.491363	0.294546	0.176287	0.00773974
	0.416176	0.112968	0.19741	0.19741			0.391553425569477	0.664600325850839	1.07112004326232	0.320082035383853			0.338779	0.224456	0.82749	0.494067			1.05353	0.252514	0.260346	0.311484
	0.784092	0.111457	0.3942	0.3942			0.242139965844497	0.402285281806200	0.685229173472768	0.166114522931649			0.153183	0.175246	0.836134	0.421235			0.931844	0.286939	0.167034	0.315873
	1.18499	0.340595	0.38603	0.38603			0.444147845742568	0.129719654095432	0.450873386358799	0.0270578526499997			0.279698	0.413898	0.697732	0.368577			0.230945	0.12018	0.35407	0.627781
	0.150249	0.189994	0.20056	0.20056			0.911568435812607	1.16686992598774	0.451636507922939	0.112654573006266			0.266542	0.761277	1.99759	1.00302			0.876049	0.662419	0.173168	0.173006
	0.46362	0.279597	0.790374	0.790374			0.662144033791936	0.997683371898565	0.546157618515489	0.321431325757314			0.141045	0.173117	0.808353	0.966696			0.0692882	0.387222	0.394469	0.475594
	0.795638	0.269737	0.361263	0.361263			1.15720219230051	0.187173385231194	0.214214098798224	2.05736023274582			0.47448	0.186413	0.904839	0.524497			0.211785	0.0268856	0.0569196	0.254001
	1.77963	0.269324	1.78009	1.78009			0.908337273103391	0.658375470890720	0.930610930881489	0.412617953921297			0.608414	0.569082	0.919449	0.235873			0.237061	0.158658	0.313683	1.02127
	1.63511	0.156809	0.289764	0.289764			1.02953704878944	0.602946638648398	0.375139223221118	0.255164425866923			0.31483	1.76228	0.857889	0.224857			0.210164	0.604771	0.634897	0.176292
	0.345252	0.136601	0.232831	0.232831			0.491304141577809	0.973058990139586	0.596370954796539	0.414529252368329			0.319201	0.207165	0.961207	0.0690981			0.189758	0.20767	0.0966392	0.146046
	0.292576	0.137107	0.566203	0.566203			0.765419888235145	0.595978343391129	0.176232752077704	0.159791514057392			0.244505	0.271207	0.589698	0.368371			1.37585	0.348967	0.46146	0.809115
	0.284626	0.383143	0.75079	0.75079			0.489303532518043	0.651281710891557	0.446118738769726	0.407399682770550			0.261355	0.211475	0.381943	1.20912			0.4345	0.0346061	0.307947	0.285903
	0.85624	0.178322	0.265438	0.265438			1.15169284249714	0.396735237768863	0.368811488809594	1.05787533941306			0.686429	0.213963	0.239343	0.739066			1.04263	0.308831	0.359177	0.140985
	0.334882	0.225075	0.144354	0.144354			0.0677631303571150	0.931070979386903	0.329583642641682	0.531515445730131			0.243671	0.154224	0.35966	0.495219			0.527459	0.0378529	0.898071	0.0910238
	0.526448	0.513081	2.37018	2.37018			2.73357755728875	0.0965038429724236	0.902036783674098	0.266175444646906			0.447088	0.354733	1.08135	0.135885			0.596335	0.185129	0.255965	0.299711
	0.411134	0.250625	0.185095	0.185095			0.207678854656876	0.509434392853637	0.120869410453277	0.546140895266936			0.32725	0.344077	0.485959	0.465205			0.0926261	0.202266	0.457374	0.250931
	0.205956	0.934817	0.124442	0.124442			0.779307612719961	0.837642121606632	0.842476025864864	0.0736301757820266			0.407943	0.393464	0.128466	0.165268			0.133456	0.149631	0.217403	0.0725736
	0.30226	0.357325	0.355321	0.355321			0.590276491771211	0.0783127416997278	1.29990003443442	0.285335895325928			0.158493	0.418074	0.84282	0.206935			0.200469	0.0411334	0.0654671	0.294337
	0.480121	0.852154	0.949416	0.949416			0.0781791945609791	0.473356891372215	0.383894665392579	0.924245052184509			0.137726	0.322263	0.170355	0.976036			0.223079	0.246985	0.0846883	0.35255
	0.621842	0.290317	0.0736832	0.0736832			0.575919589193941	0.336954651452807	0.622085357332316	0.273640332065671			0.201505	0.301671	0.479651	0.772467			0.153543	0.0908121	0.397195	0.300314
	0.500738	0.914444	0.731748	0.731748			0.268097980562646	0.983633310208471	0.115839312559454	1.28930752438630			0.493728	0.428486	0.309451	0.588806			0.287712	0.179854	0.246695	2.09559
	0.586212	0.419339	0.296921	0.296921			0.266988169122062	0.529847050905527	0.326891662781354	0.133282282229098			0.438885	0.0733079	0.408582	1.33342			1.01852	0.109133	0.432311	0.127898
	0.461377	0.538277	1.69818	1.69818			0.375163250041962	0.231353452168702	1.00779628756465	0.208838494539064			0.368774	0.0954854	0.268346	0.974685			0.866688	0.167273	0.135829	0.285786
	0.557439	0.853895	0.148222	0.148222			0.569603099834286	0.348514799527882	0.315901649075996	0.552457791309502			0.230135	0.194105	0.651906	0.939311			0.33608	0.159892	0.406193	0.543929
	0.667747	0.179449	0.256122	0.256122			0.116192385844159	0.138801879017972	0.278040973556862	0.424777897345240			0.580797	0.274388	0.806576	0.574607			0.655793	0.214741	0.176345	0.0760225
	0.594775	0.933987	0.203601	0.203601			0.208666149552209	1.13193311667309	0.300331397610770	0.786353038850444			0.0708131	0.117625	0.473937	0.618139			0.343614	0.127554	0.108477	0.25866
	0.775271	0.157481	0.0974076	0.0974076			0.469594091300239	0.206255320563470	1.06437165107730	0.334701445941657			0.634628	0.46864	0.3593	0.0484263			0.287302	0.377545	0.563008	0.204841
	0.548945	0.28036	0.252132	0.252132			0.161539541077769	0.0766329027511418	0.135096400575873	1.35857440216340			0.110961	0.132547	1.24724	0.234864			0.389767	0.661408	1.00838	0.132978
	0.199952	0.362256	0.22384	0.22384			0.294646405991591	0.156227668741772	0.574301962639745	0.758290960953949			0.589868	0.323019	0.638346	0.658541			0.697458	0.555196	0.194117	0.34494
	0.328101	0.416239	0.391802	0.391802			0.540652585213176	0.824939272338465	0.107172482447766	0.113993161549675			0.345754	0.0956771	0.152337	0.710635			0.0987529	0.186743	0.474133	0.463236
	0.705636	0.369564	0.905031	0.905031			0.161671402644883	0.455799691742080	1.27917868768463	0.369526410910180			0.168298	0.13415	0.102077	0.716659			0.310345	0.157446	0.0844832	0.200455
	0.270107	0.615216	1.64474	1.64474			1.24599706092434	0.903457519895822	0.197129532992517	0.384490085657011			0.221568	0.349108	0.179961	0.627288			0.264738	0.303828	0.341935	1.04899
	0.455402	0.909973	0.0637011	0.0637011			0.739122373995965	0.187110254814268	0.212689090612347	0.296310728664735			0.212242	0.216947	0.689745	0.235054			0.35197	0.378782	0.462342	0.571748
	0.544373	0.428613	0.225585	0.225585			0.738224675504551	0.591514106147228	0.632360551781394	0.115454724765542			0.326689	0.0802465	0.508465	0.410626			0.328897	0.318606	0.351947	0.496984
	1.3032	0.459632	0.320749	0.320749			0.353201217294271	0.0998165069992442	0.459205486571468	0.834133826560321			0.162817	0.289297	0.277358	0.636133			0.337032	0.249599	0.562492	0.279817
	0.207404	1.09672	0.298217	0.298217			0.0182237654028703	0.349703960743685	0.411984794395115	0.117441323168151			0.125353	0.208572	0.460443	0.144056			0.178509	0.662802	0.0624668	0.136497
	0.165874	0.115193	0.400627	0.400627			0.426919378954724	0.178221213982075	0.468194447256723	0.0867082576234137			0.846396	0.387886	0.313792	0.367592			0.501679	0.529681	0.123108	0.518838
	0.631616	0.221473	0.189352	0.189352			0.796143376959608	0.759760932618033	0.463182606758218	0.984016847061066			0.353336	0.266605	0.0813671	0.270104			0.728472	0.651328	0.245734	0.210577
	0.847995	0.457791	0.224777	0.224777			0.997812107426842	0.188963930995882	0.555590959529475	0.0746276104330707			0.449692	0.109187	0.743291	0.41442			0.740839	0.211818	0.373645	1.9034
	0.629891	0.462947	1.43819	1.43819			0.273172615040854	0.656630176758173	0.268781216847502	0.119163080727176			0.218003	0.0971603	0.962848	0.338699			0.298801	0.0757917	0.230588	0.234382
	0.617662	0.173472	0.371336	0.371336			0.109178652745826	1.09921862501006	0.193022697248687	0.0608785060605438			0.0565752	0.123144	0.490986	0.333469			0.2131	0.00917915	0.331227	0.701614
	0.476328	0.191626	0.652354	0.652354			0.617183642675420	0.274108331747056	0.418945671016489	0.123607918724356			0.27608	0.116861	0.489459	0.193712			0.551466	0.219909	0.282435	0.515709
	0.361202	0.324966	1.73783	1.73783			0.313520462639085	0.643599656951382	0.544385618807009	0.118399692089735			0.147817	0.316292	0.5156	0.74298			0.529428	0.021077	1.21653	0.321557
	0.961608	0.379499	0.471915	0.471915			0.338674629443433	1.19002482655095	2.17008708877589	0.314879812555370			0.0787361	0.136464	0.29164	0.246377			1.01347	0.195282	1.6768	0.340528
	0.355489	0.192612	0.494196	0.494196			0.959700200823395	0.480262681983209	0.413248462162475	0.812722394247177			0.328489	0.131225	0.790522	0.903695			0.270592	0.355546	0.707507	1.35658
	0.648137	2.52105	0.519632	0.519632			0.313801894822856	0.755635391725070	0.408665944929441	0.131604352964299			0.58955	0.212091	0.162218	0.905826			0.251106	0.0275727	0.166785	0.136825
	0.432325	0.25483	0.337555	0.337555			0.233723923131322	0.185530510667873	0.250401906757749	0.0779352354284008			0.35414	0.185395	0.426275	0.680239			0.330827	0.0157045	0.141726	0.74136
	0.226733	0.695774	0.687681	0.687681			0.116402817611931	0.845008968964896	0.427095397876069	0.101247330154585			0.218037	0.0916103	0.603647	0.0870966			0.178246	0.0037126	0.258702	0.503655
	0.950667	0.805851	0.616557	0.616557			0.217878092557833	1.36861481472499	2.88807111547984	0.0509479409619887			0.768188	0.654546	0.435326	0.518759			0.342963	0.162311	0.926445	0.467153
	0.260156	1.26663	0.42795	0.42795			0.297212424158502	3.20897261853583	1.57330791740536	0.697925092825360			0.307693	1.00373	0.58619	0.330301			0.347484	0.0256233	0.451337	0.491306
	0.44681	0.946242	0.710268	0.710268			1.57470658720345	0.687028803512846	0.388476440502126	0.0447886593443229			0.0727609	0.338171	0.464096	0.656977			0.222296	0.0207489	0.34157	0.346851
	0.140702	0.535749	0.8128	0.8128			0.268109343990461	0.873486157992698	0.445135623330125	0.526113875399639			0.329898	1.11254	0.484185	0.529982			0.533718	0.21179	0.741355	0.483768
	0.526938	0.541998	0.376525	0.376525			0.808484677052471	1.05638939341200	0.456353909192453	0.0540645188408924			0.880231	0.51265	0.995456	1.14635			0.0243682	0.0126047	0.155936	0.37133
	0.449497	0.853743	0.838621	0.838621			0.358889573207872	0.331799759464226	0.429703129731768	0.0418410357121302			0.252922	0.150065	0.721077	0.557649			0.388976	0.0170042	0.714484	0.497409
	0.756841	1.04759	0.709213	0.709213			0.258477485382597	0.465821799438330	0.544232861295650	0.161539409911185			0.188221	0.88161	1.52107	0.744599			0.0515048	0.84147	0.261759	0.309249
	0.421801	0.389074	0.486233	0.486233			0.533619565468123	0.206864267708781	0.481382615755222	0.0996824987448893			0.352154	0.231897	0.471031	0.150628			0.278381	0.0266748	0.151544	0.271756
	0.458598	0.605596	0.262586	0.262586			0.422622478148741	0.799102382026853	0.111296746968935	0.149699409928790			0.285595	0.100341	0.705365	0.0527372			0.28699	1.06817	0.715283	0.53445
	0.251887	0.347534	1.32994	1.32994			0.625759056512735	0.164847384793636	0.393661147783133	0.183338865783496			0.123847	0.681309	0.070901	0.419787			0.245175	0.0292091	0.118998	0.561501
	0.385714	0.370547	0.80942	0.80942			0.136657699618450	0.396815294042899	0.384542670153895	0.120546876825701			1.5249	0.166293	0.343798	0.479027			0.299837	0.048231	0.509173	0.847518
	0.416249	0.462188	0.401938	0.401938			0.0367877681238560	0.618228713807248	0.917379602441632	0.0959571903927733			0.173092	0.0671261	0.565591	0.452765			0.208879	0.0112628	0.532874	0.024361
	0.664429	0.487525	0.418674	0.418674			0.572519172472597	0.671830546979125	0.146201910002998	0.138863856208407			0.574625	0.37916	0.18764	0.0669784			0.0336153	0.00495824	0.471855	0.269368
	0.113586	0.527711	0.377058	0.377058			0.564233346628946	2.12836543940424	0.469032618907290	0.102829679903307			0.24142	0.303898	0.547334	0.25425			0.0886566	1.22319	0.130395	0.578446
	0.251625	1.56741	0.854819	0.854819			0.503175772555192	0.329345931513622	0.188146169859517	0.0607578373850013			0.252123	0.153836	0.405209	0.702663			0.142608	0.457455	0.306609	0.276189
	0.231887	0.793607	0.26123	0.26123			0.404593031602427	0.226837780454543	0.158013392703723	0.0787725765291713			0.217351	0.736745	0.207318	0.267656			0.458291	0.0104362	0.292292	0.236726
	1.05109	0.773723	0.347542	0.347542			0.107149038679292	0.835003409724315	0.384312437691265	1.84695505110589			0.619821	0.117884	0.206346	0.378292			0.476274	0.0501885	0.0975583	0.73183
	0.610181	0.116762	1.25545	1.25545			0.346619965109512	0.410393387901820	0.379106422797797	0.775500555062703			0.18348	0.291717	0.332427	0.104701			0.48046	0.0813316	0.348388	0.214903
	0.621135	0.0942232	0.938491	0.938491			0.0495964379744782	0.855612494788477	0.323930154754227	0.757932098743248			0.268708	0.302826	0.383041	0.07741			0.150592	0.0521047	0.0955222	0.217941
	0.251692	1.01146	0.345517	0.345517			0.469106223170758	1.24624569423333	0.277825951873676	0.225314033383523			0.277874	0.186503	0.666273	0.523351			0.319017	1.03244	0.238292	0.578738
	0.859494	0.361998	0.219769	0.219769			0.0889286273000086	0.548129510217379	0.474894792670762	1.74255374344313			0.715951	0.531736	0.363271	0.9536			0.283415	0.0742362	0.225644	0.369281
	0.615959	2.31817	0.189834	0.189834			0.361430190214823	0.366535729044364	0.370368508274980	1.35889345735965			0.529047	0.121123	0.303599	0.231726			1.11219	0.0062753	1.12871	0.197935
	0.408186	0.483068	0.283243	0.283243			0.355002843098860	0.382888159133056	0.742360441756009	0.480315905422087			0.0551092	0.970385	0.534157	0.127382			0.26817	0.0260481	0.468178	1.06471
	1.29057	0.441114	1.44292	1.44292			0.256396995507150	0.318518698968549	0.720720660951008	0.175462466048470			0.209779	0.18369	0.568372	0.544462			0.205628	0.0608282	0.201045	0.131792
	0.740609	0.27452	0.387085	0.387085			0.0518907651625221	0.862213453808878	0.603989188965512	0.466479457275616			1.1592	0.303153	0.439549	0.762403			0.2577	0.384358	0.281293	0.125174
	0.328321	0.424376	0.412467	0.412467			0.772323332167726	0.248603318895029	0.731506939920231	2.02063056777874			0.331989	0.126052	0.398373	0.419816			0.138863	0.00674324	0.248784	0.603308
	0.231572	0.824458	0.213137	0.213137			0.231094102655449	0.605767564207099	0.540906693124911	0.587315849710428			0.445767	1.01989	0.222364	2.38668			0.339383	0.0118966	0.137676	0.0851458
	0.159881	1.11956	0.142767	0.142767			0.656805668562387	0.176071866849394	0.432682712333307	0.588640623603706			0.0726525	0.164977	1.25391	0.0983765			0.831755	0.664759	0.216199	0.447529
	0.248281	0.697624	0.384985	0.384985			0.411493063177212	0.230650264205440	0.274157612941273	0.122603737714800			0.35827	0.704467	0.156355	0.761734			0.301078	0.198217	0.433507	0.285881
	0.240294	1.05512	0.966139	0.966139			0.563207690131153	1.20500249515049	0.528628430246577	1.48573846672506			0.19131	0.642963	0.309164	0.388595			0.514168	0.360453	0.162195	0.172583
	0.937984	0.54441	0.180296	0.180296			0.408389930774832	0.543471936250268	0.129615993464331	0.343358881928791			0.23841	0.076969	1.36538	0.659658			0.682053	0.554748	0.5812	0.491076
	0.767762	0.307661	0.464638	0.464638			0.162741780051854	0.463909534509712	0.326686560048554	0.538939644985140			0.281155	0.462925	1.35746	0.454298			0.509356	0.501206	0.170039	1.97587
	0.0672938	0.197123	0.343686	0.343686			1.04889473060173	0.153919841618930	0.474485493333625	0.211371116605933			0.538912	0.467656	0.584463	0.40321			0.185965	0.0931298	0.655424	0.488723
	0.249351	0.334161	0.144544	0.144544			0.344967065799133	0.869614232023263	0.234556576791503	0.815026707853439			0.587046	0.21691	0.599601	0.184406			0.153225	0.50137	1.32447	0.307657
	0.450181	0.325217	0.84456	0.84456			0.274956473797589	0.770493626380868	0.506660989862775	1.88834343016830			0.218516	0.135106	0.179102	0.154114			0.182459	0.0573322	0.0886511	0.381628
	0.132513	0.425974	0.719722	0.719722			0.363333093458015	0.282134682406457	0.290181140528229	1.30073817501605			0.105068	0.0835132	0.567319	0.25274			0.0746841	0.68336	0.25684	0.0841983
	0.285834	1.00377	0.683099	0.683099			0.767164172077273	0.707090800096942	0.289658545510465	0.345192955637187			0.709961	1.248	0.262459	0.165378			0.402822	0.177519	0.206895	0.196748
	0.0992676	0.156674	0.614471	0.614471			0.743198629673634	0.121509958457197	0.0562158680500497	1.00207333426261			0.120287	0.199817	0.049391	1.10895			0.0767516	0.103019	0.200393	0.423051
	0.942679	0.140555	0.431285	0.431285			0.274268373806070	1.07097875711570	0.467152080434250	1.19713095552954			0.240662	0.238682	0.0971004	0.495518			0.209464	0.281271	0.259387	0.438877
	1.13838	0.148987	0.396238	0.396238			0.171424595146294	2.90647257785739	0.525118403457412	0.235044470585395			0.424516	0.0914943	0.275979	0.541595			0.880794	0.454824	0.137223	0.600789
	0.264548	1.05	0.107003	0.107003			1.71432354758168	1.95049302874828	0.208005330308766	1.44572549151115			0.330196	0.305603	0.361138	0.248254			0.739448	0.139832	0.573697	0.49687
	0.294477	0.521245	1.06228	1.06228			0.749233414757003	0.982525403048791	0.290895612943368	0.952414588175577			0.147414	0.204782	0.436572	0.291991			0.399433	0.128064	0.397535	0.0505658
	0.799006	0.144673	1.47059	1.47059			0.289123553062336	0.446047204224551	0.816352899344993	1.75669523493427			0.351144	0.436534	0.478253	0.590265			0.6061	0.0866273	0.506043	0.186487
	0.556335	0.0545393	0.602266	0.602266			0.223488183886799	0.455284077659039	0.331054948067109	1.22618029576871			0.288633	0.484352	0.169184	0.0401546			0.0538635	0.381926	0.48854	0.259869
	0.25612	0.128393	0.23611	0.23611			0.398638402672809	1.56202601947946	0.359967637258038	0.483015676165426			1.43424	0.167325	0.475154	0.208243			0.440467	0.288913	0.381844	0.169387
	0.335161	0.336621	0.458	0.458			0.822371370963336	0.661306689160882	0.821540774749332	0.357115724434059			0.267993	0.289753	0.410457	0.247055			0.156379	0.498153	0.979464	0.122518
	0.133344	0.0824742	0.339566	0.339566			0.207836432406939	0.470644788737852	0.730179428405485	0.548199674493559			0.472573	1.0622	0.256758	0.415793			0.689211	0.106601	0.401511	0.76718
	0.829004	0.211883	0.288865	0.288865			0.223492739687927	0.303022885780469	0.634212531173028	0.477721858601623			0.150751	0.276007	0.358449	0.472884			0.114439	0.5227	0.116304	0.294933
	0.344567	0.510413	0.559294	0.559294			0.462295222333076	0.628709806716838	0.406534970549555	0.383246832193163			0.23317	0.0811524	0.112984	0.294932			1.26105	0.0631399	0.182879	0.247942
	0.330172	1.41523	0.422405	0.422405			1.30826574648968	0.330800800914692	0.446764647216421	0.436752701373532			0.0282498	0.0706564	0.69717	0.554487			0.171161	0.388022	0.330198	0.261123
	0.357248	0.20561	0.404674	0.404674			1.09575195011054	1.66024811813967	0.389583647719394	1.06779538703187			0.262916	0.0737799	0.349616	0.477064			0.143514	0.0619067	0.103473	0.0723878
	0.0642404	0.357862	0.117014	0.117014			0.414875395140918	0.556213173919261	1.38656444209214	0.722571523160207			0.270996	0.673303	0.957833	0.34924			0.478102	0.184938	0.257062	0.122977
	0.265807	0.362978	0.110415	0.110415			1.08376453842884	0.495394384317545	0.723335394826208	0.311004869004308			0.900874	0.46171	0.165601	0.545929			0.260523	0.308094	0.218645	0.547487
	0.443358	2.28622	0.066819	0.066819			2.83331205502212	0.504771068940886	0.320362737065649	0.359717917051617			0.268352	0.613878	1.12701	0.215014			0.438031	0.511485	0.106422	0.637103
	0.443999	0.328596	0.181879	0.181879			1.14928871814320	0.430672863705241	0.402443948142997	0.289107557965195			0.0455507	0.0489393	0.329981	0.353726			0.173467	0.249746	0.228143	0.181466
	0.694775	0.979138	0.0940921	0.0940921			0.746238771444439	0.224719062320092	0.258520612508514	0.624582981674465			0.424295	0.149554	3.40063	0.526238			0.784293	0.0672801	0.217674	0.308643
	0.326836	0.166443	0.364693	0.364693			0.164869171320526	1.11316531593427	0.435697231389937	0.535266783796524			0.821832	0.229017	0.372257	0.320898			0.00991123	0.0702643	0.305093	0.21908
	0.660337	0.205445	0.0806869	0.0806869			0.817659961401731	0.377307477765165	0.461726396841801	0.621353747514431			0.227464	0.940226	0.582605	0.446487			0.441142	0.466633	0.665797	1.07306
	0.339622	0.067042	0.457345	0.457345			0.104211042496767	0.396203626472863	0.590451244912043	0.849359587906606			0.151436	0.357881	0.357011	0.17868			0.255381	0.122177	0.725839	0.55116
	1.07558	0.618146	0.0761432	0.0761432			0.372476497592187	0.326697537530076	1.91595234496852	0.198556194137070			0.0369066	0.267531	0.239487	0.0983344			0.0709716	0.343863	1.29821	0.646176
	0.0867331	0.441425	0.114091	0.114091			0.547175424714818	0.382030172876351	1.10787236146858	0.0958684160659835			1.05928	0.505436	0.408019	1.08028			0.497201	0.452614	0.364577	0.427566
	0.759422	1.75336	0.354764	0.354764			1.35604953562901	0.482705575056981	0.839396866272656	0.589743911166592			0.627164	0.988635	0.182808	0.400826			0.122754	0.0939158	0.0593691	0.315304
	0.457259	0.0413322	0.11827	0.11827			0.704185339885460	0.452014695417998	0.655867501419090	1.45976840713352			0.457649	0.698934	0.844513	0.2779			0.271519	0.207903	0.616864	0.553199
	0.711773	0.693162	0.161374	0.161374			1.01428899284834	0.710329637745645	0.353311457901365	1.33077469525028			0.607232	0.352458	1.40855	0.198686			0.110323	0.0611726	0.243556	0.386007
	0.297262	0.192274	0.364177	0.364177			0.423093920160921	0.789476027160969	0.588266763656604	0.617297397634327			0.230416	0.276858	0.641739	0.414341			0.0917935	0.172379	0.22247	0.0922811
	0.538208	0.130358	0.541769	0.541769			0.166113666410340	0.457922288494108	1.32821132490267	0.371873611772681			0.325152	0.175275	0.470211	0.449349			0.479104	0.0836629	0.230214	0.29472
	0.336173	0.0838923	1.28822	1.28822			0.749792816863806	0.174861029522272	1.79787129136507	0.478185967338864			0.41394	0.296779	0.432608	1.03904			0.272599	0.193066	0.199001	0.525276
	0.593544	0.44504	1.50237	1.50237			0.743481635537041	0.316173621647850	1.06331222269100	0.635713159138076			0.263914	0.547512	1.80807	0.915123			0.400496	0.40667	0.478992	0.142966
	0.238618	0.306584	0.206198	0.206198			1.91115836381700	1.05964747048439	0.618458047372212	0.634807215126928			0.980896	0.646867	0.214647	0.241409			0.541246	0.0809335	0.352716	0.224842
	0.896227	0.508659	0.547155	0.547155			0.807258015175051	0.606574508839471	0.591286033911102	0.519646269073245			0.417814	0.140567	0.215476	0.369219			0.42219	0.0829342	0.277501	0.698436
	0.18438	0.293737	0.732981	0.732981			0.301471521291023	1.24327968730620	0.151997098871104	0.621841837564872			1.00122	0.543691	0.39497	0.252814			0.202768	1.34667	0.219721	0.180008
	0.256736	0.594533	0.405439	0.405439			0.141761401785403	0.652603383999470	0.330622317485399	0.768703708486934			0.665045	0.350592	0.704715	0.820145			0.464906	0.0861584	0.273626	0.234087
	0.401613	0.402193	0.311825	0.311825			0.798381137173834	0.361972171428353	0.0783842229679246	0.0362213199765749			0.0408258	0.482713	1.22616	0.311983			0.155114	0.0602351	0.170384	0.534948
	0.925207	0.370365	0.517507	0.517507			0.396129233840261	0.537127534408015	0.295445801907398	0.0428032703961476			0.496287	0.238782	0.524879	1.52021			0.540883	0.831793	0.286748	0.168131
	0.315119	0.298281	1.53312	1.53312			0.0719929393416481	0.572664502157221	0.293402088985217	0.200058656012158			0.0152334	0.332292	1.6888	0.850909			0.0514997	0.225139	0.285074	1.16054
	0.606839	1.40125	0.230771	0.230771			0.267111239596729	0.451821343978402	0.337790432265492	0.255867035027323			0.28916	0.627752	1.70023	1.40246			0.782672	0.718442	0.708205	1.06664
	0.453664	0.18757	0.452413	0.452413			0.653111521528495	1.55246804179471	1.04525286004041	0.762006985743965			0.56132	0.406604	0.226972	0.412245			0.47233	0.0608007	0.278057	0.150091
	0.360803	0.946765	0.123278	0.123278			0.772269621854781	1.33348865040693	0.185693228231259	0.710473094258975			0.501188	0.406846	0.201871	0.562726			0.433911	0.019172	0.291142	0.511611
	1.00952	0.253038	0.987267	0.987267			0.500999856683228	0.511910361044779	0.503253978126945	0.358458175444744			0.546171	0.184169	0.484122	0.839451			0.220712	0.242904	0.192888	0.557679
	0.239305	0.143751	1.66993	1.66993			0.489468410917515	0.146489866235765	0.711396070436201	0.456325138484750			0.370248	0.2912	0.275946	0.643784			0.252248	0.0412945	0.33118	0.677873
	0.867596	0.0800561	1.1702	1.1702			1.17765354390634	0.0668995724439982	0.185755453235151	0.423226588823116			0.318897	0.421901	0.173112	0.317639			0.52511	0.305999	0.229651	0.213345
	0.514108	0.68967	1.57702	1.57702			0.475591221632942	0.0925700566246757	2.35395227567346	0.409211903968460			0.202381	0.236224	0.322876	0.366953			1.49877	0.522686	0.235161	0.629355
	0.304551	0.053519	0.505784	0.505784			0.212571337260190	0.612585643724164	0.607962513888722	0.342200421206666			0.513618	0.733567	0.443337	0.577185			0.512941	0.100567	0.387882	0.661537
	0.626187	0.201234	0.206682	0.206682			1.56373013475712	0.254306926208063	0.573718226171278	0.148637406237964			0.13964	0.396454	0.356016	0.272625			0.12268	0.0957293	0.433351	0.242315
	0.742083	0.174989	0.448948	0.448948			2.36350510016279	0.320145549306399	0.335841014354988	0.819608272368706			0.36896	0.380519	0.106273	0.476394			0.10942	0.149133	0.782358	0.122737
	0.553552	0.0703427	0.485704	0.485704			0.536177889251799	0.349621945148649	0.0824584813030682	0.457862831550759			0.0997724	0.136578	1.23785	0.253891			0.429135	0.477405	1.73889	0.748287
	0.332462	0.0637192	0.30914	0.30914			0.636716507797443	0.236569707604181	0.256680548005853	0.375494087584225			0.209615	0.648081	1.44643	0.992244			0.240625	0.177122	0.258724	0.153602
	0.34146	0.924705	0.759221	0.759221			0.636057180185899	0.474796886002967	0.215254143969087	1.56263499983784			1.01476	0.0368762	0.318411	1.22477			0.0960584	0.540193	0.835502	0.307688
	0.124422	0.646559	1.02397	1.02397			0.710601260453144	0.320866843838788	0.867964428919377	0.926161241727129			0.51606	0.529401	0.949791	0.7096			0.151394	0.864177	0.423575	0.204445
	0.313992	1.20626	0.636017	0.636017			1.00175851382387	0.826581620511758	0.139130629318552	1.04093456757379			0.182054	0.351916	0.233207	0.593361			0.23081	0.367189	0.442796	0.0857458
	0.444808	0.288593	0.163727	0.163727			0.689191131592272	1.74797222318245	0.666054676038383	0.889325980061334			0.408881	0.175129	0.623141	0.920189			0.216627	0.649763	0.370448	0.38391
	0.712994	0.172821	0.559047	0.559047			0.614808978349337	0.229140721309495	0.387836350876288	0.674532677616265			1.37165	0.292529	0.411269	0.44039			0.0695942	1.45114	0.200847	0.42335
	0.313106	0.165522	0.194458	0.194458			3.31321175075146	0.448730442859976	0.767132998557771	0.593147904351880			0.649156	0.653397	0.382118	0.553343			0.144336	0.334989	0.130644	1.50235
	0.262821	0.288253	0.451111	0.451111			0.656180443946279	0.342482080884809	0.382178491961179	0.769306734914412			0.536019	0.179532	0.585627	0.60336			0.0767186	0.942312	0.149757	0.134895
	0.623687	0.171616	0.437192	0.437192			0.692114185453144	0.126183478661214	0.319168060989686	0.277882803104940			0.755682	0.373536	0.231314	0.509941			0.615625	0.303429	0.628528	1.14272
	0.918494	0.22496	0.448364	0.448364			0.396866561362105	0.0639833700468831	0.678813708387468	0.294045417562220			0.281487	0.0690553	0.230513	1.13156			0.197526	0.521467	0.247966	0.299372
	2.38685	0.326584	0.29548	0.29548			0.244976091990872	0.409660217589364	0.640460515017413	0.282211250886984			0.179932	0.32601	0.212152	0.520429			0.171863	0.663252	0.491589	0.144111
	0.813566	1.77423	0.679425	0.679425			0.697404946621011	0.0835742858296894	1.19250831111163	0.150446974664936			0.412455	0.131745	0.0857045	0.0377865			0.504663	1.14619	0.110992	0.318711
	0.896475	0.0558222	0.36439	0.36439			0.721598373078343	0.164001115582864	0.292970404171046	0.532655849037029			1.37191	0.121114	0.52608	0.170455			0.096948	0.378617	0.204052	0.157198
	0.48317	0.26846	1.29533	1.29533			1.10293051252527	0.494969781368274	0.240653257705926	0.428825435047405			1.01684	0.286663	0.15297	0.0228444			0.0442881	0.449165	0.783012	0.849522
	0.436123	0.214921	1.11283	1.11283			0.299598851043504	0.138201842387508	0.109035208381477	0.716105430149135			1.21226	0.215626	0.198278	1.43397			0.103448	0.433485	0.754996	0.661405
	0.470495	0.665949	0.553443	0.553443			0.360456727687451	0.162413213010910	0.0650315359787970	0.0625254612512439			0.19253	0.327194	0.12102	0.499366			0.192683	0.323893	0.205699	0.154401
	0.138914	0.382183	1.85516	1.85516			0.388293433883765	0.263163749414047	0.151544985790857	0.927371530204809			0.260599	0.183163	0.57612	0.0773307			0.246443	0.534682	0.391398	0.189098
	0.356832	0.1255	0.391635	0.391635			1.07107676006148	0.434547160175596	0.0666205832667863	0.478210880082461			0.251168	0.353376	0.0227841	0.659532			0.847588	1.33451	0.495924	0.13117
	0.32668	0.616621	0.71177	0.71177			0.362530635293541	0.0965825856006878	0.579897139294527	0.690680094999646			0.431504	0.0355628	0.293128	0.422862			0.0820616	0.225561	0.232032	0.483856
	0.208501	0.394466	0.5025	0.5025			0.364134170337160	0.376841302286415	0.536372957117596	0.557445579729133			0.152954	0.449952	0.0442555	1.02877			0.973028	0.360551	0.962483	0.165974
	0.437259	0.122061	0.388854	0.388854			0.246497431762331	0.885216369066020	0.371290611471262	1.06596862315575			0.0904642	1.50029	0.264056	0.30633			0.149132	0.401422	1.00123	0.17818
	0.252016	0.183872	0.40181	0.40181			1.72961059125030	2.10454346418191	0.702689918860564	0.680779002977581			0.489389	0.234684	0.625279	0.0883014			0.993614	0.282528	0.645754	0.147441
	0.281709	0.629971	0.375929	0.375929			0.482821447181585	0.136679519677200	0.237316838466900	1.08571076499752			0.421409	0.173791	0.279969	0.239393			0.649729	0.330452	0.852281	1.26708
	0.274684	0.207718	2.17688	2.17688			0.359021075702125	0.700498248745772	1.39480385219913	0.587714735924315			0.0729595	0.257623	0.289238	0.348386			0.12302	0.36179	1.25799	0.247138
	0.108412	0.371663	0.495335	0.495335			0.149910020149939	0.247597570774648	0.430600239607582	0.288207695897686			0.257346	0.268177	0.189763	1.04302			0.276148	1.08366	2.26137	0.0948606
	0.259608	0.462939	0.499343	0.499343			0.396440618841486	0.151063531029400	0.114789022685545	0.436700863606368			0.0531937	0.0436811	0.0582515	1.1194			0.814363	0.172629	0.207425	0.250437
	0.25085	0.267589	0.938736	0.938736			0.166674832662130	0.0828321853475334	0.293601239867121	0.520071331999620			0.0627622	0.0812692	0.289105	0.405018			0.65251	0.0712523	0.474571	0.0849073
	0.580901	0.243838	1.25365	1.25365			0.276831555561576	0.219425713647425	0.420626642352190	0.536132913609141			0.494256	0.1796	0.938269	0.467507			0.498544	0.496758	0.14078	0.60566
	1.25643	0.318913	0.662455	0.662455			0.642291968853742	0.112628907422767	0.223928230175984	1.50156717870813			0.544147	0.536253	0.438129	0.66359			0.72773	0.343782	0.771083	0.414193
	0.527209	0.266903	0.860405	0.860405			0.314384608229386	1.07274522555700	0.412360660254206	0.467889441773717			0.235982	0.176485	0.431017	0.742754			0.10748	0.372494	0.440486	0.220594
	0.22439	0.749173	0.459402	0.459402			0.130315739893399	0.479795912351120	0.280455564025112	0.286936651707182			0.365344	0.430852	0.271803	0.854722			0.363124	0.191169	0.733383	0.432708
	0.0921607	0.149711	0.54565	0.54565			0.153903596422839	0.414702175649034	0.833199751287536	0.181800776220783			0.324074	0.210671	0.109622	0.363801			0.233198	0.395221	0.204558	0.244801
	0.192575	0.366072	0.255632	0.255632			0.294504019865020	0.579294844065124	0.608642574959949	0.353425130620561			0.222598	0.291157	0.0480981	0.634838			0.437055	0.374935	0.652831	0.172698
	0.300533	0.0770703	0.154772	0.154772			0.168959846861342	0.173222069266704	0.584541867645694	0.107508849237592			0.167824	0.542517	0.625701	0.444431			0.10796	0.0645116	0.164535	0.226819
	1.25552	0.290309	0.118642	0.118642			0.312705218638217	0.173449959827108	1.40992181641235	0.137468636376335			0.211231	0.0707675	0.410502	1.2952			0.105287	0.610892	0.251333	0.333547
	0.181051	0.13091	0.570093	0.570093			0.318523510425450	0.381905186720142	0.507304875518987	0.899865876674256			0.140679	0.879038	0.213386	0.364779			0.661291	0.23956	0.0958834	0.402563
	0.176187	1.31915	0.680419	0.680419			0.226678960655026	0.189494244456905	0.245805961278238	0.150893460906831			0.342204	0.0589011	0.521964	0.500126			0.404226	0.0511893	0.379666	0.127121
	0.369306	0.486447	0.4036	0.4036			0.725255975006214	0.210584193193178	0.519332433831462	0.453655654186548			0.736914	0.12986	0.732282	0.57092			0.10623	0.190911	0.518596	0.3673
	2.02137	0.151788	0.159074	0.159074			0.181343539612333	0.166193720594106	0.738378040681239	0.303165148597089			0.269825	0.283231	0.349996	0.371159			0.381156	0.780041	0.492344	0.0454602
	0.315402	0.0774419	0.133245	0.133245			0.140460119535198	0.170784017994192	0.564587095163577	0.118585261716056			0.384919	0.159001	0.467008	0.617672			0.564682	0.333878	0.326913	0.0295543
	0.735442	0.264872	0.41238	0.41238			0.182819508367244	0.357303903642557	0.464748443324703	0.0957916379698629			1.30615	0.350114	0.178908	0.729397			0.362733	0.233533	0.407377	0.371928
	0.338289	0.120922	0.248403	0.248403			0.445478005930519	1.26078417878728	0.149241185928321	0.399334727850486			0.239537	0.171841	0.0817504	0.363845			0.195689	0.466497	0.0960939	0.192671
	1.07057	0.467832	0.213867	0.213867			0.107634071915967	0.0850415106953555	0.179184903494644	0.164501481789921			0.524754	0.454473	0.316051	0.360624			1.28374	0.308349	0.337144	0.119184
	0.416462	0.271034	0.101822	0.101822			0.132016527157156	1.13895697160513	0.628482439375548	0.927855798810041			0.239857	0.409788	0.462759	0.33261			0.653601	0.349404	0.366251	0.612684
	0.315538	0.267196	0.579762	0.579762			0.124519777281622	0.444173720548814	0.510006323194882	0.385509817676297			0.24223	0.318282	0.0249932	0.290741			0.453819	0.291677	0.391311	0.0880763
	0.47596	0.233472	0.389372	0.389372			0.462484667367696	0.603715617212348	0.266369636075524	1.19735280722128			0.463193	0.100896	0.103779	0.255846			0.167343	0.174753	0.366453	0.529959
	0.168025	0.320593	0.29905	0.29905			0.124473779831953	0.244712252847998	0.956730255255474	0.621359951456767			0.60556	0.455179	0.473643	0.396321			0.311118	0.392876	0.18826	0.301138
	0.247197	0.233164	0.257812	0.257812			0.0832186832386343	0.507417515622096	0.204517234261705	0.814126313963003			0.434235	0.505291	0.491856	0.225291			0.182849	0.822406	0.273118	0.192266
	0.394234	0.124465	0.659159	0.659159			0.534584056074537	0.805891836620270	0.457141510979917	0.712703974017254			0.116129	0.145787	0.133351	0.256797			0.148167	0.317007	0.705707	0.345273
	0.467141	0.267668	1.40718	1.40718			0.122377328698058	0.217519119244633	0.181013847929715	0.477961517030730			0.504102	1.80402	0.669264	0.68812			0.320661	0.382959	0.201562	0.0913914
	0.0950155	0.177516	0.849404	0.849404			0.203007012177582	0.176717036074747	1.04267430584062	0.743806225698965			0.276705	0.134545	0.403891	0.480689			0.623857	0.989035	0.171172	0.463549
	0.207659	0.209065	0.667284	0.667284			0.275225280076526	0.396835459350370	0.205238186167801	0.873116989743811			0.079237	0.354257	1.66657	1.52408			0.40128	0.434744	0.484125	0.116382
	0.247633	0.117759	0.735174	1.01004			0.240596321240192	0.575658728160174	0.235369217517465	0.228097173087655			0.169302	0.598831	0.109967	0.123057			0.156195	0.113808	0.389964	0.141345
	0.52883	0.0512869	0.334267	0.12867			0.316367870252481	0.485615308832341	0.701916943297510	0.346440852546208			0.247466	0.133687	0.364374	0.297667			0.277289	1.07303	0.194447	0.138521
	1.30091	0.57053	1.19898	0.575924			0.274967716053684	0.266470037649860	0.294429661641713	2.17391714199311			0.211752	0.284189	0.182927	0.562245			0.344587	0.736654	0.136225	0.89092
	0.196227	0.256098	0.270871	0.232008			0.590156279071210	0.293692472693769	0.556813082290750	2.17439070751990			1.49444	0.330879	0.126822	0.746704			0.57507	1.03509	0.198423	0.251342
	0.218087	0.143685	0.748659	0.253289			0.358069835313945	0.575913542493090	0.0620135827770456	0.501208929490401			0.293066	0.842315	1.6515	0.597835			0.861324	0.326166	0.00867452	0.120687
	0.619463	0.186115	0.351997	0.797606			0.0548671062441876	0.0126268481359317	0.0650671344867931	0.887966445944943			0.185517	0.246359	0.498983	0.868204			0.261089	0.40333	0.392428	0.042978
	0.167007	0.286947	0.668602	0.712102			0.429240809569631	0.155162313292400	0.935356271716354	0.776930671272849			0.201114	0.335632	0.196067	0.324078			0.385563	0.200811	0.0878291	0.0244957
	0.400787	0.213784	0.317827	0.29967			0.211744812516639	0.0215023041552314	0.141309251470629	0.165784949589630			0.157544	0.818017	0.453969	0.723965			0.153981	0.434521	0.271571	0.165654
	0.0681064	0.14528	0.748172	0.630819			0.149587536273514	1.04190856680559	0.0574791240823170	0.501218821071402			0.353757	0.329418	1.02894	0.252731			0.828258	0.742727	0.121716	0.206202
	0.187836	0.124368	0.893784	0.320142			0.169594870888439	0.00691827962253413	0.240725053540905	0.296159346259364			0.0358167	0.529229	0.798709	0.511922			0.0293933	0.521107	0.0385762	0.305505
	0.195917	0.337325	0.773204	0.258836			0.0593711865438262	3.18716279192816	0.721200569369426	0.392353039608661			0.23436	0.962819	0.136874	0.408144			0.605906	0.237038	1.04218	0.251459
	0.566453	0.392313	0.169382	0.112127			0.140686334271191	0.0867873771161858	0.0405289245724203	0.478086762380209			0.0955151	0.694166	0.424486	0.317217			0.641296	0.0951313	0.104894	0.153923
	0.542575	0.274028	0.527241	1.16819			0.170122317491885	0.321408032281970	0.163825200159901	0.616513884195222			0.0742684	0.107266	0.163954	1.9089			0.634322	0.202868	0.523018	0.196086
	1.04995	0.222658	0.630216	0.612855			0.109015241599255	0.426573936058872	0.293388081685902	0.742776201612412			1.84969	0.312106	0.710863	0.0944524			0.120569	0.335634	0.0315584	0.615742
	0.282192	0.0909801	0.265953	1.64239			0.364999215799794	0.268942808082658	0.164664345373987	0.787709150502001			0.178501	0.423008	1.19009	1.0892			0.419489	0.288667	0.656221	0.140923
	0.55884	0.606412	0.206476	0.592169			0.253841856082591	0.241900070606594	0.209467145044583	0.388768838516350			0.0529546	1.44261	0.849438	1.70614			0.124076	0.260684	0.071863	0.234252
	0.207502	0.0954135	0.472267	1.04923			0.346079062719564	1.12629340156261	0.187906069099542				0.108951	0.714096	0.305369	0.854888			1.46092	0.92551	0.0752705	0.527841
	0.712291	0.250472	0.475416	0.832843			0.294979035809204	0.00878218477565334	0.505455250212814				0.070964	2.05888	0.147468	0.17025			0.219269	0.0874471	0.1252	0.437905
	0.36416	0.640569	0.380424	1.06562			0.334694871875835	0.123511994749640	0.505238005813955				0.694867	0.941609	0.217693	0.320326			0.417189	1.15734	0.135958	0.264719
	0.413726	0.30436	0.24077	0.102566			0.773063614739247	0.694378348277961	0.198144786205435				0.0511151	0.3087	0.71206	0.565356			1.51004	0.203723	0.492014	0.10894
	0.462264	0.023526	0.254041	1.37302			0.821623869484915	1.14684712477485	0.246919914017931				0.507569	0.215458	1.24184	0.200719			0.0512754	0.788838	0.285844	0.167041
	0.37044	0.450487	0.382315	0.753377			0.403825202392505	0.693701388089078	0.279548741007955				1.37078	0.169242	0.428312	0.326396			0.568106	0.326707	0.246872	0.0653507
	0.200972	0.640106	0.157963	0.513363			0.191543539646733	0.0603979932420008	0.145959789514260				0.0295813	0.369438	0.271323	0.63144			1.29683	0.664607	0.0963266	0.209005
	0.212177	0.812914	0.547618	0.714135			0.285482161142838	0.0695207021414770	0.286009579895024				0.0719642	0.269306	2.03171	0.219675			0.180229	0.450095	0.144141	0.372807
	0.637387	0.922647	0.500644	0.590035			0.238640340897028	0.144472473526993	0.0967546055529051				0.256248	0.145618	0.114349	0.377714			0.160166	0.105681	0.256262	0.429824
	0.370336	0.225741	0.27076	0.175941			0.455817044057981	0.162471672234158	0.0570922005669409				0.0889333	0.317583	0.261214	0.395665			2.23836	0.22792	0.0152221	1.03029
	1.05223	0.168742	0.482745	0.582772			1.68691692450301	0.536762673490314	0.0215668058502848				0.67179	0.17806	0.422237	0.157859			0.304134	0.323638	0.429145	0.731548
	0.972388	0.530586	0.168939	0.311323			0.239036011909168	0.395186779975680	0.165378605691129				0.130742	0.0772574	0.34336	1.0515			0.349795	0.205956	0.22847	0.134541
	0.425498	0.396139	0.959754	0.533709			0.141136453297682	0.290568289960283	0.0297168937496178				0.449381	0.214759	0.192084	0.716016			0.715185	0.0752402	0.363522	0.0564998
	0.179714	0.770585	1.00472	1.22789			1.07273023590109	0.204660171379162	0.186711921272535				0.807948	0.2089	0.635483	0.304807			0.276471	0.347097	1.01008	0.100741
	0.221039	0.566671	0.152521	0.806481			0.109508392286819	0.151600669798683	0.0363716587647091				0.526367	0.281807	1.83186	0.326793			0.243984	0.0483779	0.156481	1.20385
	0.284753	0.268204	2.30413	0.165292			0.280773546908087	0.465677587801262	0.830953121752830				0.309928	0.167665	1.45434	1.56157			0.363909	1.18033	0.952679	0.235984
	0.233688	0.379033	0.813149	0.282885			0.316372519620576	0.820351453915133	0.0853727167917392				0.185004	0.441474	0.305312	0.533598			0.332361	0.149371	0.0798358	0.453901
	0.434817	0.348688	0.304327	0.099017			0.201881747075586	0.222892030043368	0.135293236086496				0.204568	0.281967	0.514057	0.807306			1.51762	1.43704	0.212245	0.286504
	0.144748	0.457078	0.538536	0.196205			0.401552769674180	0.0854511271872413	0.0999371090519932				0.116102	0.462018	0.221685	0.259529			0.963094	0.354022	0.132068	0.431109
	0.102037	0.538147	0.447763	0.728386			0.168482122331536	0.486483863525938	0.0993540971615970				0.120415	0.473042	0.147037	0.229626			0.257783	0.159002	0.128699	0.329226
	0.321923	1.23571	0.291689	0.472351			0.154570539517611	0.305229468954049	0.429052049438296				1.93391	0.732475	1.13052	0.344098			0.33344	0.123102	0.214228	0.131436
	1.3685	1.02562	0.592438	0.134702			0.182404392299050	0.328026993850221	0.602843505918293				0.138529	0.106869	0.157418	0.805841			1.09447	0.506418	0.507674	0.272436
	1.69228	1.53882	0.340531	0.813421			0.247573135316283	0.181391149919409	0.827728545754141				0.0514601	0.520362	0.580401	0.105111			0.144784	0.385896	0.0966232	0.154725
	0.142668	0.86265	0.222732	0.178699			0.224448043622296	0.169371584794699	0.249678460923149				0.192283	0.874778	0.23014	0.206675			0.100366	0.185221	0.341963	0.204459
	0.161542	0.149692	0.401733	0.176157			0.199159662815701	0.208687126685065	1.17392820575302				0.394758	0.602703	0.672507	1.84097			0.255931	0.207594	0.243672	1.50323
	0.871965	0.56752	0.465538	1.04487			0.707543795667938	0.790573434850708	0.665358589870674				0.83638	0.249377	0.743389	0.080224			0.725021	0.590936	0.44736	0.116189
	0.098765	0.123648	0.992239	0.507243			0.342281416554220	0.635623823287859	1.69661449828813				0.106482	0.194323	0.299014	0.21441			0.72741	0.427493	0.106801	0.904104
	0.527859	0.321304	0.990115	0.310009			0.345664395122730	0.414430742927833	1.68244993088034				0.14928	0.0835707	0.638483	0.409438			0.377114	0.548165	0.182115	0.167742
	0.121784	1.36962	0.61765	1.0228			0.219096104948134	0.199479229119594	0.638584460774958				0.0941554	0.191975	0.461128	0.0750455			0.568761	0.51102	0.324734	0.0944922
	0.493893	0.27573	0.250406	0.398048			1.06241407998905	0.493573556866425	1.15660231372047				0.0787079	0.177583	0.637041	0.11245			0.571341	1.0425	0.489808	0.152137
	0.336282	0.373023	0.884834	1.04724			1.06445372301454	0.391171469522841	0.742459418490173				0.274395	1.5809	0.435419	0.106145			0.195343	0.201799	0.244115	0.630369
	1.28384	1.04524	0.131808	0.334265			0.211214955805459	0.217323851077301	0.648601343208687				0.119835	0.408329	0.426874	0.418409			0.234908	1.29301	0.325574	0.383525
	0.105939	0.321521	0.819409	0.416959			0.218516753194167	0.310823177948292	0.0910503504389002				0.0658868	0.191199	0.0613977	0.365581			0.543754	0.284119	0.310508	0.330373
	0.555628	0.375439	0.158609	1.1804			0.581567364341668	0.338115844593940	0.422304891491514				0.346568	0.506731	0.784802	1.12299			0.866337	0.386865	0.220584	0.146339
	0.189536	0.233249	0.274844	0.81858			1.84965423669499	0.563130005955775	0.493510421326686				0.398041	0.266597	0.11949	1.17422			0.258081	0.881352	0.199715	0.501809
	0.298965	0.274975	0.992473	0.515293			0.325696031573558	0.352873334146845	0.608823550522496				0.367069	0.829058	1.31136	0.170083			0.350496	0.0539486	0.186217	0.0437606
	0.39715	0.502268	0.541594	0.55595			0.507191615788896	0.528852843254276	0.770879218607039				0.182451	0.629011	0.821151	0.20888			0.261621	0.388066	0.322809	0.188229
	0.56605	0.997105	0.689113	0.422846			0.286707713076376	0.355912336836369	0.680595219471457				0.0595958	0.369233	0.0959008	0.295106			0.159406	1.08469	0.243619	0.293485
	2.10095	0.786793	0.28281	1.30622			0.377615086844458	0.128115331872552	0.252742799877130				0.188488	0.307419	0.225311	1.36039			0.161885	0.42926	0.186449	0.249825
	0.388824	0.505398	1.02491	0.119367			0.412791013287047	0.654333753235387	1.21354948011175				0.205355	1.00487	0.0265037	1.1162			0.152745	0.279087	0.690352	0.289862
	0.315278	0.150015	0.567349	0.445227			0.383888607144804	0.327703778905014	0.816331090387459				0.19016	0.772995	0.139445	0.279122			0.149659	0.344137	0.0972866	0.117077
	0.351993	0.2505	0.73735	0.35715			0.105808465290230	0.620632089461662	0.464124297067113				0.159333	0.303955	0.239654	0.442046			0.0864859	0.239417	1.21961	0.311622
	0.642049	0.121316	0.450247	0.676251			0.468705840039918	0.561704825926421	0.484256709244420				0.0936504	0.280039	0.108519	1.18182			0.191603	0.17084	0.255032	0.165935
	1.11004	0.172905	0.0517314	0.283669			0.147625326322465	0.249763874811859	0.527624601869857				0.161129	0.262004	0.135259	0.608795			0.196388	0.443364	0.276282	0.189101
	0.438286	0.475716	0.0823693	0.449902			0.761084149137430	0.379363303705345	0.399727471411134				0.481013	0.487621	0.181298	0.918578			0.274002	0.561482	0.0824698	0.48356
	0.746677	0.307619	0.819421	0.198434			0.636320916659737	0.841035738060750	0.371539124258708				0.33027	0.819001	0.149601	0.222373			0.137272	0.269366	0.177397	0.224263
	0.268934	0.170206	0.52778	0.554318			0.296133984864421	0.328750731469779	0.852542168684277				0.398132	0.0589224	0.0746344	0.725921			0.255882	0.132067	0.348933	0.281419
	0.560039	0.314396	1.29697	0.812			0.355771688736628	0.421136983004434	0.767184271190980				0.189717	0.231693	0.103405	0.677962			0.117307	0.135199	0.624147	0.410102
	0.878733	0.142455	0.828456	0.871569			0.508328548262275	1.51415820433158	0.330836649722560				0.0598947	0.182385	0.136006	0.377372			0.0217662	0.184393	0.448373	0.874196
	0.186612	0.0770397	0.646887	0.254221			0.212559732516540	1.63466543650690	0.842979334517855				0.272044	0.287145	1.68344	0.316783			0.519476	0.316951	0.0653447	0.273739
	0.542031	0.166008	0.747946	0.136406			0.439716623507978	0.774683333225414					0.235614	0.108636	0.217804	0.964649			0.648336	0.68289	0.161362	0.0999526
	0.112653	0.113763	0.35989	0.35538			0.588697198268700	0.471214880133694					0.230699	0.170711	1.18691	0.527439			0.0872613	1.66893	0.132528	0.125484
	0.1366	0.735915	0.114139	0.447335			0.973737159835950	0.814024834634603					0.146281	0.939182	0.825662	0.670671			0.462829	0.23662	0.0921318	0.137686
	0.0469658	0.263049	0.717906	0.440009			0.478437432498108	0.334659546681200					0.316884	0.219692	0.0472171	0.667216			0.0781238	0.0394572	0.271041	0.0354725
	0.0721976	0.425828	0.24157	0.587217			0.390224379520475	0.339225025843625					0.248148	0.076777	0.344696	0.374066			0.42824	0.0765502	0.452504	0.331464
	0.0387431	0.446138	0.393406	0.420026			0.0852418926628978	0.171932138795681					0.110932	0.334642	0.113895	0.461638			0.342889	0.0803607	0.759915	0.161999
	0.997459	0.42663	0.0923537	0.362419			0.0676477063522606	0.460822439953005					0.107833	0.633023	0.864194	0.582767			0.148301	0.0881723	0.250541	0.230061
	0.965558	0.486759	0.242352	0.307521			0.333978544944450	0.0779959824980615					0.54109	0.0967209	0.177621	0.492357			0.589402	0.0831673	0.284267	0.0344288
	0.446377	0.399121	0.500485	0.34974			0.215991630949533	0.359520244486447					0.0814805	0.0399537	0.343392	2.49278			0.135913	0.799025	0.319014	0.0457523
	0.805285	0.535525	1.38953	0.65834			0.189765864965972	0.417454729207268					0.493616	0.0542515	0.775389	0.397137			0.166977	0.28286	0.235972	0.202697
	0.268985	0.353594	1.41599	0.935286			0.419998397717645	0.220391894750549					0.0996505	0.0522962	0.671714	0.0959543			0.443173	0.28565	0.199859	0.0623246
	0.787676	0.607605	0.212061	0.802787			0.539920147755328	0.790895908826591					0.165122	0.145997	0.789791	0.9252			0.61259	0.472752	0.155849	0.0906194
	0.464677	0.511609	0.484411	0.457841			0.224631824972352	0.377174096567641					1.08615	0.0124878	0.655382	0.647667			0.152144	1.55871	0.174555	0.567502
	0.943889	0.624193	0.573993	0.580836			0.0853603464758785	0.725435804812020					0.333655	0.131131	0.502602	0.990292			0.458645	0.35704	0.285271	0.86625
	0.611232	0.473943	0.457942	0.842338			0.279569852366558	0.546392033548988					0.24432	0.0372935	0.130598	0.732203			0.212953	1.56123	0.331984	0.198037
	0.903872	0.593653	0.063694	0.750559			0.319223898533634	0.236653633147544					0.234976	0.286218	0.632623	0.333875			0.232492	0.0252547	0.259172	0.623147
	0.993086	1.97595	0.796118	0.872448			5.39860089578820e-06	0.843291586036453					0.226811	0.0349051	1.07131	0.167659			0.204859	0.461539	0.649671	0.46326
	0.561212	0.220505	0.679053	0.730151			0.378461051985818	0.435741532529821					0.193222	0.248082	0.258621	1.3496			0.265368	0.0981664	0.448646	0.0335357
	1.41493	0.851208	0.989937	0.225065			0.586020322007810	0.600322883545202					0.0917614	0.294847	0.551295	0.471			0.181352	0.366667	1.00818	0.211178
	5.10872	0.364413	1.23317	0.255171			0.817559440556511	0.384683123446960					0.668135	0.224061	0.565052	0.706063			0.378705	0.156667	0.353057	0.0930912
	0.192104	0.439446	0.709694	0.895013			0.101141076131355	0.182242834621634					0.585782	0.0653724	0.792935	0.561734			0.738511	0.0549164	0.185348	0.191086
	0.703565	0.844833	0.197015	0.271622			0.652008146539498	0.412956743112361					0.180732	0.0917331	0.525639	0.7399			0.109807	0.477907	0.393666	0.676124
	0.326131	0.0857287	0.251047	0.208944			2.35408146807154	1.15297871456594					0.213666	0.111098	0.577808	0.233891			0.498194	0.346341	0.101927	0.028121
	0.554455	0.0659452	0.280104	0.166595			0.532571190107824	0.462009903257869					0.11863	0.179737	0.46437	0.377754			0.0941942	1.12349	0.854411	0.366676
	0.266107	0.509425	0.423274	0.357229			1.24991792277506	0.484733035267088					0.348675	0.0868658	0.847263	0.405629			0.377579	0.502125	1.38528	1.11301
	0.0864259	0.227311	0.621273	0.369711			0.333742531681344	0.193291022772514					0.0921863	0.117664	0.486551	2.65695			0.130916	0.349149	0.881368	0.533077
	0.649402	0.164893	1.90624	0.693418			0.538714696323837	0.454963687663385					0.342553	0.17646	0.340338	0.178155			0.636863	0.375253	0.307529	0.476196
	0.952007	0.613339	0.107836	0.926384			1.02608031255871	0.255656280364580					0.0670373	0.109546	0.578198	0.283406			0.761172	0.214882	0.240084	0.0363297
	1.37906	0.666644	0.311495	0.274079			0.492440949015490	1.37477046752586					0.0308615	0.0200662	0.467882	1.31095			0.306894	2.24549	0.186466	0.293098
	1.64132	0.54827	0.110308	0.288938			0.353038864563291	0.715026303092791					0.0526452	0.0765673	0.792144	0.105941			0.895867	0.100857	0.442888	0.166198
	0.970765	0.91272	0.317173	0.196446			1.25960859123882						1.069	0.392784	0.485886	0.313966			0.232436	0.189501	0.25883	0.439442
	1.59091	0.459422	0.463684	1.04592			0.377435905958253						0.475123	0.0136357	0.641311	0.649558			1.28163	0.295503	0.267975	0.907328
	0.535439	0.0855729	0.191969	0.581543			0.453244566558034						0.294	0.146601	1.15331	0.173224			0.389091	0.142799	0.229761	0.252917
	0.726174	0.284959	0.143641	1.87239			0.431285744707957						0.3168	0.333601	0.816622	0.180624			0.895574	0.369739	0.511558	0.160821
	0.477282	0.151911	0.715512	0.405612			0.384829067822307						0.284696	0.213412	0.996354	0.521109			0.445442	1.34183	0.456067	0.310657
	0.234711	0.194411	0.219143	0.217795			0.209517155046830						0.196892	0.260472	0.797999	0.449436			0.463515	0.559441	0.136563	0.340801
	0.583212	0.309032	0.289199	0.361059			0.0601864984336732						0.45001	0.398946	0.387808	1.09255			0.255107	0.278629	0.0843159	0.146989
	0.276987	0.269788	0.718935	0.962431			0.323232304403008						0.200294	0.130791	1.50818	0.28901			0.10165	0.168264	0.742586	0.134101
	0.821998	0.161134	0.491492	0.412901			0.140039018914348						0.273923	0.0887449	0.367129	0.277224			2.35982	0.220896	0.706359	0.230479
	0.277664	0.302155	0.318038	0.510456			0.138396528675066						0.279439	0.31567	0.914067	0.030283			0.600546	0.4637	0.235118	0.270948
	0.500203	1.17127	1.0486	0.506913			0.372762820086950						0.299984	0.1114	0.751173	0.612654			0.53341	0.182733	1.30954	0.277147
	0.643762	0.61383	0.551345	1.04347			0.419337467254508						0.0935993	0.366201	0.397236	0.296401			0.0643459	0.461262	0.921042	0.303843
	0.721041	1.05409	0.188364	0.439902			0.0965597772289766						0.868659	0.111307	3.29105	0.0152112			0.0268227	0.789513	0.732529	0.1632
	0.331674	0.535038	0.179961	0.886556			0.629075595422759						0.211451	0.243866	0.482468	0.144349			0.811343	0.39574	0.319089	0.186895
	0.418862	0.507432	0.630258	2.9768			0.151888507389163						0.527263	0.169709	0.421304	0.0325307			0.188447	0.128497	0.361446	0.554148
	0.164519	1.99065	1.27713	0.661255			0.179028084007326						0.137507	0.0299076	0.335608	0.315194			0.696413	0.135602	0.502877	0.132545
	0.121848	0.132618	0.430675	1.0991			0.302167462152157						0.502871	0.270684	0.331112	0.0303395			0.119168	1.03076	0.313673	1.43886
	0.275312	0.518732	0.647694	0.0635215			0.347529462897675						0.160742	0.486576	0.293314	0.831306			0.203417	0.522708	0.316622	0.256125
	0.554667	0.752255	1.78478	0.903756			0.429052198483521						1.62968	0.192797	0.511984	0.0212989			0.147846	0.224907	0.160745	0.188466
	0.482937	0.434642	0.677727	0.366647			0.244573335564037						0.306931	0.017403	1.24905	0.324972			0.195539	0.157551	0.138467	0.521034
	2.74891	0.169709	0.714116	0.390338			0.570627353948168						0.399641	0.647876	0.883116	0.165548			0.378915	0.0943985	0.633886	0.552716
	0.484984	0.362364	1.00874	1.09318			0.105828425809703						0.47805	0.443033	0.233891	0.0712535			0.370402	0.344365	0.367029	0.159062
	0.164878	1.39002	0.207914	0.128115			0.196211728079516						0.898986	0.574494	1.45846	0.028754			0.213097	0.0803828	0.368057	0.241381
	0.438365	0.648462	0.222769	0.268363			0.168890600504085						0.990932	0.515055	0.292088	0.948445			0.0608721	0.28839	0.63828	0.0221644
	0.377966	0.12917	0.669049	0.671272			0.215985289323758						0.47787	0.4218	0.378038	0.264874			0.251263	0.110739	0.444335	0.199525
	0.606795	0.239346	0.517401	0.308394			0.0682212929026908						0.416616	0.176234	0.327257	0.0318581			0.637064	0.203468	0.354863	0.833885
	0.472319	0.533258	0.784066	0.16386			0.393309968665368						0.393266	0.33984	0.272696	0.287351			0.73773	0.715057	0.156147	0.579486
	0.189444	0.349112	0.403989	0.503779			0.442128182762126						0.107045	0.0636272	0.338585	0.0363211			0.0510538	0.0554564	0.318631	0.104619
	0.60575	0.297429	0.466603	0.463821			0.181134661550339						0.5833	0.33963	0.847843	0.0201846			0.200324	0.238474	0.0419853	0.113809
	0.191283	0.707306	0.424924	0.533319			0.178731223694089						1.25995	0.0734104	0.195291	0.373468			0.547334	0.162678	0.227634	0.0499156
	0.38004	0.769548	0.491432	0.526809			0.154290158083254						0.126177	0.426782	1.17216	0.0195476			0.477824	0.135258	0.691844	0.452529
	0.22839	0.439282	0.36594	0.0568183			0.239331317358086						1.19816	0.106681	0.577228	0.609232			0.515596	0.24037	0.513884	0.595778
	0.275309	0.395198	0.435325	0.181879			0.511401274959372						0.800488	0.399598	0.109515	0.0226815			0.749728	1.02417	0.134025	0.0780529
	0.649091	0.293902	0.343407	0.0492739			0.826165828070859						0.138099	0.0642513	1.73385	0.441856			0.045055	0.138298	0.229848	0.123178
	1.04638	0.491287	0.553289	0.68974			0.248813773896082						0.376159	0.155684	0.370068	0.0385474			1.12758	0.22673	0.777641	0.692919
	0.456893	0.17533	0.452064	0.368876			0.285539509197130						0.252128	0.400355	0.430527	0.0189552			0.675088	0.209586	0.0536459	0.068529
	0.901508	0.121752	0.425396	0.276901			0.124371559408286						0.514873	0.134505	0.12767	0.629193			0.189111	0.234874	0.0820859	0.221
	0.284782	0.804172	0.31524	0.520545			0.416674912793310						0.158665	0.201138	0.368852	0.419653			0.0144177	0.195774	0.0402705	0.0609764
	0.242834	0.409973	0.309241	0.431408			0.170583156234988						1.26742	0.420839	0.204714	0.26841			0.152692	0.588767	0.846228	0.166755
	0.613795	0.867305	0.4145	0.425318			0.819929081845626						0.477299	0.300482	1.00639	0.269102			0.958173	0.860995	0.592684	0.25956
	0.258889	0.557459	0.17591	0.408408			0.281516208242642						1.08351	0.730344	0.25473	0.0185985			0.2814	0.384183	0.336604	0.402347
	1.06166	0.399371	0.214231	0.525672			0.391313556566539						1.11612	0.0745743	1.85592	0.0285626			0.296766	1.50538	0.248807	0.54867
	0.114427	0.846511	0.0995967	1.1131			0.305939929924031						0.198325	0.463871	1.01385	0.371917			0.355307	0.210881	0.0589309	0.264041
	0.849397	0.196687	0.265873	0.628493			0.810146557669552						1.20676	0.679248	0.243212	0.0239261			0.171048	0.0523918	0.0672841	0.335887
	0.959558	0.308945	0.426941	0.212043			0.468294320817936						0.104072	0.25712	0.380848	0.140735			0.668158	0.71132	0.257592	0.202641
	0.448974	0.421545	0.39604	0.310845			0.160777973415555						0.272273	0.270323	0.226994	0.439113			0.567925	0.215616	0.291963	0.166164
	1.41062	0.212237	0.239863	0.464626			1.12101040497153						1.12942	0.263051	0.603469	0.368262			0.0991615	0.928219	0.467037	0.306263
	0.105662	0.552618	0.343803	0.422179			0.538977077583742						0.578605	0.691578	0.0676171	0.158954			0.209871	0.552214	0.326633	0.244061
	0.316501	0.0956109	0.653566	0.40907			0.295462771252486						0.959683	0.339167	0.496051	0.237139			0.0352546	0.131238	0.364658	0.0461317
	0.704511	0.380312	0.548049	1.24925			0.317330734726517						0.575043	0.137058	0.0499002	0.307217			0.735973	0.200635	0.0856948	0.201498
	0.640334	0.872505	0.231627	1.9607			0.249462623956577						0.0703549	0.0974759	0.12807	0.611237			0.505476	0.307939	0.438722	0.473875
	1.07787	0.509779	1.72026	0.588916			0.242917714789356						0.12434	0.198587	0.156804	0.0982832			0.0775536	0.192208	0.337853	0.221454
	0.143017	0.242988	0.479986	0.601748			0.290492446272784						0.976035	0.211843	0.137215	0.413998			0.372021	0.360309	0.646891	0.529476
	0.332642	0.832856	0.551157	0.720561			0.839046924701505						0.989897	1.70281	0.0605858	0.393883			0.134023	0.172904	0.427076	0.710525
	0.584601	0.134308	0.159103	0.336652			2.53063387222972						1.42899	0.221886	0.677023	0.483491			0.148994	0.166099	0.621964	0.742337
	0.811777	0.0554337	0.343794	1.55184			0.387897099815056						0.209837	1.90765	0.0430034	0.228753			0.411397	0.157062	0.362879	0.242906
	0.715237	0.493885	0.48304	0.259567			0.374045113731773						0.736569	0.208509	0.143465	0.634871			0.158501	0.686846	0.385131	0.508305
	0.521696	0.501131	0.473948	1.48841			0.344303051098044						0.937376	0.401417	0.374772	0.349743			0.959001	0.433606	0.971035	0.716174
	0.923831	0.223825	0.254129	0.262953			1.78934501253263						0.849709	0.125838	0.617431	0.172308			0.320144	0.895013	0.394817	0.51706
	0.28523	0.128079	0.153977	0.196762			0.361469689788387						0.679311	0.445087	0.817187	0.0600737			0.781484	0.179177	0.196534	0.197419
	0.560996	0.281286	0.41851	0.40425			0.930024303343773						1.37743	0.901994	0.0420524	0.965858			0.28284	0.492738	0.264444	0.326349
	0.293127	0.44519	0.0842083	0.36064			0.346667785915407						1.12093	0.35757	0.652682	0.909855			1.15628	0.24563	0.218883	0.667906
	0.316384	0.134442	0.921581	0.256327			0.760941297745604						0.6098	0.929811	0.368967	0.305695			0.440702	0.219889	0.112641	0.105857
	0.776267	0.826754	0.0758952	0.335742			0.492946286366439						0.54011	0.175315	0.149214	0.186843			0.126746	0.731371	0.0681483	2.19967
	0.119954	0.747764	0.445417	0.628561			1.86712274120433						0.44492	0.195757	0.144833	0.0937483			0.757697	0.506631	0.192834	0.704051
	0.0252063	1.23844	0.113303	0.554687			0.776082955939381						0.208322	0.275168	1.29026	0.215328			0.158324	1.01642	0.327691	0.346822
	0.9932	0.126396	0.176547	0.502619			0.386014636811280						0.627016	0.334243	0.0453326	0.459896			0.72474	0.267928	0.190315	0.24256
	1.29576	0.234892	0.332155	0.371656			0.519816913451184						1.06844	0.644273	0.533257	0.222209			1.02723	0.106925	0.36164	0.073773
	0.118594	0.353252	0.38667	0.144495			0.521835005945242						0.308461	0.29058	0.419832	0.675781			0.224544	0.260202	0.433671	0.288185
	0.701269	1.31555	0.15526	0.24475			0.473119373526400						0.520568	1.41838	1.03057	0.151934			0.189524	0.759235	0.197202	0.215824
	1.02908	0.807287	2.17261	0.834999			0.423183384074397						0.426471	0.433732	1.80392	0.341356			0.236675	0.51398	0.568702	0.152486
	0.521589	0.222229	0.0429639	0.701982			0.161775613453685						0.390233	0.555085	1.8848	0.708423			0.443973	0.289928	0.754759	0.223983
	0.343639	0.0869376	0.235917	0.606373			0.225124575203473						0.386119	0.41402	0.300782	0.649477			0.475565	0.442632	0.179147	0.45814
	0.275347	0.177827	0.0913161	0.232305			0.193804928101410						0.155563	0.211575	0.418067	0.169741			0.238083	0.069188	0.559516	0.118176
	0.398327	0.54793	0.127898	0.52816			0.559486356329089						1.27444	0.593818	0.172689	0.366701			0.93959	0.172548	0.500824	0.209955
	0.0828506	1.56193	0.501219	0.708334			0.880372585554940						0.766156	0.130991	0.238955	0.861649			0.573487	0.915515	0.333763	1.22942
	0.549118	0.271605	0.278687	0.98545			0.199492173804079						0.842877	0.190332	0.650267	0.283343			0.47292	0.109299	1.15675	0.309328
	0.797625	0.275365	0.512468	0.266554			0.437307423928144						0.569497	0.245975	2.09211	0.308499			1.26331	0.499112	0.289569	0.796314
	0.355336	0.263207	0.688877	0.274799			0.635247999998072						0.163032	0.622844	0.0648382	0.174882			0.14956	0.363502	0.270112	0.784981
	0.311584	0.0708087	0.2364	0.333813			0.566098183466202						0.517929	0.301138	0.416248	0.84156			0.765106	0.439763	0.42167	0.624552
	0.739868	0.589538	1.16634	0.359476			0.459217968038213						0.330351	0.651247	0.245325	0.199936			0.305257	0.452297	0.610753	0.178135
	0.320317	0.261334	0.292821	0.621758			0.481889047014240						0.212531	1.97819	1.43264	0.295329			0.279641	0.441928	0.276405	0.24489
	0.502779	0.176954	0.275108	0.270533			0.297437414007269						0.593094	1.14935	0.138396	0.318527			0.266411	0.43775	0.427257	0.289916
	0.133833	0.328377	0.102645	0.190763			1.00184313115212						0.0758636	0.087307	0.583655	0.263971			0.224369	0.254886	0.459735	0.369401
	0.644555	0.206554	0.446099	0.330642			1.88292994888406						0.220067	0.155416	0.548033	0.677244			0.438539	0.130287	0.548809	0.493271
	0.206433	0.570695	0.873087	0.415892			0.606007838816465						0.253111	0.117758	0.930834	0.761672			0.901077	0.382137	1.40503	0.129665
	0.304678	0.0863937	0.458704	0.214551			0.729441453249138						0.0867552	0.287441	0.241979	0.229211			0.671088	0.232102	0.219706	0.374262
	0.806169	0.0848286	0.318075	0.367358			0.0819912943429425						0.147289	0.155034	0.331019	0.986811			0.539591	0.184203	0.338092	0.287645
	1.11848	0.0826296	0.346759	0.3742			0.661455617380561						0.556357	0.185612	1.0271	0.678624			0.393987	0.298398	0.449454	0.238629
	0.224935	0.292955	0.237459	0.828017			0.579782742796467						0.315729	0.234951	0.278395	0.547765			0.599691	0.2585	0.709319	0.193091
	0.304776	1.55278	0.279378	0.960716			1.69933343125095						0.771025	0.0750021	1.27637	0.215388			0.267946	0.298062	0.260231	0.381588
	0.14206	1.65499	0.660619	0.887195			2.66928403018660						0.470813	0.35107	0.0604744	1.85727			0.0759162	0.74191	0.444767	0.640255
	0.243447	0.528583	1.00298	1.18962			0.305620957760759						0.371823	0.151334	0.130223	0.61907			0.42333	0.16596	0.146785	0.346087
	1.26078	0.13147	0.480649	1.39982			0.558469549958073						0.223765	0.28687	0.223713	2.06175			0.411146	0.0665695	0.302268	0.809204
	0.378659	0.555692	0.486241	0.0716108			1.11492441297325						0.340488	0.200467	0.301445	0.21581			0.673403	0.124849	0.0323241	0.204585
	0.6419	0.396905	0.601624	0.137847			0.471376614118841						0.0711471	0.297412	1.07011	0.533123			0.560423	1.25308	0.282485	0.255176
	0.326653	0.322483	0.448129	0.287325			0.655675537232904						0.14661	0.342379	0.102809	0.177759			0.895839	0.183899	0.468733	1.25594
	0.91993	0.250089	0.549494	0.584319			0.353038864563291						0.249191	0.363211	0.112379	0.492005			0.321557	0.920697	0.0400536	0.32025
	3.00608	0.90227	0.803401	0.126709			1.23735690311150						0.172925	0.136164	0.123925	0.233832			0.51193	0.224407	0.273485	0.0837179
	0.118339	0.543658	0.298868	0.493132			0.458994070840064						0.505669	0.0684621	0.33505	0.179142			0.584139	0.936725	0.0958094	0.562154
	0.0876809	0.303951	0.665061	0.372314			0.470815551883184						0.142504	0.42379	0.098363	0.154021			0.189735	0.177761	0.424876	0.190259
	0.279807	0.451276	0.573296	1.4114									0.375362	0.116488	0.631607	0.33643			0.285504	0.33714	0.16543	0.771584
	0.242462	0.726882	0.765503	0.530726									0.254333	0.388453	0.212974	0.303726			0.145383	0.867969	0.118673	0.387467
	0.397291	0.888718	0.334763	0.385414									0.283323	0.0441616	0.134183	0.355146			0.822047	0.198961	0.368331	1.12533
	0.362124	0.448588	0.486175	0.505977									0.610607	0.0983162	0.701331	0.155334			0.828318	0.0844349	0.336826	0.121091
	0.403674	0.0530429	0.271697	1.52847									0.322088	0.150003	0.362611	0.336961			0.453585	1.28082	0.475844	0.216939
	0.12578	0.363337	0.252617	0.366136									0.904475	0.152334	0.371383	0.09			0.212551	0.350645	1.05218	0.297768
	0.475859	0.984939	0.457892	1.60935									0.53764	0.125743	0.0634484	0.0936698			0.272207	0.454806	0.387232	0.0652974
	1.79575	0.355735	0.614594	0.792005									0.140913	0.0933231	0.554993	1.75064			0.495638	0.957905	0.553778	0.287125
	0.366302	0.410175	1.26223	0.653092									0.257683	0.0423737	0.170727	0.394838			0.587599	0.842829	0.179708	0.255525
	0.555849	0.2921	0.834046	0.610679									0.0832602	0.389566	3.37385	0.425505			0.321484	0.384856	0.519374	0.652023
	0.310162	0.325923	0.930761	1.52933									0.0551683	0.319744	0.311935	1.35956			0.851226	0.11025	0.0678352	0.0952712
	0.999593	0.117631	0.485629	0.208641									0.331165	0.0658855	0.455881	2.42113			0.232461	0.342921	0.107239	0.514774
	0.40997	0.0802511	0.496946	0.266898									0.0947073	0.171995	0.232413	1.64122			0.411544	0.196576	0.536212	1.13996
	1.1508	0.21354	1.00843	0.770583									0.239608	0.0367253	0.446016	1.58615			0.486007	0.249142	0.157967	0.356736
	0.912345	1.79466	1.38043	0.309168									0.533912	0.288754	0.0919076	0.305756			0.135887	0.398989	0.318201	0.219764
	0.165409	0.302586	0.144436	0.570869									0.17704	0.0692109	0.233822	1.02555			0.38363	1.42147	0.600301	0.551852
	0.311574	0.325571	0.334352	0.278057									0.344497	0.24299	0.28079	1.07407			0.171789	0.615069	0.0752174	0.345166
	0.240243	0.196336	0.280231	0.230502									0.222489	0.244996	0.0975689	0.140839			0.394564	0.354409	0.205343	0.135911
	0.388595	0.235896	0.0655241	0.697074									1.2013	0.486685	0.268937	0.796897			0.469454	0.966175	0.387217	0.444865
	0.35679	0.0556538	0.19645	0.470639									0.169372	0.108206	0.400828	0.743013			1.00186	0.123498	0.431473	0.258283
	0.267639	0.268103	0.318655	0.46569									0.601667	0.211111	0.534851	1.31313			0.167527	0.144971	0.739996	0.371744
	0.286635	0.328246	0.0954976	0.684681									0.353594	0.0707602	0.855091	0.260155			0.638941	0.279615	0.420793	0.278351
	0.402024	0.255534	0.192694	0.779325									0.129212	0.500529	0.939661	0.944864			0.153784	0.189595	0.461602	0.872728
	2.02682	0.721566	0.542546	0.761548									0.0717091	0.220546	0.182524	1.41516			2.0928	0.0415861	0.885878	0.269505
	0.719709	1.32596	1.03644	0.467903									0.197871	1.15952	0.146915	0.551469			0.116819	0.476426	1.12705	0.286817
	0.754818	0.400225	0.196428	0.866161									0.103297	0.732903	0.395815	0.943989			0.280082	0.686853	0.40157	0.0944531
	2.31789	0.378475	0.220374	1.27104									0.695639	0.312003	0.329525	1.48691			0.376552	0.227882	0.105552	1.27029
	0.233748	0.613349	0.0606671	0.354178									0.515247	0.284303	0.117663	1.17798			0.38873	0.467865	0.0543826	0.410211
	1.49634	0.171516	0.413538	0.473089									0.137074	0.457643	0.258902	0.394778			0.626424	0.220347	0.457616	0.109981
	0.296325	0.609368	0.720128	0.946078									0.635839	0.281227	0.0969667	0.957729			0.686234	0.264408	0.0387582	0.651526
	0.198329	0.222524	0.465061	0.301881									1.12013	0.142259	0.060457	0.634002			0.00615271	0.476213	0.264586	0.193694
	1.0586	0.148771	0.154152	0.665241									0.511011	0.522188	0.196451	1.21535			0.177526	0.417437	0.604352	0.0667626
	0.542898	0.181148	0.0839538	0.283453									0.241588	0.292392	0.792059	0.237434			0.590021	0.383306	0.269359	0.139156
	0.78987	0.250116	0.296441	1.03173									0.139576	0.0534823	0.204903	0.255209			0.509537	0.155706	0.637038	0.572857
	0.169479	0.455177	0.121423	0.83538									0.466234	0.243246	0.931355	0.385457			0.462547	0.390769	0.507007	0.640194
	0.742737	0.821186	0.127315	0.487186									0.599952	0.948635	2.04793	1.04146			0.914501	0.211663	0.403234	0.233999
	0.373269	0.365331	0.135926	0.205072									0.386544	0.356778	0.149417	0.559711			0.320955	0.170513	0.0985817	0.35064
	0.701677	0.342071	0.824841	1.21755									0.226583	0.190377	0.308109	0.543226			0.567751	0.112584	0.199389	0.32906
	0.26028	0.405984	0.304327	0.408243									0.384001	0.0556413	0.163105	0.907414			0.244467	0.228201	0.563834	0.369783
	0.151585	0.605196	0.117896	0.389139									0.20135	0.428126	0.389005	0.661811			0.835549	0.0912772	1.05699	0.529996
	0.505222	0.160025	0.359906	0.15737									0.33479	0.617058	0.379857	1.00713			0.00561468	0.170897	0.408142	0.168769
	0.0790826	0.507208	0.0441534	0.77283									0.265813	0.197223	0.108063	0.40445			1.42527	0.091796	0.19474	0.66172
	0.680735	0.269855	0.16122	0.0813758									0.107604	0.135204	0.333457	1.25855			0.00694606	0.331025	0.402855	0.0686848
	0.32078	0.23547	0.35742	1.15441									0.397905	0.47869	1.2676	0.353592			0.391183	0.236932	0.633761	0.238172
	0.270309	0.444296	0.418426	0.742302									0.245099	0.427246	0.178587	0.620926			0.363196	0.569701	0.843562	0.203767
	0.269762		0.355406	0.691372									0.74811	0.409504	0.109584	0.495171			0.350513	0.225123	0.503591	0.264735
	0.43478		0.119941	2.05092									0.301732	0.0349878	0.265496	0.261087			0.0136041	0.453867	0.548185	0.175027
	1.02946		0.447354	0.351913									0.160219	0.180874	0.104684	0.726763			0.440729	0.43195	0.293746	0.134721
	0.575459		0.326267	0.604745									0.295002	0.179835	0.208149	0.897462			0.465873	0.085498	0.145054	0.219337
	0.343947		0.128666	1.49123									0.355119	0.508036	0.195205	1.92333			0.00861946	0.128692	0.175384	1.10404
	1.07176		0.147334	0.868155									0.152912	0.565238	0.285819	0.236323			0.435005	0.138108	0.650337	0.461703
	0.371617		0.541661	0.785866									0.226272	0.350122	0.336332	0.313549			0.692044	0.0893346	0.716089	0.572101
	0.504158		0.149209	0.230185									0.273481	0.124826	0.36485	0.653086			0.00316797	0.236338	3.84536	0.860059
	0.865114		0.322306	0.33638									1.24078	0.221061	0.0942111	0.0819277			0.957875	0.166016	0.458647	0.327614
	0.444313		0.303313	0.409291									0.344071	0.131774	0.304285	0.0423787			0.196839	0.230004	0.294006	0.239697
	0.423089		0.203558	0.650431									0.102762	0.318021	0.112538	0.196811			0.361421	0.181947	0.451935	0.671046
	0.435681		0.147032	0.414982									0.0992406	0.308017	0.0509987	0.108591			0.317805	0.217682	1.22675	0.768019
	0.844618		0.619098	0.94713									0.254425	0.376252	0.0667685	0.104904			0.268201	0.202622	0.248454	0.396176
	0.218897		0.209412	0.904328									0.157643	0.199228	0.484886	0.608509			0.262089	0.0577613	0.63064	0.292065
	1.63221		0.610629	1.0926									0.283051	0.143763	0.243996	4.41028			0.25665	0.241092	0.150814	0.142681
	0.147088		0.184463	0.734625									0.61864	0.0895367	0.666628	0.293832			0.308143	0.365858	0.542169	0.206154
	0.25061		0.235843	0.937349									0.435966	0.20462	0.100122	0.556076			1.00137	0.0987405	1.04771	1.18713
	0.618357		0.245711	0.873011									0.579477	0.337234	0.227136	2.038			0.126389	0.353374	0.122155	0.537959
	0.331341		0.572558	0.574982									0.223788	0.959879	0.373147	0.644738			0.0422394	0.294725	0.270836	0.471574
	1.69116		0.44392	0.694099									0.172013	0.41179	0.935152	0.501889			0.2275	0.317882	1.92751	0.47484
	0.513117		1.12657	0.801871									0.330276	0.128685	0.414057	0.95692			0.388096	0.533365	0.693277	0.856499
	0.0812855		0.647929	0.789473									0.120525	0.269551	0.243621	0.341239			0.434434	0.502964	0.793029	0.920133
	0.648144		0.13955	0.751339									0.421718	0.108413	0.228533	0.303278			0.280557	0.419318	1.35317	0.404367
	0.427515		0.768237	0.63735									0.615043	0.192681	0.274709	0.728532			0.524743	1.031	0.875788	0.596602
	0.441564		0.927349	0.304674									0.703132	0.225992	0.391928	1.4704			0.416122	0.350819	0.216489	0.712189
	0.558457		0.607953	0.39673									0.0701475	0.77092	0.543852	0.616964			0.235715	0.309527	0.11018	0.382515
	0.289266		0.315352	2.27155									0.319707	1.06841	0.393145	0.518308			0.761502	0.17496	0.389415	0.587499
	0.306264		0.350543	0.56339									0.438536	0.45279	0.0817983	0.424113			0.286987	0.673979	0.348289	0.0673709
	0.36188		0.157949	0.364254									0.412311	0.150785	0.847101	0.0462823			0.493861	0.541577	0.702829	0.740351
	0.364961		0.2893	1.06277									0.188408	0.141496	0.0590191	0.486418			0.389995	0.0671494	0.27236	0.192948
	0.927994		0.0902877	0.248333									1.28023	0.079521	0.307587	0.136788			0.220198	0.182043	0.144631	1.09298
	0.991386		0.276597	0.346444									0.575004	0.449303	0.0778618	0.203305			0.130576	0.399107	0.12857	0.299713
	0.843886		0.378886	0.16581									0.438153	0.744956	0.15796	0.464703			1.16545	0.289094	0.0793001	0.177403
	0.315577		0.199173	0.340924									0.572864	0.385461	0.0520818	0.152019			0.106296	0.853792	0.401521	0.514371
	0.628729		0.147531	0.270672									0.286802	0.494793	0.807302	0.809494			0.187816	0.518285	0.100821	0.409092
	0.308994		0.138739	0.824453									1.30593	0.475452	0.279603	0.567802			0.838628	0.310906	0.416798	0.874126
	0.484951		0.189354	0.273745									0.643067	0.114566	2.19353	0.0628829			0.420889	0.206545	0.264729	0.764193
	0.376587		0.208301	0.323582									0.289493	1.3536	0.0511277	1.20216			0.11794	0.267348	0.145461	0.28241
	0.563064		1.01785	0.180282									0.152699	0.381738	0.3515	0.036909			0.13891	0.177913	0.0709941	0.408054
	0.131531		0.848507	0.333289									0.248799	0.403907	0.0279894	1.59897			0.753425	0.0984094	0.846095	0.0714569
	0.661812		1.20852	0.390604									0.208721	0.109268	0.0900019	0.185598			0.327472	0.259969	0.261857	0.730768
	0.248704		0.39539	1.11274									0.257199	0.521166	0.0469314	0.0406147			0.264252	0.109483	0.323233	0.48552
	0.734872		0.289118	2.00366									0.306859	0.0995169	0.0709757	0.739285			1.05712	0.409506	0.317844	0.575525
	0.553079		0.246456	0.820325									0.403081	0.333766	0.229193	0.460992			0.457469	0.173513	0.966189	0.336565
	0.413197		0.110841	0.802624									0.205241	0.302216	0.711294	0.050811			0.426627	0.206656	1.07821	0.284791
	0.243328		0.0960026	0.757637									0.699366	0.0539487	0.0201687	0.538579			0.383711	0.365412	0.801557	0.272952
	0.32307		0.132584	0.783765									0.501156	0.310922	0.0383674	0.0653424			0.41933	0.969607	0.297939	0.321765
	0.571568		0.557473	0.76172									0.712853	0.83571	0.286334	0.0319844			0.298984	0.195814	0.0499414	0.514213
	0.598453		0.144421	0.739915									0.502249	0.301162	0.208018	0.258378			0.255123	1.29322	0.559243	0.244191
	0.369873		0.601309	0.0231777									0.0609832	0.351776	0.0439727	0.197635			0.260418	0.703157	0.20167	0.192794
	0.462771		0.0597536	0.350273									0.30332	0.241792	0.163573	0.211879			0.535934	0.0452545	0.640293	0.152058
	1.25159		0.180968	0.100191									0.143533	0.576512	0.0339529	0.11382			0.570184	0.378972	1.38795	0.380537
	0.293606		0.407927	1.51862									0.414625	0.185129	0.449666	0.0909103			0.737319	1.39776	0.17659	0.114332
	0.581353		1.99109	0.192703									0.0827961	0.711546	0.153185	0.0967013			0.295186	0.261133	0.167224	0.202945
	0.797099		0.188285	0.609112									0.420431	0.0903589	0.0313458	0.0472381			0.533924	0.382099	0.159548	0.29141
	0.342318		0.969406	0.433954									0.254569	0.369426	0.306605	0.0666863			0.247081	0.713075	0.253968	0.170184
	0.0844269		0.139442	1.38167									0.645442	0.35382	0.0331233	0.201838			1.48255	0.604905	0.156181	0.340247
	1.34523		0.567994	0.298929									0.800469	0.743962	0.0824366	0.503919			0.431191	0.281821	0.169035	0.224193
	0.645988		0.172799	0.53977									0.797556	0.047278	0.357327	0.160729			0.155625	0.929448	1.52162	0.0907445
	0.438242		0.368758	1.35364									0.693686	0.37832	0.0521654	0.0910584			1.31465	0.270343	0.653748	0.222424
	0.439702		0.618186	0.774726									0.0306973	0.559989	2.17662	0.131138			0.140364	0.38867	0.46364	0.485841
	0.782358		0.829971	0.476542									0.287204	0.651283	0.332966	0.489184			0.171837	0.34145	0.195334	0.287292
	0.258292		0.124248	0.269144									0.260856	0.144286	1.00746	0.108149			0.305759	0.375246	0.188636	0.552551
	0.485689		0.48622	0.690767									0.63041	0.257792	0.116461	0.0942234			0.285911	0.251539	0.667647	0.220628
	0.0882373		0.468209	0.219684									0.419703	0.871963	0.607834	0.103282			0.50767	0.414551	0.557303	0.151809
	0.468627		0.0762893	0.256371									0.651183	0.173694	0.163097	0.333141			0.47665	0.149302	0.525893	0.176795
	0.268491		0.130334	4.57033									0.155761	0.214277	0.544784	0.387167			0.633299	0.437075	1.13421	0.209778
	0.0959224		0.37551	0.458657									1.05516	0.289927	1.18634	0.0700832			0.179191	0.187655	0.611403	0.115489
	0.180613		0.20814	1.11758									0.101098	0.646094	0.816229	0.68765			0.282443	0.690686	0.253676	1.19162
	0.621649		0.230962	0.899927									0.246297	0.182136	1.30932	0.256347			0.27989	0.264802	0.203738	0.880103
	0.36623		0.242092	0.400939									0.706683	0.182039	0.776597	0.172755			0.523305	0.0390639	0.711573	0.674358
	0.453129		1.8132	0.301189									0.428009	0.418371	0.880521	0.871162			0.515733	0.297793	0.439555	0.140282
	0.660037		0.338985	0.371635									0.169912	0.247276	0.460129	0.532313			0.200304	0.132477	0.475798	0.440971
	0.12758		0.638763	0.345127									0.494167	0.851775	0.363404	0.125286			0.154203	0.275362	0.631547	0.202201
	0.311435		0.655805	0.278238									0.622743	0.203836	0.722104	0.106662			0.412433	0.455719	0.242323	1.01785
	0.167269		0.480605	0.255308									0.698794	0.5103	0.500401	0.0222032			0.624231	0.21024	0.384985	0.155834
	0.630652		0.560047	0.406336									0.466483	0.398937	1.38188	0.118626			0.356748	0.428524	0.57766	0.489217
	0.356522		0.306137	0.579832									0.101422	0.128079	0.229609	0.105472			0.614163	0.711204	0.174638	0.340978
	0.0533604		0.169102	0.377674									0.139826	0.40528	0.551363	1.18888			0.379534	0.167707	1.34229	0.19766
	0.142603		0.542316	0.272536									1.30429	1.05104	0.403491	0.463496			0.657961	1.50209	0.191471	0.296915
	0.100598		0.57275	0.507451									0.076859	1.976	0.262986	0.363809			0.234746	0.299685	0.216563	0.513601
	0.199551		0.172578	0.231576									0.379196	0.793859	0.549185	0.37459			1.03187	0.0115175	0.186612	0.166699
	2.00256		0.357228	0.0823709									0.0844648	0.31381	0.0216683	0.0389706			0.276064	0.26443	0.433206	0.376116
	0.44065		0.0656039	0.500875									0.499064	0.539274	0.35882	0.222617			0.278975	0.278293	0.196883	0.322184
	0.29594		1.61634	0.90535									0.0344537	0.659258	0.32649	0.0480809			0.244454	0.0217601	0.136944	0.187795
	0.180432		0.644501	0.202283									0.582149	0.342139	0.366695	0.514802			0.310305	0.155106	0.421922	0.282173
	0.586803		0.0693745	0.108983									0.0952481	0.154026	1.02463	0.0688114			0.317952	0.292421	0.336864	0.385103
	0.242616		0.575233	0.46416									0.145811	0.366919	0.342991	0.0418667			0.194396	0.607852	2.01342	0.421633
	0.335292		0.566583	0.269936									0.579359	0.200736	1.4479	0.144234			0.13046	0.526374	0.754335	0.303278
	0.250405		0.507709	1.56787									0.183946	0.544814	0.349309	0.0195019			0.578725	0.482103	0.222792	0.253348
	0.219929		0.386458	0.244891									0.782891	0.155353	0.598013	0.286228			0.363792	0.638876	0.360385	0.850454
	0.200746		0.24271	0.328477									0.2135	0.118625	0.322338	0.00911053			0.434831	0.58574	1.50718	0.38449
	0.0623563		0.140989	0.710533									0.613429	0.315176	0.224057	0.0668649			0.292391	0.491687	0.688545	0.593088
	0.360753		0.227582	0.349305									0.609957	1.18565	0.467286	0.0173199			0.179339	0.732303	0.407036	0.747058
	0.467134		0.401699	0.324346									0.365047	0.297284	0.471076	0.0439802			0.580935	0.563471	0.916229	0.383991
	0.356853		0.208483	0.339877									0.203987	0.553989	0.286142	0.0214586			0.288033	0.885107	0.134334	0.271879
	0.368865		0.292027	0.145299									0.73044	0.188679	0.76769	0.0878303			0.0518497	0.327389	0.599491	0.420311
	0.087103		0.443293	0.381029									0.128919	0.168274	0.223255	0.539197			0.33615	0.437214	1.41619	0.762855
	0.143689		0.224265	1.41402									1.02568	0.128719	0.189952	0.334909			0.220732	0.94026	0.123703	0.3268
	1.2103		0.339239	0.430601									0.158498	0.160032	2.45331	0.657441			1.8598	0.297584	0.578708	0.37684
	0.991692		0.373149	0.136743									0.663216	0.635262	0.808678	0.0621329			1.32116	0.33499	0.298361	0.527549
	0.546668		0.521042	0.641797									0.356428	0.129412	0.384247	0.338906			0.178931	1.56291	0.395892	0.28055
	0.61659		0.276779	0.269405									0.256073	0.527761	1.58714	0.102239			0.263524	0.813812	0.909964	0.691842
	0.191104		0.887723	0.709485									0.713952	0.0383252	1.78377	0.372557			0.242219	0.546923	0.670235	0.302776
	0.806825		1.31912	0.643189									0.310109	1.46176	0.608719	0.493125			0.258861	0.426432	0.411635	0.343143
	0.164064		0.913459	0.617888									0.511304	0.0556143	0.25251	0.0213552			0.687787	0.0645677	0.287151	0.171316
	0.200377		1.52403	0.6651									0.144683	0.237912	0.276041	0.235948			0.293282	0.702455	1.5702	0.277781
	0.188831		0.792065	0.215021									0.437636	0.0607851	1.20127	1.32847			0.576757	0.232814	0.632924	0.485283
	0.0628878		0.302513	0.753066									0.028658	1.22546	0.343953	0.05474			0.230385	0.173028	0.607137	1.38633
	0.2279		0.687728	0.241493									0.318893	0.295046	0.140151	0.0277206			0.108572	0.438911	0.304047	0.0676513
	1.06387		0.364998	0.283608									0.0445207	0.767309	0.0623872	0.880541			0.286262	0.346379	0.923458	1.01498
	0.349457		0.46899	0.361105									0.0931762	1.01904	0.791889	0.778775			0.232925	0.85041	0.315308	0.366975
	0.248245		0.531671	0.533954									0.0953668	0.0921047	0.0827924	0.0174606			0.170876	1.17127	0.256256	0.268416
	0.678411		0.177634	0.605786									0.408657	0.0629316	0.279966	0.220666			0.738533	0.200205	0.333121	0.326339
	0.308846		0.165673	0.565599									0.0616013	0.0159479	0.110191	0.391739			0.246494	0.154009	0.695772	0.723272
	0.436895		0.563966	0.506901									0.0899613	0.0791374	0.271913	0.0535442			0.250201	0.415803	0.534494	0.110178
	0.520815		0.814835	0.460342									0.150451	0.371929	0.418496	0.257121			0.250275	0.232116	0.216095	0.214164
	0.870096		0.736617	0.606232									0.583219	0.246333	0.304495	0.316153			0.732244	1.01243	0.465976	0.26635
	0.235586		0.318682	0.133718									0.20602	0.238038	0.140169	0.0250898			0.197546	0.600404	0.51	0.616825
	0.694669		0.382131	0.304355									0.477174	0.2982	0.16284	1.45909			0.235889	0.140206	0.234014	0.142551
	1.22256		0.99173	0.21543									0.468448	0.398548	0.537018	0.566563			0.253188	0.637332	0.811058	0.321002
	0.335088		0.204211	0.213811									0.397481	0.336834	0.191082	0.072719			0.653146	0.371259	0.433297	0.452961
	0.848029		0.36517	0.531867									0.673391	0.399016	0.669918	0.182			0.504768	0.414804	0.401741	0.236471
	1.62686		0.770228	0.419268									0.791039	0.524045	0.0483125	0.505521			0.0659762	0.255834	0.422538	0.342294
	1.03269		0.484058	0.4447									1.50534	0.184712	0.0466964	0.990342			0.780165	0.549318	0.20879	0.236001
	1.06369		0.973546	0.182232									0.167419	0.162881	0.718422	0.260258			0.372944	1.4015	0.919566	0.0867599
	0.7306		0.526766	1.12488									0.3608	0.738317	0.148728	0.138702			0.792241	0.360922	0.366156	0.197456
	0.470281		0.261457	0.78247									0.857284	0.385535	0.0960595	0.234506			0.743559	1.05026	0.215137	0.202629
	0.497881		0.145272	0.0834112									0.238525	1.1407	0.244175	0.0218184			0.114693	0.367114	0.215774	0.90909
	0.823461		0.767627	0.101006									0.212869	0.199181	1.1342	0.261752			0.584501	0.576367	0.362737	0.241796
	1.08027		0.66316	0.218675									0.572095	0.46028	0.600268	0.346791			0.474635	0.483587	0.638285	0.277767
	0.891776		0.251525	1.10379									0.133898	0.287006	0.179669	0.466813			0.368603	0.301879	1.06992	0.399704
	1.76057		1.3705	0.597033									0.503784	0.483776	0.122621	0.238976			0.289315	0.207286	0.458348	0.0884203
	1.33137		0.87038	1.19537									0.264182	0.313183	0.411205	0.842587			0.666413	0.240131	0.351594	0.367923
	0.533866		0.332468	0.390288									0.294677	0.216418	0.0809482	0.44691			0.390674	0.12775	0.578403	0.242433
	0.613927		0.343541	0.338222									0.395311	0.421191	0.20067	0.0316867			0.117818	0.0608512	0.497693	0.113774
	0.318821		0.512492	0.284905									0.430307	0.186324	0.167631	0.197046			0.160043	0.360121	0.30256	0.497542
	0.23805		0.670099	0.435379									0.292094	0.178424	0.10986	0.605527			0.234796	0.325754	0.864013	0.292993
	0.465119		0.346057	2.51263									0.323021	1.12379	0.149249	0.540025			0.347971	0.131344	0.609865	0.420337
	0.257856		0.163549	0.196417									0.109712	0.098931	0.159555	0.216548			0.111679	0.261163	0.31344	0.555614
	0.645792		0.201848	0.409832									0.0365281	0.318781	0.115436	0.323185			0.0655859	0.31793	0.646321	0.167656
	0.252839		0.432771	0.945892									0.146082	1.43525	0.164208	0.417765			0.40166	0.638	0.381854	0.155694
	0.344741		0.351944	0.542132									0.429686	0.107672	0.252255	0.447368			0.781725	0.36509	0.0204999	0.398274
	0.490932		0.293785	0.742167									0.366531	0.661105	0.0465706	0.127275			0.268885	0.172876	0.142078	0.203764
	0.412477		0.768487	0.150406									0.885866	0.253176	0.771875	0.649789			0.359294	0.217163	0.487772	0.0986501
	0.794401		0.434777	0.545845									0.159867	0.121945	0.0263352	1.18575			0.126866	0.593124	0.0281136	0.614472
	0.270068		0.833091	1.41914									0.214911	0.149708	0.161162	0.0384487			0.552081	0.460234	0.148761	0.24448
	0.100889		1.40285	1.11226									0.653853	0.539832	0.152994	0.0343508			0.177448	0.073385	0.707416	0.286881
	0.518216		0.226708	0.605284									0.590908	0.342952	0.118647	0.437304			0.0904979	0.183945	0.00275536	0.271229
	0.582137		0.119824	0.297743									0.193119	0.14714	0.260291	0.0101495			1.35179	0.434104	0.242175	0.493511
	0.247854		0.359093	0.342703									0.146795	0.219833	0.151641	0.305243			0.110736	0.664747	0.533036	0.145138
	0.252705		0.554101	0.846284									0.265596	0.185299	0.314605	0.100772			0.232192	0.372503	0.352404	1.10433
	0.572751		0.058701	0.612749									0.17599	0.225075	0.0736974	0.686643			0.0876262	0.0338938	0.740085	0.386396
	0.314697		0.623048	0.353784									0.409138	0.755344	0.245762	2.11847			0.327272	0.333782	0.091204	0.126245
	0.753403		0.0655956	0.383756									0.809102	0.619927	0.487824	0.618923			0.284373	0.316459	0.336651	0.785427
	0.429599		0.278061	0.279056									0.347557	0.353077	0.211604	0.240364			0.0939034	0.162973	0.140166	0.0658022
	0.164219		0.514207	0.477404									0.28868	0.174507	0.361488	0.926285			0.59602	1.17253	0.534859	0.548904
	1.64874		0.458952	0.314644									0.203223	0.590102	0.174814	0.585204			0.264676	0.298298	0.701003	0.287928
	0.155621		0.335137	0.430684									0.0545859	0.309798	0.143233	0.220763			0.0742727	0.313717	0.0136262	0.272692
	0.71256		0.380846	0.128295									0.542276	0.376239	0.0351794	0.062967			0.168776	0.314406	0.818188	0.195744
	0.0914655		0.0577939	0.266937									0.0689513	0.115961	0.052293	0.0682748			0.40114	0.209189	1.13936	0.415349
	0.602727		0.596592	0.544276									0.653787	0.357723	0.275293	0.304194			0.0963348	0.0976845	0.512459	0.57642
	0.462269		0.592456	0.457864									0.604897	0.105112	0.166532	0.857001			0.297205	0.689835	0.218929	0.861374
	0.371476		0.0703267	0.432355									0.212484	0.396658	0.289586	0.0477852			0.202612	0.392715	0.0465621	0.461199
	0.181526		0.158318	0.356871									0.210867	0.381398	0.0799639	0.691393			0.295653	0.146136	0.538385	0.267846
	0.445324		1.24482	0.141904									0.782152	0.472025	0.584506	0.1298			0.162022	0.491829	1.22566	0.218391
	0.61773		0.155018	0.615829									0.276176	0.761711	0.279767	0.799099			0.532084	0.245839	0.0339606	0.779192
	0.685615		1.15822	0.130655									0.470914	0.219143	0.35126	0.0836035			0.392091	0.253162	0.195795	0.18863
	0.668473		1.09689	0.472434									0.102675	0.211663	0.171238	0.106157			0.709619	0.611236	0.139926	0.604098
	0.54407		0.418493	0.350975									0.259433	0.432783	0.0726692	0.217002			0.476276	0.107335	0.328429	0.260352
	0.223152		0.442387	0.131339									0.149315	0.139242	0.111833	0.593863			0.420773	0.303764	0.569243	0.13164
	0.580266		1.24047	0.371918									0.674231	0.572094	0.563119	0.360599			0.561642	0.161587	0.146915	0.212941
	0.37969		0.225883	0.270474									1.19349	0.358765	0.291943	0.178657			0.299311	0.235345	1.10591	0.147799
	0.341262		0.684926	0.479684									0.311307	0.564625	0.22345	0.40962			0.91567	0.246497	0.503529	0.110747
	0.587518		0.576308	0.181764									0.473506	0.614191	0.442293	0.579885			0.622634	0.399879	0.545143	0.106293
	0.0762585		0.473759	0.426302									0.0844011	0.771549	0.136305	0.448777			0.128165	0.0816221	1.22309	1.30504
	0.145057		0.781735	0.455895									0.234906	0.196807	0.521362	2.66053			0.202535	0.536092	0.543064	0.782407
	0.527832		0.328971	0.594626									0.0689162	0.712227	0.830268	0.0950012			0.280559	0.273098	0.38232	0.125919
	0.754273		0.604924	0.33638									0.175752	0.380644	0.103567	0.401602			0.0921673	0.0618326	0.232141	0.483836
	0.604013		0.859702	0.761553									1.4075	0.295191	0.229946	0.397471			0.205178	0.224019	0.939427	0.238102
	0.278785		0.109451	0.54681									0.587547	0.212591	0.246919	0.167324			0.0931234	0.387204	0.603275	0.561354
	0.437198		0.744291	0.209075									0.208971	0.447052	0.296128	0.118332			0.418361	0.430727	0.296079	0.430023
	0.753716		1.29974	0.58726									0.437917	0.385233	0.309287	0.366677			2.49035	0.518634	1.09002	0.139612
	2.01143		0.562682	0.494988									0.306821	0.780627	0.206482	0.0580199			0.236931	0.652051	0.122117	0.359119
	0.443557		0.264891	0.87071									0.108413	0.422966	0.215344	0.412271			1.52311	0.111666	0.238059	0.197912
	0.443694		0.562348	0.175819									2.46681	0.192653	0.0455141	1.17439			0.349887	0.702204	1.13876	0.0907273
	0.267028		0.639602	0.775473									0.349706	0.278664	0.529403	0.557469			0.395392	0.321682	0.239789	0.245289
	0.637083		1.56557	0.11875									0.116521	0.279514	0.172156	1.07308			0.143918	0.470472	0.135752	0.400684
	1.31613		0.319055	0.267839									0.284572	0.331282	0.0584818	0.114272			0.163935	0.679332	0.880169	0.0882705
	0.714431		0.267973	0.25909									0.639558	0.226106	0.0466512	0.73064			0.0564402	0.648336	0.629172	0.478254
	1.10879		0.544853	0.673227									0.175764	0.175504	0.232063	0.523806			0.0835285	0.369025	0.0590748	0.288719
	0.523503		0.303229	0.395078									0.421626	0.21546	0.323666	1.12757			0.741444	0.653767	0.336949	0.584322
	0.522719		0.215664	1.57073									0.679787	0.141999	0.238964	0.458943			0.25375	0.333234	0.230686	1.12801
	0.751278		0.515852	0.233525									0.475885	0.276998	0.325545	0.695738			0.615056	0.287749	0.349503	0.303276
	0.505699		1.24589	0.581282									1.51809	0.363386	0.598492	0.34354			0.13854	0.354961	0.289065	0.371399
	0.391359		0.0584107	0.416925									0.465327	0.101521	0.370762	0.625625			0.227084	0.461157	1.64792	0.209019
	0.331287		0.150673	0.147757									0.596945	0.316796	0.37177	0.977182			1.31205	0.875999	0.0708442	1.54929
	0.658443		0.304155	0.429153									0.644092	0.201189	0.317529	0.204016			1.49954	0.407772	0.644086	0.824539
	0.274208		0.208586	0.410946									0.145018	0.227851	0.917693	0.671458			1.54527	0.254727	1.20095	0.33995
	0.232364		0.260548	0.734197									0.976864	0.245704	0.172944	1.20843			0.260032	0.306156	0.268436	0.223667
	0.481575		0.837434	0.139665									1.06263	0.284751	0.135181	0.474823			0.246486	0.493168	0.567101	1.15342
	0.288546		0.198863	1.26347									0.291478	0.303631	0.139301	1.14591			0.185526	0.432069	0.118166	0.673926
	0.276375		0.114801	0.152928									0.110497	1.21547	0.443651	0.181364			0.757792	0.414941	0.151256	0.177404
	0.463363		0.652033	0.843904									0.802277	0.239367	0.470941	0.184092			0.221601	0.676979	0.525216	0.407503
	0.235376		1.5701	1.05296									0.385013	0.671481	0.933184	0.417616			0.166799		0.583166	0.28186
	0.180155		0.272168	0.276076									0.165919	0.930889	0.414595	0.346035			0.691272		0.425254	0.28702
	0.0870144		0.648881	0.112379									0.150801	0.5581	0.505256	0.352292			0.206366		0.765647	0.353215
	0.14885		0.250568	0.518123									0.336379	0.15138	0.380998	1.00792			0.548439		1.12078	0.335208
	0.093306		0.358977	1.16883									0.302916	0.618817	0.192809	0.0594801			0.133734		0.378136	0.211208
	0.435287		0.179441	1.06622									0.833876	0.160467	0.684225	1.03287			0.11603		0.207324	0.28568
	0.518647		0.0977473	0.123732									0.406282	0.149802	0.326622	0.420619			0.22666		0.771831	0.983778
	0.908096		0.147065	1.3489									0.422461	0.249131	0.571197	0.392067			0.0829335		0.40449	0.771385
	0.274673		0.288577	0.691657									0.171447	0.158413	0.0924577	0.609947			0.45866		0.231515	0.227708
	0.237593		0.384389	0.248937									0.124708	0.153688	0.0320723	1.09164			0.294439		0.636702	0.20408
	0.580482		0.97612	0.265221									0.213191	0.213612	0.0971597	1.05238			0.284671		0.386715	0.578689
	0.567599		0.498391	0.455589									0.250472	0.0734737	0.207582	0.364296			1.24831		0.185631	0.1217
	0.331703		0.340215	0.524089									0.303088	0.0768129	0.148694	0.553396			0.163744		0.533245	0.0671992
	0.314604		1.18181	0.502297									0.268181	0.196485	0.204579	0.285479			0.249672		0.393304	0.560692
	1.89436		0.901185	0.547688									0.516007	0.309118	0.149118	0.421519			0.0730501		0.715103	0.120962
	0.841603		0.160468	0.209304									0.191034	0.310163	0.542664	1.0575			0.256938		0.644558	0.569163
	0.290321		0.0507271	0.692914									0.363867	0.244594	0.323436	1.35826			0.14719		0.0637162	0.828199
	0.164016		0.0540834	1.05636									0.521712	0.112582	0.586835	0.441511			0.31469		0.216496	0.82798
	0.351362		0.456848	0.316627									0.389506	0.298361	0.554742	0.37061			0.155623		0.503412	0.488885
	0.160105		0.0862185	0.491314									0.516392	0.313777	0.220656	0.354297			0.819544		0.19107	0.841977
	0.42716		0.376168	0.129489									0.488662	0.211914	0.912068	1.07279			1.45648		0.0529466	0.246212
	0.269908		0.210148	0.896648									0.23688	0.143097	0.30132	0.79315			0.121971		0.562514	0.339936
	0.288283		0.445434	0.54112									1.09962	0.268288	0.197453	0.471883			0.604076		0.373888	0.78875
	0.0891231		2.17406	0.159293									0.23508	0.610719	0.794484	0.115647			1.4898		0.360265	0.226772
	0.0852538		0.860669	0.460005									0.155928	0.348687	0.0709458	0.369162			1.00322		0.319577	0.579091
	0.0831232		0.193882	0.329412									0.402148	0.144558	0.420851	0.61747			0.207586		0.221845	0.276636
	0.0972297		1.77937	0.698186									0.334418	0.622511	0.312893	1.80225			0.210375		0.789291	0.185673
	0.210348		0.386913	0.293539									0.232045	0.471705	0.0884756	0.358262			0.284748		0.660207	0.261982
	0.320329		0.824815	0.545681									0.896415	0.284636	0.593834	0.784829			0.338658		0.145015	0.424755
	0.528013		0.618711	0.444864									0.476694	0.277931	0.654686	0.554243			0.437184		0.303092	0.588193
	0.13814		0.920067	0.0403866									0.631467	0.175731	0.859527	1.64869			0.19964		0.657516	0.940105
	0.52203		0.582826	0.161895									0.387704	0.0725466	0.137819	0.457163			0.120021		0.555891	0.147638
	0.201569		0.323528	0.3002									0.104619	0.0596449	0.107858	0.314685			0.29988		0.373169	0.837418
	1.83377		0.636046	1.36166									0.311388	0.0463074	0.31518	0.990758			0.506861		0.58489	0.210224
	0.101037		0.155676	0.447913									0.188618	0.0640426	0.129921	1.22734			0.262553		0.892991	0.513875
	0.499438		1.86506	2.22738									0.607606	0.0309313	0.08087	0.207263			0.404097		0.304494	1.11712
	0.536748		0.913305	0.52285									0.183177	0.301536	0.159515	0.26281			0.771284		0.188213	2.05115
	0.682039		0.912826	1.11907									1.21149	0.152996	0.0827292	0.110365			0.164774		0.770938	0.127349
	0.592615		0.793408	0.169396									0.793713	0.161433	0.194735	0.0612927			1.22291		0.246276	0.945747
	0.273476		0.839873	1.47915									1.10164	0.315195	0.205556	1.68543			0.387799		0.507405	0.247306
	0.269194		0.436858	2.11219									0.630788	0.206237	0.443099	0.452849					0.0239235	0.0549251
	0.374802		0.763805	0.493394									1.14298	0.223546	1.33851	1.41504					0.128823	0.157936
	0.11299		0.0744036	0.44797									0.54205	0.0409877	0.0726852	0.636279					0.0271373	1.05566
	0.485796		0.1266	0.171219									0.204134	0.670731	0.13192	0.597483					0.0102717	0.55138
	0.338566		0.126703										0.649212	0.145007	3.14479	0.55329					0.412316	0.13089
	0.041481		0.349387										0.15583	0.128968	0.0681875	0.707444					0.12839	0.485371
	0.434133		0.281278										0.621363	0.116842	0.909568	0.819638					0.385457	0.0706711
	0.632694		0.46818										0.172311	0.490406	0.144804	0.50017					0.217096
	0.442366		0.0681794										0.103925	0.146162	0.303536	0.626888					0.318748
	0.43296		0.998866										0.187372	0.101678	0.102487	0.838774					0.112974
	0.446866		1.19391										0.0687741	0.265264	0.437026	0.935553					0.184679
	0.711886		0.390716										0.411937	0.457532	0.274917	0.642772					0.0324539
	0.324093		0.17529										0.0590889	0.176212	0.180161	0.951677					0.0256565
	0.222618		0.661302										0.200921	0.784235	0.538856	0.281252					0.0204394
	0.592426		0.644417										0.0380384	0.159222	0.16104	0.127164					0.022049
	0.514534		0.819675										0.0877191	0.0492007	0.122546	0.185435					0.0104186
	0.314162		0.6816										0.243241	0.155488	0.677096	1.28558					0.0463031
	0.130347		0.314069										0.186761	0.21902	0.186355	1.14423					0.839528
	0.56293		0.314064										0.127745	0.213138	1.13184	0.245181					0.0377859
	0.159924		0.0679383										0.0904765	0.50748	0.341334	1.03607					0.323211
	0.3478		1.01241										0.153999	0.374348	1.22764	0.230538					0.0520373
	0.464712		0.701242										0.427454	0.0903061	0.158406	0.617436					0.470318
	0.285743		0.453123										0.543835	0.124121	2.1357	0.588543					0.852345
	1.24408		0.991706										0.323099	0.134823	0.275608	0.66777					0.0151718
	0.177487		0.318216										0.310803	0.220823	0.326668	0.15709					0.5958
	0.149824		0.531013										0.367112	0.274771	0.268987	1.46552					0.244937
	0.570194		0.673949										0.303265	0.605936	1.40209	0.99507					0.220329
	0.418259		0.289019										0.410797	0.298136	0.714422	0.221496					0.0953169
	0.43274		0.4413										0.605757	0.43009	0.626622	0.599209					0.104303
	0.831212		1.62887										0.836096	0.3361	0.17788	1.11435					0.274784
	1.16273		0.459709										0.188199	0.18602	0.229993	0.181591					0.414087
	0.413694		0.115906										0.193182	0.32927	0.57537	0.637507					0.255998
	0.552631		0.193935										0.0983797	0.319245	0.321937	0.443035					0.635261
	0.362397		0.699922										0.068358	0.296713	0.343421	2.36349					0.174279
	0.328381		0.74394										0.774419	0.0901284	0.07201	0.258661					0.0344894
	0.959184		0.0357133										0.118727	0.0421097	0.567204	0.843394					0.208944
	0.387598		1.58158										0.203829	0.336021	0.0847481	0.287095					0.479246
	0.192859												0.488919	0.50166	0.488137	0.541675					0.171218
	0.822335												0.793388	0.471071	0.196445	0.21318					0.522876
	0.584421												0.408605	0.760074	0.3951	0.986103					0.355938
	0.119564												0.0743951	0.274514	0.238753	0.257908					0.611047
	0.267609												0.259258	0.576621	0.418419	0.358851					0.365021
	0.408589												0.0643629	0.177775	0.295062	2.53391					0.317917
	0.54676												0.196216	0.224762	0.189578	0.05111					0.402608
	0.0939327												0.553608	0.305065	0.486808	0.260468					0.822758
	1.12249												0.301768	0.504881	0.225498	0.212022					0.407628
	0.44694												0.072566	0.383007	0.326379	0.138548					0.276984
	0.433396												0.613455	0.0277155	0.0864817	0.159834					1.01319
	0.653694												0.521076	0.206104	0.647835	0.179152					0.116002
	0.31306												0.541672	0.109539	1.8594	0.531326					0.0844584
	2.6602												0.274674	0.16454	0.13591	0.10231					0.528651
	0.423372												0.125319	2.0204	0.163407	0.0732283					0.304295
	0.530259												0.134935	0.732877	0.306174	0.182498					0.628648
	0.793931												0.153505	0.240537	0.40121	0.155423					0.0558275
	1.055												0.173393	0.972735	0.2752	0.0123252					0.182935
	0.805312												0.172138	0.446732	0.649515	0.133407					0.347176
	0.458074												0.088759	0.174989	0.145576	0.368708					0.547477
	0.481747												0.437158	0.87846	0.415714	0.424291					0.0346631
	0.350754												0.177921	0.0911323	1.27737	0.25815					1.38418
	0.152563												0.678882	0.424061	0.245729	0.916507					1.00428
	0.12522												0.181926	0.056852	0.213701	0.349054					0.567425
	1.38494												0.361059	0.309211	0.17349	0.435682					0.011279
	0.605155												0.279857	0.74528	0.300339	0.322095					0.143169
	0.235609												0.325922	0.283737	0.227166	0.2469					0.435674
	0.233023												0.0676291	1.15978	0.574069	0.814439					0.201393
	0.474387												0.429999	0.264475	0.203128	0.374886					0.253423
	0.399406												0.19852	1.07115	0.225301	0.737526					0.113856
	0.390555												0.185092	0.526337	0.0817579	0.248062					0.614189
	0.344289												0.0858192	0.257534	0.343472	0.787235					0.138228
	0.359789												0.0928224	1.11777	0.338794	0.15697					1.06842
	0.233654												0.392615	0.840438	0.517648	1.04927					0.214264
	0.255232												0.479673	2.77912	0.50936	0.146638					0.275549
	0.713546												0.511895	0.0687875	0.218581	0.471981					0.639733
	0.208455												0.237856	0.164739	0.0681924	0.264745					0.252022
	0.694173												1.06183	0.479132	0.0650114	0.170024					0.175828
	0.226302												0.194825	0.0827494	0.0900052	1.3583					0.482368
	0.754525												1.02419	0.411462	0.182768	0.317939					0.461331
	0.580048												1.12439	1.59024	0.0270977	0.672908					0.168697
	0.327664												0.193933	0.235775	1.46487	0.439879					0.362111
	0.440437												0.535991	0.196284	0.199567	1.35164					0.052583
	0.679305												0.445532	0.410794	0.0840791	0.235738					0.239063
	0.194704												0.500895	1.47493	0.413904	1.17483					0.791642
	0.485748												0.22051	0.703841	0.536625	0.433488					0.385025
	0.348647												0.522493	0.583124	0.414072	0.161903					0.108232
	0.268212												0.283703	0.298862	0.401737	0.843278					0.314169
	0.363994												0.728534	0.307765	0.0803581	0.312268					0.632708
	0.782327												0.439555	1.68078	0.755527	1.42246					0.170279
	0.359535												0.431524	0.496955	0.069102	0.493243					0.159745
	0.152693												0.70382	0.19891	0.448153	0.0778361					0.477055
	0.822468												1.20611	0.264962	0.374194	0.0705953					0.232753
	0.488526												0.618929	0.497149	0.440557	1.30154					0.268756
	0.065146												0.579342	0.148504	1.32763	0.912159					0.365738
	1.26168												0.0570248	0.473471	0.361385	0.191686					0.695935
	0.276294												2.12808	0.476714	0.510243	0.707664					0.985011
	0.989602												0.201523	0.120146	0.549992	0.32842					0.213361
	0.616308												0.383392	0.21461	0.161184	0.983656					0.364932
	1.4016												0.907554	0.0373485	0.421839	0.994376					0.392874
	0.522977												0.463655	0.242144	0.0398358	0.375433					1.06688
	0.335632												0.413091	0.186174	0.530075	0.567094					0.501868
	3.29292												0.38363	0.236055	0.394844	0.327633					0.670262
	0.868628												0.542054	0.563824	0.487889	0.192058					0.101124
	0.12986												0.390939	0.255477	0.348838	2.33331					0.598818
	1.16019												0.201876	0.393964	0.0468196	0.676524					0.382871
	0.34943												0.821602	0.286159	0.239787	1.0158					0.440428
	0.640576												0.162685	0.444606	0.310468	0.294845					0.182175
	0.471843												0.376995	0.407898	0.20167	0.191566					0.620257
	0.989067												0.236964	0.161342	0.964955	0.649375					1.37971
	1.06553												0.140596	0.144928	0.350586	0.976032					0.051036
	0.712142												0.772049	1.53388	1.13553	0.170968					0.247013
	0.107295												1.02588	0.227248	0.109115	0.567381					0.483436
	1.11489												0.175143	0.488384	0.587204	0.289376					0.193247
	0.311561												0.12469	0.0856706	0.157669	0.362679					0.258043
	2.22443												0.192421	0.429738	0.367463	0.338995					0.391078
	0.907518												0.563094	0.599378	0.592506	0.195052					0.3901
	0.933357												0.543312	0.201286	0.0305398	0.357502					0.245643
	0.814309												0.244016	1.19039	0.854086	0.27547					0.605081
	0.423012												1.00003	0.294748	0.359526	0.537861					0.328402
	0.548991												0.444829	0.362348	0.148868	2.12813					0.143336
	0.489642												0.324871	0.345088	0.372345	0.269811					0.551055
	0.495585												0.230628	0.700517	0.538951	0.462224					0.107007
	0.504437												0.383442	1.39821	0.246121	0.101835					0.637691
	0.154756												0.116035	0.365187	0.393759	0.87023					0.436349
	0.17591												0.101838	0.179646	0.471136	0.16621					0.324817
	0.195422												0.370742	0.459856	0.0613261	0.197326					0.205015
	0.634342												0.123876	0.631323	0.146472	0.407845					0.462372
	0.0745752												0.183947	0.899248	0.286749	0.581079					0.362754
	0.0743521												1.50238	0.527618	0.120082	0.284012					0.259243
	0.236167												0.312152	0.102141	0.502391	1.02055					0.289849
	0.820503												0.0963293	0.145036	0.018199	0.227763					0.555633
	0.335047												0.204026	0.299543	0.131465	1.80419					0.627787
	0.66016												0.162697	0.114029	0.820377	1.04904					0.471839
	0.760971												0.206047	0.422245	0.174152	0.592902					0.712763
	0.903671												0.454387	0.392788	0.24494	0.645561					0.296774
	0.864645												0.108816	0.335591	0.405994	2.22639					0.144655
	1.26492												0.69113	0.280737	0.205165	0.112143					0.519588
	0.453733												0.0842578	0.481373	0.0934314	0.267843					0.315381
	0.664159												0.355537	0.751772	0.4895	0.563727					0.16375
	0.32191												0.16474	0.757274	0.343218	1.02735					0.210799
	0.78724												0.890309	1.11819	0.334805	0.222328					0.557178
	0.135567												0.281548	0.391101	0.211198	0.686479					0.563932
	0.0730627												0.431231	0.730014	0.0548965	1.11605					0.362433
	0.606594												0.209623	2.0988	0.40077	0.529182					0.309463
	0.878357												0.86219	1.44592	0.175113	0.231127					0.889666
	0.30812												0.0749314	0.426954	0.441755						0.590205
	0.224362												0.127294	0.0340084	0.356751						0.244573
	0.614188												0.0492179	0.171458	0.206482						0.0789127
	0.626033												0.222248	0.279217	0.0409716						0.247123
	0.376146												0.262553	0.198904	0.218309						0.424026
	0.0744789												0.311926	0.085987	0.783347						0.592995
	0.315313												0.170808	0.0717964	0.1761						0.806477
	0.529589												0.159877	0.308587	0.326542						0.35257
	0.288538												0.128867	0.240788	0.165379						0.456079
	0.774418												0.171903	0.484712	0.691868
	0.19029												0.58872	0.243171	0.274903
	0.155032												0.0834828	0.493997	0.361215
	0.048339												0.328784	0.348786	0.353715
	0.142722												0.510598	0.171645	0.886316
	0.150341												0.395701	0.177958	0.221054
	0.131222												0.457507	0.254076	1.10374
	0.269509												0.118366	0.530882	0.480381
	0.531393												0.0500323	0.173346	0.0452575
	0.756382												0.146619	0.130947	0.211252
	0.319867												0.599583	0.096115	0.187829
	0.139596												0.821542	0.117239	0.340558
	1.63457												0.155054	0.531229	0.246717
	0.404077												0.0904282	0.464507	0.356107
	0.638877												0.557496	0.415165	0.234008
	0.405205												0.107439	0.792574	0.680064
	0.424713												0.0861028	0.504661	0.0750245
	0.564156												0.351272	0.0910829	0.196188
	0.131518												0.235523	0.180063	0.10438
	0.537989												0.23738	0.281733	0.594173
	0.214946												1.04049	0.449527	0.984157
	0.414279												0.104384	0.0612403	0.777625
	0.389292												0.111458	0.429252	0.970384
	1.66394												0.457182	0.282958	0.0557386
	0.522346												0.522743	0.37917	0.341777
	0.146785												0.090838	0.179831	1.67044
	0.855303												0.278873	0.298024	0.681806
	0.309172												0.237095	0.510775	0.222315
	0.142502												0.431881	0.142114	0.113897
	0.19134												1.63468	0.225297	0.871932
	0.568051												0.132757	0.485744	0.116166
	0.323713												0.21636	0.636344	0.136658
	0.351544												0.373736	0.520203	0.69069
	0.565517												0.463103	0.885447	0.108155
	0.22452												0.179587	0.241395	0.194145
	0.377568												0.332296	0.625324	0.36636
	0.910613												0.498764	0.407938	0.0853278
	0.527076												0.918121	0.346829	0.0762116
	0.673904												0.153609	0.443561	1.10178
	0.416496												0.339438	0.242383	0.466506
	0.329997												0.167822	0.159706	0.116396
	0.134445												0.252024	0.215578	0.0867224
	0.490812												0.256864	0.365398	0.119015
	0.563931												0.252545	0.46111	0.0598773
	0.32046												0.461416	0.569863	0.167507
	0.0644485												0.290298	0.165793	0.35966
	0.0216801												0.118803	0.678388	0.382208
	0.338939												0.316166	0.380757	0.498325
	0.844294												0.0347125	0.0878536	0.25344
	0.816478												0.257956	0.506966	0.377881
	0.540218												0.477013	0.23707	0.599229
	0.432429												0.144699	0.192028	0.288917
	1.14358												0.0853054	0.482702	1.22752
	0.13496												0.514117	0.505041	0.153042
	0.306699												0.671644	0.468113	0.647472
	0.404004												0.299103	0.132036	0.684264
	0.227641												0.452457	0.813616	0.125161
	0.450953												0.537326	0.0519435	0.127949
	0.298618												0.572017	0.180617	0.072009
	0.218954												2.36414	0.20754	1.43958
	0.399773												0.551614	0.867718	0.0918564
	0.431347												0.503705	1.08741	0.332316
	0.324292												0.483177	0.0641124	0.300041
	0.521126												0.247351	0.414664	0.055851
	0.415718												0.157965	0.449786	0.104116
	0.200442												0.2073	0.292694	0.255004
	0.394279												0.528116	0.205633	0.150459
	0.357525												0.340446	0.523899	0.48936
	0.626364												0.0641075	0.162563	0.15179
	0.430389												0.184701	0.479619	0.146915
	0.383646												0.347923	0.325286	0.0554481
	0.305768												0.146866	0.0810392	0.28714
	0.409596												0.829221	0.897345	0.0549583
	0.756736												0.234991	0.236964	0.136602
	0.865729												0.327448	1.66	0.262542
	0.317743												1.05928	0.17896	0.467891
	1.10107												0.669953	0.453043	0.0474859
	0.688744												0.502923	0.277865	0.168357
	0.304932												0.36797	0.585866	0.429365
	0.387354												1.14097	0.2944	0.267007
	0.162428												0.307575	0.15131	0.156726
	0.884761												0.353012	0.101618	0.323348
	1.26253												0.657264	0.286951	0.177321
	0.254899												0.117428	0.221723	0.314561
	0.772155												0.299528	0.110613	0.0853196
	0.690177												0.656346	0.131738	2.01376
	0.541532												0.0420113	0.180869	0.724853
	2.95146												0.251836	0.240775	0.236733
	0.812214												0.140755	0.23217	0.425361
	2.30466												0.308388	0.0642132	0.206945
	0.694299												0.131721	0.344425	0.520519
	0.0883403												0.806882	0.184777	0.197477
	0.353817												0.462626	0.279399	0.391987
	0.7359												0.186833	0.407716	0.325795
	0.903015												0.115192	0.477014	0.157235
	0.64321												0.353649	0.393693	0.386762
	0.633639												0.262164	0.187019	0.504673
	0.350454												0.282037	0.11533	0.237675
	0.444676												0.345372	0.547343	0.157671
	0.445827												0.146206	0.167214	0.315083
	0.207568												0.301346	0.462016	0.623946
													0.105934	0.257319	0.993438
													0.167314	0.794531	0.782292
													0.470269	0.102153	1.65049
													0.723975	0.170896	0.428483
													0.814987	0.218133	0.360779
													0.691666	0.269877	0.255406
													0.526256	1.59007	0.806168
													0.109967	0.36103	0.73552
													0.851677	0.266532	0.214913
													0.0609902	0.129244	0.24942
													0.0728975	0.173141	0.913759
													0.613115	0.191983	0.152051
													0.636789	0.186597	0.208403
													0.322241	0.509424	0.394981
													0.276071	0.463998	0.910902
													1.17203	0.0430054	0.631154
													0.0977456	0.188843	0.663439
													0.385941	0.103913	0.956833
													0.623401	0.693782	0.368784
													0.15384	0.455346	0.301174
													0.103256	0.755296	0.210404
													0.429154	0.104025	0.308941
													0.134489	0.441804	0.620064
													0.179233	0.161499	0.431421
													0.9908	0.0702086	0.0429091
													0.447081	0.287653	0.101187
													0.462356	0.316555	0.537755
													0.146766	0.205845	0.242181
													0.373359	0.604718	0.416395
													0.241372	0.152366	2.1125
													0.778382	0.176739	0.813487
													0.306801	1.09722	0.256759
													0.208232	0.726656	0.187573
													0.23396	0.185764	0.61183
													0.15428	0.261311	0.20754
													0.708155	0.553768	0.871095
													0.23532	0.243533	0.414545
													0.196155	0.0880717	0.0857448
													0.499575	0.295889	0.325227
													0.31634	0.187393	0.0374015
													0.504474	0.355057	0.130895
													0.445164	0.164759	0.494189
													0.128149	0.660489	0.229035
													0.426517	0.970949	0.212281
													0.972295	0.03002	0.6759
													0.141973	0.349005	0.788362
													0.75363	0.0784627	0.762233
													0.784908	1.47666	0.49421
													0.404914	0.295137	2.73297
													0.348253	0.13551	0.413086
													0.296677	1.16397	0.331242
													0.154859	0.517189	0.184193
													0.233796	0.17752	0.485789
													1.39311	0.354954	0.46689
													0.321536	0.91795	0.229339
													0.658155	0.103393	0.164082
													0.608732	0.253109	2.0231
													0.309978	0.673593	0.531856
													0.164242	0.304359	0.579287
													0.355506	0.114491	0.806987
													0.54038	0.254387	0.24543
													0.278733	0.266183	0.202533
													0.167541	0.113491	0.628897
													0.294101	0.534914	0.353651
													0.132482	0.212769	0.545065
													1.43555	0.331238	0.419038
													0.22298	0.0531298	0.162433
													0.183745	0.642108	0.617144
													0.758703	0.100879	1.88004
													0.0396521	0.241407	1.00113
													0.199242	0.0994436	0.331616
													0.501234	0.774705	0.737563
													0.823141	0.678914	0.958976
													0.546092	0.426567	0.929553
													0.0279492	0.26438	1.91304
													0.731753	1.05798	1.84372
													0.202479	0.0701473	0.743871
													0.297454	0.340943	0.776803
													0.419566	0.479212	0.204028
													0.234159	0.161308	0.154354
													0.147611	0.225487	0.358347
													1.31409	0.0911675	0.157264
													0.100695	0.263499	0.433177
													0.654201	0.364932	0.208804
													0.757577	0.279737	0.545184
													0.894761	0.198934	0.641292
													0.420325	0.143242	0.563694
													0.312233	0.368298	0.210164
													0.0965788	0.241483	0.618191
													0.274341	0.465208	0.326707
													0.647156	0.233987	0.450173
													0.531509	0.647289	0.762444
													0.348117	0.316952	0.215526
													0.360299	0.077536	0.192716
													0.317991	0.130206	0.712788
													0.345448	0.175338	0.154019
													0.0616868	1.51898	0.407366
													0.457461	0.209855	0.469681
													0.349755	0.199211	0.218633
													0.148013	0.875512	0.374428
													0.106335	0.282685	0.439979
													0.288926	1.06432	0.54264
													0.193717	0.262014	0.456421
													0.0423941	0.293623	1.00026
													0.441496	0.459232	0.47483
													0.469246	0.402334	0.464342
													0.43292	0.239858	2.17749
													0.10598	0.97454	1.41557
													0.248217	0.520912	0.666957
													0.269666	0.705275	0.625904
													0.164744	0.266327	0.12733
													0.117482	0.254482	0.190995
													0.151373	0.240806	1.07856
													0.779707	0.148844	0.701588
													0.315691	0.189307	0.684911
													0.402512	0.171235	0.492737
													0.290137	0.0916688	1.30762
													0.460996		0.695695
													0.233717		0.677131
													0.246969		0.31036
													0.224642		0.813173
													0.311811		0.187288
													0.355835		0.58876
													0.295112		0.220169
													0.109344		0.432095
													0.407198		0.157068
													0.465977		0.250942
													0.220583		0.478766
													0.129391		0.323947
													0.157439		0.213248
													0.15554		0.471838
													0.268839		0.278556
													0.171443		1.21175
													0.272112		0.286414
													0.185954		2.83394
													0.861837		0.186015
													1.02115		0.288803
													0.525897		0.86246
													0.449255		0.514076
													0.103176		0.27789
													0.245311		0.376386
													0.0770184		1.03503
													0.155971		0.316988
													0.400414		0.404342
													1.36025		0.474673
													0.251484		0.200967
													0.584043		0.451648
													0.353664		0.208151
													0.520828		0.893637
													0.165335		0.245219
													0.444487		0.728847
													0.389247		0.824612
													0.127583		0.555543
													0.32519		0.32534
													0.178099		0.248515
													0.0891166		1.46385
													0.702102		0.47346
													0.291934		0.189264
													0.259799		0.58443
													0.192491		0.371799
													0.131881		0.224732
													0.673718		0.523831
													0.2212		0.880184
													0.0842635		0.257718
													0.469922		0.696624
													0.522709		0.843628
													0.127317		1.55273
													0.144185		0.221332
													0.195904		0.256266
													0.446947		0.54887
													0.855771		0.278984
													0.2058		0.109538
													0.441228		0.151804
													0.0972878		0.581543
													0.141135		0.268655
													0.455688		0.0668675
													0.135064		0.166495
													0.333441		0.415079
													0.196429		0.100329
													0.769638		0.195277
													0.50434		0.311073
													0.114045		0.373722
													1.01551		0.242246
													0.446447		0.106843
													0.815015		0.116479
													0.573965		0.244045
													1.20289		0.929424
													0.407699		0.218506
													1.00794		0.629938
													0.448332		0.585367
													0.312045		0.661955
													0.291444		0.0834003
													0.581505		0.482467
													0.439378		0.178747
													0.161783		0.1276
													0.987706		0.993617
													0.424502		0.123724
													0.268248		0.33091
													0.434115		0.084002
													0.233497		0.160148
													0.339997		0.158658
													0.415537		0.145239
													0.169191		0.227735
													0.390616		5.04758
													0.459352		0.0734601
													0.240581		0.17744
													0.472472		0.638353
													1.00861		0.226646
													0.30233		0.236123
													0.351572		0.904677
													0.901926		0.392653
													0.722461		0.438655
													0.0669998		0.641238
													0.201944		0.354043
													0.233817		0.110496
													1.08093		0.975028
													0.457981		0.0899657
													0.169513		0.0618271
													0.457241		0.430533
													0.365514		0.0634709
													0.42812		1.21067
													0.135821		0.823161
													0.467649		0.0911328
													0.0764793		0.329873
													0.0460961		0.218984
													0.161409		0.299467
													0.263858		0.315039
													0.0546569		0.135918
													0.170962		0.405729
													0.260242		0.106684
													1.91762		0.542343
													0.239579		0.638832
													0.239754		0.32052
													0.961935		0.497465
													0.160971		0.548852
													0.554006		0.0690238
													0.967962		0.351185
													0.272082		0.315977
													0.492872		1.51397
													0.296081		1.94376
													0.303891		0.264233
													0.335037		1.12672
													0.871467		0.147908
													0.0394122		0.680607
													0.352987		1.128
													0.333192		0.153206
													0.125088		0.42297
													0.143224		0.365411
													0.0485129		0.300941
													0.0217938		0.0684684
													0.289666		0.320912
													0.42481		0.173058
													0.322041		0.323023
													0.0387843		0.32271
													0.324067		0.828792
													0.517716		0.392542
													0.162091		0.111417
													0.627363		0.535282
													0.203916		0.412448
													0.183896		0.120314
													0.343598		0.370265
													0.514833		0.897843
													0.404956		0.679688
													0.176064		0.329473
													0.16345		0.729524
													0.319264		0.59615
													0.161249		0.357833
													0.57966		0.238002
													0.205856		0.388406
													0.152499		0.156755
													0.367853		0.434852
													0.584193		0.27054
													0.387893		0.280819
													0.563419		0.183671
													0.336905		0.342072
													0.428136		0.418577
													0.196281		0.194232
													0.196739		0.899077
													0.353664		0.113478
													0.283678		0.734672
													0.769524		1.27744
													0.106005		0.569908
													0.48733		0.65037
													0.017381		0.514699
													0.524364		0.299815
													0.331765		0.758126
													0.0136415		1.32147
													0.33		0.847445
													0.227214		0.209923
													0.523698		0.400088
													0.0114465		0.341552
													0.71544		0.0236712
													0.00919276		0.147831
													0.013774		0.155905
													0.518563		0.368703
													0.124449		0.339161
													0.00729156		0.27
													0.402119		0.848043
													0.650091		0.969513
													0.486788		0.101325
													1.1759		0.157521
													0.0527893		0.233023
													0.198382		0.188182
													0.0060648		0.364053
													0.302912		0.791889
													0.00887095		0.0546143
													0.164833		0.965252
													0.0561475		0.709271
													0.00478118		0.0374889
													0.00795876		0.395019
													0.165974		0.0584373
													0.386153		0.219851
													0.0141254		0.999455
													0.305881		0.0467779
													0.00816015		0.089288
													0.184295		0.15223
													0.285982		0.143771
													0.012558		1.04028
													0.203145		0.57377
													0.322867		0.766247
													1.46907		0.602356
													0.424771		0.0600244
													0.0849435		0.0240256
													0.22491		0.682903
													0.114353		0.761713
													0.453898		0.736263
													0.721205		0.0936606
													0.047632		0.0872999
													0.833532		1.49272
													0.40356
													0.477225
													0.625472
													1.63118
													0.500282
													0.110704
													0.594823
													0.200347
													0.687215
													0.219824
													0.590101
													1.08679
													0.458777
													0.438802
													0.647902
													0.288785
													0.401965
													1.34099
													0.756101
													0.372583
													0.591467
													1.68306
													0.249382
													0.557428
													0.131357
													0.633785
													0.428339
													0.269371
													0.257724
													0.449077
													0.396784
													0.336553
													0.330007
													0.229125
													0.372354
													0.121798
													0.558169
													0.251198
													0.728825
													0.471242
													0.393614
													0.599754
													0.504321
													0.222394
													0.267484
													0.234751
													0.237375
													0.350481
													0.249777
													0.300196
													0.291548
													1.07371
													0.0537075
													1.44163
													0.227857
													0.387845
													0.161525
													0.802069
													0.0416236
													0.176966
													0.0948141
													0.227115
													0.335525
													0.468715
													0.345475
													0.155117
													0.274553
													0.244713
													0.574763
													0.732749
													0.403212
													0.252982
													0.332299
													0.282637
													0.353422
													0.357667
													0.295949
													0.0820024
													1.15833
													0.873972
													0.945742
													1.01199
													0.298806
													0.139049
													0.807655
													0.315468
													0.233371
