# Supplementary material for: Control of nuclear size by osmotic forces in Schizosaccharomyces pombe
Source: eLife. 2022 Jul 20;11:e76075. doi: 10.7554/eLife.76075 (PMC9410708; doi:10.7554/eLife.76075)
Supplement: Figure 5—source data 4. — Related to Figure 5H. [file elife-76075-fig5-data4.xlsx]

## Sheet: Sheet1
Time	0 min	15 min	30 min	60 min
	0.9517868621749905	0.9621516489156161	1.075266817322917	1.093052311200004
	0.942502081608998	1.0438731232926075	1.0769769154411315	1.1151350364654768
	1.0562718344318849	0.9734015382864976	0.9519108577132434	1.1233259913370552
	1.0484637630301066	1.1402362511538908	1.0056467346273068	1.0418207551266896
	1.0639375970581617	1.0173938375881035	0.962480250616352	0.9903615850288612
	1.003900897793799	1.0448647083995912	1.129329854967382	1.0828551241624105
	1.0042790288295789	1.0111681480549246	1.0052358769132228	0.9983656574048174
	0.8876955424162776	0.975853989434557	1.0000556218924879	1.151628501477045
	0.9995761848698147	0.9677304317296479	1.1125383847565526	1.0288302110216287
	1.0173787662314242	1.0803936081958556	1.0338082545201837	1.0484622013049814
	0.9252875584467628	1.039663600451829	0.8437898273872168	1.0834516934337484
	1.015599886317262	1.0689443012236433	1.0901063894455547	0.9702009451837189
	1.0194998529147703	1.106179027530972	1.2251145359032034	1.2029128896664116
	1.1312916574755678	1.0475149403645128	1.143263231937797	0.8941277334994248
	1.0434670918650206	1.020202736140057	1.0933693570993617	1.107261962210936
	0.9814150642330158	0.9693382493383064	1.0946354084047203	1.0398404592963992
	0.9955091268101015	0.8660373441539773	1.0945696530611908	1.064437059207272
	1.0577971476621646	0.9601579561670437	0.9649830547962348	1.1571836600778793
	1.0163210376893415	1.0331661818709454	1.0065324690737982	1.1243597975385717
	0.9674604393452809	0.9513497703817975	0.981932793932507	0.9648270474940099
	1.1171229093147044	1.1341680329019423	1.1355038808280074	1.0897489328248324
	0.9017818840175417	1.1353820910691115	1.057098806495216	1.051219211555365
	0.96987511423441	0.9427636940053231	1.0225715795119212	1.1117603908304448
	0.8665566836089214	0.9619125073435154	1.0720167808671426	1.0634024014424102
	0.9416361259472379	0.9839699287867998	1.1465520861444978	0.962783606250577
	0.931623725924175	1.0051512065348178	1.0210980532840077	0.9941871855444829
	0.9397269234768788	0.9187039310108766	1.160796230680271	1.0778374735152543
	1.1110254366312364	0.9567723641485864	0.8558855833622006	1.0734781646605314
	0.9143050297677784	1.0037863372724312	0.9600389273999417	1.1871774446172167
	0.9581552879693305	1.1385818773961467	0.9113989775546357	1.0069571491784743
	1.1528698899478584	0.9371368892439121	0.919916998103548	1.0441554880819413
	0.934659077526274	1.1509474384339966	1.0180466435014066	0.9522855388661225
	1.1546588259203523	1.036333122802343	0.9041867147576441	1.244590500966948
	0.9181671968649481	0.9873399357438252	0.9161389329922248	0.9889953953846131
	0.9352462940085661	1.0791112815293311	0.8670646549622301	1.0797004824567988
	0.9471109348941449	1.0065590259227806	0.9270414818245933	1.0380602579290854
	0.9765699845252046	1.0279914163845374	0.9451668942129836	1.1050951302932812
	0.8983203250240506	0.9553933213378198	0.8316641268701582	1.0295763109721863
	0.890939660074459	0.9307718684985901	0.9681184394320271	1.0401416592555524
	1.0165145749217832	0.9092712743666106	0.9907782218893951	0.9814131346107521
	1.0169591410709846	0.9129253400343782	0.893610493936099	1.063891517302883
	0.988167832724778	1.0368440411495088	0.8866376415904718	1.176287943226384
	0.9410133908678289	0.9609418134630148	0.9652144187517188	1.0105580496989193
	0.9326834047052117	1.1350415872328221	0.9446700180730385	0.9991685988942827
	1.0707477774509568	0.9268206597958556	0.9211484458299287	1.1664071875942075
	0.9537630945786759	0.9464495341398721	0.8985872743048788	1.179887214749214
	1.000592328556427	1.038867590119115	0.9032136157493079	0.9921766825362895
	0.957028792990412	1.1109434638315432	1.0854077075189388	0.948081032065903
	0.974688222697007	1.0791198124492787	0.9360927947811928	1.0395673667012773
	0.925821460446058	1.003989451676515	0.9162417875436096	0.9453528779332522
	0.9519575800535128	0.9773196044153114	1.037386269928663	0.9013812433661066
	0.9491208102156589	1.2045762943666665	0.9538715861275028	0.9016799548909714
	0.9591392345389947	0.9588286431526932	1.0521528494127987	0.952498872083697
	0.9537432531866393	0.8494089075382356	1.0433500003082297	0.9846077345398537
	1.0677596615097673	0.8875692803227911	0.9256858461210941	1.2184339258546237
	0.9509047953780349	0.9199433090125686	0.9928310571305426	0.9667106454083919
	0.9596324956688481	1.018073182952687	0.9225215394112394	0.7831233209658778
	1.0624254124969694	0.9400438074813295	0.956283799516358	0.9598481168426996
	0.9821181662428545	0.9766168313049449	0.9974217558963347	0.9692186592512771
	1.1072693041954427	0.9797885174747923	0.840577421183714	1.157116811974408
	0.8963381982214262	0.8960152538079769	1.012538068128907	0.9609246221684343
	1.05269466259064	0.8835040617295717	0.8863356318533311	0.9060862707271639
	0.9287542231954581	0.9477651290000549	0.9549646671660641	0.9572477899789409
	0.9354126234852461	1.0589431216502334	0.9206365076180668	0.9319689574002806
	0.9331424160449577	0.968245621633302	0.9381758029806896	0.9958340615818642
	0.9606686677605342	1.0382646973870615	0.8932063470146079	0.9124614756962485
	1.0033918565892594	0.9512393721143986	0.9301168231187317	1.0209157944929836
	0.9026032575285247	0.9207430782789342	0.9224242406346684	0.950107871705416
	0.8873902943126264	0.9566906947681942	0.9166450377481872	0.9175945421851011
	1.2114369534540337	0.8301004356488035	0.9947243215081466	1.0123813916536784
	0.9382657338960044	0.9448235562893856	0.9794386593207075	0.9541862391568677
	0.8939264816921774	0.8632530885091868	0.8722890953793012	1.0515725833875615
	0.9869031892760181	0.9134870592318577	0.89027697118568	1.0398505347608573
	0.9987256909509271	0.9943775140180193	0.86748401021825	0.8513345815393163
	0.8988169233736808	0.9676516965957194	0.9530780722791883	0.9659072648993866
	0.9521551949052275	1.0369352411969142	0.9525861895817173	0.9402800444001229
	0.9897296666104329	0.9848989129722028	0.9487814775797555	0.9547133433434277
	1.0575693576866658	0.9548688294534096	0.8817397826408963	0.9568838747329589
	1.0116685352832466	0.8976111920818399	0.9976527970727347	0.9170857720711582
	0.9842391681225421	0.895869788259219	0.8891932878772466	0.884124824954006
	0.8598813064186861	0.8370371441086569	0.9749325626516738	1.0425366753020577
	0.9715707079058085	1.0377137771146134	0.8959560688852267	0.8932511277977166
	0.9293821194311973	0.9747523496065373	1.0732807918680511	0.9238456348751877
	0.952348066450288	0.9313237650646898	0.931938733431674	0.9338810379486218
	1.0248371243195291	1.0067062605524513	0.9962733264405796	0.8896321467053675
	0.877296017250046	0.9796450107622271	1.0558011126170406	0.9250986418352216
	1.028782080907097	0.986875609154846	0.9572618730110632	0.7852033653162019
	0.9274921859680237	1.1522144019659186	0.9606324806302362	0.9408947808620287
	0.9545126476490436	0.8746577431062508	1.0021918582001785	0.9529183456785332
	0.8441190106502008	0.9571910981189133	1.0318196298767663	0.9030654366753833
	0.7680182399298707	0.9485864865571585	0.9078225134834171	0.8747730999961727
	0.9624572538218912	0.8727468850407237	0.9145237628758522	0.9606902604411589
	0.9384142091236044	1.0164181205298948	0.90554592183006	1.1595529522698143
	0.9518945633225693	0.9077098806704742	0.98669877625086	0.9415579792228574
	0.9470687814072453	1.0254125367722342	0.9756951020088517	0.9705350091410214
	0.9015772854464366	1.0076253236154207	1.0146824067989644	0.8778054161125236
	0.845934615309406	0.8483645715219605	0.9188951496076025	0.9510408556497382
	0.9764116069403719	0.9419155079924768	1.0548413291739531	0.949062562473107
	0.987484311575164	0.991060441282665	1.0744609867888302	0.9865194362300785
	0.8969352171126512	0.92189731553655	0.9998062310700281	0.9697823742857518
	0.9455110704975136	0.9198606674989821	0.9858155545540429	0.974199018223793
	1.0150807970656164	1.0058659848389004	0.9901618564295301	0.92261428670392
	0.8127553725131357	0.9520205044336986	1.2190859051746468	0.9505218251668207
	0.9014658740259643	1.0895571976791105	1.0250429360775135	0.9512308008124754
	1.0329214482056848	0.9947289347959891	0.9028568727597683	0.8854878298703787
	1.080152941896034	0.9424155270626299	0.9595067121695564	1.0433497441857036
	0.8777547050205671	0.9276768291363623	0.9688231912965748	1.017518045709881
	0.8903282328721712	0.9701393397150746	1.0001210697344884	1.1480780508046429
	1.1452986970217818	0.9459798427867929	0.9528331829582185	0.9146977879753105
	0.9652979139210991	1.0196681497945252	0.9765919081605019	1.011280473152309
	0.9112967849615695	0.9189750960254172	0.9612965149502383	1.0550015267570592
	1.079470731465901	0.9585034284069124	0.9796442202109047	1.0638670769837613
	1.010537487973218	0.8372149136910175	1.0296394071462098	0.9735213512851347
	1.025392778900278	1.0154582404243924	0.9103689355975048	0.9272969935495536
	0.9691650941185079	0.9732805473009234	0.907062343764645	1.0144214016816642
	1.0574201468165412	0.9336071098683094	0.9498490209908417	0.9874952894671578
	0.9086810091351444	0.9423834730053444	0.9955013742952015	0.9892836433558322
	0.929976405231585	0.8664336509861394	0.9323482332682962	0.9785876844262801
	0.9191287907979999	1.0168961336535618		0.913434983312084
	0.9065230829167442	0.9111343863818052		0.9584988717919641
	0.9564809447174	0.948905690576053		0.9303827078351594
	0.9566784813884006	1.0436894062109114		0.960707206099009
	1.002469142542464	0.9209177283039582		0.9866640738803126
	0.8602586940148064	0.9473205421380241		0.9189201022590596
	0.9657590051485303	0.9717826420230219		0.9807618733068013
	0.8605948509302703	0.9589688416957017		0.9985758693368175
	0.9351427774438831	0.9774642083311131		1.020111509832046
	0.9920849784716889	1.0062588510848653		0.9470131556552457
	1.030847283399838	0.9825409988697416		0.925676756377575
	0.9450061983891063	1.0494031675404176		1.08782771745533
	0.9038182606850227	0.9669274209467734		0.9346132919082527
	0.958336347906637	1.1339206305052978		0.9637462022253998
	0.8670019256823546	0.9552380651576851		0.8824127425895425
	0.9670008758837231	1.0439551974528036		0.9438226980123378
	0.858767214215812	0.9860774959545421		0.9252748238502653
	0.9613904248411999	0.9253093205643348		1.002507044261831
	0.9849514112560448	0.9532172502778237		0.9423678308816525
	1.0754868231757657	1.1031152500884223		0.9635084172800411
	0.9396386225961463	1.051400700387368		0.920528842239518
	0.9658382431949407	0.9284485377576008		0.9025860724116349
	0.8359735606953588	1.0867525761331038		0.9475124243614498
	1.0385012003950078	1.000530536388887		1.1104922083721531
	0.9736128620541188	0.9753814964872672		0.9698337031417661
	0.924438146915684	0.9073115637453718		0.9197485528952184
		0.9231867059147655		0.9192706677967859
		1.1237633270503296		0.9348176076739315
		0.9693603507009808		0.9849173175555682
		0.962833583761344		0.9851243113771442
		1.0052533895020757		1.0887872183763108
		1.0327676704187074		1.0164832046677894
		0.994035344813761		0.9761125963962584
		1.0303573889922766		0.9658258446811264
		1.0822429408626855		1.0047103745391475
		0.9315146781824106		0.9417354254357705
		0.960489165500711		0.9967359611004195
		0.9801745512914832		0.9517955760290119
		0.9849832805362776		0.9304335797990422
		0.9830136083609414		0.8952493843681528
		1.0093488981183747		0.9674821286183414
		0.9460705807866117		0.9205183201427058
		0.9361267626955548		1.0299162199868075
		1.0180831725626158		0.9791968475991712
		0.9663859141459958		0.8910656369460652
		0.9533944013012345		0.9395064608794763
		0.908716155580087		0.9675811781844004
		1.0124697776462561		0.9864389015755428
		0.9506750669681251		0.9436197543237105
		0.974379190899474
		1.0565688486914575
		0.9885819907236817
		1.0055592054800269
