# Supplementary material for: Control of nuclear size by osmotic forces in Schizosaccharomyces pombe
Source: eLife. 2022 Jul 20;11:e76075. doi: 10.7554/eLife.76075 (PMC9410708; doi:10.7554/eLife.76075)
Supplement: Figure 5—source data 5. — Related to Figure 5I. [file elife-76075-fig5-data5.xlsx]

## Sheet: Sheet1
% Data to be plotted as a bar graph as mean value
model_series = [0.234,0.2238;0.2336,0.2012;0.254,0.2716]; %Cyto,Nucleo Mean Values by time
%Data to be plotted as the error bars
model_error = [0.057,0.046;0.037,0.041;0.094,0.0951]; % STD Cyto Nucleo by time
%Number of cells
