# Supplementary material for: Control of nuclear size by osmotic forces in Schizosaccharomyces pombe
Source: eLife. 2022 Jul 20;11:e76075. doi: 10.7554/eLife.76075 (PMC9410708; doi:10.7554/eLife.76075)
Supplement: Figure 6—figure supplement 1—source data 1. — Related to Figure 6—figure supplement 1. [file elife-76075-fig6-figsupp1-data1.xlsx]

## Sheet: Sheet1
Volume Cell	Volume Nucl	N/C ratio	Condition
155.715	11.045	7.093086728959959	Control
105.281	7.629	7.246321748463634	Control
105.729	8.107000000000001	7.6677165205383595	Control
70.218	5.202999999999999	7.409780967843002	Control
63.497	4.603	7.249161377702882	Control
102.632	7.729	7.530789617273364	Control
110.095	8.353	7.587083882101821	Control
92.411	6.955	7.5261603055913255	Control
105.30799999999999	6.736000000000001	6.3964751016067165	Control
65.314	4.98	7.6247052699268165	Control
61.283	4.958	8.09033500318196	Control
87.416	6.3229999999999995	7.2332296147158415	Control
82.83200000000001	5.867999999999999	7.084218659455281	Control
120.471	9.031	7.496409924380141	Control
105.762	8.311	7.858209943079745	Control
108.90100000000001	7.318	6.719864831360593	Control
93.59299999999999	6.789	7.253747609329758	Control
74.361	5.099	6.857089065504768	Control
116.535	8.808	7.558244304286266	Control
83.258	5.249	6.304499267337674	Control
80.778	6.261	7.750872762385798	Control
85.365	6.167000000000001	7.224272242722428	Control
87.865	6.666	7.586638593296535	Control
90.56	6.55	7.232773851590106	Control
123.125	7.965	6.469035532994924	Control
116.57	8.464	7.260873295015871	Control
145.273	8.691	5.982529444562996	Control
86.712	7.506	8.656241350678107	Control
65.215	5.381	8.251169209537682	Control
100.25200000000001	6.25	6.234289590232613	Control
71.555	5.591	7.813569981133393	Control
87.31	5.565	6.373840339021876	Control
59.461999999999996	5.112	8.597087215364436	Control
75.17399999999999	5.172000000000001	6.880038311118207	Control
73.171	5.4479999999999995	7.4455726995667675	Control
61.023	4.99	8.177244645461547	Control
121.73700000000001	10.357000000000001	8.507684598766193	Control
86.074	6.638	7.711968771057462	Control
84.682	5.807	6.857419522448691	Control
97.98	6.7620000000000005	6.901408450704226	Control
90.102	6.465	7.175201438369847	Control
74.158	5.269	7.105099921788613	Control
74.33800000000001	5.831	7.843902176544971	Control
7.5929	5.3660000000000005	7.06712850162652	Control
7.5725	5.7589999999999995	7.605150214592274	Control
120.7197	9.0189	7.470943019242096	Control
94.52712	6.75065	7.141495477699945	Control
84.68806	7.45772	8.806105606858866	Control
77.76463000000001	5.18288	6.664829498963732	Control
86.53983000000001	7.362	8.507065474937955	Control
137.53095	10.15465	7.38353803271191	Control
76.85381	5.16556	6.721280311281901	Control
94.21822	6.9604800000000004	7.387615686222898	Control
94.67935	7.153810000000001	7.555829227809443	Control
84.36277	7.066669999999999	8.37652675463359	Control
88.22351	6.84899	7.763225471305778	Control
89.96481999999999	6.4636	7.1845861526761245	Control
94.15588000000001	6.38276	6.778928729676786	Control
115.50706000000001	8.501669999999999	7.360303344228482	Control
104.18691	6.89697	6.619804733627285	Control
105.6328	7.9614	7.5368635499579675	Control
127.68887	9.24182	7.237764732352946	Control
86.97117	6.3694	7.323576306953211	Control
100.98971	7.80092	7.724470146512946	Control
74.79771	5.88755	7.8712971292837715	Control
125.62747	9.126610000000001	7.26482034542286	Control
91.78335	6.70702	7.307447374714478	Control
98.77926	7.4735	7.565859472929843	Control
123.67525	9.027560000000001	7.2994071166219605	Control
84.44899000000001	7.11988	8.430983011164491	Control
81.66844	6.181430000000001	7.5689336051968175	Control
68.34364000000001	5.33875	7.811626656116062	Control
72.57208	5.72492	7.888598480297106	Control
65.50189	5.56039	8.488900091279808	Control
78.74394000000001	6.35569	8.07133856903782	Control
92.32436	5.91029	6.401658240577027	Control
103.93994	7.16482	6.893230840810567	Control
120.54161	8.830869999999999	7.325993074092837	Control
66.09089	5.73189	8.672738406155522	Control
113.938	8.51701	7.475126823360073	Control
201.39066	12.366539999999999	6.140572755459464	Control
122.09396000000001	8.3528	6.841288463409656	Control
91.43413000000001	7.36728	8.057472630843646	Control
117.99573000000001	9.40293	7.968873110916809	Control
91.92586	5.83024	6.342328480799636	Control
81.33815	5.51363	6.778651838036641	Control
103.99344	7.41856	7.1336807398620525	Control
104.92243	8.41268	8.017999583120597	Control
85.08479	5.9168199999999995	6.954027858563204	Control
117.58608000000001	8.91493	7.581620205384855	Control
61.846669999999996	5.4207	8.76474028431927	Control
88.63298	7.04749	7.9513178954380175	Control
100.56985999999999	7.286810000000001	7.245520675876452	Control
106.28128999999998	8.24434	7.757094404857148	Control
92.65095	6.572080000000001	7.093375729013034	Control
118.90156	8.45432	7.110352462995438	Control
84.79765	6.24421	7.363659252349564	Control
97.60124	7.25241	7.430653544975454	Control
109.66613000000001	7.877210000000001	7.182901411766787	Control
72.79842	5.31093	7.295391850537417	Control
144.30771000000001	10.44575	7.238525231950531	Control
84.01049	6.6737	7.943888911968017	Control
102.81260999999999	7.26535	7.066594263096716	Control
101.0382	7.88315	7.802148098441974	Control
85.59891999999999	6.24043	7.290313943213303	Control
95.35302	6.2865400000000005	6.59291126804374	Control
86.70645999999999	6.44639	7.434728623449742	Control
71.17107	5.80564	8.157303241331064	Control
83.19366	5.6466400000000005	6.787344131752349	Control
106.80366000000001	8.08721	7.57203451642013	Control
79.09786	4.117290000000001	5.205311496417224	Control
73.52232	5.4011	7.346204526734194	Control
71.90438	5.9078599999999994	8.216272777819652	Control
73.23135	5.4721	7.47234620145607	Control
115.16467	8.648819999999999	7.509959434607852	Control
88.01901	6.23532	7.084060591001876	Control
86.69076	5.62919	6.49341406166009	Control
60.428380000000004	5.12594	8.482669897819534	Control
85.13949000000001	6.0126599999999994	7.062128279133454	Control
113.42561	8.53642	7.526007574479872	Control
93.1734	6.7976600000000005	7.295708861112721	Control
129.33244	9.99354	7.727017289707053	Control
122.62298999999999	8.023019999999999	6.542835075217135	Control
77.4359	5.68458	7.341013664204846	Control
73.70385999999999	5.59144	7.586359791739539	Control
98.98106999999999	7.363639999999999	7.439442713642114	Control
91.28787	6.7836300000000005	7.431031088796354	Control
141.03996999999998	10.29645	7.300377332751844	Control
70.04791999999999	5.018	7.163667386554804	Control
76.90259	4.92724	6.407118407845562	Control
121.54154	9.6419	7.933007924698009	Control
87.52462	6.36629	7.273713384873879	Control
74.25672	5.87052	7.905708735855825	Control
121.24277	8.50655	7.016129704064005	Control
104.89838	7.6532800000000005	7.295899135906579	Control
74.57970999999999	5.83373	7.822140901325576	Control
93.16734	7.169239999999999	7.695014154101641	Control
105.16559	6.96593	6.6237730421138705	Control
122.24985	9.27556	7.587379452817325	Control
74.20129	4.62959	6.239231150833093	Control
64.57341	4.477	6.9331943287492495	Control
86.96571	5.89729	6.781166967992328	Control
104.68544	7.38243	7.052012199595283	Control
80.32564	6.08809	7.579261117620724	Control
102.86645	7.9132	7.692692807032808	Control
83.20548000000001	6.42842	7.725957472993364	Control
88.02722	7.68716	8.732707905577389	Control
117.73131000000001	8.081339999999999	6.864223289454604	Control
63.71709	5.35712	8.407665824035593	Control
105.64232	7.94239	7.518189680044891	Control
68.20265	4.77464	7.0006663963936875	Control
114.40731000000001	10.43627	9.122030751356709	Control
120.54811000000001	7.875030000000001	6.532686410429828	Control
127.22258000000001	9.93947	7.812661871815521	Control
123.50761000000001	5.836869999999999	4.725919317846081	Control
109.09828999999999	8.81228	8.07737683147921	Control
117.35758999999999	8.07187	6.878012747194282	Control
110.85077	7.546589999999999	6.807882344885831	Control
96.51048	7.18082	7.440456207450216	Control
107.59108	8.385539999999999	7.79389889942549	Control
86.65187	6.04512	6.976329535646489	Control
70.32876	5.09889	7.250078061947914	Control
74.74323000000001	5.60576	7.500023747970216	Control
105.33107	8.13422	7.722526696064133	Control
112.888	7.57325	6.70864042236553	Control
88.34079	6.7412	7.6309030064141385	Control
89.73519	6.29219	7.01195372740616	Control
69.14693	5.37365	7.771350080184327	Control
89.49854	6.96678	7.784238714955573	Control
81.6211	6.12615	7.5055959794709945	Control
75.67641	5.24109	6.925658867803057	Control
94.60665	6.959860000000001	7.356628735929241	Control
95.45616	7.396719999999999	7.748813696255956	Control
80.19185	7.86574	9.808652624923853	Control
107.88536	8.0621	7.47283968835067	Control
103.93415	9.09857	8.754167903427316	Control
93.43936	6.91131	7.396572493647217	Control
93.85406	7.0901	7.554388163921731	Control
91.81666	7.905930000000001	8.610561525544494	Control
94.70349	7.1155100000000004	7.513461225135421	Control
109.1599	8.20513	7.516615533726213	Control
86.85056	7.00137	8.061398798119436	Control
106.65088999999999	7.86757	7.37693797023166	Control
86.40845	7.3282	8.480883524701577	Control
101.1353	8.17717	8.085376718119193	Control
118.60061	8.87805	7.485669761732254	Control
127.49343	10.10333	7.924588741553191	Control
124.46481999999999	8.935210000000001	7.178904046942744	Control
123.74956	8.64301	6.984275338029485	Control
112.58881000000001	8.60213	7.640306350160375	Control
117.91001999999999	8.15017	6.912194570062832	Control
111.35452	8.16977	7.336720592931477	Control
69.25161999999999	4.7294599999999996	6.829385363114972	Control
67.56639	4.88052	7.223295487593758	Control
94.05096999999999	7.2629	7.72230206663472	Control
87.1836	6.60888	7.580416500350983	Control
108.75153	7.22151	6.640375542302715	Control
96.59335	6.96013	7.205599557319423	Control
83.6638	6.64865	7.946865908553042	Control
98.46903	6.72594	6.830513106506684	Control
95.45201	7.29703	7.644710677124557	Control
70.62248000000001	6.18246	8.754238027325009	Control
77.84515	5.81564	7.470780132095577	Control
72.97778000000001	6.58705	9.026103561933507	Control
74.31345	5.67399	7.635212737398142	Control
85.0582	7.1212800000000005	8.372243945909979	Control
114.84248000000001	7.99523	6.961909913474526	Control
60.39186	4.75392	7.87178934379567	Control
93.06560999999999	6.6616	7.157960926705364	Control
76.86923	6.875589999999999	8.94452825922674	Control
100.51068000000001	7.03675	7.000997306952852	Control
76.99211	6.2086	8.063943175476032	Control
65.7163	5.65193	8.600499419474316	Control
87.29581999999999	5.47931	6.276715196672647	Control
84.87246	6.40739	7.549433585405678	Control
92.87311	6.63502	7.14417768501561	Control
102.81911	8.2152	7.989954396609734	Control
106.05968	7.641960000000001	7.205339484335613	Control
92.33319	7.528969999999999	8.154131791612528	Control
125.89861	9.11558	7.240413535939753	Control
135.62076000000002	8.76848	6.465440836638874	Control
86.32781	7.60522	8.809698751769563	Control
137.19578	9.63674	7.024079020506314	Control
103.68204	8.66692	8.35913336581726	Control
127.09392	8.81265	6.9339666287734305	Control
73.18043	5.607880000000001	7.663086975575302	Control
76.86232	5.6737	7.381640314786231	Control
114.75226	8.57218	7.470162243427709	Control
110.5602	8.63402	7.809338260965519	Control
102.7101	7.3505	7.156550329519687	Control
108.23791999999999	8.37678	7.739228543933588	Control
107.30498999999999	9.17423	8.549676953513533	Control
81.06399	6.33885	7.8195632857450015	Control
80.52233000000001	5.65221	7.019431752657927	Control
82.63803	5.66475	6.85489477423409	Control
75.19156	5.39521	7.175286694410915	Control
67.23035	4.9069199999999995	7.2986679379179185	Control
66.83103	4.82584	7.220957091339159	Control
100.03881	7.10498	7.102223627010358	Control
94.28697	6.15207	6.524835828322832	Control
93.66395	6.43916	6.874747434845531	Control
111.74978	7.2906699999999995	6.5241023293289695	Control
109.88963000000001	6.25584	5.69283926062905	Control
93.15385	6.3756900000000005	6.84425818149223	Control
83.80185999999999	5.47724	6.535940849045595	Control
72.34974	4.67464	6.461170420239244	Control
92.78868	6.25523	6.741371900106781	Control
78.79527	6.05301	7.681945883299847	Control
92.95285	7.613239999999999	8.190432030862958	Control
95.74588	6.222980000000001	6.4994754865692395	Control
84.48323	5.9741800000000005	7.071438911604114	Control
84.03605999999999	6.34126	7.545879709258145	Control
91.92007	6.583939999999999	7.1626794888211025	Control
83.23044	6.494219999999999	7.802698147456627	Control
117.86408	8.373439999999999	7.104318805186447	Control
64.12708	4.5803	7.142536351257533	Control
136.1273	10.011619999999999	7.354601171109689	Control
85.20414	5.78603	6.790785048707727	Control
73.64996	6.2081599999999995	8.429278169329624	Control
98.59148	6.94026	7.0394115191292395	Control
110.92981999999999	7.104260000000001	6.40428335681064	Control
101.88606	7.90522	7.758882814783494	Control
97.46165	7.474660000000001	7.669334553642382	Control
95.80733000000001	7.696439999999999	8.033247560494587	Control
93.80577	6.662160000000001	7.102079115175966	Control
108.75873	8.4279	7.749171032063357	Control
105.27318999999999	7.290360000000001	6.925181995529918	Control
107.26151999999999	7.68008	7.160144663249225	Control
92.28405	6.26196	6.78552794334449	Control
72.06959	4.8701300000000005	6.75753809616511	Control
86.38243	6.48684	7.509443760727732	Control
108.26856000000001	8.06443	7.448542771788966	Control
79.70805	5.2753	6.618277576731585	Control
105.72606	8.020010000000001	7.585651068431	Control
105.72593	7.82066	7.397106840299253	Control
86.64312	5.77152	6.6612559658516455	Control
90.15514	6.282019999999999	6.968010919843283	Control
93.90473	6.337269999999999	6.74861639024999	Control
119.74416000000001	7.727239999999999	6.453124728588016	Control
106.17811999999999	7.1559	6.739524112877493	Control
97.82767	7.29027	7.45215540756516	Control
69.52965999999999	3.93705	5.6624036418414825	Control
74.74672	6.2205900000000005	8.322224707652724	Control
83.72785999999999	6.49929	7.762398322374417	Control
65.6593	4.50301	6.858145000022844	Control
82.50108	7.58962	9.199418965182032	Control
75.45495	5.60144	7.423555379733206	Control
100.84985999999999	7.9398100000000005	7.872901360497675	Control
70.0773	6.5756	9.38335238372483	Control
90.21621999999999	7.72847	8.566608088878032	Control
103.63651	7.805289999999999	7.5314095389742475	Control
99.14066	7.10385	7.1654253663431335	Control
76.61169	5.244330000000001	6.845339138191575	Control
62.758280000000006	4.15917	6.627284877788236	Control
82.95713	6.4841	7.816205792075978	Control
76.20591999999999	4.8270599999999995	6.334232301112565	Control
71.60525	4.88417	6.820966339758608	Control
115.45418000000001	8.44854	7.317656233840991	Control
74.11927	6.16054	8.311657683622627	Control
76.77542	5.74887	7.487904331881219	Control
80.41627	6.05344	7.527630913495491	Control
110.96431000000001	8.76859	7.90217142791227	Control
124.27533999999999	9.34516	7.519721933571054	Control
115.52685	8.44792	7.312516527543164	Control
73.53673	5.83328	7.932471296996753	Control
64.37732	5.01671	7.792666734185269	Control
106.444	9.27	8.708804629664424	30 min
75.861	5.309	6.998325885501114	30 min
69.28399999999999	5.521	7.96865077074072	30 min
69.57	5.617999999999999	8.075319821762255	30 min
72.572	5.801	7.993440996527585	30 min
105.78	6.879	6.503119682359613	30 min
104.844	7.29	6.953187592995308	30 min
106.34299999999999	6.837000000000001	6.429196091891335	30 min
97.04899999999999	6.07	6.2545724324825605	30 min
76.128	6.132000000000001	8.05485498108449	30 min
78.47800000000001	6.2860000000000005	8.00988812151176	30 min
70.232	5.492000000000001	7.819797243421803	30 min
83.226	5.37	6.452310576021916	30 min
127.73700000000001	9.8	7.672013590424075	30 min
92.64	5.681	6.1323402417962	30 min
94.985	6.371	6.707374848660315	30 min
84.348	6.147	7.287665386256936	30 min
162.618	10.76	6.616733694916922	30 min
95.167	5.79	6.084041737156787	30 min
70.368	5.372000000000001	7.634151887221466	30 min
68.187	5.135	7.530760995497674	30 min
80.111	5.997000000000001	7.485863364581643	30 min
89.807	6.377000000000001	7.100782789760264	30 min
80.973	6.2	7.656873278747237	30 min
108.98700000000001	8.612	7.901859854845073	30 min
117.986	8.04	6.814367806349905	30 min
67.55	5.472	8.100666173205035	30 min
64.90100000000001	5.0280000000000005	7.747184172817059	30 min
68.385	4.73	6.916721503253638	30 min
65.993	4.9830000000000005	7.550800842513601	30 min
91.90899999999999	6.487	7.058068306694667	30 min
106.854	7.718999999999999	7.2238755685327645	30 min
71.795	6.419	8.94073403440351	30 min
81.536	6.231	7.6420231554160125	30 min
100.167	7.354	7.34173929537672	30 min
117.098	8.254	7.048796734359255	30 min
75.69	6.067	8.015589906196327	30 min
80.176	5.9510000000000005	7.422420674516066	30 min
99.12200000000001	6.672999999999999	6.73210790742721	30 min
74.32	5.396	7.2604951560818085	30 min
86.75399999999999	6.151	7.090162989602786	30 min
60.783	4.335	7.13192833522531	30 min
62.12	5.224	8.40952994204765	30 min
63.983000000000004	4.6419999999999995	7.25505212322023	30 min
64.408	5.222	8.107688485902372	30 min
107.925	6.4639999999999995	5.989344452165855	30 min
92.58200000000001	6.001	6.481821520381932	30 min
86.556	6.856	7.920883589814687	30 min
85.045	6.54	7.690046445999177	30 min
123.569	8.66	7.008230219553448	30 min
94.824	6.046	6.376022947776934	30 min
89.545	6.595	7.365012005137081	30 min
83.605	6.931	8.29017403265355	30 min
106.6	7.412000000000001	6.953095684803003	30 min
94.272	6.814	7.228021045485404	30 min
130.578	9.503	7.27764248188822	30 min
81.235	5.473	6.737243798855173	30 min
72.605	5.11	7.038082776668274	30 min
139.276	8.138	5.843074183635371	30 min
103.125	7.689	7456	30 min
71.33800000000001	5.928999999999999	8.311138523647983	30 min
88.806	6.192	6.972501857982569	30 min
163.72299999999998	8.115	4.956542452801378	30 min
93.774	7.52	8.01928039755156	30 min
74.202	6.636	8.943155171019649	30 min
88.509	6.682	7.549514738614152	30 min
87.389	5.537999999999999	6.33718202519768	30 min
69.567	5.319	7.645866574669025	30 min
113.795	8.861	7.786809613779165	30 min
73.975	5.456	7.3754646840148705	30 min
82.53399999999999	5.705	6.912302808539511	30 min
101.712	8.272	8.13276702847255	30 min
78.176	5.681	7.266936144085141	30 min
70.367	5.376	7.639944860517003	30 min
71.311	5.151	7.223289534573908	30 min
97.62200000000001	6.671	6.833500645346335	30 min
127.52	8.527000000000001	6.686794228356336	30 min
72.19800000000001	5.245	7.264744175738939	30 min
73.509	5.522	7.512005332680352	30 min
62.232	4.731	7.602198225993058	30 min
65.957	5.162999999999999	7.827827220765044	30 min
92.47200000000001	6.757000000000001	7.307076736741933	30 min
83.45299999999999	7.196000000000001	8.622817633877753	30 min
64.858	5.822	8.976533349779519	30 min
99.27600000000001	7.452999999999999	7.507353237439057	30 min
94.794	7.042000000000001	7.428740215625462	30 min
73.622	5.47	7.429844340007062	30 min
82.76799999999999	5.447	6.5810458148076565	30 min
81.658	6.275	7.684488966176002	30 min
60.449	5.18	8.569207100200169	30 min
68.12	4.736000000000001	6.952436876100999	30 min
56.25899999999999	4.862	8.642172807906292	30 min
61.726000000000006	5.195	8.416226549590125	30 min
85.845	5.568	6.486108684256509	30 min
153.51311	9.43067	6.143234281423911	30 min
117.25013999999999	7.363569999999999	6.280222778412034	30 min
135.99646	8.835280000000001	6.496698517005515	30 min
105.167	7.41143	7.047296205083343	30 min
118.50112	8.44951	7.1303207935924995	30 min
87.14197	5.41084	6.209223867672489	30 min
119.86198999999999	8.48729	7.080885274806467	30 min
99.57226999999999	7.156860000000001	7.187603536607131	30 min
106.96531999999999	7.6642	7.165126042721138	30 min
98.45455	6.72015	6.825636803987221	30 min
84.66148000000001	4.7862	5.6533384486073235	30 min
117.29749	7.87865	6.716810393811497	30 min
78.73883000000001	5.45861	6.932551575887018	30 min
73.57509	5.385759999999999	7.320086186778703	30 min
92.20931999999999	6.7704699999999995	7.3425007363680805	30 min
136.02915	9.66132	7.102389451084566	30 min
103.6227	7.6107	7.344626225720812	30 min
95.89305999999999	7.210039999999999	7.518834001125837	30 min
98.35710999999999	6.690689999999999	6.802446716866732	30 min
75.06173000000001	5.85406	7.7989942411399245	30 min
140.89387	10.303239999999999	7.312766694533977	30 min
82.21677	6.14407	7.4730131091260334	30 min
113.80147	8.5049	7.473453550292453	30 min
101.74938	7.408739999999999	7.281361321317141	30 min
93.11273	8.1409	8.743058011509275	30 min
115.98203000000001	7.318569999999999	6.310089588878552	30 min
94.13154	6.47067	6.874072176020918	30 min
104.5936	6.838419999999999	6.5380864603570386	30 min
126.17288	9.16095	7.260633188368212	30 min
100.71415	8.23933	8.180906059376959	30 min
97.4104	6.981610000000001	7.167212125194025	30 min
89.66019	6.07224	6.7725040511290455	30 min
83.47768	5.9235	7.095908750698389	30 min
96.60203	7.11468	7.364938397257283	30 min
98.70269	7.744	7.845784142255899	30 min
98.87186	7.1734	7.2552493702454885	30 min
126.15713999999998	7.78662	6.172159578126138	30 min
108.03008999999999	7.845269999999999	7.262115582797349	30 min
74.02689000000001	5.47277	7.392948697426029	30 min
111.50183999999999	9.001330000000001	8.072808484595413	30 min
110.48078999999998	7.95229	7.197893860100023	30 min
77.26548000000001	6.22133	8.051888113553424	30 min
120.71118	8.07093	6.686149534782114	30 min
96.99308	7.62558	7.861983555940279	30 min
102.18849	7.52327	7.362150081677496	30 min
86.8814	5.33079	6.135709139125291	30 min
102.51136	6.83795	6.670431452670221	30 min
115.02396	9.17994	7.980893719882362	30 min
108.9985	8.114989999999999	7.4450474089092955	30 min
71.44802	5.453119999999999	7.6322898801114425	30 min
102.51994	7.715089999999999	7.525453097221867	30 min
94.03661	7.119260000000001	7.570732292455035	30 min
73.41415	5.8632599999999995	7.986553001022282	30 min
76.76848000000001	5.61423	7.31319677034116	30 min
91.71558	7.266089999999999	7.9224162350606075	30 min
78.67719	5.8337	7.414728461959561	30 min
86.3078	5.427169999999999	6.288157037950219	30 min
72.99684	5.58132	7.645974812060357	30 min
107.23566000000001	7.81977	7.292135843617692	30 min
84.1062	6.3714	7.57542250155161	30 min
79.23442	5.80671	7.328519600446372	30 min
84.27481	6.4687	7.675721843810742	30 min
77.22497	6.866039999999999	8.890958455535818	30 min
107.41745	7.6833	7.152748459398356	30 min
92.72661	7.607819999999999	8.204570403253177	30 min
100.90678	7.96577	7.894187090302554	30 min
114.2915	6.965839999999999	6.094801450676559	30 min
81.32176	5.90856	7.265656818052142	30 min
117.65961999999999	8.13223	6.911657542324207	30 min
102.06434	6.8284899999999995	6.690377853812604	30 min
112.72612	8.93604	7.92721332021363	30 min
103.9606	7.06791	6.798642947424313	30 min
74.92707	5.49052	7.327818904436007	30 min
89.89112	6.34291	7.056214228947197	30 min
126.05458999999999	8.41945	6.679209380634216	30 min
76.44006999999999	5.7438400000000005	7.514174175926319	30 min
74.11449	5.1403099999999995	6.935634313883829	30 min
74.15295	5.05355	6.8150356796324365	30 min
90.90196	6.4343900000000005	7.078384228458881	30 min
83.54374	5.55374	6.647703346773798	30 min
72.63727	5.48006	7.544419001429982	30 min
125.96822	8.61598	6.839804515773899	30 min
111.44797	8.262369999999999	7.413656794287054	30 min
113.65801	7.664789999999999	6.743730600245419	30 min
86.00035	6.48559	7.541353029377207	30 min
65.11492	4.76031	7.31062865469235	30 min
63.81266	4.79861	7.519840106963101	30 min
67.2467	5.36512	7.978265104458656	30 min
62.05086	3.70561	5.971891445179003	30 min
85.7908	6.04099	7.041535922266723	30 min
104.79369	7.750039999999999	7.395521619670038	30 min
99.32151	7.3316300000000005	7.381714192625545	30 min
88.38181	7.1509	8.090918255690848	30 min
99.39523	7.9399	7.98821029942785	30 min
85.16994	6.1582	7.230485309723125	30 min
71.24987	5.1090599999999995	7.170623609558866	30 min
95.99542	5.6721699999999995	5.908792315300042	30 min
96.18285	7.41033	7.704419238980753	30 min
105.49558	6.826910000000001	6.471275858192353	30 min
102.51507	7.44947	7.266707226557033	30 min
91.85994000000001	6.4163	6.9848728401085385	30 min
84.7272	5.65224	6.671104438716256	30 min
82.76227	6.26156	7.565718050024486	30 min
126.37375	7.2529	5.739245689868347	30 min
82.42099	5.91599	7.177771099327974	30 min
113.98787	9.74929	8.552918832503845	30 min
79.83714	6.86389	8.59736458495382	30 min
80.66373	5.67668	7.037462810113046	30 min
85.19896999999999	6.561789999999999	7.701724563102112	30 min
74.73989	4.82621	6.457341588273678	30 min
126.63633999999999	9.64838	7.618966246181784	30 min
58.637840000000004	4.71235	8.036363549544117	30 min
72.96864000000001	4.98733	6.83489510014165	30 min
101.17215999999999	6.22575	6.1536197309615615	30 min
97.96805	6.3947199999999995	6.5273525399352135	30 min
99.91169000000001	7.76899	7.775856859192352	30 min
102.47861	6.82302	6.657994287783567	30 min
93.8209	7.8270100000000005	8.34250151085739	30 min
84.41226999999999	5.8978	6.986898942535251	30 min
76.16711	5.72469	7.515960629200714	30 min
86.53468000000001	7.284660000000001	8.418197189843424	30 min
93.31251999999999	6.96512	7.464293108791832	30 min
75.73946	5.52991	7.301227127840628	30 min
76.51964	5.33014	6.965714945862265	30 min
66.0356	5.34395	8.09252887836258	30 min
69.08954	4.7613199999999996	6.891520771451076	30 min
117.17716000000001	7.95649	6.7901372588309865	30 min
95.737	7.27388	7.597773065794835	30 min
93.56249	7.11153	7.600834479715108	30 min
131.63058	8.68571	6.598550276083262	30 min
95.38967	7.05313	7.3940186605111435	30 min
96.5054	6.828119999999999	7.075376092944022	30 min
96.59137	7.823110000000001	8.099181117319281	30 min
83.07897	5.39417	6.4928224314769425	30 min
98.78655	7.337689999999999	7.4278229171886245	30 min
104.19461	7.6648	7.356234645918825	30 min
90.97816	4.26358	4.686377477847431	30 min
80.35753000000001	5.68963	7.08039433267797	30 min
80.72754	6.16763	7.6400569124241855	30 min
101.75153	7.00679	6.886176551841529	30 min
96.07374	7.30698	7.605595451993438	30 min
78.42752	6.39441	8.15327323878149	30 min
85.14675	5.394880000000001	6.335978766071519	30 min
76.32986	4.78426	6.267874721635805	30 min
76.34456999999999	5.05555	6.6220164708505145	30 min
96.19573000000001	7.28943	7.577706411708711	30 min
85.44115	5.2194199999999995	6.1087895001413255	30 min
95.23221	7.03556	7.387794528762906	30 min
92.37293000000001	7.30248	7.9054329011757005	30 min
99.30752	6.93642	6.984788261755001	30 min
106.79185	7.8291	7.331177425992714	30 min
103.56309	6.9948	6.754143778444617	30 min
70.86705	5.3021199999999995	7.481784552905757	30 min
71.58545	5.211130000000001	7.2795938280754	30 min
124.54438999999999	8.08688	6.493170828489345	30 min
95.54284	6.81929	7.137416053364125	30 min
110.11692	7.859039999999999	7.136995840421253	30 min
85.54848	5.053719999999999	5.907434007009826	30 min
94.4253	6.2400400000000005	6.6084407462830415	30 min
82.37299999999999	5.761	6.993796510992681	60 min
77.36399999999999	5.602	7.2410940489116395	60 min
130.07299999999998	9.629	7.402766139014247	60 min
85.395	5.69	6.6631535804204	60 min
81.418	6.0	7.369377778869538	60 min
84.145	7.535	8.954780438528731	60 min
86.03299999999999	6.0520000000000005	7.0345100135994345	60 min
82.62200000000001	5.604	6.7826971024666545	60 min
75.098	5.774	7.688620202934832	60 min
78.108	6.101	7.810979669176012	60 min
84.542	5.831	6.8971635400156135	60 min
73.736	5.996	8.131713138765326	60 min
108.979	9.288	8.522742913772378	60 min
126.25299999999999	9.627	7.625165342605722	60 min
111.01299999999999	7.04	6.341599632475477	60 min
133.648	8.551	6.398150365138274	60 min
104.925	6.939	6.613295210864904	60 min
133.648	7.8	5.8362265054471445	60 min
127.51700000000001	8.769	6.876730161468666	60 min
121.93	7.692	6.308537685557286	60 min
92.204	6.172000000000001	6.693852761268493	60 min
107.35600000000001	6.955	6.478445545661164	60 min
72.98100000000001	5.537000000000001	7.586906181060825	60 min
80.146	6.736000000000001	8.404661492775684	60 min
115.887	84.53	7.294174497570909	60 min
87.23299999999999	5.754	6.59612761225683	60 min
75.39699999999999	5.313	7.046699470801227	60 min
101.68	7.812	7.682926829268292	60 min
138.059	9.703	7.028154629542442	60 min
87.32799999999999	5.109	5.85035727372664	60 min
123.82700000000001	8.365	6.755392604197792	60 min
77.993	6.182	7.92635236495583	60 min
82.943	6.715	8.095921295347406	60 min
97.38799999999999	6.935	7.121000533946688	60 min
89.417	6.309	7.055705290940202	60 min
95.965	6.662999999999999	6.94315635908925	60 min
87.095	6.74	7.738676158218039	60 min
102.101	7.374	7.22226031086865	60 min
133.749	9.321	6.969024067469663	60 min
103.883	7.778	7.4872693318444785	60 min
131.034	10.913	8.328372788741854	60 min
77.404	5.052	6.526794480905379	60 min
61.207	4.663	7.61840965902593	60 min
79.396	5.775	7.273666179656406	60 min
139.685	9.993	7.15395353831836	60 min
104.38600000000001	7.307	6.999980840342575	60 min
92.304	7.881	8.538091523660947	60 min
99.24	7.559	7.616888351471182	60 min
112.585	7.726	6.862370653284186	60 min
90.823	8.051	8.864494676458607	60 min
147.446	8.884	6.025256704149316	60 min
79.49600000000001	5.79	7.28338532756365	60 min
98.396	7.047000000000001	7.161876499044677	60 min
100.738	7.041	6.989418094462864	60 min
76.275	6.501	8.523107177974435	60 min
128.718	8.787	6.826551065119099	60 min
62.736999999999995	5.553999999999999	8.8528300683807	60 min
95.47200000000001	7.256	7.600134070722306	60 min
94.698	6.694	7.068787091596445	60 min
65.94800000000001	5.497999999999999	8.336871474495053	60 min
101.21700000000001	7.772	7.678552021893554	60 min
154.07	8.4	5.452067242162654	60 min
125.06700000000001	9.255	7.400033582000049	60 min
73.84899999999999	5.12	6.9330661214099045	60 min
140.412	9.952	7.087713300857476	60 min
65.737	4.414	6.714635593349255	60 min
133.743	8.513	6.365192944677478	60 min
70.514	5.093999999999999	7.224097342371727	60 min
111.82	8.779	7.851010552673941	60 min
130.91899999999998	9.283	7.090643833209848	60 min
63.621	4.857	7.634271702739662	60 min
118.316	8.243	6.966936001893235	60 min
86.919	6.489	7.465571394056536	60 min
58.056999999999995	4.273	7.360008267736879	60 min
83.32	5.16	6.192990878540567	60 min
72.318	5.391	7.454575624325894	60 min
62.683	4.303	6.864700157937559	60 min
115.61399999999999	7.8870000000000005	6.821838185686856	60 min
116.88	7.169	6.133641341546885	60 min
93.632	5.891	6.291652426520847	60 min
115.30799999999999	7.854	6.811322718284941	60 min
147.144	8.967	6.094030337628445	60 min
111.21600000000001	8.182	7.356855128758452	60 min
100.40899999999999	7.57	7.539164815902957	60 min
103.008	7.571000000000001	7.349914569742157	60 min
79.137	6.859	8.667247937121699	60 min
105.906	7.796	7.361244877532906	60 min
128.628	7.944	6.175949248997108	60 min
125.236	8.38	6.691366699671021	60 min
114.256	9.755	8.537844839658312	60 min
162.888	10.623	6.521659054073964	60 min
128.143	9.142000000000001	7.134217241675317	60 min
108.74799999999999	8.056000000000001	7.407952330157798	60 min
67.60300000000001	5.112	7.561794594914425	60 min
71.707	4.684	6.53213772713961	60 min
115.051	7.567	6.577083206577952	60 min
130.826	10.315	7.8845183679085205	60 min
90.32700000000001	7.89	8.734929755222689	60 min
132.632	7.303999999999999	5.506966644550334	60 min
128.816	9.429	7.319742889082102	60 min
76.315	6.867000000000001	8.998231016182928	60 min
94.80799999999999	6.575	6.935068770567885	60 min
100.749	6.132000000000001	6.086412768364948	60 min
110.54799999999999	7.1770000000000005	6.492202482179687	60 min
84.09100000000001	5.995	7.129181481965966	60 min
75.748	5.379	7.1011775888472295	60 min
94.087	6.859	7.290061326219349	60 min
99.87799999999999	6.566	6.574020304771823	60 min
88.155	6.562	7.443707106800522	60 min
106.42200000000001	6.367999999999999	5.983725169607787	60 min
86.77	6.457000000000001	7.44151204333295	60 min
82.977	6.075	7.321305904045699	60 min
92.62899999999999	7.111000000000001	7.676861458074686	60 min
109.512	6.77	6.181970925560669	60 min
81.271	6.324	7.781373429636647	60 min
93.73200000000001	6.147	6.558059147356292	60 min
84.999	7.101	8.354215931952142	60 min
75.84100000000001	6.068	8.000949354570745	60 min
81.37	5.428999999999999	6.671992134693375	60 min
101.37100000000001	7.337000000000001	7.237770170956191	60 min
132.299	8.995	6.798993189668854	60 min
116.601	8.066	6.917607910738331	60 min
86.7412	6.78039	7.816804471231663	60 min
140.33887	9.53838	6.796677214231525	60 min
129.79603	9.63031	7.41957207782087	60 min
75.39801	5.33491	7.075664198564392	60 min
72.02355	6.0096099999999995	8.343951388122356	60 min
93.84146	6.221419999999999	6.629713561575022	60 min
73.85749	6.3077	8.54036604818279	60 min
77.69128	4.74326	6.1052668973918305	60 min
110.26185	7.2594199999999995	6.58380028994616	60 min
116.61901	7.575419999999999	6.4958706132044854	60 min
118.16377	7.7488600000000005	6.5577291584383275	60 min
89.78156	7.29143	8.121300186808963	60 min
109.42328	7.418760000000001	6.77987353331028	60 min
108.71068999999999	7.03225	6.46877505790829	60 min
132.06066	8.91415	6.750041988280234	60 min
131.30989	7.89425	6.011923397392231	60 min
129.77043	9.06673	6.986745747856425	60 min
130.00636	8.84253	6.801613397990683	60 min
87.46006	6.0972800000000005	6.971502191971971	60 min
87.34343	6.389880000000001	7.3158107026481565	60 min
104.61322	6.50986	6.22278905094404	60 min
80.2165	6.03837	7.527590956972692	60 min
133.81308	10.10183	7.549209688619378	60 min
142.16065	10.118910000000001	7.117940161359702	60 min
111.45754	7.3385	6.584121630533027	60 min
82.93302	5.65523	6.819032997954253	60 min
140.82487	8.5718	6.086850994430174	60 min
97.51216	7.47013	7.660716366040912	60 min
112.20931000000002	7.621169999999999	6.791923058790752	60 min
69.71598	5.55558	7.968876002316828	60 min
140.53351999999998	10.687619999999999	7.605032592935836	60 min
105.49051000000001	7.508719999999999	7.117910416775877	60 min
104.30631	7.4191899999999995	7.112887034351037	60 min
126.33762	8.90982	7.052388670927947	60 min
80.61716	6.07891	7.540466570640792	60 min
94.60781999999999	6.21506	6.569287824198888	60 min
87.62937	6.888	7.8603783183651785	60 min
99.25453	6.04045	6.085817947049872	60 min
98.75864	5.95755	6.032434225501688	60 min
125.20597	8.62158	6.8859176603160375	60 min
87.77752	5.80711	6.615714365135856	60 min
121.74985	8.205680000000001	6.739786537724688	60 min
81.72793	5.52789	6.7637709654459615	60 min
75.17165	6.0583599999999995	8.059368126148621	60 min
122.52729	8.33635	6.803667982863246	60 min
121.19306	8.86585	7.315476645279853	60 min
107.8396	6.912710000000001	6.41017770837429	60 min
134.57128	9.36806	6.961411082661916	60 min
80.09145	6.13504	7.660043612645295	60 min
122.0427	8.87845	7.2748718276472095	60 min
99.54035999999999	6.794760000000001	6.826135649901207	60 min
80.45159	5.35321	6.653951773979856	60 min
72.76653	5.63382	7.7423232906667385	60 min
96.16314	7.441610000000001	7.738526424989867	60 min
110.21479	8.18188	7.423577180521779	60 min
157.08568	8.630939999999999	5.494415531702189	60 min
106.15387	5.90459	5.562293678035478	60 min
140.63253999999998	9.4091	6.690556822766625	60 min
111.73017	7.369219999999999	6.595550691456031	60 min
101.01119	6.732530000000001	6.6651328432028185	60 min
88.71723	7.3383199999999995	8.27158377239686	60 min
130.2172	8.81895	6.772492420356143	60 min
146.62724	10.13292	6.910666803794438	60 min
121.77556000000001	9.5094	7.8089560828133315	60 min
142.10188	11.29064	7.945454345853833	60 min
87.09509	5.663130000000001	6.502237956238406	60 min
81.05874	6.31876	7.79528524623008	60 min
113.77606999999999	7.65304	6.726405649272295	60 min
100.3232	6.943	6.920632515709227	60 min
87.80705999999999	5.67399	6.461883588859483	60 min
117.70125	7.71758	6.556922717473264	60 min
98.90964	6.21518	6.283694895664367	60 min
148.22214	8.91225	6.01276570423285	60 min
114.18486000000001	6.4882	5.682189390082012	60 min
155.95049	8.858880000000001	5.680572084127469	60 min
85.12037	5.54404	6.513176575712723	60 min
129.44939	8.90279	6.8774290863788545	60 min
85.70264	5.07111	5.9170989365088404	60 min
98.25357	6.7947	6.915473911024302	60 min
98.71784	6.03509	6.113474524969348	60 min
108.75943999999998	7.03483	6.468247721760981	60 min
102.49471	7.36643	7.187131901734246	60 min
70.26697	6.40015	9.108333545618946	60 min
128.53624	10.83636	8.430587358086717	60 min
131.78837	8.597710000000001	6.523876120480132	60 min
101.45172	6.85832	6.760181098950318	60 min
66.15804	4.9164	7.431296332237171	60 min
79.35821	5.961180000000001	7.5117369708817785	60 min
103.43303	7.510689999999999	7.261403828158181	60 min
108.4362	8.96526	8.267774045936688	60 min
78.24706	5.68039	7.25955710029233	60 min
83.42392	6.1152	7.330271701449656	60 min
80.26165999999999	5.05288	6.2955089640558155	60 min
72.97039000000001	6.25251	8.568557739653029	60 min
121.26463999999999	7.325819999999999	6.0411839758069625	60 min
103.26085	7.878019999999999	7.629241866593195	60 min
129.61123999999998	7.782139999999999	6.004216918224068	60 min
131.59367	9.37354	7.123093382835208	60 min
97.15518	7.0533600000000005	7.259890826201959	60 min
82.95823	5.97296	7.199960751332327	60 min
122.33638	7.53067	6.155707729785694	60 min
97.34271	5.92519	6.08693758371839	60 min
78.00354	3.03327	3.888631208275932	60 min
94.74122	6.49138	6.851695597755655	60 min
88.52148000000001	7.01837	7.928437256132635	60 min
99.9706	6.1812	6.183017807235326	60 min
94.94033	5.92818	6.244111432938984	60 min
129.18769	9.855139999999999	7.628544174758445	60 min
75.76980999999999	5.09973	6.73055666894242	60 min
61.06814	3.83365	6.2776596765514725	60 min
88.81111999999999	6.22757	7.012151181068317	60 min
80.01056	6.04064	7.549803425947775	60 min
82.06671999999999	5.77484	7.036762283176421	60 min
88.42619	5.11722	5.786995911505403	60 min
87.4457	7.16184	8.190042506378244	60 min
74.42652	5.53238	7.43334499584288	60 min
116.39563999999999	7.83703	6.733095844483524	60 min
82.45905	6.54244	7.934168535776243	60 min
72.88268000000001	5.66639	7.774672940127887	60 min
108.07052	7.906460000000001	7.316019206717985	60 min
115.81631999999999	8.698080000000001	7.510236899255649	60 min
104.89376999999999	9.3073	8.873072252050813	60 min
114.07614	8.36365	7.331638325069554	60 min
74.08559	4.5681	6.165976406477967	60 min
96.22516	5.3823099999999995	5.59345393657958	60 min
100.40946	8.259030000000001	8.2253504799249	60 min
94.32503	7.780469999999999	8.248574105939854	60 min
112.53992	7.373480000000001	6.551879546386741	60 min
111.8235	8.81962	7.88708992295895	60 min
78.67614	5.4345300000000005	6.90746902428106	60 min
99.76767	8.07483	8.09363393973218	60 min
79.08646999999999	6.0025	7.589793804174091	60 min
84.0322	6.2552900000000005	7.44392030673956	60 min
60.690580000000004	5.06224	8.341063802652734	60 min
68.90541	5.39018	7.822578807672722	60 min
110.23688999999999	8.0403	7.293656415742499	60 min
132.32515	8.97893	6.785505249757888	60 min
122.23803999999998	7.82647	6.402646835633163	60 min
109.75033	6.5122599999999995	5.933704254009988	60 min
95.09227	7.972289999999999	8.383741391387543	60 min
105.99139	6.569	6.1976732260988365	60 min
118.64045	7.4953199999999995	6.31767664401138	60 min
124.77277	7.87248	6.309453577090579	60 min
87.2529	6.30697	7.228378655609155	60 min
110.87118999999998	7.41425	6.687264743888832	60 min
72.38593	5.57111	7.6963990101391255	60 min
104.66633	7.154660000000001	6.835684407774687	60 min
125.51773	7.67098	6.111471263860492	60 min
114.1193	8.52325	7.468719138655776	60 min
79.94058000000001	4.962359999999999	6.2075606656844355	60 min
101.4333	6.6967300000000005	6.602102071016127	60 min
71.15346	5.62518	7.905701282832908	60 min
81.57785	6.2748099999999996	7.691806047842643	60 min
78.76378000000001	5.78771	7.348187199750949	60 min
142.53365	10.24817	7.190000396397622	60 min
108.33185	6.25328	5.77233749815959	60 min
90.61504000000001	6.85889	7.56926223284788	60 min
123.23375	7.57222	6.14459918650532	60 min
74.89050999999999	4.7009099999999995	6.277043646785153	60 min
66.25385	5.274290000000001	7.960729829285393	60 min
85.32981	6.3070699999999995	7.391402840343837	60 min
103.67064	7.0275300000000005	6.778708031512104	60 min
63.5705	4.099469999999999	6.4486986888572515	60 min
72.74122	5.73064	7.878119173695465	60 min
91.46095	5.977609999999999	6.535696381898504	60 min
83.21613	5.17719	6.221377994867101	60 min
81.95835	5.17318	6.31196211246322	60 min
107.74462	7.885730000000001	7.318908359415069	60 min
117.14135	8.54449	7.294170675000758	60 min
112.14371000000001	8.212660000000001	7.323335388137239	60 min
111.03818000000001	7.39213	6.657286709850611	60 min
111.50505	8.46459	7.591216720677672	60 min
74.98127	5.94417	7.927539770932128	60 min
73.57987	5.75132	7.816431314706046	60 min
89.71011	7.24985	8.081419139938632	60 min
75.65921	4.6275699999999995	6.1163340193480735	60 min
80.08331	5.32702	6.65184793185996	60 min
121.35128	8.14547	6.712306619262688	60 min
82.81709000000001	4.96382	5.9937145823404325	60 min
83.31366	5.18851	6.227682231221147	60 min
98.10244	6.74016	6.870532476052584	60 min
122.96796	8.286769999999999	6.738966800782902	60 min
98.62286	8.14883	8.262617814977178	60 min
142.71997	10.538219999999999	7.3838440408864985	90 min
112.01563999999999	7.55247	6.742335266753821	90 min
137.07017	9.571110000000001	6.9826352444153255	90 min
120.98418999999998	7.82562	6.468299700977459	90 min
96.02641	6.798039999999999	7.079344109604848	90 min
110.9165	7.8155	7.046291579701848	90 min
118.27913000000001	8.06385	6.817643991801428	90 min
102.59834000000001	6.95275	6.77666909620565	90 min
129.19233	7.443919999999999	5.7618900440916265	90 min
83.62335999999999	6.07455	7.264178334857629	90 min
119.89698	8.46845	7.063105342603292	90 min
99.22275	7.24344	7.300180654134259	90 min
84.51509	6.14203	7.267376748933238	90 min
85.64277	5.58948	6.526505389771957	90 min
76.19360999999999	6.256390000000001	8.211174139143692	90 min
98.66977	6.811910000000001	6.903745696376916	90 min
86.71219	6.2455300000000005	7.202597466400053	90 min
84.81967	5.8353	6.879654212283542	90 min
114.74372	9.0032	7.846355338662543	90 min
92.97549000000001	7.360339999999999	7.916430448497769	90 min
129.99018999999998	8.004719999999999	6.157941610824632	90 min
138.73613	9.33015	6.725104700556372	90 min
96.07356999999999	6.810810000000001	7.089160941973949	90 min
105.35056999999999	7.50472	7.123568481879121	90 min
100.18356999999999	7.821160000000001	7.806829003997364	90 min
156.97778	10.189639999999999	6.491135242197972	90 min
111.79993	7.03654	6.293867983638273	90 min
89.79725	6.21649	6.922806656105839	90 min
86.20761	6.24196	7.240613676681211	90 min
63.9161	4.71178	7.371820245603221	90 min
142.13478	10.39316	7.31218636283111	90 min
79.05435	4.80769	6.081499626522765	90 min
92.94879	5.62509	6.051816274316212	90 min
96.23834000000001	6.956739999999999	7.228657518406903	90 min
93.4667	6.95804	7.444405333664288	90 min
82.22251999999999	6.253830000000001	7.6059819134709095	90 min
80.59434	5.67795	7.045097707853926	90 min
86.78260999999999	5.74385	6.61866473018039	90 min
113.08705	8.04575	7.11465194290593	90 min
133.46393	9.06128	6.789310040548034	90 min
116.27627	5.94475	5.112608101377865	90 min
100.38869	8.90306	8.86858868264941	90 min
89.44749	5.7579	6.437184542573526	90 min
126.25327	8.9723	7.10658820955687	90 min
98.01436	6.91775	7.057894373844813	90 min
110.42553000000001	6.730760000000001	6.095293361960771	90 min
136.51568	10.16164	7.443569852195734	90 min
94.82701999999999	7.09925	7.486526519551074	90 min
82.79527	5.2403900000000005	6.329334997035459	90 min
100.16674	7.452939999999999	7.4405336541850104	90 min
88.7195	6.87591	7.750167663253288	90 min
78.30501	4.62697	5.908906722571136	90 min
123.27251000000001	9.15123	7.423577243620658	90 min
137.65513	8.518880000000001	6.188567037058481	90 min
112.73093	7.09802	6.296426366747795	90 min
122.55237	6.83355	5.576024355954927	90 min
88.90615	6.2649	7.046644129793046	90 min
136.65108	9.52009	6.966714057437379	90 min
121.04278000000001	8.59812	7.103372873623688	90 min
85.03898000000001	6.41959	7.548996942343382	90 min
101.78081	8.24514	8.10087874128728	90 min
87.91285	6.367319999999999	7.242763714292051	90 min
88.28146	5.76925	6.53506410066168	90 min
84.61494	5.43154	6.419126456864473	90 min
67.01841	7.1520600000000005	10.67178406649755	90 min
134.6855	7.75811	5.760167204338998	90 min
77.90162	5.6117099999999995	7.203585753415655	90 min
69.6299	4.54686	6.530039537612432	90 min
124.08012	8.56656	6.904055218515263	90 min
75.72998	5.739	7.578240480190276	90 min
72.55884	4.92307	6.784934819795906	90 min
90.61364	7.333539999999999	8.093196565108741	90 min
191.7604	12.282680000000001	6.405222350391426	90 min
92.73267	6.11397	6.593113300846401	90 min
83.99672	5.41605	6.4479303477564365	90 min
124.8563	9.44779	7.566930943813007	90 min
112.19435	8.976180000000001	8.000563308223633	90 min
126.18364	9.146980000000001	7.248942889902368	90 min
83.22709	7.26825	8.733033919604782	90 min
89.82894	5.75289	6.4042723870503195	90 min
111.35128	7.63779	6.859184735011578	90 min
119.05196000000001	8.343010000000001	7.007872864923854	90 min
82.70536	5.3135699999999995	6.424698471779822	90 min
85.86194	5.84615	6.808779303146423	90 min
99.73182	6.40627	6.423496533002206	90 min
93.31002	6.43919	6.90085587807183	90 min
75.33223000000001	4.5686	6.0646020966059275	90 min
112.95806	9.59511	8.494400488110365	90 min
98.39175999999999	6.35274	6.456577258095598	90 min
98.8426	6.221830000000001	6.294684680492015	90 min
114.21243999999999	8.97332	7.8566923182798645	90 min
76.02731999999999	6.895010000000001	9.069121468440558	90 min
125.94143000000001	7.98665	6.3415589294166335	90 min
108.73	6.95875	6.400027591281156	90 min
102.18054000000001	7.37887	7.221404388741731	90 min
101.4976	8.23123	8.109777965193265	90 min
111.77195	7.120989999999999	6.370999163922611	90 min
99.32913	7.409510000000001	7.459553909311397	90 min
74.68645	5.91563	7.920620139262209	90 min
109.17918999999999	7.052569999999999	6.459628432854283	90 min
86.45262	5.66894	6.557279582735608	90 min
90.20715	5.7895199999999996	6.418027839256644	90 min
81.14958	6.609310000000001	8.14460161100033	90 min
93.3797	5.783580000000001	6.193615957215541	90 min
74.16959	5.26805	7.10270880559	90 min
72.41814000000001	4.26267	5.886190946080636	90 min
142.7987	9.01212	6.311065857042116	90 min
155.09286	10.83881	6.988593801158867	90 min
80.76892	5.78653	7.164302803603169	90 min
81.5537	5.44324	6.674424336357516	90 min
66.32578000000001	5.30922	8.004760743107733	90 min
156.13487	9.85818	6.31388747433549	90 min
81.18493000000001	5.33114	6.566662064006214	90 min
121.09348999999999	9.88955	8.166871728612332	90 min
115.98683	7.3056399999999995	6.2986806346893	90 min
93.81214	7.772289999999999	8.284951180092468	90 min
68.26649	5.83014	8.540266241899943	90 min
110.70505	8.17535	7.3848031322871	90 min
116.07833000000001	8.21413	7.07636817311207	90 min
91.56902	6.74012	7.360699066125203	90 min
139.96238	9.747119999999999	6.964099924565444	90 min
98.05353000000001	6.8796	7.0161675974337685	90 min
124.05881000000001	7.33168	5.909842275611059	90 min
82.02563	5.47159	6.670585766912122	90 min
95.31873	5.20814	5.463920889420159	90 min
92.64532	5.55654	5.997647803472426	90 min
117.77033999999999	7.53649	6.399310726283036	90 min
140.38862	7.6946	5.4809285823879454	90 min
105.90851	7.56686	7.144713866713827	90 min
107.09238	9.33658	8.718248674648933	90 min
122.11368999999999	7.535639999999999	6.171003431310608	90 min
93.68758000000001	6.77025	7.226411441089629	90 min
105.96143000000001	6.46362	6.099974301970065	90 min
84.19304	5.97233	7.093614864126536	90 min
92.04368000000001	7.04056	7.649150924865237	90 min
119.10666	8.94373	7.509009151965137	90 min
131.83077	8.67528	6.580618470179609	90 min
67.7788	5.31043	7.834942489391963	90 min
87.541	4.8074	5.491598222547149	90 min
86.40984	5.69801	6.594167979017204	90 min
146.4088	10.30004	7.035123571807158	90 min
124.81388999999999	8.1584	6.536451992642807	90 min
74.44711	5.56695	7.477724790122814	90 min
109.37656000000001	7.39003	6.756502490113054	90 min
111.78473000000001	7.42673	6.643778627009252	90 min
143.4437	9.32232	6.498940002244782	90 min
100.00155	6.81948	6.819374299698355	90 min
106.67395	8.60774	8.069205274577344	90 min
81.66829	5.7171	7.0003914616064575	90 min
105.23241000000002	6.46057	6.1393348304006325	90 min
89.65462	6.383319999999999	7.119900792619499	90 min
123.95934	9.09956	7.34076189821598	90 min
106.09719	8.538860000000001	8.048149060309704	90 min
108.3404	8.26483	7.628576228258341	90 min
127.21485	9.47516	7.448155620196857	90 min
136.92152	8.14334	5.947450773260479	90 min
64.73513	4.80474	7.4221523923718085	90 min
65.40501	4.93734	7.548871256192759	90 min
135.55928	6.45514	4.761857690598534	90 min
114.83372	6.9835199999999995	6.081419290431416	90 min
57.61731999999999	4.42044	7.672068051759437	90 min
84.64528	7.050619999999999	8.329607982866854	90 min
81.50843	5.4435	6.6784503148938095	90 min
75.72391	5.52251	7.292954101287162	90 min
80.59711	5.7192300000000005	7.096073295928353	90 min
91.69094	6.21436	6.777507134292658	90 min
128.725	8.26254	6.418753155952612	90 min
105.65773	7.8360899999999996	7.416485286973323	90 min
153.16665	9.131739999999999	5.961963652009102	90 min
139.12713	9.77605	7.026702843650984	90 min
109.91587	9.449539999999999	8.59706610155567	90 min
142.88282	9.12776	6.388283769875203	90 min
113.06611000000001	7.72623	6.833373855348874	90 min
104.13427	7.469710000000001	7.173152507815152	90 min
109.57471000000001	7.230989999999999	6.5991413529636525	90 min
103.64541	7.93545	7.656344839583346	90 min
103.5964	7.0933399999999995	6.8470912116637255	90 min
96.14602	5.8715	6.106857049308958	90 min
102.6417	7.86538	7.662947905188632	90 min
89.93385	6.4629900000000005	7.18638199076321	90 min
90.06874	6.3585400000000005	7.05965243879286	90 min
139.38637	8.6425	6.200391042538808	90 min
117.6094	8.47223	7.203701404819683	90 min
72.45383000000001	5.347	7.37987211994176	90 min
74.10268	4.637230000000001	6.257843845863604	90 min
104.37291	6.61716	6.339920962249687	90 min
68.61913	5.4474599999999995	7.938689983390929	90 min
140.962	11.0313	7.825726082206552	90 min
54.97276	3.54092	6.441226527465603	90 min
75.68777	5.72502	7.563996138345733	90 min
103.81695	7.55738	7.279524201009566	90 min
108.26763000000001	6.48171	5.986747839589727	90 min
59.170680000000004	3.9260800000000002	6.635178098341949	90 min
97.01482	5.9189300000000005	6.101057549764047	90 min
102.39979	7.8224100000000005	7.6390879317232985	90 min
134.82567	8.09474	6.003856683968268	90 min
152.39925	9.49878	6.2328259489466	90 min
106.95183	7.69597	7.195734752738686	90 min
103.97574	7.45033	7.16545032523933	90 min
86.17829	6.76496	7.849958498828418	90 min
119.11008000000001	6.812639999999999	5.719616677278697	90 min
128.26168	9.01835	7.031211504480527	90 min
138.12797	8.6418	6.256372261172014	90 min
95.47825999999999	6.0016	6.285828836847257	90 min
85.16521	6.21898	7.3022540542082846	90 min
98.5074	5.9602	6.05050991093055	90 min
93.22098000000001	7.12029	7.6380767505340526	90 min
133.70887	9.79895	7.32857139545043	90 min
80.57814	5.04591	6.262132632994506	90 min
90.6036	6.0949599999999995	6.727061617860658	90 min
71.304	5.387519999999999	7.555705149781218	90 min
68.44704	4.9164	7.182779562125696	90 min
115.59186000000001	6.44457	5.575280127856753	90 min
81.7821	6.30057	7.704094172196604	90 min
112.16026000000001	6.8470699999999995	6.104720156675813	90 min
126.4446	7.892869999999999	6.242156644095517	90 min
151.65624	9.46768	6.242855552794927	90 min
108.90813	7.648389999999999	7.022790676876005	90 min
149.81863	9.14358	6.103099460994938	90 min
97.34936	8.0677	8.287368299082809	90 min
118.46682	8.55119	7.2182151930810665	90 min
158.04547	9.79236	6.195913112852903	90 min
90.82500999999999	6.74798	7.429649608626524	90 min
93.19734	6.5424	7.019942843862282	90 min
104.41789	6.189430000000001	5.927557049850366	90 min
133.52456999999998	8.710989999999999	6.523885454190191	90 min
97.97439	6.48658	6.620689345450377	90 min
108.86231000000001	7.79045	7.156241678134516	90 min
89.35864000000001	6.47037	7.240900264372868	90 min
110.43041000000001	7.53845	6.82642580064676	90 min
117.20306000000001	7.022139999999999	5.991430599166949	90 min
82.9591	5.295640000000001	6.383434728679554	90 min
76.50156	4.8039	6.27947979100034	90 min
138.80335	10.587769999999999	7.627892266288962	90 min
104.52509	7.933910000000001	7.590435942222102	90 min
107.59322	6.35166	5.903401719922501	90 min
120.77296000000001	8.27305	6.850084654710789	90 min
90.82245	6.08145	6.6959766004991055	90 min
110.60946000000001	7.67859	6.942073489916684	90 min
93.37427	7.0092300000000005	7.506596838722274	90 min
115.4471	7.030710000000001	6.089984070626287	90 min
122.94163	8.38827	6.822969566940018	90 min
96.45785	6.39382	6.628615504077688	90 min
129.33523	7.878419999999999	6.091472524539523	90 min
119.31628	5.0134300000000005	4.201798782194685	90 min
108.20003	7.702160000000001	7.118445346087244	90 min
116.50041	6.89987	5.922614349597568	90 min
82.90765999999999	5.46547	6.592237677435355	90 min
82.57353	5.20406	6.302334416368054	90 min
114.96491999999999	6.855810000000001	5.963393007188629	90 min
75.02529	5.73267	7.640983460377162	90 min
69.69972	4.75901	6.827875348710152	90 min
145.30206	10.94782	7.534524975076058	90 min
80.71455	5.21622	6.462552290757985	90 min
70.32437	5.73179	8.150503161279653	90 min
124.49533000000001	8.88841	7.139552945479963	90 min
104.48491999999999	7.62277	7.2955695424756035	90 min
113.40825	6.70914	5.915918815430095	90 min
142.79495	9.22374	6.45943011289965	90 min
106.73573	7.55775	7.0808060243744055	90 min
76.53008	6.740760000000001	8.807987656618158	90 min
128.58666000000002	8.771519999999999	6.821485214718227	90 min
107.02731999999999	8.760539999999999	8.185330623993949	90 min
69.21163	5.534590000000001	7.996618487384274	90 min
79.19969	5.085030000000001	6.420517555056088	90 min
78.96768	6.0458300000000005	7.65608157666529	90 min
87.42047	5.53265	6.328780890791368	90 min
123.38793000000001	8.582139999999999	6.955412899786874	90 min
76.86881	7.1295399999999995	9.274945195587131	90 min
78.39690999999999	7.17762	9.155488398713675	90 min
113.91885	8.374189999999999	7.351013462653458	90 min
71.78315	5.06714	7.058954643255415	90 min
114.49578000000001	7.56659	6.608619112424928	90 min
92.26446	6.44377	6.984021799943337	90 min
104.92638999999998	6.77203	6.454076996263762	90 min
80.66705	5.51644	6.838529486326821	90 min
73.75712	5.641769999999999	7.649119163004195	90 min
90.10878000000001	5.38647	5.977741569689435	90 min
145.75053	11.02388	7.56352652714196	90 min
89.45411	5.76435	6.443918563384064	90 min
141.34063999999998	10.04829	7.109271615014621	90 min
121.59758000000001	8.80503	7.241122726291099	90 min
109.05516000000001	7.64722	7.012249580854311	90 min
96.03058	6.794569999999999	7.0754232662137415	90 min
146.54925	9.77467	6.669887426923031	90 min
143.88669	9.40291	6.534940792647326	90 min
65.89520999999999	4.52815	6.871743788357304	90 min
72.17859	5.5949599999999995	7.7515507022234695	90 min
109.82405	5.17239	4.7097061162832725	90 min
99.80887	6.6071	6.619752332633362	90 min
84.09599	6.33317	7.530882269178352	90 min
81.64373	6.162669999999999	7.548246509560501	90 min
116.03627	7.53604	6.494555538539803	90 min
137.51376000000002	9.67244	7.033797926840194	90 min
150.79263	8.900739999999999	5.902635957738783	90 min
86.9556	5.504	6.3296670944712	90 min
88.1789	5.886080000000001	6.675156981999096	90 min
89.57173	6.58978	7.3569864063136885	90 min
64.45040999999999	5.39104	8.36463259116583	90 min
114.19833999999999	7.96023	6.970530394750048	90 min
99.43319	7.30961	7.351277777571051	90 min
139.27584	9.77798	7.020585910664765	90 min
113.53908999999999	7.27601	6.40837441977032	90 min
79.41429000000001	6.3528	7.999567835965038	90 min
104.1232	7.58085	7.2806540713308845	90 min
100.5257	7.2453	7.207410642253673	90 min
130.62562	8.091560000000001	6.1944662922939635	90 min
88.86820999999999	5.9621	6.708923247131906	90 min
98.35275	6.39613	6.503254865776503	90 min
97.93508	6.66878	6.809388423433156	90 min
84.04241999999999	6.5872399999999995	7.8379941938844695	90 min
85.81155	7.00723	8.165835484850232	90 min
77.86139	5.70521	7.327392947903961	90 min
80.23343	6.92598	8.632287065379106	90 min
100.1222	6.460780000000001	6.452894562844206	90 min
129.04543999999999	9.261289999999999	7.176766571527053	90 min
67.50698	5.14516	7.62167112200842	90 min
91.57829	8.883189999999999	9.70010468638364	90 min
106.19563000000001	7.290769999999999	6.86541433013769	90 min
101.37693	7.166639999999999	7.069300678172044	90 min
110.49553	7.1428899999999995	6.464415347842577	90 min
93.54098	6.50031	6.94915747087533	90 min
96.78603000000001	5.9411	6.138385880689599	90 min
70.36541	4.98382	7.082769787030303	90 min
137.18808	7.41328	5.403734785121273	90 min
75.30975	6.3602	8.445387217458563	90 min
129.00517	8.67132	6.721684099947313	90 min
127.8437	7.84658	6.137635253047276	90 min
94.15264	6.77495	7.195709010389936	90 min
87.69849	5.837280000000001	6.656078114913952	90 min
118.25906	7.84474	6.633521355573095	90 min
98.38566	7.0359300000000005	7.151377548313444	90 min
96.36950999999999	6.56198	6.80918684758281	90 min
