# Supplementary material for: Control of nuclear size by osmotic forces in Schizosaccharomyces pombe
Source: eLife. 2022 Jul 20;11:e76075. doi: 10.7554/eLife.76075 (PMC9410708; doi:10.7554/eLife.76075)
Supplement: Figure 6—source data 1. — Related to Figure 6B–E. [file elife-76075-fig6-data1.xlsx]

## Sheet: Sheet1
Volume Cell	Volume Nucl	Time	NC	date	Condition			Volume Cell	Volume Nucl	Time	NC	date	Condition
121.86106000000001	8.88515	0	7.291213452435092	2020-05-27	CHX			90.67489	7.27617	0	8.024459693306492	2020-05-27	Ctrl
92.62931999999999	7.502730000000001	0	8.099735591279307	2020-05-27	CHX			97.91825	7.674639999999999	0	7.837803473816168	2020-05-27	Ctrl
85.19081	7.74178	0	9.087576465114019	2020-05-27	CHX			92.52951999999999	7.423839999999999	0	8.023212483972681	2020-05-27	Ctrl
103.84291	8.06274	0	7.764362535680096	2020-05-27	CHX			98.93143	7.40975	0	7.489783580405135	2020-05-27	Ctrl
103.29682	7.8479600000000005	0	7.597484607948242	2020-05-27	CHX			93.85256	7.35798	0	7.839935319825053	2020-05-27	Ctrl
95.09652	7.64146	0	8.03547805955465	2020-05-27	CHX			93.60499	6.670839999999999	0	7.126585879663039	2020-05-27	Ctrl
88.12009	7.4783	0	8.486487020156243	2020-05-27	CHX			88.63614	7.045089999999999	0	7.948326720906392	2020-05-27	Ctrl
96.38631	7.64618	0	7.9328485549452	2020-05-27	CHX			93.75243	7.11868	0	7.593061854503398	2020-05-27	Ctrl
90.62533	6.73557	0	7.4323260395300075	2020-05-27	CHX			106.23416999999999	8.44534	0	7.949739711808357	2020-05-27	Ctrl
91.4635	7.63085	0	8.343054879815446	2020-05-27	CHX			100.882	8.96261	0	8.884250907000258	2020-05-27	Ctrl
118.31238	9.939739999999999	0	8.401267897746624	2020-05-27	CHX			90.56644	7.5685	0	8.356848298332142	2020-05-27	Ctrl
105.84758000000001	7.96157	0	7.521730775517022	2020-05-27	CHX			93.68365	6.879	0	7.342796742014214	2020-05-27	Ctrl
121.36587	10.17229	0	8.381507914869312	2020-05-27	CHX			88.32526999999999	7.32333	0	8.29131912079069	2020-05-27	Ctrl
87.34600999999999	7.199319999999999	0	8.242299791369977	2020-05-27	CHX			99.95527	7.37298	0	7.376279409779995	2020-05-27	Ctrl
84.46108000000001	6.65925	0	7.884400720426496	2020-05-27	CHX			99.70484	7.8183	0	7.841444808496758	2020-05-27	Ctrl
92.93691	8.27187	0	8.900521870159015	2020-05-27	CHX			101.98525	7.72842	0	7.577978188022288	2020-05-27	Ctrl
90.54945	7.42207	0	8.196703569154755	2020-05-27	CHX			89.8498	7.544630000000001	0	8.396935775037898	2020-05-27	Ctrl
115.22551000000001	8.82192	0	7.6562212655860655	2020-05-27	CHX			92.90149	7.25833	0	7.812931740922562	2020-05-27	Ctrl
98.07888	8.23223	0	8.393478799921043	2020-05-27	CHX			88.37859	7.35135	0	8.318021366939663	2020-05-27	Ctrl
92.11426999999999	6.2028099999999995	0	6.733820937841662	2020-05-27	CHX			86.06165	6.4414	0	7.484634561387098	2020-05-27	Ctrl
86.77049	6.99808	0	8.065046077301165	2020-05-27	CHX			83.51467	7.570989999999999	0	9.065461193823792	2020-05-27	Ctrl
79.81119	6.721089999999999	0	8.42123767356432	2020-05-27	CHX			87.28449	6.9603600000000005	0	7.974337708795686	2020-05-27	Ctrl
89.57313	7.5953800000000005	0	8.47952951962268	2020-05-27	CHX			98.35123	8.31109	0	8.450417956135373	2020-05-27	Ctrl
103.11296	8.24361	0	7.994737034025596	2020-05-27	CHX			83.71778	7.02796	0	8.394823656336802	2020-05-27	Ctrl
106.78001	7.406689999999999	0	6.936401298332899	2020-05-27	CHX			99.62957	7.40716	0	7.434700360545569	2020-05-27	Ctrl
95.75782	7.245589999999999	0	7.566577852336236	2020-05-27	CHX			78.3625	6.331180000000001	0	8.079349178497369	2020-05-27	Ctrl
138.22028999999998	11.21138	0	8.111240397484336	2020-05-27	CHX			102.22593	8.23404	0	8.054746970753897	2020-05-27	Ctrl
92.90283000000001	7.7415199999999995	0	8.332921612829232	2020-05-27	CHX			91.41351999999999	7.88346	0	8.623954093442634	2020-05-27	Ctrl
95.02199	6.1730599999999995	0	6.496454136563546	2020-05-27	CHX			91.20934	8.07012	0	8.847909654866486	2020-05-27	Ctrl
114.1184	9.33425	0	8.179443455218442	2020-11-12	CHX			87.5691	7.42278	0	8.476483143026478	2020-05-27	Ctrl
93.95758000000001	8.98893	0	9.567008856549945	2020-11-12	CHX			94.92671999999999	7.833939999999999	0	8.252618440835205	2020-05-27	Ctrl
99.05371	8.31634	0	8.395788507063491	2020-11-12	CHX			109.42331999999999	8.8421	0	8.080635827902134	2020-05-27	Ctrl
114.31442	9.651819999999999	0	8.443221773770972	2020-11-12	CHX			97.63103000000001	7.283360000000001	0	7.460087228414983	2020-11-26	Ctrl
87.66781	7.3931	0	8.433083933544136	2020-11-12	CHX			129.44168	10.87844	0	8.40412454473706	2020-11-26	Ctrl
107.45318999999999	7.78452	0	7.244568541892521	2020-11-12	CHX			83.05513	6.6609	0	8.019853800722483	2020-11-26	Ctrl
81.73989	6.63828	0	8.121224533089046	2020-11-12	CHX			82.09191	6.79782	0	8.28074288928105	2020-11-26	Ctrl
84.99953000000001	6.603460000000001	0	7.768819427589777	2020-11-12	CHX			110.86932	8.83071	0	7.964971734290424	2020-11-26	Ctrl
91.10406	7.20635	0	7.910020695016226	2020-11-12	CHX			102.74051	9.06794	0	8.826060917937822	2020-11-26	Ctrl
108.13105	5.65935	0	5.233788074748187	2020-11-12	CHX			115.26435	9.12783	0	7.91904001540806	2020-11-26	Ctrl
86.5196	7.70605	0	8.90671015584908	2020-11-12	CHX			121.52671000000001	10.08115	0	8.295419171637246	2020-11-26	Ctrl
99.3807	8.0312	0	8.081247163684699	2020-11-12	CHX			126.41063	9.67603	0	7.654443301168581	2020-11-26	Ctrl
91.70289	7.8339300000000005	0	8.542729678421258	2020-11-12	CHX			121.77136000000002	8.1563	0	6.698044597678797	2020-11-26	Ctrl
104.7232	8.8047	0	8.407592586933935	2020-11-12	CHX			102.43389	8.06222	0	7.870656869518476	2020-11-26	Ctrl
94.72778000000001	7.526839999999999	0	7.945757833657664	2020-11-12	CHX			101.21392	7.8561	0	7.761877022449086	2020-11-26	Ctrl
104.41806	8.89091	0	8.514724368562296	2020-11-12	CHX			102.61785	7.832439999999999	0	7.632629216067184	2020-11-26	Ctrl
95.10511	7.94366	0	8.352505979962592	2020-11-12	CHX			100.84784	8.211839999999999	0	8.142802066955522	2020-11-26	Ctrl
106.58116000000001	8.42388	0	7.903723322208164	2020-11-12	CHX			96.16212	7.8887100000000006	0	8.20355250071442	2020-11-26	Ctrl
110.32307	8.65403	0	7.844261404255701	2020-11-12	CHX			113.15534	7.67627	0	6.783833621992564	2020-11-26	Ctrl
90.16677	7.360589999999999	0	8.163306725970111	2020-11-12	CHX			97.12236999999999	8.15358	0	8.395161691379649	2020-11-26	Ctrl
98.12181	8.4966	0	8.659236921944267	2020-11-12	CHX			113.24553999999999	8.73658	0	7.714723246496066	2020-11-26	Ctrl
119.0745	9.60422	0	8.065723559620238	2020-11-12	CHX			113.0762	8.66761	0	7.6652823494245474	2020-11-26	Ctrl
130.05768	8.84715	15	6.802481791156046	2020-05-27	CHX			144.63498	9.85215	0	6.811733924946786	2020-11-26	Ctrl
97.17357	7.66575	15	7.888719123934626	2020-05-27	CHX			120.58578	9.14325	0	7.582361701354837	2020-11-26	Ctrl
91.69185999999999	7.43763	15	8.111548833233398	2020-05-27	CHX			84.90835	6.28505	0	7.402157738314312	2020-11-26	Ctrl
110.76257	8.12288	15	7.333596538975216	2020-05-27	CHX			86.58935	6.44875	0	7.44750942234813	2020-11-26	Ctrl
107.69533999999999	7.8664	15	7.304308617253078	2020-05-27	CHX			90.77465	7.149830000000001	0	7.876461104504397	2020-11-26	Ctrl
99.83968	7.64613	15	7.658407959640897	2020-05-27	CHX			104.95926000000001	8.37421	15	7.978533766339433	2020-05-27	Ctrl
90.22749	8.093069999999999	15	8.96962777087116	2020-05-27	CHX			110.70485	8.487210000000001	15	7.666520482164965	2020-05-27	Ctrl
99.16434	7.49785	15	7.561034541247388	2020-05-27	CHX			100.80643	8.32843	15	8.261804331330849	2020-05-27	Ctrl
94.0581	6.750139999999999	15	7.176564272508162	2020-05-27	CHX			105.33703999999999	7.92851	15	7.526801588501064	2020-05-27	Ctrl
95.73389	6.89385	15	7.201054924227982	2020-05-27	CHX			101.79006	7.3954	15	7.265345948317548	2020-05-27	Ctrl
122.10043	9.36738	15	7.671864873858348	2020-05-27	CHX			106.03088999999999	7.971839999999999	15	7.518412794611081	2020-05-27	Ctrl
113.15278	8.18447	15	7.233114378630378	2020-05-27	CHX			98.67097	8.12372	15	8.233140912671681	2020-05-27	Ctrl
122.91423999999999	9.91667	15	8.067958602681024	2020-05-27	CHX			101.91051	8.178460000000001	15	8.025138918449139	2020-05-27	Ctrl
89.69384000000001	6.747739999999999	15	7.5230807377630375	2020-05-27	CHX			110.3959	8.84278	15	8.010061967881052	2020-05-27	Ctrl
88.91036	6.7835600000000005	15	7.629662055130583	2020-05-27	CHX			103.49603	8.65629	15	8.36388603504888	2020-05-27	Ctrl
96.44733000000001	7.605060000000001	15	7.885194955630187	2020-05-27	CHX			95.37946	7.807589999999999	15	8.185819043219578	2020-05-27	Ctrl
98.77908000000001	7.29122	15	7.38134025949624	2020-05-27	CHX			97.47308000000001	7.5983600000000004	15	7.795342057519881	2020-05-27	Ctrl
117.30355	8.4731	15	7.223225554554828	2020-05-27	CHX			94.71921999999999	8.19442	15	8.651274788791545	2020-05-27	Ctrl
102.87524	8.38336	15	8.14905510791518	2020-05-27	CHX			109.77486999999999	8.19197	15	7.462518516305235	2020-05-27	Ctrl
99.73925	7.011480000000001	15	7.029810230175182	2020-05-27	CHX			107.5602	7.866619999999999	15	7.313690379898884	2020-05-27	Ctrl
93.40699000000001	6.9795	15	7.472138862412758	2020-05-27	CHX			110.02933	8.42125	15	7.653641079155894	2020-05-27	Ctrl
84.72026	7.009810000000001	15	8.274065731148609	2020-05-27	CHX			96.30056	7.74682	15	8.044418433288445	2020-05-27	Ctrl
94.29656999999999	8.16536	15	8.659233310395066	2020-05-27	CHX			100.14095999999999	7.508439999999999	15	7.4978710010369385	2020-05-27	Ctrl
104.44286	7.93653	15	7.598920596391175	2020-05-27	CHX			96.14463	7.7149600000000005	15	8.02432751574373	2020-05-27	Ctrl
107.37716999999999	7.9640699999999995	15	7.416911807230531	2020-05-27	CHX			90.36799	7.497319999999999	15	8.296433283511119	2020-05-27	Ctrl
94.76013	7.56123	15	7.979336879339444	2020-05-27	CHX			87.39394	7.67025	15	8.77663828865022	2020-05-27	Ctrl
143.3851	11.0912	15	7.735252826130471	2020-05-27	CHX			95.25685	7.37447	15	7.741668971837721	2020-05-27	Ctrl
89.74895	8.16871	15	9.101733223619888	2020-05-27	CHX			107.7741	8.40008	15	7.794154625276389	2020-05-27	Ctrl
97.06130999999999	6.05888	15	6.242322507289465	2020-05-27	CHX			91.5269	6.90527	15	7.544525161455265	2020-05-27	Ctrl
122.93798000000001	9.31548	15	7.57738170091944	2020-11-12	CHX			102.68178	7.764069999999999	15	7.5612927629419735	2020-05-27	Ctrl
102.37676	9.19515	15	8.98167709155867	2020-11-12	CHX			84.42029000000001	7.19768	15	8.526007195663507	2020-05-27	Ctrl
108.83928999999999	8.326130000000001	15	7.649930461692649	2020-11-12	CHX			109.72146000000001	8.61265	15	7.849558327058352	2020-05-27	Ctrl
120.74852	9.798910000000001	15	8.115138802529422	2020-11-12	CHX			98.07727	8.551110000000001	15	8.718747983095371	2020-05-27	Ctrl
91.72764000000001	7.49715	15	8.173272527233884	2020-11-12	CHX			100.28031999999999	9.41859	15	9.392261612248546	2020-05-27	Ctrl
110.69745	9.03463	15	8.16155205020531	2020-11-12	CHX			96.51524	7.54749	15	7.819998168164944	2020-05-27	Ctrl
88.40233	7.43532	15	8.410773788428427	2020-11-12	CHX			103.05258	8.172139999999999	15	7.930068320463203	2020-05-27	Ctrl
89.26576999999999	7.459639999999999	15	8.356663478061076	2020-11-12	CHX			116.94207	10.06226	15	8.6044825442204	2020-05-27	Ctrl
94.66011	8.154910000000001	15	8.61493822477071	2020-11-12	CHX			110.77694	8.38946	15	7.573290975540576	2020-11-26	Ctrl
84.07026	6.10657	15	7.263650665526667	2020-11-12	CHX			140.29766999999998	11.62128	15	8.283302210222026	2020-11-26	Ctrl
87.05414	7.6822	15	8.824623389536672	2020-11-12	CHX			91.85161	6.89325	15	7.5047677444086185	2020-11-26	Ctrl
107.62454	9.08995	15	8.445982672725012	2020-11-12	CHX			90.58627	7.461239999999999	15	8.236612457936506	2020-11-26	Ctrl
100.11148	9.404860000000001	15	9.394387137219429	2020-11-12	CHX			119.37866000000001	9.123460000000001	15	7.642454689975579	2020-11-26	Ctrl
113.083	9.445739999999999	15	8.352926611427003	2020-11-12	CHX			110.83216000000002	9.610610000000001	15	8.67131886629296	2020-11-26	Ctrl
104.55605	8.725810000000001	15	8.345581150014754	2020-11-12	CHX			128.21341999999999	9.98625	15	7.788771253430414	2020-11-26	Ctrl
109.73213999999999	9.914639999999999	15	9.03531089432868	2020-11-12	CHX			130.50342	10.69137	15	8.192405992118827	2020-11-26	Ctrl
105.68001000000001	9.257639999999999	15	8.760067301280534	2020-11-12	CHX			138.1301	10.464210000000001	15	7.575618927373542	2020-11-26	Ctrl
119.86841000000001	9.581	15	7.992931582224206	2020-11-12	CHX			118.84523999999999	9.79732	15	8.24376306531082	2020-11-26	Ctrl
119.73813	9.03702	15	7.54732013937415	2020-11-12	CHX			106.75573999999999	8.94232	15	8.376430157291779	2020-11-26	Ctrl
100.44584	8.48723	15	8.44955848843516	2020-11-12	CHX			110.78307	8.42713	15	7.606875310460344	2020-11-26	Ctrl
107.73386	8.83032	15	8.19642032690558	2020-11-12	CHX			109.22278	8.88466	15	8.134438621686794	2020-11-26	Ctrl
129.03655	10.52592	15	8.157316667254355	2020-11-12	CHX			108.93027	8.57273	15	7.869924493898712	2020-11-26	Ctrl
138.24951000000001	9.52897	30	6.892588624726408	2020-05-27	CHX			105.68958	8.3147	15	7.867095318195038	2020-11-26	Ctrl
101.17295	8.391	30	8.293718825041674	2020-05-27	CHX			122.85003	8.24757	15	6.713527054083747	2020-11-26	Ctrl
99.13661	7.77814	30	7.845880548063929	2020-05-27	CHX			108.36805	8.70173	15	8.029792914055388	2020-11-26	Ctrl
119.12928000000001	8.324060000000001	30	6.987417367082215	2020-05-27	CHX			120.98926999999999	9.54796	15	7.891575839741821	2020-11-26	Ctrl
115.56061000000001	8.56594	30	7.4125084663364085	2020-05-27	CHX			122.14648000000001	9.446439999999999	15	7.733698097562859	2020-11-26	Ctrl
100.96486	7.43417	30	7.363126141114839	2020-05-27	CHX			191.40928	10.70738	15	5.593971201396297	2020-11-26	Ctrl
98.04446999999999	8.0807	30	8.241872285096754	2020-05-27	CHX			0.0	9.89733	15	inf	2020-11-26	Ctrl
105.46008	7.45741	30	7.071310774655205	2020-05-27	CHX			95.05541	7.42318	15	7.809318796268409	2020-11-26	Ctrl
101.48494000000001	7.23265	30	7.126820984473164	2020-05-27	CHX			93.45251999999999	7.17535	15	7.678070104476584	2020-11-26	Ctrl
101.98218	7.4497100000000005	30	7.304913466254595	2020-05-27	CHX			97.90736	7.425439999999999	15	7.584148934257852	2020-11-26	Ctrl
130.46098	9.98734	30	7.655423100455017	2020-05-27	CHX			114.87621999999999	9.03081	30	7.861339796870058	2020-05-27	Ctrl
119.70608	8.382819999999999	30	7.002835612025721	2020-05-27	CHX			121.66673999999999	9.76249	30	8.023959547202466	2020-05-27	Ctrl
133.9709	10.19877	30	7.6126755885046675	2020-05-27	CHX			107.40791999999999	8.96388	30	8.345641550455497	2020-05-27	Ctrl
94.01494	7.1757100000000005	30	7.632520958902916	2020-05-27	CHX			108.97636999999999	8.40827	30	7.715681849193546	2020-05-27	Ctrl
92.08344	7.13962	30	7.753424502820486	2020-05-27	CHX			110.13378	7.92365	30	7.194568278687973	2020-05-27	Ctrl
104.15785	8.07592	30	7.753539459579859	2020-05-27	CHX			110.45326999999999	7.65153	30	6.927391103948304	2020-05-27	Ctrl
102.32996	7.73225	30	7.556193709056467	2020-05-27	CHX			104.23991	8.63162	30	8.280532859247481	2020-05-27	Ctrl
124.8962	9.22892	30	7.389272051511576	2020-05-27	CHX			107.72571	8.000810000000001	30	7.427019975083015	2020-05-27	Ctrl
110.4993	9.1091	30	8.243581633548809	2020-05-27	CHX			123.21556000000001	9.93442	30	8.062634297161818	2020-05-27	Ctrl
105.72762	7.298960000000001	30	6.903550841303342	2020-05-27	CHX			112.06928	10.34465	30	9.230584866789542	2020-05-27	Ctrl
97.83546	7.505260000000001	30	7.6713085419131275	2020-05-27	CHX			99.85387	7.8373800000000005	30	7.848849523809143	2020-05-27	Ctrl
87.61876	7.52022	30	8.582887956871337	2020-05-27	CHX			107.86992	8.275910000000001	30	7.672120272268675	2020-05-27	Ctrl
97.29143	8.27565	30	8.50604210463347	2020-05-27	CHX			102.97941	8.491769999999999	30	8.24608530967501	2020-05-27	Ctrl
108.19313999999999	8.76817	30	8.104182945425192	2020-05-27	CHX			120.96432	8.6077	30	7.11589996124477	2020-05-27	Ctrl
109.36763	7.986039999999999	30	7.302014316301815	2020-05-27	CHX			118.6088	8.72614	30	7.357076372073572	2020-05-27	Ctrl
99.11553	7.51762	30	7.584704435319066	2020-05-27	CHX			117.15813999999999	8.6792	30	7.40810668383776	2020-05-27	Ctrl
151.39979	11.76863	30	7.773214216479429	2020-05-27	CHX			102.38374	8.58713	30	8.38720093639869	2020-05-27	Ctrl
92.75263000000001	8.15435	30	8.791502731512843	2020-05-27	CHX			109.32927	8.31329	30	7.603901498656308	2020-05-27	Ctrl
100.05708	6.37726	30	6.37362193659859	2020-05-27	CHX			99.3483	7.86825	30	7.919863752072255	2020-05-27	Ctrl
129.14254	10.52995	30	8.153742368703604	2020-11-12	CHX			98.60858	7.479189999999999	30	7.584725385965398	2020-05-27	Ctrl
107.59791000000001	9.73821	30	9.050556837024065	2020-11-12	CHX			98.93471	8.11097	30	8.198305731123082	2020-05-27	Ctrl
114.93195	9.60672	30	8.358615685194586	2020-11-12	CHX			103.61799	8.16831	30	7.883100222268353	2020-05-27	Ctrl
126.83778999999998	9.82437	30	7.7456174535995945	2020-11-12	CHX			111.76597	9.48728	30	8.488522937706353	2020-05-27	Ctrl
100.58618	7.93637	30	7.890119696363855	2020-11-12	CHX			97.87803000000001	8.02557	30	8.199562251099659	2020-05-27	Ctrl
119.21978999999999	8.799430000000001	30	7.380846753714296	2020-11-12	CHX			109.67545	8.63074	30	7.869345418687591	2020-05-27	Ctrl
92.56898000000001	7.09588	30	7.665505226480835	2020-11-12	CHX			91.39047	7.4924	30	8.198228983831685	2020-05-27	Ctrl
96.44697	7.03671	30	7.295936824142843	2020-11-12	CHX			117.68276999999999	10.0287	30	8.521808247715448	2020-05-27	Ctrl
100.6823	8.40818	30	8.35119976401016	2020-11-12	CHX			107.65236000000002	9.065380000000001	30	8.420976558247306	2020-05-27	Ctrl
87.84754000000001	5.67095	30	6.455445422831419	2020-11-12	CHX			107.57091000000001	9.416319999999999	30	8.753593327415373	2020-05-27	Ctrl
89.34995	7.864889999999999	30	8.802344041602709	2020-11-12	CHX			104.15841999999999	8.63764	30	8.292790923671845	2020-05-27	Ctrl
114.37398	8.17801	30	7.150236443638667	2020-11-12	CHX			111.15178999999999	9.06357	30	8.154227655712969	2020-05-27	Ctrl
109.30325	8.80848	30	8.05875397117652	2020-11-12	CHX			126.33901000000002	10.395769999999999	30	8.228471950191787	2020-05-27	Ctrl
123.30748	9.46536	30	7.676225319015522	2020-11-12	CHX			114.65227	8.9325	30	7.790949102010801	2020-11-26	Ctrl
113.76213999999999	8.3797	30	7.365983094199882	2020-11-12	CHX			149.48426	11.69993	30	7.826864179546394	2020-11-26	Ctrl
118.32907	9.715160000000001	30	8.210290167919007	2020-11-12	CHX			97.19803	8.37548	30	8.616923614604122	2020-11-26	Ctrl
107.77734	9.305819999999999	30	8.634301050666123	2020-11-12	CHX			97.18942	8.10673	30	8.34116511859007	2020-11-26	Ctrl
125.58728	10.10855	30	8.049023754635023	2020-11-12	CHX			128.08491	10.329410000000001	30	8.064501899560222	2020-11-26	Ctrl
124.99223	9.6203	30	7.696718428017485	2020-11-12	CHX			119.51305	9.60374	30	8.035724968946905	2020-11-26	Ctrl
101.21329	8.34812	30	8.248047267310449	2020-11-12	CHX			134.73155	10.645669999999999	30	7.901393548875523	2020-11-26	Ctrl
110.81086	9.1193	30	8.229608541978648	2020-11-12	CHX			141.15989	11.47688	30	8.130411549626455	2020-11-26	Ctrl
137.9253	11.304269999999999	30	8.195936496059824	2020-11-12	CHX			152.26573	11.10026	30	7.290057979559814	2020-11-26	Ctrl
147.39113	10.13747	45	6.877937634374606	2020-05-27	CHX			131.8854	9.81628	30	7.443037667550768	2020-11-26	Ctrl
107.44254	8.4414	45	7.856664594861589	2020-05-27	CHX			115.77625	8.92804	30	7.711460683862191	2020-11-26	Ctrl
98.99407	8.039810000000001	45	8.12150667206632	2020-05-27	CHX			115.4846	9.85724	30	8.535544999073469	2020-11-26	Ctrl
121.93184	9.24072	45	7.578594729645678	2020-05-27	CHX			117.58701	8.84522	30	7.522276482750942	2020-11-26	Ctrl
120.55925	8.472710000000001	45	7.027839008620243	2020-05-27	CHX			119.62042	9.92712	30	8.298850647740577	2020-11-26	Ctrl
102.81681999999999	7.722980000000001	45	7.511397454229766	2020-05-27	CHX			113.76032	8.83532	30	7.766609657919386	2020-11-26	Ctrl
100.47657	8.90288	45	8.860652787012933	2020-05-27	CHX			132.15649	8.9217	30	6.7508602869219665	2020-11-26	Ctrl
112.66317	8.364469999999999	45	7.424316216204461	2020-05-27	CHX			114.30291000000001	9.151489999999999	30	8.006349094699337	2020-11-26	Ctrl
103.87799	7.44717	45	7.169151039599438	2020-05-27	CHX			128.86681000000002	10.645	30	8.260466756335475	2020-11-26	Ctrl
104.89425	7.442410000000001	45	7.095155358849509	2020-05-27	CHX			130.98635	10.00806	30	7.640536590263032	2020-11-26	Ctrl
137.71606	10.72959	45	7.7910956790369985	2020-05-27	CHX			162.9845	11.02631	30	6.76525068334719	2020-11-26	Ctrl
125.78598000000001	9.38733	45	7.46293823842689	2020-05-27	CHX			142.91173	10.63825	30	7.443930599678556	2020-11-26	Ctrl
137.56996	9.80432	45	7.126788435498564	2020-05-27	CHX			98.99385	7.948010000000001	30	8.02879168756443	2020-11-26	Ctrl
99.09052	7.6819	45	7.752406587431371	2020-05-27	CHX			99.80766	7.71842	30	7.733294218099092	2020-11-26	Ctrl
94.56576	6.9885399999999995	45	7.390137825783877	2020-05-27	CHX			105.3211	8.34753	30	7.925790748482498	2020-11-26	Ctrl
107.47798	8.10567	45	7.541702960922787	2020-05-27	CHX			124.238	9.6773	45	7.789323717381156	2020-05-27	Ctrl
106.08238999999999	8.07599	45	7.612941224269174	2020-05-27	CHX			134.77372	10.45722	45	7.759094280398285	2020-05-27	Ctrl
131.41257	9.55447	45	7.270590629191713	2020-05-27	CHX			115.6609	10.02975	45	8.671685937079861	2020-05-27	Ctrl
115.86148	9.243960000000001	45	7.9784584143064645	2020-05-27	CHX			116.80208999999999	8.794189999999999	45	7.529137535124585	2020-05-27	Ctrl
106.91226	7.612830000000001	45	7.1206333118390726	2020-05-27	CHX			118.37751000000002	8.878110000000001	45	7.499828303535021	2020-05-27	Ctrl
99.0747	7.42425	45	7.493588171349496	2020-05-27	CHX			121.23845	8.40508	45	6.932685134130303	2020-05-27	Ctrl
90.27396	7.54541	45	8.358346083410986	2020-05-27	CHX			115.11373999999999	9.43672	45	8.197735561367391	2020-05-27	Ctrl
103.37254	8.35026	45	8.077831888429944	2020-05-27	CHX			117.42228999999999	9.215489999999999	45	7.848160685675607	2020-05-27	Ctrl
110.92313	7.8219899999999996	45	7.0517213136701065	2020-05-27	CHX			116.75802	9.615910000000001	45	8.235759736247669	2020-05-27	Ctrl
112.11849	7.652830000000001	45	6.8256627430497865	2020-05-27	CHX			109.02761000000001	9.0091	45	8.263136282635196	2020-05-27	Ctrl
99.83388000000001	7.762	45	7.774915689944134	2020-05-27	CHX			116.15586	9.02848	45	7.772728814542804	2020-05-27	Ctrl
159.25328000000002	12.145769999999999	45	7.626700059176173	2020-05-27	CHX			113.81328	8.77815	45	7.712764274959829	2020-05-27	Ctrl
94.20537	8.258460000000001	45	8.766442932074892	2020-05-27	CHX			132.77358999999998	10.04238	45	7.5635372968374215	2020-05-27	Ctrl
103.27783000000001	6.54828	45	6.340450801493408	2020-05-27	CHX			129.90216999999998	9.35197	45	7.19924078250579	2020-05-27	Ctrl
133.91564	11.30045	45	8.438484108353588	2020-11-12	CHX			128.36694	8.90691	45	6.938632330099947	2020-05-27	Ctrl
111.27313000000001	10.06535	45	9.045624941079666	2020-11-12	CHX			108.2897	9.02604	45	8.335086347085642	2020-05-27	Ctrl
120.44175	9.11307	45	7.566371295667823	2020-11-12	CHX			117.07323999999998	9.364939999999999	45	7.999214850464547	2020-05-27	Ctrl
132.33913	10.8636	45	8.208909942206812	2020-11-12	CHX			107.03401000000001	8.47584	45	7.918828790960928	2020-05-27	Ctrl
103.19929	8.2612	45	8.005093833494398	2020-11-12	CHX			105.58856999999999	8.02887	45	7.603919628800731	2020-05-27	Ctrl
120.83531	8.761339999999999	45	7.250645527371096	2020-11-12	CHX			107.64571000000001	9.07222	45	8.427850956624281	2020-05-27	Ctrl
92.97662	7.314310000000001	45	7.866827165797166	2020-11-12	CHX			113.21455	8.84246	45	7.810356531028919	2020-05-27	Ctrl
99.59163000000001	7.18843	45	7.2179057617592965	2020-11-12	CHX			120.15493000000001	10.449639999999999	45	8.696805033301587	2020-05-27	Ctrl
105.43446999999999	8.95541	45	8.493816111561998	2020-11-12	CHX			106.78171999999999	8.34918	45	7.818922564648706	2020-05-27	Ctrl
94.54396	6.935969999999999	45	7.336238084378949	2020-11-12	CHX			120.33478999999998	9.17716	45	7.626356434411031	2020-05-27	Ctrl
91.23394	8.1665	45	8.95116444603839	2020-11-12	CHX			99.89709	8.61507	45	8.623944901698337	2020-05-27	Ctrl
115.28797	8.65928	45	7.511000497276516	2020-11-12	CHX			126.61596000000002	9.9248	45	7.838506298889964	2020-05-27	Ctrl
113.51671	9.01978	45	7.945772917485012	2020-11-12	CHX			116.95109	9.7548	45	8.340922688279347	2020-05-27	Ctrl
123.61843999999999	9.62155	45	7.783264373826429	2020-11-12	CHX			116.39241000000001	9.80584	45	8.424810518142891	2020-05-27	Ctrl
116.32902	8.69772	45	7.476827364315457	2020-11-12	CHX			112.29563	9.39086	45	8.362622837593948	2020-05-27	Ctrl
118.94546000000001	10.01515	45	8.419951463469054	2020-11-12	CHX			120.02429	9.51953	45	7.931336232024368	2020-05-27	Ctrl
110.42748	9.415460000000001	45	8.526374051096703	2020-11-12	CHX			133.49998	10.96288	45	8.211896361332789	2020-05-27	Ctrl
124.09223999999999	9.80038	45	7.89765741999661	2020-11-12	CHX			126.99758	9.9077	45	7.801487240937977	2020-11-26	Ctrl
125.52593	9.51629	45	7.581134830070568	2020-11-12	CHX			104.44258	8.16493	45	7.817625723148547	2020-11-26	Ctrl
103.51068000000001	8.66858	45	8.374575454436199	2020-11-12	CHX			108.02906000000002	8.51548	45	7.882582705061026	2020-11-26	Ctrl
116.31803000000001	9.33411	45	8.024645878201342	2020-11-12	CHX			137.88851	10.31282	45	7.479100325328049	2020-11-26	Ctrl
138.07276000000002	11.6909	45	8.467202364898043	2020-11-12	CHX			129.00231000000002	10.29545	45	7.9808260797810515	2020-11-26	Ctrl
151.38128	10.20681	60	6.742451906867217	2020-05-27	CHX			144.76169	11.11322	45	7.676906783832105	2020-11-26	Ctrl
110.24356	8.53301	60	7.740143732658852	2020-05-27	CHX			149.82413	11.66484	45	7.785688460196631	2020-11-26	Ctrl
103.42698	7.88628	60	7.624973677081164	2020-05-27	CHX			143.6689	10.35823	45	7.209792794404357	2020-11-26	Ctrl
123.92341	9.25186	60	7.465788748066245	2020-05-27	CHX			124.96618000000001	10.01008	45	8.010231248166503	2020-11-26	Ctrl
124.04031	8.63991	60	6.965405036475642	2020-05-27	CHX			124.59357	9.61955	45	7.720743534357351	2020-11-26	Ctrl
102.42206	7.33166	60	7.158282112271517	2020-05-27	CHX			124.20992	9.70698	45	7.814979673121116	2020-11-26	Ctrl
104.81965	9.15674	60	8.735709382735012	2020-05-27	CHX			129.02806	10.31884	45	7.997361194146451	2020-11-26	Ctrl
115.53936000000002	8.596969999999999	60	7.4407284236298326	2020-05-27	CHX			121.70936999999999	9.3483	45	7.680838377521797	2020-11-26	Ctrl
107.94186	7.7725100000000005	60	7.200644865671205	2020-05-27	CHX			140.99086	9.87076	45	7.000992830315384	2020-11-26	Ctrl
107.19418999999999	7.400519999999999	60	6.903844322159624	2020-05-27	CHX			120.26958	9.24315	45	7.685359839121414	2020-11-26	Ctrl
141.98414	11.02469	60	7.764733441354789	2020-05-27	CHX			138.27773	10.55584	45	7.63379612899344	2020-11-26	Ctrl
133.35368	9.57756	60	7.182074015505234	2020-05-27	CHX			137.22653	10.6527	45	7.762857517420283	2020-11-26	Ctrl
138.58558	10.89377	60	7.860680743263477	2020-05-27	CHX			172.06823	11.76839	45	6.839374125020057	2020-11-26	Ctrl
103.72627	8.06548	60	7.77573511512561	2020-05-27	CHX			157.82802	11.559239999999999	45	7.323946660421894	2020-11-26	Ctrl
97.15456	7.360939999999999	60	7.576525486811941	2020-05-27	CHX			108.3449	8.213289999999999	45	7.580689077196987	2020-11-26	Ctrl
110.89371000000001	8.9476	60	8.068627156580837	2020-05-27	CHX			104.98082	8.23288	45	7.842270616670741	2020-11-26	Ctrl
110.74273000000001	8.15018	60	7.3595621130163575	2020-05-27	CHX			108.29866000000001	8.76914	45	8.097182365875994	2020-11-26	Ctrl
136.09711000000001	9.81292	60	7.210233927818158	2020-05-27	CHX			129.24941	10.06867	60	7.790109061232851	2020-05-27	Ctrl
119.7166	9.58478	60	8.006224700668078	2020-05-27	CHX			146.53802	11.00733	60	7.511586412864047	2020-05-27	Ctrl
108.98705	8.015080000000001	60	7.3541581316312366	2020-05-27	CHX			124.79845	10.06996	60	8.068978420805706	2020-05-27	Ctrl
103.34844	7.69413	60	7.444843869921985	2020-05-27	CHX			125.6747	9.54555	60	7.595442837739021	2020-05-27	Ctrl
92.4276	7.546819999999999	60	8.16511518204519	2020-05-27	CHX			126.9204	9.604410000000001	60	7.567270509705296	2020-05-27	Ctrl
106.21148000000001	8.757610000000001	60	8.245445784203365	2020-05-27	CHX			126.59925	8.71331	60	6.882592116461986	2020-05-27	Ctrl
114.8195	8.85069	60	7.708350933421587	2020-05-27	CHX			121.19712	9.9624	60	8.219997306866698	2020-05-27	Ctrl
114.30898	7.8575	60	6.873913143131887	2020-05-27	CHX			124.9873	9.89661	60	7.918092478195785	2020-05-27	Ctrl
101.32609000000001	8.13697	60	8.030478625988627	2020-05-27	CHX			123.38586000000001	10.217210000000001	60	8.280697642339245	2020-05-27	Ctrl
163.2822	12.40232	60	7.595635041664064	2020-05-27	CHX			116.12628000000001	9.07887	60	7.818101122329932	2020-05-27	Ctrl
97.06447	8.65707	60	8.918886591561257	2020-05-27	CHX			126.50554	9.61375	60	7.599469556827314	2020-05-27	Ctrl
103.78801	6.51222	60	6.274539804742378	2020-05-27	CHX			119.00469	10.05563	60	8.449776223105157	2020-05-27	Ctrl
138.10763	10.922419999999999	60	7.9086289439620385	2020-11-12	CHX			139.18628	10.68259	60	7.67503090103421	2020-05-27	Ctrl
117.52303	10.26173	60	8.731675825580739	2020-11-12	CHX			138.12473	10.047939999999999	60	7.274540916749665	2020-05-27	Ctrl
123.71139	9.79921	60	7.921024895120814	2020-11-12	CHX			133.18896999999998	10.095360000000001	60	7.57972675965585	2020-05-27	Ctrl
135.73198	10.53589	60	7.762275331134195	2020-11-12	CHX			115.38876	8.651660000000001	60	7.497836011063817	2020-05-27	Ctrl
106.7024	8.1164	60	7.606576796773082	2020-11-12	CHX			128.6867	9.99261	60	7.76506818497949	2020-05-27	Ctrl
123.5537	8.86428	60	7.174435083692354	2020-11-12	CHX			113.69037	9.36393	60	8.23634402808259	2020-05-27	Ctrl
93.57887	7.6223	60	8.145321694951008	2020-11-12	CHX			113.89133000000001	8.63795	60	7.584378898727409	2020-05-27	Ctrl
100.61828	7.702660000000001	60	7.655328634120957	2020-11-12	CHX			118.10479	10.05995	60	8.517817101236963	2020-05-27	Ctrl
109.45215	9.45145	60	8.635234666472975	2020-11-12	CHX			124.03101000000001	9.36178	60	7.547934988193678	2020-05-27	Ctrl
95.71273000000001	7.06349	60	7.379885622320039	2020-11-12	CHX			134.7718	10.98663	60	8.152024384923255	2020-05-27	Ctrl
96.04815	8.352139999999999	60	8.69578435399328	2020-11-12	CHX			115.40144	9.32966	60	8.084526501575718	2020-05-27	Ctrl
126.71486999999999	9.07505	60	7.1617877207308025	2020-11-12	CHX			128.2802	9.96354	60	7.767013147781185	2020-05-27	Ctrl
117.21408000000001	9.419410000000001	60	8.036073823213048	2020-11-12	CHX			107.12265	9.32271	60	8.702837355125178	2020-05-27	Ctrl
128.36388	9.89412	60	7.707869223024421	2020-11-12	CHX			135.34068	10.6826	60	7.893118314463915	2020-05-27	Ctrl
122.25448999999999	8.98197	60	7.346944885214441	2020-11-12	CHX			127.58851000000001	10.67552	60	8.3671484211235	2020-05-27	Ctrl
127.26261000000001	9.978480000000001	60	7.840857577885602	2020-11-12	CHX			126.18574	10.739889999999999	60	8.511175668502636	2020-05-27	Ctrl
113.48912	9.945969999999999	60	8.763809253257051	2020-11-12	CHX			124.00258000000001	9.776060000000001	60	7.8837553218650775	2020-05-27	Ctrl
130.83351000000002	9.66237	60	7.385240982986697	2020-11-12	CHX			128.02646000000001	10.0721	60	7.867201826872351	2020-05-27	Ctrl
130.30597	9.78219	60	7.5070927295196075	2020-11-12	CHX			137.92305	10.99186	60	7.969559837895118	2020-05-27	Ctrl
107.48761999999999	8.59745	60	7.998549042205977	2020-11-12	CHX			132.35233	10.07294	60	7.610700922303369	2020-11-26	Ctrl
119.46545	9.366589999999999	60	7.840417459608614	2020-11-12	CHX			110.08713999999999	9.3607	60	8.502991357573645	2020-11-26	Ctrl
145.3126	11.70545	60	8.055357897388115	2020-11-12	CHX			120.41713999999999	9.406360000000001	60	7.811479329271565	2020-11-26	Ctrl
								146.34066	10.33597	60	7.062951608937666	2020-11-26	Ctrl
								137.6135	11.21274	60	8.147994201150325	2020-11-26	Ctrl
								159.24472	12.37883	60	7.773463383903717	2020-11-26	Ctrl
								150.96868999999998	11.250860000000001	60	7.45244593431923	2020-11-26	Ctrl
								131.1849	10.23338	60	7.800730114517754	2020-11-26	Ctrl
								133.00143	10.586780000000001	60	7.9598993785254795	2020-11-26	Ctrl
								132.48909	9.953439999999999	60	7.512648777344609	2020-11-26	Ctrl
								137.49313999999998	11.13611	60	8.099393176997777	2020-11-26	Ctrl
								128.71952	9.7061	60	7.54050356931101	2020-11-26	Ctrl
								153.07755	11.11185	60	7.258967758498878	2020-11-26	Ctrl
								130.84601	10.355139999999999	60	7.913989887807812	2020-11-26	Ctrl
								144.93225	12.10217	60	8.350225708908816	2020-11-26	Ctrl
								147.48609	11.27818	60	7.646944874598005	2020-11-26	Ctrl
								182.98427	12.996210000000001	60	7.102364591229618	2020-11-26	Ctrl
								163.40823999999998	12.9644	60	7.933749240552375	2020-11-26	Ctrl
								116.2226	8.60995	60	7.408154696246685	2020-11-26	Ctrl
								113.20127	8.83367	60	7.803507858171556	2020-11-26	Ctrl
								116.80963	9.275739999999999	60	7.940903502562245	2020-11-26	Ctrl
