# Supplementary material for: Control of nuclear size by osmotic forces in Schizosaccharomyces pombe
Source: eLife. 2022 Jul 20;11:e76075. doi: 10.7554/eLife.76075 (PMC9410708; doi:10.7554/eLife.76075)
Supplement: Figure 6—source data 2. — Related to Figure 6F. [file elife-76075-fig6-data2.xlsx]

## Sheet: Sheet1
Nuclear GEMs	0 min	15 min	30 min	60 min		Nuclear GEMs	0 min	15 min	30 min	60 min		Cytoplasmic GEMs	0 min	15 min	30 min	60 min		Cytoplasmic GEMs	0 min	15 min	30 min	60 min
CHX	0.710959	0.326898	1.2227			Ctrl	0.147344	0.0325203	0.701932			CHX	0.462094	0.770305	0.901045			Ctrl	0.0505479	0.332344	1.08591
	0.745273	0.582965	0.374268				0.71069	0.258187	0.521608				2.67166	0.860838	1.15512				0.14594	2.3848	1.82348
	0.384439	0.279748	0.484232				0.288225	0.250662	0.574445				0.419265	0.553563	0.354526				0.412872	0.130608	0.563677
	0.313752	1.34372	0.92534				0.301532	0.187472	0.673337				0.476415	0.0938877	0.299949				0.301259	0.662495	0.0582594
	0.753807	0.2572	0.293756				0.501354	1.18098	0.632254				0.768635	0.170009	0.355612				0.451333	0.418852	0.32489
	0.54003	1.21982	0.356581				0.355437	0.189229	0.62066				0.398865	0.429835	1.59389				0.169098	0.222668	0.0171715
	0.204726	0.823283	1.15418				0.592122	0.25721	0.455788				0.916401	1.06039	0.419525				0.166574	1.35885	0.0994505
	1.41361	0.272221	1.52838				0.938907	0.020484	0.345044				0.088903	0.0600225	0.217783				0.260205	0.233977	0.0740198
	0.577722	1.72549	1.48412				0.401684	0.319276	0.247268				0.90343	0.671319	0.120415				0.335092	0.318709	0.0840763
	0.523438	1.21119	0.793706				0.192286	0.224183	0.443931				0.796893	0.994984	0.637969				0.407334	0.0849406	0.156321
	0.384249	1.03846	0.304111				0.41233	1.55444	0.184379				0.0824238	0.64323	0.285517				0.396503	0.678378	0.76419
	0.548029	0.324016	2.0119				0.0840806	0.322439	0.11157				0.671458	0.389724	0.531764				0.273164	1.09455	0.185344
	1.86024	0.247567	1.19077				0.33804	0.189806	0.341386				0.10902	0.537515	0.943688				0.816311	0.475816	0.49649
	0.521547	0.335141	0.872953				0.79613	0.578374	0.305129				0.556625	0.305723	1.72552				0.438262	0.151102	0.107642
	0.59897	0.494764	0.247503				0.588463	0.441739	0.748889				0.212433	1.67382	0.0594958				0.237707	0.479671	0.871052
	0.955462	1.33441	0.318351				0.421863	0.385233	0.261819				0.65121	0.414868	0.23346				0.238317	0.599065	0.318548
	0.272683	0.459206	1.25632				0.150839	0.572936	0.43652				0.287342	0.382334	1.19272				0.0684183	1.31024	0.840537
	0.603458	0.234639	0.303329				0.347034	0.338656	0.175589				0.836716	0.694065	0.835457				0.491059	0.24949	0.312137
	0.80872	0.58016	0.393615				0.132779	0.244358	0.394123				0.0926761	0.221425	0.696934				0.162551	0.640692	0.239395
	0.57952	0.638375	0.528965				0.448378	0.34568	0.109101				0.138876	1.78746	0.391238				0.326816	0.354667	0.613172
	0.346451	0.513916	2.46262				0.39143	0.423844	0.233324				0.33515	0.386894	0.336398				0.30081	0.314069	0.459651
	0.482646	1.0313	2.05492				0.176651	0.655292	0.551439				0.836187	0.207921	0.444065				0.285791	0.224312	0.484482
	0.346366	2.37667	0.185697				0.403058	0.268261	0.856116				0.365243	2.9259	0.297138				0.0858035	0.31836	0.714444
	0.657198	0.643712	0.477307				0.0970635	0.268466	0.361042				0.249596	0.250574	0.626344				0.400661	0.341039	0.370919
	0.664585	0.877542	0.0695227				0.986271	0.409899	0.260669				0.103078	0.183964	1.26672				0.22832	1.1302	1.47023
	0.723913	1.10266	0.122966				0.325734	0.39855	0.909712				1.02538	0.943557	0.753953				0.137702	0.589468	0.305965
	0.537565	0.195258	0.999081				0.238823	0.146135	0.591876				0.254656	0.652579	0.686238				0.610344	0.0882317	0.190894
	0.553678	0.207309	0.363232				0.481741	0.191103	0.525835				0.706419	0.772684	0.274484				0.177482	0.750784	0.447725
	0.640466	0.231073	0.509304				0.851397	0.229551	0.0947776				0.317136	0.583009	0.403832				0.431006	0.901998	0.175213
	1.14218	0.221182	0.0337516				0.698514	0.854712	0.274276				0.113468	0.414279	0.281385				0.521554	0.419779	0.121961
	0.299854	1.22834	1.62157				0.379427	0.288982	0.696968				0.40527	0.425671	0.0519621				0.541543	0.389252	0.227243
	0.470311	0.766026	0.899337				0.265583	0.197026	0.203406				0.29854	0.447477	0.410487				0.127843	0.0553603	0.470934
	0.668933	0.409005	0.809485				0.423057	0.0691935	0.0324021				0.641925	0.481353	0.497361				0.150317	0.767625	0.253766
	1.23029	0.166905	1.20222				0.0974265	0.293496	0.157991				1.25153	0.962781	0.242372				0.207865	1.51246	0.985114
	0.478608	0.185022	0.558474				0.689784	0.143018	0.463994				0.243695	0.453365	0.178536				0.0244201	0.465026	0.191051
	0.216766	0.271702	0.306748				0.0455627	1.19625	0.24439				0.401068	1.4057	0.487216				0.546527	0.702761	0.0699934
	0.631532	0.591393	0.779347				0.165556	0.836693	0.357299				0.146457	0.27399	0.628477				0.357114	0.148345	0.717765
	0.294662	0.575249	3.53392				0.703183	0.837206	0.302816				0.198155	0.720841	0.171812				0.186834	1.06538	0.0484819
	0.654672	0.835794	0.583031				0.162436	0.536086	0.888239				0.501036	0.343956	0.818814				0.424485	0.227416	0.102227
	0.229679	0.458765	1.17027				0.19106	0.633038	0.274139				1.03338	0.382796	0.216456				0.452999	0.182173	0.522555
	0.623438	0.424565	2.17603				0.544822	1.02171	0.248084				0.827658	1.78342	0.676496				0.209644	0.692817	0.802139
	0.717076	0.0897731	1.03446				0.602642	0.668068	0.303574				0.267773	1.23912	0.0862795				0.336195	1.13661	0.280935
	0.397489	0.797065	0.326185				0.622322	0.399996	0.0841524				0.0605913	0.553215	0.446874				0.0908508	0.33251	0.326196
	0.534159	0.688541	0.422349				0.809994	0.545254	0.46757				0.779495	1.45693	1.20171				0.36952	0.707579	0.820356
	0.480214	1.267	0.393882				0.446438	0.646966	0.87465				1.07728	0.776656	0.612611				1.50695	0.514034	0.0614662
	1.74852	0.422712	0.483611				0.506026	0.853842	1.5256				0.31039	0.685899	0.682185				0.123415	0.179792	0.792087
	0.356317	0.3723	0.120086				0.746875	0.898651	1.16892				0.0670001	0.35138	0.621865				0.543413	0.411476	0.439386
	0.461754	0.332212	0.361899				1.39007	0.53993	0.271919				0.325823	0.0652795	3.68597				0.473843	0.224795	0.846813
	0.801826	0.968763	0.348357				0.222798	0.908616	0.500319				0.642347	0.333328	0.181776				0.28527	0.607986	0.132182
	0.42052	0.0683703	0.649318				0.456278	0.557207	0.117136				0.0549988	0.478182	0.394233				0.292378	0.19101	1.08821
	0.84276	0.0295687	0.671911				0.452586	0.60693	0.196048				0.783454	0.186533	0.453441				0.239157	0.372019	0.443639
	0.667905	0.157722	0.283182				0.753732	0.588943	1.01126				0.529688	0.818304	3.00844				0.412694	0.584042	0.273431
	0.344817	0.519666	1.73394				0.310367	0.485128	0.970645				0.149122	0.292359	1.63066				0.508867	0.383038	0.897715
	0.540517	0.304153	1.2263				0.300779	0.452393	0.795851				0.532119	0.361763	0.28633				0.163726	0.405284	0.0320662
	1.1209	0.155748	0.898029				0.668766	1.36021	0.603416				1.17859	0.520892	1.60396				0.323024	0.867449	0.578218
	0.410396	0.161759	0.76307				0.0774255	0.336359	0.794028				0.529705	0.788647	0.563136				0.241223	0.51893	1.11803
	1.46033	0.606426	0.476178				0.480457	0.56268	0.673643				0.299866	1.22915	0.444152				0.433902	0.404221	0.268885
	0.637884	0.595213	1.19173				0.339564	1.05084	0.172245				0.32112	0.462833	0.49605				0.307156	0.0874322	0.467451
	0.983661	0.563773	0.698142				0.43274	0.372615	0.307058				0.477764	0.515518	0.0941279				0.11414	0.213725	0.713691
	0.240067	0.444887	0.725708				0.576141	0.540549	1.26296				0.0529978	0.216864	0.225236				0.660199	0.699224	0.2144
	0.499263	0.327489	1.24078				0.193835	0.908932	0.413616				0.349079	0.960538	0.375056				0.242542	0.413688	0.746607
	0.420005	0.471214	1.64777				0.557024	0.105567	1.64797				0.439026	0.114227	1.32705				1.30864	0.505305	0.339721
	0.604807	0.586258	0.587705				0.348693	0.59614	0.671222				0.338178	1.32172	0.577782				0.181884	0.495824	0.271415
	0.492369	0.336308	0.114367				1.08197	0.298136	0.75651				0.638187	1.12132	0.477863				0.802648	0.947309	0.715613
	0.161787	0.81242	0.354459				0.331148	0.534692	0.427712				0.0616382	0.355056	0.51519				0.12353	0.662896	0.274547
	0.494333	0.228739	0.824047				0.378325	0.533922	0.987746				0.204371	1.07742	0.332634				0.16003	0.665737	0.2239
	0.379169	0.158469	0.798808				0.401582	1.09247	0.534105				0.330762	0.393977	1.61406				0.939295	0.377528	0.240331
	0.510654	0.17486	0.907726				0.549202	0.501949	1.50464				0.38642	0.493837	0.305192				0.659696	0.202337	0.770989
	0.472955	0.106683	0.897747				0.272068	0.435572	0.329055				0.18803	0.648583	0.505727				0.319666	0.411174	0.147624
	0.579056	0.0708888	0.26907				1.02927	0.314108	0.578223				0.284273	0.40542	0.26735				0.381717	0.335073	0.29715
	0.382442	1.37818	0.563351				0.85976	0.166208	0.745126				0.856004	0.486912	0.494649				0.308629	0.408063	0.188104
	0.230489	0.194665	0.509471				0.276988	0.313694	0.815591				0.455798	0.248327	0.114603				1.78292	0.352924	0.262833
	0.498222	0.974314	0.464568				0.541807	0.423637	0.375707				0.79312	0.13058	0.625759				0.396962	0.541501	0.118478
	0.99929	0.254557	0.89981				0.778362	0.829067	0.858882				0.259815	0.445844	0.219317				0.675786	0.0803093	0.336792
	0.648464	0.14916	0.361735				2.45768	0.592339	0.453105				0.0643312	1.14911	0.324621				0.987306	1.86126	0.178586
	1.12214	0.319441	0.737252				1.07409	0.998384	0.329834				0.119454	0.465743	1.63864				1.61509	0.150769	0.847452
	1.19537	1.10118	0.735638				0.324021	1.30736	1.2846				0.387258	0.0775033	0.26412				0.0915249	0.267595	0.511095
	0.843488	0.204041	0.300998				0.118142	0.818182	0.515345				0.173744	0.664045	2.12721				0.207691	0.153599	0.622616
	0.966225	0.357206	0.329321				1.11717	0.411702	0.21843				0.449663	0.563325	0.39107				0.288887	0.364712	0.549157
	0.350434	1.83731	0.496808				0.197284	1.15337	0.42126				0.210127	0.141197	0.145612				0.241599	0.487048	0.512903
	0.733372	0.836178	0.389287				0.244779	0.679331	0.407274				0.247084	0.17942	0.15476				0.601875	0.521906	0.466975
	0.343394	0.111986	0.299706				0.502717	1.31807	1.23884				0.245787	1.52704	1.00944				0.666951	0.55716	0.652007
	0.611482	0.513078	1.77058				0.367185	0.794626	0.451786				0.501486	0.227565	0.177726				0.310815	0.186469	0.130074
	0.129575	0.826878	0.388522				0.323185	0.694372	0.719098				0.0734071	0.271458	0.829652				1.11374	0.414014	0.30429
	0.827607	0.8488	0.28696				0.131962	0.490447	0.624666				0.250973	0.579943	1.71238				0.417514	0.108393	0.408217
	0.850464	1.53186	0.669991				1.1441	0.448622	0.636086				0.0764585	0.166523	0.0128061				0.542256	0.96604	0.451134
	0.350776	0.920154	0.808213				0.517963	0.333779	0.401889				0.148773	0.568279	0.439155				0.619582	0.400602	0.129275
	0.841154	0.288931	0.734543				0.552493	0.6503	0.645833				0.464729	0.703654	0.583784				0.520314	0.749594	0.342374
	0.354831	0.0405464	0.772071				0.642629	0.687087	0.587133				1.28034	0.359471	0.008927				0.816378	0.141657	0.618031
	0.275065	0.532919	0.191054				0.179406	0.297422	0.4097				0.244911	0.169532	0.86588				0.256007	0.133753	0.313676
	0.625911	0.0945747	0.261073				0.904194	0.51619	0.315618				0.265013	0.410351	0.218306				0.138794	0.281508	0.170741
	0.381244	1.77061	0.174679				0.368146	0.70524	0.296593				0.499339	0.451374	0.330428				0.514625	0.18849	0.650595
	0.167051	0.406474	0.386371				0.797754	0.192042	0.795222				0.408822	0.908295	0.74064				1.06753	0.129058	0.432576
	0.249315	0.0530904	0.562047				0.3687	1.33381	0.66169				0.39758	1.34201	0.463496				0.54198	0.539885	0.246734
	0.130427	0.653273	1.08506				0.290957	0.370438	0.14994				0.353924	0.365493	0.492718				0.384355	0.44851	0.316691
	0.0892797	0.155113	1.37198				0.383844	0.210951	0.561272				0.591065	0.109083	1.16652				0.17706	0.163908	0.565117
	1.08634	0.483225	1.25416				0.57344	0.426086	0.636205				0.334707	0.0994118	0.301971				1.28052	0.265581	0.389715
	0.29892	0.923514	1.26561				0.46327	0.443337	1.85124				0.206617	1.11472	0.506183				0.382129	0.315146	0.452562
	0.593977	0.495091	0.449379				1.30948	0.262887	0.60997				0.804036	0.218765	0.047351				0.510366	0.414921	0.465555
	0.275346	0.20881	0.426087				1.64547	0.458326	0.31779				0.372671	0.477696	0.368588				0.0764938	0.346019	1.16231
	0.372788	0.50787	0.862454				1.14864	0.438591	0.160606				0.578008	0.64932	1.04901				0.425538	0.191303	0.191271
	0.850372	1.81237	0.44426				0.339603	0.380986	0.168567				0.0311203	0.234253	1.11157				0.0266321	0.379699	0.60703
	1.27713	0.0719277	2.40909				0.503974	0.465051	0.360928				3.35457	0.256841	1.3884				0.154236	0.142313	0.0839808
	0.708363	1.12424	0.244069				0.446749	0.828512	2.26014				0.798607	0.622497	0.185647				0.400701	0.425482	2.20128
	0.398696	1.32029	0.658479				1.01261	0.114851	0.363443				0.478906	0.293903	0.586522				0.168026	0.128989	0.740773
	1.2258	1.21613	0.435305				0.575927	0.323577	0.868576				0.462047	0.923884	0.533613				0.407788	0.215105	0.335173
	0.583137	0.863689	1.55809				0.515109	0.266839	0.352837				0.197624	0.0955027	0.392204				0.461611	0.138953	0.0914893
	0.306481	0.642104	0.964928				0.435162	0.383908	0.480052				0.264189	1.21691	0.336788				0.110147	0.243164	1.62397
	0.710782	0.117741	0.658377				1.96517	0.287094	0.271318				0.351646	0.783833	0.549602				0.337259	0.139006	0.343408
	0.120528	0.561224	0.560889				0.453179	0.499227	0.956486				0.762046	1.21341	0.190248				0.0570062	1.04446	0.0236593
	0.433074	0.656697	0.831845				0.183225	0.171943	0.602164				0.852514	0.658007	0.454341				0.133897	0.200453	0.164356
	0.804865	0.693575	0.916754				0.630931	0.554535	0.717002				0.826736	2.00522	0.204164				0.174905	0.482539	0.1312
	0.549898	0.237519	0.637465				0.391553	0.653961	1.30959				0.0976338	0.791144	0.420834				0.243713	0.124324	0.341141
	0.247495	0.377458	1.48938				0.24214	0.922346	0.745614				0.502628	0.378649	0.319283				0.113783	0.405235	0.374636
	0.0244379	0.560678	0.736435				0.444148	1.98718	0.662916				0.241929	0.493907	0.935729				0.0454447	0.664091	0.233589
	0.235768	0.631892	0.931211				0.911569	0.781203	0.174451				0.44023	0.191041	1.28566				0.220727	0.482652	0.121781
	0.438206	0.260056	1.43058				0.662144	0.699453	0.330623				0.383736	2.04654	2.98528				0.392661	0.509962	0.625654
	0.194923	0.433309	0.646206				1.1572	0.345543	0.996247				0.345451	0.150662	0.625067				0.0874135	0.122014	0.539072
	0.311168	0.554965	0.441771				0.908337	0.635247	0.453345				0.621753	1.25835	0.866888				1.30922	0.117513	0.767692
	0.157211	0.285388	1.1682				1.02954	1.32619	0.551593				0.690806	0.253999	0.294783				0.0930442	0.532333	0.195467
	0.793234	0.841402	1.12318				0.491304	0.42426	0.17144				0.491447	0.298994	0.313977				0.0528917	0.327246	0.608474
	0.499523	0.95501	1.24624				0.76542	0.304329	0.305452				0.859712	0.716366	0.126237				0.156767	0.248906	0.62599
	0.252187	0.269316	0.221199				0.489304	0.240353	0.47255				0.300288	0.324308	0.659168				0.0304271	0.173546	0.380242
	0.683218	0.181693	1.37751				1.15169	0.291474	0.214594				0.380898	0.32368	0.113953				0.210605	0.24063	0.406402
	0.262304	1.15748	1.05488				0.0677631	0.767996	2.50062				0.329856	0.0715387	0.197097				0.315856	0.550843	0.83984
	0.197277	1.03293	0.795272				2.73358	0.299872	1.64108				0.55398	0.116232	0.384487				0.127275	0.365473	0.352922
	0.617057	0.481127	0.280801				0.207679	0.611757	0.377763				0.352013	0.756979	0.583824				0.0553766	0.712978	1.26089
	0.257688	0.800648	0.588267				0.779308	1.42407	0.923054				0.889653	0.647659	0.39195				0.388361	0.392751	0.662613
	0.700499	0.305495	0.742977				0.590276	0.679287	0.592834				0.251383	0.825781	0.357181				0.185829	0.16064	0.378393
	0.337547	0.204248	1.46635				0.0781792	0.155583	0.606085				2.26909	0.352795	0.379765				0.358755	0.269816	0.0928881
	0.455486	0.315405	0.846839				0.57592	0.827133	0.359479				0.433345	0.185483	0.916666				0.224065	0.233201	0.411488
	0.177809	0.305172	0.487441				0.268098	0.241714	0.978968				0.302952	0.288097	0.672896				0.171998	0.406524	0.605279
	0.263492	0.401363	0.927639				0.266988	1.86158	0.736805				0.435942	0.714511	0.898974				0.0573941	0.727162	0.533191
	0.133755	0.532698	0.677017				0.375163	0.228511	0.333935				0.467621	0.266608	1.86219				0.0355661	1.05763	0.473687
	0.365563	0.182567	0.654299				0.569603	0.0502216	1.07178				0.405032	0.230531	0.442436				0.182374	0.449452	0.69911
	0.107384	1.07654	1.28861				0.116192	0.277453	0.807352				0.784575	1.05137	0.28416				0.158832	0.114788	0.343961
	0.197875	0.172393	0.538143				0.208666	1.32403	0.458051				0.404271	0.0667985	0.573335				0.200534	0.953804	0.327753
	0.255494	0.261608	1.95762				0.469594	0.450655	0.40533				0.62887	0.206706	0.772041				0.0970936	0.426218	0.41241
	0.30288	1.78509	0.459702				0.16154	0.834874	0.523134				0.849662	0.279892	0.851261				0.62517	0.219237	0.296092
	0.430932	0.826988	0.682004				0.294646	0.419276	0.664229				0.58264	0.756668	4.02599				0.0471163	0.21189	1.39456
	0.372417	0.730098	0.486582				0.540653	0.374339	0.219592				0.446014	0.242417	0.276841				0.173717	0.596911	0.437602
	0.153778	0.215925	1.03591				0.161671	1.89298	0.439106				0.0953984	0.172498	3.08155				0.140809	0.697415	0.432939
	0.365317	1.07856	0.588815				1.246	0.309718	0.376314				0.696263	0.836704	0.39367				0.170725	0.271655	2.1335
	0.494326	0.0793831	2.33606				0.739122	0.278496	0.301397				0.177241	0.856421	0.797596				0.322405	0.411213	1.03398
	0.90267	0.219538	0.412503				0.738225	0.187384	0.965789				0.105752	0.0855083	0.284029				0.478897	0.366557	0.0341661
	0.279351	0.396821	0.634246				0.353201	0.48893	0.580028				0.203107	0.389722	0.234716				0.154716	0.477986	0.257572
	0.55417	0.151538	0.116902				0.0182238	0.939385	0.431696				0.363665	0.399198	1.5017				0.263722	0.311528	0.338592
	0.498901	2.57724	0.158294				0.426919	0.787186	0.863143				0.119492	0.825342	0.859237				0.657542	0.298346	0.259914
	0.548141	0.375409	0.210768				0.796143	0.605337	0.618668				0.152265	0.360848	0.34704				0.202602	0.129747	0.442528
	0.153005	0.297331	1.25748				0.997812	0.391308	0.147066				0.432488	0.398388	0.709548				0.610992	0.17234	0.138899
	0.36474	0.161085	1.07491				0.273173	0.0881817	0.788933				0.229769	0.234689	1.4342				0.110639	0.155664	0.316858
	0.227205	0.938015	0.190498				0.109179	0.197713	0.396908				0.403994	0.548705	0.952567				0.356904	0.248824	0.239086
	0.392771	0.452982	0.622585				0.617184	0.200711	0.206143				0.19869	0.466247	0.506997				0.222148	0.0167124	0.215648
	0.698452	0.28267	0.213242				0.31352	0.749227	0.87627				0.430279	0.479776	1.16477				0.461444	0.257864	0.516085
	0.129662	0.531727	1.06955				0.338675	0.189541	0.0375399				0.193035	0.734016	1.14529				0.895461	0.338514	0.469616
	0.31459	0.327521	0.704593				0.9597	0.750761	0.349042				0.164435	0.133185	0.0770485				0.118991	0.186746	0.0796585
	0.463088	0.394257	2.05781				0.313802	0.884956	0.114172				0.0943135	0.375534	0.20817				0.267411	0.563274	0.684117
	0.495151	0.361787	0.199294				0.233724	0.368439	0.181118				0.167586	1.05374	0.69519				0.253701	0.532396	0.743376
	0.663985	0.431546	1.02507				0.116403	0.228579	0.414519				0.466946	1.10517	1.3618				0.155298	0.554016	1.0811
	0.312668	0.521784	0.885506				0.217878	0.775789	0.55496				1.24999	0.374571	0.281364				0.21819	0.954725	0.291351
	0.190506	0.606904	0.881845				0.297212	0.710719	1.02459				0.309651	0.71289	0.104223				0.852048	0.245656	0.809079
	0.179695	0.36434	1.09268				1.57471	0.249367	0.178849				0.493922	0.558764	0.590186				0.624119	0.0735571	0.0833483
	0.276699	0.0894516	1.24486				0.268109	0.946089	0.864483				0.227234	0.47015	0.825778				2.35175	0.394867	0.575039
	2.49955	0.500425	0.641096				0.808485	1.37276	0.536895				0.432657	0.203913	0.336445				1.63062	0.25507	0.149989
	0.365781	0.344382	0.240992				0.35889	0.587475	0.279179				0.0790558	0.799215	1.01825				0.938502	0.289974	0.226064
	0.4718	1.21468	1.42842				0.258478	0.683086	0.648917				0.830351	0.473688	1.48269				1.70859	0.119999	0.0919781
	0.766614	0.729547	0.226547				0.53362	0.143396	0.179107				0.12673	0.124399	1.9922				0.511708	0.578619	0.187655
	0.368825	0.41605	0.484746				0.422623	0.382759	0.350121				0.208725	0.199032	2.5637				1.34324	0.313529	0.287047
	0.31557	0.444905	0.556207				0.625759	0.692296	0.596424				0.190115	1.3101	0.491439				0.549174	0.612351	0.300441
	1.05905	0.129097	0.89566				0.136658	0.481507	0.332571				0.214591	0.100552	1.00179				0.193201	0.0845261	0.837482
	0.948761	0.365741	0.689773				0.0367878	0.357391	0.987557				0.319977	0.727043	0.299239				0.186071	0.170116	0.507335
	1.5523	0.679118	0.506507				0.572519	0.890524	0.920221				0.124172	0.689075	0.676354				1.16014	0.252398	0.229639
	0.474578	0.991346	0.712669				0.564233	0.504067	0.231205				0.600987	0.873252	0.392256				3.48381	0.587417	0.200263
	0.474214	0.699446	1.39113				0.503176	0.373766	0.399688				0.15608	0.119032	0.234309				0.977902	0.340667	0.283539
	0.693006	0.721581	0.836291				0.404593	0.146463	0.22847				0.666365	0.205309	0.269262				1.00103	0.540861	0.0472004
	0.214272	0.924253	0.312939				0.107149	1.01564	0.380401				0.331715	0.23984	0.482258				0.326118	0.383001	0.0586998
	0.290987	0.369104	0.456389				0.34662	1.93891	0.21379				0.173154	0.251726	0.617775				0.639614	0.273021	0.309296
	0.546608	0.703205	0.345916				0.0495964	0.203634	0.30675				0.271894	0.164437	0.598453				0.477187	0.507473	0.2274
	0.877628	0.417847	0.819935				0.469106	1.20014	0.34278				0.195092	0.939372	0.144062				0.832097	0.224311	0.26016
	0.316018	0.11246	1.76565				0.0889286	0.305182	0.437715				0.154412	0.425353	0.0928569				0.888254	0.306312	1.2535
	0.408391	0.442276	1.17043				0.36143	0.283427	0.589802				0.38248	0.263539	1.06602				0.416045	0.199246	0.260093
	0.221204	0.443835	1.014				0.355003	0.274776	0.624123				0.808655	0.136779	1.85317				0.545067	0.231546	0.853672
	0.149466	1.68866	0.704746				0.256397	0.335225	0.540573				0.436788	0.0417988	0.141102				1.27433	1.23102	0.0227024
	0.444724	0.412863	0.168554				0.0518908	0.230275	0.438895				0.592866	0.959026	0.752517				0.437886	0.437271	0.0250633
	0.428586	0.315512	0.49018				0.772323	0.251491	0.738441				0.608674	0.0728806	0.333856				0.665564	0.320995	0.267
	0.438316	0.143434	0.588427				0.231094	0.2518	0.218294				0.177591	0.0693269	1.79624				1.7687	1.6386	0.0822277
	0.0872649	0.431549	0.502054				0.656806	0.317724	0.661845				0.460312	0.265252	4.06303				0.717971	0.412641	0.429958
	0.206278	0.289321	2.15012				0.411493	0.631392	0.277253				0.207365	0.0377918	0.207631				0.413169	0.314986	0.525501
	0.549903	0.329912	0.906756				0.563208	0.171037	0.668087				0.0785294	0.53057	0.127579				0.385338	0.443413	0.301472
	0.148853	0.565543	0.838435				0.40839	0.235685	0.142127				0.164761	0.106704	0.56352				0.308248	0.265955	0.852107
	0.290949	0.370702	0.242106				0.162742	0.306232	0.113709				0.655027	0.00670948	0.168222				0.311409	0.267299	0.648816
	0.383281	0.173894	0.914145				1.04889	0.430993	1.1047				0.0717244	0.277893	0.627549				0.145074	0.34218	0.145428
	1.81418	0.758666	0.313912				0.344967	0.206683	0.236626				0.620591	0.0129957	0.111292				0.292811	0.175502	0.120092
	0.175118	0.778739	0.407497				0.274956	0.0807777	0.268751				0.917336	0.385836	0.0898685				0.243185	0.182644	0.345957
	0.350875	0.0967995	0.474723				0.363333	0.0591937	0.784744				0.183787	0.203223	0.219229				0.705626	0.685715	0.147033
	0.109634	0.433508	0.442663				0.767164	0.304496	0.902702				0.400586	0.396893	0.510503				1.14473	0.362641	0.248131
	0.155368	0.81015	1.47464				0.743199	0.244827	0.148281				0.438274	0.125118	0.189878				0.355197	0.275646	0.484904
	0.476305	0.336762	0.58955				0.274268	0.153166	0.0705935				0.208272	0.0886989	0.229918				1.39951	0.75754	0.26794
	1.43681	2.13202	1.21635				0.171425	0.353775	0.357743				0.817812	0.858749	0.344741				1.28158	0.124036	0.491577
	0.630626	0.648121	1.40758				1.71432	0.0819838	2.106				0.190651	0.964893	0.384463				0.507823	0.407043	0.37375
	0.510715	0.441153	1.06227				0.749233	0.0697642	0.255997				0.883551	0.271764	0.275552				0.470495	0.202734	0.732287
	0.494928	0.470206	0.813511				0.289124	0.364783	0.531156				0.958025	0.37089	0.404392				0.150499	0.472293	0.444869
	2.43617	0.264869	0.196379				0.223488	0.490003	0.905278				0.102602	1.05065	1.366				0.151079	0.7812	0.447344
	0.933095	0.235456	1.41823				0.398638	0.211276	0.647212				0.154867	0.282846	0.282757				0.0952506	0.872435	0.255534
	0.231236	0.816908	0.647284				0.822371	0.440899	0.746686				0.654234	0.336514	0.177544				0.49737	0.1387	0.0482108
	0.83183	1.56544	0.717538				0.207836	0.300378	0.843868				0.638668	0.239848	0.151444				0.23864	0.619389	0.147319
	1.22333	0.756814	0.663387				0.223493	1.81326	1.13979				0.0658671	0.368661	2.5274				0.341025	0.379293	0.291859
	0.64131	1.02891	0.713974				0.462295	0.783525	0.564093				0.534215	0.156944	0.541666				0.888248	1.43883	0.281819
	0.697502	1.09818	0.486252				1.30827	0.787679	0.288948				0.41547	0.823748	1.16592				0.325599	0.401755	0.313439
	0.364103	0.404481	1.01876				1.09575	0.373753	0.420247				0.104115	0.552169	0.77251				0.899669	0.329082	0.198187
	0.770087	1.0958	0.138632				0.414875	0.205639	0.222654				0.0761641	0.5932	0.0670192				0.404224	0.203189	0.372022
	0.399714	0.437944	1.21686				1.08377	0.159183	0.736634				1.18662	0.399403	0.247945				0.587247	0.723153	0.728803
	0.453648	0.252716	0.603735				2.83331	0.498487	0.179312				0.329218	0.52296	0.159943				0.0393771	1.23828	0.405131
	1.80984	0.787379	0.623157				1.14929	0.42707	0.53942				0.484477	0.424463	0.0806601				0.156194	0.234613	0.226386
	0.326537	0.366787	0.302183				0.746239	0.46094	0.459606				0.80886	0.0605304	0.362296				0.241427	0.0911045	0.113984
	0.419506	2.26571	0.934203				0.164869	1.49131	0.403013				0.915762	0.279204	0.532097				0.652064	0.220965	0.240639
	0.41189	0.929324	1.1041				0.81766	0.495796	0.863553				0.227135	0.653652	0.948474				0.346515	0.284662	0.0168459
	0.414418	0.333112	1.09558				0.104211	0.661407	1.58363				0.237407	0.305955	0.667267				0.407353	0.481176	0.334266
	1.44074	0.905191	0.734738				0.372476	1.29414	0.518916				0.157943	0.092468	0.0565385				0.100642	0.0755505	0.791873
	0.0812906	0.393299	0.317295				0.547175	0.212366	0.470159				0.450656	0.35329	0.681157				0.722456	0.169616	0.181103
	0.182	0.878328	0.930087				1.35605	0.281015	0.796571				0.431968	0.275097	0.0332942				0.0376213	0.227301	0.0495515
	1.15229	2.62709	0.840272				0.704185	0.331467	0.54734				0.205935	0.2939	0.11421				0.382016	0.401833	0.206777
	0.166118	1.19009	0.600919				1.01429	0.131157	0.988731				0.16715	0.761562	0.0458256				0.832739	0.976971	0.251606
	0.274604	0.613771	1.37016				0.423094	0.185548	0.400144				0.115614	0.945034	0.591921				0.0716496	1.01496	0.716291
	0.50267	0.985781	0.644946				0.166114	0.446853	0.334238				0.394697	0.536761	3.56426				0.156204	0.0812342	0.111379
	0.102353	0.40675	0.158324				0.749793	0.383716	0.643722				0.461862	0.641698	0.129255				0.175281	0.286503	0.441188
	0.635282	0.247459	0.706851				0.743482	0.475126	0.639702				0.206671	0.356385	0.296578				0.635171	0.378866	0.306961
	0.124782	0.345253	0.364685				1.91116	0.590414	0.210604				0.320642	1.18697	0.241096				0.295689	0.482443	0.348767
	0.971078	1.01397	0.867457				0.807258	0.235685	0.262905				0.293404	1.19931	0.0498357				0.238502	0.418689	0.335826
	0.691138	0.396799	1.2502				0.301472	0.936576	0.753759				0.611114	0.868705	0.362063				0.220645	0.248072	0.412113
	0.332172	0.705225	0.0404031				0.141761	0.196498	0.524664				0.282166	0.698736	0.32518				0.23374	0.103094	0.171777
	0.782786	0.707114	0.350395				0.798381	1.016	0.606863				0.194963	0.211094	0.0261181				0.297066	0.174407	0.132727
	0.58723	0.529489	0.618536				0.396129	0.71134	0.542945				0.67237	0.310787	0.413438				0.606263	0.503744	0.164714
	0.199608	0.186633	0.512005				0.0719929	1.17218	0.606945				0.0256615	0.380398	0.0302619				0.675201	0.485051	1.39142
	0.395311	0.491164	0.2774				0.267111	0.246447	0.621026				0.690556	0.133692	0.805007				0.611077	0.146847	0.308145
	0.418513	0.736531	1.03145				0.653111	1.29111	0.150036				0.268736	0.220561	0.0509811				0.051163	0.171484	0.118369
	0.560685	0.447635	2.02575				0.77227	0.706506	0.490589				0.495432	0.439407	0.219262				0.37356	0.795187	0.20122
	0.263121	0.42525	0.828659				0.501	0.0668891	0.548619				0.958493	1.55325	0.16154				0.420815	0.758121	1.2372
	0.219669	0.631927	0.520712				0.489468	1.25629	0.113628				0.54395	0.444382	0.313456				0.200848	0.172493	0.157013
	1.32578	0.340896	0.417759				1.17765	0.156924	0.185728				0.343785	1.14391	0.483372				0.585838	0.346826	0.445629
	0.616346	1.05395	2.92288				0.475591	0.547864	0.466917				0.139553	0.326308	0.123745				0.0466934	0.580825	0.810213
	5.64274	0.363441	0.259672				0.212571	0.59349	0.543165				0.310198	0.55111	0.0935246				0.283894	0.092515	0.533677
	0.663828	0.294197	0.484511				1.56373	0.274008	0.947348				0.351505	0.0607403	0.445374				0.268394	0.565576	0.245254
	0.553484	0.726556	0.86902				2.3635	0.390105	0.511				0.984334	0.335079	0.0408639				0.411632	0.443163	0.305944
	0.435955	0.315453	0.974967				0.536178	0.135941	0.26063				0.185106	0.707906	0.318438				0.328797	0.223659	0.259983
	0.339964	0.426652	0.403148				0.636717	0.465277	0.339842				0.383832	0.244518	0.435329				0.280854	0.356146	0.403888
	1.70525	0.271749	0.438752				0.636057	0.6469	0.446185				0.658574	0.270431	0.377758				0.50919	0.321487	0.384381
	0.643909	0.815834	0.146963				0.710601	3.04573	0.614806				0.528628	0.637755	0.0989595				0.335517	0.205821	0.594387
	0.432018	0.2304	0.148669				1.00176	0.129458	0.251038				0.245627	0.59052	0.213897				0.156289	0.260771	0.685369
	2.47707	0.803756	0.686148				0.689191	0.240425	0.142979				0.17891	1.05949	0.240785				0.291346	0.217621	0.344849
	0.876458	1.23494	0.38517				0.614809	0.357105	0.187033				0.0843256	0.237863	0.180268				0.0267848	0.408372	0.218314
	0.441601	0.0513771	0.294007				3.31321	0.189396	0.333286				0.0842472	0.434748	0.953765				0.361718	0.732653	0.373052
	0.697052	0.773693	0.163691				0.65618	0.212169	0.34987				0.431677	0.501472	0.0435015				0.228528	1.27546	0.0333669
	0.463942	1.35084	0.720538				0.692114	0.313463	0.239392				0.17575	0.39338	0.160178				0.120622	0.0354587	0.493388
	0.570697	2.37997	0.92926				0.396867	0.212641	0.502713				0.357881	0.18273	0.16221				0.102412	0.91626	0.463305
	0.681642	2.1721	0.265404				0.244976	2.12798	0.334312				1.22321	0.247799	0.0690853				0.107552	1.53932	0.341933
	0.102837	2.43996	0.761531				0.697405	1.16605	0.245471				0.373304	0.336924	0.701731				0.368941	0.293952	0.66174
	0.204238	1.20721	0.138109				0.721598	0.151876	1.10249				0.332635	0.327333	0.300189				1.36777	1.43012	0.951793
	0.157977	0.918398	1.55926				1.10293	0.406582	0.509667				0.307296	0.127686	0.15324				0.4295	0.673355	1.69847
	0.228531	0.447181	0.424578				0.299599	0.598146	0.0889906				0.135993	0.144739	0.0269449				0.379556	0.357396	0.356482
	1.06173	1.16687	0.840718				0.360457	0.342149	0.333928				0.181262	0.202502	0.0329974				0.300058	0.498975	0.069297
	0.62046	0.593761	0.184628				0.388294	0.348627	0.924615				0.22561	0.134704	1.16276				0.791856	0.249984	0.489687
	0.781167	2.46537	0.613545				1.07108	0.627101	0.265253				0.554401	0.399055	0.173685				0.580763	0.270181	0.0855141
	0.678652	0.457251	0.270956				0.362531	0.480757	0.279179				0.231637	0.959412	0.0346364				0.213866	0.807157	0.0354896
	0.504495	0.90212	0.255256				0.364134	0.450478	0.0545169				0.431889	0.545782	0.172022				0.0710344	0.268114	0.131054
	0.317092	0.28007	0.394608				0.246497	0.326197	0.312065				0.10327	0.952277	0.0767341				0.538208	0.149614	0.203911
	1.04331	0.0906435	0.888682				1.72961	0.252985	0.191777				0.356601	0.29904	0.64687				0.30577	0.142293	0.297332
	0.421629	0.318548	0.715284				0.482821	0.208853	0.21333				0.170418	0.186598	0.903213				0.0362333	0.223295	0.129811
	0.536841	0.929415	0.670389				0.359021	0.353359	0.418417				0.0701095	0.193008	0.0915528				0.294621	0.344431	0.230879
	0.619409	0.169296	2.52329				0.14991	0.45686	0.133103				0.529382	0.330558	0.0494438				0.0754469	0.147621	0.149484
	0.477791	0.588652	0.462211				0.396441	0.150938	0.195796				0.330247	0.436343	1.06918				0.106977	0.164529	0.245679
	0.414643	0.272173	0.41416				0.166675	0.613493	0.638725				0.16997	0.605853	0.0519386				0.25446	0.459919	0.13039
	0.578974	0.51026	0.745373				0.276832	0.330672	0.466075				0.286098	0.22703	0.770533				0.30537	0.157822	0.26939
	0.166591	0.219007	0.320431				0.642292	0.788807	0.284639				0.386543	0.0516815	0.388945				0.0515742	0.249251	0.391171
	0.589857	0.424432	0.575593				0.314385	1.00887	0.27859				0.125399	0.399799	0.214317				0.267362	0.629435	0.165755
	0.332703	0.128645	0.555909				0.130316	0.226612	0.262246				0.332107	0.358022	0.125538				0.305877	0.168213	0.601945
	1.38085	0.332074	0.445005				0.153904	0.600396	0.470907				0.936397	0.553031	0.282311				0.30034	0.307732	0.214683
	0.472253	0.316558	0.467394				0.294504	0.28004	0.44818				0.250272	0.187159	0.0754564				0.224403	0.166736	0.272704
	0.194036	0.180632	0.256456				0.16896	0.669377	0.299699				0.366742	0.403468	1.16501				0.286508	0.355143	0.397279
	0.659659	0.320653	0.587775				0.312705	1.27204	0.143506				0.0558217	0.360372	0.430559				0.165758	0.441707	0.181221
	0.81238	0.155808	0.592077				0.318524	0.444981	0.593306				0.307758	0.703723	0.909592				0.704844	0.553574	0.330483
	0.285568	0.757626	0.926907				0.226679	0.261524	0.811185				0.574881	0.287386	0.130393				0.562438	0.0829496	0.808889
	1.06577	0.309281	1.08396				0.725256	0.500033	0.210685				0.39935	1.61224	0.286542				0.465137	0.364296	0.10839
	0.415827	0.511741	0.577194				0.181343	0.533404	0.319326				0.715161	0.0684037	0.301489				0.0760707	0.177029	0.116586
	0.510479	0.316996	0.261063				0.14046	0.761095	0.338093				0.126639	0.172893	0.365722				0.0365505	0.466834	0.791919
	1.12541	1.10758	2.57606				0.182819	0.412669	0.0181238				0.286033	0.91626	0.0840588				0.701752	0.129686	0.372163
	0.773803	0.385758	1.91764				0.445478	0.177415	0.0848432				0.165985	0.463144	0.0631084				0.0381485	0.0884251	0.792782
	1.19944	0.596545	0.871291				0.107634	1.34099	0.107816				0.974159	0.225342	0.859002				0.913264	0.523892	0.47717
	0.544861	0.426364	2.59066				0.132017	1.37446	0.716708				2.38478	0.235454	0.292641				0.0332441	0.18166	0.423585
	0.307192	0.631454	0.870338				0.12452	0.82449	0.0679227				0.429974	0.499902	0.317162				0.203418	0.307534	0.773514
	0.636225	0.75025	0.218778				0.462485	0.676937	0.146205				0.190226	1.19233	0.0886722				0.103837	0.295749	0.2836
	0.341769	0.750095	1.78734				0.124474	0.38487	0.0524826				0.644384	0.405276	0.195002				0.240263	0.282766	0.941799
	0.207311	0.184659	0.327651				0.0832187	0.260838	0.161144				0.0169164	0.371799	0.498384				0.0567667	0.148212	2.05466
	3.9667	0.161152	3.43028				0.534584	0.511934	0.804506				0.540832	0.182134	0.0877011				0.152396	0.372625	0.742168
	0.222787	0.0480915	0.674383				0.122377	0.833614	0.143483				1.18175	0.562025	0.248001				0.100418	0.835448	0.534866
	0.565588	0.982138	1.4692				0.203007	0.566721	0.965074				0.446764	0.867189	0.376865				0.735253	0.257979	0.163063
	0.245412	1.15339	0.444367				0.275225	0.441789	0.0136094				0.366854	0.744959	0.281015				0.0781206	0.405212	0.347336
	1.78159	0.50382	1.0049				0.240596	0.819212	0.231931				2.20572	0.360378	1.13405				0.0718095	0.14238	0.519513
	0.403868	2.04318	0.334286				0.316368	2.10843	0.0298041				0.52387	0.387688	0.295509				0.400187	0.944813	0.110952
	0.270402	0.771118	0.969261				0.274968	0.539402	0.592941				1.42011	0.162316	0.308115				0.0354432	0.212809	0.740888
	0.196907	0.530059	0.802437				0.590156	0.106691	1.56519				3.96252	0.339632	0.948084				0.743498	0.207123	0.244127
	0.253019	0.246238	2.62195				0.35807	0.300058	0.2563				0.160574	0.535656	0.915749				0.700448	0.142882	0.1116
	0.669181	2.81213	1.04642				0.0548671	0.512021	0.320144				0.197999	0.364691	0.52618				0.0370061	0.622509	0.358526
	0.3848	1.12181	0.432658				0.429241	0.172396	0.502296				0.233081	0.286211	0.631553				0.0907726	1.3177	0.179213
	0.298881	1.23692	1.36034				0.211745	0.387413	0.374604				0.177514	0.26406	0.401056				0.288348	0.0395508	0.53586
	1.40115	0.392811	1.78124				0.149588	0.846202	0.203576				0.34493	0.940661	0.50483				0.312183	0.265507	0.526297
	0.107347	0.489043	0.113199				0.169595	0.167978	0.0187502				0.497919	0.999278	0.552776				0.0519689	0.308598	0.28428
	1.36018	0.936865	1.16739				0.0593712	0.071565	0.446587				0.967217	0.30527	0.273534				0.136923	0.19549	0.121193
	0.344114	0.380359	0.287908				0.140686	0.438736	0.465628				0.607306	0.32314	0.22351				0.0632333	1.05385	0.487646
	0.655894	1.55855	1.17207				0.170122	0.860177	0.428651				0.179498	0.25633	0.622143				0.521865	0.0273535	0.207761
	0.228092	0.724166	2.84313				0.109015	0.234254	0.0339969				0.22612	0.0851275	0.316173				0.20188	0.872452	0.454259
	0.357254	0.848412	0.514606				0.364999	0.877665	0.086107				0.593076	0.186348	0.160501				0.166516	0.143743	0.628266
	0.0668467	0.363878	0.690534				0.253842	0.249377	0.0675916				0.124143	0.391271	0.0562625				0.581212	0.0967381	0.142819
	0.215886	0.206553	0.86139				0.346079	0.306105	0.112379				0.226928	0.182956	0.420114				1.00994	1.0062	0.532012
	1.5882	0.530103	0.297836				0.294979	0.404528	0.732504				0.194645	0.26178	1.08867				0.61521	0.330192	0.282639
	0.307401	0.454706	1.38555				0.334695	0.485694	0.11007				0.22127	0.475684	0.482465				0.0521029	0.444723	0.813992
	0.317301	1.06874	0.390608				0.773064	0.2325	0.365061				0.820182	0.270419	0.448545				0.250471	0.45308	1.00797
	1.28611	0.552387	0.0808008				0.821624	0.186653	0.476349				0.912112	0.387659	0.319067				0.458554	1.33065	0.114358
	0.452213	0.526764	0.488121				0.403825	0.277629	0.395103				0.434143	0.205938	0.899864				0.187013	0.450715	0.226583
	0.35904	0.375823	2.7299				0.191544	0.441174	0.392789				0.555811	0.0711289	0.384068				0.342773	0.319451	0.111375
	0.0417293	0.660013	0.34255				0.285482	0.177501	0.347949				0.268029	1.2048	0.166712				0.340052	0.537182	0.173643
	0.423515	1.21195	0.888678				0.23864	0.33687	0.283384				0.115171	0.151485	0.753786				0.283198	0.186978	0.416945
	0.197687	0.391063	0.672301				0.455817	0.404202	0.45506				0.928949	0.372574	0.116781				0.307159	0.572432	0.076907
	0.885793	0.290283	0.113034				1.68692	0.239719	0.269885				2.40403	0.403716	0.484462				0.674078	0.16423	0.2638
	1.0467	0.567158	0.484852				0.239036	0.172751	0.309279				1.61892	0.629623	0.325023				0.47228	0.33356	0.80248
	0.469357	0.313331	0.885054				0.141136	0.475306	0.317084				0.159799	0.402062	0.447856				0.295012	0.23779	0.139755
	0.473742	4.79192	1.40229				1.07273	0.0800908	0.543709				0.18305	0.128802	1.11843				0.271149	0.249109	0.211693
	0.709779	0.444083	1.10149				0.109508	0.194123	0.55694				1.0438	0.0613369	0.63589				0.457654	0.902417	0.67978
	0.940667	1.10449	0.470922				0.280774	0.462927	0.772251				1.29177	0.621971	0.149535				0.371313	0.217986	0.713947
	0.391341	0.281266	1.28639				0.316373	0.885282	1.32852				0.135154	0.198606	0.449947				1.18618	0.377844	0.221248
	0.815161	0.359042	1.68366				0.201882	0.369268	0.26551				0.194831	0.870193	0.373133				0.640531	0.236379	0.136181
	0.316258	1.61037	0.181601				0.401553	1.25228	0.681071				0.377325	0.395998	0.209125				0.583951	0.935606	0.426734
	0.85273	0.79787	0.881014				0.168482	0.200779	0.26066				0.168212	0.0999575	0.179091				0.144455	0.878104	0.487265
	0.200651	0.181703	0.184064				0.15457	0.520298	0.107983				0.309885	0.739141	0.538146				0.803535	0.206913	0.656973
	0.0836142	0.866474	0.475815				0.182404	1.00144	0.254168				0.484393	0.326883	0.164119				0.421873	0.497818	0.055898
	3.45479	0.499588	1.07624				0.247573	0.110667	0.483675				0.133561	0.121854	0.221579				0.256537	0.129144	0.176725
	0.121686	0.973816	0.168728				0.224448	0.278188	0.305555				0.189942	0.630813	0.584187				0.416496	1.57295	0.138709
	0.477082	0.771254	1.26525				0.19916	0.825116	0.240484				0.202217	0.452853	1.57807				0.556899	0.43032	0.102603
	1.62194	0.299982	1.25627				0.707544	0.772318	0.10097				0.086287	0.312473	0.381176				0.127096	1.06839	0.247565
	1.14046	1.34106	0.191026				0.342281	0.290255	0.190813				0.0643551	0.569883	0.354255				0.368085	0.500467	0.407317
	0.857633	1.212	0.883184				0.345664	0.564543	0.812635				0.269634	0.337387	0.723763				0.337178	0.265604	0.123767
	0.458852	1.10417	0.46201				0.219096	1.7164	0.556079				0.0731569	0.117317	0.135964				0.527995	0.429508	0.300611
	0.980835	2.50846	0.837624				1.06241	1.12895	0.323906				0.277686	0.344639	0.521979				0.443824	0.707037	0.482472
	0.165388	0.248082	0.323279				1.06445	0.80578	0.653475				0.49285	0.098798	0.384699				0.809038	0.419333	0.219285
	0.559808	0.986936	0.951166				0.211215	1.4668	0.351594				0.10117	0.729483	0.362694				0.495733	0.215052	0.390906
	0.45143	1.30878	0.515583				0.218517	0.294918	0.377305				0.571461	0.818769	0.315696				0.395762	0.14135	0.40133
	0.231376	0.618779	0.712735				0.581567	0.361624	0.301833				1.08508	0.345147	0.142379				0.131986	1.26684	0.243026
	0.22374	0.85305	0.388091				1.84965	0.354101	0.37837				0.55883	0.158756	0.251119				0.201175	0.430655	0.125745
	0.655244	0.608604	0.677404				0.325696	0.539942	0.0859849				0.56131	0.130575	0.365861				0.484041	0.514074	0.819233
	0.0523324	0.484205	0.179686				0.507192	0.589218	0.581846				0.709732	0.615398	0.656782				0.0868186	0.255221	0.721943
	0.413035	0.606742	1.10507				0.286708	0.393573	0.684992				0.839003	0.567287	0.106815				0.649603	0.051689	0.301463
	0.868853	0.86876	0.438898				0.377615	0.337894	0.344564				0.658044	0.246676	0.192471				2.09507	0.221684	0.126409
	0.191679	0.411401	1.60601				0.412791	0.75159	0.375537				0.0422797	0.390603	0.720624				0.321198	0.519685	0.489798
	1.21044	0.392771	0.368995				0.383889	1.06642	0.530863				0.992403	0.111559	0.159262				0.421421	1.04513	0.161231
	0.100022	0.877945	0.471687				0.105808		0.718588				0.510245	0.232412	0.468067				0.71272	0.519204	0.189519
	0.161547	0.812973	1.66384				0.468706		0.273341				0.398686	0.242748	0.52394				0.675121	0.785614	0.184571
	1.86839	0.615853	0.124475				0.147625		0.462645				0.447387	0.153362	1.06257				0.890518	0.417495	0.339022
	0.483341	1.64183	0.301121				0.761084		0.544307				0.245531	0.201359	0.900257				0.679634	0.0704429	0.35908
	0.406132	0.488453	0.825056				0.636321		0.279108				0.190639	0.925033	0.515819				0.154041	0.666716	0.141483
	0.38925	0.645763	0.653524				0.296134		0.187042				0.791287	0.153441	0.85897				1.42726	0.458577	0.105671
	0.784932	0.442605	0.510136				0.355772		0.3895				0.706456	0.671686	0.497578				1.01422	0.45265	0.250112
	0.545166	0.519786	0.306831				0.508329		0.321571				0.0778073	0.313683	0.248998				0.18119	0.683858	0.204211
	0.317975	0.376134	0.858763				0.21256		0.61044				0.377161	0.442401	0.580512				0.451296	0.232656	0.374393
	0.563147	0.825778	0.498522				0.439717		0.212388				0.592784	1.28105	0.466041				0.369667	0.998525	0.465882
	0.807277	0.811499	0.228312				0.588697		0.402678				0.0985668	0.298881	1.77501				0.435621	0.159544	0.816751
	0.632602	0.624773	0.665919				0.973737		0.403445				0.666012	0.7167	1.66704				0.900624	0.378602	0.371393
	1.10365	0.270686	0.936129				0.478437		0.483853				0.316194	0.0991684	0.538271				0.254997	0.900511	0.617143
	0.421692	0.348063	0.848818				0.390224		0.0869341				0.351915	1.31092	0.529884				0.411181	0.137118	0.429384
	0.612984	0.353951	0.286548				0.0852419		0.251219				0.799211	0.174641	2.10643				0.395637	0.238461	0.270547
	0.711753	0.689788	3.49431				0.0676477		0.504147				0.128734	0.528678	0.474778				0.278392	0.558422	0.250647
	0.741792	0.805794	0.12827				0.333979		0.165049				1.5508	1.66753	0.32143				0.213281	0.120464	0.150822
	0.172152	1.66278	0.942941				0.215992		0.897303				1.00044	0.247672	0.569663				0.514571	0.0366425	0.637405
	0.134314	0.614332	0.6231				0.189766		0.437455				0.664931	0.741362	0.160506				0.259488	0.152853	0.223823
	1.55317	0.281702	0.650833				0.419998		0.761861				0.151771	0.896172	0.467112				0.309227	1.49606	0.655828
	0.84083	0.380703	1.24337				0.53992		0.26178				0.265096	0.15482	0.340994				0.113901	0.234031	0.444354
	0.489283	0.229441	0.610991				0.224632		0.743965				3.25977	0.551541	0.339888				0.413662	0.153582	0.238876
	0.710742	0.527373	0.69186				0.0853604		0.182212				0.510741	0.377046	1.67935				0.228034	0.406256	0.188198
	0.587693	0.698256	0.710618				0.27957		0.889667				0.0516057	0.296213	0.0701559				0.433318	0.0904588	0.349541
	0.227968	1.51241	0.949889				0.319224		0.436647				0.074564	0.455887	0.472312				0.382438	0.138283	0.811251
	0.27829	1.18866	1.20504				5.3986e-06		0.679811				0.379029	0.757866	0.916929				0.34896	1.07553	0.219334
	0.35276	0.909495	0.553512				0.378461		0.358501				0.214366	0.918259	0.348067				0.682208	0.222136	0.750171
	0.694368	0.641338	0.569475				0.58602		0.619276				0.178749	0.230383	0.101456				0.507706	0.784361	0.270663
	0.247291	0.646402	0.647188				0.817559		0.54504				0.194134	0.164782	0.811723				0.169417	0.881635	0.388611
	0.825285	0.559582	1.53663				0.101141		0.143294				0.880766	0.370252	0.373303				0.150262	1.21066	0.287341
	0.761922	0.231812	0.230105				0.652008		0.641868				0.681657	1.3403	0.409181				0.423523	0.266575	0.463749
	0.567836	1.01848	0.943124				2.35408		0.238827				0.325537	0.375629	0.322532				0.288823	0.686208	0.918934
	0.747978	0.617923	0.497464				0.532571		0.3624				0.194478	0.569537	0.14962				0.405109	0.799486	0.899672
	1.1725	0.322082	0.555753				1.24992		0.280365				0.882904	0.104125	1.01771				0.288199	1.14309	0.07185
	0.398168	0.843944	0.912064				0.333742		0.354658				0.631077	0.5482	0.532761				0.489241	1.26014	0.783193
	0.195387	0.811961	0.877896				0.538715		1.51676				0.486563	0.526121	0.252447				0.835664	0.203217	0.305006
	1.29933	0.93115	1.29099				1.02608		0.30543				0.341252	0.604663	0.31053				0.203207	1.14897	0.307677
	0.196043	0.131652	0.662609				0.492441		0.491005				0.903506	0.571008	0.340088				0.064992	0.670563	0.291667
	0.452669	0.807298	0.44442				0.353039		2.54002				0.524972	0.413729	0.856382				0.373999	0.245651	0.342102
	1.0581	0.897957	0.776541				1.25961		0.3583				0.403338	0.343748	0.797199				0.142131	0.496532	0.172095
	1.38913	0.472961	1.84168				0.377436		1.98456				0.0791378	0.781775	0.512254				0.428382	0.253531	0.279784
	0.634969	0.556831	1.42088				0.453245		0.500747				0.153384	0.247774	0.231762				0.274746	0.275241	0.570931
	0.553525	0.127576	0.976081				0.431286		0.369518				0.178576	0.183459	0.733727				0.518909	0.896284	1.09366
	0.574687	0.770519	0.736596				0.384829		0.198093				0.114353	0.41937	0.548743				0.116493	1.38299	0.175631
	1.50373	0.775015	0.380576				0.209517		0.233163				0.219158	0.341218	0.538126				0.539022	0.576793	0.0720993
	0.440219	0.411899	0.666637				0.0601865		0.479804				0.320602	1.81575	0.195872				0.761576	0.941594	0.41448
	0.539962	0.297019	0.35581				0.323232		0.522685				0.0991606	0.526249	0.596347				0.110216	0.220099	0.249542
	0.733578	0.822058	0.593409				0.140039		0.211536				0.464896	0.116035	0.24353				0.177271	0.64018	0.819256
	0.249807	0.726595	0.895936				0.138397		0.18121				0.727063	0.180624	1.29561				0.367659	0.387759	0.295882
	1.16098	0.720955	0.206781				0.372763		0.187171				0.113934	0.290086	1.07493				0.14331	0.318344	0.866296
	0.398615	0.861699	0.527127				0.419337		0.529038				0.369438	0.446247	0.373516				0.171824	0.832288	0.0434163
	0.490025	0.493834	0.614824				0.0965598		0.540515				0.387058	0.647409	0.236895				0.734885	0.146889	0.444561
	0.446642	0.800416	0.750898				0.629076		0.78369				0.610014	0.211169	0.209788				0.242455	0.0369551	0.174995
	0.362739	1.73111	1.52476				0.151889		0.532153				0.606384	0.164259	0.683506				0.278339	0.236926	0.27696
	0.635603	0.224097	2.60184				0.179028		1.15238				0.461276	0.4896	1.045				0.260794	0.246423	0.0813106
	0.755004	0.803334	0.71453				0.302167		0.531516				0.169243	0.310563	0.626524				0.16491	0.474968	0.0264928
	0.804368	0.599608	0.437819				0.347529		0.175885				0.204756	0.128101	0.228662				0.105972	0.801863	0.762234
	0.474574	1.21373	0.796009				0.429052		0.477322				0.514811	0.059914	0.480125				0.31471	0.682542	0.742622
	0.559001	1.01661	2.24538				0.244573		0.332119				0.317557	0.876572	0.222363				0.270762	0.864846	0.319479
	0.617163	0.356826	0.374255				0.570627		0.671865				0.113405	0.263656	0.335443				0.450149	0.103755	0.0318024
	1.12133	0.126154	0.364912				0.105828		0.549438				0.882024	0.183321	0.33364				0.130167	0.679331	0.286099
	0.630021	1.46934	0.302912				0.196212		0.207111				0.213404	0.390713	0.240439				0.214453	0.822541	0.0406045
	0.249369	0.174909	0.728187				0.168891		0.412553				0.453434	0.237646	1.53313				0.46416	0.336824	0.432653
	0.383227	0.20589	0.0562021				0.215985		1.11321				0.924588	0.364285	0.625779				0.366251	1.28594	0.192248
	0.341698	1.07787	0.120582				0.0682213		1.04184				2.33618	0.233346	0.622236				0.630614	0.236104	0.69968
	0.788499	0.724116	2.46219				0.39331		0.914493				0.12529	0.763233	0.439013				0.694984	2.27462	0.704832
	0.811703	0.61085	1.61412				0.442128		0.844013				0.529566	0.221377	1.34211				0.442945	0.523291	0.370883
	1.06149	0.130226	0.0483725				0.181135		0.174411				0.042959	0.178055	0.553008				0.116933	0.311739	0.350632
	0.561341	0.576814	1.16672				0.178731		0.388932				2.08894	0.653936	0.157934				0.489828	1.50698	0.373901
	0.824163	0.669611	1.51738				0.15429		0.529779				0.732803	0.317684	0.37411				0.400741	0.186983	0.140196
	0.504989	0.657536	0.854562				0.239331		0.675205				0.132171	0.065084	0.160593				0.327831	0.113911	0.0524604
	0.36651	1.94514	0.666069				0.511401		0.593157				0.334581	0.783015	0.532164				0.284596	0.61086	0.50274
	1.24196	1.68785	1.28524				0.826166		0.575219				0.36797	0.122979	0.234865				0.586989	0.352204	0.797488
	0.706421	1.11798	0.723667				0.248814		0.333213				0.23239	0.333781	0.388213				0.697669	0.665811	0.827163
	0.660116	0.667071	1.43106				0.28554		2.26365				0.172196	0.162703	0.131545				1.6665	2.36134	0.427994
	0.211029	0.806045	1.30505				0.124372		0.0905024				0.18484	0.47172	0.170311				1.15633	0.35204	0.87134
	0.336999	0.801092	0.419442				0.416675		0.929511				0.225527	0.161381	0.497354				0.265104	0.0859327	0.326677
	1.4493	0.184466	1.50182				0.170583		0.169582				0.412325	0.82319	0.441829				0.22953	0.466368	0.695549
	0.644077	0.769137	0.543391				0.819929		0.0528878				0.237904	0.259082	2.00471				0.591441	1.09263	0.197002
	0.37276	0.265935	0.419341				0.281516		0.349366				0.211651	0.150437	0.286845				0.994755	0.267365	0.300751
	0.211852	0.547099	0.431789				0.391314		0.778694				0.928476	0.546463	0.367473				0.222894	0.541062	0.26342
	0.22983	0.632392	0.754939				0.30594		0.319873				0.411471	0.0794743	0.641465				0.458894	0.124929	0.185714
	0.666152	0.680305	1.18986				0.810147		0.0363226				0.642332	0.287404	0.128619				0.248029	0.261993	0.179199
	1.02323	1.95169	0.783182				0.468294		0.247373				0.309383	0.731426	0.918421				0.0910319	0.15005	0.697087
	0.719598	0.452929	0.157557				0.160778		2.00327				0.266263	0.582005	0.167146				0.214766	0.152192	0.450676
	0.431856	0.958959	0.622249				1.12101		0.0728804				0.298735	0.24436	0.0928754				0.293146	0.829899	1.1914
	1.16768	0.89771	0.965645				0.538977		0.984995				0.427055	0.284905	0.687518				0.454433	0.149763	0.504423
	1.50838	1.26642	0.109845				0.295463		0.22721				0.166261	0.153479	0.101375				0.22072	0.058119	0.0355364
	0.513885	0.584804	0.726012				0.317331		0.444004				0.81466	0.595736	0.0630577				1.14838	0.377687	0.378956
	0.603642	0.380388	0.627948				0.249463		1.17158				0.191366	1.03137	0.49988				0.236639	0.277289	0.110521
	0.897204	0.077354	0.762888				0.242918		0.266227				0.212853	0.349427	1.43863				0.125334	0.113296	0.506177
	0.399485	0.293885	0.463629				0.290492		0.307911				0.298212	0.18027	0.0531937				0.171922	0.534789	0.526826
	0.42423	0.220054	1.10574				0.839047		0.549416				0.285468	0.138024	0.96421				0.325706	0.425038	0.20148
	0.971675	0.735755	0.465111				2.53063		1.14771				0.135376	0.0388777	0.585383				0.258238	0.505162	0.241349
	0.784789	1.00981	0.953307				0.387897		0.152189				0.169704	0.314006	0.2333				0.152483	0.209091	0.525866
	0.273001	0.678035	2.87884				0.374045		0.542184				0.0835667	0.0796504	0.55439				0.0885904	0.737203	0.458762
	1.10377	1.11987	0.98523				0.344303		0.993865				0.106331	0.834229	0.0563141				0.163325	0.821044	1.64334
	0.237036	0.610091	0.495137				1.78934		0.982389				0.453664	0.0454663	0.786418				0.112026	0.664752	0.769844
	0.308496	0.8623	1.08741				0.36147		0.131091				0.854276	0.838104	0.0937574				0.182253	0.517748	0.0896436
	0.334059	0.902951	0.462589				0.930024		0.505305				0.535782	0.131917	1.46449				0.113853	1.38102	0.375628
	0.161594	0.468198	0.398151				0.346668		0.346793				0.444806	0.170359	0.479386				0.164856	0.448014	0.12264
	0.897792	2.22037	0.194317				0.760941		1.06842				0.380961	0.23936	1.26483				0.273823	0.131368	0.272991
	0.269817	0.509699	0.664037				0.492946		0.422974				0.190002	0.590042	0.428292				0.27378	0.427271	0.342691
	0.496036	0.459716	1.60783				1.86712		0.837495				0.44451	1.06182	0.809715				0.121594	0.0977542	0.34061
	0.632347	0.679994	0.594785				0.776083		0.176192				0.57063	0.26792	0.157785				0.271215	0.632813	0.602256
	0.527787	0.118323	0.776994				0.386015		1.18825				0.507942	0.458941	0.220038				0.0736954	0.363917	0.585657
	0.777254	0.407343	0.289602				0.519817		0.113644				0.292617	0.465111	0.214182				0.487975	0.20925	0.277794
	1.82844	0.346009	0.602283				0.521835		0.726756				0.101498	0.0789452	0.289061				1.00068	0.562114	1.08458
	0.315312	0.519612	0.637903				0.473119		0.458207				0.465022	0.171831	0.682104				0.065391	0.717538	0.0682172
	1.06447	2.3535	0.790738				0.423183		0.808635				0.0765559	0.630119	0.316424				0.312215	0.340895	0.339363
	0.701449	0.397306	0.90079				0.161776		0.25941				0.0500434	0.57347	0.229354				0.287552	0.130114	0.14388
	1.04453	0.37091	0.924061				0.225125		0.572498				0.594937	0.664934	0.54737				2.14702	0.422097	0.209244
	0.397828	0.514046	0.171611				0.193805		0.94497				0.212072	0.576388	0.218982				0.707301	0.0936732	0.129827
	0.689882	0.657344	0.385976				0.559486		0.514655				0.282295	0.190057	0.135558				0.623809	0.409903	0.306129
	0.21197	0.246853	1.45782				0.880373		0.495714				0.987443	0.111503	0.461665				0.326134	0.195633	0.418751
	0.303362	0.444666	1.73251				0.199492		0.492069				0.169616	1.2482	0.234423				0.158832	0.474062	0.920869
	1.33179	0.838236	0.514997				0.437307		1.08743				0.44054	0.989497	1.82957				0.87814	0.122945	0.312398
	0.58108	0.188407	0.528892				0.635248		0.335532				0.548125	0.303091	0.0990599				0.628485	0.289593	0.743975
	0.285757	0.576287	0.619841				0.566098		0.486517				0.81786	1.24628	1.94096				0.284815	0.141624	0.658309
	0.374283	1.2401	1.12247				0.459218		1.44083				0.321849	0.304495	1.03867				0.268439	0.128367	0.0986228
	0.463496	0.581772	0.962578				0.481889		1.05077				0.202836	0.740278	0.651317				0.277029	0.752093	0.0913729
	0.730653	0.521523	0.786557				0.297437		0.392611				0.443422	0.2697	1.32405				0.359966	0.670923	0.327513
	0.662724	1.20302	0.399472				1.00184		0.344009				0.331885	0.125169	0.585428				0.70679	0.40567	0.406166
	0.209075	1.46684	0.446314				1.88293		0.671646				0.387629	0.81771	0.561071				0.208095	0.200882	0.784661
	1.26785	0.575061	1.8764				0.606008		0.748564				0.0952322	3.17725	0.0546244				0.60678	1.35753	0.0814895
	0.491222	0.216937	0.80196				0.729441		0.807191				0.905575	0.925253	0.987359				0.28247	1.35572	0.477816
	0.400097	0.337445	0.963357				0.0819913		0.753287				0.241639	0.253868	0.303078				0.637297	0.233815	0.515628
	1.18104	0.820027	0.575048				0.661456		0.414416				0.481719	1.19179	0.889649				0.487619	0.548934	0.203204
	0.796615	0.38902	0.931068				0.579783		1.77276				0.299531	0.777968	0.388668				0.57469	0.2574	0.37263
	0.782025	1.98857	1.52132				1.69933		3.1071				0.285122	0.330072	0.284137				0.533618	0.489509	0.225527
	0.551389	1.21551	2.44734				2.66928		0.223757				0.570617	0.662737	0.659716				0.344392	1.10316	2.34132
	0.734289	0.796417	0.559839				0.305621		0.785224				0.158577	0.28371	0.40364				0.45297	0.244512	0.547672
	0.669226	0.22406	1.2941				0.558469		0.689021				0.627459	0.194291	0.993647				1.75329	0.301569	0.232825
	0.485015	0.669629	0.319352				1.11492		1.29835				0.181063	0.283569	0.257735				0.208071	0.554171	0.650886
	1.13179	0.435215	0.45167				0.471377		0.749922				0.216096	0.441684	0.159358				0.482736	0.709174	0.31949
	0.349859	0.64177	0.646175				0.655675		2.77204				0.181803	0.108337	0.324249				0.529346	0.376709	0.682882
	0.287846	0.29191	0.393782				0.353039		0.216667				0.172707	0.210172	1.40275				0.140991	0.102677	0.301399
	1.43529	4.04937	0.390039				1.23736		0.308743				0.159446	0.291407	0.438998				0.446038	0.225388	0.456631
	0.55498	0.705236	0.5073				0.458994		0.191723				0.357288	0.2548	0.430923				1.71484	0.10513	0.298683
	0.233424	1.06928	0.668041				0.470815		0.372677				0.467549	0.442225	0.18013				0.279806	0.40246	1.00142
	0.683805	0.548225	0.643877						0.502273				0.417015	0.423678	0.376708				0.639093	0.223681	0.155529
	0.685773	0.507435	0.61671						0.848277				1.11717	0.274708	0.729124				0.514883	0.625956	1.39613
	0.478564	0.206548	0.333068						0.449724				0.288294	0.191478	1.2822				0.621406	0.75771	0.448242
	0.956162	0.4242	0.940591						0.352679				0.258034	0.122409	0.405627				0.150249	1.31558	0.322943
	0.401365	0.439926	1.11077						0.394703				0.120067	1.12538	0.51356				0.510071	0.491451	0.511213
	0.904953	0.518281	0.524074						0.304049				0.152872	0.104773	0.743981				0.0750505	0.264081	0.148987
	0.74679	0.0983229	0.311923						0.43133				0.1648	0.269294	1.08785				0.699386	0.21389	0.89812
	1.74875	1.29642	0.235476						1.17028				0.672886	0.0779339	0.264153				0.63683	2.233	0.159107
	1.2848	0.212336	0.591642						0.8592				0.599599	0.0822636	0.246595				0.254534	0.0658055	0.790037
	0.863974	3.11011	1.043										1.09212	0.129829	1.62121				1.0399	0.308555	0.6661
	0.807704	0.970804	0.614987										0.419179	0.321802	0.0996139				0.612993	0.303353	0.108896
	0.44727	0.18158	0.680906										0.245748	0.822437	1.08567				0.879573	0.359797	1.74886
	0.599844	0.414008	0.94012										0.37524	0.122773	1.93718				0.535163	0.558021	0.108044
	0.555641	0.646622	1.03642										0.425507	0.602636	1.47738				0.605727	0.190913	0.361142
	0.861409	1.15082	0.101698										0.718045	0.33522	0.152237				0.242339	0.062962	0.107481
	0.930048	0.212766	1.21691										0.506	0.205989	0.672182				1.81833	0.982183	0.0838892
	1.81167	0.805157	0.124703										0.261883	0.927315	0.576149				0.55794	1.19951	0.0941122
	0.643427	0.370814	0.928397										0.920669	0.362677	0.0995402				0.182186	0.194716	0.513421
	0.316343	1.03464	0.765378										0.756408	0.107644	0.397655				0.973601	0.196326	0.24637
	0.538102	0.629532	0.237153										0.115468	0.170619	0.354248				0.682584	0.121789	0.294398
	0.968308	0.687735	0.506588										0.149882	0.0121883	0.741474					0.699914	0.247232
	1.16932	1.1151	0.718316										0.505053	0.108096	0.666113					0.370911	0.114585
	0.572303	0.763648	0.456576										0.111168	0.35149	0.268951					0.157527	0.243445
	0.422352	0.594796	0.320473										0.689115	0.209741	0.208564					0.124565	0.682892
	0.863109	0.533755	0.898981										0.0620752	0.323911	0.0470649					0.428804	0.102304
	0.552327	0.966685	0.205207										0.210732	0.500805	0.337793					1.0467	0.072641
	0.680725	0.856076	0.48861										0.109974	0.645122	0.905022					0.481998	0.769528
	0.714981	0.411481	1.31569										0.332269	0.258827	1.11628					0.15514	0.566935
	1.00031	0.0927921	0.807645										0.377069	0.123532	0.488828					0.168473	0.0500264
	1.06976	0.944392	0.116102										0.337525	1.12074	0.368499					0.357353	0.306358
	0.906596	0.555315	1.08886										0.141368	0.15909	1.54547					0.587046	0.0731084
	0.985719	0.200987	0.252758										1.33998	0.929749	0.491864					0.614932	0.578166
	1.02562	1.90186	0.320229										0.154171	0.232453	0.704253					0.232909	0.0567296
	0.119933	0.404379	0.283626										1.44417	1.72679	0.730187					0.171211	0.179057
	0.902119	0.544145	1.30445										0.385303	0.741043	0.642978					0.470584	0.296115
	0.756992	0.401274	1.34442										0.152894	0.660852	0.456506					0.253712	0.579252
	0.641351	0.569422	1.44408										0.272866	0.120565	0.258209					1.06215	0.654008
	0.267251	0.722087	0.383652										0.246075	0.357829	0.215895					0.473226	0.100551
	0.541148	0.726984	0.667653										0.113899	0.064019	0.336268					0.581731	0.225857
	0.38056	0.718189	1.28086										0.345423	1.07099	0.234563					0.291742	0.881241
	1.06063	0.628298	1.70892										0.378591	0.520664	0.160783					1.51648	0.152403
	0.468982	1.22983	2.11488										0.397339	0.553618	0.570161					0.579504	0.608921
	0.344596	0.86713	0.328395										0.20654	0.281659	0.432088					0.204875	0.204805
	0.167893	0.69198	1.18503										0.0884417	0.0629918	0.848237					0.387103	0.577446
	1.33455	0.542798	0.414619										0.689997	0.151526	0.701331					0.332186	0.155443
	0.145418	0.770943	0.934797										0.919993	0.910689	3.26267					0.282985	0.20823
	2.23364	0.744066	0.662529										0.237074	0.136166	0.172313					0.288948	1.98354
	1.14871	0.738804	0.853873										0.576282	1.39444	0.716875					0.206093	0.401879
	1.49587	1.27468	1.59826										0.334264	0.287182	3.00452					0.255072	0.178701
	0.669829	0.397707	0.853839										0.181988	0.654556	1.09543					0.266876	0.198304
	0.449169	1.02127	0.925635										0.434093	0.249567	0.111221					0.401645	0.0672283
	0.120995	0.678249	0.948819										0.542347	0.414185	0.33071					0.241042	0.589612
	0.159389	0.931449	0.269694										0.498097	0.806561	0.928332					0.51947	0.236395
	0.0910633	0.482921	0.593975										0.342173	0.178188	1.49658					0.290929	0.400502
	0.281702	0.180226	0.594683										0.279989	0.0676887	0.138387					0.219694	0.0857273
	0.4754	1.03303	0.183955										1.26022	0.059599	0.601374					0.937953	0.36204
	1.63898	1.02844	1.08288										0.312651	0.412388	2.69069					0.196724	0.136205
	0.248508	2.68474	0.419458										0.50257	1.14625	0.595505					0.125291	0.554824
	0.270005	0.447858	0.314671										0.288706	0.143186	0.774766					0.537573	0.651178
	1.06163	0.889576	0.441739										0.205695	0.191909	0.922389					0.527076	0.523965
	0.524346	0.957851	2.44149										0.205149	0.873278	0.150284					0.836938	0.458713
	0.902403	0.20071	0.202859										0.344064	0.241598	0.657022					0.726628	0.234092
	0.382611	0.201465	0.658804										0.233052	0.509429	0.616882					0.0441191	0.212711
	0.362012	0.417793	1.85482										0.0664466	0.123997	0.846076					0.0788827	0.420578
	0.149331	0.444247	0.379703										0.250381	0.831861	0.219938					0.566437	0.047997
	0.253052	0.12779	1.93612										0.0822756	0.422205	0.124247					0.402801	0.952373
	0.372898	0.66432	0.229491										0.0809145	1.17953	0.326018					0.356063	0.40566
	0.494451	0.442603	0.311193										0.282691	0.39467	0.149131					1.91206	0.037199
	0.829159	0.44847	0.363137										0.0164338	0.151977	0.0777669					0.417353	0.431854
	0.6225	0.294486	0.804734										0.586171	0.22948	0.709506					0.397029	0.11545
	0.118115	0.420188	1.74843										0.0641732	0.154275	0.61636					0.219011	0.196962
	0.689759	2.21248	0.326533										0.0128351	1.95031	0.124693					0.345339	0.18806
	0.250922	0.620765	0.634445										0.201928	0.255142	1.00336					0.26904	0.075261
	1.89337	0.372003	1.75614										0.500882	2.3668	0.0986976					0.610322	0.170711
	0.881911	1.08435	1.38742										0.118718	0.111359	1.0474					0.910044	0.0612214
	1.04321	0.868663	0.639239										0.593098	0.1471	0.186493					0.335538	0.126938
	0.375628	0.856364	1.44413										0.235135	0.611177	0.504567					0.0713602	0.862702
	0.453206	0.543306	0.389948										0.806297	0.454567	0.226318					0.190734	0.302873
	0.22151	1.13223	0.324717										0.684959	0.27405	0.767739					0.259433	0.0774315
	0.4854	0.37803	0.693583										0.560643	0.560486	0.268748					0.190174	0.522706
	0.512259	0.434693	0.512151										0.850437	0.0858709	0.166793					0.688069	0.0156863
	0.908142	0.481992	0.218102										0.210024	0.323502	0.495744					0.56186	0.277817
	0.743013	1.11201	0.0982438										0.204104	0.30965	0.963526					0.679575	0.0665858
	0.193073	0.535848	0.244216										0.609113	0.689334	0.456485					1.13483	0.452715
	0.472711	0.372854	0.624788										0.787039	0.568762	0.437611					0.366726	0.38729
	0.411478	0.939101	1.12741										0.213806	0.161001	0.241328					0.87462	0.359296
	0.380588	1.48857	0.856281										0.243803	0.0251008	1.02576					0.18974	0.113359
	0.360585	0.926776	0.847142										0.326323	0.170677	0.453174					0.132877	0.950555
	0.311515	3.76823	0.21146										0.307705	0.163207	1.08811					0.275165	1.84532
	0.655392	0.30498	1.48691										0.162276	0.226082	0.857357					1.25425	1.45924
	0.154642	0.518811	1.50778										0.151839	0.500904	0.356824					0.301815	0.698677
	0.208841	0.670308	0.364571										0.158219	0.186237	0.768035					0.534675	0.360322
	0.140874	0.794382	0.241579										0.212799	0.326979	0.170938					0.381726	0.207919
	0.657708	1.25956	1.05963										0.221295	0.330442	1.38899					0.691433	0.357341
	0.565628	0.764553	0.0963566										0.379739	0.167644	0.55027					0.292564	0.407787
	0.50292	0.367963	0.108292										0.213218	0.9421	0.8431					0.129072	0.292443
	0.290936	0.512482	0.354081										0.191967	0.137022	0.676779					0.556743	1.3578
	0.502536	1.05764	0.6539										0.638276	0.703832	0.94209					0.585386	1.33382
	0.222328	0.417148	0.21284										0.426923	0.309563	0.293003					0.467293	0.263384
	0.653877	0.534258	0.756881										0.361363	0.566922	2.05031					0.256274	0.415505
	0.37348	1.05588	0.0942321										0.11279	0.589997	1.38838					0.141774	0.229808
	0.230786	0.717023	0.556763										0.239763	0.330227	0.449301					0.262359	0.205805
	0.535214	0.114648	0.283149										0.512158	0.457872	1.33632					0.786013	0.448835
	0.658194	1.06663	0.513344										0.180191	0.857083	0.247734					0.862732	0.787748
	0.32213	0.410879	1.93965										0.0967689	0.197445	0.423369					0.912289	0.655475
	0.159043	0.0610053	0.81302										0.256248	0.272083	1.1071					0.213392	0.768716
	0.459794	0.198835	0.484042										0.0800386	0.736231	1.01781					0.0766707	0.307916
	0.1435	0.380516	0.251343										0.380403	0.413529	1.26591					0.504657	0.121749
	0.36376	0.509962	0.520265										0.0696948	0.333378	0.197369					0.409366	1.17943
	0.282708	2.13075	0.835322										0.295528	1.49682	0.320933					0.0371192	1.15347
	0.306787	0.639354	0.247818										0.400848	0.804762	0.319534					0.748859	0.571818
	0.643598	0.861908	0.269386										2.38098	0.519514	0.987349					0.0925414	0.678166
	0.0577741	0.338443	1.00008										0.157254	0.806062	1.71631					0.623924	0.434451
	0.0657618	0.545835	0.438586										0.369128	0.0836018	0.887559					0.234569	0.550608
	0.551281	0.349177	0.546256										0.285113	0.0739874	0.349478					0.391593	0.576435
	0.154983	1.60892	0.872736										0.081233	0.297996	1.03414					0.23931	0.315405
	0.824718	0.61231	0.276686										0.183909	0.0673689	0.99755					0.221954	0.217384
	0.418826	1.24894	0.626936										0.411498	0.0825142	0.671739					0.238683	0.246788
	0.170932	0.55844	0.373503										0.819419	0.337605	1.02141					0.22457	0.544703
	0.0992562	0.781669	0.200987										0.192346	0.742907	1.14938					0.0840207	0.146322
	0.0427954	0.738491	1.5316										0.0742119	0.227158	0.798863					0.291384	1.16468
	0.0798177	0.206048	0.481738										0.279887	0.214412	1.04148					0.218724	0.332888
	0.326921	0.751023	3.65501										0.38305	0.131292	0.561246					0.21338	0.763797
	0.583812	1.32478	1.22491										0.238822	0.57871	0.269341					0.0509638	0.579761
	0.45097	0.196865	2.7233										0.66907	0.417455	0.327327					0.707452	0.324817
	0.377832	0.730321	0.939818										0.169553	0.558285	0.509844					0.784199	0.982682
	0.566682	0.31435	1.52208										0.273776	0.444951	0.765921					0.19003	0.0982376
	0.188765	0.508857	0.906992										0.402923	0.482392	0.437295					0.0373766	0.369263
	0.432223	0.252503	1.33969										0.525766	0.960506	0.254646					0.150067	0.532127
	0.362718	0.293017	0.319825										0.229841	0.652513	0.981993					0.262786	0.399975
	0.195103	0.504879	0.241917										0.19686	0.294131	0.350493					0.171409	0.627671
	0.51014	0.116366	0.380931										0.414496	0.608164	0.44884					0.240593	1.16384
	0.15021	0.535797	0.712027										0.395446	0.911234	0.554789					0.101465	0.210406
	0.179461	0.430989	1.35943										0.636801	0.122349	0.925613					0.422344	1.13595
	0.503707	0.571026	0.203289										0.181896	0.097234	0.281154					1.41711	0.480586
	0.977896	0.52423	0.514542										0.173964	0.887031	0.374099					0.453443	0.258983
	1.48521	0.289239	0.599469										0.215853	0.218676	0.632568					0.335003	0.392475
	0.0339068	0.123731	0.651849										0.30556	0.57104	0.893628					0.126509	0.358602
	0.939468	0.599644	0.227796										0.320759	1.76506	0.982867					0.678537	0.231272
	0.278473	0.431627	0.816508										0.0768375	0.392112	0.305408					0.499691	0.363711
	1.17422	0.284843	0.522477										0.480076	0.29021	0.434916					0.574163	0.627742
	0.274763	0.469604	0.882309										0.331902	1.26239	0.279631					0.957169	0.136243
	0.0627824	2.08825	2.68374										0.106284	0.755283	0.16457					0.220441	0.636966
	0.441508	0.368285	0.401282										0.336236	0.0880802	1.09891					0.545189	1.0083
	0.39983	0.912502	0.541186										0.119393	0.355789	0.349025					0.0635221	0.0746958
	0.560511	0.490719	0.586773										0.447278	0.266752	0.563715					0.17566	0.711567
	1.21731	0.585417	0.914441										0.187714	0.208498	0.263576					0.158591	0.164243
	0.279062	0.636976	0.471528										0.183179	3.23265	0.33816					0.826734	0.908906
	2.32398	0.172422	0.37309										0.446799	0.421647	0.864203					0.129129	0.594988
	0.654356	0.541906	0.889154										0.528113	0.124341	0.0423792					0.566368	0.218031
	0.242699	0.43161	0.168597										0.703148	0.0663853	0.598368					0.758528	0.521007
	0.573744	0.158903	2.26407										0.260414	0.43146	0.496643					0.321922	0.613033
	0.501233	0.370298	0.317056										0.244063	0.327634	0.342332					0.0916682	1.62719
	0.665293	0.512566	0.11246										0.307455	0.946505	0.227013					0.40602	0.310235
	0.336346	0.102084	1.72905										0.309167	0.0660745	0.895194					0.31924	0.438197
	0.217343	0.7719	0.494022										0.275278	0.219231	0.298646					0.397534	0.137082
	0.25775	0.241048	0.367285										0.0869709	0.469845	0.692194					0.150116	0.0859007
	0.83782	0.561718	0.71075										0.339579	0.634915	0.220149					0.522412	0.350831
	0.416027	0.741691	0.475291										0.84919	0.219525	0.58806					0.146374	0.109997
	0.242278	0.67642	0.421148										0.140195	0.120716	0.328692					0.106345	0.404992
	0.235532	0.431225	1.97696										0.607614	0.782138	0.458092					0.0641126	0.0967841
	0.386518	0.076609	0.998556										1.22449	0.340151	0.670061					0.819118	0.223246
	0.807145	0.609341	0.575774										0.335641	0.143664	1.25959					0.747961	0.682931
	0.174458	0.834862	0.62324										0.45525	0.332064	0.377745					0.558148	0.23635
	1.15482	0.395275	0.204892										0.151435	0.246954	0.578615					0.219037	0.170795
	0.360239	0.73998	0.365872										0.167163	1.17006	0.103609					0.171921	0.302345
	1.39055	0.045924	0.323926										0.25027	3.20005	0.455807					0.144983	2.32971
	0.364119	0.250627	0.236688										0.206679	0.300302	0.36572					0.120744	0.535493
	0.12111	0.225468	0.872428										0.50479	0.233367	0.402428					0.0963394	0.458381
	0.830369	0.550612	0.27514										0.357146	0.805479	0.512756					0.857146	1.54873
	0.365716	0.534385	0.247549										1.04476	0.748698	0.0902736					0.0553572	0.252996
	0.889949	0.667697	0.248263										1.0467	0.69242	0.432668					0.421104	0.124399
	0.264324	0.256985	0.299854										0.245985	1.0889	0.550464					0.250384	0.228287
	0.194879	0.447933	1.13926										0.214112	0.345025	0.429285					0.0948981	0.0545075
	0.237893	0.263689	0.863965										0.649579	0.655022	1.40972					0.86358	0.30319
	0.447419	0.386331	1.78312										0.577824	0.433026	0.616584					0.165648	0.0382619
	0.56253	0.345829	0.311408										0.413869	0.442644	0.403525					0.156911	0.463128
	0.569762	0.081624	1.04562										0.607409	0.888219	0.354259					0.469893	0.192924
	0.484684	2.55645	1.12474										0.263564	2.54677	0.891857					0.171881	0.478599
	0.640371	0.517324	0.22										0.428696	0.106889	0.457437					0.154326	0.214028
	0.465118	1.07597	0.134528										0.396223	0.829506	1.01212					0.32496	0.177764
	0.0782001	0.688156	1.08706										0.256598	0.0886056	0.210291					0.255505	1.47988
	0.554612	0.658709	0.186633										0.121089	0.48603	1.2265					0.829213	0.127556
	0.949448	0.699853	0.356851										0.415994	2.536	0.631211					0.362351	0.972143
	1.01261	1.01173	1.64639										0.250469	0.734599	0.134162					0.466881	0.103665
	0.227543	0.72807	1.09234										0.355004	0.219488	0.703551					0.198287	0.191015
	0.568317	1.20537	0.590944										0.190563	0.406338	0.573987					1.16873	0.253964
	0.689448	0.996379	1.02907										0.132642	0.0502333	0.429652						0.401012
	0.657132	0.448159	0.684045										0.309154	0.132432	0.289041						0.138446
	2.60706	0.251127	0.713268										0.270506	0.174381	0.279105						0.562757
	1.00048	0.597232	0.721364										0.207184	2.61056	0.374716						0.14149
	0.34178	0.889007	0.62778										0.21396	0.45066	0.110272						0.394118
	0.288649	2.66796	0.598681										0.264075	0.503601	0.451388						0.192254
	0.906211	1.15931	0.944397										0.212282	0.332522	0.294722						0.266423
	0.687932	0.926738	0.462411										0.837543	0.527093	0.284714						1.31373
	0.801891	0.672544	0.757636										0.179376	0.407855	0.421349						0.258676
	0.40306	0.707967	1.03398										0.187159	0.673295	0.642797						0.363852
	0.57524	0.645492	1.52775										0.189174	0.67121	0.343092						0.175028
	0.578366	6.37509	0.355982										0.554296	0.692245	1.05171						0.312481
	0.720974	0.217863	0.541216										0.285481	1.0472	0.295675						0.677512
	0.904955	0.945297	0.594478										0.429544	0.349832	0.237573						0.599351
	1.71438	1.76938	0.903762										0.236876	0.630152	0.508586						0.236829
	0.503107	0.370129	0.405521										0.231971	1.25646	0.409571						0.266213
	0.940738	0.926185	2.19147										0.171839	0.401627	0.281386						0.267302
	0.95184	0.355055	1.95444										0.286016	0.628976	1.74759
	1.66783	0.723273	0.787086										0.90684	0.730387	0.647784
	0.98629	0.489756	2.08534										0.135149	1.40295	0.342757
	0.974014	0.244526	1.18555										0.197839	0.282328	0.5421
	0.994078	0.526995	0.407927										0.260759	0.57045	0.716523
	0.875517	0.424926	0.962514										0.406787	0.568061	0.994445
	0.35607	1.166	0.680245										0.144276	0.603296	0.32724
	0.257605	1.19976	1.12753										0.206366	0.631628	0.140716
	0.0394658	0.403135	0.541755										0.245447	0.365229	0.175243
	0.144605	0.986262	1.17589										0.330887	0.905747	1.86326
	0.615551	1.43035	1.79621										0.240377	0.349039	0.364164
	0.461261	0.263834	1.22748										0.318229	0.100032	0.0718
	0.475057	0.849194	1.08954										0.953446	0.210735	0.368984
	0.367966	0.843759	1.04814										1.31182	0.238509	0.197357
	0.78984	0.776996	0.61331										0.137728	1.33639	0.2653
	0.631321	0.545949	1.19394										0.726924	0.929734	0.377989
	0.100695	0.343118	1.08794										0.241654	0.536098	1.10891
	0.0723949	0.362656	1.00668										0.0235302	1.26697	0.203009
	0.57669	0.826234	0.572231										0.521927	1.15182	0.22192
	0.29854	0.388186	1.71121										0.849598	0.259005	0.430196
	0.74542	0.621958	1.81862										0.755799	0.634772	1.14732
	1.43293	0.208422	1.11331										0.614532	0.405846	1.28837
	0.181591	0.637177	0.427421										0.182257	1.77889	0.498174
	0.314199	0.704697	2.87142										0.249298	0.379173	1.3458
	0.739546	0.709884	0.619239										0.521704	0.3545	0.44945
	0.268697	1.3962	0.648551										0.240774	0.176227	0.541002
	0.208997	0.308732	0.946322										0.425085	0.429755	0.484527
	0.0859773	0.647861	1.05953										0.312005	0.351737	0.133824
	0.0343055	0.664472	1.20603										0.168016	0.503396	0.861578
	3.09801	0.537767	1.38699										0.953956	0.814603	0.308696
	0.0605912	0.0566813	1.10744										0.138372	0.379062	0.137193
	0.363611	0.091826	0.923524										0.520139	0.894091	0.446473
	0.0631155	0.148693	0.222554										0.502034	0.171252	0.17232
	0.407156	0.177855	0.536297										0.609284	0.249022	0.165521
	0.024632	0.719546	0.170186										0.216691	0.599891	0.0838161
	0.626848	0.108859	0.414694										0.0964309	0.943281	1.18147
	0.116235	0.421139	0.24725										0.124807	0.629735	0.473502
	0.0455621	0.683335	0.263737										0.169726	0.241576	0.302268
	0.108358	0.887132	0.232308										0.303202	0.731446	0.375302
	1.15506	0.232966	1.18168										0.875771	0.232461	1.49015
	0.378448	1.23903	0.948802										0.19161	0.265486	0.428984
	0.540522	1.46065	2.06013										0.681249	0.20715	0.295666
	0.142495	0.221304	0.249556										0.451779	0.0580232	0.446731
	0.101483	0.95795	0.382831										0.472778	0.273974	0.830642
	1.20571	0.59866	0.456993										0.203486	0.133963	2.40211
	0.868136	2.3815	0.358214										0.632328	0.31434	0.415049
	1.41379	0.246052	0.458012										0.277042	0.499223	0.695352
	0.282637	0.830459	0.740243										0.637272	0.297704	0.998402
	0.0808057	1.72689	0.310495										0.0928299	0.293067	0.159352
	0.807487	0.281151	0.312141										0.208346	0.836504	0.578202
	0.130407	0.167908	0.255968										0.921633	0.27084	0.53456
	0.308481	1.20157	0.134248										0.141051	0.624992	0.385943
	0.352351	1.0441	0.493333										0.296226	0.324197	0.20957
	0.785918	0.573565	0.16549										0.16507	0.856558	0.620978
	0.541899	0.166458	0.616227										0.712144	0.24035	0.536073
	0.158989	2.34845	0.38196										0.98899	0.23859	0.602001
	0.841302	0.963396	0.959967										0.515696	0.251122	0.141136
	0.284464	0.917121	0.818642										0.118086	0.748268	0.643435
	0.18179	0.59908	0.785172										0.361833	0.173968	1.10653
	0.149243	1.43345	1.20221										1.64948	0.190035	0.591731
	0.436731	0.893904	0.129528										0.422878	1.67243	0.294681
	0.217879	0.443187	0.61708										0.553894	0.223996	0.91084
	0.575359	0.557443	0.215449										0.405075	0.681487	0.1868
	0.765783	0.416713	0.499014										0.310644	0.760102	0.428833
	0.80376	0.253538	0.608359										0.256877	0.498922	0.503347
	0.290861	0.355269	0.181733										0.121596	1.64586	0.798127
	0.170764	0.58149	0.554823										0.185377	0.321644	0.405512
	0.531433	0.0163379	0.401958										0.0310344	0.507825	0.27618
	0.240913	0.0649662	0.377078										2.16088	0.0675761	0.329232
	0.635539	0.0764126	0.132046										0.184433	0.295728	0.753718
	0.463954	0.43273	0.180621										0.85162	0.63331	1.46953
	0.315949	0.736166	0.462369										0.341882	0.376699	0.753903
	0.255886	0.0446232	0.326191										0.357905	0.484965	0.923364
	0.558617	0.778439	0.868677										0.914031	0.56534	0.128957
	1.78924	0.274947	0.813222										0.787435	0.553297	0.248774
	0.458373	0.823663	0.530772										0.159627	0.50418	0.754595
	0.53336	0.748047	0.854195										0.45606	0.257751	0.85456
	0.422544	1.2118	0.469005										0.150433	0.462681	0.347909
	0.401722	0.670467	1.0251										1.13487	0.156981	0.0314672
	0.284745	0.0379917	1.44586										0.2245	0.284429	0.505298
	1.03811	0.310268	0.412922										0.344636	0.305843	0.29124
	3.26081	0.368981	0.325664										0.532116	0.299306	0.618007
	0.606284	0.382054	0.834711										0.48769	0.412967	1.57012
	0.330855	0.0545004	0.3473										0.997993	0.375277	0.329053
	0.574816	0.659121	0.362121										0.782344	0.475936	0.820254
	1.64049	0.0172611	0.164181										0.794316	1.02542	0.778855
	0.706274	0.278183	1.27279										0.583245	0.599999	0.171297
	0.63157	0.861019	0.964477										0.290764	1.16092	1.89773
	0.114931	1.20055	1.17214										0.182385	0.323974	0.949728
	0.938777	0.493436	0.450983										0.763148	0.509254	0.711872
	0.542529	0.459717	0.55118										0.536027	0.453401	0.169603
	0.538912	0.0602304	0.49409										1.29024	0.137742	0.650252
	0.682051	1.15081	0.948494										0.619134	0.409054	0.274464
	0.121433	0.942377	0.412529										0.199417	0.33782	0.373539
	0.397772	0.562027	0.512709										0.296787	0.193616	1.41674
	0.25242	0.548254	1.219										0.388949	0.305798	0.386083
	0.297946	0.173339	1.32534										0.611483	1.16923	0.308336
	0.661092	0.534503	1.71742										0.557157	0.243032	0.816196
	0.440412	0.446186	0.204889										0.31856	0.279757	0.272381
	0.588261	0.361352	1.59792										0.293688	0.131966	1.47246
	0.169025	0.940172	0.731283										0.0442444	0.309839	0.485909
	0.520574	1.27286	0.679885										0.95269	0.898348	0.170435
	0.58049	0.135465	0.602941										0.325652	0.738772	1.36133
	0.375746		0.248454										0.303519	0.32907	0.521102
	0.788931		1.76349										0.270326	0.245609	1.35479
	0.892698		1.473										0.386684	0.289502	0.30618
	1.0413		0.377634										0.505056	0.11991	1.0131
	0.739107		0.435024										0.647838	1.10425	1.49706
	0.0889466		0.76581										0.354117	0.311895	0.640407
	1.32232		0.643442										0.603685	0.189272	0.635749
	0.270217		0.83681										0.19282	0.181169	1.33019
	0.672504		0.381659										0.267618	0.158005	0.106162
	0.480334		0.981929										0.31925	0.533351	0.33395
	0.512368		0.08514										0.0825289	0.0578831	1.30438
	0.454827		1.64889										0.280217	0.40347	0.543414
	1.19856		1.41257										0.317366	0.143175	0.170019
	0.424658		1.26723										0.284191	1.34997	0.489381
	0.276388		0.20945										0.42952	0.375772	1.32212
	0.395881		1.18606										1.7607	0.215986	1.42664
	0.020355		0.161783										0.386136	0.16495	0.862078
	0.261393		0.486107										0.359482	0.204096	0.172079
	0.762174		0.603701										0.0626303	0.367403	0.603683
	0.126238		0.814079										0.311723	0.149095	1.4452
	0.284891		2.15867										0.242515	0.398309	0.245937
	0.471244		0.710852										1.01327	0.235038	0.292387
	0.197751		2.22573										0.0493022	0.0792618	0.440661
	0.334827		2.77851										0.74923	0.270747	4.99843
	0.194038		0.694907										0.400076	0.12462	0.377731
	0.448323		0.494078										0.263532	0.801098	0.0611995
	0.251412		0.417435										0.0466726	0.0255019	0.574962
	0.30339		0.418872										0.409242	0.421019	0.143342
	0.0580569		0.414617										0.0481318	0.192815	0.751764
	0.0721122		0.540617										0.194413	0.290349	0.0756088
	0.427858		0.308443										0.0888034	0.330285	0.379995
	0.274686		0.710503										0.229793	0.523151	0.806288
	0.0985374		0.353071										0.0533532	0.348544	0.0438202
	0.292834		0.743624										0.384314	0.71708	0.217288
	0.111555		0.671315										0.267645	1.23584	0.535145
	0.222233		0.148185										0.16791	0.28976	0.524912
	0.0884957		0.822173										1.4219	1.69289	0.522646
	0.233713		1.29771										0.186832	0.282424	0.762328
	0.0515329		0.28856										0.844012	1.36489	0.33635
	0.0853674		0.619582										0.129663	0.53812	0.217416
	0.189263		1.18574										0.430775	0.277429	0.465841
	0.246139		0.340535										0.186371	0.935586	0.686915
	0.312574		0.36088										0.10367	0.474249	0.449115
	0.412048		1.1572										0.309566	0.182152	0.64773
	0.295774		0.849446										0.424115	0.646927	0.322008
	0.776738		0.80925										0.133118	3.05289	0.25916
	0.472374		0.309103										0.301174	0.607664	0.834734
	0.242996		0.106113										0.700241	0.485234	0.217414
	1.01611		0.459836										1.0968	0.270112	0.274858
	0.360085		0.324528										0.223	0.356845	0.0349562
	1.09741		0.277612										0.321883	0.248535	0.91873
	0.552211		0.369367										0.0490713	0.121432	0.766141
	0.196364		0.498376										0.687858	0.334967	0.328524
	0.180281												0.0620337	0.150266	0.40145
	0.605949												0.565558	0.37852	0.11
	0.790404												0.305816	0.310441	1.25011
	0.877298												0.0665942	0.344406	0.1602
	0.985899												0.716134	0.246818	0.367008
	0.639447												0.261282	0.803654	0.197228
	0.0861132												0.315059	0.396804	0.276705
	0.249635												0.314471	0.0402241	0.61368
	0.63696												0.220982	0.104032	0.275712
	0.836948												1.10428	0.193953	0.0595859
	0.0653013												0.0998057	0.0514792	0.518804
	0.116697												0.171566	0.435911	0.202616
	0.26169												0.268612	0.137458	0.637901
	0.387142												0.392386	0.197731	0.426296
	1.19623												0.193633	0.802636	0.177772
	0.58731												0.908634	0.226285	0.452784
	0.672953												0.199413	0.849133	0.69364
	0.269541												0.396013	0.342584	0.153521
	0.251366												0.505748	0.667188	0.205809
	1.46896												0.36872	0.489567	0.923411
	0.413769												0.0801162	0.118953	0.421716
	0.260694												0.310101	0.682779	0.217918
	0.962306												0.292892	0.380398	0.121146
	0.071377												0.980787	0.0809929	0.593767
	0.306745												0.402135	0.114444	0.167617
	0.191869												0.527991	0.524772	0.539218
	0.244186												0.612069	0.444412	0.144659
	0.511957												0.822372	0.290707	0.551689
	0.276822												0.204376	0.193448	0.261603
	0.499871												0.609338	0.296234	0.949515
	0.478905												0.318397	0.470174	0.115797
	0.96877												0.408706	0.179342	0.436787
	0.560187												0.25589	0.907273	0.238661
	1.13321												0.855973	0.131141	0.266036
	0.840583												0.0626161	0.222971	0.275064
	2.03865												0.186275	0.423118	0.317722
	0.126411												0.306571	0.127263	0.495668
	0.746842												0.162741	0.25716	0.425078
	0.121838												0.448441	0.427681	0.673776
	0.652572												0.540987	0.752139	0.311191
	0.177569												0.0530937	0.667592	0.538476
	0.365788												0.526344	0.458654	0.180463
	0.486075												0.105442	0.228015	0.305034
	0.657372												0.453015	0.528798	0.730276
	1.13436												0.20436	0.461524	0.532409
	0.701164												0.543541	0.456633	0.483845
	0.431709												0.251416	1.26938	0.413497
	0.507411												0.108889	0.538362	0.274308
	0.088457												0.182266	0.959918	2.50971
	0.137905												0.507294	0.523043	0.318931
	0.526012												0.0429141	0.733466	0.308552
	0.339065												0.270866	0.271447	0.918457
	0.894414												0.227181	0.500594	0.34549
	0.158541												0.072374	0.349249	0.4975
	0.582691												0.457752	0.176062	0.117367
	0.510804												0.345938	0.108677	0.409942
	0.206295												0.564158	0.145615	0.536817
	0.240266												0.286386	0.429348	0.0855517
	0.498011												1.45945	0.258461	0.207396
	1.06834												0.380487	0.381763	0.627485
	0.604683												0.0990808	0.433413	0.25187
	0.838119												0.351461	1.24032	1.30628
	0.997037												0.0617729	0.303839	0.140003
	0.583607												0.871363	0.163253	0.313938
	0.143057												0.205829	0.298078	0.638959
	0.433226												0.215826	0.497934	0.430071
	0.101872												0.959542	0.205067	0.470113
	0.329752												0.810746	0.628644	2.28451
	0.159068												0.384888	0.620934	0.128099
	1.35202												0.243899	1.98313	0.306439
	0.404734												0.473507	1.21097	0.69909
	0.656595												0.392416	0.739083	0.310862
	0.724418												0.462299	1.74818	0.266543
	0.0644945												0.140661	0.731555	0.351713
	0.0936626												0.160812	0.431433	0.265547
	0.30515												0.354311	0.469062	0.111117
	0.0864495												0.581831	0.619798	0.0659389
	0.433827												0.124605	0.242332	0.553971
	0.148601												0.178662	0.995945	1.29584
	0.247392												0.0659807	1.66238	0.457836
	0.201325												0.25009	2.84823	0.28367
	0.317103												0.580414	1.11369	0.270364
	0.126924												1.60221	0.84158	0.0432457
	0.242616												0.221995	0.165281
	0.223879												0.404237	0.174843
	0.1457												1.10926	1.09153
	0.445946												0.260505	0.477637
	0.0852964												0.255025	1.56705
	0.683043												0.0862585	1.35672
	0.356121												1.6309	0.318714
	0.198305												0.557069	0.663774
	0.487992												0.424465	1.36255
	0.340949												0.563149	0.266572
	0.618979												0.206548	1.53207
	0.634825												0.249003	0.807647
	0.50639												0.302211	0.473891
	0.232671												0.104509	0.774783
	0.704947												0.168821	0.660398
	0.115419												0.476345	0.249909
	0.553834												0.0669264	1.80528
	0.314918												0.359055	1.8807
	0.0876567												0.398803	0.195379
	0.150252												0.305295	3.40882
	0.69214												0.0989601	0.749336
	1.017												0.80489	1.17726
	0.325185												0.0754713	0.256531
	0.658934												0.128808	0.376193
	0.230111												0.187597	0.343072
	0.114897												0.233963	0.563003
	0.740984												0.233376	0.230231
	0.296686												0.252165	0.19265
	0.357022												0.655357	0.401592
	0.152344												0.143611	0.263916
	0.381459												0.325487	0.696592
	0.567994												0.206411	0.205495
	0.391354												0.148637	0.296086
	0.621954												0.312412	0.125679
	0.398519												0.220075	0.177065
	0.577477												0.617415	0.328713
	0.582097												0.20527	0.248853
	0.336045												0.905359	0.627435
	1.81508												0.0344231	0.218183
	0.505583												0.00941315	0.0749266
	0.270823												0.707022	1.42111
	0.65365												0.0222933	0.2836
	0.627583												0.507037	0.142199
	0.495652												0.00827322	1.3352
	0.407921												0.0774295	2.1215
	0.600425												0.344587	0.290222
	1.66592												1.06046	0.998711
	0.403662												0.657089	0.235637
	0.911327												0.325394	1.07563
	0.463319												0.386276	0.306566
	0.19813												0.227658	1.50318
	0.693314												0.192661	0.053915
	0.909767												0.501431	0.0330793
	0.141179												0.536621	0.530839
	0.788671												0.364292	0.0970266
	0.638794												0.0652194	0.20026
	0.558295												0.347912	0.829553
	0.230088												0.0468459	0.0356597
	0.438321												0.637826	0.647836
	0.823485												0.45913	0.293255
	0.610299												0.15893	0.455637
	0.192966												0.0823449	0.248841
	0.574495												0.577151	0.573566
	0.382562												0.402759	0.253229
	0.357799												0.280049	0.546656
	0.66866												0.19956	0.231551
	0.194262												0.275715	0.707141
	0.142372												0.239361	0.504186
	0.630956												0.116623	0.131103
	0.0407875												0.373622	0.242315
	0.190784												0.448875	0.268086
	1.61442												0.209858	0.184396
	0.107832												0.344065	0.229685
	0.202304												0.461317	0.278893
	0.641228												0.347414	0.63905
	0.365936												0.337072	0.180164
	0.465118												0.18005	0.0976584
	0.105372												0.313026	0.412451
	0.112725												0.990833	0.526203
	0.153951												0.946552	0.482788
	0.183477												0.460447	0.202845
	0.148555												0.538555	0.253868
	0.677205												0.447099	0.798159
	0.356604												0.452886	0.27604
	0.348461												0.534391	0.302173
	0.962062												0.533355	0.193579
	0.681567												0.310188	0.0754301
	0.20425												0.423696	0.653011
	0.280004												0.434489	0.472283
	0.155128												0.440768	0.303706
	0.203281												0.202515	0.455212
	0.0960995												0.534219	0.393526
	0.196309												0.323133	0.262536
	0.384502												0.16928	0.318643
	0.665504												0.93505	0.767128
	1.55031												0.0660258	0.908789
	0.805675												0.571445	0.0572627
	0.59884												0.43879	0.877238
	0.420678												0.293763	0.127962
	0.533688												0.663508	0.321532
	0.272548												1.62707	0.305144
	0.845241												0.281997	0.147234
	0.606187												0.360948	0.193988
	0.846052												0.449056	0.265022
	0.1433												1.1831	0.55308
	0.714804												0.190156	0.0563821
	0.251874												0.866901	0.56881
	0.622543												0.182621	0.497807
	0.36553												0.28079	0.294601
	0.843778												0.196579	0.853574
	0.174313												0.410086	0.241917
	0.439342												0.534017	0.634766
	0.287577												0.316883	0.746151
	0.585955												0.553043	0.242039
	0.607648												1.09267	0.0945762
	0.171651												0.720724	0.476306
	0.686593												0.137145	0.248144
	0.674048												0.0532549	1.22167
	0.727523												0.225432	0.464715
	0.701138												0.295234	0.430597
	0.646317												0.73789	0.389274
	0.862671												0.0547052	0.387281
	0.504592												0.890143	0.268401
	0.712705												0.515873	0.554716
	0.76694												0.519575	0.108339
	1.58275												0.833817	0.147369
	0.293024												0.76995	0.523328
	0.172752												0.499335	0.350358
	0.452058												0.476595	0.373871
	0.937048												0.461317	0.700227
	1.14144												0.879244	0.807983
	0.567828												0.0850709	0.0852144
	0.331333												0.559948	0.415986
	0.286721												0.479781	0.471935
	1.62568												0.483492	0.555494
	0.0947876												0.967074	0.189428
	0.720562												0.800166	0.440084
	0.487436												0.742889	0.0655117
	0.394884												0.1595	0.370866
	0.915389												1.27782	0.351266
	0.225923												1.01793	0.501865
	0.523162												0.857351	0.662889
	0.277879												0.204287	0.338395
	0.308892												0.461696	1.39057
	0.521319												0.201123	0.19938
	0.379827												0.32642	0.415458
	0.449964												0.229178	0.561773
	0.0208914												1.02632	0.0944068
	0.584836												0.807103	0.352446
	0.175783												0.256813	0.222126
	0.851619												0.264314	0.284685
	0.717607												0.575387	0.113338
	0.509372												0.276429	0.235915
	0.445682												0.424391	0.174997
	0.370902												0.128932	2.15523
	2.60911												0.282194	0.488052
	0.392273												0.448343	0.18941
	0.845758												0.294352	0.739685
	0.26035												0.317421	0.255542
	0.574218												0.0877742	1.1115
	0.279293												0.802111	0.418014
	0.693628												0.23605	1.3444
	0.723324												0.213063	0.298553
	1.69711												0.327647	0.0776048
	0.52298												0.299532	0.276174
	0.268906												0.285809	0.512918
	0.898063												0.356434	0.338795
	0.513235												0.92211	0.0803738
	0.90748												1.0839	0.925177
	0.538433												0.62382	0.532361
	0.638292												1.21746	0.204368
	0.15028												0.892308	0.518108
	0.672458												0.202487	0.453554
	0.555726												0.562483	0.102519
	0.344992												0.137661	0.451991
	0.109587												0.170476	0.911466
	0.330772												0.167797	0.365933
	0.581235												0.114808	0.327359
	0.36763												0.1206	1.71741
	0.836055												0.786943	0.680263
	0.191206												0.124591	0.285893
	0.426827												0.195145	0.303068
	0.180088												0.106308	0.63786
	0.541303												0.164284	0.538634
	1.01419												0.756878	0.275394
	0.230406												0.598389	0.264875
	0.453635												0.222854	0.0974122
	0.824943												0.627646	0.204582
	0.368599												0.0882833	0.623957
	0.316715												0.0947605	0.930565
	0.179397												0.175769	0.603992
	0.231369												0.251717	0.206103
	0.538044												0.220653	0.417251
	0.231385												0.229038	0.472568
	1.19472												0.194124	0.401401
	0.332155												0.238778	0.3255
	0.385053												0.134898	0.417138
	0.29388												0.896942	0.143149
	0.400055												0.102163	0.210402
	0.647467												0.740332	0.307538
	0.745911												0.0572359	0.159859
	0.284057												0.249688	1.19935
	0.117995												0.0507997	0.595209
	0.592427												0.0707039	0.272084
	1.79691												0.43091	0.445342
	0.0914105												0.814809	0.330308
	0.771936												0.283013	0.828259
	0.430545												0.139373	0.3633
	0.377371												0.0624368	0.527194
	0.45343												0.222728	0.881034
	0.413944												0.362124	0.698015
	0.385526												0.617445	0.453
	0.210627												0.770572	0.510924
	0.315858												0.168947	0.818127
	0.236275												1.1302	0.708223
	1.01881												0.198966	0.358014
	0.479771												0.769703	0.619622
	0.212312												0.260858	0.12505
	0.429549												0.0350003	1.93475
	0.288247												0.168746	0.274296
	0.404048												0.0533344	0.700261
	0.464247												0.122434	0.400959
	0.429369												0.361158	0.587118
	0.0664722												0.107434	3.45624
	0.276301												0.185561	0.511043
	1.02235												0.259065	0.970903
	0.355826												0.429321	0.244006
	0.174233												0.308725	0.507274
	0.282212												0.472726	0.415452
	0.142477												0.386553	0.205427
	0.475874												1.18368	0.0182948
	0.647557												0.413495	0.11352
	0.27978												0.0548354	0.185845
	0.88217												0.113282	0.0487764
	0.43883												0.0372736	0.16719
	0.338141												0.46376	0.11719
	0.482385												0.0813558	0.323315
	0.355455												0.0510077	1.33855
	0.640071												0.397937	0.373751
	0.383597												0.50243	0.14048
	0.340925												0.192625	0.0403437
	0.557759												0.579201	0.162346
	0.726581												0.268727	0.357053
	0.610151												0.364485	0.257092
	0.156107												0.607547	2.14226
	0.501167												0.0887885	0.0472342
	0.580854												0.209092	0.282951
	0.844017												0.177707	0.0676159
	0.412735												0.177953	0.260358
	0.429609												0.363601	0.477892
	0.329297												0.188038	0.3933
	0.492215												0.273037	0.145044
	0.315852												0.286303	0.552942
	0.160198												0.341726	0.906026
	0.244162												0.347156	0.0471265
	0.885603												0.123647	0.376492
	1.42646												0.0859082	0.225582
	0.483087												0.301203	0.403646
	0.326577												0.306374	1.37255
	0.408433												0.119073	0.129885
	1.04119												0.247364	0.347734
	0.662677												0.368307	0.107024
	0.641215												0.0411554	0.345091
	0.466745												0.681563	0.616556
	1.25464												1.18408	0.501772
	0.580203												0.884037	0.390126
	1.07661												0.234749	0.153676
	1.35573												0.273	0.333406
	0.152345												0.513189	0.213385
	0.244895												0.497142	0.396681
	0.403731												0.283813	0.337989
	0.181151												0.144327	2.95925
	0.225874												0.451207	3.52425
	1.99876												0.0519778	0.813093
	0.397333												0.229012	0.223151
	1.58733												0.405198	0.370528
	0.591707												1.27336	0.614261
	0.268153												2.55224	0.0308509
	0.25501												0.378515	0.356439
	0.372572												0.672214	0.22332
	0.283089												0.262694	1.5173
	0.197833												0.349008	0.087682
	0.520061												0.232706	0.109078
	0.370801												0.429983	0.135242
	0.363568												0.49603	0.500859
	0.0952484												0.2092	0.574818
	0.0781547												0.490159	0.338504
	1.44785												0.784673	0.216964
	0.358809												0.891279	0.216561
	0.820364												0.333556	0.372205
	0.542532												0.36359	0.247429
	0.521242												0.273461	0.845951
	0.447789												0.38841	0.526458
	0.434718												1.50243	0.700752
	0.506669												0.351692	0.163551
	0.612414												0.414549	0.117993
	0.291282												0.241828	0.725626
	0.501397												1.15067	0.253821
	0.710688												0.384666	1.21377
	0.549286												0.36344	0.536536
	0.28442												0.304478	0.191049
	0.574118												0.316064	1.06575
	0.235903												0.103866	0.395925
	0.437613												0.806133	0.961751
	0.236864												0.340379	0.291773
	0.266427												0.354644	0.854617
	3.16517												0.424177	0.258288
	0.477778												1.10598	0.153162
	0.541002												0.239424	0.785837
	0.537447												0.238161	0.129101
	0.407059												0.16925	0.174704
	0.323084												0.547543	0.288999
	0.353105												0.201517	0.191763
	0.218035												0.417584	0.46619
	0.483227												0.229731	2.07266
	0.263342												0.0482305	0.331993
	0.346508												0.351956	1.92295
	0.875581												0.435633	0.128744
	0.263779												0.125051	0.302262
	0.542132												0.488611	0.509455
	0.300842												0.642261	0.654032
	0.464455												0.288072	0.291698
	0.302757												0.206104	0.199797
	0.428317												3.93173	0.368742
	1.21141												0.453056	0.838853
	0.958998												0.878738	0.623971
	0.419282												0.16085	0.30171
	0.939526												0.585767	0.254633
	0.402863												0.0812115	0.150894
	0.942591												0.238679	0.335627
	0.0907087												0.301208	0.572007
	1.99705												0.128823	0.142347
	0.319104												0.469902	1.08135
	0.381876												0.404169	0.440175
	0.261111												0.0683781	0.603341
	0.365526												0.220301	0.325686
	0.330568												0.28544	0.562073
	0.674813												0.236383	0.469035
	1.70927												0.23337	0.794348
	0.546722												2.27894	0.567418
	0.418225												0.590006	0.202122
	0.459669													0.0982924
	0.219911													0.643232
	0.13042													0.489629
	0.487269													0.236698
	0.250062													0.716861
	0.219854													1.5138
	0.366352													0.670748
	0.304706													0.182225
	0.444376													0.875533
	0.49241													0.605648
	0.335343													0.77082
	1.66368													0.297491
	0.613935													0.68956
	0.588992													1.35682
	0.674651													0.372197
	0.126553													0.366215
	0.85779													0.681432
	2.53381													0.394469
	0.156699													0.638148
	0.511995													0.584074
	0.433292													0.447822
	0.337192													0.768349
	0.0613601													1.11635
	0.776871													0.470096
	0.348355													0.151723
	1.04086													0.398226
	0.125822													0.596421
	0.842076													1.19346
	0.710025													1.10898
	0.710057													0.687341
	0.703988													0.448109
	0.411141													1.08702
	0.482454													0.192612
	0.165764													1.27755
	0.331259													1.2595
	0.0515124													0.381503
	0.0886637													0.193581
	0.604854													0.628939
	0.253573													0.955203
	0.326147													0.116714
	1.07401													0.401994
	0.619445													0.188306
	0.258027													0.346145
	0.270139													1.55634
	0.690221													0.341221
	0.22881													1.43999
	0.658243													0.302717
	0.111747													0.123554
	0.0942414													0.452948
	2.65766													0.614481
														0.314483
														0.924707
														0.389217
														0.0839946
														0.038749
														0.302875
														0.196964
														0.591694
														0.190064
														0.249083
														0.278383
														0.282516
														1.86534
														0.264588
														0.781376
														0.0809966
														0.840305
														0.207423
														1.1241
														0.273537
														0.656325
														0.898006
														0.264558
														0.700605
														1.22581
														0.316907
														0.181813
