# Supplementary material for: Control of nuclear size by osmotic forces in Schizosaccharomyces pombe
Source: eLife. 2022 Jul 20;11:e76075. doi: 10.7554/eLife.76075 (PMC9410708; doi:10.7554/eLife.76075)
Supplement: Figure 6—source data 3. — Related to Figure 6G. [file elife-76075-fig6-data3.xlsx]

## Sheet: Sheet1
Time	0 min	15 min	30 min	60 min
	0.9359138011814303	0.9328059528176842	1.1219042082642108	1.062172734709942
	0.9589189953314154	1.0311691734746433	1.1141419941021768	1.1439345274664345
	1.052398953462752	0.9267556362518433	1.1062629452037227	1.0721694946090992
	0.9784850561028147	0.8692573337640481	0.9847983321246794	0.9469297088336924
	1.0797377317061934	1.1554240356522345	1.029168147254937	1.0520082961393822
	0.9604511449777715	1.0454148425395653	1.1348350870067925	1.0715160973985507
	1.1709816542227356	0.9965288219383176	1.049479342925679	1.040800479737529
	1.0780866362001038	1.0483549254584545	1.126326255794605	0.9560595016405328
	0.9834389726358799	0.9631743299758274	0.9679786339474703	0.9108417802375991
	1.0638342460077734	1.166062375938285	0.9661190019063234	1.2017122055483505
	0.9517485184514419	1.174986960305909	1.042820425426365	1.074604599356313
	1.0553522228156424	1.0921931172166246	1.1219042082642108	1.0357461725165038
	1.0609453461828322	1.0233046597167301	1.1141419941021768	0.9413864022103515
	0.9981947932296418	1.0840550373619586	1.1062629452037227	1.0282971289215332
	0.9923830503700711	0.9323297002038696	0.9847983321246794	0.9714879187035722
	0.976573863615993	1.021894082260817	1.029168147254937	1.027060071996689
	0.9723594389994733	1.0696887860458826	1.049479342925679	1.1552685745722049
	1.0403747254307303	1.0232174064446393	1.126326255794605	1.1008975779423367
	1.0834126762704759	1.1069455767560592	0.9679786339474703	1.0590512965177528
	0.979725156208666	0.9194833264218427	1.042820425426365	1.0127571738241667
	1.0196231180165338	0.9347052103492149	0.9316063444676164	1.103443721425507
	1.0188511608796267	0.8537677995411602	1.0407255307976566	0.9810032214256263
	1.0238136472888333	1.0367199460581693	0.9702083901974934	1.0293130949918394
	0.9177980360547132	1.023849672935375	1.026840959891203	1.0278581429825953
	0.8720353438545317	1.08408426620348	1.0764884131827368	0.9741031597128318
	1.0698183443293672	1.0408594041853858	0.9968423324825575	1.0041264529217653
	0.9973763003512895	1.0683832162359501	1.0873136693470018	1.1417971061910654
	0.837411650864863	0.9398712269485288	1.1514301076352194	1.12685689709076
	1.1872251581371542	0.8226213636254176	1.2206197701185946	1.065162138669395
	1.0954047513187697	0.974842019993456	1.0072745036198605	0.981119304869623
	1.0993106907965606	1.2771693964917712	1.032313324461321	0.9749403066856949
	0.982982081473785	1.0047219607258837	0.9430550047660956	1.0980363135123536
	0.8741256351774525	1.004352092358623	1.1091054568252154	1.0571960253206227
	0.9361963582557912	1.0005451834346624	1.0550826893225282	1.0141585780245423
	0.9683213884703863	1.111126945677335	0.947556589235803	0.9735195288314183
	0.9597587990862224	1.1808026807212313	1.107103556730963	1.0671355271290341
	0.9376708863762141	1.0426017580646785	0.9650800905110712	0.9407808287694998
	0.9936170988994825	1.031810239495012	0.8759789801209178	0.933487164715989
	0.9993478069628317	0.95136109199923	1.1058993676741213	1.0407616438899447
	1.120050445303626	1.0065868074091973	1.2065774058840832	1.254016353282413
	0.9630010347779043	1.0296922887684685	1.0759455216718883	0.9915472347782222
	0.9817492993806626		0.9782884100993648	1.0109258319455514
	0.9331951372602884		0.9951620905691281	1.072907333453708
	0.9236215759317672		0.9170811610911307	1.1365089621113122
	0.9553785922043782		1.0010566102517995	0.9956688897262063
	1.0214874206467297		1.1171243242400088	0.9772942495099268
	0.9433623327467173		1.1125622040032574	0.9431335726342522
	0.9224100862811719		0.9913390897992904	1.0198957942463125
	0.9373015511311901		1.1795265247363045	0.9367221760767018
	1.2123716415553456		0.9897251486890984	1.1061745446185227
	1.000194145997261		1.0038439511237685
	1.041542988945068		1.0275296216312257
	1.0161426010846162		0.9449437785029194
	0.9872106947061641		1.0543217470103698
	1.0908773784212582		1.0927102080074853
	0.9973740636311308		1.1260128140414534
	1.098915400516713		1.0087537181777528
	0.994373428220935		1.0451675735767911
	0.9476450978812506		0.9763644728460225
	0.9704429604877566		0.8694851850019233
	0.9293905455800117		0.8910599202994627
	0.9323626151924125		0.9664267973385067
	1.1224127866461242		0.8872500540834116
	1.0242598628632664		1.0313942775015938
			0.9581337923572492
			1.016533240729336
			0.8845917040474796
			0.9796519063358151
			1.0002594002085083
			1.0460984407447644
			1.0978064837370483
			0.9883565231673005
			1.0872365202556993
			0.9973988547298603
			1.1605723888222577
			1.065626404154753
			1.0657908835984606
			0.8962096906188688
			0.9673941056912249
			1.1045702288966577
			0.9726688079709592
			0.9439682495715565
			1.0132804282852672
			1.0852721503956912
			1.0261592832188642
			1.0834343446578807
			1.1952422243290952
			1.0153947763646054
			1.006613038159654
			0.9457781235850875
			0.9309211643561818
			0.9155832689829749
