# Supplementary material for: Control of nuclear size by osmotic forces in Schizosaccharomyces pombe
Source: eLife. 2022 Jul 20;11:e76075. doi: 10.7554/eLife.76075 (PMC9410708; doi:10.7554/eLife.76075)
Supplement: Figure 6—source data 4. — Related to Figure 6H. [file elife-76075-fig6-data4.xlsx]

## Sheet: Sheet1
Cytoplasm	0 min	15 min	30 min	60 min		Nucleoplasm	0 min	15 min	30 min	60 min
	1.01539	0.922547	0.835579	0.783471			1.03529	0.990909	0.981919	0.818859
	0.92785	0.975342	0.751808	0.673202			0.945735	1.01642	0.892146	0.760625
	0.867979	0.918276	0.850473	0.751086			0.993665	1.08787	0.91216	0.740255
	0.960724	0.914526	0.865303	0.754049			0.923017	1.03291	0.764924	0.888918
	1.00957	0.899899	0.84188	0.741271			0.954898	0.996768	0.946199	0.735359
	1.02026	0.996215	0.919388	0.844477			1.15765	0.970562	1.06311	0.863543
	1.04512	0.950338	0.768703	0.829425			1.18008	0.852098	0.916734	0.896622
	0.959639	0.938823	0.864975	0.823247			0.95657	0.897801	0.846728	0.81504
	1.07618	0.868486	0.755023	0.669326			1.09328	0.872109	0.861447	0.811363
	0.947461	0.921682	0.791386	0.763449			0.904037	0.903458	0.737503	0.81396
	0.978475	1.07976	0.815836	0.853208			0.966271	1.12542	0.859688	1.01431
	0.860412	0.899994	0.863105	0.780895			0.867715	0.904961	0.999027	0.939255
	0.888253	0.863173	0.878639	0.793293			0.849653	1.00366	0.919933	0.927473
	1.03735	0.979907	0.851494	0.853664			1.12448	0.938453	0.895457	0.931577
	1.10244	1.00942	0.830416	0.458877			1.17935	1.0053	0.893665	0.460437
	0.964286	0.950176	0.901027	0.439556			1.02302	1.00516	0.934742	0.466924
	1.05005	0.930653	0.811613	0.512423			1.0594	1.00126	0.81009	0.554796
	0.967073	0.889289	0.802272	0.482028			0.863336	0.960771	0.847179	0.514354
	1.01656	0.934299	0.939193	0.470154			0.971599	1.00175	0.941083	0.530675
	0.976659	1.09005	0.77594	0.508214			0.989289	1.04624	0.879186	0.522601
	1.03188	0.980087	0.859447	0.396226			0.964734	0.996505	0.931475	0.442146
	0.977978	0.941017	0.897393	0.495826			0.98495	1.00083	0.936688	0.566275
	1.09404	0.824177	0.802185	0.502396			1.10677	0.973531	0.880811	0.591001
	1.15399	1.03182	0.943275	0.435433			1.08518	1.03908	0.847097	0.501016
	0.991846	1.01363	0.778188	0.535252			0.941166	1.00584	0.906293	0.573844
	1.08789	0.82062	0.847952	0.455077			1.02644	0.884262	0.936936	0.506111
	1.10662	0.884482	0.917636	0.516613			1.02187	0.990697	0.93311	0.569243
	0.952032	0.836905	0.80384	0.463414			1.03116	0.934861	0.886553	0.531199
	1.16894	0.999754	0.744209	0.453257			1.14577	0.983273	0.878612	0.480824
	1.12213	0.904155	0.754495	0.460544			1.07389	0.899648	0.910396	0.566163
	0.944533	0.922547	0.877676	0.535421			0.870938	0.990909	0.981421	0.576602
	0.875185	0.975342	0.786695	0.472246			0.967228	1.01642	0.858214	0.568216
	0.825528	0.918276	0.879278	0.470855			0.905525	1.08787	0.879082	0.551935
	0.955397	0.914526	0.866863	0.486194			0.88903	1.03291	0.90701	0.542797
	0.885596	0.899899	0.793105	0.51493			0.864731	0.996768	0.984503	0.596605
	1.07001	0.996215	0.872237	0.520296			1.01497	0.970562	0.946741	0.593939
	0.976027	0.950338	0.751755	0.805355			0.947794	0.852098	0.929096	0.893952
	1.01258	0.938823	0.731837	0.86553			0.928217	0.897801	0.84427	0.937495
	0.899051	0.868486	0.692195	0.858964			0.930516	0.872109	0.796948	0.981208
	1.00514	0.921682	0.875647	0.905014			1.0492	0.903458	0.920188	0.905051
	0.969863	1.07976	0.912392	0.886056			1.01534	1.12542	0.792024	1.02062
	0.906011	0.899994	0.824538	0.819709			0.923999	0.904961	0.958447	0.955494
	1.1046	0.863173	0.945817	0.83317			1.1341	1.00366	0.892275	0.985018
	0.919611	0.979907	0.821967	0.780868			0.968436	0.938453	0.901947	0.815673
	1.0262	1.00942	0.965811	0.755031			1.04964	1.0053	0.927525	0.804968
	1.07321	0.950176	0.843089	0.784653			1.13029	1.00516	0.906001	0.928018
	0.949944	0.930653	0.921986	0.67398			0.879275	1.00126	0.995909	0.796223
	1.07106	0.889289	0.811746	0.923581			1.01683	0.960771	0.860955	1.06258
	1.0877	0.934299	0.819324	0.791009			1.0835	1.00175	0.891393	0.860179
	0.967263	1.09005	1.05982	0.824786			0.837731	1.04624	1.02897	0.993561
	0.981195	0.980087	0.914281	0.801284			0.932202	0.996505	0.974991	0.885096
	1.03775	0.941017	0.937346	0.751351			1.07206	1.00083	0.990438	0.802976
	0.94129		0.828492	0.742036			0.813526		1.0209	0.833694
	0.939918		0.804755	0.809789			0.908944		0.898223	0.797767
	1.1926		0.810559	0.813606			1.22422		0.873636	1.00464
	1.00401		0.901596	0.775337			1.09723		0.987792	0.851774
	1.0922		0.82427	0.77748			0.967922		1.01777	0.876949
	0.907864		0.995228	0.813979			1.01601		0.898607	0.99629
	1.00938		0.996792	0.87631			1.01106		0.989167	0.918002
	0.997447		0.981377	0.801945			0.943343		0.9714	0.78953
	1.10499		0.922686	0.692685			1.07396		0.879217	0.77235
	1.13769		0.839381	0.828953			1.01463		0.981658	0.978821
	0.978709		0.877809	0.770827			1.00838		0.763085	0.95374
	0.994243		0.936262	0.762944			0.949847		1.03094	0.865018
	0.945974		0.946272	0.870151			0.971868		1.00123	0.915098
	1.05378		0.938044	0.792415			1.11875		1.07209	0.997902
	0.949772		0.869025	0.812222			0.99099		1.02294	0.855888
	0.936295		0.925007	0.765345			1.11551		0.989722	0.92082
	0.969301		0.892244	0.676301			0.932907		0.975804	0.756407
	0.942028		0.913206				1.00909		0.926641
			0.921657						1.01972
			0.795785						0.806031
			0.800185						0.817343
			0.818372						0.982559
			0.880299						0.840385
			0.842295						0.920244
