# Supplementary material for: Control of nuclear size by osmotic forces in Schizosaccharomyces pombe
Source: eLife. 2022 Jul 20;11:e76075. doi: 10.7554/eLife.76075 (PMC9410708; doi:10.7554/eLife.76075)
Supplement: Figure 7—source data 1. — Related to Figure 7A, Figure 7—figure supplement 1. [file elife-76075-fig7-data1.xlsx]

## Sheet: Sheet1
Volume Cell	Volume Nucl	Vnc Ratio	Condition		Volume Cell	Volume Nucl	Vnc Ratio	Condition
122.60033	9.5462	7.786439074022068	pom1D		67.9065	5.079330000000001	7.479887786883436	WT
109.56087	6.71713	6.130957156510349	pom1D		69.14177	4.45132	6.437960729093282	WT
93.33074	7.221019999999999	7.737022121543233	pom1D		106.70147	7.504460000000001	7.033136469441331	WT
64.11409	4.7356	7.386207930269305	pom1D		97.72239	7.00789	7.171222480334342	WT
87.82441999999999	5.45541	6.211723345283692	pom1D		91.22657	7.6357	8.370039561939027	WT
132.05831	9.027389999999999	6.835912105796295	pom1D		118.99181000000002	8.3095	6.983253721411582	WT
124.38583999999999	8.191510000000001	6.585564723444406	pom1D		122.73451999999999	9.460980000000001	7.708491465970618	WT
150.39733999999999	8.87364	5.900130946464878	pom1D		158.93825	11.62054	7.311355196121763	WT
102.6779	6.825639999999999	6.647623295762768	pom1D		88.11827	7.03528	7.983906175189323	WT
85.99579	7.0939	8.249124753665265	pom1D		127.3049	7.3294	5.757358907630421	WT
110.24108999999999	5.9640699999999995	5.41002451989544	pom1D		65.36386	5.13214	7.851647684209591	WT
77.94237	7.60485	9.757016626515206	pom1D		55.3523	4.75666	8.593427915371176	WT
110.87825	9.37244	8.452911188623558	pom1D		90.66741999999999	7.58053	8.360809207982317	WT
58.541509999999995	4.56532	7.798432257726184	pom1D		96.31133	7.451160000000001	7.736535254990249	WT
99.88115	7.078010000000001	7.086432224699054	pom1D		89.21785	7.06601	7.919950996353309	WT
110.68393	7.04537	6.365305243498311	pom1D		136.32025	11.05044	8.106235133811742	WT
69.95713	6.267519999999999	8.959086800730674	pom1D		125.69386999999999	9.83382	7.823627357483702	WT
60.73884	6.92402	11.399657945393752	pom1D		59.50878	3.79389	6.375344949098268	WT
107.25145	6.39586	5.963425203109142	pom1D		55.21131999999999	3.92309	7.105589940613628	WT
111.08386999999999	9.7375	8.765899135491049	pom1D		95.98711999999999	7.09727	7.393981609199235	WT
86.05382	7.6022	8.834238851918485	pom1D		86.78943000000001	6.740889999999999	7.766948117990864	WT
111.9836	8.45551	7.550668133548127	pom1D		81.70071	6.10269	7.4695678899240905	WT
98.98213	6.8029399999999995	6.872897158305241	pom1D		76.82875	5.95167	7.746670354522232	WT
49.74711	6.399290000000001	12.863641727127467	pom1D		74.43266	5.65902	7.6028721800349475	WT
158.32931000000002	11.42676	7.217084442545728	pom1D		130.92543	9.792869999999999	7.479731019405472	WT
98.19207	6.080369999999999	6.192322862732193	pom1D		86.65231999999999	6.36108	7.340922897390401	WT
82.33664	7.532369999999999	9.14826011846002	pom1D		71.34366	5.60018	7.849583270608769	WT
166.26018	10.300130000000001	6.195187566860569	pom1D		78.41386999999999	5.16783	6.590453959229409	WT
108.53164	9.97821	9.193825874187473	pom1D		91.60213	7.24927	7.913866195032801	WT
135.43745	8.786	6.487127452562048	pom1D		80.57547	6.89233	8.553881224645664	WT
83.85285999999999	6.08744	7.25966890097726	pom1D		75.62956	5.861669999999999	7.750501259031521	WT
53.43675	4.7276	8.847094929987321	pom1D		59.37146	3.9807300000000003	6.704787114886514	WT
87.02873000000001	4.50744	5.179255172401113	pom1D		59.239540000000005	5.27991	8.912813975260441	WT
118.33056	9.33717	7.890751129716618	pom1D		96.20484	7.622089999999999	7.922771868858155	WT
121.89415	8.645380000000001	7.0925306915877435	pom1D		60.16091	4.02869	6.696524371057552	WT
39.90319	5.80333	14.543523963873564	pom1D		60.268809999999995	4.40874	7.315127011799303	WT
97.88038	7.003439999999999	7.155100950772769	pom1D		64.81184	5.08745	7.84956884421118	WT
70.0813	6.82868	9.743940252249887	pom1D		62.76724	4.8240300000000005	7.685585665388506	WT
97.15666999999999	7.57355	7.795193062915804	pom1D		77.71853	5.20482	6.697012926003618	WT
162.03926	10.564689999999999	6.519833526763821	pom1D		73.90841999999999	5.40828	7.317542439684139	WT
55.64476	6.79097	12.204150040363189	pom1D		94.74235	7.65637	8.081254053757373	WT
121.22541000000001	9.38813	7.7443582166478135	pom1D		95.23402	6.95051	7.298347796302204	WT
164.68793	9.35449	5.680130899696171	pom1D		133.28422	10.82594	8.122446903316836	WT
122.25544	6.96175	5.694429630288845	pom1D		97.92243	6.854830000000001	7.000265414165069	WT
84.8749	7.117560000000001	8.38594213365789	pom1D		96.08733000000001	6.938439999999999	7.220972837938152	WT
93.73835	5.35816	5.7160809849970695	pom1D		86.78963	6.6048	7.610125771938421	WT
93.88551	7.429710000000001	7.913585387138017	pom1D		69.60741999999999	5.289630000000001	7.599232955337235	WT
105.09071000000002	9.038739999999999	8.600893456709919	pom1D		70.05767	5.13028	7.322938373485729	WT
147.64146000000002	8.70017	5.892768874000567	pom1D		66.91759	5.2291	7.814238378877661	WT
96.83649	6.26389	6.468522351440041	pom1D		58.99119	4.0826199999999995	6.9207283324849005	WT
67.38043	7.03	10.433296433400617	pom1D		100.02622	7.49892	7.496954298582911	WT
50.09205	4.4846699999999995	8.9528577888108	pom1D		82.85488000000001	6.09096	7.351359388849516	WT
117.84085	10.52023	8.927489915424065	pom1D		147.88603	11.23098	7.59434816121577	WT
43.51103	6.13221	14.09346089945469	pom1D		138.04041999999998	10.500580000000001	7.606887895588844	WT
77.97813000000001	7.470510000000001	9.580263081456302	pom1D		94.64229	7.09987	7.501794388111277	WT
28.07392	4.65196	16.57039700903899	pom1D		91.56578	7.05001	7.699393812841435	WT
56.871480000000005	5.80995	10.215928968263178	pom1D		145.87292	11.808060000000001	8.094758094922623	WT
59.93167	4.54662	7.5863395763875765	pom1D		88.25268	6.98027	7.909414195693547	WT
71.31079	5.34725	7.498514600665622	pom1D		70.48021999999999	5.48439	7.781459819506809	WT
76.72198	6.32174	8.239802987357729	pom1D		108.35023000000001	6.97772	6.439967870857311	WT
88.42615	7.587280000000001	8.580357733543755	pom1D		72.60718	5.74563	7.913308298160045	WT
82.92011	6.41032	7.730718157513299	pom1D		102.38759	6.77734	6.619298295818858	WT
68.77338	5.08387	7.392206112306826	pom1D		95.11678	6.83995	7.1911076047780425	WT
89.22835	8.11793	9.097926836033613	pom1D		163.7845	12.16651	7.428364710946396	WT
72.05623	5.42296	7.526011283132632	pom1D		95.23857	6.787660000000001	7.127007471867754	WT
81.93596	4.91655	6.000478910602866	pom1D		101.71681	7.55593	7.428398511514469	WT
124.70566000000001	6.912489999999999	5.543044317314867	pom1D		145.66978999999998	11.75721	8.071138154314633	WT
135.05243000000002	9.37965	6.945191582261792	pom1D		156.09176000000002	14.60237	9.354990936100661	WT
59.7724	6.7258	11.25235058321232	pom1D		86.92902	7.1778	8.257081467155619	WT
68.97556999999999	6.27064	9.0911028353952	pom1D		76.58779	6.11963	7.99034676415131	WT
60.78111	5.855230000000001	9.633305479284601	pom1D		84.65575	6.22227	7.3500854933067155	WT
78.71458	4.67791	5.942876148230734	pom1D		72.31558000000001	6.66878	9.221774892768611	WT
74.96821	6.8228100000000005	9.100937584077306	pom1D		79.91401	6.227930000000001	7.793289311849073	WT
79.66119	7.4147	9.307794673918378	pom1D		81.50769	7.257039999999999	8.903503460839094	WT
122.99507	11.33065	9.212279809263899	pom1D		152.10228999999998	11.8093	7.764051415662447	WT
174.92084	10.29085	5.88314691376968	pom1D		185.23393000000002	13.728270000000002	7.411314978848638	WT
104.54361999999999	6.52703	6.243355644275566	pom1D		68.68998	5.10586	7.433194768727549	WT
101.25214	6.070930000000001	5.995853519737953	pom1D		108.61984	9.09327	8.371647389648153	WT
89.11256	8.99235	10.091001762265611	pom1D		126.08066000000001	11.18389	8.870424694794586	WT
106.59011000000001	8.52078	7.993968671202234	pom1D		146.7848	10.17002	6.928523934358326	WT
88.87484	7.6706199999999995	8.630811599773343	pom1D		123.4667	8.38547	6.791685531402394	WT
106.55913000000001	8.68604	8.151380365061163	pom1D		78.72952	5.03972	6.401309191266503	WT
104.8822	6.408119999999999	6.109826071535494	pom1D		80.66427	6.10727	7.571220814370476	WT
75.99476999999999	7.339919999999999	9.658454127830113	pom1D		147.25625	11.39229	7.736371121769024	WT
117.78522	8.16495	6.932066688842624	pom1D		75.07901	6.01904	8.016941086463447	WT
32.42252	4.79217	14.780374875241037	pom1D		80.43738	5.07483	6.3090443771291405	WT
73.1766	5.8899099999999995	8.048898145035436	pom1D		64.44466	4.11914	6.391747586223591	WT
114.6937	6.620989999999999	5.772758224732482	pom1D		131.04488	9.52712	7.270119977216965	WT
95.25168000000001	5.3101199999999995	5.574830806133812	pom1D		118.86111000000001	8.40886	7.0745258899231205	WT
84.57291	7.74793	9.161243239708792	pom1D		112.04293999999999	8.476289999999999	7.565215621796428	WT
147.23282	10.45112	7.098362987274168	pom1D		83.74459	5.0258400000000005	6.00139065699647	WT
120.00226	8.10243	6.751897839257361	pom1D		87.95042	6.780010000000001	7.708900082569249	WT
32.36145	4.51797	13.960962812234929	pom1D		73.34039	5.417669999999999	7.387020985298823	WT
100.0151	7.35337	7.352259808768875	pom1D		77.14705	5.14401	6.667798703903779	WT
168.82721999999998	9.951419999999999	5.8944404818133	pom1D		73.35816	4.5862	6.251792574950081	WT
113.05513	6.95118	6.148487025754603	pom1D		110.0456	8.82024	8.015077386101762	WT
85.55378	6.00007	7.013214378137354	pom1D		90.43937	7.677230000000001	8.488814108280499	WT
108.59103999999999	7.680339999999999	7.072719811873982	pom1D		126.67428999999998	9.67405	7.636948271034321	WT
55.96691	6.86953	12.274270635988302	pom1D		85.22180999999999	7.54953	8.858683006145963	WT
101.77785	6.04056	5.935043823385933	pom1D		100.51115	7.3648	7.327346269543229	WT
126.49933	7.58755	5.9980950096731735	pom1D		75.32829	5.70688	7.5760116152908825	WT
113.66616	10.00628	8.803218125781676	pom1D		68.55672	6.1348199999999995	8.948531960105441	WT
93.83762	7.06283	7.5266508251168345	pom1D		136.31715	9.89591	7.259475421837972	WT
132.28898999999998	11.3738	8.597692067949117	pom1D		122.77808	9.32037	7.59123289759866	WT
57.131040000000006	4.71373	8.250733751739858	pom1D		88.70470999999999	6.978680000000001	7.867316177461153	WT
95.37550999999999	7.509710000000001	7.873834698236477	pom1D		124.71735	9.08654	7.285706439400773	WT
69.61426999999999	6.611089999999999	9.496745423028928	pom1D		121.38118	9.19111	7.572104670592261	WT
66.65132	5.54472	8.318995032656517	pom1D		110.40893999999999	7.7164399999999995	6.98896303143568	WT
41.869009999999996	4.90022	11.703692062458607	pom1D		121.62653	9.726989999999999	7.997424575049537	WT
40.44106	5.23803	12.952256938863622	pom1D		117.20741000000001	8.18416	6.982630193773584	WT
103.6893	5.59961	5.400374001946199	pom1D		130.15986	9.85567	7.571973417918549	WT
98.08795	7.64336	7.792353698899814	pom1D		134.17076	11.48584	8.560613355696873	WT
61.02636	5.311640000000001	8.703845354695906	pom1D		136.6816	10.97889	8.032456453538735	WT
83.46296	5.3349	6.391937213825151	pom1D		136.14531000000002	8.85994	6.507708565208745	WT
104.62451	6.986910000000001	6.678081455291881	pom1D		128.74195	9.05631	7.034467009393596	WT
59.76221999999999	5.665019999999999	9.479266332475602	pom1D		134.64893999999998	9.00663	6.688972078057207	WT
80.0364	5.45015	6.809589136942691	pom1D		117.5517	8.48733	7.220082738063338	WT
91.44369	5.391030000000001	5.895464192225839	pom1D		84.81369000000001	6.59369	7.77432275379128	WT
85.90938	7.30575	8.504019002348754	pom1D		90.49259	6.20641	6.85847316338277	WT
83.08145	5.58628	6.723859537839072	pom1D		102.75515	8.75567	8.520906251414164	WT
77.64313	5.78989	7.457053830776786	pom1D		88.40236999999999	6.5465800000000005	7.405434944787115	WT
117.07011000000001	9.158439999999999	7.823038690234423	pom1D		101.01536	8.47408	8.388902440183355	WT
98.99738	6.22353	6.2865603109900485	pom1D		108.89587	8.9708	8.237961641704135	WT
99.32816	7.116639999999999	7.164775829935841	pom1D		85.76366999999999	5.80417	6.767632495204555	WT
156.16584	9.9011	6.340118940224058	pom1D		108.05878999999999	8.01469	7.41697181691559	WT
116.04382	6.85902	5.910715452145578	pom1D		125.18472	9.49088	7.5815003620250145	WT
101.71351999999999	5.98102	5.880260559264885	pom1D		125.27956	8.44563	6.741426933491784	WT
105.70588000000001	7.53198	7.125412512530049	pom1D		85.65286	6.4884699999999995	7.57531038660005	WT
50.73829	6.1898599999999995	12.199583391556947	pom1D		96.03531	6.71813	6.995479058692059	WT
81.05685	5.258769999999999	6.487755198974546	pom1D		76.71875	6.47527	8.440270468431772	WT
74.44382	5.2188300000000005	7.010427460600491	pom1D		132.62267	9.1969	6.934636438853175	WT
42.68462	5.048769999999999	11.828077654199566	pom1D		117.3026	8.640039999999999	7.365599739477215	WT
95.05248	4.6437	4.885406461777746	pom1D		137.18965	10.30814	7.513788394386895	WT
83.7124	7.92507	9.467020417524763	pom1D		72.29252	5.22476	7.227248406889123	WT
115.19176000000002	9.12903	7.9250720711273095	pom1D		71.33949	4.55921	6.390864302506229	WT
157.18459	9.63049	6.126866507715547	pom1D		74.92718	5.49568	7.334694833036556	WT
146.40931	9.34167	6.380516375632124	pom1D		86.62066999999999	7.03561	8.12232230482632	WT
59.69185	5.70343	9.5547884677724	pom1D		114.28988000000001	8.682160000000001	7.59661310345238	WT
102.68415	6.94068	6.759251549533205	pom1D		134.48265	10.19182	7.578538941640427	WT
105.19734	6.4274	6.1098503061008955	pom1D		63.916669999999996	4.57924	7.164390760657588	WT
82.62550999999999	7.19302	8.70556805035152	pom1D		61.799780000000005	5.19139	8.40033734747923	WT
98.13401	8.55935	8.722103580603708	pom1D		124.09856	9.64156	7.769276291360673	WT
99288	7.459510000000001	7.513002578357909	pom1D		144.07306	10.567160000000001	7.334584272729407	WT
71.61258000000001	6.13518	8.567181911334572	pom1D		118.35231999999999	9.14533	7.727208051350409	WT
107.7903	7.89398	7.323460459800186	pom1D		83.06170999999999	7.36498	8.866877409578976	WT
134.91351	8.75871	6.49209260065949	pom1D		85.53714000000001	7.4909300000000005	8.75751749473971	WT
98.80633	7.22542	7.312709620932181	pom1D		119.81821000000001	8.152339999999999	6.803924044600565	WT
79.66164	6.512	8.174574362265199	pom1D		73.46254	5.4355400000000005	7.399063522715115	WT
118.49425	7.18653	6.064876565740533	pom1D		69.31642	5.09546	7.351014377257221	WT
88.75244	5.75957	6.489477923085832	pom1D		85.37034	7.20937	8.44481818861211	WT
101.53124	7.29241	7.182429762504625	pom1D		90.47064	6.39099	7.064159157048076	WT
42.96861	5.6307599999999995	13.1043568781955	pom1D		68.28518000000001	5.65552	8.282207061620104	WT
103.56225	7.188610000000001	6.941342043070714	pom1D		69.67694	5.7605	8.267441136192263	WT
103.03312	7.1409199999999995	6.930703447590444	pom1D		109.88071000000001	10.39359	9.458976011349034	WT
121.61097	8.08582	6.648923201582884	pom1D		86.19218000000001	6.73291	7.811509118344611	WT
90.54194	5.696280000000001	6.29131648824843	pom1D		85.67102	6.735810000000001	7.862413684347404	WT
83.90866	6.532830000000001	7.785644532995761	pom1D		95.3736	7.010110000000001	7.350157695630657	WT
75.4993	6.03188	7.989319106269859	pom1D		87.26778	7.306430000000001	8.372425653545902	WT
98.59707	5.84658	5.929770529692211	pom1D		66.98454	5.8408	8.719623960991596	WT
92.05946	7.937819999999999	8.622492463023354	pom1D		69.50461	5.05135	7.267647426551995	WT
112.72095	7.65154	6.788037183859788	pom1D		83.63188000000001	5.49224	6.567160752574257	WT
135.14226000000002	9.1076	6.739268678798179	pom1D
109.56648	8.32302	7.596319604316941	pom1D
86.50251	8.0581	9.315452233698188	pom1D
103.64114000000001	7.325989999999999	7.068611943095182	pom1D
137.87927	10.77135	7.812160595280204	pom1D
165.6081	11.099739999999999	6.702413710440491	pom1D
132.68858999999998	7.661810000000001	5.774279461406593	pom1D
88.30259000000001	7.133589999999999	8.078573912724416	pom1D
109.52978	9.996960000000001	9.127161581078681	pom1D
113.58346999999999	7.066839999999999	6.221715184436608	pom1D
102.02415	6.532109999999999	6.402513522533634	pom1D
135.86543999999998	8.80112	6.477820997009983	pom1D
66.28194	6.48407	9.782559170718297	pom1D
158.81265	10.55446	6.645855981875499	pom1D
90.53766	7.586460000000001	8.379341812015022	pom1D
40.00371	5.64386	14.10834145133039	pom1D
55.75042	6.77412	12.150796352744967	pom1D
86.8916	5.14118	5.916774463814685	pom1D
124.26388	6.56204	5.280730007786655	pom1D
44.15743	5.91234	13.389230306202151	pom1D
135.06383	6.4547099999999995	4.779007081318514	pom1D
110.87426	7.7070300000000005	6.951144476635064	pom1D
50.37787	5.17024	10.262919015829768	pom1D
110.60736999999999	6.93243	6.267602240248548	pom1D
89.61904	5.31714	5.933047263170862	pom1D
83.339	5.80552	6.966150301779478	pom1D
115.31541000000001	7.8253	6.785996771810463	pom1D
72.86968	6.35884	8.7263179967306	pom1D
47.06232	4.60275	9.780117087300415	pom1D
115.68978999999999	7.63559	6.600055199339544	pom1D
109.88282	9.589189999999999	8.726741814598496	pom1D
118.70708	5.391769999999999	4.542079545718755	pom1D
82.85871999999999	6.567310000000001	7.9259129274504865	pom1D
85.50009	6.15907	7.203583060555842	pom1D
95.38977	7.3192699999999995	7.673013573677764	pom1D
71.02381	6.84236	9.633896013182058	pom1D
33.96804	5.43631	16.004190998361988	pom1D
55.70032	5.35321	9.610734731865096	pom1D
57.10985	4.21925	7.387954967488095	pom1D
159.99607	7.84375	4.902464166776096	pom1D
