# Supplementary material for: Control of nuclear size by osmotic forces in Schizosaccharomyces pombe
Source: eLife. 2022 Jul 20;11:e76075. doi: 10.7554/eLife.76075 (PMC9410708; doi:10.7554/eLife.76075)
Supplement: Figure 7—source data 2. — Related to Figure 7C–F, Figure 7—figure supplement 1. [file elife-76075-fig7-data2.xlsx]

## Sheet: Sheet1
Cells volume
	Time (4min interval)	Vol 1	Vol 2	Vol 3	Vol 4	Vol 5	Vol 6	Vol 7	Vol 8	Vol 9	Vol 10	Vol 11	Vol 12	Vol 13	Vol 14	Vol 15	Vol 16	Vol 17	Vol 18	Vol 19	Vol 20	Vol 21	Vol 22	Vol 23	Vol 24	Vol 25	Vol 26	Vol 27	Vol 28	Vol 29	Vol 30	Vol 31	Vol 32	Vol 33	Vol 34	Vol 35	Vol 36	Vol 37	Vol 38	Vol 39	Vol 40	Vol 41	Vol 42	Vol 43	Vol 44	Vol 45	Vol 46	Vol 47	Vol 48
	0	116.28358999999999	149.02036	57.98223	94.07994000000001	70.90939	150.60248	76.06231	141.44931	113.77772	118.82016000000002	54.36983000000001	122.26064	86.12368000000001	136.7779	118.78031999999999	117.27165	133.45574	63.1134	111.82948999999999	136.67311999999998	87.95411	140.15448	103.77821	106.04943	142.59126	106.09548000000001	132.62595	74.52019	77.34644	116.1112	104.34891	200.44188	112.20308999999999	151.01601000000002	62.970459999999996	143.53431	127.10155	120.53523999999999	80.94577	88.05506	134.1124	154.38475	99.13606999999999	116.57943999999999	73.73966	89.75776	161.37206	146.45041
	1	115.04512	152.15511	57.66551	92.40801	73.48909	154.25333999999998	78.8055	138.42345	113.98088	124.38987	58.81626	126.74045	89.20596	134.39457	118.45987	116.54348	139.56975	63.562259999999995	115.17092	137.26259	90.21509	140.26855	106.37108	109.83013999999999	145.05528	112.41214	127.92205	80.35305	80.6514	118.58193	107.04887	207.54523	115.18607	152.85836	70.85991999999999	144.79363999999998	132.03959	123.8609	77.12446	98.11216999999999	135.17615	169.32577	104.55328	119.6204	79.40239	88.99022	175.14405	152.04877
	2	115.46021	156.35859	58.59608000000001	96.09698	73.33693000000001	153.25923999999998	83.80313000000001	149.57568	116.39233999999999	127.12503999999998	57.494040000000005	129.67371	90.95691	144.2157	122.82188000000001	122.99774	148.42369	64.25140999999999	122.66813	141.93072	86.60591	145.50463	109.67411000000001	108.1305	151.91673	111.57458999999999	139.47858	84.16445	80.56025	114.65156	110.20371999999999	214.6739	118.53188	160.61691000000002	65.1808	149.12003	138.07781	131.89391	88.13343	97.4729	139.52215	166.37556	108.58323999999999	123.01078000000001	78.0136	97.37555	167.30198000000001	156.41767
	3	119.50046999999999	162.57371	61.80828	100.07307	77.04225	156.60359	84.45818	155.85164	120.95693	129.20921	58.52788	134.32171	90.83143000000001	149.6392	129.39749	129.49086	148.62335	69.42746	129.9741	147.57118	93.44404	152.00271	116.85999	114.6496	153.74874	115.95433	146.57806000000002	86.24927	85.68531	117136	116.5903	212.44147999999998	123.37028000000001	161.38126	67.52323	156.24473999999998	138.2631	127.99968999999999	90.57177	100.26196999999999	140.81509	174.57886000000002	108.10542	127.17703	80.81514	101.1284	178.76066	156.20241000000001
	4	119.4405	165.71223999999998	62.93753	104.03151	79.30197	166.94317	88.93769	157.55119	121.86611	131.90341999999998	60.813719999999996	137.25059	93.94939000000001	150.76077	132.2273	129.16848000000002	150.72485	68.41129000000001	133.73622	149.25417	91.7383	150.08328999999998	119.70164	114.57552	156.32721	124.23102	145.88812	89.36140999999999	89.01524	118.87083999999999	115.0169	228.74546	122.78768000000001	175.0128	72093	162.08793	140.56448999999998	133.65622	91.83343	96.14361	146.95715	177.28611999999998	108.9482	128.11533	82.33414	100.02752	178.86467	161.79026000000002
	5	122.7592	167.1457	63.430640000000004	100.49294	78.14734	166.06587	78.15865	164.41031999999998	123.96636000000001		61.096709999999995	139.54098	97.94246	153.74233999999998	133.70967	133.64449	149.9125	67.93908	132.4257	150.45703999999998	99.81653	158.40658	122.16013999999998	114.29557		126.23255	152.22256000000002	92.48689	92.03908	121.22183000000001	120.3904		128.17693		71142	165.26113		135.81715	94.13176999999999	101.83712	152.39831	181.33704	119.5187	131.71334	82.16542	103.91174000000001		164.80916000000002
	6	122.33905	167.03493	65.26080999999999	103.8246	77.87654		89.53843	167.89427	131.44302		62.329209999999996		95.53825		139.1798	141.97249	152.7116	69.22507	126.48753	154.86065	95.41391	160.5559	123.25278	116.06081999999999		123.33158	154.90192	93.91781	92.91592	122.19708999999999	119.95532		133.25886		74.98966999999999	162.12995		138.51654	94.03695	102.39179	155.4539		119.04768	135.15622	84.09598000000001			165.52463
	7	123.6012		66.11816	104.21739000000001	79.39989		86.51881999999999	167.7163	136.30809		62.759190000000004		100.98250999999999		140.10265	143.5924	157.27993999999998	74.97282	133.81718	156.17199	99.78958	169.32956000000001	126.68033	128.31054		122.27316	152.87391000000002	94.16677	91.90534	122.30396999999999	120.2596		132.45965		79.3818	169.02372		140.21287	95.08513	100.41325	154.01391999999998		119.78469	137.48412	85.89607			166.64383999999998
	8	126.42353		67.6759	107.76238000000001	81.90982		89.35264000000001	172.81415	132.89722		68.30077		103.03193		138.87158	138.73041	163.11978	75.16257	126.83141		97.15733	166.91426		122.51818999999999		124.0158		97.64435	93.45903	121.23573999999999	121.42199				77.49025999999999	170.30653		141.74455	97.42184	105.69516999999999	159.75256000000002		122.47096	136.44971999999999	85.99457			169.59849
	9	126.69325		67.8659	108.02877	83.1906		86.6259	171.18173000000002	136.79922		65.56114000000001		104.78548		133.57076	138.37955	160.11796999999999	69.78274	130.12252		101.68431	166.85262		123.68767		126.34846999999999		96.72195	95.19169000000001	129.38173999999998	123.25496000000001				76.71466	173.53948			99.38309	111.55733000000001	162.89868		125.10686000000001	139.52215	87.16396			169.23998999999998
Nuclei volume
	Time (4min interval)	Vol 1	Vol 2	Vol 3	Vol 4	Vol 5	Vol 6	Vol 7	Vol 8	Vol 9	Vol 10	Vol 11	Vol 12	Vol 13	Vol 14	Vol 15	Vol 16	Vol 17	Vol 18	Vol 19	Vol 20	Vol 21	Vol 22	Vol 23	Vol 24	Vol 25	Vol 26	Vol 27	Vol 28	Vol 29	Vol 30	Vol 31	Vol 32	Vol 33	Vol 34	Vol 35	Vol 36	Vol 37	Vol 38	Vol 39	Vol 40	Vol 41	Vol 42	Vol 43	Vol 44	Vol 45	Vol 46	Vol 47	Vol 48
	0	6.06663	9.13115	7.6737	9.159130000000001	7.6253	10.004560000000001	6.85508	10.1658	8.269639999999999	11.40064	7.06462	11.9548	8.76574	11.73323	10.93785	10.89515	11.489469999999999	8.139330000000001	10.07426	11.78434	7.913189999999999	10.370460000000001	9.65855	8.20288	9.59867	8.036810000000001	9.86987	8.19748	9.283339999999999	10.24315	9.71138	11.752089999999999	10.77112	10.62707	8.27235	9.54386	9.70595	8.71418	8.64326	9.688039999999999	10.780489999999999	10.18984	10.023769999999999	7.91759	7.70598	8.71275	11.71585	10.015369999999999
	1	6.34427	9.18998	8.01331	9.73453	7.45125	10.353580000000001	7.43158	10.33281	9.04398	11.35927	6.863639999999999	12.06201	8.858189999999999	10.881210000000001	11.65822	9.94457	12.04338	8.56635	9.39673	11.71769	8.34489	10.47982	9.5941	8.44554	9.2289	8.566130000000001	10.896139999999999	7.85394	9.72597	10.21848	10.50601	12.53232	10.99685	10.880460000000001	8.73732	8.73404	10.24301	9.51902	8.930860000000001	10.2842	10.058760000000001	11.003630000000001	9.67817	9.18185	7.88191	9.10153	11.85802	10.20825
	2	6.04092	9.38926	7.8029	9.99424	7.7023399999999995	11.01277	7.7957	10.88302	9.39081	11.3107	7.3785	12.07083	8.81476	12.53664	12.16113	11.27818	11.99341	8.87304	10.06248	12.90113	8.18958	10.50741	9.57205	8.40346	10.2756	9.06371	11.684330000000001	7.87777	9.71118	10.3932	9.82531	12.83608	11.66537	10.54048	8.64312	9.83895	10.28167	9.93144	9.24193	10.30841	10.90495	11.99386	10.2769	8.9443	7.94325	9.88245	12.87311	10.9341
	3	6.93235	9.8007	8.32046	9.27121	8.11379	10.41649	7.85774	11.599210000000001	10.35009	11.44487	6.80903	12.66958	9.28999	12.31873	12.21245	10.85257	12.28055	8.76965	9.82757	12.99949	8.4201	10.67186	9.41424	8.97442	11.13786	8.9294	11.94917	7.66126	9.58503	10.51957	10.4571	13.285720000000001	11.44008	11.36823	9.4128	10.29739	10.93511	10.62327	9.10816	10.58431	11.53471	12.25008	10.91642	8.86284	8.17263	9.84342	12.17035	11.04111
	4	6.4643	10.08315	8.71909	9.16962	7.295089999999999	11.43719	7.50523	11.4382	9.6116	12.68126	7.39417	12.74746	9.37626	12.39917	12.301210000000001	12.25971	13.339260000000001	8.54412	9.5602	13.5669	9.11868	11.432780000000001	10.285639999999999	8.94626	10.87998	8.750689999999999	11.44357	8.07049	10.146980000000001	11.21643	10.52513	14.1448	11.53787	12.573960000000001	8.908560000000001	9.56979	11.20908	10.1971	9.47677	9.43832	10.88589	13.0419	11.64695	9.86459	7.94108	10.38625	12.64443	11.29758
	5	7.099189999999999	10.18723	8.983130000000001	9.83975	8.244639999999999	11.39166	8.376560000000001	12.40275	9.84137		7.2582699999999996	13.29416	9.32771	12.56546	12.27411	11.64684	12.39605	8.57118	10.44402	13.887960000000001	8.965019999999999	11.95582	10.23062	9.54142		9.16353	12.18008	8.44445	10.35004	10.819989999999999	10.58617		12.69215		9.13231	11.40087		10.471910000000001	9.66169	10.41353	11.89167	12.28467	11.08912	9.025910000000001	7.55512	10.64686		11.65734
	6	7.07107	10.59672	8.84276	9.92176	8.28008		8.15221	11.041039999999999	10.63845		7.50103		9.986080000000001		12.5647	12.43041	13.05611	8.89028	10.8269	13.87478	8.60138	12.31643	10.83065	9.17268		9.56751	11.07387	8.60019	9.92341	10.94517	10.4791		12.770539999999999		9.24112	10.96247		10.65802	9.689680000000001	10.27924	11462		11.486839999999999	9.15857	8.147269999999999			10.94088
	7	7.5357199999999995		8.46514	9.64759	8.44887		8.23928	12.070260000000001	10.394860000000001		7.51041		9.46893		12.59112	12.083739999999999	13.26537	8.4507	10.77985	13.834060000000001	10.0849	12.04439	10.97705	9.94713		9.61721	11.64302	8.9138	9.42181	11.46702	10.564689999999999		13.01984		9.75508	10.58821		11.1746	9.95118	9.9889	12.46603		11.22125	9.59346	8.00344			11.70853
	8	7.20147		8.556239999999999	8.94351	8.614939999999999		8.32785	13.30285	9.979610000000001		7.6578		9.60698		12.84269	11.86393	13.563720000000002	9.119019999999999	10.63772		9.92421	12.71734		9.42815		9.549389999999999		9.00808	10.26703	11.42643	11.107669999999999				9.1935	11.996269999999999		10.87218	10.209660000000001	10.237739999999999	12.71618		12.24686	10.28908	7.91977			11.76121
	9	7.4225699999999994		9.11186	9.78428	8.263069999999999		8.21841	13.51	11.11246		8.07577		9.26797		12.880560000000001	12.55432	13.94261	8.17424	10.99887		9.64932	12.715110000000001		9.49413		9.651580000000001		8.72011	11.15899	11.55312	11.236189999999999				9.70297	11.32687			10.10453	11.12693	13.023489999999999		12.10184	10.67094	8.215019999999999			11.68063
N/C ratio
	Time (4min interval)	N/C 1	N/C 2	N/C 3	N/C 4	N/C 5	N/C 6	N/C 7	N/C 8	N/C 9	N/C 10	N/C 11	N/C 12	N/C 13	N/C 14	N/C 15	N/C 16	N/C 17	N/C 18	N/C 19	N/C 20	N/C 21	N/C 22	N/C 23	N/C 24	N/C 25	N/C 26	N/C 27	N/C 28	N/C 29	N/C 30	N/C 31	N/C 32	N/C 33	N/C 34	N/C 35	N/C 36	N/C 37	N/C 38	N/C 39	N/C 40	N/C 41	N/C 42	N/C 43	N/C 44	N/C 45	N/C 46	N/C 47	N/C 48
	0	5.217098990493843	6.127451309337864	13.234572040433768	9.735476021774673	10.753582847067221	6.643024736378845	9.012453079586987	7.186885535178646	7.268241972154126	9.594870096118367	12.993640038970138	9.778126468174877	10.178083426068183	8.578308337823582	9.208469887941034	9.29052332767553	8.60919882501869	12.896357984199872	9.008589773591922	8.62228066499104	8.996953070186258	7.399306822015252	9.306915199250401	7.734959065786587	6.731597715035269	7.575072943729554	7.441884487915074	11.000347691008304	12.002284785182097	8.821844921075659	9.30664249391776	5.863091086553369	9.599664322970073	7.037048588424498	13.136874019976986	6.6491837387172446	7.63637422202955	7.229570372946535	10.677840237976612	11.00225245431665	8.03839913386085	6.600289212503179	10.111123025151189	6.791583490193469	10.450251601377062	9.706960155868416	7.260147760399166	6.838744937620864
	1	5.514592883209649	6.039876018623364	13.896192021886222	10.53429242768024	10.139260126911354	6.712062118071481	9.430280881410562	7.464638397612543	7.934646582830383	9.131989606549151	11.669630132891822	9.517095765400866	9.930042790862851	8.0964655045215	9.841493157134142	8.532926938512562	8.628932845405254	13.477101034481784	8.158943247132175	8.536695978124849	9.24999354320879	7.471254247655658	9.019462808876245	7.689637835297305	6.362333036067352	7.620289054189344	8.517796580026664	9.774289837162373	12.059269894880934	8.61723198467085	9.814218496654846	6.038356073035261	9.547031164445492	7.118001266008611	12.330411888695334	6.032060524205346	7.757529389480837	7.685250147544544	11.579802309150692	10.482083924960586	7.441223914129822	6.498496950582301	9.256687116846072	7.675822852958191	9.92653999457699	10.227562084912254	6.770438390570504	6.7137997893702135
	2	5.232036214034254	6.004953101713184	13.316419801461121	10.40016033802519	10.502675800582324	7.185713566111904	9.30239717776651	7.275928814095982	8.068237136567578	8.897303001831899	12.833504133645851	9.308617760685648	9.69113836430899	8.69297864240856	9.901436128481341	9.169420511303706	8.080522725179518	13.809875923345496	8.203010839082655	9.089737584646931	9.456144505611684	7.221357835829692	8.727720699078388	7.771590809253634	6.763968655723435	8.123453556943387	8.377150097169043	9.359973242859663	12.054555441424277	9.065031474495418	8.915588330412078	5.9793388949471735	9.84154642615978	6.562497062108839	13.260223869605772	6.598006988061898	7.446286988474108	7.529870029632149	10.486293339542101	10.575667698406429	7.815927435177854	7.208907365961682	9.464536147567525	7.271151357628981	10.181878544253822	10.148800186494453	7.694535354572611	6.990322768520975
	3	5.801106891044027	6.028465488054619	13.461723898480916	9.264440473346127	10.531610901810371	6.651501411940812	9.303705099967818	7.442469004496842	8.556839198878476	8.857627099492365	11.633823060052746	9.432265268213158	10.227726239694782	8.23228806355554	9.437934228863327	8.380954455009412	8.262867173966946	12.631385333699377	7.561175649610191	8.808962563015353	9.010847561813467	7.0208353522118125	8.05599932021216	7.82769412191582	7.244195952435123	7.7007904750085645	8.1520863354311	8.882695470929784	11.18631653430442	8.980646428083595	8.96909948769323	6.253825759451498	9.272962661671839	7.044330921694378	13.94009143223747	6.590551464324496	7.9089142366980045	8.299449787729955	10.05629016635095	10.556654731599629	8.191387726982954	7.016932061533682	10.097939585267788	6.968899965662039	10.112746200773765	9.733586213170584	6.808181397405893	7.06846328427327
	4	5.412150819864284	6.084734597758139	13.853562413396267	8.814271752856419	9.199128344478705	6.850948140016748	8.438750770342697	7.2599895944930655	7.887016332924715	9.614049431015513	12.158720104607974	9.287726923432533	9.980118018861004	8.224400817268311	9.303078864954514	9.491255142121359	8.850073494848395	12.489342036964949	7.148549585146044	9.089796285088719	9.939883342071958	7.617623520912957	8.592731060326324	7.808177523436072	6.959748082243647	7.043884852591566	7.844072567389312	9.031292142771695	11.399149179398945	9.4358128536822	9.150942165890404	6.183641852389114	9.396602330136052	7.184594498230987	12.357038824851236	5.904073178058353	7.974332635504175	7.629349386059251	10.319520897781995	9.816897867679401	7.407526615751597	7.356413463163388	10.690355600184308	7.699773321428435	9.644941940244959	10.383392490386646	7.0692719808780575	6.982855457429885
	5	5.783020743048177	6.094820267586901	14.162130478267285	9.791483859463163	10.55012237140765	6.859723795142253	10.717380609823739	7.543778273772596	7.938742413667707		11.879968659523566	9.527065095859296	9.523663179381037	8.173064101925338	9.179672644469171	8.714792506597167	8.268856833152674	12.615978903452914	7.886701750491029	9.230515235445283	8.981498355031976	7.547552633230261	8.374761194608979	8.34802258740212		7.2592449411819695	8.001494653617701	9.130429188396324	11.245266684543132	8.92577681759135	8.7932011190261		9.902054917370856		12.836734980742742	6.898700256981178		7.710300208773341	10.264005446832671	10.225672132126281	7.803019600414203	6.774495712514112	9.278146432315612	6.852692369656713	9.195011721476018	10.246060743473258		7.0732354924932554
	6	5.779896116571119	6.3440143926782255	13.549877790361474	9.556270864515731	10.632316227711195		9.104705097018117	6.576186310587014	8.093583059792754		12.034534049123998		10.452441823039464		9.027674993066523	8.755506084312533	8.549520796062643	12.842572784686244	8.559658015300005	8.959525870516494	9.014807170149512	7.671116414905961	8.787347433461541	7.903338956247251		7.757550823560357	7.148955932889664	9.15714495472158	10.679988962063767	8.956980890461468	8.735835976261829		9.58325772860431		12.323190647458512	6.761532955508836		7.694402415769265	10.304119816731614	10.039125207206553	7.373246988335448		9.648940659742381	6.776284509880492	9.688061189131748			6.609819940391952
	7	6.096801649174926		12.803048360692431	9.257178672388552	10.640908948362522		9.523107226843825	7.1968317927357095	7.626003709684438		11.967028255144783		9.376801982838415		8.987067696435433	8.415306102551389	8.434241518657752	11.271684858592753	8.055654737306526	8.858220990844774	10.106165393220413	7.112987242156656	8.66515740841534	7.752387294138112		7.865348372447395	7.616093550560719	9.465971913446749	10.251645878248207	9.375836287243988	8.784903658418951		9.829287635895156		12.288811793131423	6.26433378699747		7.969739154472766	10.465548083070402	9.947790754706176	8.094093053407121		9.367849931406091	6.977867698465831	9.317585775460973			7.026080291956786
	8	5.696305110290782		12.64296448218642	8.299287747727917	10.517591175270558		9.32020587192499	7.697778220128386	7.509269193140383		11.211879456117407		9.324274523441423		9.24788930895724	8.551787600137562	8.315190224018204	12.132395153598392	8.387291444603509		10.214576707696683	7.619085391505793		7.69530630512906		7.700139820893788		9.225398090109667	10.985594436407055	9.424968247812073	9.14798876216738				11.864071691074466	7.043928380197752		7.670263160029786	10.479847229327634	9.686100131160204	7.959922520177454		9.999807301257375	7.540565125380984	9.209616374615281			6.93473744960819
	9	5.858694129324174		13.426271514855031	9.057105806166266	9.932696722947062		9.48724342257916	7.892197374100611	8.123189591285682		12.317921866520319		8.844708255380421		9.643248267809511	9.072380998492914	8.707710945873222	11.713842133455922	8.452702883405577		9.489487611215536	7.62056358479717		7.6758904100950405		7.638857835001882		9.015647430598742	11.722651420517902	8.92948263023824	9.11621731084899				12.648130096646456	6.526970116540628			10.167252799243816	9.97418098837611	7.994840719396866		9.673202572584747	7.6482049624378625	9.424789786971587			6.9018143997763195
N/C ratio change
		N/C 1	N/C 2	N/C 3	N/C 4	N/C 5	N/C 6	N/C 7	N/C 8	N/C 9	N/C 10	N/C 11	N/C 12	N/C 13	N/C 14	N/C 15	N/C 16	N/C 17	N/C 18	N/C 19	N/C 20	N/C 21	N/C 22	N/C 23	N/C 24	N/C 25	N/C 26	N/C 27	N/C 28	N/C 29	N/C 30	N/C 31	N/C 32	N/C 33	N/C 34	N/C 35	N/C 36	N/C 37	N/C 38	N/C 39	N/C 40	N/C 41	N/C 42	N/C 43	N/C 44	N/C 45	N/C 46	N/C 47	N/C 48
	slope	0.0176930403250143	0.007494278964224229	-0.01369867419914849	-0.038806923860923576	-0.0036293667197493896	0.006899580039155375	0.009526921358407693	0.007983698179783755	0.0017692081415517137	-0.005900095931562355	-0.019234418424008	-0.012998327713967089	-0.02665870364384643	-0.015022184429312942	-0.00934582970685957	-0.007961569882795387	0.0011178013787332835	-0.04846415140484008	-0.0006177664785514938	0.013300292908936872	0.020437108025288704	0.006613709400034524	-0.018378060078014923	0.0002709445136077263	0.03345409126961316	0.0003456584850725396	-0.0210110711186348	-0.030684948065332653	-0.03139369927083793	0.011508916120056683	-0.012255135954780809	0.02141428045219318	0.0062311343850211766	0.005535536882468617	-0.025592641324451444	0.00882175445380454	0.020682541854160432	0.009817305676813713	-0.017743523165943034	-0.02895110420803203	0.003895096018218161	0.023234333809785186	-0.0030031512234408083	0.005865823548828747	-0.030747076919758278	0.01962700129373942	-0.008600213805170688	0.0015264036388839529
	intercept	5.320695628855265	6.013542248965352	13.681252415786766	10.169521425891052	10.405317947610383	6.748166494218786	9.192538339275103	7.209961764484033	7.868731172544694	9.26636861445396	12.416284507292005	9.605132824100734	10.23275652597689	8.483139422210268	9.546021452534696	8.980793624561729	8.450591113401131	13.460408339934892	8.15334758918089	8.713262795859064	9.07816778156543	7.3111215353215	8.94855473162088	7.815823489625161	6.54473595814406	7.622241414823475	8.181596771285797	9.956648061376477	11.923758908572157	8.846200763374464	9.294056227315213	5.892336489657738	9.5343150170164	6.945010172233714	13.159225468282164	6.368142558790837	7.579227159604051	7.556055849499602	10.799435449587824	10.751762464798377	7.74184704243549	6.676912456278537	9.812915559254243	7.114699741490382	10.26858969744387	9.878123632780207	7.189316687206613	6.886512115644259
	rvalue	0.7479905589931799	0.5671004804511003	-0.3509167105830987	-0.6849017513652815	-0.0933874485677632	0.2533912954604231	0.2021152470991309	0.2720886758685924	0.059254613050803186	-0.10165476740554064	-0.4300721827713472	-0.5421538469215056	-0.6552468446080196	-0.4642065227292967	-0.352300281674256	-0.24615943202846616	0.056744627540444494	-0.7751306969050765	-0.014243525008606579	0.5424741894173571	0.5119526703577068	0.34211355998214554	-0.47371476681692587	0.016558890920745393	0.6532727699726635	0.013960309292880954	-0.4389640293614493	-0.6028024491279755	-0.6193627787076623	0.5076304682879352	-0.46217689168683834	0.862907131832986	0.27309343385588625	0.14228425628599464	-0.5096983053094217	0.29425821509146577	0.6155292575388659	0.36697909587941785	-0.5049885039491712	-0.8492234299961667	0.15592164939665132	0.5088881351424035	-0.0790111911469652	0.1824965128308272	-0.8480599809866928	0.5160000897072393	-0.14387135822508895	0.1206754985342708
	p-value	0.01284978574199076	0.18428522649331253	0.3201181684965253	0.02886535722085472	0.7974872668132285	0.6280478230920667	0.5754956633268361	0.44694679572297413	0.8708346840879159	0.8707923934941252	0.21476563779900673	0.26644708489293156	0.03972690521259912	0.3537056128722891	0.31808106017379945	0.4929856217632481	0.8762700447649903	0.008441731180440979	0.9688486094884781	0.16479205070872316	0.13034569018256004	0.3332378160688121	0.2357194358810294	0.9637873565932933	0.23191400271841983	0.9694677743183375	0.2765602039852918	0.06509360530569006	0.05618092560614724	0.13417876726914116	0.178677089455064	0.0596647099655938	0.5128393318973439	0.8194511929349333	0.13233639552623308	0.40920997646841784	0.2690557218793153	0.33129632008164367	0.13655551112405245	0.0018771156401759426	0.6670932882882887	0.3025604482511839	0.8282379651036296	0.6138210141960259	0.0019328697921250906	0.2946939492667835	0.8174512229168642	0.7398330692131028
	stderr	0.0055505919867866295	0.004867733703243169	0.0129239120745799	0.014596416049788343	0.013680288447418903	0.013170153331365123	0.01632118342783079	0.009982666920904576	0.010537752644558187	0.03333612281677679	0.014275180871979992	0.010072994071863814	0.010866122687265056	0.0143315028715576	0.008777751925841982	0.011083164875679882	0.00695335761133475	0.013966286188048946	0.015332670542593895	0.00840859147352925	0.012123965810821712	0.006422438089748548	0.013948401138462007	0.005784216943525872	0.022385164252688935	0.008753159947734155	0.017557551709530727	0.014359809238531205	0.014069546570787706	0.006906130627100984	0.008313513373937409	0.007240721346118715	0.008960859526518691	0.022233153154771923	0.01527332903854029	0.010130123883474233	0.01528916070895264	0.009405717483364055	0.010722291418067973	0.006364434109831714	0.008724134124267455	0.019651542215625668	0.013396265617653318	0.011173112515008092	0.0067924490668676025	0.016290950811305858	0.03415327722284397	0.00443935446690531
[truncated: 43 more columns]
