# Supplementary material for: Control of nuclear size by osmotic forces in Schizosaccharomyces pombe
Source: eLife. 2022 Jul 20;11:e76075. doi: 10.7554/eLife.76075 (PMC9410708; doi:10.7554/eLife.76075)
Supplement: Figure 7—source data 3. — Related to Figure 7G–I. [file elife-76075-fig7-data3.xlsx]

## Sheet: Sheet1
Cells volume
	Time (4min interval)	Vol 1	Vol 2	Vol 3	Vol 4	Vol 5	Vol 6	Vol 7	Vol 8	Vol 9	Vol 10	Vol 11	Vol 12	Vol 13	Vol 14	Vol 15	Vol 16	Vol 17	Vol 18	Vol 19	Vol 20	Vol 21	Vol 22	Vol 23	Vol 24	Vol 25	Vol 26	Vol 27	Vol 28	Vol 29	Vol 30	Vol 31	Vol 32	Vol 33	Vol 34	Vol 35	Vol 36	Vol 37	Vol 38	Vol 39	Vol 40	Vol 41	Vol 42	Vol 43	Vol 44	Vol 45	Vol 46	Vol 47	Vol 48
	0	48.6751	153.2394	76.8194	124.0716	170.0115	112.7605	59284	103.1572	72.6176	107.6764	199.0665	171663	98.4638	76.0003	129.3113	89.0286	82.5808	157.5612	92.4868	110.5289	136.9793	131.8017	83.9498	135.3708	61.02	75.0535	106.2208	143.1904	100.1192	74.8886	143.0957	102.9822	51.3183	117.4235	123.9372	100.1711	89.7234	106935	65.5843	98.5563	138776	102.7763	140.3955	88.8581	134.6155	129.8268	96.7914	135.5462
	1	51.2382	154.4301	77.6633	130.8206	174.2487	116.6317	60.6466	107.3464	73.7962	107.5001	202.9326	180.9971	105.8783	78.4417	132.5931	91.7604	84.6835	158.3116	96.0377	114.3745	140.7657	133.6221	85.2592	136.4494	65.3461	79.31	108.8699	143793	102586	75.2396	141.3041	103.8191	49.3959	117.7112	124.9268	101.2157	85.4146	107.7718	66.7605	96.9047	139.7116	101.1949	143.5261	92419	138.0824	129.0464	102.8736	140.0176
	2	50.8059	157.6764	81.0451	131.2851	179.5042	118.2013	62.8696	111.7378	77.78	111211	203.4409	185.6067	106.8323	78.2176	134.3463	93.2608	87.6661	158434	99.1903	116.8625	143.3738	135.0941	87.2789	137.9153	67.9445	80.0338	110.2477	148.9145	105.0015	75.3058	141.2928	107.5498	50.45	122.6241	124.4971	103.3099	88478	108.8223	64505	100.1395	140.9962	100.6846	146.0904	92.3254	136.9434	128.1662	98.5021	139.9033
	3	51.8219	161.4939	78.6525	136.4277	182.9869	119.7372	63.7143	113.8146	76.9195	111.6395	209.9319	185.0557	103.3363	81.5269	135.6981	93.9384	84.4891	162.6667	98.9366	119.1585	145.7699	135.8283	88.2667	140.0384	65.4736	78.1575	110.7151	147.8963	104.5812	76.4694	142.5481	105.0794	52.9411	122.5527	127.9263	105.7706	91.0316	107.9486	67.5233	98942	141.3657	101.9366	149.3863	95.1607	141.7387	131.8396	98.8112	143.2809
	4	52.2461	160.8826	80.9467	136.2002	184.3668	121.6276	64.9598	111.1432	84.2846	113.8264	206.0091	186.4603	110.1656	80.2891	138.2617	96.9577	87.2997	163.5768	101.1905	120.7839	146.7959	138.1905	90.2549	141.0833	66.87	78.0426	111.3279	145.7787	106.3396	76.3646	149.1177	109.2426	50.4804	123.1206	130.0634	104.3318	90.6169	109.8057	66.3621	100.2327	143.5444	104.9077	146.9569	95984	143.5105	134.6526	101.1918	143.5007
	5	52.3075	161.8601	79.5947	136.0761	185.2887	124.6207	63.9467	110.7675	82.5645	115.1361	214.5868	181.8991	109.3678	85.5486	138.0532	97.8887	86.1802	168582	102.0591	121.2823	147.5378	136.7465	88.1873	144.8398	67.9364	81.8908	112653	148.6122	104.6605	75.4684	147.9159	107.4851	51.3272	123.9106	128412	107.6294	87.5178	109.5068	67.1506	102821	145.5251	102.9003	149.7186	94.2969	142485	133.9948	105.7127	142.2845
	6	53.8219	162.7607	84.3676	136.9565	186.2653	121.6909	66.6139	115.6489	83.6148	116.1579	215.3086	187.6079	112.0587	84315	139.2483	99.7358	88.1369	167.5983	102.7607	124.3534	149.8044	141.7987	90.1141	143.9877	69.1084	81.6966	114.8086	154.3611	106576	76.6981	150.7884	108.3245	51.2226	123.7651	131.2047	102.6509	91.21	109.6992	68.5835	104.2714	146.2375	107.8075	150.1404	94.5739	144.4993	137.2134	100257	146.2347
	7	55.2699	164.7401	82.6172	137.2327	187.4437	125.19	65.3001	114.4756	84.6696	115.3777	214.0406	185.0385	111.1588	86.5388	142.4218	99.4706	92.6531	168.6888	101.4178	124.0744	149.4096	140.3456	90.4261	146.4336	70.0755	84.3605	115.4374	155.5311	109.2092	77.5186	152.8619	109.7355	52.4603	126.3523	132.1444	104.9712	89.5456	112.3252	68.9188	103.2287	148.0801	106.1768	153204	98.0855	145.6535	136.1965	100376	142.7348
	8	55.9242	168.8868	82.0632	140548	187.9228	122.6927	66.2117	116.1954	87.0502	116.5065	219.3483	187.1326	115.1844	84.3382	141.7783	100.8462	91.8221	170.5254	102.2795	125.0907	150.0539	144.0819	91275	146.9477	69.7609	84.1676	114.9641	150.3301	106.3423	76.7935	151591	108.2436	53176	124.4448	132.1645	106.8205	90.6527	111.9909	71.9909	103.8492	148019	106.1975	150.8263	96.9551	145.1184	137344	101.9603	146458
	9	54.9039	166.2629	83.1273	138942	189.0399	126.4816	64.6943	118.0103	87.3624	117.0673	216.0444	188.4365	112.9533	84.8535	142.5068	98.3251	90656	170.1224	104.0783	122.9756	151.8609	145.4295	93.3529	146.3444	72.4566	85.0482	113.9896	156.1782	109.0493	77.1261	148.8997	112.9491	51.6272	129.0663	132.2966	107.5188	88.9036	113252	70.8588	104.0925	146.9598	109.6794	153.6023	96.6063	145.7321	137565	104.6652	146593
Nuclei volume
	Time (4min interval)	Vol 1	Vol 2	Vol 3	Vol 4	Vol 5	Vol 6	Vol 7	Vol 8	Vol 9	Vol 10	Vol 11	Vol 12	Vol 13	Vol 14	Vol 15	Vol 16	Vol 17	Vol 18	Vol 19	Vol 20	Vol 21	Vol 22	Vol 23	Vol 24	Vol 25	Vol 26	Vol 27	Vol 28	Vol 29	Vol 30	Vol 31	Vol 32	Vol 33	Vol 34	Vol 35	Vol 36	Vol 37	Vol 38	Vol 39	Vol 40	Vol 41	Vol 42	Vol 43	Vol 44	Vol 45	Vol 46	Vol 47	Vol 48
	0	5.8513	10987	9.3468	11013	12.5351	8.9581	7.3737	5.8653	8.4287	10358	13.5923	13.4621	8.1509	9.2629	8.7853	7.8367	8.8367	12.0001	8.0336	8.5183	8.9737	12.5192	8.7538	8.7596	7.9628	6.8059	7.8927	13.3468	6.5865	7.7961	10.9084	6.2051	5.7468	8.2272	8.0451	7.8026	7.6156	7.4232	8.1073	9.5684	9645	8.2147	12281	9.5119	11.6509	10.8276	7.6165	14.2271
	1	6.0037	10.9463	9.2192	11.9692	13.1984	9.2752	7.4719	5936	8.8274	10.3658	12.9977	13.0917	8.1572	9.7797	8933	7.7559	8.7889	10.5105	7.7896	8.7707	9.3675	11.9505	9137	8.8839	8.1671	6.2188	8.9466	13.3812	6.6726	8.4212	10602	7.8462	5.6721	7.8559	8.0935	7.8121	7.5549	8.0751	7.9806	9.6793	9.2147	8.3726	11.5691	9.4326	10.7826	11.6779	7946	14.4181
	2	6.2571	11.0625	9.4257	11.9272	14.3596	9.3055	8.1561	6.4811	8.1946	10.1015	12972	12.8241	8.4531	9284	8.2714	7.5427	9.1104	10.4248	8.0588	8.7703	10.1409	11.9878	9531	8.7456	8.2073	7.0312	9.3968	13.8518	6.9744	7.8762	10.7553	7.1139	5313	7.4021	8.8393	7.4067	7.3087	8.0239	8.6764	9.5176	9.1666	7.5433	12.2958	8.5523	11.4869	10.6516	8.1023	16.2644
	3	6.0176	11.5737	9.1511	11578	14.2036	8.3836	7.4122	6.1827	7841	9.9021	13.6409	13.1073	8.1602	9.9403	8.9648	7.4174	9.8814	10.4485	8.6166	9.3877	9.7521	12.8266	9.3324	8.2408	8.7841	6.9317	7.7363	11.6653	7.2616	7648	11.6875	7.2309	5.7066	8.2258	8.5717	8.3117	7.8309	8.1757	8.2835	9079	9.5867	9.0377	12.0923	9.1589	11.0399	11.0126	8.0071	15.6145
	4	6.5492	11.4971	9.3816	11809	13.4365	9.3579	7603	5.9652	9.0469	10.2436	14.3844	13.3309	7.9322	10.3932	8193	7.6379	8897	10974	8.8898	9.4493	9.5311	12.6955	9.0536	8.4806	8.4344	6.8327	9.0083	13.1437	7795	7.7839	11682	6.8371	5.7226	8.3469	8.2901	7.9949	7.6609	8.1206	8.9938	9.6015	9.3059	8828	11.7185	9.3575	11.1306	11.2238	7.6358	15574
	5	5.8333	12.3044	9.6453	11.7975	13.5643	9.4615	7.0722	6.0106	8.7315	11.4532	13.4133	12.5222	8.2518	9.9479	8.6752	8.3251	9072	11.4348	8.6339	9.5162	10.3114	12.8654	9.9816	8.4203	8.2054	7.2218	8.8296	14.2065	7.1855	8.0143	11.6015	7.6953	6.0201	8.1565	9.0743	8.5724	6.9257	7.9336	9.0193	9.8423	9.3579	8.5491	11.5128	8.9902	11.7894	11.1858	7.8439	15.2662
	6	6.0768	11.6846	9.4158	11764	14.1706	9.3768	7.5905	6.4735	8226	11.1968	13.7503	13.5288	8.2767	10.2649	9.7364	7.9057	9.2581	10.9375	8.6183	10217	9789	12.7475	9.2831	9.1757	8.1228	7.2922	9.0278	13.8271	7.5433	8.3346	11.0232	7.3875	5886	7.8096	8.7156	8188	7.9531	8159	8.7723	9.9344	9.5014	8.7965	12.6244	8.7979	11.5902	11.9161	7767	15.2402
	7	6.1602	11.7202	9.2564	12.4116	14.3662	9.6769	7465	6.3885	8.6439	11163	13.6037	13.7626	8.7159	10.0339	9.2926	8284	9.1468	11.3265	8499	9.5572	9.6752	12.8505	9.4811	9.6336	8.1798	6.9696	7.8503	13.5629	7.0161	7.9414	11.4505	7.4109	5.8441	8.5316	8.3755	8438	7.7936	8.1958	8.4866	9.9152	9.4274	8.9051	11.9422	9.3072	11.8646	11.2765	8.1646	15.6426
	8	6.1585	11.7017	9.5466	12.3015	14.5669	9.7487	8.0965	6.3768	8.5726	10.9799	13.7084	12.9032	8.8358	10.2108	8.8479	7.8943	9.0962	10.9452	8.7179	9.2939	9.7129	13.1011	9.1385	8.8728	8.4338	7.1408	8.4321	14.5069	7.4528	8044	11.5553	6.8445	5.8785	8.7312	8.8592	8.0961	8179	7.9932	8.8386	10.3164	9.8209	9.1668	13.0778	9.2364	12.4005	11.5271	7.8992	15.5557
	9	5936	11.5237	9.2204	12.3645	13.8699	9.7464	7.8428	6.5725	9.8958	11104	13.4233	13.8104	9.3173	10.2782	9.5132	7.7125	9.0859	11.1248	8.4806	9.9241	10.2734	13.3337	9953	8.8134	8.2478	7.9701	8.7216	12942	7.6845	8.1033	11.4061	7701	5.5715	8.3774	9.3011	8.7809	8.2535	8.2424	9.3701	9.3897	9.5693	9.3473	12.6508	9.2889	11.7413	11.9686	8.0776	15.3181
N/C ratio
	Time (4min interval)	N/C 1	N/C 2	N/C 3	N/C 4	N/C 5	N/C 6	N/C 7	N/C 8	N/C 9	N/C 10	N/C 11	N/C 12	N/C 13	N/C 14	N/C 15	N/C 16	N/C 17	N/C 18	N/C 19	N/C 20	N/C 21	N/C 22	N/C 23	N/C 24	N/C 25	N/C 26	N/C 27	N/C 28	N/C 29	N/C 30	N/C 31	N/C 32	N/C 33	N/C 34	N/C 35	N/C 36	N/C 37	N/C 38	N/C 39	N/C 40	N/C 41	N/C 42	N/C 43	N/C 44	N/C 45	N/C 46	N/C 47	N/C 48
	0	12.021136063408191	7.169827081024854	12.167239004730575	8.876326250326425	7.373089467477199	7.9443599487409156	12.4379259159301	5.6857882920436	11.606965804433084	9.61956380413907	6.828019782334044	7.84216750260685	8.278067675633075	12.18797820534919	6.793915148946766	8.802452245682849	10.700671342491235	7.616151692167867	8.686212518975681	7.706853139767065	6.551135828552197	9.498511779438353	10.42742210225635	6.470819408616925	13.049491969845949	9.06806478045661	7.430465596192083	9.321015934029097	6.57865823937866	10.410262710212235	7.623150101645264	6.025410216522855	11.198344450225358	7.006433976163204	6.491271385830888	7.789272554658979	8.487863812561718	6.9417870669098045	12.36164752844812	9.708562517058779	6.950048999827059	7.992796004526335	8.747431363540855	10.704595304198493	8.6549468671884	8.340034569133646	7.868984227937606	10.496126044108946
	1	11.717234407141547	7.088190708935628	11.870729160362744	9.149323577479388	7.574461100714093	7.952554922889746	12.320393888527963	5.529761594240701	11.961862534927274	9.642595681306343	6.4049344462151465	7.233099314850901	7.704317126361114	12.467475845118095	6.737152989107277	8.45233891744151	10.378527103863208	6.639121833144255	8.110981416672827	7.668405107781892	6.65467510906421	8.943505602740863	10.716732035956236	6.510765162763634	12.498221010894298	7.841129744042365	8.217698372093665	9.305877198472805	6.504396311387518	11.19251032700865	7.50296700520367	7.5575688866499515	11.48293684293636	6.673876402585311	6.478593864567091	7.718269003721755	8.844974980858074	7.492776403474751	11.954074639944281	9.988473211309667	6.595515333014582	8.273737115210352	8.060624513590211	10.20634285157814	7.808815605754245	9.049380687876608	7.724041931068807	10.29734833335238
	2	12.315695618028615	7.015951657952617	11.63019109113321	9.084960898076018	7.999589981738589	7.872586849721619	12.973042615190808	5.800275287324433	10.535613268192337	9.083184217388569	6.376298964465847	6.909287218618725	7.912494629433232	11.869451376672258	6.156775437805134	8.087749622563821	10.392158428400489	6.579900778873221	8.124584762824592	7.5048026526901275	7.073049608784869	8.873666577592951	10.92016512582079	6.34128338190179	12.079417760083597	8.785288215728855	8.523352414608198	9.3018477045553	6.642190825845345	10.458955352708555	7.612065158309552	6.614517181807869	10.531219028741328	6.036415353914932	7.100004739066211	7.169400028458066	8.260471529645788	7.3733968129694	13.450740252693588	9.504341443686059	6.50130996438202	7.492009701582964	8.41656946657686	9.263214673318503	8.388063973875338	8.310771482652992	8.225509912986627	11.625458441652196
	3	11.612079063098806	7.166648399722838	11.634849496201644	8.486546353856292	7.762085701216863	7.001666984028356	11.633495149440549	5.432255615711868	10.193774010491488	8.869710093649651	6.497773801885278	7.0828945014933336	7.896741029047876	12.192662789827653	6.606430008968438	7.896025480527665	11.695473143872997	6.423256880480148	8.709213779329389	7.878330123323137	6.690064272528142	9.443245627015871	10.572956732267095	5.884671632923541	13.416247159160333	8.86888654319803	6.987574413968827	7.887486029062256	6.94350418622085	10.001386175385187	8.198986868292177	6.88136780377505	10.779148903215082	6.7120512236776495	6.700498646486297	7.858232817058805	8.602397409251292	7.57369711140302	12.267617252118896	9.176082957692387	6.781489427774913	8.866001024166001	8.094651249813403	9.624666485219212	7.788910156506304	8.353028983704442	8.10343361886102	10.897823785305647
	4	12.535289715404597	7.1462669051842775	11.589848628789067	8.670325006864894	7.287917347374908	7.693895135643555	11.704161650743998	5.367129972863838	10.733752073332496	8.999318260087291	6.982410000334936	7.149457552090177	7.200251258105979	12.944721014434087	5.925719125397706	7.877558976749654	10.191329408921222	6.708775327552563	8.785212050538341	7.823310888288919	6.4927562690783605	9.186955687981445	10.031145123422661	6.011058714957759	12.613129953641394	8.755090168702734	8.091682318628125	9.016200583487164	7.330288998642086	10.193073754069294	7.834080058906487	6.258639029096709	11.336281012036354	6.779450392541947	6.37389150214434	7.662956069002931	8.454162523767641	7.395426649071951	13.552615122185706	9.579209180237587	6.482941863284113	8.41501624761576	7.974106693867386	9.749020670111685	7.755948171039749	8.335375625869831	7.545868341110642	10.852908731455665
	5	11.151938058595805	7.601873469743316	12.118017908227559	8.669781100428363	7.320629914290509	7.59223788664323	11.059523009005936	5.426320897375133	10.575368348382174	9.947531660356743	6.250757269319454	6.884146210728915	7.544999533683589	11.628360955059465	6.283954301675007	8.504658862565343	10.526779933209715	6.782930561981707	8.459706189844903	7.846322175618371	6.988988584620348	9.408211544719608	11.318636583725777	5.813526392607557	12.078061245517864	8.818817254197054	7.8378738249314255	9.559443975662832	6.865531886432799	10.619411568285535	7.84330825827379	7.159410932305965	11.72886890381708	6.582568400120732	7.066551412640562	7.964738259248867	7.913475887190949	7.244846895352618	13.431451096490573	9.572266365820212	6.430437086110919	8.308139043326404	7.6896257378842705	9.533929535329369	8.274134119380987	8.347935890049465	7.420016705655991	10.7293485938384
	6	11.290571310191577	7.179005742786802	11.160445479070166	8.589588665014073	7.607750880061934	7.705424152504419	11.394768959631547	5.597545674883202	9.83797126824438	9.639292721373234	6.386321772562731	7.211210188909956	7.386039638153933	12.174464804601792	6.992114086850611	7.926642188662447	10.504226946942769	6.526020848660159	8.386766536234184	8.216100243338744	6.534521015404088	8.989856747628858	10.30149554842139	6.372558211569461	11.753708666384982	8.925952854831168	7.863348216074405	8.957632460509805	7.077859930941301	10.86676201887661	7.310376660273602	6.819786844158063	11.491021541272797	6.310017929125415	6.642749840516384	7.9765496454488	8.719548295143078	7.437611213208484	12.790685806352839	9.527444725974716	6.49723908026327	8.15945087308397	8.408396407629127	9.302672301766131	8.020938509736725	8.684355901100037	7.747089978754601	10.421739846972025
	7	11.145668799834992	7.114357706472194	11.203962371031698	9.044200106825851	7.66427465953777	7.729770748462338	11.431835479578133	5.580665224729112	10.208977011820062	9.675179865779954	6.355663364800883	7.437695398525173	7.840944666549117	11.594683540793262	6.524703381083515	8.328088902650633	9.872092784806984	6.714435101796918	8.380185726765914	7.7027976762329695	6.475621379081398	9.156325527839847	10.484915306532073	6.578817976202182	11.672838581244514	8.261686452782996	6.800482339345828	8.720378110873002	6.424458745233919	10.24450905976114	7.490748185126575	6.753420725289446	11.140043042071815	6.752231657041461	6.338142214123339	8.03839529318518	8.703498552692707	7.296492683743275	12.3139114436119	9.605080757580014	6.366419255524544	8.387048771483036	7.794966188872353	9.48886430716059	8.145770613133223	8.279581340195968	8.134016099466008	10.959205463558991
	8	11.012227264761947	6.928723855268737	11.63322902348434	8.752525827475312	7.751534140615189	7.945623496752455	12.228201360182569	5.487996943080363	9.847880877930205	9.424281048696855	6.249603940399812	6.89521761574413	7.671004059577513	12.10696932113799	6.2406588314290685	7.82805896503785	9.90632973979031	6.4185159512893675	8.523604436861737	7.42972898864584	6.472940723300094	9.09281457282282	10.012051492741715	6.038066604649138	12.089580266309637	8.484024731606937	7.334550524902991	9.65003016694594	7.008311838280721	10.47484487619395	7.622682085348075	6.3232375863330486	11.054799157514667	7.0161228110776825	6.703161590290888	7.579163175607678	9.02234572163874	7.137365625242766	12.277385058389324	9.934019713199524	6.63489146663604	8.631841615857248	8.670768957403316	9.52647153166775	8.545091456355637	8.392867544268407	7.747329107505569	10.621270261781534
	9	10.811618118202897	6.931011067411911	11.091903622516309	8.899037008248046	7.337022501598869	7.7057848730566345	12.122860901192222	5.569429109154031	11.32729870058515	9.485142307031937	6.213213580171483	7.328941049106728	8.248807250430044	12.112876899597543	6.675611269076283	7.84387709750613	10.022392340275326	6.539291709968823	8.148288355978146	8.06997485680086	6.765006660700681	9.168497450654785	10.661693423557274	6.022369151125701	11.38309001526431	9.371274171587407	7.651224322218869	8.286687898823267	7.046812771838058	10.506560036096731	7.6602572066968575	6.818115416590305	10.791791923637154	6.490772571926211	7.030490579500909	8.16685082050767	9.283651055750274	7.277928866598382	13.223622189481052	9.020534620649903	6.511508589423774	8.522384331059433	8.236074590028924	9.615211430310445	8.056769922343808	8.70032348344419	7.717560373457463	10.449407543334265
N/C ratio change
		N/C 1	N/C 2	N/C 3	N/C 4	N/C 5	N/C 6	N/C 7	N/C 8	N/C 9	N/C 10	N/C 11	N/C 12	N/C 13	N/C 14	N/C 15	N/C 16	N/C 17	N/C 18	N/C 19	N/C 20	N/C 21	N/C 22	N/C 23	N/C 24	N/C 25	N/C 26	N/C 27	N/C 28	N/C 29	N/C 30	N/C 31	N/C 32	N/C 33	N/C 34	N/C 35	N/C 36	N/C 37	N/C 38	N/C 39	N/C 40	N/C 41	N/C 42	N/C 43	N/C 44	N/C 45	N/C 46	N/C 47	N/C 48
	slope	-0.036392000772732476	-0.003455914033084712	-0.021767736015970797	-0.003740012663557528	-0.001805999880531188	-0.0013638816878607807	-0.019011796545889546	-0.0028523854773936136	-0.030566437526005935	0.005271126701767466	-0.011802660874967178	-0.006397777810344933	-0.003093395463389827	-0.00900644032435262	-0.0017958589337364922	-0.01678255998448788	-0.023103801292307848	-0.015425548877557508	-0.0029815137817089258	0.005490393006730714	-0.003492184568727252	-0.0025008821191921486	-0.00685979257344075	-0.007410820968383291	-0.03850558012723087	0.007342525210293364	-0.015812187666341595	-0.009172040635505597	0.009985529089821121	-0.0033435580951348405	-0.003168511794133537	-0.00014458418158347095	-0.0016418343403626866	-0.00010473960474485604	0.0047500722590437675	0.011251776658926044	0.01580239622802261	-0.0006150868861519148	0.008764912833348393	-0.007609979537199247	-0.00795596988223464	0.014426809295895541	-0.0042158510999607875	-0.022146029727721644	-0.0003437232501055519	-0.0007612143520927486	-0.004321448604001455	-0.004600136137957876
	intercept	12.216401855776082	7.196392112045844	12.001860826842206	8.889581707403503	7.600343567312153	7.73894037022582	12.272833230768395	5.599059799733712	11.233142265301971	9.34369968534915	6.66694758799837	7.312571655853698	7.824047805038564	12.290080401097478	6.526028918841236	8.456831205659574	10.834866540518968	6.972499948387538	8.485142825473332	7.685835511127639	6.732735267348529	9.221174989988997	10.668197613792069	6.337788441162669	12.956479105124844	8.585856037928133	7.958444612290591	9.16575673768125	6.662461849803346	10.557011633572216	7.726895371102009	6.723749977521429	11.182998498673326	6.637879384702861	6.607034276853904	7.589850786829205	8.344795844745619	7.328204496748181	12.604606607971357	9.69858118099047	6.718387564504348	8.04515990546503	8.285206836719965	10.100127444165022	8.15012595803334	8.493067409167228	7.90117110455246	10.817866155019246
	rvalue	-0.7591712958199186	-0.22086085657791116	-0.7006903427958412	-0.20209036107936443	-0.09284100451687625	-0.058732917293893926	-0.39514097551053345	-0.26628630446348633	-0.5060577911431791	0.18471534176160267	-0.560751585105662	-0.2631734093089167	-0.10887722176654792	-0.27716610176051326	-0.06561794336262652	-0.5910559124866396	-0.5307755078070818	-0.5402138039107086	-0.14499126905201132	0.2787264434688639	-0.19709909830404565	-0.1407146778771534	-0.21004018536547012	-0.320617255661102	-0.7366756867694209	0.20684854172559322	-0.3520120045847239	-0.19739299284405226	0.4128748951235142	-0.1187336967643659	-0.15752856285572822	-0.00390972898139709	-0.053203547443811644	-0.004221083802667732	0.201136501082274	0.4802630206043751	0.4954798015268726	-0.04074085024715402	0.17651691372368572	-0.31094126227065244	-0.5505111720943019	0.46543319676251316	-0.14485095267083326	-0.6114190624525672	-0.013089481097832806	-0.03679464514407375	-0.20084502711332272	-0.14520204920455929
	p-value	0.010875761139261416	0.5397521358610602	0.02400659307002771	0.5755436995828144	0.7986517899972512	0.8719640197680104	0.25841560704123084	0.457075319301415	0.13559047693524118	0.609441838916178	0.0917429140481774	0.4625510977942965	0.7646343669159801	0.4381682451750596	0.8570771929048622	0.07194670744235525	0.11444651760026324	0.10695504873077262	0.6894155800701389	0.4354865221664145	0.5852084270709907	0.6982094693914233	0.5602762487489328	0.36640752361602913	0.01508999254670894	0.5663868765074558	0.31850494684196234	0.5846376885756576	0.23568694089370418	0.7439007629650948	0.6638308801719506	0.9914475985858362	0.8839461159136052	0.9907665437003921	0.5773860260908561	0.16004943625776008	0.14532250231984223	0.9110271667192171	0.6256771454933557	0.38185206972763897	0.09914286299081618	0.17523286711415295	0.6897035861647394	0.06034845962287566	0.9713716654564684	0.9196205939969926	0.5779494330791288	0.6889830112049105
	stderr	0.011031367422987019	0.005395600442368583	0.007836373443084655	0.006408079521071069	0.006847831881634072	0.008195958967143488	0.015626518352047113	0.003650426935584982	0.018418684322150842	0.009915557455600944	0.00616149952253718	0.008291942575835596	0.009985364530671066	0.011038524241510457	0.009655341055015096	0.00809765624009388	0.013042884897093756	0.008495685466819865	0.0071934352520904065	0.006688351581166747	0.0061413462358020044	0.006221083617401773	0.011289273474937704	0.0077406989190961	0.012497040663834409	0.012278701394087163	0.014864942931391477	0.016104938640963237	0.00778797934244387	0.009885686465703782	0.007022544091107569	0.013074521832740882	0.010895024685169955	0.008772797275636629	0.008178935875888287	0.007265378017320627	0.009794483825822665	0.005333357083243	0.017279959158479595	0.008223938935996933	0.0042655879486175165	0.009699558062320568	0.010181559352415041	0.010133440098681777	0.009283340452838592	0.0073094242973993015	0.007452161542778957	0.011082193782539192
[truncated: 16 more columns]
